# Supplementary material for: A network-based approach reveals novel invasion and Maurer's clefts-related proteins in Plasmodium falciparum
Source: Royal Society of Chemistry journal article supplement (doi:10.1039/c9mo00124g), 2019-10-10
Supplement: c9mo00124g1.zip [file c9mo00124g1.zip]

Archive with 8 entries (8 files):
- Supplementary_file_1.xls
- supplementary_file_2.pdf
- supplementary_file_3.xls
- supplementary_file_4.xls
- supplementary_file_5.xls
- supplementary_file_6.xls
- supplementary_file_7.xls
- supplementary_file_8.xls
