# Supplementary material for: A network-based approach reveals novel invasion and Maurer's clefts-related proteins in Plasmodium falciparum
Source: Royal Society of Chemistry journal article supplement (doi:10.1039/c9mo00124g), 2019-10-10
Supplement: c9mo00124g1.zip [file c9mo00124g1.zip › Supplementary_file_1.xls]

## Sheet: Sheet2
A network-based approach reveals novel invasion and Maurer’s clefts-related proteins in Plasmodium falciparum
Dibyajyoti Das, Sowmya Ramaswamy Krishnan, Arijit Roy* and Gopalakrishnan Bulusu*
TCS Innovation Labs – Hyderabad (Life Sciences Division), Tata Consultancy Services Limited, Hyderabad, India
* Corresponding author
E-mail: roy.arijit3@tcs.com, g.bulusu@tcs.com
Supplementary file 1: Number of Plasmodium falciparum genes expressed according to DNA microarray and RNA-seq data during seven intra-erythrocytic stages.
Tab Expression: Expression of Plasmodium falciparum genes

## Sheet: Expression
GeneID as in PlasmoDB
Expression of the gene in respective stages:
Early Ring (ER), Late Ring (LR), Early Trophozoite (ET), Late Trophozoite (LT), Early Schizont (ES), Late Schizont (LS) and Merozoite (M)
D: Expressed as per DNA microarray data
R: Expressed as per RNA Seq data
DR: Expressed as per both DNA microarray and RNA Seq data
0: Genes not expressed
GeneID	ER	LR	ET	LT	ES	LS	M
PF3D7_0100100	D	D	D	D	D	D	D
PF3D7_0100200	0	D	D	D	D	D	0
PF3D7_0100300	0	D	D	D	D	D	D
PF3D7_0100400	D	D	D	D	D	0	D
PF3D7_0100800	0	0	D	0	0	0	0
PF3D7_0100900	D	D	0	0	0	0	0
PF3D7_0101000	0	0	D	0	0	0	0
PF3D7_0101300	0	D	D	DR	0	0	0
PF3D7_0101500	D	D	D	0	0	D	D
PF3D7_0101600	0	0	D	D	0	0	D
PF3D7_0101700	D	0	D	0	0	0	0
PF3D7_0101800	D	D	D	D	D	D	D
PF3D7_0101900	0	D	0	0	0	0	D
PF3D7_0102100	0	0	0	0	0	0	D
PF3D7_0102200	DR	DR	DR	DR	DR	DR	D
PF3D7_0102300	0	0	0	R	R	R	0
PF3D7_0102500	DR	DR	D	0	DR	DR	D
PF3D7_0102600	0	D	DR	DR	0	0	D
PF3D7_0102700	DR	DR	D	D	D	DR	D
PF3D7_0102800	0	0	0	D	D	0	0
PF3D7_0102900	DR	DR	DR	DR	DR	D	D
PF3D7_0103000	0	0	0	0	D	0	0
PF3D7_0103100	0	0	0	D	D	0	0
PF3D7_0103200	DR	DR	DR	DR	DR	DR	D
PF3D7_0103300	D	DR	DR	DR	D	D	D
PF3D7_0103400	DR	D	D	DR	DR	D	D
PF3D7_0103600	D	D	D	D	D	D	0
PF3D7_0103700	D	D	D	D	D	D	D
PF3D7_0103800	D	D	D	DR	DR	DR	D
PF3D7_0103900	R	R	DR	DR	DR	D	0
PF3D7_0104100	0	0	0	D	DR	D	0
PF3D7_0104200	DR	DR	DR	DR	DR	DR	D
PF3D7_0104300	DR	DR	DR	D	D	D	D
PF3D7_0104400	DR	D	D	DR	DR	DR	D
PF3D7_0104500	DR	DR	DR	DR	DR	D	D
PF3D7_0104600	0	0	D	D	D	0	0
PF3D7_0104700	D	D	0	D	D	D	0
PF3D7_0104800	R	DR	D	DR	DR	DR	D
PF3D7_0105100	0	0	D	R	0	0	0
PF3D7_0105200	DR	D	D	DR	DR	DR	0
PF3D7_0105300	R	0	0	DR	DR	DR	0
PF3D7_0105400.2	R	D	0	R	DR	DR	D
PF3D7_0105500	0	0	0	R	0	0	0
PF3D7_0105600	D	DR	D	DR	D	D	0
PF3D7_0105700	0	0	D	D	D	D	0
PF3D7_0105800	R	R	D	DR	DR	DR	D
PF3D7_0105900	R	0	D	DR	DR	D	0
PF3D7_0106000	R	0	D	DR	DR	DR	D
PF3D7_0106100	DR	DR	DR	DR	DR	DR	D
PF3D7_0106200	0	0	0	0	DR	0	0
PF3D7_0106300	DR	DR	DR	DR	DR	DR	D
PF3D7_0106400	DR	DR	DR	DR	D	0	D
PF3D7_0106500	0	0	0	D	D	D	0
PF3D7_0106600	0	0	D	0	0	0	0
PF3D7_0106700	DR	DR	DR	DR	D	D	D
PF3D7_0106800	R	0	D	DR	DR	DR	0
PF3D7_0106900	0	0	0	D	DR	0	0
PF3D7_0107000	R	0	D	DR	DR	D	D
PF3D7_0107100	0	D	D	DR	D	0	0
PF3D7_0107200	0	0	D	D	D	0	0
PF3D7_0107300	0	0	D	0	0	D	D
PF3D7_0107400	0	D	D	DR	DR	R	0
PF3D7_0107500	DR	DR	DR	DR	DR	DR	D
PF3D7_0107700	0	0	0	R	0	0	0
PF3D7_0107800	0	0	D	D	D	0	0
PF3D7_0107900	0	R	DR	DR	0	0	0
PF3D7_0108000	DR	DR	DR	DR	DR	DR	D
PF3D7_0108100	0	0	D	0	D	0	0
PF3D7_0108300	DR	DR	DR	DR	D	D	D
PF3D7_0108400.2	DR	DR	D	DR	DR	DR	D
PF3D7_0108500	DR	DR	DR	DR	DR	DR	D
PF3D7_0108600	D	D	D	DR	D	D	D
PF3D7_0108700	DR	DR	DR	D	D	D	D
PF3D7_0108800	DR	DR	D	DR	DR	DR	D
PF3D7_0109000	R	R	R	R	DR	DR	D
PF3D7_0109100	0	0	0	0	D	D	D
PF3D7_0109200	R	DR	DR	DR	DR	0	0
PF3D7_0109300	R	0	D	DR	DR	DR	0
PF3D7_0109400	DR	0	D	DR	D	0	0
PF3D7_0109500	R	R	R	R	0	0	0
PF3D7_0109600	0	0	0	0	0	D	0
PF3D7_0109700	DR	R	DR	R	0	0	0
PF3D7_0109800	DR	DR	DR	DR	DR	D	D
PF3D7_0109900.2	D	D	D	DR	DR	D	D
PF3D7_0110000	DR	DR	DR	DR	DR	DR	D
PF3D7_0110100	0	DR	D	DR	D	0	0
PF3D7_0110200	D	DR	D	DR	DR	0	0
PF3D7_0110400	DR	DR	DR	DR	DR	D	D
PF3D7_0110500	D	D	D	D	D	D	0
PF3D7_0110600	DR	DR	DR	DR	DR	D	D
PF3D7_0110700	DR	DR	D	DR	DR	DR	D
PF3D7_0110800	DR	DR	DR	DR	DR	DR	D
PF3D7_0110900	D	0	D	DR	D	D	0
PF3D7_0111000	0	0	0	0	D	D	0
PF3D7_0111300	R	0	D	DR	DR	D	0
PF3D7_0111400	0	0	0	0	D	0	0
PF3D7_0111500	0	0	D	DR	DR	DR	D
PF3D7_0111600	0	0	D	R	R	0	0
PF3D7_0111700	0	0	0	DR	R	0	0
PF3D7_0111800	D	D	D	DR	D	D	0
PF3D7_0111900	DR	D	D	DR	D	0	0
PF3D7_0112000	0	0	D	DR	D	D	0
PF3D7_0112200	0	0	D	DR	DR	D	0
PF3D7_0112800	R	R	0	0	0	0	D
PF3D7_0112900	0	0	0	0	R	DR	D
PF3D7_0113000	DR	DR	DR	DR	D	D	D
PF3D7_0113200	DR	DR	DR	DR	DR	D	0
PF3D7_0113300	DR	DR	DR	DR	D	DR	D
PF3D7_0113400	0	0	D	0	0	0	0
PF3D7_0113700	DR	DR	DR	R	D	DR	D
PF3D7_0113900	DR	DR	DR	DR	DR	DR	D
PF3D7_0114100	R	0	R	R	R	0	0
PF3D7_0114200	0	0	0	0	0	0	D
PF3D7_0114300	0	0	0	0	0	D	0
PF3D7_0114500	D	D	DR	D	D	0	0
PF3D7_0114700	0	D	D	D	0	D	D
PF3D7_0115000	0	0	0	0	D	0	0
PF3D7_0115200	D	0	D	0	D	0	D
PF3D7_0115400	D	D	D	D	D	D	D
PF3D7_0115500	0	0	D	0	0	0	0
PF3D7_0115600	0	D	D	DR	D	D	D
PF3D7_0115700	D	D	D	D	0	0	D
PF3D7_0200100	0	D	0	D	0	0	0
PF3D7_0200200	D	D	D	D	0	D	D
PF3D7_0200400	0	D	D	D	0	0	D
PF3D7_0200600	D	0	D	D	0	0	D
PF3D7_0200700	D	D	D	0	0	0	0
PF3D7_0200900	0	0	D	D	0	0	D
PF3D7_0201000	D	0	0	0	0	0	D
PF3D7_0201300	D	D	D	D	D	D	D
PF3D7_0201500	DR	D	DR	DR	DR	D	D
PF3D7_0201600	DR	DR	DR	DR	D	D	D
PF3D7_0201700	DR	DR	DR	D	0	DR	D
PF3D7_0201800	DR	DR	DR	DR	D	DR	D
PF3D7_0201900	D	DR	DR	DR	D	D	D
PF3D7_0202000	DR	DR	DR	DR	DR	DR	D
PF3D7_0202100	DR	DR	DR	DR	DR	DR	D
PF3D7_0202200	DR	DR	DR	R	R	DR	D
PF3D7_0202300	0	0	0	R	0	0	0
PF3D7_0202400	D	D	D	DR	D	D	0
PF3D7_0202500	DR	DR	DR	DR	DR	DR	D
PF3D7_0202600.2	D	D	0	D	D	D	D
PF3D7_0202700	R	D	D	DR	DR	D	D
PF3D7_0202900	0	0	0	DR	DR	D	0
PF3D7_0203000	0	0	0	0	0	D	D
PF3D7_0203200	R	R	R	D	D	D	D
PF3D7_0203300	0	0	D	DR	DR	D	0
PF3D7_0203400	R	R	D	DR	DR	DR	0
PF3D7_0203600	0	0	0	0	R	0	0
PF3D7_0203700	DR	DR	DR	DR	D	D	D
PF3D7_0203900	0	0	D	DR	D	0	0
PF3D7_0204000	0	0	D	D	D	D	0
PF3D7_0204100	R	0	0	0	R	0	0
PF3D7_0204200	DR	DR	DR	DR	DR	DR	D
PF3D7_0204300	0	R	R	0	0	0	0
PF3D7_0204400	0	R	0	R	0	0	0
PF3D7_0204500	DR	DR	DR	DR	DR	R	D
PF3D7_0204600	0	D	D	DR	0	0	0
PF3D7_0204700	DR	DR	DR	DR	DR	DR	D
PF3D7_0204800	0	0	D	DR	D	0	0
PF3D7_0204900	R	0	0	R	0	0	0
PF3D7_0205000	0	0	0	D	0	0	0
PF3D7_0205200	D	D	D	D	D	D	D
PF3D7_0205400	DR	R	R	R	R	R	0
PF3D7_0205500	DR	DR	DR	DR	DR	R	0
PF3D7_0205600	D	D	D	DR	DR	D	D
PF3D7_0205800	R	0	0	R	R	R	0
PF3D7_0205900	DR	DR	DR	DR	DR	DR	D
PF3D7_0206000	D	D	D	D	D	D	D
PF3D7_0206100	D	DR	D	DR	DR	DR	D
PF3D7_0206200	DR	DR	D	D	DR	DR	D
PF3D7_0206300	DR	DR	DR	DR	D	DR	D
PF3D7_0206500	R	R	R	R	0	0	0
PF3D7_0206600	DR	D	D	DR	D	D	D
PF3D7_0206700	DR	DR	DR	DR	DR	DR	D
PF3D7_0206800	DR	DR	DR	DR	DR	DR	D
PF3D7_0206900.2	D	D	D	D	D	D	D
PF3D7_0207000	DR	DR	DR	DR	DR	DR	D
PF3D7_0207100	R	R	0	D	DR	DR	D
PF3D7_0207200	0	0	D	0	0	0	0
PF3D7_0207400	R	0	D	DR	DR	DR	D
PF3D7_0207500	R	0	0	DR	DR	DR	0
PF3D7_0207600	DR	DR	DR	DR	DR	DR	D
PF3D7_0207700	R	0	0	DR	DR	DR	D
PF3D7_0207800	DR	D	D	DR	DR	DR	D
PF3D7_0207900	D	D	D	D	D	D	D
PF3D7_0208100.2	0	0	D	D	D	0	0
PF3D7_0208200	DR	DR	DR	DR	DR	DR	D
PF3D7_0208300	DR	DR	D	DR	D	0	D
PF3D7_0208400	D	DR	D	D	D	D	0
PF3D7_0208500	0	0	D	DR	DR	DR	D
PF3D7_0208600	0	0	D	DR	DR	0	0
PF3D7_0208700.2	D	D	D	D	D	D	0
PF3D7_0208800	R	R	R	R	R	R	0
PF3D7_0208900	0	D	D	D	D	0	D
PF3D7_0209100	DR	R	DR	DR	DR	0	D
PF3D7_0209200	DR	DR	DR	DR	0	DR	D
PF3D7_0209300	0	0	D	DR	D	D	0
PF3D7_0209400	0	0	0	R	R	0	0
PF3D7_0209600	DR	D	D	D	DR	DR	D
PF3D7_0209700	DR	DR	DR	DR	DR	DR	D
PF3D7_0209800	DR	DR	DR	DR	DR	DR	D
PF3D7_0210000	DR	DR	DR	DR	DR	DR	0
PF3D7_0210100.2	DR	DR	DR	DR	DR	DR	D
PF3D7_0210200	0	0	D	D	D	D	0
PF3D7_0210300	DR	D	D	DR	DR	DR	D
PF3D7_0210400	0	0	0	R	R	0	0
PF3D7_0210500	0	0	0	R	0	0	0
PF3D7_0210600	DR	R	D	DR	DR	DR	D
PF3D7_0210700	0	R	0	0	R	R	0
PF3D7_0210800	R	R	R	R	R	DR	D
PF3D7_0210900	DR	DR	DR	DR	DR	DR	D
PF3D7_0211100	0	0	D	0	0	0	0
PF3D7_0211200	DR	D	D	DR	DR	D	D
PF3D7_0211300	0	0	0	R	0	0	0
PF3D7_0211400	0	0	D	D	D	0	D
PF3D7_0211600	0	0	0	0	DR	DR	0
PF3D7_0211700	0	0	D	D	D	0	0
PF3D7_0211800	DR	DR	DR	DR	DR	DR	D
PF3D7_0211900	R	0	D	DR	DR	D	0
PF3D7_0212000	DR	D	D	DR	DR	DR	D
PF3D7_0212100	DR	DR	DR	DR	D	D	0
PF3D7_0212200	R	R	DR	DR	R	0	0
PF3D7_0212300	DR	DR	DR	DR	DR	DR	D
PF3D7_0212400	DR	DR	D	DR	D	D	D
PF3D7_0212500	DR	DR	D	D	D	D	D
PF3D7_0212600	DR	R	D	D	DR	DR	D
PF3D7_0212700	0	0	D	DR	D	0	0
PF3D7_0212800	0	0	0	0	R	0	0
PF3D7_0212900	R	D	D	DR	DR	DR	D
PF3D7_0213000	DR	0	D	DR	DR	D	D
PF3D7_0213100	DR	DR	DR	DR	DR	DR	D
PF3D7_0213200	0	0	D	R	DR	0	0
PF3D7_0213400	0	0	D	DR	DR	0	0
PF3D7_0213500	0	0	0	R	0	0	0
PF3D7_0213700	DR	DR	DR	DR	R	0	0
PF3D7_0213900	DR	DR	D	DR	D	0	D
PF3D7_0214000	DR	DR	DR	DR	DR	DR	D
PF3D7_0214100	DR	DR	DR	DR	DR	DR	D
PF3D7_0214200	R	R	DR	DR	DR	DR	D
PF3D7_0214400	DR	DR	DR	D	D	D	D
PF3D7_0214500	0	0	0	R	0	0	0
PF3D7_0214600	0	0	0	D	D	DR	D
PF3D7_0214700	0	0	0	0	R	R	0
PF3D7_0214800	DR	DR	DR	DR	DR	DR	D
PF3D7_0214900	0	0	0	D	D	D	D
PF3D7_0215000	0	D	D	D	D	D	D
PF3D7_0215100	DR	DR	DR	DR	DR	DR	0
PF3D7_0215300	DR	DR	DR	0	0	DR	D
PF3D7_0215400	DR	DR	DR	DR	DR	DR	D
PF3D7_0215500	DR	DR	DR	DR	D	D	D
PF3D7_0215600	DR	DR	DR	DR	DR	D	0
PF3D7_0215700	DR	DR	DR	DR	DR	DR	D
PF3D7_0215800	0	0	D	DR	DR	D	0
PF3D7_0215900	D	0	D	D	DR	D	0
PF3D7_0216000	0	0	0	0	D	D	0
PF3D7_0216200	R	R	DR	DR	D	0	0
PF3D7_0216300	D	D	D	DR	0	0	0
PF3D7_0216400	R	0	D	DR	DR	D	0
PF3D7_0216500	0	0	0	0	D	0	0
PF3D7_0216600	DR	DR	DR	DR	DR	DR	D
PF3D7_0216700.2	0	0	0	D	D	D	D
PF3D7_0216800	0	0	0	0	DR	D	0
PF3D7_0216900	0	0	D	D	D	0	0
PF3D7_0217100	R	D	D	DR	DR	DR	D
PF3D7_0217200	0	0	0	D	0	0	0
PF3D7_0217300	R	R	0	R	R	R	0
PF3D7_0217400	DR	DR	DR	DR	DR	DR	0
PF3D7_0217500	DR	DR	D	DR	DR	DR	D
PF3D7_0217600	0	DR	0	R	D	0	0
PF3D7_0217700	R	R	R	R	0	0	0
PF3D7_0217800	DR	DR	DR	DR	DR	DR	D
PF3D7_0217900	R	R	D	DR	DR	DR	0
PF3D7_0218000	R	0	D	DR	DR	DR	0
PF3D7_0218100	0	0	D	DR	DR	DR	0
PF3D7_0218300	0	0	D	DR	DR	R	0
PF3D7_0218400	DR	DR	DR	DR	D	D	D
PF3D7_0218500	DR	DR	DR	DR	D	D	D
PF3D7_0218600	D	D	D	D	D	D	D
PF3D7_0218700	DR	DR	DR	DR	D	D	D
PF3D7_0219100	D	0	D	D	D	0	0
PF3D7_0219200	DR	DR	DR	DR	DR	DR	D
PF3D7_0219300	R	R	DR	R	DR	R	0
PF3D7_0219400.2	D	D	D	D	D	D	D
PF3D7_0219500	R	0	D	DR	DR	R	0
PF3D7_0219600	R	0	D	DR	DR	DR	0
PF3D7_0219700	DR	DR	DR	DR	DR	DR	D
PF3D7_0219800	DR	DR	DR	DR	DR	DR	D
PF3D7_0219900	DR	DR	R	R	R	R	D
PF3D7_0220000	DR	DR	DR	D	DR	DR	D
PF3D7_0220100	DR	DR	DR	R	D	R	D
PF3D7_0220200	DR	DR	DR	DR	DR	DR	D
PF3D7_0220300	D	DR	DR	DR	DR	DR	D
PF3D7_0220500	0	0	R	0	DR	DR	0
PF3D7_0220600	DR	DR	DR	DR	DR	DR	D
PF3D7_0220700	R	DR	DR	DR	R	DR	D
PF3D7_0220800	R	R	0	R	DR	DR	0
PF3D7_0221200	0	0	0	R	0	0	0
PF3D7_0221400	D	0	0	0	0	0	D
PF3D7_0221700	DR	R	0	0	0	0	0
PF3D7_0221800	0	0	0	0	0	D	0
PF3D7_0222100	0	0	D	R	D	0	0
PF3D7_0222600	0	0	D	0	0	0	D
PF3D7_0222700	0	0	0	0	0	0	D
PF3D7_0222800	0	D	D	D	0	0	0
PF3D7_0222900	D	0	0	0	0	0	0
PF3D7_0223100	0	0	D	DR	0	0	0
PF3D7_0223200	D	D	D	D	D	0	D
PF3D7_0223400	0	0	D	D	D	0	D
PF3D7_0223500	D	D	D	D	D	D	D
PF3D7_0300100	D	D	D	D	D	D	D
PF3D7_0300400	0	0	D	0	0	0	0
PF3D7_0300500	0	D	D	D	0	0	D
PF3D7_0300700	D	0	D	0	0	D	D
PF3D7_0301200	DR	DR	0	0	D	DR	D
PF3D7_0301300	DR	DR	DR	DR	DR	DR	D
PF3D7_0301400	D	D	DR	DR	DR	D	D
PF3D7_0301500	R	R	R	R	R	0	0
PF3D7_0301600	DR	DR	DR	DR	D	DR	D
PF3D7_0301700	DR	DR	DR	DR	DR	DR	D
PF3D7_0301800	DR	DR	DR	R	R	DR	D
PF3D7_0301900	0	0	0	R	0	0	0
PF3D7_0302000	DR	DR	DR	DR	D	D	D
PF3D7_0302100	DR	DR	DR	DR	0	D	D
PF3D7_0302200	D	D	D	D	DR	DR	D
PF3D7_0302500	DR	DR	DR	DR	DR	DR	D
PF3D7_0302600	0	D	D	DR	D	D	0
PF3D7_0302700	0	0	0	R	DR	0	0
PF3D7_0302800	R	R	R	R	R	R	0
PF3D7_0302900	DR	DR	DR	DR	DR	DR	D
PF3D7_0303000	D	DR	D	DR	D	D	D
PF3D7_0303100	0	0	0	D	R	D	D
PF3D7_0303200	DR	DR	D	DR	DR	DR	D
PF3D7_0303300	DR	DR	DR	DR	DR	R	D
PF3D7_0303400	R	0	0	DR	DR	DR	0
PF3D7_0303500	0	D	D	D	D	D	0
PF3D7_0303600	0	0	0	R	0	0	0
PF3D7_0303700	R	0	D	R	DR	0	0
PF3D7_0303800	0	D	D	DR	DR	D	0
PF3D7_0303900	0	D	0	0	D	D	0
PF3D7_0304100	DR	DR	0	D	DR	DR	D
PF3D7_0304200	DR	DR	DR	DR	DR	DR	D
PF3D7_0304400	DR	DR	DR	DR	DR	DR	D
PF3D7_0304500	0	0	D	DR	DR	0	0
PF3D7_0304600	D	D	D	DR	D	D	D
PF3D7_0304800	0	0	D	D	D	0	0
PF3D7_0304900	R	DR	R	R	0	R	0
PF3D7_0305000	R	DR	DR	DR	DR	DR	D
PF3D7_0305100	0	0	D	D	D	0	0
PF3D7_0305200	DR	R	DR	D	DR	D	D
PF3D7_0305300	DR	DR	R	R	R	R	D
PF3D7_0305400	R	0	0	DR	DR	DR	0
PF3D7_0305500	DR	DR	DR	DR	DR	D	D
PF3D7_0305600	R	R	D	DR	DR	DR	0
PF3D7_0305700	DR	DR	DR	DR	DR	DR	D
PF3D7_0305900	0	0	0	R	R	R	0
PF3D7_0306000	0	0	0	DR	DR	DR	D
PF3D7_0306100	R	R	R	R	0	0	0
PF3D7_0306200	0	D	D	DR	D	D	0
PF3D7_0306300	DR	DR	DR	DR	DR	DR	0
PF3D7_0306400	R	0	D	DR	DR	DR	0
PF3D7_0306500	R	0	D	DR	DR	D	D
PF3D7_0306600	DR	D	D	DR	DR	D	D
PF3D7_0306700	D	D	DR	DR	D	D	D
PF3D7_0306800	DR	DR	DR	DR	DR	DR	D
PF3D7_0306900	DR	DR	DR	DR	DR	DR	D
PF3D7_0307100	DR	DR	DR	DR	DR	R	D
PF3D7_0307200	DR	DR	DR	DR	DR	DR	D
PF3D7_0307400	R	0	D	DR	DR	DR	D
PF3D7_0307500	0	0	D	DR	DR	D	0
PF3D7_0307600	R	D	D	D	D	D	0
PF3D7_0307700	DR	DR	D	DR	DR	D	D
PF3D7_0307800	D	DR	DR	DR	DR	0	0
PF3D7_0307900	0	0	0	D	0	0	0
PF3D7_0308000	D	D	D	DR	DR	D	D
PF3D7_0308100	R	0	0	D	DR	D	0
PF3D7_0308200	DR	DR	DR	DR	DR	DR	D
PF3D7_0308300	R	R	0	0	DR	DR	D
PF3D7_0308500	D	DR	DR	DR	DR	DR	D
PF3D7_0308600	DR	DR	DR	DR	DR	DR	D
PF3D7_0308700	R	R	0	0	DR	DR	D
PF3D7_0308800	D	0	D	DR	DR	DR	D
PF3D7_0308900	DR	DR	DR	DR	D	DR	D
PF3D7_0309000	DR	DR	DR	DR	D	D	D
PF3D7_0309100	D	D	D	D	D	D	D
PF3D7_0309200	0	D	D	D	D	D	D
PF3D7_0309300	DR	DR	DR	DR	DR	DR	D
PF3D7_0309500	DR	DR	DR	DR	DR	DR	D
PF3D7_0309600	DR	DR	DR	DR	DR	DR	D
PF3D7_0309800	DR	DR	DR	DR	D	0	D
PF3D7_0309900	0	0	0	D	0	0	0
PF3D7_0310000	0	0	0	DR	R	0	D
PF3D7_0310100	D	D	D	D	D	D	D
PF3D7_0310200	D	DR	D	D	D	D	D
PF3D7_0310300	DR	DR	DR	DR	D	0	D
PF3D7_0310400	DR	D	D	DR	DR	DR	D
PF3D7_0310500	D	DR	DR	D	D	D	0
PF3D7_0310600.2	R	R	R	R	R	R	0
PF3D7_0310700	R	R	DR	DR	R	R	0
PF3D7_0310800	R	R	R	R	R	0	0
PF3D7_0310900	R	0	0	R	0	0	0
PF3D7_0311100	D	DR	DR	D	D	D	D
PF3D7_0311200	0	D	D	DR	D	0	0
PF3D7_0311300	R	R	D	DR	DR	DR	0
PF3D7_0311400	0	0	0	D	0	0	0
PF3D7_0311500	DR	R	R	R	R	DR	0
PF3D7_0311600	0	0	D	DR	R	0	0
PF3D7_0311700	0	0	D	0	0	D	D
PF3D7_0311800	0	0	D	DR	DR	D	0
PF3D7_0311900	D	D	D	D	D	D	D
PF3D7_0312000	0	D	D	DR	D	D	D
PF3D7_0312100	0	D	D	DR	DR	D	0
PF3D7_0312200	0	0	0	0	D	0	0
PF3D7_0312300	DR	DR	DR	DR	DR	DR	0
PF3D7_0312400	DR	DR	DR	DR	DR	DR	D
PF3D7_0312500	D	DR	DR	DR	DR	0	D
PF3D7_0312800	DR	DR	DR	DR	DR	R	0
PF3D7_0312900	D	D	D	D	D	0	D
PF3D7_0313000	D	R	0	D	D	0	0
PF3D7_0313100	R	DR	DR	DR	DR	D	0
PF3D7_0313200	R	0	D	DR	DR	R	0
PF3D7_0313300	0	0	0	R	0	0	0
PF3D7_0313400	D	D	D	D	D	D	D
PF3D7_0313500	D	DR	D	D	D	0	0
PF3D7_0313600	0	0	D	D	D	D	0
PF3D7_0313700.2	0	0	D	DR	DR	D	0
PF3D7_0313800	0	0	D	D	D	0	0
PF3D7_0314000	DR	D	D	DR	DR	DR	D
PF3D7_0314100.2	R	R	R	DR	R	DR	D
PF3D7_0314300	0	0	D	D	D	D	0
PF3D7_0314400	DR	DR	DR	DR	DR	D	D
PF3D7_0314500	DR	DR	DR	DR	D	0	D
PF3D7_0314600	0	0	D	DR	0	0	0
PF3D7_0314700	R	0	D	0	D	0	0
PF3D7_0314800	0	0	0	0	0	D	0
PF3D7_0314900	R	0	0	0	R	0	0
PF3D7_0315000	0	0	0	DR	0	0	0
PF3D7_0315100	DR	DR	DR	DR	DR	DR	D
PF3D7_0315200	D	D	D	D	D	D	D
PF3D7_0315300	0	0	D	0	D	0	0
PF3D7_0315400	R	DR	D	DR	DR	D	0
PF3D7_0315500	0	0	0	R	DR	0	0
PF3D7_0315600	D	D	D	D	D	D	D
PF3D7_0315800	DR	DR	DR	DR	D	D	D
PF3D7_0315900	R	0	0	0	0	R	0
PF3D7_0316000	R	R	0	0	DR	DR	D
PF3D7_0316100	R	0	D	DR	DR	DR	D
PF3D7_0316200	0	0	0	D	D	D	0
PF3D7_0316300.2	D	D	D	D	D	D	D
PF3D7_0316400	0	0	0	D	D	0	D
PF3D7_0316500	R	R	0	DR	DR	D	0
PF3D7_0316600	DR	DR	DR	DR	DR	DR	D
PF3D7_0316700	DR	DR	DR	DR	DR	DR	D
PF3D7_0316800	DR	DR	DR	DR	DR	DR	D
PF3D7_0316900	DR	DR	DR	DR	DR	DR	D
PF3D7_0317000	DR	DR	DR	DR	DR	DR	D
PF3D7_0317100	0	D	D	D	D	D	D
PF3D7_0317200	R	D	D	DR	DR	DR	D
PF3D7_0317300	DR	DR	DR	D	D	D	D
PF3D7_0317400	R	0	D	DR	DR	DR	D
PF3D7_0317500	R	D	D	D	D	D	D
PF3D7_0317600	DR	DR	DR	DR	DR	DR	D
PF3D7_0317700	D	DR	D	D	D	D	0
PF3D7_0317800	DR	DR	DR	DR	DR	D	0
PF3D7_0317900	0	D	D	DR	D	0	0
PF3D7_0318100	0	0	DR	DR	D	0	0
PF3D7_0318200	DR	DR	DR	DR	DR	D	D
PF3D7_0318300	DR	DR	DR	DR	DR	D	D
PF3D7_0318500	0	0	0	0	0	D	0
PF3D7_0318600	DR	DR	DR	DR	D	D	D
PF3D7_0318700	DR	R	D	0	R	DR	D
PF3D7_0318900	DR	DR	DR	DR	DR	DR	0
PF3D7_0319000	R	0	D	DR	DR	DR	0
PF3D7_0319100	DR	D	D	DR	DR	DR	D
PF3D7_0319200	DR	DR	DR	DR	D	D	D
PF3D7_0319300	DR	DR	DR	DR	D	D	D
PF3D7_0319400	0	0	D	DR	DR	D	D
PF3D7_0319500	DR	DR	DR	DR	D	D	D
PF3D7_0319600	DR	DR	DR	DR	DR	DR	D
PF3D7_0319700	DR	DR	DR	DR	0	D	D
PF3D7_0319900	DR	DR	DR	DR	DR	DR	D
PF3D7_0320000	R	R	R	R	D	0	0
PF3D7_0320100	DR	DR	DR	DR	DR	DR	D
PF3D7_0320200	0	D	D	D	D	D	0
PF3D7_0320300	DR	DR	DR	DR	DR	DR	D
PF3D7_0320500	R	DR	DR	DR	DR	DR	D
PF3D7_0320600	R	0	0	DR	DR	DR	0
PF3D7_0320700	R	D	D	DR	DR	DR	0
PF3D7_0320800	R	DR	D	DR	DR	DR	D
PF3D7_0320900	DR	DR	DR	DR	DR	DR	D
PF3D7_0321000	D	D	D	D	D	D	D
PF3D7_0321100	0	0	0	D	DR	D	0
PF3D7_0321200	D	D	D	DR	DR	DR	D
PF3D7_0321400	R	0	0	R	DR	DR	0
PF3D7_0321500	DR	D	D	DR	DR	D	D
PF3D7_0321600	DR	D	DR	DR	DR	DR	0
PF3D7_0321800	DR	DR	DR	D	D	D	D
PF3D7_0321900	DR	DR	DR	DR	DR	D	D
PF3D7_0322000	DR	DR	DR	DR	DR	DR	D
PF3D7_0322100	DR	DR	DR	DR	D	D	D
PF3D7_0322300	DR	D	D	DR	DR	DR	0
PF3D7_0322400	D	D	D	DR	D	D	D
PF3D7_0322500	0	0	D	DR	DR	DR	0
PF3D7_0322700	D	DR	D	D	D	0	0
PF3D7_0322900	DR	DR	DR	DR	DR	R	0
PF3D7_0323000	0	R	R	R	R	0	0
PF3D7_0323100	0	R	D	DR	D	0	0
PF3D7_0323200	0	D	D	DR	D	D	D
PF3D7_0323300	0	0	0	0	0	D	0
PF3D7_0323400	R	R	0	0	DR	DR	D
PF3D7_0323500	DR	DR	D	DR	DR	DR	D
PF3D7_0323600	0	0	0	R	D	0	0
PF3D7_0323700	DR	DR	DR	D	D	D	D
PF3D7_0323800	R	R	DR	D	0	0	0
PF3D7_0324100	0	D	D	DR	0	0	0
PF3D7_0324400	D	0	0	0	0	0	0
PF3D7_0324600	D	D	D	D	0	0	0
PF3D7_0324700	0	0	0	D	0	0	0
PF3D7_0324800	D	D	D	D	D	D	D
PF3D7_0324900	D	D	D	D	D	D	D
PF3D7_0400100	D	D	D	D	D	D	D
PF3D7_0400200	0	D	D	D	D	D	0
PF3D7_0400400	D	DR	DR	D	D	D	D
PF3D7_0400500	D	D	D	D	D	D	D
PF3D7_0400700	0	0	D	0	0	0	D
PF3D7_0400800	D	D	D	D	D	0	D
PF3D7_0400900	0	0	D	D	D	0	D
PF3D7_0401000	0	D	D	D	D	D	D
PF3D7_0401200	0	D	D	D	D	0	0
PF3D7_0401300	0	0	D	0	0	0	0
PF3D7_0401400	D	0	D	0	D	0	D
PF3D7_0401500	0	0	D	0	D	D	D
PF3D7_0401600.2	DR	DR	DR	DR	DR	DR	D
PF3D7_0401700	0	D	D	DR	D	0	0
PF3D7_0401800	DR	DR	DR	DR	DR	DR	0
PF3D7_0401900	0	0	D	D	D	0	D
PF3D7_0402000	D	D	DR	DR	D	D	D
PF3D7_0402100	DR	DR	R	R	R	DR	D
PF3D7_0402200	0	0	0	0	0	0	D
PF3D7_0402300	R	R	0	0	D	D	D
PF3D7_0402400	DR	DR	DR	DR	DR	DR	D
PF3D7_0402600	0	0	0	D	0	0	D
PF3D7_0402800	0	0	D	0	0	0	0
PF3D7_0402900	R	0	0	0	0	0	0
PF3D7_0403100	0	0	0	0	D	D	0
PF3D7_0403200	D	DR	D	D	D	0	D
PF3D7_0403400	DR	DR	D	D	D	D	D
PF3D7_0403500	D	D	D	DR	DR	D	0
PF3D7_0403600	0	0	D	DR	DR	D	0
PF3D7_0403700	DR	DR	DR	DR	D	D	D
PF3D7_0403800	DR	DR	R	DR	DR	DR	D
PF3D7_0403900	0	0	D	0	D	D	D
PF3D7_0404000	R	R	0	R	R	DR	0
PF3D7_0404400	DR	DR	DR	D	D	D	D
PF3D7_0404600	0	D	R	0	0	0	0
PF3D7_0404700	R	R	0	0	DR	DR	D
PF3D7_0404900	DR	DR	D	DR	DR	DR	D
PF3D7_0405000	DR	DR	DR	DR	DR	D	D
PF3D7_0405100	DR	DR	DR	DR	DR	DR	D
PF3D7_0405200	R	D	D	D	DR	DR	D
PF3D7_0405300	0	D	0	D	D	D	D
PF3D7_0405400	DR	DR	DR	DR	DR	DR	D
PF3D7_0405500	R	R	0	R	0	0	0
PF3D7_0405600	DR	DR	DR	DR	DR	DR	D
PF3D7_0405700	0	0	D	D	D	0	0
PF3D7_0405800	R	0	R	0	0	0	0
PF3D7_0405900	R	R	0	0	DR	DR	D
PF3D7_0406000	D	DR	D	DR	DR	DR	0
PF3D7_0406100	DR	DR	DR	DR	DR	DR	D
PF3D7_0406200	DR	DR	DR	DR	DR	DR	D
PF3D7_0406400	R	R	R	R	R	R	0
PF3D7_0406500	D	D	D	D	D	D	D
PF3D7_0406600	D	0	D	R	0	0	0
PF3D7_0406700	0	0	0	0	R	0	0
PF3D7_0406800	0	0	0	D	D	D	0
PF3D7_0407000	R	R	0	R	0	0	0
PF3D7_0407100	R	R	0	R	0	0	0
PF3D7_0407200	DR	DR	DR	DR	DR	DR	D
PF3D7_0407300	DR	R	R	0	0	0	0
PF3D7_0407400	DR	R	R	R	D	R	0
PF3D7_0407500	D	D	D	D	D	0	0
PF3D7_0407700	0	0	0	0	DR	D	0
PF3D7_0407800	R	R	D	D	DR	DR	D
PF3D7_0407900	DR	DR	D	DR	DR	DR	D
PF3D7_0408000	R	R	0	0	R	R	0
PF3D7_0408100	0	R	0	0	0	0	0
PF3D7_0408300	0	R	R	R	0	0	D
PF3D7_0408400	0	0	D	D	D	0	0
PF3D7_0408500	0	0	D	DR	D	D	0
PF3D7_0408700	D	D	D	D	D	D	D
PF3D7_0408900.2	0	D	D	DR	D	D	0
PF3D7_0409000	0	0	0	D	D	0	0
PF3D7_0409100	DR	DR	DR	DR	DR	DR	D
PF3D7_0409200	DR	DR	DR	DR	DR	DR	D
PF3D7_0409300	DR	DR	DR	DR	D	0	D
PF3D7_0409400	DR	DR	DR	DR	D	D	D
PF3D7_0409500	R	R	0	R	R	R	0
PF3D7_0409600	DR	D	D	DR	DR	D	D
PF3D7_0409700	0	0	D	DR	DR	DR	0
PF3D7_0409800	DR	DR	DR	DR	DR	DR	D
PF3D7_0409900	0	0	0	0	R	D	0
PF3D7_0410000	DR	DR	DR	DR	DR	DR	D
PF3D7_0410300	DR	DR	D	DR	D	D	D
PF3D7_0410400	DR	DR	DR	DR	D	D	D
PF3D7_0410500	0	0	0	D	0	0	0
PF3D7_0410600	DR	DR	DR	DR	DR	DR	D
PF3D7_0410700	0	D	D	D	DR	D	D
PF3D7_0410800	R	DR	D	DR	DR	DR	D
PF3D7_0410900	D	DR	D	D	D	D	0
PF3D7_0411000	DR	DR	DR	R	0	0	D
PF3D7_0411100	R	D	D	R	R	R	0
PF3D7_0411200	0	D	D	D	D	D	0
PF3D7_0411300	0	0	0	0	D	0	0
PF3D7_0411400	D	D	D	DR	D	0	0
PF3D7_0411700	0	D	0	0	0	0	0
PF3D7_0411800	0	0	0	0	D	0	0
PF3D7_0411900	R	0	0	R	DR	0	0
PF3D7_0412000	R	0	D	DR	DR	D	0
PF3D7_0412100	0	0	D	DR	D	0	0
PF3D7_0412200	0	0	0	R	0	0	0
PF3D7_0412300	0	0	0	0	R	0	0
PF3D7_0412400	D	D	DR	D	0	D	D
PF3D7_0412600	0	D	0	D	D	0	0
PF3D7_0412700	DR	DR	DR	DR	D	0	D
PF3D7_0412900	D	D	D	0	0	0	0
PF3D7_0413100	D	D	D	D	0	0	D
PF3D7_0413200	D	0	0	0	D	0	D
PF3D7_0413300	0	D	D	D	0	D	D
PF3D7_0413400	0	0	0	0	0	D	0
PF3D7_0413500	DR	0	D	DR	DR	DR	D
PF3D7_0413600	DR	DR	DR	DR	DR	DR	D
PF3D7_0413700	DR	D	D	DR	DR	DR	D
PF3D7_0413900	R	DR	DR	DR	DR	DR	0
PF3D7_0414000	0	0	D	DR	D	D	D
PF3D7_0414100	0	0	0	R	0	0	0
PF3D7_0414200.2	R	0	0	R	R	R	0
PF3D7_0414300	R	R	R	R	R	R	0
PF3D7_0414500	D	D	0	0	D	0	D
PF3D7_0414600	R	0	D	D	DR	DR	0
PF3D7_0414700	0	0	D	DR	DR	DR	0
PF3D7_0414800	R	0	0	0	0	0	D
PF3D7_0414900	DR	R	DR	DR	DR	DR	D
PF3D7_0415000	DR	DR	DR	DR	DR	R	0
PF3D7_0415100	DR	DR	0	DR	D	D	D
PF3D7_0415200	0	0	D	D	D	D	0
PF3D7_0415300	DR	DR	DR	DR	D	D	D
PF3D7_0415400	DR	DR	DR	DR	DR	DR	D
PF3D7_0415500	DR	DR	DR	DR	DR	DR	D
PF3D7_0415600	D	D	D	DR	D	D	D
PF3D7_0415700	R	D	D	DR	DR	DR	D
PF3D7_0415800	R	R	0	0	R	R	D
PF3D7_0415900	DR	DR	DR	DR	DR	DR	D
PF3D7_0416000	DR	D	D	DR	DR	D	D
PF3D7_0416100	R	0	0	DR	DR	DR	0
PF3D7_0416200	D	DR	D	D	D	D	D
PF3D7_0416300	0	0	0	D	D	0	0
PF3D7_0416400	R	D	D	DR	DR	D	D
PF3D7_0416500	R	R	0	DR	DR	DR	0
PF3D7_0416600	R	0	0	DR	DR	R	0
PF3D7_0416700	R	R	0	0	R	0	0
PF3D7_0416800	DR	DR	DR	DR	DR	DR	D
PF3D7_0416900	D	D	D	D	D	D	D
PF3D7_0417000	0	0	0	D	0	0	0
PF3D7_0417200	R	0	D	DR	DR	R	0
PF3D7_0417300	DR	DR	DR	DR	D	D	D
PF3D7_0417400	D	D	D	D	D	D	D
PF3D7_0417500	DR	D	D	DR	DR	DR	D
PF3D7_0417600	0	0	0	D	D	D	0
PF3D7_0417800	D	D	DR	DR	D	D	0
PF3D7_0418100	DR	DR	DR	D	D	D	D
PF3D7_0418200	DR	DR	DR	DR	DR	DR	D
PF3D7_0418300	DR	DR	DR	DR	DR	DR	D
PF3D7_0418400	0	D	0	D	0	0	0
PF3D7_0418500	DR	DR	D	DR	DR	DR	0
PF3D7_0418600	0	0	0	D	D	D	D
PF3D7_0418700	DR	DR	DR	DR	D	D	D
PF3D7_0418800	0	D	0	D	0	0	D
PF3D7_0418900	0	0	D	DR	D	0	0
PF3D7_0419000	0	D	0	0	0	0	0
PF3D7_0419100	0	0	0	R	R	0	D
PF3D7_0419200	DR	DR	DR	DR	DR	DR	D
PF3D7_0419300	R	0	D	DR	DR	DR	0
PF3D7_0419400	DR	0	D	D	DR	D	D
PF3D7_0419500	DR	R	DR	R	R	0	0
PF3D7_0419600	DR	DR	DR	DR	DR	DR	D
PF3D7_0419700	DR	DR	0	D	DR	DR	D
PF3D7_0419800	DR	DR	DR	DR	DR	DR	D
PF3D7_0419900	D	DR	DR	D	D	D	D
PF3D7_0420000	D	DR	DR	D	D	0	D
PF3D7_0420100	DR	DR	DR	DR	D	D	D
PF3D7_0420300	DR	DR	DR	D	D	DR	D
PF3D7_0420400	D	D	D	DR	DR	D	D
PF3D7_0420500	0	0	0	0	R	0	0
PF3D7_0420700	0	0	R	0	0	0	0
PF3D7_0421100	D	D	D	D	D	D	D
PF3D7_0421200	0	0	0	0	0	0	D
PF3D7_0421300	D	D	D	D	D	0	D
PF3D7_0421500	0	D	D	D	D	D	D
PF3D7_0422000	D	D	DR	DR	DR	DR	0
PF3D7_0422100	D	DR	DR	DR	DR	DR	0
PF3D7_0422200	0	0	0	D	D	0	0
PF3D7_0422300	DR	DR	DR	DR	DR	DR	D
PF3D7_0422400	DR	DR	DR	DR	DR	DR	D
PF3D7_0422500	DR	DR	DR	D	D	D	D
PF3D7_0422700	DR	DR	DR	DR	DR	0	D
PF3D7_0422800	D	D	D	DR	DR	DR	D
PF3D7_0422900	0	0	0	R	0	0	0
PF3D7_0423100	DR	DR	D	DR	DR	D	D
PF3D7_0423200	DR	R	DR	DR	R	R	0
PF3D7_0423300	0	0	0	D	DR	DR	D
PF3D7_0423400	R	R	0	0	DR	DR	0
PF3D7_0423500	DR	DR	DR	DR	DR	DR	D
PF3D7_0423600	DR	DR	DR	DR	D	D	D
PF3D7_0423700	DR	DR	DR	DR	DR	DR	D
PF3D7_0423800	R	R	0	DR	DR	DR	D
PF3D7_0423900	DR	DR	D	0	DR	DR	D
PF3D7_0424000	D	D	D	DR	D	D	D
PF3D7_0424100	R	R	0	0	DR	DR	D
PF3D7_0424200	R	R	0	0	0	D	D
PF3D7_0424300	R	0	0	0	D	DR	D
PF3D7_0424500	DR	DR	DR	R	D	DR	D
PF3D7_0424600	DR	DR	DR	DR	DR	DR	D
PF3D7_0424700	DR	DR	DR	DR	D	D	D
PF3D7_0424800	DR	R	0	0	0	0	D
PF3D7_0424900	DR	R	R	0	0	0	0
PF3D7_0425000	0	0	0	0	D	0	D
PF3D7_0425100	R	R	0	0	0	0	0
PF3D7_0425200	DR	D	0	0	D	D	D
PF3D7_0425400	0	0	0	0	0	0	D
PF3D7_0425500	0	0	0	0	D	0	0
PF3D7_0425600	0	D	D	0	0	0	D
PF3D7_0425700	0	D	0	0	0	0	D
PF3D7_0425800	D	D	D	D	D	D	D
PF3D7_0425900	D	0	D	DR	DR	DR	0
PF3D7_0426000	D	D	D	D	D	D	D
PF3D7_0500100	D	D	D	D	D	D	D
PF3D7_0500300	0	0	0	0	0	0	D
PF3D7_0500400	0	0	0	D	0	0	D
PF3D7_0500500	0	0	0	0	0	D	0
PF3D7_0500600	0	0	0	D	0	0	0
PF3D7_0500700	D	0	D	D	D	0	0
PF3D7_0500800	D	D	D	DR	D	D	0
PF3D7_0500900	D	0	0	0	DR	D	D
PF3D7_0501000	DR	DR	DR	DR	DR	DR	D
PF3D7_0501100.2	DR	DR	DR	DR	DR	DR	D
PF3D7_0501200	DR	DR	DR	DR	DR	DR	D
PF3D7_0501300	DR	DR	DR	DR	DR	DR	D
PF3D7_0501400	DR	DR	DR	DR	D	DR	D
PF3D7_0501500	R	R	0	DR	DR	DR	D
PF3D7_0501600	DR	R	DR	DR	DR	DR	D
PF3D7_0501800	R	0	D	DR	DR	D	0
PF3D7_0501900	0	0	0	R	0	0	0
PF3D7_0502000	DR	DR	DR	DR	DR	D	0
PF3D7_0502100	0	0	0	R	R	0	0
PF3D7_0502200	DR	DR	DR	DR	DR	DR	0
PF3D7_0502400	DR	DR	DR	R	0	0	D
PF3D7_0502500	0	0	0	0	0	0	D
PF3D7_0502700	0	0	D	D	D	0	0
PF3D7_0502800	R	R	R	R	R	R	0
PF3D7_0502900	D	DR	DR	DR	DR	D	0
PF3D7_0503000	DR	D	D	DR	DR	D	D
PF3D7_0503100	D	0	D	DR	DR	D	0
PF3D7_0503200	R	0	0	D	0	D	0
PF3D7_0503300	DR	DR	DR	DR	DR	D	D
PF3D7_0503400	DR	DR	DR	DR	DR	DR	D
PF3D7_0503500	D	D	D	D	D	D	D
PF3D7_0503600	R	R	0	0	DR	DR	D
PF3D7_0503800	DR	DR	DR	DR	DR	R	D
PF3D7_0504000	D	D	D	DR	D	D	0
PF3D7_0504100	0	0	0	0	R	D	0
PF3D7_0504200	0	0	D	DR	DR	DR	D
PF3D7_0504400	DR	D	D	DR	DR	DR	D
PF3D7_0504500	D	D	D	D	D	DR	D
PF3D7_0504600	R	0	D	DR	DR	DR	D
PF3D7_0504800	0	0	D	D	D	D	0
PF3D7_0504900	D	D	D	DR	DR	DR	D
PF3D7_0505000	D	D	D	D	D	D	D
PF3D7_0505200	0	0	0	R	R	R	0
PF3D7_0505300	0	0	0	D	D	D	D
PF3D7_0505400	R	0	D	DR	DR	D	0
PF3D7_0505500	DR	D	D	DR	DR	DR	D
PF3D7_0505600	R	R	R	R	0	0	0
PF3D7_0505700	0	R	0	D	D	D	0
PF3D7_0505800	DR	DR	DR	DR	DR	DR	D
PF3D7_0505900	R	R	DR	DR	D	0	0
PF3D7_0506000	DR	DR	DR	DR	DR	DR	D
PF3D7_0506100	DR	DR	DR	DR	DR	R	D
PF3D7_0506200	R	R	0	0	0	0	0
PF3D7_0506300	R	D	D	D	D	0	D
PF3D7_0506400	D	0	0	0	0	0	0
PF3D7_0506500	D	D	D	D	D	D	D
PF3D7_0506700	DR	DR	DR	DR	DR	D	0
PF3D7_0506800	DR	DR	DR	DR	DR	D	D
PF3D7_0506900	DR	DR	D	DR	DR	DR	D
PF3D7_0507000	0	0	D	DR	D	D	0
PF3D7_0507100	DR	DR	DR	DR	DR	DR	D
PF3D7_0507200	DR	D	D	DR	DR	DR	D
PF3D7_0507300	0	D	D	0	D	D	D
PF3D7_0507400	R	R	0	R	DR	DR	D
PF3D7_0507500	DR	R	D	D	DR	DR	D
PF3D7_0507600	DR	DR	DR	DR	DR	DR	D
PF3D7_0507700	DR	DR	DR	DR	DR	DR	0
PF3D7_0507800	DR	DR	DR	DR	D	D	D
PF3D7_0507900	DR	R	R	R	R	R	0
PF3D7_0508000	R	R	0	DR	DR	DR	D
PF3D7_0508100	R	0	D	DR	DR	DR	D
PF3D7_0508200	0	D	D	D	DR	D	D
PF3D7_0508300	DR	DR	DR	DR	DR	DR	0
PF3D7_0508400	0	0	0	0	0	D	D
PF3D7_0508500	0	D	D	D	DR	D	0
PF3D7_0508600	DR	DR	DR	DR	DR	D	D
PF3D7_0508700	R	R	R	0	D	D	0
PF3D7_0508800	R	0	0	D	DR	0	0
PF3D7_0508900	0	0	0	D	D	D	D
PF3D7_0509000	R	D	DR	DR	DR	DR	0
PF3D7_0509100	0	0	D	D	D	D	0
PF3D7_0509300	D	0	D	D	DR	0	D
PF3D7_0509400	DR	DR	DR	DR	D	D	D
PF3D7_0509500	0	0	0	R	0	0	0
PF3D7_0509600	D	D	D	DR	DR	D	D
PF3D7_0509800	DR	DR	DR	DR	DR	DR	D
PF3D7_0509900	0	0	0	R	0	0	0
PF3D7_0510100	R	0	D	D	D	D	D
PF3D7_0510200	DR	DR	D	DR	DR	D	D
PF3D7_0510400	0	R	D	R	0	0	0
PF3D7_0510500	DR	DR	DR	DR	DR	D	D
PF3D7_0510800	D	D	D	D	D	D	D
PF3D7_0511000	DR	DR	DR	DR	DR	DR	D
PF3D7_0511100	0	0	D	0	0	0	0
PF3D7_0511200	DR	0	D	DR	DR	DR	0
PF3D7_0511300	0	0	D	D	0	0	0
PF3D7_0511500	D	DR	DR	D	D	0	D
PF3D7_0511600	0	0	0	D	DR	DR	0
PF3D7_0511700	D	DR	D	DR	DR	DR	0
PF3D7_0511800	DR	DR	DR	DR	DR	DR	D
PF3D7_0511900	D	D	D	D	0	0	0
PF3D7_0512000	DR	DR	DR	DR	D	D	0
PF3D7_0512100	0	0	0	R	0	0	0
PF3D7_0512200	D	D	DR	DR	D	0	0
PF3D7_0512300	R	R	R	R	R	0	0
PF3D7_0512400	0	0	D	0	0	0	0
PF3D7_0512500	D	0	D	D	D	0	0
PF3D7_0512600	DR	DR	DR	DR	DR	DR	D
PF3D7_0512700	D	DR	DR	DR	DR	D	0
PF3D7_0512900	0	0	D	R	DR	0	0
PF3D7_0513000	0	D	D	DR	D	D	D
PF3D7_0513100	R	R	0	R	R	R	0
PF3D7_0513200	D	DR	D	D	D	D	D
PF3D7_0513300	DR	DR	DR	DR	DR	DR	D
PF3D7_0513400	D	D	D	DR	D	0	0
PF3D7_0513600	R	D	D	DR	DR	D	D
PF3D7_0513800	R	0	D	DR	DR	D	D
PF3D7_0513900	DR	D	D	DR	DR	0	D
PF3D7_0514000	0	0	0	D	D	D	D
PF3D7_0514100	0	0	0	D	DR	D	0
PF3D7_0514200	D	0	0	R	DR	D	0
PF3D7_0514300	0	0	D	DR	D	0	0
PF3D7_0514500	D	D	0	D	D	D	0
PF3D7_0514600	D	D	D	DR	D	DR	D
PF3D7_0514800	R	R	0	R	0	0	0
PF3D7_0514900	R	R	DR	DR	R	0	0
PF3D7_0515000	DR	DR	DR	DR	DR	D	D
PF3D7_0515100	D	0	D	D	D	D	0
PF3D7_0515200	0	0	0	R	D	0	0
PF3D7_0515300	D	D	D	D	DR	D	D
PF3D7_0515400	R	0	0	0	D	D	D
PF3D7_0515500	0	D	D	D	D	D	D
PF3D7_0515700	R	R	DR	DR	DR	DR	D
PF3D7_0515800	DR	DR	DR	DR	DR	DR	0
PF3D7_0515900	DR	DR	DR	DR	DR	DR	D
PF3D7_0516000	0	0	D	D	D	0	0
PF3D7_0516100	0	D	D	D	D	D	0
PF3D7_0516200	DR	DR	DR	DR	DR	DR	D
PF3D7_0516300	DR	DR	DR	DR	D	D	D
PF3D7_0516400	DR	DR	D	DR	D	D	0
PF3D7_0516500	D	D	D	D	D	D	D
PF3D7_0516600	0	0	D	D	D	0	0
PF3D7_0516700	R	R	R	R	R	R	0
PF3D7_0516800	0	D	D	D	D	D	0
PF3D7_0516900	DR	DR	DR	DR	DR	DR	D
PF3D7_0517000	DR	DR	DR	DR	DR	DR	D
PF3D7_0517100	D	D	D	R	0	D	D
PF3D7_0517200	D	D	D	0	0	D	D
PF3D7_0517300	DR	DR	DR	DR	DR	DR	D
PF3D7_0517400	DR	D	D	DR	DR	D	D
PF3D7_0517500	0	D	D	0	D	0	D
PF3D7_0517700	DR	DR	DR	DR	DR	DR	D
PF3D7_0517800	0	0	0	0	D	0	D
PF3D7_0517900	DR	D	D	R	DR	DR	D
PF3D7_0518000	DR	DR	DR	DR	D	D	D
PF3D7_0518100	D	D	D	DR	D	D	D
PF3D7_0518200	R	0	0	R	R	R	0
PF3D7_0518300	DR	DR	DR	DR	DR	DR	D
PF3D7_0518400	0	0	D	0	D	0	0
PF3D7_0518500	DR	DR	DR	DR	D	D	D
PF3D7_0518600	0	0	D	D	D	D	0
PF3D7_0518700	0	D	0	0	0	0	0
PF3D7_0518800	0	0	0	D	0	0	0
PF3D7_0519000	0	0	D	DR	D	0	0
PF3D7_0519100	R	0	D	DR	DR	DR	0
PF3D7_0519200	DR	DR	DR	DR	DR	DR	D
PF3D7_0519300	D	D	D	DR	D	D	D
PF3D7_0519400	DR	DR	DR	DR	DR	DR	D
PF3D7_0519600	R	DR	DR	DR	DR	0	0
PF3D7_0519700	R	DR	R	DR	R	R	0
PF3D7_0519800	DR	DR	DR	DR	D	D	D
PF3D7_0519900	0	D	D	DR	D	D	0
PF3D7_0520000	DR	DR	DR	DR	DR	DR	D
PF3D7_0520100	D	DR	DR	DR	D	D	0
PF3D7_0520200	R	R	R	DR	R	R	0
PF3D7_0520300	DR	DR	DR	DR	DR	DR	D
PF3D7_0520400	R	0	D	DR	DR	D	0
PF3D7_0520500	R	D	D	DR	DR	DR	0
PF3D7_0520600	DR	DR	DR	DR	DR	DR	D
PF3D7_0520700	DR	DR	DR	DR	D	0	0
PF3D7_0520800	0	0	0	R	D	0	0
PF3D7_0520900	DR	DR	DR	DR	DR	DR	D
PF3D7_0521000	DR	DR	DR	DR	D	D	D
PF3D7_0521100	0	0	0	0	D	D	0
PF3D7_0521200	0	0	0	0	D	0	0
PF3D7_0521300	R	R	R	0	0	0	0
PF3D7_0521400	0	0	0	R	0	0	0
PF3D7_0521500	0	D	D	D	D	0	0
PF3D7_0521700	DR	DR	D	DR	D	0	D
PF3D7_0522000	R	R	DR	DR	R	0	0
PF3D7_0522100	R	R	0	0	R	0	0
PF3D7_0522200	DR	DR	R	DR	DR	R	0
PF3D7_0522300	DR	DR	DR	DR	D	D	D
PF3D7_0522400	D	0	D	D	D	D	D
PF3D7_0522500	0	0	0	DR	DR	D	0
PF3D7_0522600	R	DR	D	DR	DR	DR	D
PF3D7_0522700	0	0	0	DR	0	0	0
PF3D7_0522800	D	DR	DR	DR	0	0	0
PF3D7_0522900	0	0	0	0	D	0	0
PF3D7_0523000	DR	DR	DR	DR	DR	DR	D
PF3D7_0523100	DR	DR	DR	DR	DR	DR	D
PF3D7_0523200	D	D	D	DR	D	0	0
PF3D7_0523300	D	D	D	DR	DR	DR	D
PF3D7_0523400	DR	DR	DR	DR	DR	DR	D
PF3D7_0523600	0	0	0	R	R	0	0
PF3D7_0523800	DR	R	R	R	0	0	0
PF3D7_0523900	DR	DR	DR	DR	DR	DR	D
PF3D7_0524000	DR	DR	DR	DR	DR	DR	D
PF3D7_0524100	R	R	0	0	0	0	0
PF3D7_0524200	0	D	D	D	D	D	D
PF3D7_0524300	DR	DR	DR	DR	D	D	0
PF3D7_0524400	DR	DR	DR	DR	DR	DR	D
PF3D7_0524500	R	DR	DR	DR	D	0	0
PF3D7_0524600	R	D	0	R	DR	D	0
PF3D7_0524700	D	DR	DR	DR	DR	DR	D
PF3D7_0524800	0	R	D	R	R	R	0
PF3D7_0524900	DR	DR	DR	DR	D	D	D
PF3D7_0525000	DR	DR	DR	DR	DR	D	D
PF3D7_0525100	DR	DR	DR	DR	DR	DR	D
PF3D7_0525200	0	D	D	D	D	D	D
PF3D7_0525300	0	R	0	D	DR	DR	D
PF3D7_0525400	R	0	D	DR	DR	0	0
PF3D7_0525500	D	DR	D	DR	D	D	0
PF3D7_0525600	0	D	D	DR	D	D	D
PF3D7_0525700	R	D	D	DR	DR	DR	D
PF3D7_0525800	DR	DR	DR	DR	DR	DR	D
PF3D7_0525900	0	0	0	0	0	0	D
PF3D7_0526000	0	0	D	D	D	0	0
PF3D7_0526100	0	0	0	R	0	0	0
PF3D7_0526200.2	R	D	D	DR	DR	DR	D
PF3D7_0526300	DR	DR	DR	DR	DR	DR	D
PF3D7_0526400	R	0	0	R	DR	R	0
PF3D7_0526500	DR	DR	DR	DR	D	D	D
PF3D7_0526700	0	0	D	D	D	0	0
PF3D7_0526800	DR	DR	DR	DR	DR	DR	D
PF3D7_0526900	DR	R	R	R	DR	R	0
PF3D7_0527000	DR	DR	DR	DR	DR	DR	D
PF3D7_0527100	DR	DR	DR	DR	DR	DR	D
PF3D7_0527200	DR	DR	DR	DR	DR	DR	0
PF3D7_0527300	DR	DR	DR	DR	DR	DR	D
PF3D7_0527400	DR	DR	DR	DR	DR	D	D
PF3D7_0527500	DR	DR	DR	DR	DR	D	D
PF3D7_0527600	DR	DR	DR	DR	DR	D	0
PF3D7_0527900	DR	DR	DR	DR	D	D	D
PF3D7_0528000	DR	DR	DR	DR	DR	R	0
PF3D7_0528100	DR	DR	DR	DR	DR	DR	D
PF3D7_0528200	DR	DR	DR	DR	DR	DR	0
PF3D7_0528300	R	R	0	0	DR	DR	0
PF3D7_0528400	DR	R	0	D	DR	DR	D
PF3D7_0528500	0	0	0	DR	DR	D	0
PF3D7_0528600	DR	DR	D	DR	D	D	D
PF3D7_0528700	R	R	R	DR	0	R	0
PF3D7_0528800	DR	DR	DR	DR	D	0	D
PF3D7_0528900	0	0	D	0	0	D	0
PF3D7_0529000	DR	DR	DR	DR	DR	DR	D
PF3D7_0529100	R	0	0	R	0	0	0
PF3D7_0529200	0	0	D	D	D	D	D
PF3D7_0529300	0	0	D	R	DR	0	0
PF3D7_0529400.2	R	0	D	DR	DR	D	0
PF3D7_0529500	R	R	R	R	0	0	0
PF3D7_0529800	0	0	D	D	D	D	0
PF3D7_0529900	DR	DR	DR	DR	DR	DR	D
PF3D7_0530000	R	R	0	R	R	R	0
PF3D7_0530100	R	R	0	R	R	R	0
PF3D7_0530200	R	D	D	DR	DR	DR	D
PF3D7_0530300	0	0	0	D	D	D	0
PF3D7_0530400	0	0	D	D	0	0	0
PF3D7_0530600	DR	DR	DR	DR	D	D	0
PF3D7_0530700	D	DR	D	DR	D	0	D
PF3D7_0530800	D	0	D	D	D	D	D
PF3D7_0530900	0	0	0	0	D	D	0
PF3D7_0531000	0	R	0	R	0	0	0
PF3D7_0531100	0	0	0	D	D	D	0
PF3D7_0531300	0	0	0	0	D	D	0
PF3D7_0531400	R	R	R	R	D	0	D
PF3D7_0532100	DR	DR	DR	DR	DR	DR	D
PF3D7_0532200	0	D	0	0	D	D	0
PF3D7_0532300	DR	DR	DR	DR	DR	DR	D
PF3D7_0532400	DR	DR	DR	DR	DR	D	0
PF3D7_0532500	0	0	R	0	0	0	0
PF3D7_0532600	DR	D	DR	DR	D	0	0
PF3D7_0532900	0	0	D	D	D	D	0
PF3D7_0533000	0	D	D	0	0	0	0
PF3D7_0533100	0	D	D	0	0	0	0
PF3D7_0600100	0	0	D	0	0	0	0
PF3D7_0600200	DR	DR	DR	D	0	0	0
PF3D7_0600300	0	0	D	D	D	D	D
PF3D7_0600500	0	0	D	0	D	D	D
PF3D7_0600600	0	D	0	0	0	D	D
PF3D7_0600700	D	0	D	D	D	D	D
PF3D7_0601200	0	R	R	R	R	0	0
PF3D7_0601700	D	D	D	D	0	0	0
PF3D7_0601900	R	R	R	R	R	R	0
PF3D7_0602000	0	D	D	D	D	D	D
PF3D7_0602100	DR	DR	DR	DR	0	0	0
PF3D7_0602200	R	R	R	R	R	R	0
PF3D7_0602400	D	D	D	DR	D	D	D
PF3D7_0602500	D	D	D	DR	D	D	D
PF3D7_0602600	R	DR	DR	DR	0	0	0
PF3D7_0602800	D	0	D	D	D	D	D
PF3D7_0602900	DR	R	R	D	DR	D	0
PF3D7_0603000	DR	DR	DR	DR	DR	D	D
PF3D7_0603100	0	0	D	DR	DR	D	D
PF3D7_0603200	0	D	D	DR	DR	D	D
PF3D7_0603300	D	DR	DR	DR	D	0	0
PF3D7_0603400	0	0	0	D	0	0	0
PF3D7_0603500	R	D	D	DR	DR	D	D
PF3D7_0603600	0	D	D	D	D	D	0
PF3D7_0603700	0	0	D	D	D	0	0
PF3D7_0604100	R	R	0	0	DR	DR	0
PF3D7_0604200	D	D	D	DR	D	0	0
PF3D7_0604300	0	0	0	R	0	0	0
PF3D7_0604400	0	0	D	D	0	0	0
PF3D7_0604500	DR	DR	DR	D	D	D	D
PF3D7_0604600	0	0	D	0	0	0	0
PF3D7_0604700	0	D	D	DR	DR	D	0
PF3D7_0604800	0	0	D	D	0	0	0
PF3D7_0604900	0	D	D	DR	D	D	D
PF3D7_0605000	0	0	D	DR	D	D	0
PF3D7_0605100	DR	DR	DR	DR	DR	DR	D
PF3D7_0605200	0	0	D	DR	DR	DR	0
PF3D7_0605300	R	D	D	DR	DR	D	D
PF3D7_0605400	0	0	0	R	R	0	0
PF3D7_0605500	0	D	D	DR	DR	D	0
PF3D7_0605700	0	0	0	0	D	0	0
PF3D7_0605800	0	0	D	D	D	D	D
PF3D7_0605900	DR	DR	DR	DR	DR	DR	D
PF3D7_0606000	DR	DR	DR	DR	DR	DR	D
PF3D7_0606100	DR	DR	DR	DR	D	D	D
PF3D7_0606200	DR	DR	DR	DR	DR	DR	D
PF3D7_0606300	R	R	R	R	R	R	0
PF3D7_0606500	DR	DR	DR	DR	D	D	D
PF3D7_0606600	DR	DR	DR	D	D	D	D
PF3D7_0606700	DR	DR	DR	DR	DR	DR	D
PF3D7_0606800	R	0	0	R	R	R	0
PF3D7_0606900	R	R	R	R	R	R	0
PF3D7_0607000	DR	DR	DR	DR	D	D	D
PF3D7_0607200	0	0	0	R	0	0	0
PF3D7_0607300	0	0	D	D	D	0	0
PF3D7_0607400	R	R	R	R	R	R	0
PF3D7_0607500	0	0	0	R	R	R	0
PF3D7_0607600	R	0	0	0	DR	D	0
PF3D7_0607700	R	0	0	D	DR	D	0
PF3D7_0607800	0	0	D	D	D	0	0
PF3D7_0607900	0	0	D	D	D	D	D
PF3D7_0608000	D	D	D	DR	DR	D	0
PF3D7_0608100	D	D	D	DR	D	D	D
PF3D7_0608310	D	D	D	D	D	D	0
PF3D7_0608400	0	0	0	DR	DR	D	D
PF3D7_0608500	DR	DR	DR	DR	DR	DR	D
PF3D7_0608700	DR	DR	DR	DR	DR	DR	D
PF3D7_0608800	DR	DR	DR	DR	DR	DR	D
PF3D7_0608900	0	0	D	D	DR	D	0
PF3D7_0609000	D	DR	DR	D	D	D	D
PF3D7_0609100	DR	DR	DR	DR	DR	DR	D
PF3D7_0609200	D	DR	D	DR	DR	D	0
PF3D7_0609300	0	0	D	0	D	0	0
PF3D7_0609400	0	0	0	R	0	0	0
PF3D7_0609700	DR	DR	D	D	D	D	D
PF3D7_0609800	R	R	0	R	R	R	0
PF3D7_0610000	0	0	0	R	R	0	0
PF3D7_0610100	DR	DR	DR	DR	D	D	D
PF3D7_0610400	DR	DR	DR	DR	DR	DR	D
PF3D7_0610500	0	R	R	R	0	0	0
PF3D7_0610600	D	D	D	DR	DR	D	D
PF3D7_0610700	DR	R	R	R	DR	R	0
PF3D7_0610800	DR	DR	DR	DR	DR	DR	D
PF3D7_0610900	DR	DR	DR	DR	D	D	D
PF3D7_0611000	0	0	0	DR	DR	DR	0
PF3D7_0611100	0	0	0	R	0	0	0
PF3D7_0611200	0	0	0	R	R	0	0
PF3D7_0611300	0	0	0	R	R	0	0
PF3D7_0611400	DR	R	R	DR	R	0	0
PF3D7_0611600	R	0	0	R	R	R	0
PF3D7_0611700	R	R	R	R	R	R	0
PF3D7_0611800	R	R	R	0	D	0	0
PF3D7_0611900	R	R	0	R	R	R	0
PF3D7_0612000	0	0	0	R	R	R	0
PF3D7_0612100	R	R	R	R	R	R	0
PF3D7_0612200	0	D	D	D	D	D	D
PF3D7_0612400	0	0	0	0	R	0	0
PF3D7_0612600	D	D	D	DR	DR	DR	0
PF3D7_0612700	DR	DR	D	DR	DR	DR	D
PF3D7_0612800	R	R	0	R	R	0	0
PF3D7_0612900	DR	DR	DR	DR	DR	DR	D
PF3D7_0613000.3	R	0	0	R	R	0	0
PF3D7_0613100	R	R	R	R	R	0	0
PF3D7_0613200	0	0	0	0	R	0	0
PF3D7_0613300	R	0	0	0	R	DR	0
PF3D7_0613400	DR	0	D	DR	DR	DR	D
PF3D7_0613500	0	0	D	D	0	0	0
PF3D7_0613600	0	0	0	0	R	R	D
PF3D7_0613700	DR	D	DR	DR	DR	DR	D
PF3D7_0613800	R	D	D	D	DR	D	D
PF3D7_0613900	R	0	0	D	DR	DR	D
PF3D7_0614000	R	DR	D	DR	DR	DR	0
PF3D7_0614100	R	0	0	0	R	0	0
PF3D7_0614200	0	0	D	DR	D	D	D
PF3D7_0614300	DR	DR	DR	DR	DR	DR	D
PF3D7_0614400	DR	DR	DR	DR	DR	DR	D
PF3D7_0614500	DR	DR	DR	DR	DR	DR	D
PF3D7_0614700	0	0	0	0	R	0	0
PF3D7_0614800	0	0	D	DR	D	D	0
PF3D7_0614900	0	0	D	DR	DR	DR	D
PF3D7_0615000	DR	DR	DR	DR	D	0	D
PF3D7_0615100	0	0	0	0	0	0	D
PF3D7_0615300	0	D	D	DR	DR	D	0
PF3D7_0615400	D	D	D	D	D	D	D
PF3D7_0615500	R	0	D	DR	DR	DR	D
PF3D7_0615600	DR	DR	D	DR	D	D	D
PF3D7_0615700	R	R	R	R	DR	R	0
PF3D7_0615800	0	D	D	D	D	D	D
PF3D7_0615900	D	D	D	D	D	D	0
PF3D7_0616000	0	D	DR	DR	0	D	0
PF3D7_0616100	0	R	R	0	0	0	0
PF3D7_0616200	R	0	D	DR	DR	D	0
PF3D7_0616300	R	R	R	R	0	0	0
PF3D7_0616400	0	D	D	D	D	0	0
PF3D7_0616600	0	0	D	DR	D	D	0
PF3D7_0616700	0	D	D	D	D	0	0
PF3D7_0616800	D	D	DR	DR	DR	DR	D
PF3D7_0616900	D	D	D	D	D	0	D
PF3D7_0617000	R	R	R	R	R	R	0
PF3D7_0617100	DR	DR	DR	DR	DR	D	D
PF3D7_0617200	DR	DR	DR	DR	DR	D	D
PF3D7_0617300	R	0	0	R	R	R	0
PF3D7_0617400	D	D	D	D	D	D	D
PF3D7_0617600	0	0	0	R	0	0	0
PF3D7_0617700	D	0	0	D	0	D	0
PF3D7_0617800	R	R	R	R	R	R	0
PF3D7_0617900	R	R	R	R	R	R	0
PF3D7_0618000	R	R	0	0	DR	DR	D
PF3D7_0618100	0	0	D	DR	D	D	0
PF3D7_0618200	R	R	R	R	R	R	0
PF3D7_0618300	R	R	R	R	R	R	0
PF3D7_0618500	DR	D	D	DR	DR	DR	D
PF3D7_0618600	0	0	0	R	R	0	0
PF3D7_0618700	0	0	0	R	R	0	0
PF3D7_0618900.2	R	0	0	R	R	R	0
PF3D7_0619000.2	D	DR	DR	DR	D	D	0
PF3D7_0619100	0	0	0	DR	R	0	0
PF3D7_0619200	DR	DR	DR	DR	D	D	D
PF3D7_0619400	DR	DR	DR	DR	DR	DR	D
PF3D7_0619500	D	DR	D	DR	DR	D	0
PF3D7_0619900	DR	DR	DR	DR	DR	DR	0
PF3D7_0620100	R	0	0	0	0	0	0
PF3D7_0620300	0	0	0	0	R	R	0
PF3D7_0620400	R	R	0	0	DR	DR	D
PF3D7_0620700	DR	R	D	0	R	R	0
PF3D7_0621000	0	0	0	R	0	0	0
PF3D7_0621100	R	R	0	0	DR	DR	0
PF3D7_0621200	DR	DR	DR	DR	DR	DR	D
PF3D7_0621300	DR	DR	DR	DR	D	0	D
PF3D7_0621400	0	D	0	D	D	D	0
PF3D7_0621500	DR	R	D	DR	DR	D	0
PF3D7_0621800	R	R	R	R	0	R	0
PF3D7_0621900	DR	DR	DR	DR	DR	DR	D
PF3D7_0622000	0	0	0	R	0	R	0
PF3D7_0622200	DR	DR	DR	DR	D	0	D
PF3D7_0622300	0	D	0	D	0	0	D
PF3D7_0622400	0	0	0	R	0	0	0
PF3D7_0622500	0	D	0	DR	0	0	0
PF3D7_0622700	R	R	0	R	0	0	0
PF3D7_0622800	DR	DR	DR	DR	DR	R	D
PF3D7_0622900	DR	R	R	0	0	0	D
PF3D7_0623000	R	R	R	R	R	R	0
PF3D7_0623100	DR	DR	DR	DR	DR	DR	D
PF3D7_0623200	DR	DR	DR	DR	DR	R	D
PF3D7_0623300	0	0	D	DR	DR	DR	0
PF3D7_0623400	0	0	0	0	0	D	0
PF3D7_0623500	0	D	D	R	R	D	0
PF3D7_0623600	DR	DR	DR	DR	DR	DR	D
PF3D7_0623700	0	0	D	D	D	0	D
PF3D7_0623800	DR	DR	DR	D	D	D	D
PF3D7_0623900	0	0	D	DR	D	0	D
PF3D7_0624000	DR	DR	DR	DR	DR	DR	D
PF3D7_0624100	0	0	D	DR	DR	D	0
PF3D7_0624200	R	0	R	R	R	R	0
PF3D7_0624400	DR	DR	D	DR	DR	D	0
PF3D7_0624500	DR	DR	DR	DR	DR	DR	D
PF3D7_0624600	DR	DR	DR	DR	DR	D	D
PF3D7_0624700	D	D	D	DR	DR	DR	D
PF3D7_0625000.2	0	0	0	D	DR	DR	D
PF3D7_0625100	0	0	0	0	D	0	0
PF3D7_0625300	0	0	D	DR	DR	D	0
PF3D7_0625400	R	R	R	R	R	R	0
PF3D7_0625600	DR	DR	DR	DR	DR	DR	D
PF3D7_0625700	R	R	R	R	R	R	0
PF3D7_0625800	D	0	D	0	D	D	D
PF3D7_0626000	DR	DR	DR	DR	D	0	0
PF3D7_0626100	0	0	D	DR	DR	DR	0
PF3D7_0626200	0	R	0	R	0	0	0
PF3D7_0626300	0	0	0	D	D	D	0
PF3D7_0626400	R	0	0	0	0	0	0
PF3D7_0626700	R	R	R	R	R	R	0
PF3D7_0626800	DR	DR	DR	DR	DR	DR	D
PF3D7_0627100	R	R	R	R	R	R	0
PF3D7_0627200	0	0	0	R	R	0	0
PF3D7_0627300	R	R	R	R	R	R	0
PF3D7_0627400	0	0	R	R	0	0	0
PF3D7_0627500	R	R	R	R	R	R	0
PF3D7_0627700	DR	DR	DR	DR	DR	DR	D
PF3D7_0627800	DR	DR	DR	DR	DR	DR	D
PF3D7_0627900	R	DR	R	R	0	0	0
PF3D7_0628000	0	0	0	R	0	0	D
PF3D7_0628100	0	0	0	D	DR	D	D
PF3D7_0628200	DR	DR	DR	DR	D	D	D
PF3D7_0628300	R	R	R	R	R	R	0
PF3D7_0628400	0	0	D	0	0	0	0
PF3D7_0628600	R	R	R	R	0	0	0
PF3D7_0628700	0	0	0	R	0	0	0
PF3D7_0628800	0	0	0	R	0	0	0
PF3D7_0628900	0	0	0	D	0	D	0
PF3D7_0629000	0	0	0	R	0	0	0
PF3D7_0629100	DR	DR	DR	DR	DR	D	D
PF3D7_0629200	DR	DR	DR	DR	DR	D	D
PF3D7_0629300	0	0	0	0	R	R	0
PF3D7_0629400	R	0	D	DR	D	0	0
PF3D7_0629500	DR	DR	DR	DR	DR	DR	D
PF3D7_0629600	R	R	R	R	R	R	0
PF3D7_0629700	D	D	D	D	D	D	D
PF3D7_0629800	R	DR	R	R	R	0	0
PF3D7_0629900	R	R	R	R	0	0	0
PF3D7_0630100	0	0	0	0	0	R	0
PF3D7_0630300	0	0	0	D	D	D	0
PF3D7_0630400	R	0	0	R	DR	DR	0
PF3D7_0630500	DR	DR	DR	DR	D	0	0
PF3D7_0630600	R	R	0	R	R	R	0
PF3D7_0630700	D	D	D	0	0	0	D
PF3D7_0630800	0	0	0	D	0	0	0
PF3D7_0630900	DR	DR	DR	DR	D	D	D
PF3D7_0631200	D	D	D	D	D	D	D
PF3D7_0631500	0	D	0	0	0	D	0
PF3D7_0631800	0	D	D	D	D	D	D
PF3D7_0631900	D	D	D	D	D	D	D
PF3D7_0632000	0	D	D	0	D	0	0
PF3D7_0632200	0	0	0	0	D	D	0
PF3D7_0632400	0	D	D	D	D	0	D
PF3D7_0632500	D	DR	DR	D	D	0	D
PF3D7_0632700	D	D	D	D	D	D	D
PF3D7_0632800	D	D	D	D	D	D	D
PF3D7_0700800	0	0	R	R	R	0	0
PF3D7_0701600	0	0	R	R	R	0	0
PF3D7_0701900	DR	DR	D	0	0	D	D
PF3D7_0702000	DR	DR	DR	DR	D	DR	D
PF3D7_0702100	DR	DR	R	0	D	DR	D
PF3D7_0702200	DR	DR	DR	DR	DR	DR	D
PF3D7_0702300	DR	DR	R	0	0	0	D
PF3D7_0702400	DR	DR	DR	DR	DR	DR	D
PF3D7_0702500	DR	DR	DR	DR	DR	R	D
PF3D7_0702600	0	0	0	0	0	R	D
PF3D7_0702900	R	R	0	R	R	R	D
PF3D7_0703100	D	R	D	R	0	0	D
PF3D7_0703200	R	0	0	DR	DR	0	0
PF3D7_0703300	0	0	0	R	0	0	0
PF3D7_0703400	0	0	D	D	D	0	0
PF3D7_0703500	DR	DR	DR	DR	DR	DR	D
PF3D7_0703600	0	0	0	R	DR	DR	0
PF3D7_0703700	DR	DR	DR	DR	DR	DR	D
PF3D7_0703900	D	DR	D	D	D	0	0
PF3D7_0704100	0	0	0	D	DR	D	0
PF3D7_0704200	0	R	0	R	0	0	0
PF3D7_0704300	DR	D	D	D	D	D	D
PF3D7_0704400	DR	D	D	DR	DR	DR	D
PF3D7_0704500	DR	D	D	D	DR	D	D
PF3D7_0704600	D	DR	DR	D	D	D	D
PF3D7_0704700	D	R	0	D	DR	0	0
PF3D7_0704800	R	0	D	D	DR	DR	D
PF3D7_0704900	0	0	0	R	R	R	0
PF3D7_0705000	DR	DR	D	D	D	D	D
PF3D7_0705100	R	0	0	0	DR	D	0
PF3D7_0705200	0	D	D	D	D	0	0
PF3D7_0705300	R	0	0	R	DR	0	0
PF3D7_0705400	R	DR	DR	DR	DR	DR	D
PF3D7_0705500	DR	DR	R	D	DR	D	D
PF3D7_0705700	R	R	R	R	R	R	0
PF3D7_0705900	R	R	R	R	R	R	0
PF3D7_0706000	R	R	R	R	R	R	0
PF3D7_0706100	0	0	0	0	R	0	0
PF3D7_0706200	0	0	0	R	R	0	0
PF3D7_0706300	R	R	0	R	R	R	0
PF3D7_0706400	R	R	R	R	R	R	0
PF3D7_0706500	R	R	R	0	0	0	0
PF3D7_0706700	0	0	0	0	D	D	D
PF3D7_0707200	0	0	0	0	R	0	0
PF3D7_0707300	R	R	0	0	R	R	0
PF3D7_0707400	R	R	R	R	0	0	0
PF3D7_0707500	DR	R	0	0	0	R	D
PF3D7_0707600	DR	DR	DR	DR	D	D	D
PF3D7_0707700	DR	DR	DR	DR	DR	DR	D
PF3D7_0707800	0	0	0	R	0	0	0
PF3D7_0707900	DR	DR	DR	DR	D	D	D
PF3D7_0708000	0	D	D	DR	D	D	0
PF3D7_0708100	DR	DR	DR	DR	DR	R	D
PF3D7_0708200	D	D	D	D	D	D	D
PF3D7_0708300	DR	DR	DR	DR	0	0	D
PF3D7_0708400	DR	DR	DR	DR	DR	DR	D
PF3D7_0708500	D	D	D	D	D	D	D
PF3D7_0708700	DR	DR	D	DR	DR	DR	D
PF3D7_0708800	DR	DR	DR	DR	DR	DR	D
PF3D7_0708900	DR	DR	D	D	DR	D	D
PF3D7_0709000	DR	DR	DR	DR	DR	DR	D
PF3D7_0709100	DR	D	D	DR	DR	DR	D
PF3D7_0709200	0	0	0	0	D	0	0
PF3D7_0709300	D	DR	D	DR	D	D	D
PF3D7_0709400	0	0	0	R	DR	0	0
PF3D7_0709500	0	0	0	R	R	0	0
PF3D7_0709600	DR	DR	DR	DR	D	D	D
PF3D7_0709700	DR	DR	DR	DR	DR	DR	D
PF3D7_0709800	R	0	0	0	R	R	0
PF3D7_0709900	0	0	0	0	D	D	D
PF3D7_0710000	0	0	D	D	D	D	0
PF3D7_0710100	R	R	R	R	DR	0	D
PF3D7_0710300	D	D	D	DR	D	D	D
PF3D7_0710400	0	R	0	R	D	0	0
PF3D7_0710500	0	0	D	DR	DR	R	0
PF3D7_0710600	DR	DR	DR	DR	DR	D	D
PF3D7_0710700	R	R	R	DR	0	D	0
PF3D7_0710800	DR	DR	DR	DR	D	D	D
PF3D7_0710900	DR	DR	D	DR	DR	D	D
PF3D7_0711000	D	D	D	DR	D	D	D
PF3D7_0711100	DR	DR	DR	DR	DR	DR	D
PF3D7_0711200	0	0	0	D	0	0	0
PF3D7_0711300	DR	DR	DR	DR	DR	DR	D
PF3D7_0711400	0	0	D	D	D	0	0
PF3D7_0711500	DR	DR	DR	DR	DR	DR	D
PF3D7_0711700	D	D	D	D	D	D	D
PF3D7_0712000	D	D	D	D	D	D	D
PF3D7_0712200	0	0	D	D	0	0	0
PF3D7_0712300	0	D	0	D	D	D	0
PF3D7_0712400	D	D	0	D	D	D	D
PF3D7_0712600	D	D	0	D	0	D	0
PF3D7_0712800	D	D	0	0	0	0	0
PF3D7_0712900	D	D	D	D	D	D	D
PF3D7_0713000	0	0	0	0	D	0	D
PF3D7_0713100	0	0	0	R	0	0	0
PF3D7_0713200	R	R	R	0	0	0	0
PF3D7_0713300	D	D	0	0	D	0	D
PF3D7_0713400	DR	DR	DR	DR	DR	DR	D
PF3D7_0713500	R	R	0	0	0	0	0
PF3D7_0713600	0	0	D	D	D	D	0
PF3D7_0713700	DR	R	DR	DR	DR	R	0
PF3D7_0713800	0	0	0	0	DR	DR	0
PF3D7_0713900	D	DR	DR	D	D	0	D
PF3D7_0714000	DR	DR	DR	DR	DR	DR	D
PF3D7_0714200	R	R	R	0	R	D	0
PF3D7_0714300	DR	DR	D	D	D	D	D
PF3D7_0714500	DR	DR	DR	DR	DR	D	D
PF3D7_0714600	DR	DR	DR	D	D	D	D
PF3D7_0715000	R	R	DR	DR	0	0	0
PF3D7_0715100	D	D	0	0	D	0	0
PF3D7_0715200	0	0	D	D	D	D	0
PF3D7_0715300	0	0	0	R	R	0	0
PF3D7_0715400	0	0	D	DR	D	D	0
PF3D7_0715500	0	D	D	DR	DR	DR	D
PF3D7_0715600	R	0	D	DR	DR	D	0
PF3D7_0715700	D	D	D	DR	DR	D	D
PF3D7_0715800	DR	DR	D	DR	DR	DR	0
PF3D7_0715900	R	D	D	DR	DR	DR	D
PF3D7_0716000	DR	DR	DR	D	D	0	D
PF3D7_0716100	DR	DR	DR	DR	D	0	D
PF3D7_0716200	DR	DR	DR	DR	DR	DR	D
PF3D7_0716300	DR	DR	DR	DR	DR	DR	D
PF3D7_0716400	DR	0	0	D	D	D	D
PF3D7_0716500	D	D	D	DR	DR	D	D
PF3D7_0716600	D	D	D	DR	D	D	D
PF3D7_0716700	0	D	D	DR	D	D	D
PF3D7_0716800	DR	DR	DR	DR	DR	DR	D
PF3D7_0716900	DR	DR	DR	DR	DR	DR	D
PF3D7_0717000	0	0	0	DR	DR	D	0
PF3D7_0717100	R	D	D	DR	DR	D	0
PF3D7_0717200	DR	DR	DR	DR	DR	DR	D
PF3D7_0717300	DR	DR	DR	DR	DR	DR	D
PF3D7_0717400	DR	DR	DR	DR	DR	D	D
PF3D7_0717500	DR	DR	D	DR	DR	DR	D
PF3D7_0717600	R	0	0	0	DR	0	0
PF3D7_0717700	DR	DR	DR	DR	DR	DR	D
PF3D7_0717800	0	0	D	D	D	0	0
PF3D7_0717900	D	D	DR	DR	D	D	D
PF3D7_0718100	0	0	D	D	D	D	0
PF3D7_0718400	DR	DR	DR	DR	DR	DR	D
PF3D7_0718500	DR	DR	DR	DR	DR	D	D
PF3D7_0718700	0	0	D	DR	D	D	0
PF3D7_0718800	0	0	0	0	0	D	0
PF3D7_0719000	R	R	R	R	R	0	0
PF3D7_0719100	R	D	D	DR	DR	DR	0
PF3D7_0719300	D	DR	DR	DR	D	D	D
PF3D7_0719400	R	0	D	D	DR	D	0
PF3D7_0719500	R	0	0	DR	DR	D	0
PF3D7_0719600	R	R	R	R	R	R	0
PF3D7_0719700	DR	DR	DR	DR	DR	DR	D
PF3D7_0719800	DR	DR	DR	DR	DR	D	D
PF3D7_0719900	R	DR	DR	DR	DR	0	0
PF3D7_0720000	DR	DR	D	DR	R	0	0
PF3D7_0720100	DR	DR	DR	DR	D	0	D
PF3D7_0720200	D	DR	D	DR	D	D	0
PF3D7_0720400	D	D	DR	DR	DR	D	0
PF3D7_0720500	DR	D	D	DR	DR	DR	0
PF3D7_0720600	DR	DR	D	DR	DR	DR	D
PF3D7_0720700	DR	DR	DR	D	DR	D	D
PF3D7_0720800	0	D	D	DR	D	D	D
PF3D7_0720900	0	0	0	D	D	0	0
PF3D7_0721000	D	D	D	D	D	D	0
PF3D7_0721100	DR	R	DR	DR	DR	DR	0
PF3D7_0721200	R	R	R	R	R	0	0
PF3D7_0721300	DR	DR	DR	DR	D	D	D
PF3D7_0721400	R	0	DR	DR	DR	DR	0
PF3D7_0721500	0	0	0	0	D	0	0
PF3D7_0721600	DR	DR	DR	DR	DR	DR	D
PF3D7_0721800	DR	R	DR	R	DR	R	0
PF3D7_0721900	R	R	R	R	R	R	0
PF3D7_0722000	R	DR	DR	DR	DR	0	D
PF3D7_0722100	DR	DR	DR	DR	DR	R	D
PF3D7_0722200	R	R	0	D	DR	DR	D
PF3D7_0722300	DR	DR	DR	DR	D	D	D
PF3D7_0722400	DR	DR	DR	DR	DR	DR	D
PF3D7_0722500	DR	DR	DR	DR	D	D	D
PF3D7_0722600	DR	DR	DR	DR	DR	DR	D
PF3D7_0722700	DR	DR	DR	DR	DR	DR	D
PF3D7_0722800	D	0	0	0	0	0	0
PF3D7_0722900	D	D	D	D	D	D	D
PF3D7_0723000	0	R	D	DR	0	0	0
PF3D7_0723200	0	D	D	D	D	D	D
PF3D7_0723300	0	0	0	D	DR	D	D
PF3D7_0723400	DR	DR	DR	DR	0	0	D
PF3D7_0723500	DR	DR	R	R	0	0	0
PF3D7_0723600	DR	DR	D	DR	D	0	0
PF3D7_0723700	D	D	D	D	D	D	D
PF3D7_0723800	0	D	D	D	DR	D	D
PF3D7_0723900	DR	DR	DR	DR	D	0	0
PF3D7_0724000	0	0	0	D	D	0	0
PF3D7_0724100	0	D	D	D	D	0	0
PF3D7_0724200	R	R	DR	R	0	0	D
PF3D7_0724400	DR	DR	D	DR	DR	D	D
PF3D7_0724600	D	D	D	D	D	D	D
PF3D7_0724700	D	DR	D	D	0	0	0
PF3D7_0724800	DR	D	D	DR	DR	DR	D
PF3D7_0725000	R	0	D	DR	DR	D	0
PF3D7_0725100	DR	DR	D	DR	R	0	0
PF3D7_0725200	DR	DR	DR	DR	DR	DR	D
PF3D7_0725300	DR	DR	DR	DR	D	D	D
PF3D7_0725400	DR	DR	D	DR	DR	DR	D
PF3D7_0726100	DR	DR	R	R	0	R	D
PF3D7_0726200	D	D	DR	DR	D	D	D
PF3D7_0726300	DR	DR	D	D	D	D	D
PF3D7_0726400	D	D	D	D	D	D	0
PF3D7_0726500	DR	DR	DR	DR	D	D	D
PF3D7_0726600	0	0	D	D	D	D	0
PF3D7_0726700	R	0	0	R	R	R	0
PF3D7_0726800	0	0	0	R	0	0	0
PF3D7_0726900	D	D	D	DR	D	D	0
PF3D7_0727000	0	0	0	0	D	0	0
PF3D7_0727100	D	D	D	D	D	D	D
PF3D7_0727200	DR	DR	DR	DR	DR	0	D
PF3D7_0727300	R	R	R	R	0	0	0
PF3D7_0727400	DR	DR	DR	DR	DR	DR	D
PF3D7_0727500	0	0	D	DR	DR	0	0
PF3D7_0727600	0	0	0	DR	0	0	0
PF3D7_0727700	D	D	D	DR	D	D	0
PF3D7_0727800	0	R	R	R	R	0	0
PF3D7_0727900	R	R	R	0	0	0	0
PF3D7_0728000	DR	DR	DR	DR	DR	DR	D
PF3D7_0728100	0	0	0	D	D	D	0
PF3D7_0728200	0	D	D	D	D	D	D
PF3D7_0728300	0	0	D	D	DR	D	0
PF3D7_0728600	0	0	D	D	D	D	D
PF3D7_0728800	0	0	D	DR	D	0	0
PF3D7_0728900	R	R	R	R	0	0	0
PF3D7_0729000	DR	DR	DR	DR	D	D	0
PF3D7_0729200	0	0	0	R	0	0	0
PF3D7_0729300	DR	DR	DR	DR	D	D	D
PF3D7_0729400	DR	DR	DR	DR	DR	DR	D
PF3D7_0729500	DR	DR	DR	DR	D	0	D
PF3D7_0729600	0	0	0	0	D	D	0
PF3D7_0729700	0	0	0	0	R	D	0
PF3D7_0730000	0	0	0	DR	R	0	0
PF3D7_0730200	R	R	R	R	0	0	0
PF3D7_0730300	DR	DR	DR	DR	DR	DR	D
PF3D7_0730400	0	0	0	0	R	R	0
PF3D7_0730500	0	0	0	0	0	D	0
PF3D7_0730800.2	DR	DR	DR	DR	DR	DR	D
PF3D7_0730900	DR	DR	DR	DR	D	D	D
PF3D7_0731100	DR	DR	DR	DR	DR	DR	D
PF3D7_0731200	DR	R	R	R	R	R	D
PF3D7_0731300	DR	DR	DR	DR	DR	DR	D
PF3D7_0731400	D	D	D	D	D	D	0
PF3D7_0731500	DR	DR	DR	DR	DR	DR	D
PF3D7_0731600	DR	DR	DR	DR	DR	DR	D
PF3D7_0731700	0	D	0	0	D	D	0
PF3D7_0731800	DR	DR	0	0	0	D	D
PF3D7_0732000	0	0	D	D	D	0	0
PF3D7_0732100	0	0	0	0	D	D	0
PF3D7_0732200	D	D	D	D	0	0	D
PF3D7_0732300	D	D	D	D	D	0	D
PF3D7_0732400	0	0	D	0	0	0	0
PF3D7_0732500	D	0	D	D	D	D	D
PF3D7_0732900	0	0	D	0	0	0	0
PF3D7_0733000	D	D	D	D	D	D	D
PF3D7_0800100	D	D	D	D	D	D	D
PF3D7_0800200	D	DR	0	D	0	0	0
PF3D7_0800300	DR	DR	DR	D	D	D	D
PF3D7_0800500	D	D	D	0	0	D	D
PF3D7_0800600	0	0	D	D	0	D	D
PF3D7_0800800	D	D	D	0	D	D	0
PF3D7_0800900	DR	0	0	0	0	0	D
PF3D7_0801000	DR	DR	DR	DR	D	DR	D
PF3D7_0801400	0	0	D	0	0	0	0
PF3D7_0801500	DR	DR	DR	DR	0	0	0
PF3D7_0801600	R	0	0	R	DR	0	0
PF3D7_0801700	0	D	D	DR	D	D	0
PF3D7_0801800	DR	DR	DR	DR	DR	DR	D
PF3D7_0801900	D	D	D	D	D	0	D
PF3D7_0802000	DR	DR	DR	DR	DR	DR	D
PF3D7_0802100	0	0	D	0	D	D	0
PF3D7_0802200	DR	DR	DR	DR	DR	DR	D
PF3D7_0802300	DR	DR	DR	DR	D	0	D
PF3D7_0802400	DR	DR	DR	DR	D	D	D
PF3D7_0802500	DR	DR	D	DR	DR	D	D
PF3D7_0802600	D	D	D	D	DR	DR	D
PF3D7_0802800	R	R	0	DR	DR	DR	D
PF3D7_0803000	DR	DR	DR	DR	D	0	D
PF3D7_0803100	D	DR	DR	D	D	D	D
PF3D7_0803200	R	0	0	D	DR	D	0
PF3D7_0803300	0	0	D	D	DR	0	0
PF3D7_0803400	DR	D	D	DR	DR	D	D
PF3D7_0803500	DR	DR	D	DR	DR	DR	D
PF3D7_0803600	DR	DR	DR	DR	DR	D	0
PF3D7_0803700	R	D	DR	DR	DR	DR	D
PF3D7_0803800	DR	DR	DR	DR	DR	DR	D
PF3D7_0804000	DR	DR	DR	DR	D	D	D
PF3D7_0804300	R	R	R	R	0	0	0
PF3D7_0804400	R	0	0	DR	0	0	0
PF3D7_0804500	D	D	D	D	D	D	D
PF3D7_0804600	DR	DR	DR	DR	0	D	D
PF3D7_0804700	0	D	0	0	0	0	0
PF3D7_0804800	DR	DR	DR	DR	DR	DR	D
PF3D7_0804900	DR	DR	DR	DR	DR	DR	D
PF3D7_0805000	0	0	0	R	DR	0	D
PF3D7_0805100	R	0	0	0	0	0	0
PF3D7_0805200	DR	DR	DR	DR	DR	DR	D
PF3D7_0805300	R	R	0	0	0	D	D
PF3D7_0805400	R	R	R	R	R	0	0
PF3D7_0805500	R	R	0	0	R	R	0
PF3D7_0805600	R	R	R	R	R	R	0
PF3D7_0805700	R	0	0	R	R	0	0
PF3D7_0806000	D	D	D	D	0	0	0
PF3D7_0806100	D	DR	D	D	D	0	0
PF3D7_0806200	R	0	0	0	DR	DR	0
PF3D7_0806300	D	D	D	D	DR	D	D
PF3D7_0806400	0	0	D	D	DR	D	0
PF3D7_0806500	DR	DR	DR	DR	DR	DR	D
PF3D7_0806600	DR	DR	R	0	0	0	0
PF3D7_0806700	D	DR	D	D	D	D	D
PF3D7_0806800	DR	DR	DR	DR	DR	DR	D
PF3D7_0806900	0	0	0	DR	0	0	0
PF3D7_0807000	D	DR	DR	DR	DR	D	0
PF3D7_0807100	DR	DR	DR	DR	D	D	D
PF3D7_0807200	DR	DR	DR	DR	DR	DR	D
PF3D7_0807300	DR	DR	DR	DR	DR	DR	0
PF3D7_0807400	0	0	0	R	R	R	0
PF3D7_0807500	DR	DR	DR	DR	DR	DR	D
PF3D7_0807600	DR	DR	DR	DR	D	D	D
PF3D7_0807700	D	D	D	D	D	D	D
PF3D7_0807800	DR	DR	DR	DR	DR	DR	D
PF3D7_0807900	DR	DR	DR	DR	DR	DR	D
PF3D7_0808000	0	0	0	0	0	D	0
PF3D7_0808100	0	R	0	DR	R	0	0
PF3D7_0808200	DR	R	0	0	DR	DR	D
PF3D7_0808300	DR	DR	DR	DR	DR	DR	D
PF3D7_0808400	R	R	R	DR	R	R	0
PF3D7_0808600	D	D	D	D	D	D	D
PF3D7_0808700	D	D	D	D	D	D	D
PF3D7_0808800	0	D	D	0	0	0	D
PF3D7_0808900	D	D	D	D	D	D	D
PF3D7_0809100	DR	DR	DR	D	D	DR	D
PF3D7_0809200	D	R	DR	DR	0	0	0
PF3D7_0809400	0	0	D	DR	D	D	0
PF3D7_0809500	DR	DR	D	DR	D	R	D
PF3D7_0809600	0	D	D	D	D	D	0
PF3D7_0809900	DR	DR	DR	D	D	D	D
PF3D7_0810000	R	R	R	R	R	R	0
PF3D7_0810100	0	0	0	R	DR	D	0
PF3D7_0810200	0	0	D	D	0	0	0
PF3D7_0810300	R	R	R	DR	DR	DR	D
PF3D7_0810400	D	D	D	DR	DR	D	D
PF3D7_0810500	DR	DR	DR	DR	DR	DR	D
PF3D7_0810600	DR	DR	DR	DR	DR	DR	D
PF3D7_0810700	0	0	D	DR	0	0	0
PF3D7_0810800	D	DR	DR	DR	D	0	0
PF3D7_0810900.2	0	0	D	DR	DR	DR	0
PF3D7_0811000	R	0	D	DR	DR	DR	0
PF3D7_0811100	0	0	D	DR	DR	D	0
PF3D7_0811200	DR	DR	DR	DR	DR	D	D
PF3D7_0811300	DR	DR	DR	DR	DR	DR	D
PF3D7_0811400	DR	DR	DR	DR	DR	DR	D
PF3D7_0811500	DR	DR	D	DR	0	0	0
PF3D7_0811600	R	R	R	R	DR	DR	0
PF3D7_0811800	0	0	D	R	DR	0	0
PF3D7_0811900	0	0	D	D	DR	D	0
PF3D7_0812000	0	0	D	DR	0	0	0
PF3D7_0812100	DR	DR	DR	DR	DR	D	D
PF3D7_0812220	0	0	D	DR	DR	0	0
PF3D7_0812400	DR	DR	DR	DR	DR	DR	D
PF3D7_0812500	DR	DR	DR	DR	D	0	D
PF3D7_0812600	DR	DR	DR	DR	DR	DR	D
PF3D7_0812700	DR	DR	DR	DR	DR	DR	D
PF3D7_0812900	0	0	0	0	0	0	D
PF3D7_0813000	DR	R	R	R	R	R	D
PF3D7_0813100	R	R	0	D	DR	D	0
PF3D7_0813200	DR	D	D	DR	DR	D	D
PF3D7_0813300	DR	DR	DR	DR	DR	DR	D
PF3D7_0813400	DR	DR	DR	R	DR	R	0
PF3D7_0813500	R	0	D	D	D	D	0
PF3D7_0813600	DR	DR	DR	DR	DR	DR	D
PF3D7_0813700	D	D	D	DR	D	D	D
PF3D7_0813800	R	R	0	0	0	0	D
PF3D7_0813900	DR	DR	DR	DR	DR	DR	D
PF3D7_0814000	DR	DR	DR	DR	DR	DR	D
PF3D7_0814100	0	R	0	R	0	R	0
PF3D7_0814200	DR	DR	DR	DR	DR	DR	D
PF3D7_0814300	DR	DR	DR	DR	D	D	D
PF3D7_0814400	R	0	0	D	DR	DR	D
PF3D7_0814500	DR	DR	R	0	0	DR	D
PF3D7_0814600	D	D	0	D	0	D	D
PF3D7_0814700	D	D	0	0	0	0	D
PF3D7_0814900	DR	DR	DR	DR	DR	DR	D
PF3D7_0815000	R	0	D	DR	DR	0	0
PF3D7_0815200	R	R	R	DR	R	R	0
PF3D7_0815300	0	D	D	D	D	D	D
PF3D7_0815400	0	D	D	DR	DR	D	0
PF3D7_0815500	R	0	0	DR	DR	DR	0
PF3D7_0815600	DR	DR	DR	DR	DR	DR	0
PF3D7_0815700	0	0	0	D	0	0	0
PF3D7_0815800	0	0	0	D	D	D	0
PF3D7_0815900	0	0	0	D	D	0	0
PF3D7_0816000	DR	DR	DR	DR	0	R	D
PF3D7_0816100	DR	DR	0	DR	DR	DR	D
PF3D7_0816200	0	0	0	R	DR	0	0
PF3D7_0816300	D	0	D	D	D	0	0
PF3D7_0816400	0	0	D	DR	DR	D	D
PF3D7_0816500	0	0	0	D	0	0	0
PF3D7_0816600	0	D	D	DR	D	D	D
PF3D7_0816700	0	D	0	R	DR	D	0
PF3D7_0816800	D	D	D	D	D	D	D
PF3D7_0817000	0	0	D	D	D	0	0
PF3D7_0817200	DR	DR	D	DR	DR	D	D
PF3D7_0817300	DR	DR	DR	DR	D	D	D
PF3D7_0817400	0	D	D	DR	DR	D	0
PF3D7_0817500	DR	DR	DR	DR	DR	DR	0
PF3D7_0817600	R	R	0	0	DR	DR	D
PF3D7_0817700	DR	DR	D	DR	DR	DR	D
PF3D7_0817800	R	0	0	R	R	R	0
PF3D7_0817900	DR	DR	DR	DR	DR	DR	D
PF3D7_0818000	DR	DR	DR	D	D	D	D
PF3D7_0818100	DR	R	0	D	DR	DR	D
PF3D7_0818200	DR	DR	DR	DR	DR	DR	D
PF3D7_0818400	DR	DR	DR	DR	DR	D	D
PF3D7_0818500	DR	DR	DR	DR	DR	DR	D
PF3D7_0818600	0	D	D	D	D	D	D
PF3D7_0818700	DR	DR	DR	DR	0	0	0
PF3D7_0818800	DR	DR	R	R	0	R	D
PF3D7_0818900	DR	DR	DR	DR	DR	DR	D
PF3D7_0819000	DR	DR	DR	DR	D	D	D
PF3D7_0819100	DR	R	R	R	0	0	0
PF3D7_0819300	0	0	D	D	D	0	0
PF3D7_0819500	0	D	DR	DR	0	0	0
PF3D7_0819600	DR	DR	DR	DR	DR	DR	D
PF3D7_0819700	D	D	D	DR	DR	D	D
PF3D7_0819900	0	0	0	R	0	0	0
PF3D7_0820000	DR	DR	DR	DR	D	D	D
PF3D7_0820200	DR	DR	DR	DR	DR	D	D
PF3D7_0820300	DR	DR	DR	DR	DR	DR	D
PF3D7_0820500	DR	DR	DR	DR	DR	DR	D
PF3D7_0820600	0	0	0	D	DR	D	0
PF3D7_0820700	R	0	D	DR	DR	0	0
PF3D7_0820800	0	0	0	0	0	0	D
PF3D7_0820900	R	R	0	0	DR	D	0
PF3D7_0821000	R	R	0	R	R	R	0
PF3D7_0821100	DR	R	R	R	R	0	D
PF3D7_0821200	DR	R	R	R	D	0	0
PF3D7_0821300	R	DR	R	R	0	0	D
PF3D7_0821400	DR	R	R	DR	DR	DR	D
PF3D7_0821500	R	R	R	R	0	0	0
PF3D7_0821600	DR	DR	DR	DR	D	D	D
PF3D7_0821700	DR	DR	DR	DR	DR	DR	D
PF3D7_0821800	DR	DR	DR	DR	DR	DR	D
PF3D7_0821900	0	D	D	DR	D	D	D
PF3D7_0822000	0	D	D	DR	D	D	D
PF3D7_0822100	DR	R	DR	R	0	0	0
PF3D7_0822200	D	D	0	D	D	0	0
PF3D7_0822300	R	R	DR	DR	DR	R	D
PF3D7_0822500	0	D	D	0	0	0	0
PF3D7_0822600	DR	DR	DR	DR	DR	DR	D
PF3D7_0822700	D	0	D	D	D	0	D
PF3D7_0822800	DR	DR	DR	DR	DR	DR	D
PF3D7_0822900	R	R	0	0	DR	DR	D
PF3D7_0823000	0	D	D	D	D	D	0
PF3D7_0823100	R	R	R	R	0	0	0
PF3D7_0823200	DR	DR	DR	DR	DR	DR	D
PF3D7_0823300	DR	DR	DR	DR	DR	D	D
PF3D7_0823700	DR	DR	DR	DR	0	0	0
PF3D7_0823800	DR	DR	DR	DR	DR	DR	0
PF3D7_0823900	DR	D	DR	DR	DR	DR	D
PF3D7_0824100	0	0	D	DR	D	D	0
PF3D7_0824200	D	0	D	D	D	D	0
PF3D7_0824300	0	0	D	D	D	D	0
PF3D7_0824400	DR	DR	DR	DR	DR	DR	D
PF3D7_0824500	0	0	0	R	R	0	0
PF3D7_0824600	DR	DR	DR	DR	DR	0	0
PF3D7_0824700	D	D	D	DR	DR	D	D
PF3D7_0824800	DR	DR	DR	DR	DR	D	D
PF3D7_0824900	DR	DR	DR	DR	0	0	0
PF3D7_0825000	0	0	0	0	D	D	0
PF3D7_0825200	R	0	0	DR	DR	DR	D
PF3D7_0825300	D	D	0	R	R	0	0
PF3D7_0825400	R	0	0	R	R	R	0
PF3D7_0825500	DR	DR	DR	DR	D	D	D
PF3D7_0825600	0	0	D	DR	D	D	0
PF3D7_0825800	0	0	0	0	D	0	0
PF3D7_0826100	D	DR	DR	D	D	0	D
PF3D7_0826300	0	0	D	DR	D	D	0
PF3D7_0826400	R	0	0	R	R	R	0
PF3D7_0826500	DR	DR	DR	DR	DR	DR	D
PF3D7_0826600	0	D	D	DR	DR	D	0
PF3D7_0826700	DR	DR	DR	DR	DR	DR	D
PF3D7_0826900	0	0	0	D	D	0	0
PF3D7_0827000	DR	DR	DR	DR	D	D	D
PF3D7_0827100	D	D	D	DR	D	D	0
PF3D7_0827300	R	R	R	R	0	0	0
PF3D7_0827400	0	D	0	0	D	0	0
PF3D7_0827500	R	0	D	DR	DR	DR	0
PF3D7_0827600	0	0	D	D	D	D	0
PF3D7_0827800	0	R	0	0	D	D	0
PF3D7_0827900	DR	DR	DR	DR	DR	DR	D
PF3D7_0828000	D	D	D	D	D	D	D
PF3D7_0828100	0	0	D	DR	D	0	0
PF3D7_0828200	0	D	D	DR	DR	D	0
PF3D7_0828300	0	0	D	DR	DR	D	0
PF3D7_0828400	0	D	D	D	D	D	0
PF3D7_0828500	R	0	D	DR	DR	DR	0
PF3D7_0828600	R	0	0	D	DR	DR	0
PF3D7_0828700	0	0	0	0	D	D	0
PF3D7_0828800	R	R	0	0	DR	DR	D
PF3D7_0828900	R	0	0	D	DR	DR	0
PF3D7_0829000	D	DR	D	D	D	D	0
PF3D7_0829100	R	R	R	0	0	0	0
PF3D7_0829200	D	D	DR	DR	D	D	D
PF3D7_0829300	D	DR	DR	DR	D	D	D
PF3D7_0829400	R	0	0	D	DR	D	0
PF3D7_0829600	0	D	D	D	D	D	0
PF3D7_0830300	0	0	0	0	D	0	0
PF3D7_0830400	DR	DR	DR	DR	DR	DR	D
PF3D7_0830500	DR	DR	R	0	0	DR	D
PF3D7_0830600	DR	DR	R	R	0	R	D
PF3D7_0830700	DR	DR	DR	DR	D	D	D
PF3D7_0830800	0	0	D	0	0	0	0
PF3D7_0830900	DR	DR	DR	DR	R	DR	0
PF3D7_0831000	0	D	DR	R	0	0	D
PF3D7_0831100	0	D	D	D	0	0	0
PF3D7_0831200	R	R	R	R	R	R	0
PF3D7_0831400	R	R	R	R	R	R	0
PF3D7_0831600	R	R	0	R	R	R	0
PF3D7_0831800	R	R	R	R	R	R	0
PF3D7_0900100	D	D	D	D	D	D	D
PF3D7_0900200	D	D	D	D	0	0	0
PF3D7_0900300	0	D	D	0	0	D	D
PF3D7_0900500	D	D	D	D	DR	DR	D
PF3D7_0900600	D	D	D	D	D	D	D
PF3D7_0900700	D	D	D	D	D	D	D
PF3D7_0900800	D	0	0	0	0	0	0
PF3D7_0900900	0	0	D	0	0	0	0
PF3D7_0901000	0	0	0	D	0	0	D
PF3D7_0901300	0	0	D	D	0	0	0
PF3D7_0901400	0	0	D	D	D	D	D
PF3D7_0901500	0	0	D	0	0	0	0
PF3D7_0901700	R	DR	DR	DR	DR	DR	0
PF3D7_0901800	0	0	0	R	R	R	0
PF3D7_0901900	R	R	0	0	0	0	0
PF3D7_0902000	DR	DR	DR	DR	D	D	0
PF3D7_0902100	0	0	0	0	DR	DR	0
PF3D7_0902200	DR	DR	DR	DR	D	0	0
PF3D7_0902300	DR	DR	DR	DR	D	D	D
PF3D7_0902400	R	0	D	D	0	0	D
PF3D7_0902500	DR	R	R	0	0	DR	D
PF3D7_0902600	D	DR	R	DR	0	0	0
PF3D7_0902700	0	D	D	DR	D	D	0
PF3D7_0902800	0	0	D	DR	DR	DR	D
PF3D7_0903000	R	0	D	DR	DR	0	0
PF3D7_0903100	DR	DR	DR	DR	DR	R	0
PF3D7_0903200	R	R	R	R	R	R	0
PF3D7_0903300	0	0	0	D	DR	D	0
PF3D7_0903400	DR	DR	DR	DR	DR	D	D
PF3D7_0903500	DR	DR	DR	DR	0	0	D
PF3D7_0903600.2	0	0	0	0	0	D	D
PF3D7_0903700	R	DR	DR	DR	DR	DR	D
PF3D7_0903900	DR	DR	DR	DR	DR	DR	D
PF3D7_0904000	DR	DR	DR	DR	DR	DR	D
PF3D7_0904400	DR	DR	D	DR	DR	DR	D
PF3D7_0904500	R	R	R	R	R	0	0
PF3D7_0904600	DR	DR	DR	D	D	D	D
PF3D7_0904700	R	0	D	DR	DR	DR	D
PF3D7_0904800	R	DR	DR	DR	DR	DR	0
PF3D7_0904900	0	0	D	D	D	0	0
PF3D7_0905100	DR	DR	DR	DR	DR	DR	D
PF3D7_0905200	DR	R	DR	DR	0	0	0
PF3D7_0905400	DR	R	DR	DR	DR	DR	D
PF3D7_0905500	DR	R	D	DR	DR	DR	D
PF3D7_0905700.3	DR	DR	DR	DR	DR	DR	0
PF3D7_0905800	R	R	DR	R	0	0	0
PF3D7_0905900	DR	R	DR	R	DR	DR	0
PF3D7_0906000	0	0	0	0	D	0	0
PF3D7_0906100	0	0	D	DR	DR	D	D
PF3D7_0906200	0	0	0	DR	R	0	0
PF3D7_0906300	DR	DR	DR	DR	0	0	0
PF3D7_0906500	DR	DR	DR	DR	R	DR	D
PF3D7_0906600	DR	DR	DR	DR	DR	DR	D
PF3D7_0906700	0	R	0	R	0	0	0
PF3D7_0906800	D	D	D	D	D	0	0
PF3D7_0906910	DR	DR	DR	DR	D	0	D
PF3D7_0907000	R	R	0	R	0	0	0
PF3D7_0907100	0	D	D	D	D	0	0
PF3D7_0907200	DR	DR	DR	DR	DR	D	D
PF3D7_0907300	0	R	0	DR	D	0	0
PF3D7_0907400	R	DR	R	DR	DR	D	0
PF3D7_0907500	0	D	D	D	DR	DR	D
PF3D7_0907600	DR	DR	DR	DR	D	D	D
PF3D7_0907700	DR	DR	DR	DR	DR	DR	D
PF3D7_0907800	DR	R	D	DR	DR	DR	D
PF3D7_0907900	R	R	DR	DR	DR	D	0
PF3D7_0908000	R	R	R	R	DR	DR	0
PF3D7_0908100	0	0	0	0	DR	0	0
PF3D7_0908200	0	0	0	0	DR	D	0
PF3D7_0908300.2	R	0	D	DR	DR	DR	D
PF3D7_0908400	R	R	0	DR	DR	DR	0
PF3D7_0908500	0	0	0	0	DR	D	0
PF3D7_0908600	R	R	R	R	0	0	0
PF3D7_0908700	0	D	D	DR	D	D	0
PF3D7_0908800	DR	DR	DR	DR	DR	D	0
PF3D7_0908900	0	0	D	DR	D	0	0
PF3D7_0909100	0	0	0	D	D	0	0
PF3D7_0909300	R	DR	R	R	0	0	0
PF3D7_0909400	DR	DR	DR	DR	DR	DR	D
PF3D7_0909500	D	D	D	D	D	D	D
PF3D7_0909600	R	0	D	DR	DR	DR	0
PF3D7_0909700	DR	DR	DR	0	DR	DR	D
PF3D7_0909800	DR	DR	DR	DR	DR	DR	D
PF3D7_0909900	R	R	R	R	R	0	0
PF3D7_0910000	0	0	D	0	0	0	0
PF3D7_0910100	DR	DR	DR	DR	DR	DR	D
PF3D7_0910200	D	D	D	D	D	0	0
PF3D7_0910300	DR	DR	DR	DR	DR	DR	0
PF3D7_0910400	0	0	D	D	D	0	0
PF3D7_0910500	R	R	R	R	R	D	0
PF3D7_0910600	D	D	D	D	D	DR	D
PF3D7_0910800	R	D	DR	DR	DR	DR	0
PF3D7_0910900	R	D	D	DR	DR	D	D
PF3D7_0911000	R	0	0	R	R	R	0
PF3D7_0911100	R	R	0	0	DR	DR	D
PF3D7_0911200	0	0	D	R	DR	0	0
PF3D7_0911400	DR	DR	D	DR	D	D	0
PF3D7_0911600	R	0	0	R	R	0	0
PF3D7_0911700	0	0	D	D	D	D	D
PF3D7_0911800	R	0	0	R	DR	DR	0
PF3D7_0911900	DR	DR	DR	DR	DR	DR	D
PF3D7_0912000	R	R	D	DR	D	D	0
PF3D7_0912100	DR	DR	D	DR	D	D	D
PF3D7_0912400	DR	DR	DR	DR	DR	DR	D
PF3D7_0912500	DR	DR	DR	DR	DR	R	D
PF3D7_0912700	R	DR	0	R	0	0	0
PF3D7_0912800	DR	DR	DR	DR	0	0	0
PF3D7_0912900	DR	DR	DR	DR	DR	DR	D
PF3D7_0913000	DR	DR	DR	DR	D	D	D
PF3D7_0913100	0	0	D	D	0	0	0
PF3D7_0913200	DR	DR	DR	DR	DR	DR	D
PF3D7_0913300	DR	DR	DR	DR	D	0	D
PF3D7_0913400	0	0	0	R	0	0	0
PF3D7_0913500	DR	D	D	DR	DR	DR	0
PF3D7_0913600	0	0	0	R	R	0	0
PF3D7_0913700	R	0	DR	DR	DR	R	0
PF3D7_0913800	DR	DR	R	D	DR	DR	D
PF3D7_0913900	R	R	DR	DR	D	0	0
PF3D7_0914000	DR	DR	DR	DR	D	D	D
PF3D7_0914100	0	0	0	0	D	D	D
PF3D7_0914200	DR	DR	DR	DR	DR	DR	D
PF3D7_0914300	DR	DR	DR	DR	D	0	D
PF3D7_0914400	R	D	0	D	DR	D	D
PF3D7_0914500	0	0	D	0	D	0	D
PF3D7_0914600	R	DR	DR	DR	DR	R	0
PF3D7_0914700	DR	DR	DR	DR	DR	DR	D
PF3D7_0914800	R	R	D	DR	DR	DR	0
PF3D7_0914900	R	R	0	0	R	0	0
PF3D7_0915000	R	0	D	DR	DR	DR	0
PF3D7_0915100	DR	DR	DR	DR	DR	DR	D
PF3D7_0915200	R	0	0	0	0	0	0
PF3D7_0915300	0	0	D	DR	D	0	0
PF3D7_0915400	DR	DR	DR	DR	DR	DR	D
PF3D7_0915600	DR	DR	DR	DR	D	D	D
PF3D7_0915700	R	0	D	DR	DR	D	0
PF3D7_0915900	DR	DR	DR	DR	DR	D	D
PF3D7_0916000	R	R	0	D	DR	DR	D
PF3D7_0916100	R	R	0	R	R	0	0
PF3D7_0916200	0	0	D	DR	D	0	0
PF3D7_0916400	DR	DR	D	D	D	D	D
PF3D7_0916500	R	D	D	DR	D	D	D
PF3D7_0916600	R	R	0	R	0	0	0
PF3D7_0916700	DR	DR	DR	DR	DR	DR	D
PF3D7_0916800	R	0	0	R	0	0	0
PF3D7_0916900	DR	DR	DR	DR	DR	DR	D
PF3D7_0917000	R	0	D	DR	DR	D	D
PF3D7_0917100	D	D	D	D	D	D	0
PF3D7_0917200	0	0	0	D	0	0	0
PF3D7_0917300	R	0	0	D	DR	DR	0
PF3D7_0917400	0	0	0	0	0	D	0
PF3D7_0917500	R	0	D	DR	DR	D	0
PF3D7_0917600	DR	DR	DR	DR	D	0	0
PF3D7_0917700	DR	DR	D	DR	D	0	D
PF3D7_0917800	R	R	0	0	R	0	0
PF3D7_0917900	DR	DR	DR	DR	DR	DR	D
PF3D7_0918000	DR	DR	DR	DR	DR	DR	D
PF3D7_0918100	DR	DR	DR	DR	DR	DR	D
PF3D7_0918200	DR	D	D	DR	DR	DR	D
PF3D7_0918300	DR	DR	DR	DR	DR	DR	D
PF3D7_0918400	0	0	0	D	0	0	0
PF3D7_0918600	D	D	D	DR	D	D	D
PF3D7_0918700	DR	R	0	0	D	D	D
PF3D7_0918800	DR	DR	DR	DR	D	DR	D
PF3D7_0918900	R	DR	R	R	D	0	0
PF3D7_0919000	DR	DR	DR	DR	DR	DR	D
PF3D7_0919100	DR	DR	DR	DR	DR	DR	D
PF3D7_0919200	DR	R	D	D	DR	DR	D
PF3D7_0919300	D	R	0	D	DR	DR	D
PF3D7_0919400	R	DR	D	DR	DR	DR	D
PF3D7_0919500	0	D	0	0	0	0	0
PF3D7_0919600	0	D	D	DR	DR	D	0
PF3D7_0919700	R	DR	DR	DR	R	0	0
PF3D7_0919800	DR	DR	D	D	DR	D	D
PF3D7_0919900	D	D	D	D	D	D	D
PF3D7_0920000	D	D	D	D	D	D	D
PF3D7_0920100	D	0	0	R	0	0	0
PF3D7_0920200	0	0	D	DR	DR	D	0
PF3D7_0920400	0	0	D	D	0	D	0
PF3D7_0920500	R	R	D	D	DR	DR	D
PF3D7_0920600	0	0	0	0	R	0	0
PF3D7_0920700	R	R	0	0	DR	DR	D
PF3D7_0920800	DR	DR	DR	DR	DR	DR	D
PF3D7_0920900	DR	DR	DR	DR	DR	0	0
PF3D7_0921000.2	DR	DR	DR	DR	DR	DR	D
PF3D7_0921100	0	0	0	R	0	0	0
PF3D7_0921200	DR	DR	DR	DR	D	0	D
PF3D7_0921400	0	0	D	0	D	0	0
PF3D7_0921500	0	0	0	D	0	0	0
PF3D7_0921600	R	R	D	DR	D	0	0
PF3D7_0921700	0	0	0	D	DR	D	0
PF3D7_0921800	DR	DR	DR	DR	D	0	D
PF3D7_0921900	DR	DR	DR	DR	DR	0	0
PF3D7_0922000	D	0	0	0	0	0	0
PF3D7_0922100	DR	DR	DR	DR	D	D	D
[truncated: 2,644 more rows]
