# Supplementary material for: A network-based approach reveals novel invasion and Maurer's clefts-related proteins in Plasmodium falciparum
Source: Royal Society of Chemistry journal article supplement (doi:10.1039/c9mo00124g), 2019-10-10
Supplement: c9mo00124g1.zip [file c9mo00124g1.zip › supplementary_file_3.xls]

## Sheet: Sheet1
A network-based approach reveals novel invasion and Maurer’s clefts-related proteins in Plasmodium falciparum
Dibyajyoti Das, Sowmya Ramaswamy Krishnan, Arijit Roy* and Gopalakrishnan Bulusu*
TCS Innovation Labs – Hyderabad (Life Sciences Division), Tata Consultancy Services Limited, Hyderabad, India
* Corresponding author
E-mail: roy.arijit3@tcs.com, g.bulusu@tcs.com
Supplementary file 3: Dynamic protein-protein interaction networks of seven intra-erythrocytic stages.
Tabs referring to protein-protein interaction networks of Early ring (ER_network), Late ring (LR_network), Early trophozoite (ET_network), Late trophozoite (LT_network), Early schizont (ES_network), Late schizont (LS_network) and Merozoite (M_network)
Each tab contains the below details:
GeneID of protein 1 as in PlasmoDB
GeneID of protein 2 as in PlasmoDB
STRING confidence score for the interaction of protein 1 and protein 2

## Sheet: ER_network
Gene1	Gene2	Score
PF3D7_0304100	PF3D7_0905400	0.817
PF3D7_1246200	PF3D7_1462800	0.787
PF3D7_0404000	PF3D7_0828800	0.73
PF3D7_0826700	PF3D7_1460300	0.894
PF3D7_1116100	PF3D7_1301600	0.773
PF3D7_0817800	PF3D7_1326000	0.754
PF3D7_0925700	PF3D7_1146600	0.881
PF3D7_1211700	PF3D7_1227600	0.869
PF3D7_0102200	PF3D7_1404800	0.736
PF3D7_0207400	PF3D7_1364100	0.846
PF3D7_0817600	PF3D7_0919900	0.819
PF3D7_1310200	PF3D7_1361800	0.801
PF3D7_0419800	PF3D7_1357700	0.751
PF3D7_1010200	PF3D7_1106300	0.817
PF3D7_0528400	PF3D7_1222700	0.812
PF3D7_0303200	PF3D7_0932200	0.735
PF3D7_0105300	PF3D7_0932100	0.894
PF3D7_0802200	PF3D7_1107400	0.704
PF3D7_0306900	PF3D7_1451100	0.999
PF3D7_1346900	PF3D7_1455700	0.763
PF3D7_0721600	PF3D7_1010600	0.963
PF3D7_0312800	PF3D7_1331300	0.902
PF3D7_0404700	PF3D7_1007300	0.865
PF3D7_1223100	PF3D7_1321500.2	0.847
PF3D7_1240300	PF3D7_1240400	0.875
PF3D7_0804500	PF3D7_0934500	0.961
PF3D7_0105300	PF3D7_0405900	0.881
PF3D7_0803200	PF3D7_0932200	0.83
PF3D7_0802300	PF3D7_1352900	0.752
PF3D7_1251200	PF3D7_1410400	0.946
PF3D7_1419300	PF3D7_1419800.2	0.942
PF3D7_0710900	PF3D7_1323400	0.98
PF3D7_0102500	PF3D7_0203200	0.82
PF3D7_0516900	PF3D7_1428300	0.943
PF3D7_0415300	PF3D7_0520700	0.887
PF3D7_0209600	PF3D7_1436600	0.783
PF3D7_1352200	PF3D7_1405800	0.927
PF3D7_1230900	PF3D7_1364500	0.729
PF3D7_0935600	PF3D7_1201200	0.843
PF3D7_0618000	PF3D7_0934800	0.87
PF3D7_1222300	PF3D7_1406600	0.952
PF3D7_0934800	PF3D7_1035600	0.703
PF3D7_1128900	PF3D7_1364100	0.701
PF3D7_0422700	PF3D7_1424400	0.933
PF3D7_0302500	PF3D7_0932200	0.764
PF3D7_0618000	PF3D7_1251200	0.825
PF3D7_1107000	PF3D7_1350200	0.888
PF3D7_1124000	PF3D7_1352500	0.956
PF3D7_0930300	PF3D7_1472600	0.888
PF3D7_1247900	PF3D7_1411900	0.726
PF3D7_0422400	PF3D7_1224300	0.918
PF3D7_1208100	PF3D7_1317900	0.722
PF3D7_0522400	PF3D7_0929400	0.724
PF3D7_0821000	PF3D7_1471400	0.786
PF3D7_1001600	PF3D7_1317100	0.846
PF3D7_0207100	PF3D7_1461400	0.773
PF3D7_1031200	PF3D7_1361800	0.898
PF3D7_0423500	PF3D7_1422500	0.731
PF3D7_0802800	PF3D7_0923200	0.917
PF3D7_0320100	PF3D7_0910600	0.935
PF3D7_0826700	PF3D7_1015900	0.858
PF3D7_1144900	PF3D7_1246300	0.803
PF3D7_0210000	PF3D7_1331300	0.925
PF3D7_1012200	PF3D7_1146600	0.819
PF3D7_0821500	PF3D7_1224400	0.915
PF3D7_0420100	PF3D7_1107700	0.748
PF3D7_0918300	PF3D7_1410600	0.947
PF3D7_0716800	PF3D7_0918300	0.999
PF3D7_0525800	PF3D7_0613900	0.87
PF3D7_1007200	PF3D7_1252100	0.871
PF3D7_0817600	PF3D7_1321500.2	0.791
PF3D7_0207600	PF3D7_1346900	0.733
PF3D7_0513300	PF3D7_1029600	0.987
PF3D7_0308300	PF3D7_1133400	0.881
PF3D7_0312300	PF3D7_1248900	0.999
PF3D7_0528300	PF3D7_1351700	0.843
PF3D7_0106100	PF3D7_1464700	0.998
PF3D7_0613900	PF3D7_1017100	0.713
PF3D7_1003800	PF3D7_1351400	0.957
PF3D7_0916000	PF3D7_1307500	0.731
PF3D7_1310200	PF3D7_1437300	0.866
PF3D7_0203700	PF3D7_1457700	0.705
PF3D7_0423400	PF3D7_1035900	0.741
PF3D7_0503800	PF3D7_1341200	0.999
PF3D7_0706400	PF3D7_1338200	0.999
PF3D7_1408900	PF3D7_1461200	0.706
PF3D7_0821700	PF3D7_1309100	0.999
PF3D7_1035500	PF3D7_1222700	0.748
PF3D7_0613900	PF3D7_1434200	0.956
PF3D7_1136200	PF3D7_1332200	0.876
PF3D7_0217900	PF3D7_0615500	0.725
PF3D7_0314900	PF3D7_0802800	0.759
PF3D7_0904800	PF3D7_1361900	0.987
PF3D7_0818400	PF3D7_1118500	0.806
PF3D7_0917300	PF3D7_1012200	0.752
PF3D7_0626800	PF3D7_1324900	0.997
PF3D7_0307200	PF3D7_1367600	0.979
PF3D7_0202000	PF3D7_1372200	0.752
PF3D7_0316000	PF3D7_0818100	0.822
PF3D7_0802300	PF3D7_1461200	0.992
PF3D7_0613300	PF3D7_1143100	0.823
PF3D7_1347200	PF3D7_1453700	0.82
PF3D7_1233900	PF3D7_1362400	0.773
PF3D7_0814000	PF3D7_1414300	0.999
PF3D7_0302200	PF3D7_1022700	0.717
PF3D7_0308900	PF3D7_1420000	0.998
PF3D7_0618000	PF3D7_1455300	0.839
PF3D7_1407100	PF3D7_1447000	0.817
PF3D7_0303700	PF3D7_1022500	0.833
PF3D7_1017100	PF3D7_1361800	0.89
PF3D7_0207500	PF3D7_1304000	0.762
PF3D7_0419800	PF3D7_0821700	0.702
PF3D7_0721600	PF3D7_1245400	0.968
PF3D7_0516200	PF3D7_1003500	0.999
PF3D7_0516200	PF3D7_1323400	0.999
PF3D7_0308600	PF3D7_1235900	0.996
PF3D7_1014100	PF3D7_1204900	0.814
PF3D7_0320300	PF3D7_0818900	0.859
PF3D7_1219100	PF3D7_1245800	0.99
PF3D7_0805300	PF3D7_1218000	0.766
PF3D7_0919100	PF3D7_1222300	0.785
PF3D7_0731100	PF3D7_1322100	0.78
PF3D7_1361000	PF3D7_1426200	0.944
PF3D7_1222700	PF3D7_1243700	0.858
PF3D7_0405900	PF3D7_0929400	0.91
PF3D7_0217800	PF3D7_1026800	0.999
PF3D7_0604100	PF3D7_1348600	0.738
PF3D7_0316000	PF3D7_1204900	0.879
PF3D7_0415900	PF3D7_1408100	0.876
PF3D7_0609800	PF3D7_1116100	0.87
PF3D7_1252400	PF3D7_1327300	0.776
PF3D7_0105300	PF3D7_0613300	0.709
PF3D7_1105400	PF3D7_1341200	0.999
PF3D7_1242700	PF3D7_1331800	0.999
PF3D7_0417200	PF3D7_0512700	0.777
PF3D7_1126000	PF3D7_1350100	0.968
PF3D7_0504900	PF3D7_1028600	0.709
PF3D7_0414900	PF3D7_1009700	0.895
PF3D7_0818800	PF3D7_1352200	0.983
PF3D7_1476500	PF3D7_1477300	0.741
PF3D7_0720000	PF3D7_1325000	0.765
PF3D7_0604100	PF3D7_0905500	0.713
PF3D7_0805700	PF3D7_1426700	0.865
PF3D7_0712800	PF3D7_1315700	0.737
PF3D7_1020700	PF3D7_1119200	0.707
PF3D7_1332700	PF3D7_1448000	0.867
PF3D7_0102200	PF3D7_0424800	0.711
PF3D7_1412000	PF3D7_1472600	0.915
PF3D7_0507400	PF3D7_1143100	0.836
PF3D7_0515700	PF3D7_0607700	0.866
PF3D7_0802800	PF3D7_1361800	0.835
PF3D7_0805700	PF3D7_0932100	0.836
PF3D7_0719700	PF3D7_1341200	0.993
PF3D7_1145200	PF3D7_1251200	0.787
PF3D7_0707900	PF3D7_1463400	0.709
PF3D7_0318700	PF3D7_0919200	0.949
PF3D7_1204300	PF3D7_1365900	0.75
PF3D7_1102700	PF3D7_1401400	0.955
PF3D7_0808200	PF3D7_1017500	0.901
PF3D7_0320800	PF3D7_0703500	0.707
PF3D7_1137500	PF3D7_1358800	0.893
PF3D7_0320500	PF3D7_0913300	0.723
PF3D7_0319600	PF3D7_1426100	0.704
PF3D7_1110500	PF3D7_1243000	0.707
PF3D7_0805700	PF3D7_1458300	0.87
PF3D7_1019400	PF3D7_1342000	0.999
PF3D7_0719700	PF3D7_1441200	0.995
PF3D7_0827900	PF3D7_1352500	0.918
PF3D7_0727400	PF3D7_0907700	0.973
PF3D7_1111000	PF3D7_1317900	0.73
PF3D7_0806200	PF3D7_0934800	0.72
PF3D7_0105300	PF3D7_0501500	0.892
PF3D7_0102500	PF3D7_1246400	0.766
PF3D7_0214400	PF3D7_1445200	0.775
PF3D7_0615500	PF3D7_1115600	0.725
PF3D7_0305000	PF3D7_0719600	0.765
PF3D7_1211800	PF3D7_1402300	0.989
PF3D7_0931100	PF3D7_1005100	0.753
PF3D7_0802600	PF3D7_1430200	0.832
PF3D7_0620400	PF3D7_0802600	0.84
PF3D7_0316000	PF3D7_1036000	0.914
PF3D7_1204300	PF3D7_1424100	0.932
PF3D7_1105400	PF3D7_1130200	0.999
PF3D7_1035300	PF3D7_1327300	0.766
PF3D7_0207700	PF3D7_0310400	0.73
PF3D7_0930300	PF3D7_1252100	0.914
PF3D7_0512700	PF3D7_1327800	0.95
PF3D7_0919300	PF3D7_1014100	0.809
PF3D7_1436300	PF3D7_1471100	0.932
PF3D7_0316000	PF3D7_1252400	0.824
PF3D7_1031200	PF3D7_1335100	0.893
PF3D7_0519400	PF3D7_1243600	0.814
PF3D7_0504400	PF3D7_1317100	0.716
PF3D7_0915400	PF3D7_1124500	0.717
PF3D7_0316800	PF3D7_0516900	0.999
PF3D7_0935600	PF3D7_1401100	0.852
PF3D7_1307900	PF3D7_1437300	0.87
PF3D7_0613400	PF3D7_1105400	0.999
PF3D7_1135900	PF3D7_1331600	0.989
PF3D7_0204100	PF3D7_1440100	0.79
PF3D7_0218000	PF3D7_1433500	0.938
PF3D7_0522800	PF3D7_0909800	0.797
PF3D7_0503400	PF3D7_0719300	0.876
PF3D7_1017400	PF3D7_1213900	0.71
PF3D7_0822800	PF3D7_1125500	0.929
PF3D7_0725400	PF3D7_0911100	0.91
PF3D7_1127300	PF3D7_1204600	0.762
PF3D7_0507100	PF3D7_1407100	0.81
PF3D7_1124800	PF3D7_1213700	0.758
PF3D7_0410400	PF3D7_1340100	0.999
PF3D7_1431700	PF3D7_1450100	0.92
PF3D7_0730200	PF3D7_1311400	0.911
PF3D7_0822300	PF3D7_1124400	0.737
PF3D7_1346900	PF3D7_1417800	0.758
PF3D7_1228600	PF3D7_1412000	0.799
PF3D7_0814300	PF3D7_0827000	0.9
PF3D7_0826700	PF3D7_1338300	0.98
PF3D7_0524000	PF3D7_0627700	0.916
PF3D7_0306800	PF3D7_0818900	0.846
PF3D7_1337100	PF3D7_1361900	0.983
PF3D7_1236800	PF3D7_1343100	0.741
PF3D7_0716100	PF3D7_1461200	0.711
PF3D7_1126700	PF3D7_1335100	0.813
PF3D7_1428300	PF3D7_1466700	0.982
PF3D7_0102900	PF3D7_1019400	0.778
PF3D7_0822300	PF3D7_1126800	0.906
PF3D7_0508000	PF3D7_1133300	0.765
PF3D7_0918800	PF3D7_1227800	0.701
PF3D7_0722600	PF3D7_1013100	0.996
PF3D7_1351400	PF3D7_1447000	0.999
PF3D7_0215700	PF3D7_1434500	0.749
PF3D7_0706400	PF3D7_1424400	0.999
PF3D7_0918000	PF3D7_1361700	0.779
PF3D7_1132200	PF3D7_1134000	0.933
PF3D7_0419300	PF3D7_1010200	0.757
PF3D7_0303200	PF3D7_0930500	0.873
PF3D7_1001900	PF3D7_1476000	0.768
PF3D7_0305600	PF3D7_1308800	0.745
PF3D7_1211800	PF3D7_1246200	0.778
PF3D7_1033900	PF3D7_1224100	0.747
PF3D7_0704300	PF3D7_0724600	0.786
PF3D7_0931100	PF3D7_1357700	0.761
PF3D7_1233900	PF3D7_1360700	0.812
PF3D7_1232500	PF3D7_1348600	0.757
PF3D7_0803800	PF3D7_0826500	0.737
PF3D7_1028300	PF3D7_1309600	0.747
PF3D7_1136900	PF3D7_1243700	0.902
PF3D7_0915100	PF3D7_1361900	0.979
PF3D7_0907700	PF3D7_1312900	0.9
PF3D7_0524900	PF3D7_0729300	0.867
PF3D7_0306800	PF3D7_1126000	0.792
PF3D7_1441200	PF3D7_1461200	0.968
PF3D7_0806600	PF3D7_0812400	0.762
PF3D7_1105400	PF3D7_1342000	0.999
PF3D7_0211900	PF3D7_0715900	0.773
PF3D7_0417200	PF3D7_1445100	0.775
PF3D7_0811500	PF3D7_1004400	0.773
PF3D7_1035900	PF3D7_1409400	0.837
PF3D7_0423800	PF3D7_0620400	0.87
PF3D7_0214400	PF3D7_1354300	0.727
PF3D7_0930500	PF3D7_1471400	0.846
PF3D7_1235200	PF3D7_1423300	0.718
PF3D7_1029900	PF3D7_1116100	0.899
PF3D7_0924500	PF3D7_1323700	0.765
PF3D7_0208200	PF3D7_1027100	0.994
PF3D7_0409100	PF3D7_0610100	0.732
PF3D7_0415500	PF3D7_0615700	0.75
PF3D7_0507100	PF3D7_1206200	0.767
PF3D7_0517400	PF3D7_1422500	0.708
PF3D7_1035600	PF3D7_1310200	0.861
PF3D7_1001500	PF3D7_1401100	0.702
PF3D7_0607700	PF3D7_1406800	0.725
PF3D7_1132800	PF3D7_1222700	0.734
PF3D7_0927900	PF3D7_1366800	0.977
PF3D7_1221900	PF3D7_1473900	0.898
PF3D7_0207000	PF3D7_0207400	0.75
PF3D7_0520500	PF3D7_1225800	0.841
PF3D7_0409100	PF3D7_1124400	0.804
PF3D7_0812600	PF3D7_1107400	0.909
PF3D7_0310100	PF3D7_1342600	0.716
PF3D7_0610900	PF3D7_0728900	0.915
PF3D7_0831600	PF3D7_0930300	0.896
PF3D7_1116100	PF3D7_1133400	0.879
PF3D7_1034000	PF3D7_1332000	0.998
PF3D7_0424500	PF3D7_1370300	0.861
PF3D7_0702000	PF3D7_0935600	0.89
PF3D7_0212900	PF3D7_1409300	0.778
PF3D7_1426100	PF3D7_1431700	0.755
PF3D7_0818100	PF3D7_1461400	0.8
PF3D7_1007200	PF3D7_1128900	0.716
PF3D7_0302500	PF3D7_0508000	0.769
PF3D7_0707300	PF3D7_1003100	0.87
PF3D7_0805200	PF3D7_1316200	0.73
PF3D7_0517000	PF3D7_1367600	0.983
PF3D7_0316000	PF3D7_0803500	0.763
PF3D7_0423800	PF3D7_0507400	0.807
PF3D7_1019500.2	PF3D7_1223100	0.714
PF3D7_0110800	PF3D7_1213700	0.97
PF3D7_0918000	PF3D7_1224100	0.82
PF3D7_0913800	PF3D7_1332200	0.885
PF3D7_0818100	PF3D7_1335300	0.901
PF3D7_1029200	PF3D7_1301700	0.816
PF3D7_0419600	PF3D7_0422400	0.753
PF3D7_0508100	PF3D7_1467900	0.704
PF3D7_0608700	PF3D7_0617000	0.799
PF3D7_0407800	PF3D7_1035300	0.899
PF3D7_1012200	PF3D7_1463900	0.894
PF3D7_0802600	PF3D7_1472600	0.817
PF3D7_0218500	PF3D7_0308900	0.987
PF3D7_0110400	PF3D7_1231500	0.91
PF3D7_0217800	PF3D7_1341300	0.999
PF3D7_0203700	PF3D7_0218700	0.709
PF3D7_0806200	PF3D7_1136200	0.703
PF3D7_0404000	PF3D7_0919300	0.711
PF3D7_1250600	PF3D7_1410600	0.999
PF3D7_0805200	PF3D7_1310700	0.95
PF3D7_1123400	PF3D7_1465900	0.959
PF3D7_0219600	PF3D7_1417800	0.797
PF3D7_0319700	PF3D7_0703900	0.745
PF3D7_0813900	PF3D7_1134700	0.762
PF3D7_0817600	PF3D7_1348600	0.907
PF3D7_1117100	PF3D7_1353800	0.979
PF3D7_0308200	PF3D7_1229500	0.996
PF3D7_1130000	PF3D7_1326400	0.849
PF3D7_0102500	PF3D7_0613900	0.87
PF3D7_0802800	PF3D7_1025900	0.921
PF3D7_0706400	PF3D7_1216300	0.9
PF3D7_0705100	PF3D7_1437300	0.727
PF3D7_0102900	PF3D7_1218600	0.866
PF3D7_0516900	PF3D7_1358800	0.999
PF3D7_0802300	PF3D7_1021500	0.963
PF3D7_1230900	PF3D7_1404800	0.813
PF3D7_1403900	PF3D7_1469400	0.708
PF3D7_0931000	PF3D7_1327700	0.707
PF3D7_0715000	PF3D7_1472900	0.818
PF3D7_0618300	PF3D7_1005500	0.958
PF3D7_1026800	PF3D7_1357100	0.947
PF3D7_0614500	PF3D7_1005500	0.9
PF3D7_0602500	PF3D7_1242600	0.753
PF3D7_0818900	PF3D7_1414300	0.731
PF3D7_0613800	PF3D7_1321500.2	0.87
PF3D7_0824600	PF3D7_0910800	0.722
PF3D7_1132800	PF3D7_1323700	0.852
PF3D7_1357000	PF3D7_1468700	0.949
PF3D7_0704500	PF3D7_1025900	0.877
PF3D7_0921800	PF3D7_1471000	0.91
PF3D7_1013800	PF3D7_1412000	0.847
PF3D7_1005500	PF3D7_1465900	0.908
PF3D7_0322000	PF3D7_1338300	0.913
PF3D7_0606200	PF3D7_1235300	0.943
PF3D7_0604100	PF3D7_0607600	0.752
PF3D7_0319600	PF3D7_0913200	0.95
PF3D7_0312500	PF3D7_0317000	0.723
PF3D7_0607000	PF3D7_0719700	0.9
PF3D7_1249500	PF3D7_1470800	0.749
PF3D7_0716300	PF3D7_1338100	0.724
PF3D7_0313500	PF3D7_1023200	0.732
PF3D7_0109200	PF3D7_0933000	0.701
PF3D7_1210000	PF3D7_1348300	0.941
PF3D7_0921800	PF3D7_1329000	0.742
PF3D7_0624600	PF3D7_1226600	0.838
PF3D7_0519400	PF3D7_1323400	0.998
PF3D7_0423500	PF3D7_1246200	0.891
PF3D7_0206600	PF3D7_0209100	0.936
PF3D7_0516200	PF3D7_1015900	0.777
PF3D7_0509800	PF3D7_1320600	0.903
PF3D7_0321400	PF3D7_1436600	0.839
PF3D7_0402100	PF3D7_0402900	0.818
PF3D7_0419400	PF3D7_0803200	0.857
PF3D7_0312800	PF3D7_1358800	0.999
PF3D7_1243700	PF3D7_1252400	0.795
PF3D7_1306600	PF3D7_1464700	0.999
PF3D7_0821100	PF3D7_0934800	0.826
PF3D7_0219600	PF3D7_0510100	0.715
PF3D7_1149200	PF3D7_1200700	0.864
PF3D7_0306800	PF3D7_0422400	0.745
PF3D7_0802800	PF3D7_1222700	0.724
PF3D7_0821000	PF3D7_0927600	0.766
PF3D7_1115300	PF3D7_1410200	0.73
PF3D7_0410300	PF3D7_0623800	0.755
PF3D7_0805300	PF3D7_1337800	0.777
PF3D7_0731500	PF3D7_1133400	0.993
PF3D7_0706400	PF3D7_1124900	0.999
PF3D7_1123900	PF3D7_1461600	0.928
PF3D7_0727400	PF3D7_1008400	0.999
PF3D7_0717500	PF3D7_1128900	0.749
PF3D7_0307200	PF3D7_0818800	0.758
PF3D7_0318200	PF3D7_1414800	0.925
PF3D7_0905400	PF3D7_1035300	0.831
PF3D7_0203700	PF3D7_1107700	0.959
PF3D7_1001600	PF3D7_1440100	0.784
PF3D7_0409100	PF3D7_1027100	0.718
PF3D7_0307200	PF3D7_0519400	0.933
PF3D7_1033400	PF3D7_1428300	0.712
PF3D7_0208200	PF3D7_1465900	0.759
PF3D7_1031500	PF3D7_1342000	0.771
PF3D7_0210600	PF3D7_0404000	0.822
PF3D7_0922200	PF3D7_1034900	0.765
PF3D7_0407000	PF3D7_1476000	0.78
PF3D7_0103600	PF3D7_1224300	0.796
PF3D7_1004000	PF3D7_1137500	0.893
PF3D7_0209600	PF3D7_1107100	0.733
PF3D7_0822600	PF3D7_0905900	0.758
PF3D7_1243700	PF3D7_1439500	0.875
PF3D7_0207700	PF3D7_0305600	0.729
PF3D7_1105400	PF3D7_1109400	0.715
PF3D7_0715900	PF3D7_0716300	0.794
PF3D7_0414900	PF3D7_1222700	0.907
PF3D7_1348300	PF3D7_1447000	0.976
PF3D7_0821500	PF3D7_1012600	0.757
PF3D7_0302500	PF3D7_0419700	0.771
PF3D7_0811000	PF3D7_1356100	0.716
PF3D7_1415800	PF3D7_1445900	0.796
PF3D7_1124700	PF3D7_1211400	0.923
PF3D7_0719500	PF3D7_0927600	0.734
PF3D7_1012200	PF3D7_1307500	0.802
PF3D7_0615500	PF3D7_1247500	0.772
PF3D7_0607000	PF3D7_1143400	0.975
PF3D7_0204100	PF3D7_0717600	0.733
PF3D7_0921800	PF3D7_0931100	0.983
PF3D7_1003600	PF3D7_1238900	0.81
PF3D7_1130100	PF3D7_1358800	0.999
PF3D7_0929400	PF3D7_1335100	0.919
PF3D7_1331300	PF3D7_1460300	0.902
PF3D7_1138700	PF3D7_1221900	0.738
PF3D7_0307400	PF3D7_1015600	0.713
PF3D7_0316800	PF3D7_1012600	0.787
PF3D7_0806300	PF3D7_1025400	0.756
PF3D7_0203200	PF3D7_0808200	0.831
PF3D7_0319000	PF3D7_1364100	0.775
PF3D7_1013800	PF3D7_1436600	0.776
PF3D7_0613900	PF3D7_0920700	0.857
PF3D7_0613300	PF3D7_1301600	0.707
PF3D7_0518300	PF3D7_0608500	0.999
PF3D7_0522600	PF3D7_0613800	0.792
PF3D7_1323100	PF3D7_1341300	0.999
PF3D7_0813300	PF3D7_1251600	0.719
PF3D7_0217500	PF3D7_1030200	0.865
PF3D7_0722200	PF3D7_1423300	0.894
PF3D7_0322900	PF3D7_0422400	0.999
PF3D7_1035500	PF3D7_1035900	0.751
PF3D7_0725200	PF3D7_1117700	0.747
PF3D7_1238900	PF3D7_1243700	0.857
PF3D7_0301300	PF3D7_0621300	0.955
PF3D7_1428300	PF3D7_1445700	0.71
PF3D7_0214400	PF3D7_1302000	0.754
PF3D7_0611700	PF3D7_1317800	0.999
PF3D7_0806200	PF3D7_0905400	0.785
PF3D7_0613300	PF3D7_1125800	0.748
PF3D7_0818900	PF3D7_1347500	0.803
PF3D7_0303200	PF3D7_0929400	0.835
PF3D7_1020700	PF3D7_1124800	0.842
PF3D7_0801800	PF3D7_1226300	0.794
PF3D7_0519400	PF3D7_0707900	0.895
PF3D7_0310200	PF3D7_0716000	0.718
PF3D7_1015900	PF3D7_1123400	0.766
PF3D7_0310400	PF3D7_0410000	0.791
PF3D7_0105400.2	PF3D7_1332200	0.735
PF3D7_1304900	PF3D7_1355800	0.979
PF3D7_1116800	PF3D7_1222300	0.946
PF3D7_0704800	PF3D7_1123200	0.727
PF3D7_0803000	PF3D7_1222300	0.983
PF3D7_0716200	PF3D7_1001400	0.828
PF3D7_0821500	PF3D7_1333600	0.861
PF3D7_1108700	PF3D7_1134000	0.959
PF3D7_0710900	PF3D7_1346100	0.867
PF3D7_0810300	PF3D7_1028700	0.75
PF3D7_1027800	PF3D7_1407100	0.926
PF3D7_0806300	PF3D7_0924500	0.738
PF3D7_0316800	PF3D7_0422400	0.999
PF3D7_0821500	PF3D7_1357700	0.979
PF3D7_0725200	PF3D7_1468700	0.9
PF3D7_1230500	PF3D7_1367600	0.71
PF3D7_1017100	PF3D7_1228600	0.866
PF3D7_0419800	PF3D7_0614500	0.843
PF3D7_1401800	PF3D7_1433500	0.772
PF3D7_1461400	PF3D7_1468400	0.901
PF3D7_0716800	PF3D7_1408600	0.976
PF3D7_0816000	PF3D7_1129400	0.922
PF3D7_0621800	PF3D7_1216900	0.703
PF3D7_0312800	PF3D7_1428300	0.853
PF3D7_0305600	PF3D7_1137500	0.866
PF3D7_1035100	PF3D7_1107100	0.725
PF3D7_0308900	PF3D7_1461600	0.999
PF3D7_0503300	PF3D7_0923000	0.909
PF3D7_0932100	PF3D7_1307900	0.818
PF3D7_0618300	PF3D7_0710600	0.999
PF3D7_1320700	PF3D7_1321500.2	0.859
PF3D7_0304100	PF3D7_1307500	0.847
PF3D7_1030600	PF3D7_1203500	0.797
PF3D7_0503600	PF3D7_0725400	0.873
PF3D7_0207100	PF3D7_0802600	0.785
PF3D7_0707400	PF3D7_1014700	0.824
PF3D7_1414300	PF3D7_1451100	0.998
PF3D7_1234900	PF3D7_1446600	0.712
PF3D7_1144300	PF3D7_1426000	0.9
PF3D7_0102500	PF3D7_1332200	0.929
PF3D7_0320800	PF3D7_1474900	0.998
PF3D7_0106700	PF3D7_0630900	0.872
PF3D7_1035900	PF3D7_1463900	0.898
PF3D7_1020400	PF3D7_1415800	0.849
PF3D7_0729300	PF3D7_1136600	0.727
PF3D7_1431000	PF3D7_1441200	0.914
PF3D7_0206200	PF3D7_0919200	0.771
PF3D7_0212600	PF3D7_1028700	0.898
PF3D7_1229400	PF3D7_1341200	0.746
PF3D7_0322900	PF3D7_1341200	0.999
PF3D7_1230900	PF3D7_1451900	0.866
PF3D7_0207500	PF3D7_0831800	0.725
PF3D7_0524000	PF3D7_1412300	0.854
PF3D7_0917600	PF3D7_1227100	0.784
PF3D7_0526800	PF3D7_0721600	0.703
PF3D7_0219200	PF3D7_0721600	0.999
PF3D7_0206200	PF3D7_1218000	0.807
PF3D7_0525500	PF3D7_1315700	0.763
PF3D7_1025900	PF3D7_1335100	0.885
PF3D7_0817700	PF3D7_1361800	0.797
PF3D7_1109900	PF3D7_1426100	0.755
PF3D7_1130200	PF3D7_1143400	0.718
PF3D7_0822900	PF3D7_1017500	0.861
PF3D7_0810300	PF3D7_1012200	0.776
PF3D7_0212600	PF3D7_1036000	0.781
PF3D7_0404700	PF3D7_0404900	0.742
PF3D7_0903400	PF3D7_1030100	0.721
PF3D7_1119500	PF3D7_1145400	0.731
PF3D7_0803000	PF3D7_1406600	0.91
PF3D7_0206200	PF3D7_1009700	0.709
PF3D7_0404000	PF3D7_1310200	0.803
PF3D7_0303200	PF3D7_1224100	0.789
PF3D7_0203200	PF3D7_0212600	0.774
PF3D7_0415300	PF3D7_0509400	0.769
PF3D7_0501600	PF3D7_0630400	0.713
PF3D7_0917600	PF3D7_1468700	0.845
PF3D7_0613900	PF3D7_1117400	0.743
PF3D7_0615500	PF3D7_1443900	0.833
PF3D7_1431000	PF3D7_1433500	0.781
PF3D7_0707900	PF3D7_0721600	0.885
PF3D7_1329000	PF3D7_1434600	0.774
PF3D7_0302200	PF3D7_1406800	0.807
PF3D7_0502000	PF3D7_1423800	0.859
PF3D7_1015200.3	PF3D7_1454400	0.705
PF3D7_1443900	PF3D7_1462800	0.815
PF3D7_1358400	PF3D7_1437300	0.784
PF3D7_0307100	PF3D7_0517700	0.923
PF3D7_0717700	PF3D7_1225100	0.793
PF3D7_0616800	PF3D7_1022500	0.979
PF3D7_0106700	PF3D7_1013100	0.995
PF3D7_0105400.2	PF3D7_1222700	0.791
PF3D7_0516200	PF3D7_1204300	0.824
PF3D7_0422400	PF3D7_1204300	0.701
PF3D7_1143300	PF3D7_1428300	0.916
PF3D7_1014600	PF3D7_1138800	0.964
PF3D7_1218500	PF3D7_1404900	0.758
PF3D7_0423800	PF3D7_0525800	0.917
PF3D7_1224100	PF3D7_1307900	0.851
PF3D7_0719600	PF3D7_1429700	0.998
PF3D7_0716100	PF3D7_1146000	0.992
PF3D7_0110400	PF3D7_0411400	0.924
PF3D7_1246200	PF3D7_1252100	0.889
PF3D7_1423000	PF3D7_1466700	0.776
PF3D7_1124800	PF3D7_1426200	0.729
PF3D7_0102900	PF3D7_1213800	0.983
PF3D7_0312300	PF3D7_1130400	0.999
PF3D7_0528300	PF3D7_0613900	0.826
PF3D7_0307100	PF3D7_1003800	0.709
PF3D7_1304900	PF3D7_1410200	0.905
PF3D7_1126200	PF3D7_1144000	0.999
PF3D7_0203700	PF3D7_0921800	0.932
PF3D7_1105400	PF3D7_1338300	0.845
PF3D7_0219700	PF3D7_1115800	0.884
PF3D7_0204900	PF3D7_0417200	0.857
PF3D7_1007900	PF3D7_1419700	0.992
PF3D7_0506100	PF3D7_0716100	0.794
PF3D7_1031200	PF3D7_1323700	0.893
PF3D7_0934800	PF3D7_1029900	0.89
PF3D7_0913000	PF3D7_1142600	0.744
PF3D7_0803500	PF3D7_1134000	0.781
PF3D7_0216400	PF3D7_0307600	0.72
PF3D7_0528800	PF3D7_0802300	0.743
PF3D7_0916000	PF3D7_1035300	0.904
PF3D7_1113800	PF3D7_1324100	0.717
PF3D7_0813600	PF3D7_1358800	0.733
PF3D7_0917900	PF3D7_1108600	0.748
PF3D7_0716200	PF3D7_1370300	0.847
PF3D7_0319300	PF3D7_1360700	0.758
PF3D7_1302800	PF3D7_1433600	0.9
PF3D7_0507500	PF3D7_1463900	0.792
PF3D7_0207600	PF3D7_0612700	0.902
PF3D7_1246400	PF3D7_1342600	0.994
PF3D7_1016900	PF3D7_1216500	0.917
PF3D7_0725000	PF3D7_1117800	0.994
PF3D7_0725200	PF3D7_1465900	0.968
PF3D7_0310400	PF3D7_0918000	0.783
PF3D7_1145200	PF3D7_1412000	0.914
PF3D7_0215700	PF3D7_1003500	0.908
PF3D7_0626800	PF3D7_0821300	0.9
PF3D7_0934000	PF3D7_1336900	0.952
PF3D7_1103100	PF3D7_1110600	0.82
PF3D7_1030200	PF3D7_1035300	0.854
PF3D7_0929400	PF3D7_1320700	0.882
PF3D7_0604100	PF3D7_1009700	0.823
PF3D7_0517900	PF3D7_1228600	0.726
PF3D7_0712800	PF3D7_0712900	0.881
PF3D7_1321500.2	PF3D7_1437300	0.855
PF3D7_0306900	PF3D7_0506100	0.816
PF3D7_0802800	PF3D7_1125700	0.734
PF3D7_0719600	PF3D7_1460700	0.999
PF3D7_1012600	PF3D7_1416800	0.91
PF3D7_0102900	PF3D7_1355500	0.703
PF3D7_0613300	PF3D7_0828600	0.705
PF3D7_0105300	PF3D7_1033900	0.779
PF3D7_1322500	PF3D7_1406800	0.724
PF3D7_0318200	PF3D7_0622800	0.801
PF3D7_0220800	PF3D7_1321500.2	0.792
PF3D7_0618000	PF3D7_1342600	0.786
PF3D7_0803400	PF3D7_1107400	0.997
PF3D7_1206700	PF3D7_1408600	0.916
PF3D7_0818900	PF3D7_1413900	0.909
PF3D7_0708800	PF3D7_0919100	0.836
PF3D7_0507400	PF3D7_1412000	0.827
PF3D7_0932000	PF3D7_1023000	0.836
PF3D7_0519400	PF3D7_1424400	0.996
PF3D7_0515800	PF3D7_0606900	0.869
PF3D7_0715600	PF3D7_0925300	0.714
PF3D7_1136200	PF3D7_1344300	0.712
PF3D7_0207700	PF3D7_1471400	0.795
PF3D7_0802300	PF3D7_0818400	0.827
PF3D7_1015100	PF3D7_1235900	0.947
PF3D7_1142500	PF3D7_1431700	0.983
PF3D7_1115800	PF3D7_1201200	0.797
PF3D7_0204100	PF3D7_0806200	0.766
PF3D7_0215700	PF3D7_1421400	0.871
PF3D7_0403700	PF3D7_0518500	0.841
PF3D7_0525500	PF3D7_1333600	0.72
PF3D7_0520700	PF3D7_0714500	0.835
PF3D7_0310500	PF3D7_0317000	0.764
PF3D7_0931800	PF3D7_1011400	0.999
PF3D7_1115800	PF3D7_1342600	0.722
PF3D7_0928900	PF3D7_1351600	0.957
PF3D7_1342800	PF3D7_1343200	0.925
PF3D7_0613900	PF3D7_1028700	0.74
PF3D7_0310400	PF3D7_0709100	0.726
PF3D7_0723400	PF3D7_1227800	0.702
PF3D7_1437900	PF3D7_1443900	0.961
PF3D7_1002000	PF3D7_1148800	0.791
PF3D7_1315900	PF3D7_1412300	0.835
PF3D7_0215700	PF3D7_1006800	0.74
PF3D7_0405400	PF3D7_1004400	0.95
PF3D7_1315700	PF3D7_1358700	0.835
PF3D7_1323100	PF3D7_1367600	0.988
PF3D7_1001500	PF3D7_1301400	0.853
PF3D7_0207000	PF3D7_0620400	0.756
PF3D7_0613900	PF3D7_0831600	0.789
PF3D7_0613300	PF3D7_1243700	0.798
PF3D7_1017900	PF3D7_1353800	0.999
PF3D7_1015600	PF3D7_1225100	0.714
PF3D7_0731500	PF3D7_0918700	0.751
PF3D7_1243700	PF3D7_1406800	0.728
PF3D7_1022700	PF3D7_1452000	0.848
PF3D7_0522100	PF3D7_0932100	0.732
PF3D7_0908400	PF3D7_1364100	0.795
PF3D7_1421200	PF3D7_1465900	0.999
PF3D7_0509400	PF3D7_1346100	0.81
PF3D7_1033900	PF3D7_1333200	0.723
PF3D7_0920700	PF3D7_1035900	0.754
PF3D7_0318200	PF3D7_1364800	0.999
PF3D7_0312400	PF3D7_0412000	0.71
PF3D7_0306900	PF3D7_1308200	0.739
PF3D7_0220800	PF3D7_0414900	0.704
PF3D7_0207600	PF3D7_0220800	0.78
PF3D7_0803800	PF3D7_1130400	0.999
PF3D7_0621100	PF3D7_1344300	0.87
PF3D7_0524900	PF3D7_1357700	0.734
PF3D7_1406800	PF3D7_1410400	0.889
PF3D7_1133400	PF3D7_1361800	0.9
PF3D7_0507100	PF3D7_0622800	0.811
PF3D7_0801500	PF3D7_1357700	0.996
PF3D7_1009700	PF3D7_1423300	0.895
PF3D7_0801500	PF3D7_1354300	0.937
PF3D7_0412900	PF3D7_0712600	0.81
PF3D7_0507200	PF3D7_0717600	0.732
PF3D7_1252100	PF3D7_1348600	0.825
PF3D7_1361700	PF3D7_1421400	0.945
PF3D7_0422300	PF3D7_1216500	0.799
PF3D7_1001600	PF3D7_1319400	0.73
PF3D7_0502000	PF3D7_1309700	0.991
PF3D7_1322500	PF3D7_1439400	0.729
PF3D7_0525800	PF3D7_1316200	0.848
PF3D7_0818900	PF3D7_1132200	0.898
PF3D7_0313400	PF3D7_1405500	0.73
PF3D7_0206200	PF3D7_1335300	0.786
PF3D7_0423800	PF3D7_1204900	0.918
PF3D7_0102200	PF3D7_0707500	0.798
PF3D7_1025400	PF3D7_1146600	0.866
PF3D7_0204500	PF3D7_1416500	0.861
PF3D7_0507100	PF3D7_1143400	0.751
PF3D7_0821700	PF3D7_1431700	0.999
PF3D7_0608700	PF3D7_1357800	0.999
PF3D7_0203700	PF3D7_1224400	0.866
PF3D7_0512600	PF3D7_1214400	0.964
PF3D7_0516200	PF3D7_1342000	0.999
PF3D7_0422400	PF3D7_1144000	0.999
PF3D7_0515700	PF3D7_0916000	0.919
PF3D7_0622200	PF3D7_1454200	0.725
PF3D7_1223000	PF3D7_1232500	0.76
PF3D7_0936300	PF3D7_1201200	0.81
PF3D7_0613800	PF3D7_1452000	0.814
PF3D7_0210000	PF3D7_1026800	0.904
PF3D7_0920800	PF3D7_1116800	0.866
PF3D7_1357700	PF3D7_1415800	0.909
PF3D7_1026600	PF3D7_1307500	0.782
PF3D7_1248200	PF3D7_1472000	0.851
PF3D7_1239700	PF3D7_1433500	0.791
PF3D7_0909400	PF3D7_1325000	0.986
PF3D7_0905400	PF3D7_1145200	0.9
PF3D7_0805700	PF3D7_1307900	0.795
PF3D7_0508100	PF3D7_1439500	0.746
PF3D7_0729400	PF3D7_0801500	0.892
PF3D7_0607600	PF3D7_0905400	0.766
PF3D7_1341300	PF3D7_1358800	0.999
PF3D7_0409200	PF3D7_1028300	0.848
PF3D7_1143300	PF3D7_1461200	0.977
PF3D7_0607000	PF3D7_1206200	0.989
PF3D7_1310700	PF3D7_1412000	0.81
PF3D7_0920800	PF3D7_1227100	0.72
PF3D7_0707300	PF3D7_0916000	0.87
PF3D7_0818100	PF3D7_0913800	0.92
PF3D7_0218500	PF3D7_1126900	0.999
PF3D7_0307100	PF3D7_1431700	0.995
PF3D7_0320300	PF3D7_1030100	0.704
PF3D7_0312800	PF3D7_1433500	0.788
PF3D7_0303200	PF3D7_1410400	0.748
PF3D7_0310400	PF3D7_1440100	0.786
PF3D7_1125400	PF3D7_1413900	0.714
PF3D7_1359100	PF3D7_1417500	0.748
PF3D7_0303000	PF3D7_0608500	0.953
PF3D7_0214200	PF3D7_1210000	0.956
PF3D7_1228600	PF3D7_1307900	0.822
PF3D7_0215700	PF3D7_1037600	0.754
PF3D7_0813900	PF3D7_1206600	0.785
PF3D7_0704300	PF3D7_1116100	0.78
PF3D7_0813900	PF3D7_1004000	0.999
PF3D7_0321400	PF3D7_1035300	0.884
PF3D7_1004000	PF3D7_1450100	0.981
PF3D7_0618000	PF3D7_1125800	0.772
PF3D7_1116100	PF3D7_1345600	0.797
PF3D7_0517000	PF3D7_1414300	0.999
PF3D7_0727400	PF3D7_0818900	0.915
PF3D7_1028400	PF3D7_1302700	0.78
PF3D7_0419400	PF3D7_1009700	0.75
PF3D7_0320300	PF3D7_0919100	0.725
PF3D7_1306400	PF3D7_1470900	0.999
PF3D7_0515700	PF3D7_0813100	0.781
PF3D7_0828800	PF3D7_1030200	0.795
PF3D7_0211200	PF3D7_0506700	0.879
PF3D7_0106700	PF3D7_0825500	0.901
PF3D7_0932100	PF3D7_1320700	0.816
PF3D7_1364100	PF3D7_1405600	0.715
PF3D7_1027800	PF3D7_1216300	0.92
PF3D7_0817700	PF3D7_1348600	0.834
PF3D7_1307300	PF3D7_1466700	0.744
PF3D7_1026800	PF3D7_1331300	0.917
PF3D7_0317600	PF3D7_1421200	0.999
PF3D7_0727200	PF3D7_0910800	0.784
PF3D7_0306800	PF3D7_1246200	0.824
PF3D7_1007300	PF3D7_1251200	0.938
PF3D7_0404700	PF3D7_0423800	0.774
PF3D7_0720100	PF3D7_1354300	0.761
PF3D7_0409400	PF3D7_0906910	0.728
PF3D7_1134700	PF3D7_1424400	0.739
PF3D7_0821300	PF3D7_1110200	0.76
PF3D7_0507500	PF3D7_0810300	0.867
PF3D7_0217500	PF3D7_1463900	0.895
PF3D7_0207100	PF3D7_1025400	0.704
PF3D7_0308900	PF3D7_1474500	0.986
PF3D7_1020400	PF3D7_1028300	0.777
PF3D7_1028400	PF3D7_1408900	0.782
PF3D7_1105400	PF3D7_1351400	0.999
PF3D7_0102900	PF3D7_1367700	0.881
PF3D7_1140400	PF3D7_1335100	0.899
PF3D7_0415900	PF3D7_1346300	0.893
PF3D7_0617800	PF3D7_1441400	0.794
PF3D7_1341200	PF3D7_1426100	0.849
PF3D7_0729400	PF3D7_1005100	0.74
PF3D7_0103600	PF3D7_0413600	0.931
PF3D7_0411400	PF3D7_1109400	0.895
PF3D7_1008800	PF3D7_1461200	0.988
PF3D7_1117100	PF3D7_1331300	0.74
PF3D7_1149200	PF3D7_1251200	0.812
PF3D7_0507200	PF3D7_0924500	0.741
PF3D7_0917300	PF3D7_1437300	0.771
PF3D7_0920500	PF3D7_1133400	0.766
PF3D7_0701900	PF3D7_0707500	0.773
PF3D7_0405200	PF3D7_1463900	0.73
PF3D7_0306800	PF3D7_1110700	0.824
PF3D7_1342700	PF3D7_1410200	0.919
PF3D7_0525500	PF3D7_1009000	0.711
PF3D7_0320700	PF3D7_1211700	0.778
PF3D7_0719600	PF3D7_1460300	0.999
PF3D7_0210000	PF3D7_0516900	0.961
PF3D7_0919200	PF3D7_1017100	0.739
PF3D7_0721600	PF3D7_1415800	0.892
PF3D7_1358800	PF3D7_1426000	0.999
PF3D7_0417200	PF3D7_1204600	0.858
PF3D7_0802600	PF3D7_1223100	0.813
PF3D7_1337100	PF3D7_1367000	0.757
PF3D7_0804300	PF3D7_1462400	0.756
PF3D7_1130200	PF3D7_1323100	0.999
PF3D7_0603500	PF3D7_1451700	0.724
PF3D7_0916000	PF3D7_1351700	0.823
PF3D7_0823300	PF3D7_1227800	0.981
PF3D7_1308200	PF3D7_1332900	0.758
PF3D7_0113300	PF3D7_0902300	0.706
PF3D7_1143300	PF3D7_1348300	0.9
PF3D7_1115800	PF3D7_1352900	0.844
PF3D7_0423500	PF3D7_0932000	0.733
PF3D7_0905400	PF3D7_1025900	0.892
PF3D7_0402100	PF3D7_1149600	0.949
PF3D7_0801500	PF3D7_1027100	0.947
PF3D7_0302100	PF3D7_1468800	0.799
PF3D7_1211800	PF3D7_1308200	0.987
PF3D7_0407800	PF3D7_1014100	0.865
PF3D7_0517900	PF3D7_0704500	0.705
PF3D7_0414900	PF3D7_1459900	0.734
PF3D7_0817600	PF3D7_1431400	0.777
PF3D7_0807500	PF3D7_1239700	0.763
PF3D7_0303400	PF3D7_1027900	0.761
PF3D7_1232500	PF3D7_1344300	0.803
PF3D7_1356100	PF3D7_1364100	0.762
PF3D7_0302900	PF3D7_1315900	0.865
PF3D7_0407800	PF3D7_0528400	0.906
PF3D7_0602400	PF3D7_1123400	0.735
PF3D7_0402300	PF3D7_0919200	0.789
PF3D7_0729400	PF3D7_1118500	0.887
PF3D7_0303200	PF3D7_1232500	0.798
PF3D7_0934100	PF3D7_1030100	0.744
PF3D7_0903200	PF3D7_1250300	0.935
PF3D7_0607000	PF3D7_1302800	0.917
PF3D7_0828600	PF3D7_1423300	0.74
PF3D7_1231600	PF3D7_1472000	0.955
PF3D7_1205900	PF3D7_1422800	0.719
PF3D7_1143400	PF3D7_1230900	0.702
PF3D7_0217100	PF3D7_0827500	0.754
PF3D7_0106000	PF3D7_0927300	0.725
PF3D7_0318200	PF3D7_0925700	0.79
PF3D7_0212600	PF3D7_1035900	0.861
PF3D7_0814400	PF3D7_1348500	0.907
PF3D7_1218000	PF3D7_1337800	0.937
PF3D7_0319000	PF3D7_1320700	0.741
PF3D7_0717500	PF3D7_0722200	0.879
PF3D7_0934800	PF3D7_1455300	0.714
PF3D7_0411400	PF3D7_0626800	0.923
PF3D7_1321800	PF3D7_1332000	0.923
PF3D7_0820000	PF3D7_1143300	0.948
PF3D7_0725400	PF3D7_1231200	0.718
PF3D7_0803100	PF3D7_1136600	0.768
PF3D7_1003800	PF3D7_1323400	0.944
PF3D7_0817700	PF3D7_1012200	0.921
PF3D7_0505800	PF3D7_1365400	0.852
PF3D7_0407800	PF3D7_0802600	0.927
PF3D7_0516200	PF3D7_1224300	0.92
PF3D7_0704300	PF3D7_0821000	0.72
PF3D7_1309100	PF3D7_1408600	0.999
PF3D7_0921200	PF3D7_1441000	0.774
PF3D7_0906600	PF3D7_1459200	0.746
PF3D7_0811000	PF3D7_1346900	0.725
PF3D7_1145200	PF3D7_1228600	0.894
PF3D7_0507500	PF3D7_0618000	0.87
PF3D7_0304100	PF3D7_0913800	0.825
PF3D7_0729400	PF3D7_1146000	0.809
PF3D7_0424100	PF3D7_1316200	0.83
PF3D7_0719600	PF3D7_1330600	0.816
PF3D7_0320900	PF3D7_1335100	0.767
PF3D7_0317600	PF3D7_0706400	0.984
PF3D7_0503800	PF3D7_1424100	0.999
PF3D7_1317900	PF3D7_1353100	0.713
PF3D7_0607600	PF3D7_0918000	0.71
PF3D7_0317600	PF3D7_1338200	0.999
PF3D7_0209600	PF3D7_1128900	0.745
PF3D7_0104400	PF3D7_1128400	0.96
PF3D7_0612900	PF3D7_1225500	0.884
PF3D7_1335100	PF3D7_1364100	0.853
PF3D7_0303300	PF3D7_1213700	0.999
PF3D7_1350100	PF3D7_1442300	0.97
PF3D7_0303200	PF3D7_0506900	0.759
PF3D7_1230600	PF3D7_1466700	0.987
PF3D7_1210000	PF3D7_1342000	0.824
PF3D7_0405400	PF3D7_0811400	0.806
PF3D7_0702100	PF3D7_0800900	0.771
PF3D7_0920500	PF3D7_1469200	0.929
PF3D7_0729400	PF3D7_1424100	0.924
PF3D7_0306800	PF3D7_1033400	0.793
PF3D7_1320700	PF3D7_1436600	0.77
PF3D7_1006800	PF3D7_1022400	0.815
PF3D7_0927300	PF3D7_1211700	0.708
PF3D7_1134000	PF3D7_1454500	0.963
PF3D7_0100100	PF3D7_0733000	0.734
PF3D7_0416100	PF3D7_0926700	0.75
PF3D7_0813300	PF3D7_0814000	0.747
PF3D7_1003800	PF3D7_1245400	0.954
PF3D7_0501000	PF3D7_0532300	0.767
PF3D7_1248900	PF3D7_1470900	0.999
PF3D7_1127500	PF3D7_1352500	0.879
PF3D7_0106700	PF3D7_1123900	0.763
PF3D7_0702000	PF3D7_1102700	0.75
PF3D7_1308300	PF3D7_1323400	0.995
PF3D7_1323100	PF3D7_1460300	0.999
PF3D7_0818800	PF3D7_1118500	0.96
PF3D7_1133700	PF3D7_1221900	0.714
PF3D7_0207500	PF3D7_0607600	0.798
PF3D7_0215300	PF3D7_0707500	0.754
PF3D7_0206200	PF3D7_0620400	0.827
PF3D7_0407800	PF3D7_1133400	0.896
PF3D7_0209600	PF3D7_1458300	0.733
PF3D7_1243700	PF3D7_1436600	0.767
PF3D7_0318200	PF3D7_1110600	0.765
PF3D7_0919300	PF3D7_1136900	0.857
PF3D7_0607000	PF3D7_1224300	0.727
PF3D7_1213900	PF3D7_1250600	0.999
PF3D7_0920500	PF3D7_1014100	0.743
PF3D7_0721300	PF3D7_1143300	0.958
PF3D7_1321500.2	PF3D7_1358400	0.752
PF3D7_0705700	PF3D7_0707900	0.852
PF3D7_1004000	PF3D7_1143400	0.984
PF3D7_0705100	PF3D7_0817600	0.77
PF3D7_0704500	PF3D7_1141800	0.742
PF3D7_0423500	PF3D7_0930300	0.913
PF3D7_0504400	PF3D7_1405600	0.962
PF3D7_1109400	PF3D7_1230600	0.937
PF3D7_0204100	PF3D7_1013800	0.714
PF3D7_0826700	PF3D7_1026800	0.999
PF3D7_1134700	PF3D7_1329000	0.993
PF3D7_0303200	PF3D7_1140400	0.731
PF3D7_0503300	PF3D7_1355800	0.919
PF3D7_1326000	PF3D7_1346900	0.783
PF3D7_0828600	PF3D7_1436600	0.79
PF3D7_1317900	PF3D7_1470200	0.726
PF3D7_1140700	PF3D7_1414100	0.716
PF3D7_0823900	PF3D7_1223800	0.765
PF3D7_0814900	PF3D7_1345100	0.785
PF3D7_0207100	PF3D7_0210600	0.722
PF3D7_0911100	PF3D7_0934800	0.717
PF3D7_1344200	PF3D7_1357800	0.796
PF3D7_0817600	PF3D7_1468400	0.806
PF3D7_0622200	PF3D7_0921800	0.797
PF3D7_0206200	PF3D7_1003600	0.799
PF3D7_0306900	PF3D7_1206600	0.905
PF3D7_1252100	PF3D7_1439500	0.771
PF3D7_1124500	PF3D7_1430700	0.779
PF3D7_0507400	PF3D7_0810300	0.756
PF3D7_0818900	PF3D7_1433500	0.864
PF3D7_0409400	PF3D7_1344900	0.749
PF3D7_0405000	PF3D7_1129400	0.909
PF3D7_1412600	PF3D7_1463400	0.769
PF3D7_1017100	PF3D7_1323700	0.858
PF3D7_1120100	PF3D7_1462800	0.971
PF3D7_0904700	PF3D7_1470800	0.748
PF3D7_1116100	PF3D7_1247500	0.769
PF3D7_0810300	PF3D7_1406800	0.834
PF3D7_1235600	PF3D7_1419800.2	0.832
PF3D7_1302800	PF3D7_1365900	0.999
PF3D7_1307100	PF3D7_1352200	0.999
PF3D7_0413900	PF3D7_1460400	0.804
PF3D7_0217800	PF3D7_0306900	0.999
PF3D7_0419700	PF3D7_0822900	0.894
PF3D7_0915100	PF3D7_1356300	0.835
PF3D7_1209200	PF3D7_1231500	0.943
PF3D7_1306400	PF3D7_1338100	0.999
PF3D7_0527900	PF3D7_1232100	0.89
PF3D7_0405400	PF3D7_0725200	0.759
PF3D7_0423800	PF3D7_1251200	0.896
PF3D7_0921200	PF3D7_1140700	0.716
PF3D7_0819100	PF3D7_1412600	0.711
PF3D7_1012400	PF3D7_1012600	0.962
PF3D7_0217900	PF3D7_1015800	0.744
PF3D7_0507500	PF3D7_1455300	0.924
PF3D7_0726100	PF3D7_0814500	0.78
PF3D7_0424100	PF3D7_1036500	0.918
PF3D7_1118600	PF3D7_1472200	0.907
PF3D7_0716100	PF3D7_0801500	0.999
PF3D7_0827000	PF3D7_1217200	0.901
PF3D7_1340100	PF3D7_1359300	0.943
PF3D7_1012600	PF3D7_1350100	0.939
PF3D7_0109000	PF3D7_0930300	0.867
PF3D7_1003500	PF3D7_1211800	0.979
PF3D7_0927300	PF3D7_1320700	0.708
PF3D7_0321400	PF3D7_1308000	0.724
PF3D7_0503800	PF3D7_1308300	0.999
PF3D7_0605300	PF3D7_0610400	0.846
PF3D7_1012500	PF3D7_1325100	0.961
PF3D7_1252900	PF3D7_1401400	0.798
PF3D7_0102500	PF3D7_0515400	0.805
PF3D7_0921800	PF3D7_1429500	0.715
PF3D7_0527000	PF3D7_0705300	0.998
PF3D7_1322500	PF3D7_1364100	0.783
PF3D7_0408000	PF3D7_1342600	0.799
PF3D7_0821300	PF3D7_1241800	0.888
PF3D7_0203700	PF3D7_0816000	0.805
PF3D7_1012200	PF3D7_1228600	0.893
PF3D7_1359300	PF3D7_1427800	0.922
PF3D7_0414900	PF3D7_1035500	0.956
PF3D7_0936300	PF3D7_1253300	0.845
PF3D7_0203700	PF3D7_0802300	0.87
PF3D7_0721600	PF3D7_1329000	0.81
PF3D7_0409600	PF3D7_1226600	0.959
PF3D7_0423500	PF3D7_0918000	0.894
PF3D7_0203200	PF3D7_1007300	0.815
PF3D7_0712800	PF3D7_0800200	0.733
PF3D7_1109400	PF3D7_1207100	0.725
PF3D7_0309600	PF3D7_0913200	0.84
PF3D7_0411900	PF3D7_1111100	0.959
PF3D7_0212300	PF3D7_0316800	0.946
PF3D7_0403800	PF3D7_0525800	0.889
PF3D7_0725200	PF3D7_0923900	0.84
PF3D7_0109000	PF3D7_1238900	0.834
PF3D7_0424500	PF3D7_1002100	0.785
PF3D7_0109000	PF3D7_1361800	0.871
PF3D7_1101900	PF3D7_1479200	0.704
PF3D7_1003100	PF3D7_1117400	0.723
PF3D7_1033700	PF3D7_1227800	0.812
PF3D7_1428300	PF3D7_1451900	0.902
PF3D7_1143100	PF3D7_1345600	0.783
PF3D7_0621100	PF3D7_1238600	0.87
PF3D7_0320800	PF3D7_1124400	0.987
PF3D7_0319000	PF3D7_1235200	0.862
PF3D7_1003500	PF3D7_1323100	0.999
PF3D7_1247900	PF3D7_1471000	0.842
PF3D7_0508100	PF3D7_1227600	0.769
PF3D7_0917100	PF3D7_1226600	0.755
PF3D7_0615500	PF3D7_1342400	0.742
PF3D7_0322000	PF3D7_1412300	0.954
PF3D7_1305300	PF3D7_1444500	0.742
PF3D7_0403700	PF3D7_0629400	0.798
PF3D7_1211800	PF3D7_1320600	0.72
PF3D7_0212300	PF3D7_1460700	0.929
PF3D7_0306800	PF3D7_1433500	0.81
PF3D7_1211800	PF3D7_1302800	0.916
PF3D7_0505800	PF3D7_1237000	0.999
PF3D7_0316800	PF3D7_0621800	0.774
PF3D7_0520300	PF3D7_1414800	0.917
PF3D7_0501500	PF3D7_1437300	0.901
PF3D7_0306900	PF3D7_1211800	0.894
PF3D7_0602400	PF3D7_1331800	0.96
PF3D7_0516900	PF3D7_0814000	0.999
PF3D7_0503300	PF3D7_1003800	0.916
PF3D7_1011700	PF3D7_1027700.2	0.76
PF3D7_0814500	PF3D7_1240100	0.706
PF3D7_0615500	PF3D7_0811000	0.96
PF3D7_0530200	PF3D7_1211700	0.709
PF3D7_1204900	PF3D7_1316200	0.874
PF3D7_0317000	PF3D7_0727400	0.999
PF3D7_0509400	PF3D7_1210000	0.751
PF3D7_0903900	PF3D7_1332800	0.709
PF3D7_1408600	PF3D7_1441200	0.999
PF3D7_0420100	PF3D7_1317800	0.743
PF3D7_0308600	PF3D7_0522800	0.993
PF3D7_0520000	PF3D7_1342000	0.999
PF3D7_0920800	PF3D7_1015800	0.772
PF3D7_1252100	PF3D7_1365600	0.708
PF3D7_0919200	PF3D7_1301600	0.893
PF3D7_1225100	PF3D7_1416800	0.783
PF3D7_0305600	PF3D7_0613400	0.813
PF3D7_0620400	PF3D7_1406800	0.734
PF3D7_1001200	PF3D7_1001600	0.726
PF3D7_0515400	PF3D7_1222700	0.72
PF3D7_1036500	PF3D7_1136900	0.946
PF3D7_1125700	PF3D7_1412000	0.759
PF3D7_0106000	PF3D7_1343100	0.783
PF3D7_1128900	PF3D7_1344300	0.718
PF3D7_0831600	PF3D7_1003600	0.852
PF3D7_0501300	PF3D7_1352900	0.78
PF3D7_1213800	PF3D7_1229500	0.732
PF3D7_0105400.2	PF3D7_1251200	0.763
PF3D7_0528300	PF3D7_1232500	0.729
PF3D7_1431000	PF3D7_1461200	0.913
PF3D7_0929400	PF3D7_1308000	0.842
PF3D7_0905400	PF3D7_0916000	0.868
PF3D7_0512700	PF3D7_1005500	0.701
PF3D7_1134700	PF3D7_1348300	0.915
PF3D7_0503800	PF3D7_0707900	0.827
PF3D7_0934800	PF3D7_1335100	0.89
PF3D7_1035900	PF3D7_1461400	0.896
PF3D7_1329000	PF3D7_1349200	0.724
PF3D7_0726500	PF3D7_0904600	0.888
PF3D7_0302000	PF3D7_1307800	0.728
PF3D7_0912800	PF3D7_1357700	0.831
PF3D7_0411000	PF3D7_1217200	0.707
PF3D7_0113300	PF3D7_0731100	0.82
PF3D7_0210600	PF3D7_1251200	0.967
PF3D7_0719700	PF3D7_1242700	0.999
PF3D7_1235200	PF3D7_1344300	0.795
PF3D7_1007300	PF3D7_1437300	0.836
PF3D7_1358100	PF3D7_1471000	0.828
PF3D7_0208200	PF3D7_0825500	0.978
PF3D7_0613900	PF3D7_1035900	0.87
PF3D7_0929400	PF3D7_1003600	0.801
PF3D7_0618300	PF3D7_1460300	0.999
PF3D7_0215700	PF3D7_0714500	0.991
PF3D7_0525800	PF3D7_0911100	0.925
PF3D7_0615500	PF3D7_1008700	0.801
PF3D7_0703900	PF3D7_1367400	0.857
PF3D7_0618000	PF3D7_0831600	0.87
PF3D7_0927300	PF3D7_1015900	0.764
PF3D7_1226700	PF3D7_1431300	0.853
PF3D7_0301600	PF3D7_1367400	0.796
PF3D7_0218400	PF3D7_1107700	0.868
PF3D7_0903900	PF3D7_1341300	0.999
PF3D7_0613300	PF3D7_1307900	0.756
PF3D7_1236900	PF3D7_1459900	0.76
PF3D7_0915000	PF3D7_1347700	0.752
PF3D7_0319300	PF3D7_1225800	0.989
PF3D7_0722600	PF3D7_1415800	0.896
PF3D7_0702500	PF3D7_1301400	0.892
PF3D7_0423500	PF3D7_0817600	0.798
PF3D7_0810300	PF3D7_1308000	0.72
PF3D7_0805700	PF3D7_1116100	0.87
PF3D7_0712800	PF3D7_0808700	0.734
PF3D7_1252100	PF3D7_1452000	0.966
PF3D7_0209600	PF3D7_0302500	0.722
PF3D7_0717700	PF3D7_1012600	0.851
PF3D7_1302000	PF3D7_1401400	0.715
PF3D7_0632800	PF3D7_0712900	0.715
PF3D7_1321500.2	PF3D7_1326000	0.728
PF3D7_1027800	PF3D7_1354400	0.702
PF3D7_0602100	PF3D7_1021500	0.801
PF3D7_0410400	PF3D7_0720000	0.996
PF3D7_0516900	PF3D7_1246800	0.9
PF3D7_0415400	PF3D7_1429800	0.999
PF3D7_0920800	PF3D7_1115300	0.722
PF3D7_0714500	PF3D7_0923000	0.989
PF3D7_1145100	PF3D7_1429800	0.999
PF3D7_1247500	PF3D7_1449100	0.89
PF3D7_0210600	PF3D7_0818100	0.953
PF3D7_0405900	PF3D7_0717500	0.82
PF3D7_0110900	PF3D7_0418700	0.729
PF3D7_0628600	PF3D7_1033700	0.703
PF3D7_0207700	PF3D7_0419400	0.805
PF3D7_0813100	PF3D7_1472600	0.754
PF3D7_0619400	PF3D7_1134100	0.74
PF3D7_1005100	PF3D7_1109400	0.814
PF3D7_0615500	PF3D7_1223100	0.952
PF3D7_0308300	PF3D7_1023000	0.761
PF3D7_0316800	PF3D7_1323100	0.999
PF3D7_0209600	PF3D7_0934800	0.814
PF3D7_1022500	PF3D7_1426700	0.963
PF3D7_0509600	PF3D7_1442300	0.86
PF3D7_0730800.2	PF3D7_1105600	0.703
PF3D7_0630500	PF3D7_1143300	0.787
PF3D7_0404900	PF3D7_0717500	0.77
PF3D7_1344200	PF3D7_1443900	0.944
PF3D7_1003500	PF3D7_1212700	0.939
PF3D7_0827500	PF3D7_1323100	0.909
PF3D7_0110700	PF3D7_1226600	0.794
PF3D7_0317600	PF3D7_1105400	0.999
PF3D7_0219700	PF3D7_1477800	0.748
PF3D7_0213100	PF3D7_1229500	0.741
PF3D7_0818900	PF3D7_1143200	0.795
PF3D7_0320700	PF3D7_0805700	0.709
PF3D7_0820000	PF3D7_1118600	0.787
PF3D7_0424100	PF3D7_0731500	0.993
PF3D7_0320700	PF3D7_1113300	0.774
PF3D7_0108500	PF3D7_1252600	0.701
PF3D7_0105800	PF3D7_0919900	0.877
PF3D7_0503600	PF3D7_0507400	0.803
PF3D7_0934800	PF3D7_1414400	0.953
PF3D7_0315100	PF3D7_0716800	0.729
PF3D7_0923000	PF3D7_1213700	0.999
PF3D7_0822900	PF3D7_1316200	0.856
PF3D7_0110400	PF3D7_1304900	0.999
PF3D7_1036000	PF3D7_1455300	0.954
PF3D7_1017500	PF3D7_1335100	0.717
PF3D7_1333200	PF3D7_1367000	0.771
PF3D7_1307000	PF3D7_1449700	0.994
PF3D7_1222700	PF3D7_1344300	0.717
PF3D7_0306800	PF3D7_0516400	0.941
PF3D7_0414900	PF3D7_1345600	0.711
PF3D7_0217500	PF3D7_0613300	0.87
PF3D7_1318800	PF3D7_1342400	0.885
PF3D7_0621100	PF3D7_1315300	0.737
PF3D7_1225500	PF3D7_1451900	0.872
PF3D7_0322900	PF3D7_0721600	0.999
PF3D7_0604100	PF3D7_0704800	0.72
PF3D7_0316800	PF3D7_0517000	0.999
PF3D7_0305000	PF3D7_1003800	0.788
PF3D7_0307200	PF3D7_1428300	0.944
PF3D7_1118200	PF3D7_1125400	0.731
PF3D7_1126200	PF3D7_1212700	0.941
PF3D7_1213700	PF3D7_1317900	0.798
PF3D7_0507400	PF3D7_0911100	0.947
PF3D7_0525800	PF3D7_1452000	0.741
PF3D7_0903900	PF3D7_1428300	0.873
PF3D7_0614500	PF3D7_0721600	0.996
PF3D7_0615500	PF3D7_0934800	0.934
PF3D7_0726900	PF3D7_1125400	0.895
PF3D7_1338200	PF3D7_1421200	0.994
PF3D7_0613800	PF3D7_1019500.2	0.848
PF3D7_0519200	PF3D7_1341900	0.998
PF3D7_0708800	PF3D7_1454500	0.916
PF3D7_0303300	PF3D7_1134700	0.985
PF3D7_1031400.2	PF3D7_1365600	0.759
PF3D7_0217500	PF3D7_0308300	0.927
PF3D7_1353800	PF3D7_1470900	0.999
PF3D7_0501600	PF3D7_0811600	0.722
PF3D7_1017900	PF3D7_1474800	0.999
PF3D7_0920700	PF3D7_1014100	0.888
PF3D7_0511000	PF3D7_0614500	0.817
PF3D7_0931800	PF3D7_1466300	0.997
PF3D7_0106700	PF3D7_1461200	0.971
PF3D7_1015800	PF3D7_1302700	0.908
PF3D7_0802600	PF3D7_1035700	0.794
PF3D7_0317200	PF3D7_0319000	0.898
PF3D7_1008900	PF3D7_1104200	0.9
PF3D7_0409200	PF3D7_1013100	0.997
PF3D7_0519400	PF3D7_1142600	0.998
PF3D7_0306900	PF3D7_1408600	0.999
PF3D7_0822300	PF3D7_1325000	0.94
PF3D7_1130100	PF3D7_1338200	0.999
PF3D7_0417200	PF3D7_1143300	0.785
PF3D7_1124400	PF3D7_1343900	0.943
PF3D7_0203200	PF3D7_1105500	0.87
PF3D7_0105300	PF3D7_1031400.2	0.789
PF3D7_1224400	PF3D7_1404500	0.92
PF3D7_0722600	PF3D7_1249900	0.847
PF3D7_0608800	PF3D7_1419800.2	0.774
PF3D7_0109000	PF3D7_1246200	0.765
PF3D7_1015900	PF3D7_1453700	0.703
PF3D7_0704500	PF3D7_0806200	0.792
PF3D7_1237600	PF3D7_1471000	0.752
PF3D7_0826700	PF3D7_1338200	0.994
PF3D7_1001200	PF3D7_1434800	0.768
PF3D7_1406700	PF3D7_1464600	0.716
PF3D7_0613400	PF3D7_1465900	0.999
PF3D7_1322100	PF3D7_1431200	0.758
PF3D7_0919400	PF3D7_1344200	0.833
PF3D7_1238600	PF3D7_1252100	0.903
PF3D7_1022400	PF3D7_1445400	0.842
PF3D7_1346100	PF3D7_1465900	0.891
PF3D7_0821700	PF3D7_1426000	0.999
PF3D7_0310500	PF3D7_1302500	0.863
PF3D7_0217100	PF3D7_1222300	0.852
PF3D7_0424500	PF3D7_1221900	0.846
PF3D7_1222300	PF3D7_1357800	0.788
PF3D7_1343900	PF3D7_1443300	0.956
PF3D7_0306900	PF3D7_1468700	0.948
PF3D7_0725400	PF3D7_1143100	0.91
PF3D7_0405900	PF3D7_1025400	0.924
PF3D7_0105800	PF3D7_1356100	0.769
PF3D7_0929400	PF3D7_1036000	0.75
PF3D7_0528400	PF3D7_1316200	0.708
PF3D7_0515700	PF3D7_1025900	0.905
PF3D7_0614500	PF3D7_1204300	0.726
PF3D7_0308600	PF3D7_0415500	0.861
PF3D7_1019400	PF3D7_1358800	0.999
PF3D7_0321400	PF3D7_1035900	0.769
PF3D7_0320900	PF3D7_1329300	0.835
PF3D7_0715900	PF3D7_1137500	0.719
PF3D7_0707300	PF3D7_1323700	0.845
PF3D7_0403200	PF3D7_1230800	0.774
PF3D7_0824400	PF3D7_1227200	0.708
PF3D7_0528800	PF3D7_1454200	0.708
PF3D7_1306200	PF3D7_1364100	0.855
PF3D7_0414900	PF3D7_1232500	0.828
PF3D7_0523000	PF3D7_1229100	0.937
PF3D7_0207700	PF3D7_1315300	0.73
PF3D7_0918600	PF3D7_1361900	0.941
PF3D7_1028000	PF3D7_1303100	0.769
PF3D7_0212600	PF3D7_0822900	0.916
PF3D7_1309100	PF3D7_1358800	0.999
PF3D7_1142600	PF3D7_1323100	0.999
PF3D7_1035300	PF3D7_1452000	0.912
PF3D7_0922500	PF3D7_1351600	0.866
PF3D7_0518300	PF3D7_1311500	0.999
PF3D7_0920800	PF3D7_1325100	0.882
PF3D7_0308300	PF3D7_1136900	0.857
PF3D7_0817600	PF3D7_1455300	0.843
PF3D7_0818200	PF3D7_1338300	0.799
PF3D7_1232500	PF3D7_1320700	0.884
PF3D7_0710600	PF3D7_1441200	0.999
PF3D7_1017100	PF3D7_1243400	0.731
PF3D7_0203200	PF3D7_1307500	0.786
PF3D7_0719600	PF3D7_1365900	0.999
PF3D7_0730900	PF3D7_1148700	0.845
PF3D7_1123900	PF3D7_1226700	0.894
PF3D7_1025900	PF3D7_1472600	0.743
PF3D7_0525800	PF3D7_0822900	0.896
PF3D7_1031500	PF3D7_1110200	0.755
PF3D7_1104100	PF3D7_1459200	0.746
PF3D7_0800100	PF3D7_1100100	0.717
PF3D7_1028300	PF3D7_1307100	0.731
PF3D7_1412000	PF3D7_1437300	0.917
PF3D7_1031200	PF3D7_1145200	0.914
PF3D7_1122800	PF3D7_1451700	0.744
PF3D7_0307100	PF3D7_0706400	0.989
PF3D7_0508100	PF3D7_0717600	0.813
PF3D7_0716800	PF3D7_1240400	0.855
PF3D7_1017900	PF3D7_1328100	0.999
PF3D7_1408600	PF3D7_1410600	0.956
PF3D7_0632800	PF3D7_1240900	0.742
PF3D7_0422400	PF3D7_1004000	0.999
PF3D7_0307200	PF3D7_1405800	0.864
PF3D7_0405200	PF3D7_1128900	0.719
PF3D7_0522300	PF3D7_1015800	0.845
PF3D7_0623800	PF3D7_1138500	0.755
PF3D7_0405400	PF3D7_1110200	0.999
PF3D7_0902500	PF3D7_1149600	0.774
PF3D7_1026600	PF3D7_1252400	0.899
PF3D7_1317800	PF3D7_1460700	0.999
PF3D7_1310200	PF3D7_1335100	0.787
PF3D7_0405000	PF3D7_0821300	0.795
PF3D7_0722600	PF3D7_1124800	0.792
PF3D7_1236900	PF3D7_1410400	0.871
PF3D7_0525100	PF3D7_1200700	0.924
PF3D7_0708100	PF3D7_1110200	0.918
PF3D7_1235700	PF3D7_1433500	0.797
PF3D7_0215700	PF3D7_0520600	0.94
PF3D7_0410300	PF3D7_1431500	0.812
PF3D7_0409600	PF3D7_1417800	0.839
PF3D7_0727400	PF3D7_1353800	0.999
PF3D7_0424100	PF3D7_1031400.2	0.704
PF3D7_1105400	PF3D7_1109900	0.998
PF3D7_1035300	PF3D7_1323700	0.811
PF3D7_0220800	PF3D7_0508100	0.716
PF3D7_0217500	PF3D7_1010300	0.735
PF3D7_0306900	PF3D7_1103100	0.998
PF3D7_0520000	PF3D7_0528200	0.943
PF3D7_1213700	PF3D7_1225400	0.768
PF3D7_0902500	PF3D7_1240100	0.725
PF3D7_0607700	PF3D7_0831600	0.743
PF3D7_0934800	PF3D7_1232500	0.881
PF3D7_0730800.2	PF3D7_1016700	0.727
PF3D7_0814600	PF3D7_1342600	0.756
PF3D7_0513100	PF3D7_1422500	0.756
PF3D7_0423800	PF3D7_0919300	0.835
PF3D7_0803200	PF3D7_1321500.2	0.871
PF3D7_0208200	PF3D7_0520000	0.767
PF3D7_0725000	PF3D7_1361900	0.983
PF3D7_0312800	PF3D7_1132700	0.996
PF3D7_0423800	PF3D7_1016000	0.82
PF3D7_0806200	PF3D7_0811000	0.777
PF3D7_0715900	PF3D7_0925300	0.709
PF3D7_0705500	PF3D7_1251200	0.738
PF3D7_0320300	PF3D7_1222300	0.79
PF3D7_1143100	PF3D7_1455300	0.954
PF3D7_1146600	PF3D7_1471400	0.802
PF3D7_0203400	PF3D7_0904700	0.88
PF3D7_1010200	PF3D7_1357700	0.766
PF3D7_1015900	PF3D7_1132200	0.776
PF3D7_1015900	PF3D7_1342800	0.982
PF3D7_1149200	PF3D7_1433500	0.843
PF3D7_0617100	PF3D7_0905900	0.769
PF3D7_0924500	PF3D7_1035100	0.769
PF3D7_1436000	PF3D7_1476200	0.79
PF3D7_1129200	PF3D7_1358700	0.762
PF3D7_1419800.2	PF3D7_1454700	0.85
PF3D7_0501000	PF3D7_0532400	0.745
PF3D7_0407800	PF3D7_1308000	0.894
PF3D7_0929400	PF3D7_1351700	0.739
PF3D7_0106700	PF3D7_0302000	0.8
PF3D7_1228600	PF3D7_1446600	0.742
PF3D7_0210600	PF3D7_0618000	0.87
PF3D7_1327400	PF3D7_1361700	0.74
PF3D7_0810800	PF3D7_1224000	0.985
PF3D7_0805700	PF3D7_1107100	0.762
PF3D7_0418100	PF3D7_0708700	0.936
PF3D7_0811000	PF3D7_1333200	0.818
PF3D7_0710600	PF3D7_1450100	0.918
PF3D7_0320700	PF3D7_0504900	0.701
PF3D7_1344300	PF3D7_1348600	0.72
PF3D7_0503300	PF3D7_1304900	0.91
PF3D7_0918700	PF3D7_1337800	0.931
PF3D7_0623800	PF3D7_1149600	0.882
PF3D7_0613300	PF3D7_0717500	0.766
PF3D7_1012200	PF3D7_1452000	0.893
PF3D7_0721300	PF3D7_1421400	0.936
PF3D7_0204900	PF3D7_0215300	0.729
PF3D7_0516200	PF3D7_1366600	0.927
PF3D7_0920800	PF3D7_1113400	0.799
PF3D7_1211400	PF3D7_1433500	0.783
PF3D7_1124500	PF3D7_1342800	0.817
PF3D7_1343900	PF3D7_1350200	0.957
PF3D7_0305000	PF3D7_1027800	0.82
PF3D7_0810300	PF3D7_1116100	0.885
PF3D7_1033600	PF3D7_1220100	0.993
PF3D7_0629100	PF3D7_0913300	0.721
PF3D7_1204300	PF3D7_1431700	0.808
PF3D7_1001800	PF3D7_1252600	0.739
PF3D7_0719700	PF3D7_1461300	0.999
PF3D7_0614500	PF3D7_1124900	0.999
PF3D7_1207100	PF3D7_1417500	0.751
PF3D7_0305000	PF3D7_1323000	0.711
PF3D7_0306400	PF3D7_1117100	0.722
PF3D7_1245400	PF3D7_1460300	0.749
PF3D7_0307100	PF3D7_1123400	0.925
PF3D7_0801500	PF3D7_1028300	0.836
PF3D7_0916700	PF3D7_1368100	0.9
PF3D7_1242700	PF3D7_1341300	0.999
PF3D7_0416400	PF3D7_1117100	0.766
PF3D7_0511200	PF3D7_0607700	0.714
PF3D7_0204100	PF3D7_0508100	0.892
PF3D7_0714000	PF3D7_1328800	0.755
PF3D7_1015600	PF3D7_1116800	0.912
PF3D7_0516900	PF3D7_1134000	0.744
PF3D7_1136900	PF3D7_1252400	0.954
PF3D7_0407800	PF3D7_0501600	0.924
PF3D7_0415500	PF3D7_0503300	0.922
PF3D7_0304100	PF3D7_1016000	0.771
PF3D7_1020700	PF3D7_1118500	0.974
PF3D7_1004500	PF3D7_1223100	0.722
PF3D7_0619900	PF3D7_1307200	0.915
PF3D7_0316000	PF3D7_0515400	0.755
PF3D7_1332200	PF3D7_1423300	0.897
PF3D7_0814300	PF3D7_1008800	0.763
PF3D7_1032100	PF3D7_1209200	0.736
PF3D7_1109400	PF3D7_1226700	0.979
PF3D7_1026800	PF3D7_1408100	0.939
PF3D7_0402300	PF3D7_1439500	0.728
PF3D7_0932000	PF3D7_1007300	0.747
PF3D7_1019900	PF3D7_1323700	0.754
PF3D7_1404800	PF3D7_1436300	0.934
PF3D7_0509400	PF3D7_1406200	0.757
PF3D7_0905400	PF3D7_1133400	0.862
PF3D7_1028300	PF3D7_1354300	0.846
PF3D7_0220800	PF3D7_1344300	0.738
PF3D7_0716100	PF3D7_1340300	0.853
PF3D7_0302500	PF3D7_0929400	0.968
PF3D7_0528400	PF3D7_1022700	0.95
PF3D7_1125400	PF3D7_1333600	0.78
PF3D7_1307500	PF3D7_1461400	0.771
PF3D7_1252100	PF3D7_1437300	0.924
PF3D7_1030100	PF3D7_1031500	0.833
PF3D7_0822300	PF3D7_1443300	0.95
PF3D7_0917900	PF3D7_1308200	0.812
PF3D7_0312800	PF3D7_0721600	0.998
PF3D7_0802800	PF3D7_0929400	0.812
PF3D7_1019400	PF3D7_1224300	0.91
PF3D7_0829300	PF3D7_1443300	0.999
PF3D7_0317200	PF3D7_0905400	0.739
PF3D7_0109000	PF3D7_0919200	0.827
PF3D7_0805700	PF3D7_1117100	0.74
PF3D7_0308900	PF3D7_0405400	0.994
PF3D7_0503300	PF3D7_0518500	0.906
PF3D7_1331700	PF3D7_1349200	0.967
PF3D7_0704300	PF3D7_1422500	0.714
PF3D7_1251500	PF3D7_1354300	0.992
PF3D7_0802000	PF3D7_1436000	0.923
PF3D7_1123900	PF3D7_1414300	0.888
PF3D7_0419800	PF3D7_1105400	0.796
PF3D7_0621100	PF3D7_1003100	0.87
PF3D7_1132200	PF3D7_1461900	0.753
PF3D7_1134200	PF3D7_1225500	0.79
PF3D7_0505500	PF3D7_1433500	0.827
PF3D7_0727200	PF3D7_1410200	0.772
PF3D7_0817700	PF3D7_1036000	0.828
PF3D7_0108600	PF3D7_1136800	0.749
PF3D7_0218000	PF3D7_1211700	0.885
PF3D7_0516200	PF3D7_1341200	0.999
PF3D7_1246800	PF3D7_1323400	0.9
PF3D7_0201900	PF3D7_0730900	0.786
PF3D7_1012600	PF3D7_1415800	0.947
PF3D7_0310500	PF3D7_1227100	0.795
PF3D7_0826500	PF3D7_1229500	0.729
PF3D7_0716200	PF3D7_0727200	0.706
PF3D7_0507400	PF3D7_1423300	0.869
PF3D7_0501100.2	PF3D7_0902300	0.75
PF3D7_0704500	PF3D7_0803200	0.904
PF3D7_0911800	PF3D7_1143400	0.707
PF3D7_1116100	PF3D7_1455300	0.768
PF3D7_0217800	PF3D7_0611700	0.99
PF3D7_1116800	PF3D7_1434300	0.953
PF3D7_1012600	PF3D7_1358800	0.836
PF3D7_0528400	PF3D7_0707300	0.893
PF3D7_1359400	PF3D7_1410600	0.715
PF3D7_1027100	PF3D7_1028400	0.879
PF3D7_0920100	PF3D7_1214600	0.897
PF3D7_1323700	PF3D7_1356100	0.76
PF3D7_1007300	PF3D7_1318000	0.79
PF3D7_0921200	PF3D7_1405800	0.701
PF3D7_0312800	PF3D7_1027800	0.999
PF3D7_0620400	PF3D7_1204900	0.84
PF3D7_0725300	PF3D7_1129400	0.758
PF3D7_0909800	PF3D7_1004400	0.932
PF3D7_0320300	PF3D7_0813900	0.719
PF3D7_0504400	PF3D7_0626800	0.913
PF3D7_1213800	PF3D7_1222300	0.805
PF3D7_0517300	PF3D7_1003800	0.94
PF3D7_1241800	PF3D7_1404500	0.821
PF3D7_0503300	PF3D7_1022400	0.945
PF3D7_0629700	PF3D7_0804500	0.738
PF3D7_1234800	PF3D7_1452700	0.922
PF3D7_0821300	PF3D7_1309300	0.729
PF3D7_0302200	PF3D7_0802600	0.9
PF3D7_0525800	PF3D7_1361800	0.882
PF3D7_0324900	PF3D7_0712000	0.763
PF3D7_0504400	PF3D7_0715900	0.742
PF3D7_0203700	PF3D7_1340300	0.745
PF3D7_0721600	PF3D7_1004000	0.998
PF3D7_0704800	PF3D7_1437300	0.745
PF3D7_0705300	PF3D7_1355100	0.996
PF3D7_0501500	PF3D7_0515700	0.894
PF3D7_0218500	PF3D7_0924700	0.918
PF3D7_1144900	PF3D7_1145400	0.77
PF3D7_0619400	PF3D7_1466300	0.753
PF3D7_0310400	PF3D7_0932200	0.73
PF3D7_0206200	PF3D7_0911100	0.933
PF3D7_1302700	PF3D7_1437200	0.913
PF3D7_0506100	PF3D7_1445900	0.72
PF3D7_0217500	PF3D7_1025900	0.839
PF3D7_0308900	PF3D7_0503300	0.922
PF3D7_1017500	PF3D7_1240100	0.828
PF3D7_0821000	PF3D7_1470800	0.722
PF3D7_0618000	PF3D7_1348600	0.83
PF3D7_1309100	PF3D7_1433600	0.9
PF3D7_0511200	PF3D7_1331600	0.826
PF3D7_1143400	PF3D7_1351400	0.81
PF3D7_0305600	PF3D7_1446600	0.762
PF3D7_0802300	PF3D7_1213900	0.732
PF3D7_0916700	PF3D7_1148900	0.717
PF3D7_0716200	PF3D7_1005100	0.823
PF3D7_0204500	PF3D7_1324900	0.973
PF3D7_0929400	PF3D7_0935800	0.982
PF3D7_0717500	PF3D7_1007300	0.788
PF3D7_0318200	PF3D7_1231600	0.936
PF3D7_1028200	PF3D7_1346900	0.772
PF3D7_0203200	PF3D7_0206200	0.751
PF3D7_0413500	PF3D7_1451700	0.713
PF3D7_0316700	PF3D7_1340800	0.793
PF3D7_0323400	PF3D7_1014100	0.971
PF3D7_1351700	PF3D7_1452000	0.888
PF3D7_0207800	PF3D7_0802600	0.731
PF3D7_0727200	PF3D7_1415800	0.759
PF3D7_0207500	PF3D7_1227000	0.763
PF3D7_0524400	PF3D7_1211800	0.72
PF3D7_1001400	PF3D7_1253300	0.851
PF3D7_1304900	PF3D7_1415200	0.864
PF3D7_0308300	PF3D7_1222700	0.735
PF3D7_0415900	PF3D7_1434300	0.738
PF3D7_0506100	PF3D7_1217200	0.738
PF3D7_0932000	PF3D7_1461400	0.863
PF3D7_0931100	PF3D7_1251500	0.978
PF3D7_0305700	PF3D7_0316800	0.704
PF3D7_0103800	PF3D7_1211800	0.705
PF3D7_0312800	PF3D7_1206600	0.845
PF3D7_0614000	PF3D7_1365400	0.702
PF3D7_1143300	PF3D7_1439100	0.925
PF3D7_0518500	PF3D7_1355800	0.9
PF3D7_0620400	PF3D7_1468400	0.87
PF3D7_1020700	PF3D7_1028300	0.799
PF3D7_0419600	PF3D7_1242700	0.834
PF3D7_1123400	PF3D7_1460300	0.907
PF3D7_1212000	PF3D7_1338300	0.741
PF3D7_1035700	PF3D7_1222700	0.77
PF3D7_0704300	PF3D7_1355100	0.73
PF3D7_1361700	PF3D7_1364100	0.877
PF3D7_0617000	PF3D7_1215300	0.712
PF3D7_0630500	PF3D7_0816000	0.99
PF3D7_1036500	PF3D7_1413700	0.755
PF3D7_1310800	PF3D7_1407500	0.718
PF3D7_1234800	PF3D7_1414800	0.996
PF3D7_0206000	PF3D7_1226600	0.971
PF3D7_0816000	PF3D7_1124800	0.932
PF3D7_0108000	PF3D7_1008400	0.997
PF3D7_1127100	PF3D7_1433500	0.852
PF3D7_0501100.2	PF3D7_1102700	0.77
PF3D7_0716200	PF3D7_0936300	0.744
PF3D7_0522300	PF3D7_0523000	0.727
PF3D7_1132200	PF3D7_1317800	0.756
PF3D7_0512700	PF3D7_1308200	0.985
PF3D7_0300100	PF3D7_0400100	0.714
PF3D7_0108000	PF3D7_0608500	0.999
PF3D7_0315100	PF3D7_0413600	0.947
PF3D7_0419700	PF3D7_1136200	0.916
PF3D7_0212300	PF3D7_1211800	0.836
PF3D7_1019400	PF3D7_1027800	0.999
PF3D7_0503600	PF3D7_1036000	0.901
PF3D7_0705700	PF3D7_1406000	0.937
PF3D7_0721600	PF3D7_1350100	0.703
PF3D7_0915100	PF3D7_1237000	0.999
PF3D7_0508000	PF3D7_0805700	0.847
PF3D7_0509400	PF3D7_0827000	0.814
PF3D7_0919300	PF3D7_1231200	0.712
PF3D7_0403800	PF3D7_0423800	0.792
PF3D7_0207600	PF3D7_1128900	0.776
PF3D7_0515700	PF3D7_1238600	0.896
PF3D7_1251200	PF3D7_1461400	0.902
PF3D7_1211800	PF3D7_1414000	0.816
PF3D7_0319100	PF3D7_0812600	0.786
PF3D7_0402300	PF3D7_0818100	0.944
PF3D7_0516200	PF3D7_0903900	0.999
PF3D7_1308000	PF3D7_1409400	0.813
PF3D7_0509400	PF3D7_1130200	0.791
PF3D7_1009000	PF3D7_1413800	0.945
PF3D7_0220800	PF3D7_0607700	0.747
PF3D7_0905400	PF3D7_1136700.2	0.744
PF3D7_0516200	PF3D7_0519100	0.996
PF3D7_0108500	PF3D7_1401400	0.91
PF3D7_1123900	PF3D7_1213700	0.987
PF3D7_0507100	PF3D7_1348300	0.956
PF3D7_0729300	PF3D7_0814300	0.889
PF3D7_0822900	PF3D7_1026600	0.91
PF3D7_0905100	PF3D7_1211800	0.749
PF3D7_0612700	PF3D7_1335100	0.888
PF3D7_0822900	PF3D7_1327300	0.751
PF3D7_0207600	PF3D7_0707300	0.83
PF3D7_1134100	PF3D7_1433500	0.817
PF3D7_0802800	PF3D7_1119500	0.915
PF3D7_0527200	PF3D7_0807500	0.975
PF3D7_0501500	PF3D7_0611600	0.801
PF3D7_0309600	PF3D7_1441200	0.998
PF3D7_0721300	PF3D7_1134700	0.97
PF3D7_0302500	PF3D7_0611600	0.713
PF3D7_0204100	PF3D7_1323700	0.87
PF3D7_0506100	PF3D7_1302600	0.742
PF3D7_0511000	PF3D7_1358800	0.911
PF3D7_0914400	PF3D7_1017100	0.725
PF3D7_1036000	PF3D7_1133400	0.959
PF3D7_0423500	PF3D7_1126700	0.763
PF3D7_0704500	PF3D7_0817700	0.768
PF3D7_0312800	PF3D7_1245400	0.976
PF3D7_1315800	PF3D7_1428800.2	0.773
PF3D7_1246800	PF3D7_1338200	0.9
PF3D7_1318800	PF3D7_1450100	0.92
PF3D7_0411000	PF3D7_1148700	0.783
PF3D7_1367400	PF3D7_1463400	0.722
PF3D7_0108500	PF3D7_0202500	0.953
PF3D7_0213900	PF3D7_1412600	0.788
PF3D7_0822900	PF3D7_1335300	0.842
PF3D7_0614500	PF3D7_0719600	0.999
PF3D7_1124400	PF3D7_1239900	0.761
PF3D7_0507400	PF3D7_1238900	0.821
PF3D7_1348600	PF3D7_1412000	0.851
PF3D7_0626800	PF3D7_1124500	0.977
PF3D7_0827000	PF3D7_1466700	0.954
PF3D7_1332200	PF3D7_1459900	0.882
PF3D7_0519200	PF3D7_1235700	0.988
PF3D7_0206600	PF3D7_1410200	0.939
PF3D7_0630500	PF3D7_0814300	0.899
PF3D7_0520500	PF3D7_1012600	0.8
PF3D7_0625400	PF3D7_1221900	0.795
PF3D7_1035700	PF3D7_1228600	0.83
PF3D7_0711000	PF3D7_1134100	0.737
PF3D7_0719600	PF3D7_1447000	0.999
PF3D7_0721300	PF3D7_1471000	0.773
PF3D7_0304100	PF3D7_1243700	0.895
PF3D7_0309500	PF3D7_1211800	0.771
PF3D7_1031800	PF3D7_1323700	0.726
PF3D7_0920800	PF3D7_1324000	0.746
PF3D7_1136200	PF3D7_1222700	0.723
PF3D7_1137100	PF3D7_1142600	0.739
PF3D7_1129400	PF3D7_1132200	0.869
PF3D7_0320900	PF3D7_0417200	0.795
PF3D7_0306800	PF3D7_0516900	0.835
PF3D7_0613900	PF3D7_0817600	0.815
PF3D7_0405900	PF3D7_1430200	0.84
PF3D7_1357700	PF3D7_1454200	0.716
PF3D7_1005500	PF3D7_1308900	0.967
PF3D7_0826700	PF3D7_1451100	0.995
PF3D7_0414900	PF3D7_1136200	0.781
PF3D7_1204600	PF3D7_1311700	0.767
PF3D7_0304100	PF3D7_0817700	0.847
PF3D7_0614500	PF3D7_1004000	0.999
PF3D7_0207700	PF3D7_0704500	0.894
PF3D7_0302200	PF3D7_1463900	0.818
PF3D7_1125500	PF3D7_1306900	0.8
PF3D7_0501300	PF3D7_1038800	0.718
PF3D7_0613900	PF3D7_1335300	0.87
PF3D7_1009700	PF3D7_1133400	0.762
PF3D7_1003800	PF3D7_1126200	0.96
PF3D7_0528400	PF3D7_1009700	0.91
PF3D7_0413600	PF3D7_1312900	0.917
PF3D7_0528300	PF3D7_1145200	0.826
PF3D7_0821600	PF3D7_1438500	0.981
PF3D7_0630400	PF3D7_0704500	0.766
PF3D7_0102200	PF3D7_1038400	0.719
PF3D7_1221900	PF3D7_1407900	0.744
PF3D7_0923000	PF3D7_1234800	0.928
PF3D7_1235200	PF3D7_1238000	0.761
PF3D7_0602100	PF3D7_1359300	0.78
PF3D7_0922600	PF3D7_1367500	0.846
PF3D7_0508800	PF3D7_1361900	0.928
PF3D7_1324900	PF3D7_1433500	0.842
PF3D7_0516900	PF3D7_1142500	0.934
PF3D7_0614500	PF3D7_1210000	0.826
PF3D7_0920800	PF3D7_1033100	0.817
PF3D7_0830500	PF3D7_1407900	0.743
PF3D7_1341500	PF3D7_1468400	0.868
PF3D7_0218500	PF3D7_0323500	0.718
PF3D7_0515400	PF3D7_1461400	0.875
PF3D7_0515700	PF3D7_1409300	0.769
PF3D7_1344300	PF3D7_1345600	0.87
PF3D7_0624000	PF3D7_0922500	0.814
PF3D7_0919900	PF3D7_1141800	0.744
PF3D7_0817700	PF3D7_0913800	0.728
PF3D7_1227800	PF3D7_1302700	0.772
PF3D7_1211700	PF3D7_1412100	0.773
PF3D7_1004000	PF3D7_1246800	0.9
PF3D7_1347300	PF3D7_1441800	0.824
PF3D7_1123900	PF3D7_1247900	0.771
PF3D7_0311300	PF3D7_1437200	0.754
PF3D7_0321400	PF3D7_0810300	0.87
PF3D7_1026800	PF3D7_1302800	0.999
PF3D7_0105400.2	PF3D7_1133400	0.745
PF3D7_0106000	PF3D7_1307900	0.751
PF3D7_0602400	PF3D7_1130200	0.889
PF3D7_0825500	PF3D7_1330800	0.809
PF3D7_0816000	PF3D7_1134700	0.988
PF3D7_1343100	PF3D7_1343200	0.723
PF3D7_0502000	PF3D7_0935200	0.989
PF3D7_0831600	PF3D7_1028700	0.868
PF3D7_1009700	PF3D7_1455300	0.835
PF3D7_0704300	PF3D7_0805700	0.87
PF3D7_0413900	PF3D7_1365900	0.708
PF3D7_0905400	PF3D7_1009700	0.901
PF3D7_1327400	PF3D7_1421900	0.727
PF3D7_1025600	PF3D7_1439000	0.85
PF3D7_0703900	PF3D7_1302700	0.728
PF3D7_0921200	PF3D7_1324000	0.771
PF3D7_0502400	PF3D7_0830500	0.909
PF3D7_0407200	PF3D7_1113400	0.72
PF3D7_0607000	PF3D7_1004000	0.943
PF3D7_1130200	PF3D7_1426200	0.812
PF3D7_1002100	PF3D7_1016800	0.862
PF3D7_0805700	PF3D7_1452000	0.724
PF3D7_0802600	PF3D7_1345600	0.854
PF3D7_0418200	PF3D7_1342000	0.781
PF3D7_0708800	PF3D7_1039100	0.748
PF3D7_0916000	PF3D7_1243700	0.819
PF3D7_0817700	PF3D7_1315300	0.739
PF3D7_1015600	PF3D7_1330600	0.762
PF3D7_1365900	PF3D7_1461300	0.999
PF3D7_1003100	PF3D7_1334900	0.705
PF3D7_0522800	PF3D7_1232400	0.901
PF3D7_0722200	PF3D7_1321500.2	0.755
PF3D7_0309600	PF3D7_0611700	0.999
PF3D7_0807100	PF3D7_1308900	0.718
PF3D7_0819100	PF3D7_1022600	0.734
PF3D7_0501100.2	PF3D7_0507200	0.717
PF3D7_0419200	PF3D7_1321800	0.922
PF3D7_0415900	PF3D7_1406000	0.937
PF3D7_1323100	PF3D7_1431700	0.999
PF3D7_1335100	PF3D7_1472600	0.894
PF3D7_0509400	PF3D7_1363400	0.791
PF3D7_0716800	PF3D7_1243600	0.997
PF3D7_0612900	PF3D7_0703900	0.729
PF3D7_0214200	PF3D7_0821700	0.757
PF3D7_0622200	PF3D7_1469300	0.736
PF3D7_1203900	PF3D7_1211800	0.925
PF3D7_0711000	PF3D7_1113400	0.736
PF3D7_0321400	PF3D7_1252100	0.868
PF3D7_0509600	PF3D7_1104000	0.804
PF3D7_0217500	PF3D7_0316000	0.759
PF3D7_1224300	PF3D7_1460300	0.907
PF3D7_1312900	PF3D7_1474800	0.9
PF3D7_0419400	PF3D7_1133300	0.794
PF3D7_0929400	PF3D7_1001600	0.724
PF3D7_0308300	PF3D7_0507500	0.895
PF3D7_0814300	PF3D7_1134700	0.789
PF3D7_0934000	PF3D7_1416800	0.904
PF3D7_0424300	PF3D7_0911100	0.862
PF3D7_0717900	PF3D7_1149400	0.723
PF3D7_0802800	PF3D7_0817600	0.918
PF3D7_0219200	PF3D7_0312800	0.975
PF3D7_0402100	PF3D7_1115800	0.844
PF3D7_0803500	PF3D7_1251200	0.75
PF3D7_0731600	PF3D7_1238800	0.916
PF3D7_0607000	PF3D7_1103100	0.915
PF3D7_0414800	PF3D7_1125700	0.8
PF3D7_0821700	PF3D7_1302800	0.965
PF3D7_1308300	PF3D7_1468700	0.958
PF3D7_0419300	PF3D7_0917100	0.772
PF3D7_1030000	PF3D7_1227800	0.716
PF3D7_0613800	PF3D7_1029900	0.87
PF3D7_1207600	PF3D7_1434100	0.756
PF3D7_0802300	PF3D7_1206200	0.708
PF3D7_1348300	PF3D7_1424400	0.706
PF3D7_1332700	PF3D7_1357700	0.927
PF3D7_0311300	PF3D7_1440100	0.736
PF3D7_0513800	PF3D7_1332300	0.714
PF3D7_1330800	PF3D7_1417500	0.869
PF3D7_0212600	PF3D7_0423800	0.718
PF3D7_0405200	PF3D7_0722200	0.788
PF3D7_0820000	PF3D7_1213700	0.92
PF3D7_0922200	PF3D7_1211800	0.869
PF3D7_1218000	PF3D7_1301600	0.928
PF3D7_0528200	PF3D7_1408600	0.959
PF3D7_1213800	PF3D7_1416800	0.951
PF3D7_0622800	PF3D7_1033100	0.733
PF3D7_0423500	PF3D7_0506900	0.781
PF3D7_0322900	PF3D7_1451100	0.995
PF3D7_0323400	PF3D7_0808200	0.961
PF3D7_0822300	PF3D7_1231500	0.96
PF3D7_0528100	PF3D7_1245800	0.703
PF3D7_1246800	PF3D7_1358800	0.904
PF3D7_0914300	PF3D7_1119100	0.747
PF3D7_1008900	PF3D7_1323100	0.722
PF3D7_0913500	PF3D7_0931800	0.73
PF3D7_0220800	PF3D7_1361800	0.891
PF3D7_1245400	PF3D7_1367600	0.961
PF3D7_0703900	PF3D7_1454200	0.73
PF3D7_0730800.2	PF3D7_1401100	0.904
PF3D7_1319300	PF3D7_1344900	0.745
PF3D7_0622800	PF3D7_1329000	0.762
PF3D7_1016000	PF3D7_1307500	0.877
PF3D7_1035900	PF3D7_1351700	0.858
PF3D7_0920800	PF3D7_1225100	0.827
PF3D7_0613400	PF3D7_1408600	0.889
PF3D7_0814000	PF3D7_1224300	0.945
PF3D7_0108300	PF3D7_1140700	0.727
PF3D7_0716100	PF3D7_1333600	0.777
PF3D7_1222300	PF3D7_1413900	0.754
PF3D7_0727200	PF3D7_0802300	0.745
PF3D7_0507200	PF3D7_1310200	0.713
PF3D7_1012300	PF3D7_1462700	0.854
PF3D7_1029600	PF3D7_1329400	0.715
PF3D7_0508000	PF3D7_1463900	0.719
PF3D7_0822300	PF3D7_0909800	0.999
PF3D7_0320900	PF3D7_0823300	0.936
PF3D7_1436600	PF3D7_1472600	0.932
PF3D7_0705700	PF3D7_1124900	0.999
PF3D7_0532300	PF3D7_1302000	0.748
PF3D7_0321400	PF3D7_0618000	0.826
PF3D7_0918300	PF3D7_1144500	0.703
PF3D7_0405200	PF3D7_0803200	0.817
PF3D7_1012700	PF3D7_1014400	0.78
PF3D7_0416600	PF3D7_1251300	0.906
PF3D7_1107100	PF3D7_1323700	0.736
PF3D7_0721600	PF3D7_1242700	0.999
PF3D7_0502800	PF3D7_1433500	0.721
PF3D7_0317600	PF3D7_1123400	0.927
PF3D7_0513300	PF3D7_1439900	0.886
PF3D7_0801500	PF3D7_1134700	0.911
PF3D7_0307700	PF3D7_1317100	0.772
PF3D7_0919400	PF3D7_1134100	0.993
PF3D7_0727200	PF3D7_1139700	0.763
PF3D7_0310700	PF3D7_0512600	0.784
PF3D7_0817600	PF3D7_0831600	0.846
PF3D7_1145200	PF3D7_1344300	0.87
PF3D7_0405000	PF3D7_1404500	0.743
PF3D7_0507200	PF3D7_0817700	0.878
PF3D7_1027800	PF3D7_1109900	0.999
PF3D7_0507700	PF3D7_1032500	0.903
PF3D7_0106800	PF3D7_1242800	0.989
PF3D7_1020700	PF3D7_1357700	0.999
PF3D7_0509400	PF3D7_1331100	0.902
PF3D7_0812400	PF3D7_1107700	0.705
PF3D7_0305600	PF3D7_0411900	0.884
PF3D7_0411400	PF3D7_1415200	0.927
PF3D7_0707900	PF3D7_0716100	0.988
PF3D7_0826700	PF3D7_1414300	0.999
PF3D7_1031400.2	PF3D7_1436600	0.758
PF3D7_1025900	PF3D7_1145200	0.925
PF3D7_1134000	PF3D7_1238100	0.77
PF3D7_0806300	PF3D7_1107100	0.748
PF3D7_0717600	PF3D7_1228600	0.765
PF3D7_0109800	PF3D7_0913900	0.761
PF3D7_1012600	PF3D7_1146000	0.714
PF3D7_0422400	PF3D7_1312900	0.92
PF3D7_0805200	PF3D7_1243700	0.77
PF3D7_1026600	PF3D7_1035900	0.889
PF3D7_0721600	PF3D7_1367600	0.987
PF3D7_0402300	PF3D7_1036500	0.83
PF3D7_0830500	PF3D7_1401400	0.912
PF3D7_1312900	PF3D7_1365900	0.916
PF3D7_0814000	PF3D7_1434300	0.858
PF3D7_1329000	PF3D7_1459000	0.931
PF3D7_0818100	PF3D7_0828800	0.944
PF3D7_0207800	PF3D7_1012200	0.729
PF3D7_0416800	PF3D7_0512600	0.717
PF3D7_1318800	PF3D7_1473200	0.738
PF3D7_1406600	PF3D7_1434300	0.942
PF3D7_0610800	PF3D7_1211800	0.721
PF3D7_0731500	PF3D7_1149200	0.888
PF3D7_0805300	PF3D7_1246400	0.76
PF3D7_0318200	PF3D7_1357000	0.82
PF3D7_0801500	PF3D7_1206600	0.715
PF3D7_1352500	PF3D7_1412700	0.701
PF3D7_0622200	PF3D7_1317900	0.709
PF3D7_0528300	PF3D7_1126700	0.847
PF3D7_1031400.2	PF3D7_1145200	0.875
PF3D7_1232500	PF3D7_1247500	0.774
PF3D7_1012600	PF3D7_1466700	0.802
PF3D7_0506100	PF3D7_1020700	0.737
PF3D7_0417200	PF3D7_1416800	0.72
PF3D7_0204100	PF3D7_1410400	0.891
PF3D7_0816000	PF3D7_1309500	0.708
PF3D7_1143400	PF3D7_1451100	0.703
PF3D7_1206200	PF3D7_1342000	0.96
PF3D7_0802300	PF3D7_0819100	0.734
PF3D7_1035700	PF3D7_1431400	0.723
PF3D7_0821500	PF3D7_1129400	0.727
PF3D7_0817600	PF3D7_1012200	0.899
PF3D7_0528400	PF3D7_1036000	0.797
PF3D7_0215700	PF3D7_1227800	0.803
PF3D7_0300100	PF3D7_0412900	0.906
PF3D7_1113300	PF3D7_1331600	0.784
PF3D7_0501600	PF3D7_1252100	0.918
PF3D7_0207500	PF3D7_1001600	0.881
PF3D7_1003500	PF3D7_1366600	0.933
PF3D7_0528300	PF3D7_1009700	0.797
PF3D7_1030100	PF3D7_1461600	0.709
PF3D7_1028300	PF3D7_1448000	0.806
PF3D7_0404900	PF3D7_1471400	0.768
PF3D7_0305600	PF3D7_0504900	0.746
PF3D7_0607000	PF3D7_1109900	0.922
PF3D7_0824600	PF3D7_1128500	0.764
PF3D7_1015300	PF3D7_1451100	0.725
PF3D7_0719700	PF3D7_1216300	0.909
PF3D7_1237700	PF3D7_1306200	0.72
PF3D7_0622800	PF3D7_1218600	0.877
PF3D7_0727200	PF3D7_1134000	0.884
PF3D7_0516900	PF3D7_0818900	0.783
PF3D7_0621800	PF3D7_0814000	0.709
PF3D7_1129200	PF3D7_1474800	0.999
PF3D7_1235200	PF3D7_1439500	0.752
PF3D7_0318200	PF3D7_0319300	0.742
PF3D7_1125700	PF3D7_1423300	0.901
PF3D7_1012600	PF3D7_1308200	0.99
PF3D7_1212500	PF3D7_1323000	0.74
PF3D7_1224300	PF3D7_1365900	0.938
PF3D7_1015800	PF3D7_1231600	0.927
PF3D7_0207000	PF3D7_1335100	0.816
PF3D7_1218600	PF3D7_1442300	0.826
PF3D7_0911100	PF3D7_1344300	0.809
PF3D7_1353200	PF3D7_1401400	0.889
PF3D7_0405400	PF3D7_1343900	0.992
PF3D7_1237600	PF3D7_1357700	0.927
PF3D7_0212900	PF3D7_0802800	0.71
PF3D7_0818200	PF3D7_1219100	0.736
PF3D7_1352200	PF3D7_1357700	0.999
PF3D7_1311900	PF3D7_1419800.2	0.745
PF3D7_0220800	PF3D7_0515700	0.832
PF3D7_1211800	PF3D7_1343000	0.792
PF3D7_1013800	PF3D7_1335100	0.792
PF3D7_1204900	PF3D7_1238900	0.814
PF3D7_0804800	PF3D7_0821600	0.722
PF3D7_0516500	PF3D7_1104800	0.702
PF3D7_0710600	PF3D7_1365900	0.999
PF3D7_0408000	PF3D7_0911100	0.785
PF3D7_1126700	PF3D7_1342600	0.913
PF3D7_0519200	PF3D7_1456800	0.918
PF3D7_0618000	PF3D7_1345600	0.816
PF3D7_1025400	PF3D7_1436600	0.899
PF3D7_1008400	PF3D7_1353900	0.996
PF3D7_0308900	PF3D7_0619900	0.993
PF3D7_1346100	PF3D7_1429800	0.8
PF3D7_0905400	PF3D7_1238000	0.718
PF3D7_1315300	PF3D7_1449100	0.754
PF3D7_0919400	PF3D7_1422500	0.79
PF3D7_0728000	PF3D7_1445100	0.993
PF3D7_0928900	PF3D7_1015800	0.975
PF3D7_0920100	PF3D7_1318800	0.719
PF3D7_0315400	PF3D7_1427900	0.777
PF3D7_0423500	PF3D7_1243700	0.841
PF3D7_0516900	PF3D7_1431000	0.961
PF3D7_1145400	PF3D7_1422800	0.796
PF3D7_0414800	PF3D7_1243700	0.782
PF3D7_0620400	PF3D7_1117400	0.707
PF3D7_0935000	PF3D7_1030100	0.963
PF3D7_0932100	PF3D7_1463900	0.755
PF3D7_0214200	PF3D7_1431000	0.965
PF3D7_0726900	PF3D7_1009600	0.799
PF3D7_1307600	PF3D7_1431000	0.946
PF3D7_0110900	PF3D7_1109400	0.756
PF3D7_0831600	PF3D7_1107100	0.727
PF3D7_0407800	PF3D7_1029900	0.899
PF3D7_1129200	PF3D7_1365900	0.945
PF3D7_0806200	PF3D7_1035700	0.704
PF3D7_0424100	PF3D7_1468400	0.92
PF3D7_0405400	PF3D7_1229500	0.784
PF3D7_0511000	PF3D7_1341300	0.75
PF3D7_0308700	PF3D7_0808200	0.806
PF3D7_1019400	PF3D7_1110600	0.871
PF3D7_0422700	PF3D7_1460700	0.931
PF3D7_0213100	PF3D7_0818900	0.957
PF3D7_0411000	PF3D7_1408200	0.725
PF3D7_0516200	PF3D7_1007900	0.957
PF3D7_1111100	PF3D7_1251300	0.715
PF3D7_1107700	PF3D7_1405800	0.999
PF3D7_0320300	PF3D7_1447000	0.902
PF3D7_0912800	PF3D7_1013100	0.714
PF3D7_0813900	PF3D7_1426000	0.999
PF3D7_0729300	PF3D7_1225500	0.719
PF3D7_0323400	PF3D7_0805300	0.778
PF3D7_0705100	PF3D7_1409300	0.722
PF3D7_0202500	PF3D7_0830500	0.926
PF3D7_0206200	PF3D7_0618000	0.87
PF3D7_0110400	PF3D7_1410200	0.931
PF3D7_0515000	PF3D7_1224300	0.836
PF3D7_1109400	PF3D7_1225500	0.986
PF3D7_0522400	PF3D7_1252100	0.801
PF3D7_0727400	PF3D7_1224300	0.9
PF3D7_0818100	PF3D7_1022700	0.763
PF3D7_1251300	PF3D7_1405600	0.952
PF3D7_0527100	PF3D7_0704600	0.772
PF3D7_0708800	PF3D7_1447000	0.76
PF3D7_0506900	PF3D7_0924500	0.761
PF3D7_0527000	PF3D7_0904800	0.721
PF3D7_0613400	PF3D7_1144000	0.937
PF3D7_0322900	PF3D7_1243600	0.745
PF3D7_0821300	PF3D7_1327700	0.704
[truncated: 44,314 more rows]

## Sheet: LR_network
Gene1	Gene2	Score
PF3D7_0903900	PF3D7_1331300	0.9
PF3D7_0918000	PF3D7_1436600	0.759
PF3D7_1134000	PF3D7_1149600	0.824
PF3D7_0714500	PF3D7_1037600	0.71
PF3D7_0919300	PF3D7_1017500	0.895
PF3D7_0409400	PF3D7_1356700	0.749
PF3D7_1026600	PF3D7_1327300	0.737
PF3D7_0322900	PF3D7_1341300	0.999
PF3D7_0812500	PF3D7_1474500	0.82
PF3D7_0716100	PF3D7_1251500	0.971
PF3D7_0415900	PF3D7_0830400	0.703
PF3D7_0312800	PF3D7_0323000	0.706
PF3D7_0322900	PF3D7_1460300	0.995
PF3D7_1224400	PF3D7_1428300	0.798
PF3D7_1308200	PF3D7_1351400	0.788
PF3D7_1211800	PF3D7_1305300	0.763
PF3D7_0206700	PF3D7_1308200	0.804
PF3D7_1308200	PF3D7_1448000	0.76
PF3D7_0816000	PF3D7_1407100	0.829
PF3D7_1211800	PF3D7_1426000	0.878
PF3D7_1246400	PF3D7_1423300	0.78
PF3D7_0520100	PF3D7_1009600	0.769
PF3D7_0630500	PF3D7_1421400	0.782
PF3D7_0415500	PF3D7_1302800	0.92
PF3D7_0917600	PF3D7_1445900	0.77
PF3D7_1116800	PF3D7_1357800	0.704
PF3D7_1338300	PF3D7_1358800	0.896
PF3D7_0729300	PF3D7_1106300	0.749
PF3D7_1118200	PF3D7_1465900	0.703
PF3D7_0423800	PF3D7_0930300	0.811
PF3D7_0802600	PF3D7_1365600	0.781
PF3D7_1023200	PF3D7_1129400	0.708
PF3D7_0212600	PF3D7_0932000	0.767
PF3D7_1354300	PF3D7_1445900	0.884
PF3D7_1148900	PF3D7_1427100	0.74
PF3D7_1367400	PF3D7_1431300	0.725
PF3D7_1215300	PF3D7_1344200	0.868
PF3D7_1224300	PF3D7_1323100	0.93
PF3D7_0505000	PF3D7_1429500	0.707
PF3D7_0320100	PF3D7_1316200	0.823
PF3D7_1035300	PF3D7_1222700	0.825
PF3D7_0507200	PF3D7_1128900	0.886
PF3D7_1001800	PF3D7_1010300	0.711
PF3D7_0308600	PF3D7_0319500	0.969
PF3D7_1364800	PF3D7_1417500	0.855
PF3D7_1030500	PF3D7_1365900	0.947
PF3D7_0308200	PF3D7_0920800	0.895
PF3D7_0316800	PF3D7_1330600	0.925
PF3D7_0722200	PF3D7_0918000	0.743
PF3D7_1016000	PF3D7_1126700	0.874
PF3D7_0516900	PF3D7_1242700	0.999
PF3D7_0303000	PF3D7_0903200	0.85
PF3D7_0705700	PF3D7_0728000	0.919
PF3D7_0630900	PF3D7_1247900	0.786
PF3D7_0618500	PF3D7_1342800	0.802
PF3D7_1308200	PF3D7_1434500	0.716
PF3D7_0515700	PF3D7_1436600	0.9
PF3D7_0624500	PF3D7_1211800	0.734
PF3D7_0817600	PF3D7_0934800	0.887
PF3D7_0724400	PF3D7_0818900	0.774
PF3D7_0803500	PF3D7_1014100	0.755
PF3D7_0802800	PF3D7_1436600	0.912
PF3D7_0219200	PF3D7_1027800	0.961
PF3D7_0908700	PF3D7_1417500	0.812
PF3D7_0424100	PF3D7_1410400	0.811
PF3D7_0416500	PF3D7_1224100	0.719
PF3D7_1003600	PF3D7_1351700	0.901
PF3D7_1034900	PF3D7_1331700	0.954
PF3D7_1200700	PF3D7_1253400	0.91
PF3D7_0907500	PF3D7_1204900	0.722
PF3D7_0818800	PF3D7_1249900	0.787
PF3D7_0219700	PF3D7_0918700	0.872
PF3D7_1202200	PF3D7_1439400	0.843
PF3D7_0403700	PF3D7_1468800	0.983
PF3D7_1309100	PF3D7_1424400	0.999
PF3D7_1134000	PF3D7_1404100	0.722
PF3D7_1133700	PF3D7_1404800	0.781
PF3D7_0506900	PF3D7_1343100	0.711
PF3D7_0920800	PF3D7_1357800	0.923
PF3D7_1224100	PF3D7_1438400	0.735
PF3D7_0106100	PF3D7_1211800	0.862
PF3D7_1035000	PF3D7_1129400	0.805
PF3D7_0719600	PF3D7_1358800	0.999
PF3D7_0518500	PF3D7_1234800	0.919
PF3D7_0405400	PF3D7_0822800	0.999
PF3D7_1037100	PF3D7_1418900	0.9
PF3D7_0424700	PF3D7_0730800.2	0.863
PF3D7_1003500	PF3D7_1123900	0.84
PF3D7_1224300	PF3D7_1308900	0.747
PF3D7_1421900	PF3D7_1475300	0.724
PF3D7_1231500	PF3D7_1420000	0.9
PF3D7_1331800	PF3D7_1433600	0.9
PF3D7_1361900	PF3D7_1437200	0.986
PF3D7_1206600	PF3D7_1439100	0.927
PF3D7_1028700	PF3D7_1246400	0.94
PF3D7_0913500	PF3D7_1130400	0.753
PF3D7_0507200	PF3D7_1471400	0.762
PF3D7_0217500	PF3D7_0817600	0.875
PF3D7_0501300	PF3D7_1251500	0.735
PF3D7_1217200	PF3D7_1461200	0.873
PF3D7_0415900	PF3D7_1011800	0.811
PF3D7_0512600	PF3D7_1008700	0.778
PF3D7_0721600	PF3D7_1421200	0.998
PF3D7_0532300	PF3D7_1436000	0.756
PF3D7_1033600	PF3D7_1033700	0.925
PF3D7_0828800	PF3D7_1222700	0.871
PF3D7_0814900	PF3D7_1454500	0.812
PF3D7_0803000	PF3D7_1118200	0.972
PF3D7_0419700	PF3D7_1469200	0.792
PF3D7_0725400	PF3D7_1017500	0.887
PF3D7_0918900	PF3D7_1446200	0.903
PF3D7_0509000	PF3D7_1324700	0.943
PF3D7_0621300	PF3D7_0813400	0.707
PF3D7_0210600	PF3D7_0528400	0.847
PF3D7_0113300	PF3D7_1404800	0.72
PF3D7_0528400	PF3D7_0822900	0.876
PF3D7_1318800	PF3D7_1344200	0.842
PF3D7_0220100	PF3D7_0708800	0.813
PF3D7_0423800	PF3D7_0911100	0.92
PF3D7_1103100	PF3D7_1365900	0.984
PF3D7_0409400	PF3D7_0921800	0.801
PF3D7_1341200	PF3D7_1424100	0.999
PF3D7_0814300	PF3D7_0931100	0.839
PF3D7_0113700	PF3D7_1344200	0.952
PF3D7_0627800	PF3D7_1342800	0.887
PF3D7_1037500	PF3D7_1238600	0.713
PF3D7_0818900	PF3D7_1118200	0.945
PF3D7_0501600	PF3D7_0905400	0.959
PF3D7_0903900	PF3D7_1123400	0.933
PF3D7_1009700	PF3D7_1238600	0.868
PF3D7_0823300	PF3D7_1105000	0.8
PF3D7_0618300	PF3D7_1004000	0.999
PF3D7_1037100	PF3D7_1426700	0.978
PF3D7_0519400	PF3D7_1424100	0.998
PF3D7_0708100	PF3D7_1421400	0.966
PF3D7_1009700	PF3D7_1335100	0.854
PF3D7_1008400	PF3D7_1117100	0.979
PF3D7_0515700	PF3D7_1469200	0.724
PF3D7_1019400	PF3D7_1367600	0.906
PF3D7_0909400	PF3D7_1010200	0.827
PF3D7_1110600	PF3D7_1323400	0.976
PF3D7_1031400.2	PF3D7_1439500	0.89
PF3D7_0105800	PF3D7_0317200	0.847
PF3D7_0606200	PF3D7_1361900	0.778
PF3D7_0614500	PF3D7_1308300	0.999
PF3D7_1367400	PF3D7_1412500	0.713
PF3D7_1035300	PF3D7_1313500	0.819
PF3D7_0716200	PF3D7_1220500	0.77
PF3D7_1427800	PF3D7_1449700	0.944
PF3D7_1013100	PF3D7_1129400	0.971
PF3D7_0210700	PF3D7_1231100	0.733
PF3D7_1324900	PF3D7_1345700	0.888
PF3D7_0316800	PF3D7_1346100	0.919
PF3D7_0729400	PF3D7_1027100	0.785
PF3D7_1106000	PF3D7_1118600	0.917
PF3D7_0303300	PF3D7_1231500	0.903
PF3D7_1460700	PF3D7_1465900	0.999
PF3D7_0630500	PF3D7_1225500	0.929
PF3D7_0102900	PF3D7_1442300	0.942
PF3D7_0403800	PF3D7_0731500	0.732
PF3D7_0303000	PF3D7_1034000	0.966
PF3D7_1107700	PF3D7_1237600	0.914
PF3D7_1224300	PF3D7_1461300	0.936
PF3D7_0207100	PF3D7_0323400	0.744
PF3D7_1129400	PF3D7_1367600	0.957
PF3D7_0902500	PF3D7_1001800	0.807
PF3D7_0109000	PF3D7_1035700	0.719
PF3D7_0317600	PF3D7_1130200	0.998
PF3D7_0802600	PF3D7_1310200	0.806
PF3D7_0312800	PF3D7_1433600	0.9
PF3D7_0217800	PF3D7_1007900	0.947
PF3D7_1143100	PF3D7_1351700	0.921
PF3D7_1229500	PF3D7_1365900	0.77
PF3D7_1109900	PF3D7_1144300	0.9
PF3D7_1134700	PF3D7_1468700	0.763
PF3D7_0903900	PF3D7_1406000	0.925
PF3D7_1211800	PF3D7_1212700	0.883
PF3D7_0405000	PF3D7_1357700	0.714
PF3D7_1307600	PF3D7_1431800	0.9
PF3D7_0317600	PF3D7_1317800	0.999
PF3D7_0712300	PF3D7_0713200	0.749
PF3D7_0918300	PF3D7_1468700	0.977
PF3D7_0507100	PF3D7_1357100	0.962
PF3D7_1012600	PF3D7_1327600	0.781
PF3D7_0910600	PF3D7_1144900	0.803
PF3D7_0312800	PF3D7_1424400	0.999
PF3D7_1354300	PF3D7_1428300	0.858
PF3D7_1230900	PF3D7_1367400	0.85
PF3D7_0707300	PF3D7_1223100	0.816
PF3D7_0706400	PF3D7_1003500	0.981
PF3D7_1144000	PF3D7_1461200	0.862
PF3D7_0109000	PF3D7_0507400	0.872
PF3D7_1327600	PF3D7_1433500	0.782
PF3D7_0525500	PF3D7_0903400	0.704
PF3D7_0519400	PF3D7_0719600	0.999
PF3D7_1012700	PF3D7_1361000	0.928
PF3D7_0706400	PF3D7_1109900	0.999
PF3D7_0317000	PF3D7_1328100	0.999
PF3D7_0827000	PF3D7_1469300	0.867
PF3D7_0407800	PF3D7_0813100	0.83
PF3D7_0414900	PF3D7_1003600	0.917
PF3D7_1011700	PF3D7_1409300	0.981
PF3D7_0721300	PF3D7_1109400	0.755
PF3D7_0520000	PF3D7_1414300	0.999
PF3D7_1431800	PF3D7_1437200	0.9
PF3D7_0420100	PF3D7_1438000	0.811
PF3D7_0209800	PF3D7_0814200	0.747
PF3D7_0501500	PF3D7_1358400	0.816
PF3D7_1318400	PF3D7_1417800	0.926
PF3D7_0405400	PF3D7_0923000	0.902
PF3D7_0511800	PF3D7_1315600	0.87
PF3D7_0621900	PF3D7_1358200	0.707
PF3D7_0113700	PF3D7_1370300	0.871
PF3D7_0722600	PF3D7_1357700	0.995
PF3D7_1011400	PF3D7_1143400	0.731
PF3D7_0419700	PF3D7_1126700	0.855
PF3D7_1317800	PF3D7_1357100	0.925
PF3D7_1008800	PF3D7_1302800	0.887
PF3D7_0509400	PF3D7_1451900	0.901
PF3D7_0409200	PF3D7_1451900	0.944
PF3D7_0919200	PF3D7_1351700	0.814
PF3D7_1118200	PF3D7_1462800	0.772
PF3D7_0217500	PF3D7_0822900	0.874
PF3D7_0802300	PF3D7_1471000	0.97
PF3D7_1025100	PF3D7_1211800	0.711
PF3D7_0219200	PF3D7_0705700	0.999
PF3D7_0932200	PF3D7_1472600	0.768
PF3D7_0925200	PF3D7_1237600	0.737
PF3D7_0212300	PF3D7_1026800	0.955
PF3D7_0936400	PF3D7_0936500	0.956
PF3D7_0415900	PF3D7_1110600	0.85
PF3D7_0512200	PF3D7_1457200	0.769
PF3D7_0507100	PF3D7_1406000	0.923
PF3D7_0725400	PF3D7_1022700	0.826
PF3D7_0528400	PF3D7_1471400	0.727
PF3D7_0826700	PF3D7_1130200	0.999
PF3D7_0932100	PF3D7_1471400	0.773
PF3D7_0621300	PF3D7_1317900	0.858
PF3D7_1308300	PF3D7_1341200	0.999
PF3D7_1035800	PF3D7_1476200	0.745
PF3D7_1111000	PF3D7_1230500	0.742
PF3D7_1004400	PF3D7_1355800	0.921
PF3D7_0801500	PF3D7_1237600	0.901
PF3D7_0908600	PF3D7_1204600	0.719
PF3D7_0608500	PF3D7_0807500	0.999
PF3D7_1110400	PF3D7_1408100	0.769
PF3D7_0315100	PF3D7_0810600	0.914
PF3D7_1012600	PF3D7_1020400	0.755
PF3D7_1308800	PF3D7_1322000	0.789
PF3D7_0813900	PF3D7_1005500	0.9
PF3D7_0800200	PF3D7_0800300	0.899
PF3D7_0307600	PF3D7_0307700	0.726
PF3D7_0607000	PF3D7_1123900	0.75
PF3D7_0219200	PF3D7_1105400	0.999
PF3D7_0516400	PF3D7_1357800	0.955
PF3D7_0611700	PF3D7_1308300	0.998
PF3D7_0825500	PF3D7_1357700	0.839
PF3D7_0719700	PF3D7_1004000	0.999
PF3D7_1004000	PF3D7_1137100	0.996
PF3D7_0415500	PF3D7_1220100	0.888
PF3D7_0419600	PF3D7_0815200	0.998
PF3D7_1206700	PF3D7_1326400	0.954
PF3D7_0807100	PF3D7_1364300	0.817
PF3D7_1125800	PF3D7_1136900	0.961
PF3D7_0207800	PF3D7_1364100	0.752
PF3D7_1306600	PF3D7_1431800	0.93
PF3D7_0217100	PF3D7_1330600	0.929
PF3D7_0528200	PF3D7_1410600	0.936
PF3D7_1030100	PF3D7_1120500	0.877
PF3D7_0307200	PF3D7_1460700	0.999
PF3D7_0411400	PF3D7_0504400	0.792
PF3D7_0725200	PF3D7_1331800	0.912
PF3D7_0717700	PF3D7_1420400	0.866
PF3D7_0307200	PF3D7_1015300	0.747
PF3D7_0811300	PF3D7_1033700	0.788
PF3D7_1232500	PF3D7_1452000	0.938
PF3D7_0532400	PF3D7_1478600	0.862
PF3D7_1332200	PF3D7_1463900	0.865
PF3D7_0716800	PF3D7_1468700	0.952
PF3D7_0302200	PF3D7_0508000	0.707
PF3D7_0822300	PF3D7_1355800	0.948
PF3D7_0410700	PF3D7_0821500	0.822
PF3D7_1009700	PF3D7_1036000	0.803
PF3D7_0405000	PF3D7_0509400	0.949
PF3D7_1134700	PF3D7_1229500	0.732
PF3D7_0305600	PF3D7_1326000	0.731
PF3D7_1355500	PF3D7_1415800	0.702
PF3D7_0322000	PF3D7_1033400	0.754
PF3D7_0303300	PF3D7_1307600	0.889
PF3D7_0212600	PF3D7_1232500	0.772
PF3D7_1212000	PF3D7_1419800.2	0.959
PF3D7_0207100	PF3D7_0717500	0.738
PF3D7_1028400	PF3D7_1367600	0.998
PF3D7_1009700	PF3D7_1228600	0.881
PF3D7_0822000	PF3D7_1317800	0.999
PF3D7_0708800	PF3D7_1012600	0.908
PF3D7_0206200	PF3D7_1036000	0.897
PF3D7_1010600	PF3D7_1126200	0.97
PF3D7_0905400	PF3D7_1035100	0.892
PF3D7_0502400	PF3D7_0623800	0.786
PF3D7_1312900	PF3D7_1408600	0.916
PF3D7_0109000	PF3D7_1126700	0.901
PF3D7_1103100	PF3D7_1342000	0.995
PF3D7_0320700	PF3D7_1417800	0.774
PF3D7_1001500	PF3D7_1302000	0.831
PF3D7_1143300	PF3D7_1237600	0.718
PF3D7_1142600	PF3D7_1144300	0.9
PF3D7_0214200	PF3D7_1365900	0.995
PF3D7_0319300	PF3D7_1107400	0.915
PF3D7_0717500	PF3D7_1222700	0.808
PF3D7_0719600	PF3D7_1130100	0.999
PF3D7_1213700	PF3D7_1418900	0.907
PF3D7_0516200	PF3D7_1126200	0.999
PF3D7_0420100	PF3D7_0729400	0.714
PF3D7_1125800	PF3D7_1469200	0.887
PF3D7_0612200	PF3D7_0929400	0.87
PF3D7_0203700	PF3D7_1304900	0.804
PF3D7_0729400	PF3D7_1307100	0.827
PF3D7_1125800	PF3D7_1243700	0.927
PF3D7_1228600	PF3D7_1238600	0.894
PF3D7_0525800	PF3D7_1035700	0.786
PF3D7_0818700	PF3D7_1103600	0.991
PF3D7_0817600	PF3D7_0920700	0.814
PF3D7_0410700	PF3D7_1249900	0.799
PF3D7_1144900	PF3D7_1323800	0.982
PF3D7_0831600	PF3D7_1017100	0.87
PF3D7_0307200	PF3D7_0707900	0.867
PF3D7_0818700	PF3D7_1118600	0.776
PF3D7_0108000	PF3D7_1328100	0.999
PF3D7_0729400	PF3D7_0816000	0.999
PF3D7_1129200	PF3D7_1211800	0.987
PF3D7_1027800	PF3D7_1468700	0.793
PF3D7_0513300	PF3D7_1324900	0.92
PF3D7_0422700	PF3D7_1406000	0.933
PF3D7_0920700	PF3D7_1341500	0.751
PF3D7_1324900	PF3D7_1454400	0.81
PF3D7_0708400	PF3D7_1338300	0.928
PF3D7_0517000	PF3D7_0813900	0.999
PF3D7_0212600	PF3D7_0805200	0.896
PF3D7_1033000	PF3D7_1463900	0.723
PF3D7_1125800	PF3D7_1143100	0.956
PF3D7_0610400	PF3D7_0823300	0.826
PF3D7_0102700	PF3D7_1016800	0.802
PF3D7_0110400	PF3D7_1224900	0.934
PF3D7_0217800	PF3D7_1323400	0.985
PF3D7_0105400.2	PF3D7_0802600	0.712
PF3D7_0320300	PF3D7_1445100	0.767
PF3D7_1020400	PF3D7_1028400	0.777
PF3D7_0218400	PF3D7_1217200	0.771
PF3D7_1349400	PF3D7_1366500	0.719
PF3D7_1037500	PF3D7_1133400	0.833
PF3D7_0818400	PF3D7_1307100	0.861
PF3D7_0402100	PF3D7_0918700	0.907
PF3D7_0506100	PF3D7_1028400	0.994
PF3D7_0707900	PF3D7_1308300	0.924
PF3D7_1323100	PF3D7_1431000	0.962
PF3D7_0402300	PF3D7_1035900	0.79
PF3D7_0410700	PF3D7_1407100	0.917
PF3D7_0419700	PF3D7_0506900	0.701
PF3D7_1001400	PF3D7_1401400	0.775
PF3D7_1015900	PF3D7_1307600	0.726
PF3D7_1252300	PF3D7_1476200	0.706
PF3D7_0423800	PF3D7_0731500	0.737
PF3D7_0802300	PF3D7_1469300	0.989
PF3D7_1216300	PF3D7_1424400	0.923
PF3D7_0302500	PF3D7_1344300	0.771
PF3D7_0932000	PF3D7_1332200	0.731
PF3D7_0416500	PF3D7_0919400	0.745
PF3D7_1345700	PF3D7_1430700	0.985
PF3D7_1033100	PF3D7_1218600	0.709
PF3D7_0520000	PF3D7_1329000	0.773
PF3D7_1145200	PF3D7_1238600	0.863
PF3D7_1123400	PF3D7_1142600	0.933
PF3D7_1020700	PF3D7_1408900	0.761
PF3D7_1320100	PF3D7_1364100	0.759
PF3D7_0723800	PF3D7_1220300	0.762
PF3D7_0214000	PF3D7_0423700	0.715
PF3D7_0323400	PF3D7_0932000	0.756
PF3D7_1111100	PF3D7_1438700	0.958
PF3D7_0300100	PF3D7_0800300	0.802
PF3D7_0731500	PF3D7_1002100	0.708
PF3D7_0802800	PF3D7_1035900	0.788
PF3D7_0716800	PF3D7_1107700	0.716
PF3D7_1229500	PF3D7_1311500	0.833
PF3D7_1143300	PF3D7_1366500	0.934
PF3D7_1013800	PF3D7_1430200	0.817
PF3D7_0822000	PF3D7_1447000	0.996
PF3D7_0408000	PF3D7_0525800	0.797
PF3D7_0728000	PF3D7_1213900	0.999
PF3D7_1034900	PF3D7_1445100	0.923
PF3D7_0927300	PF3D7_1037100	0.71
PF3D7_0626800	PF3D7_1241800	0.907
PF3D7_0818900	PF3D7_1462800	0.903
PF3D7_0416400	PF3D7_0821000	0.747
PF3D7_1414300	PF3D7_1426000	0.999
PF3D7_1105600	PF3D7_1149600	0.752
PF3D7_1337800	PF3D7_1469200	0.707
PF3D7_0102500	PF3D7_1035700	0.75
PF3D7_1348600	PF3D7_1358400	0.734
PF3D7_0109000	PF3D7_0920700	0.83
PF3D7_0522300	PF3D7_1350700	0.849
PF3D7_0319300	PF3D7_0415300	0.886
PF3D7_0424900	PF3D7_1411900	0.759
PF3D7_0708400	PF3D7_1334200	0.843
PF3D7_0322900	PF3D7_1132700	0.871
PF3D7_0723400	PF3D7_1359000	0.712
PF3D7_0729300	PF3D7_1237600	0.939
PF3D7_1030100	PF3D7_1357800	0.702
PF3D7_0708400	PF3D7_1434300	0.995
PF3D7_0501500	PF3D7_1003600	0.94
PF3D7_0936200	PF3D7_1368200	0.725
PF3D7_0212600	PF3D7_0503600	0.718
PF3D7_0830500	PF3D7_0935900	0.802
PF3D7_1038800	PF3D7_1221900	0.705
PF3D7_0831200	PF3D7_1433500	0.721
PF3D7_0203200	PF3D7_0934600	0.707
PF3D7_1342700	PF3D7_1439100	0.9
PF3D7_0814000	PF3D7_1428300	0.899
PF3D7_1022600	PF3D7_1469300	0.884
PF3D7_1118600	PF3D7_1417500	0.814
PF3D7_0731500	PF3D7_1455300	0.87
PF3D7_0821000	PF3D7_0908000	0.745
PF3D7_1232500	PF3D7_1313500	0.765
PF3D7_0525800	PF3D7_1222700	0.91
PF3D7_1346900	PF3D7_1446600	0.758
PF3D7_1342000	PF3D7_1367600	0.829
PF3D7_0524000	PF3D7_1233900	0.994
PF3D7_1126200	PF3D7_1317800	0.999
PF3D7_0520600	PF3D7_0708100	0.922
PF3D7_1362200	PF3D7_1461900	0.736
PF3D7_0802800	PF3D7_1136200	0.897
PF3D7_1037500	PF3D7_1145200	0.922
PF3D7_0802800	PF3D7_0905400	0.909
PF3D7_0631500	PF3D7_1404800	0.712
PF3D7_1109400	PF3D7_1247900	0.919
PF3D7_1009700	PF3D7_1017100	0.888
PF3D7_0301800	PF3D7_1149200	0.9
PF3D7_1124900	PF3D7_1338200	0.999
PF3D7_1012600	PF3D7_1119200	0.764
PF3D7_0303000	PF3D7_1113400	0.94
PF3D7_0105800	PF3D7_1033900	0.705
PF3D7_0528400	PF3D7_0612700	0.718
PF3D7_1317800	PF3D7_1357000	0.785
PF3D7_1230600	PF3D7_1448000	0.827
PF3D7_0731200	PF3D7_1002000	0.799
PF3D7_0316800	PF3D7_0903900	0.999
PF3D7_1126700	PF3D7_1323700	0.806
PF3D7_0822000	PF3D7_1408600	0.781
PF3D7_0424800	PF3D7_0902500	0.753
PF3D7_0207000	PF3D7_1035300	0.798
PF3D7_0910800	PF3D7_1454500	0.79
PF3D7_0405900	PF3D7_0501500	0.919
PF3D7_1004000	PF3D7_1441200	0.999
PF3D7_0614500	PF3D7_1424100	0.999
PF3D7_1201500	PF3D7_1302000	0.742
PF3D7_0404900	PF3D7_0506900	0.858
PF3D7_0518300	PF3D7_0818900	0.915
PF3D7_0618300	PF3D7_0814000	0.999
PF3D7_0906600	PF3D7_1230900	0.802
PF3D7_1357100	PF3D7_1465900	0.963
PF3D7_1217200	PF3D7_1367600	0.729
PF3D7_0516200	PF3D7_1365900	0.994
PF3D7_0508000	PF3D7_0817700	0.804
PF3D7_1358800	PF3D7_1433600	0.9
PF3D7_0218400	PF3D7_1417500	0.739
PF3D7_0302200	PF3D7_1238600	0.808
PF3D7_0308300	PF3D7_0913800	0.886
PF3D7_0209800	PF3D7_1453700	0.81
PF3D7_0722200	PF3D7_1307500	0.733
PF3D7_0524800	PF3D7_0619400	0.97
PF3D7_1035700	PF3D7_1308000	0.769
PF3D7_1014100	PF3D7_1351700	0.934
PF3D7_1123400	PF3D7_1431700	0.937
PF3D7_1246200	PF3D7_1406800	0.763
PF3D7_1226700	PF3D7_1326400	0.71
PF3D7_0604100	PF3D7_1436600	0.864
PF3D7_0923000	PF3D7_1201500	0.939
PF3D7_0802600	PF3D7_1459900	0.808
PF3D7_0822200	PF3D7_1012600	0.703
PF3D7_1308200	PF3D7_1433500	0.825
PF3D7_1123400	PF3D7_1414300	0.977
PF3D7_0911100	PF3D7_1028700	0.917
PF3D7_0507400	PF3D7_1252400	0.775
PF3D7_0720400	PF3D7_1012600	0.739
PF3D7_0517400	PF3D7_0817900	0.915
PF3D7_0828800	PF3D7_1204900	0.913
PF3D7_0728000	PF3D7_1250600	0.999
PF3D7_1407100	PF3D7_1468700	0.72
PF3D7_1331300	PF3D7_1342000	0.9
PF3D7_0934800	PF3D7_1012200	0.895
PF3D7_0716100	PF3D7_0722600	0.9
PF3D7_0105400.2	PF3D7_1125800	0.725
PF3D7_0402000	PF3D7_1134000	0.795
PF3D7_1225100	PF3D7_1453500	0.786
PF3D7_1123900	PF3D7_1217200	0.711
PF3D7_1012600	PF3D7_1429500	0.729
PF3D7_0409200	PF3D7_1332700	0.919
PF3D7_0501500	PF3D7_1308000	0.85
PF3D7_0421300	PF3D7_0600200	0.787
PF3D7_1242700	PF3D7_1315700	0.887
PF3D7_0708800	PF3D7_0826700	0.725
PF3D7_0302500	PF3D7_0404700	0.895
PF3D7_0408000	PF3D7_1423300	0.752
PF3D7_1022600	PF3D7_1419100	0.714
PF3D7_0517700	PF3D7_1408600	0.975
PF3D7_0517900	PF3D7_0802800	0.736
PF3D7_1134700	PF3D7_1332700	0.967
PF3D7_0517000	PF3D7_1003500	0.998
PF3D7_1133700	PF3D7_1427100	0.711
PF3D7_0218400	PF3D7_0931100	0.864
PF3D7_0209600	PF3D7_0802600	0.793
PF3D7_0406100	PF3D7_1456800	0.9
PF3D7_0209200	PF3D7_0921800	0.711
PF3D7_0917600	PF3D7_0934100	0.705
PF3D7_0516900	PF3D7_1103100	0.999
PF3D7_0916500	PF3D7_1365400	0.772
PF3D7_1014100	PF3D7_1318700	0.908
PF3D7_0215700	PF3D7_1441200	0.905
PF3D7_0731300	PF3D7_1001900	0.71
PF3D7_1027800	PF3D7_1123900	0.775
PF3D7_0706400	PF3D7_1103100	0.995
PF3D7_0317200	PF3D7_0723800	0.798
PF3D7_1019400	PF3D7_1126200	0.999
PF3D7_1341500	PF3D7_1345600	0.863
PF3D7_0302500	PF3D7_0817600	0.834
PF3D7_1030100	PF3D7_1134000	0.774
PF3D7_0722200	PF3D7_1035900	0.891
PF3D7_0501600	PF3D7_1356300	0.759
PF3D7_0503600	PF3D7_1472600	0.774
PF3D7_0703900	PF3D7_1308200	0.703
PF3D7_1033700	PF3D7_1118600	0.882
PF3D7_0528300	PF3D7_1031400.2	0.83
PF3D7_0919300	PF3D7_1133400	0.839
PF3D7_0217500	PF3D7_0525300	0.848
PF3D7_0415500	PF3D7_1351400	0.918
PF3D7_0707300	PF3D7_1036000	0.775
PF3D7_0308600	PF3D7_0822300	0.975
PF3D7_0935000	PF3D7_1126900	0.931
PF3D7_0919400	PF3D7_1433500	0.777
PF3D7_0415500	PF3D7_1005500	0.976
PF3D7_1010600	PF3D7_1206700	0.999
PF3D7_1317800	PF3D7_1460300	0.999
PF3D7_0317600	PF3D7_0415500	0.909
PF3D7_1316000	PF3D7_1430100	0.702
PF3D7_0702400	PF3D7_0936800	0.894
PF3D7_1220100	PF3D7_1234800	0.804
PF3D7_0714000	PF3D7_1333700	0.992
PF3D7_0602400	PF3D7_1433500	0.805
PF3D7_0203700	PF3D7_1206600	0.727
PF3D7_0108000	PF3D7_1470900	0.999
PF3D7_0618300	PF3D7_0813900	0.999
PF3D7_0402300	PF3D7_0810300	0.701
PF3D7_0424200	PF3D7_1337800	0.856
PF3D7_0415500	PF3D7_1004400	0.996
PF3D7_0218500	PF3D7_1443300	0.956
PF3D7_1125700	PF3D7_1125800	0.906
PF3D7_0905400	PF3D7_1364100	0.835
PF3D7_0515700	PF3D7_1356300	0.857
PF3D7_0818900	PF3D7_1130200	0.713
PF3D7_1023200	PF3D7_1469300	0.752
PF3D7_0934600	PF3D7_1125800	0.793
PF3D7_0501200	PF3D7_1357900	0.706
PF3D7_0419700	PF3D7_1028700	0.803
PF3D7_1028300	PF3D7_1338200	0.791
PF3D7_0109000	PF3D7_0503600	0.945
PF3D7_1331800	PF3D7_1358800	0.999
PF3D7_0307100	PF3D7_1433600	0.908
PF3D7_0721300	PF3D7_1202000	0.908
PF3D7_0719600	PF3D7_1143400	0.8
PF3D7_0517700	PF3D7_1108400	0.777
PF3D7_1225500	PF3D7_1461200	0.985
PF3D7_1031400.2	PF3D7_1243700	0.821
PF3D7_0611700	PF3D7_0813900	0.999
PF3D7_0311300	PF3D7_0419900	0.841
PF3D7_0306900	PF3D7_1204300	0.922
PF3D7_1427800	PF3D7_1465300	0.76
PF3D7_0716800	PF3D7_1368200	0.961
PF3D7_0424700	PF3D7_1028000	0.711
PF3D7_1304900	PF3D7_1325000	0.832
PF3D7_0302200	PF3D7_0618000	0.87
PF3D7_0532100	PF3D7_1473200	0.736
PF3D7_0606000	PF3D7_1221900	0.709
PF3D7_0512700	PF3D7_1215300	0.707
PF3D7_0913000	PF3D7_1407500	0.808
PF3D7_1107700	PF3D7_1227800	0.719
PF3D7_0626800	PF3D7_1130200	0.722
PF3D7_0614500	PF3D7_1342000	0.999
PF3D7_0306800	PF3D7_1103100	0.82
PF3D7_0727300	PF3D7_0922200	0.924
PF3D7_0932000	PF3D7_1126700	0.871
PF3D7_0903900	PF3D7_0921900	0.705
PF3D7_0422400	PF3D7_1424100	0.999
PF3D7_0515700	PF3D7_1035900	0.797
PF3D7_0105400.2	PF3D7_0404700	0.917
PF3D7_0402300	PF3D7_0423800	0.919
PF3D7_1218600	PF3D7_1433500	0.821
PF3D7_0619900	PF3D7_1110200	0.993
PF3D7_0305600	PF3D7_0927600	0.709
PF3D7_0818700	PF3D7_1239500	0.95
PF3D7_1311900	PF3D7_1460700	0.748
PF3D7_0317000	PF3D7_1365900	0.932
PF3D7_1311900	PF3D7_1439900	0.706
PF3D7_0921800	PF3D7_1463400	0.733
PF3D7_0108000	PF3D7_0321500	0.776
PF3D7_0717500	PF3D7_1125700	0.782
PF3D7_0812600	PF3D7_1211800	0.902
PF3D7_0911100	PF3D7_1037500	0.795
PF3D7_0419800	PF3D7_1323400	0.835
PF3D7_0210600	PF3D7_0731500	0.89
PF3D7_0821700	PF3D7_1465900	0.993
PF3D7_1023000	PF3D7_1218000	0.72
PF3D7_0206200	PF3D7_0501500	0.719
PF3D7_0313500	PF3D7_1227900	0.722
PF3D7_0409100	PF3D7_1451100	0.85
PF3D7_0818100	PF3D7_1125800	0.976
PF3D7_0102200	PF3D7_0102700	0.728
PF3D7_0603300	PF3D7_1367500	0.896
PF3D7_0814000	PF3D7_1465900	0.999
PF3D7_0106700	PF3D7_0818800	0.917
PF3D7_0933600	PF3D7_1404100	0.931
PF3D7_0102500	PF3D7_1423300	0.839
PF3D7_0403700	PF3D7_0728900	0.963
PF3D7_0520000	PF3D7_1033400	0.75
PF3D7_0712300	PF3D7_1100100	0.709
PF3D7_0528400	PF3D7_0604100	0.858
PF3D7_0110800	PF3D7_1202900	0.947
PF3D7_0419800	PF3D7_0422400	0.887
PF3D7_0721600	PF3D7_0822000	0.992
PF3D7_0810300	PF3D7_1316000	0.718
PF3D7_0932300	PF3D7_1446200	0.869
PF3D7_0209600	PF3D7_0618000	0.739
PF3D7_0206700	PF3D7_0920800	0.921
PF3D7_0207800	PF3D7_0621100	0.713
PF3D7_1110600	PF3D7_1307600	0.782
PF3D7_0815600	PF3D7_1317800	0.968
PF3D7_1104200	PF3D7_1206600	0.957
PF3D7_0210700	PF3D7_1037500	0.942
PF3D7_0926100	PF3D7_1135100	0.774
PF3D7_1113200	PF3D7_1341900	0.707
PF3D7_1017100	PF3D7_1327400	0.76
PF3D7_0404000	PF3D7_0817700	0.745
PF3D7_0612900	PF3D7_0721300	0.872
PF3D7_0618000	PF3D7_1409400	0.87
PF3D7_0802800	PF3D7_1455100	0.752
PF3D7_0818900	PF3D7_1033100	0.814
PF3D7_1145200	PF3D7_1309200	0.792
PF3D7_0303200	PF3D7_1128900	0.747
PF3D7_0710900	PF3D7_1130200	0.985
PF3D7_0212300	PF3D7_0516900	0.937
PF3D7_0205500	PF3D7_0721300	0.93
PF3D7_0404900	PF3D7_1472600	0.75
PF3D7_1109400	PF3D7_1310800	0.774
PF3D7_1132700	PF3D7_1365900	0.998
PF3D7_0930300	PF3D7_1012200	0.891
PF3D7_0405900	PF3D7_1461400	0.901
PF3D7_0302200	PF3D7_0802800	0.777
PF3D7_1134000	PF3D7_1357900	0.798
PF3D7_1130200	PF3D7_1302800	0.991
PF3D7_0828000	PF3D7_0931800	0.721
PF3D7_0214000	PF3D7_1211800	0.835
PF3D7_0707500	PF3D7_1001100.2	0.768
PF3D7_1125700	PF3D7_1327300	0.815
PF3D7_1366500	PF3D7_1405600	0.996
PF3D7_1220100	PF3D7_1461600	0.788
PF3D7_0306800	PF3D7_1323100	0.794
PF3D7_0808200	PF3D7_1316200	0.922
PF3D7_1109400	PF3D7_1421200	0.962
PF3D7_0822900	PF3D7_0934600	0.788
PF3D7_0616800	PF3D7_0802000	0.853
PF3D7_0512200	PF3D7_1436000	0.701
PF3D7_0917600	PF3D7_0918600	0.793
PF3D7_1201200	PF3D7_1401400	0.707
PF3D7_0813900	PF3D7_1365900	0.995
PF3D7_0921200	PF3D7_1319300	0.767
PF3D7_1124700	PF3D7_1125400	0.996
PF3D7_1233900	PF3D7_1433500	0.834
PF3D7_1116100	PF3D7_1467900	0.721
PF3D7_0507200	PF3D7_0919900	0.884
PF3D7_1124600	PF3D7_1212500	0.708
PF3D7_0509400	PF3D7_1405600	0.725
PF3D7_0805300	PF3D7_1036500	0.726
PF3D7_0301300	PF3D7_1200700	0.728
PF3D7_1201200	PF3D7_1478800	0.78
PF3D7_0912800	PF3D7_1020700	0.749
PF3D7_1130400	PF3D7_1418000	0.797
PF3D7_0221700	PF3D7_0935700	0.903
PF3D7_0402300	PF3D7_0420300	0.76
PF3D7_0311300	PF3D7_0416500	0.745
PF3D7_0714500	PF3D7_1406200	0.897
PF3D7_1423300	PF3D7_1430200	0.797
PF3D7_0607000	PF3D7_0611700	0.915
PF3D7_0206700	PF3D7_1345700	0.826
PF3D7_1329000	PF3D7_1330600	0.75
PF3D7_1143100	PF3D7_1246400	0.753
PF3D7_0721300	PF3D7_0921200	0.766
PF3D7_0814000	PF3D7_1433600	0.9
PF3D7_1439500	PF3D7_1452000	0.791
PF3D7_0416500	PF3D7_0704500	0.899
PF3D7_1410400	PF3D7_1430200	0.806
PF3D7_1033400	PF3D7_1436000	0.884
PF3D7_0512200	PF3D7_1212000	0.969
PF3D7_0308900	PF3D7_1454000	0.852
PF3D7_0623800	PF3D7_0625400	0.869
PF3D7_0826700	PF3D7_1003500	0.999
PF3D7_0928900	PF3D7_1327600	0.701
PF3D7_0206600	PF3D7_1421400	0.985
PF3D7_0316800	PF3D7_1338200	0.999
PF3D7_0608500	PF3D7_1030500	0.996
PF3D7_1119200	PF3D7_1447200	0.805
PF3D7_0217800	PF3D7_0814000	0.999
PF3D7_0217100	PF3D7_1008900	0.808
PF3D7_0522800	PF3D7_1423200	0.83
PF3D7_1013100	PF3D7_1251500	0.924
PF3D7_1408600	PF3D7_1426000	0.999
PF3D7_1035300	PF3D7_1437300	0.789
PF3D7_1014100	PF3D7_1307500	0.922
PF3D7_0530700	PF3D7_1465300	0.708
PF3D7_0308700	PF3D7_1035900	0.725
PF3D7_0630900	PF3D7_1109400	0.956
PF3D7_0214400	PF3D7_1317900	0.79
PF3D7_0218400	PF3D7_0410700	0.739
PF3D7_0318200	PF3D7_1027400	0.999
PF3D7_0214200	PF3D7_1351400	0.98
PF3D7_0501600	PF3D7_0932200	0.901
PF3D7_0305000	PF3D7_1348300	0.788
PF3D7_0217800	PF3D7_0307200	0.92
PF3D7_1010200	PF3D7_1332400	0.738
PF3D7_0725400	PF3D7_1026600	0.809
PF3D7_1005500	PF3D7_1123400	0.997
PF3D7_1105400	PF3D7_1331800	0.999
PF3D7_0407800	PF3D7_1037500	0.771
PF3D7_1022700	PF3D7_1116100	0.716
PF3D7_0822300	PF3D7_1125500	0.999
PF3D7_1026800	PF3D7_1346300	0.797
PF3D7_1008400	PF3D7_1224300	0.916
PF3D7_1033100	PF3D7_1350700	0.702
PF3D7_0220800	PF3D7_1318000	0.705
PF3D7_1013100	PF3D7_1225500	0.971
PF3D7_0507400	PF3D7_1351700	0.963
PF3D7_1130100	PF3D7_1341200	0.999
PF3D7_1235600	PF3D7_1365500	0.994
PF3D7_0823300	PF3D7_1138800	0.97
PF3D7_0708800	PF3D7_1149600	0.763
PF3D7_1226700	PF3D7_1358800	0.953
PF3D7_0818100	PF3D7_1243400	0.74
PF3D7_0407800	PF3D7_1012200	0.901
PF3D7_1338300	PF3D7_1424100	0.959
PF3D7_1224400	PF3D7_1471000	0.958
PF3D7_1012600	PF3D7_1412600	0.801
PF3D7_1338300	PF3D7_1472600	0.793
PF3D7_0215700	PF3D7_1459000	0.951
PF3D7_0902300	PF3D7_1436300	0.78
PF3D7_0220800	PF3D7_0918000	0.761
PF3D7_0520000	PF3D7_1224300	0.928
PF3D7_1354600	PF3D7_1412600	0.709
PF3D7_0722200	PF3D7_1243700	0.77
PF3D7_1023900	PF3D7_1441400	0.902
PF3D7_0501500	PF3D7_1252100	0.92
PF3D7_1230900	PF3D7_1354300	0.848
PF3D7_0819100	PF3D7_1206600	0.711
PF3D7_0507700	PF3D7_0619400	0.998
PF3D7_1308300	PF3D7_1331800	0.999
PF3D7_0415900	PF3D7_0710600	0.999
PF3D7_0830500	PF3D7_0918700	0.903
PF3D7_0410700	PF3D7_0522600	0.838
PF3D7_0419800	PF3D7_1323100	0.815
PF3D7_0307100	PF3D7_0618300	0.999
PF3D7_0205900	PF3D7_0807800	0.999
PF3D7_1143300	PF3D7_1302700	0.959
PF3D7_0801800	PF3D7_1420900	0.826
PF3D7_0507100	PF3D7_1110600	0.973
PF3D7_0916700	PF3D7_1470900	0.9
PF3D7_0412900	PF3D7_1000100	0.788
PF3D7_0103800	PF3D7_0422300	0.87
PF3D7_1001500	PF3D7_1123900	0.728
PF3D7_0313100	PF3D7_1412700	0.784
PF3D7_0808700	PF3D7_1240300	0.836
PF3D7_0308300	PF3D7_1108100	0.761
PF3D7_0512600	PF3D7_1242800	0.912
PF3D7_0316800	PF3D7_0415900	0.999
PF3D7_1439900	PF3D7_1453800	0.887
PF3D7_0206600	PF3D7_1304900	0.736
PF3D7_0906910	PF3D7_1201500	0.734
PF3D7_1027400	PF3D7_1134700	0.71
PF3D7_1110600	PF3D7_1302800	0.765
PF3D7_0528800	PF3D7_1115300	0.702
PF3D7_0719600	PF3D7_1308300	0.995
PF3D7_1343100	PF3D7_1414400	0.734
PF3D7_0730800.2	PF3D7_1465400	0.763
PF3D7_0903900	PF3D7_1224300	0.911
PF3D7_0312400	PF3D7_1249300	0.766
PF3D7_0822000	PF3D7_1003800	0.956
PF3D7_0318700	PF3D7_1125800	0.976
PF3D7_1408600	PF3D7_1451100	0.997
PF3D7_0505000	PF3D7_0703900	0.803
PF3D7_0206000	PF3D7_1314900	0.781
PF3D7_1357800	PF3D7_1417500	0.855
PF3D7_1003600	PF3D7_1243700	0.895
PF3D7_1216000	PF3D7_1251700	0.714
PF3D7_0321800	PF3D7_1437000	0.71
PF3D7_0419800	PF3D7_1019400	0.908
PF3D7_0522300	PF3D7_1129400	0.82
PF3D7_0423500	PF3D7_0817700	0.879
PF3D7_0215700	PF3D7_1364800	0.999
PF3D7_0413700	PF3D7_1115000	0.723
PF3D7_1322100	PF3D7_1472200	0.826
PF3D7_0928900	PF3D7_1012400	0.975
PF3D7_0317200	PF3D7_0704300	0.855
PF3D7_0312800	PF3D7_0618300	0.999
PF3D7_0912400	PF3D7_0918000	0.817
PF3D7_0501500	PF3D7_1126700	0.882
PF3D7_0507700	PF3D7_1412700	0.98
PF3D7_1005100	PF3D7_1352200	0.91
PF3D7_1143300	PF3D7_1459000	0.951
PF3D7_0802600	PF3D7_1125700	0.821
PF3D7_1224400	PF3D7_1456300	0.712
PF3D7_0811500	PF3D7_1237600	0.771
PF3D7_1105400	PF3D7_1451100	0.993
PF3D7_0705400	PF3D7_1203000	0.999
PF3D7_1143400	PF3D7_1304900	0.763
PF3D7_0906600	PF3D7_0923000	0.707
PF3D7_1338300	PF3D7_1447000	0.962
PF3D7_0316000	PF3D7_0525300	0.927
PF3D7_1358800	PF3D7_1469300	0.858
PF3D7_1343100	PF3D7_1439400	0.713
PF3D7_0821500	PF3D7_1020700	0.935
PF3D7_1216300	PF3D7_1302800	0.919
PF3D7_0525800	PF3D7_1246200	0.743
PF3D7_0505800	PF3D7_1211800	0.956
PF3D7_0528300	PF3D7_0813100	0.754
PF3D7_1345600	PF3D7_1412000	0.796
PF3D7_0211200	PF3D7_0818500	0.768
PF3D7_0402300	PF3D7_1243700	0.888
PF3D7_0217500	PF3D7_1222700	0.994
PF3D7_0612900	PF3D7_0811500	0.899
PF3D7_1317800	PF3D7_1331300	0.9
PF3D7_1130100	PF3D7_1132700	0.832
PF3D7_0517700	PF3D7_1451100	0.849
PF3D7_0919200	PF3D7_1327300	0.787
PF3D7_1012600	PF3D7_1237600	0.849
PF3D7_0919300	PF3D7_1337800	0.826
PF3D7_1406800	PF3D7_1437300	0.844
PF3D7_1117400	PF3D7_1252100	0.785
PF3D7_1431700	PF3D7_1461300	0.998
PF3D7_1327400	PF3D7_1410400	0.716
PF3D7_0902500	PF3D7_1352900	0.847
PF3D7_0925700	PF3D7_1227800	0.771
PF3D7_0516200	PF3D7_1329000	0.748
PF3D7_0504400	PF3D7_1361900	0.825
PF3D7_0905500	PF3D7_1452000	0.782
PF3D7_0508700	PF3D7_1439100	0.779
PF3D7_1004400	PF3D7_1468800	0.885
PF3D7_1123900	PF3D7_1404500	0.826
PF3D7_1001400	PF3D7_1001500	0.761
PF3D7_0931800	PF3D7_1233900	0.724
PF3D7_0307700	PF3D7_1228800	0.707
PF3D7_1028400	PF3D7_1237600	0.972
PF3D7_0520600	PF3D7_1329000	0.928
PF3D7_1206200	PF3D7_1212700	0.999
PF3D7_0419800	PF3D7_1130100	0.805
PF3D7_0102500	PF3D7_0212600	0.793
PF3D7_0935500	PF3D7_0935700	0.87
PF3D7_0102200	PF3D7_1240100	0.772
PF3D7_1019400	PF3D7_1351400	0.999
PF3D7_0307200	PF3D7_0602400	0.924
PF3D7_1022400	PF3D7_1030100	0.802
PF3D7_1246400	PF3D7_1332200	0.747
PF3D7_0501600	PF3D7_1140400	0.903
PF3D7_0202000	PF3D7_1016300	0.745
PF3D7_1111000	PF3D7_1118500	0.708
PF3D7_1308200	PF3D7_1410200	0.957
PF3D7_1230500	PF3D7_1413800	0.728
PF3D7_0422300	PF3D7_0718500	0.719
PF3D7_1134700	PF3D7_1331800	0.883
PF3D7_1342600	PF3D7_1469200	0.748
PF3D7_1118200	PF3D7_1134000	0.981
PF3D7_1015800	PF3D7_1235600	0.814
PF3D7_1357100	PF3D7_1424400	0.944
PF3D7_0307100	PF3D7_1323100	0.998
PF3D7_0501300	PF3D7_1230900	0.825
PF3D7_0219200	PF3D7_1302800	0.999
PF3D7_0719600	PF3D7_1132700	0.999
PF3D7_1222300	PF3D7_1443900	0.835
PF3D7_0721600	PF3D7_1302800	0.999
PF3D7_1118200	PF3D7_1224000	0.813
PF3D7_0921800	PF3D7_1332800	0.983
PF3D7_1033700	PF3D7_1306400	0.951
PF3D7_0302100	PF3D7_1119800	0.921
PF3D7_0422700	PF3D7_1309100	0.933
PF3D7_0419700	PF3D7_1116100	0.898
PF3D7_1351700	PF3D7_1472600	0.838
PF3D7_1020700	PF3D7_1227800	0.837
PF3D7_0203700	PF3D7_0721300	0.868
PF3D7_1016700	PF3D7_1404800	0.822
PF3D7_0317600	PF3D7_1019400	0.999
PF3D7_0312800	PF3D7_1331800	0.999
PF3D7_0412900	PF3D7_1240400	0.882
PF3D7_0932000	PF3D7_1342600	0.814
PF3D7_0302200	PF3D7_1423300	0.872
PF3D7_1245400	PF3D7_1317800	0.997
PF3D7_0830500	PF3D7_1001800	0.76
PF3D7_0821700	PF3D7_1317800	0.973
PF3D7_1323400	PF3D7_1338200	0.999
PF3D7_1126000	PF3D7_1366600	0.83
PF3D7_1323100	PF3D7_1330600	0.774
PF3D7_0419800	PF3D7_1461200	0.971
PF3D7_0215700	PF3D7_0517400	0.755
PF3D7_0110400	PF3D7_0721300	0.924
PF3D7_1414300	PF3D7_1431000	0.963
PF3D7_1021500	PF3D7_1461200	0.982
PF3D7_0423500	PF3D7_0707300	0.794
PF3D7_0214200	PF3D7_0316800	0.961
PF3D7_0312400	PF3D7_1145200	0.756
PF3D7_1015600	PF3D7_1436800	0.765
PF3D7_1007900	PF3D7_1410600	0.948
PF3D7_1018600	PF3D7_1234800	0.813
PF3D7_0312800	PF3D7_0706400	0.999
PF3D7_1349200	PF3D7_1350100	0.986
PF3D7_1013800	PF3D7_1361800	0.824
PF3D7_0208200	PF3D7_1225500	0.968
PF3D7_0803400	PF3D7_1439400	0.707
PF3D7_0731500	PF3D7_1143100	0.87
PF3D7_1323400	PF3D7_1406000	0.934
PF3D7_1232100	PF3D7_1244000	0.704
PF3D7_1022500	PF3D7_1433500	0.789
PF3D7_1005500	PF3D7_1358800	0.922
PF3D7_1224100	PF3D7_1323700	0.888
PF3D7_0506900	PF3D7_1116100	0.907
PF3D7_0813100	PF3D7_1117400	0.767
PF3D7_0100300	PF3D7_1200600	0.726
PF3D7_1123900	PF3D7_1351400	0.877
PF3D7_0308200	PF3D7_0409400	0.707
PF3D7_0206600	PF3D7_1332700	0.925
PF3D7_0419600	PF3D7_1237000	0.844
PF3D7_0506900	PF3D7_0817600	0.894
PF3D7_0503800	PF3D7_0710900	0.897
PF3D7_0415900	PF3D7_1016400	0.799
PF3D7_0818100	PF3D7_1136200	0.761
PF3D7_0319600	PF3D7_1358800	0.722
PF3D7_0501600	PF3D7_0528400	0.92
PF3D7_1251500	PF3D7_1310800	0.753
PF3D7_0507100	PF3D7_1211800	0.891
PF3D7_0920800	PF3D7_0922600	0.84
PF3D7_0419800	PF3D7_0827100	0.757
PF3D7_0919600	PF3D7_1414300	0.905
PF3D7_0918300	PF3D7_1033400	0.758
PF3D7_1118200	PF3D7_1330300	0.919
PF3D7_0826700	PF3D7_1434300	0.794
PF3D7_0309000	PF3D7_1318800	0.715
PF3D7_1318800	PF3D7_1346100	0.931
PF3D7_0508000	PF3D7_0934800	0.778
PF3D7_0811500	PF3D7_1367600	0.738
PF3D7_0315100	PF3D7_0415500	0.955
PF3D7_0706400	PF3D7_1408600	0.976
PF3D7_0731100	PF3D7_1116800	0.831
PF3D7_0217100	PF3D7_0815400	0.772
PF3D7_0501500	PF3D7_0802600	0.886
PF3D7_0110800	PF3D7_0818700	0.965
PF3D7_0200700	PF3D7_0412400	0.743
PF3D7_0819100	PF3D7_1355300	0.731
PF3D7_0813900	PF3D7_1357100	0.937
PF3D7_1130100	PF3D7_1447000	0.997
PF3D7_0322900	PF3D7_1465900	0.999
PF3D7_0525800	PF3D7_1035900	0.889
PF3D7_0218400	PF3D7_1226700	0.784
PF3D7_0911100	PF3D7_0920700	0.783
PF3D7_0414900	PF3D7_1252100	0.745
PF3D7_0307100	PF3D7_1441200	0.985
PF3D7_0308200	PF3D7_1134700	0.701
PF3D7_0923000	PF3D7_1351400	0.951
PF3D7_0712400	PF3D7_0808600	0.78
PF3D7_0312800	PF3D7_0422700	0.932
PF3D7_0528300	PF3D7_1143100	0.765
PF3D7_0614500	PF3D7_1137100	0.846
PF3D7_0730200	PF3D7_1231100	0.72
PF3D7_0726500	PF3D7_1117100	0.979
PF3D7_0405900	PF3D7_1035100	0.882
PF3D7_0727200	PF3D7_1405800	0.768
PF3D7_0206000	PF3D7_0812600	0.736
PF3D7_0828800	PF3D7_1455300	0.92
PF3D7_0707900	PF3D7_1103100	0.754
PF3D7_0322000	PF3D7_1012400	0.778
PF3D7_0306900	PF3D7_1130100	0.999
PF3D7_0525300	PF3D7_0822900	0.863
PF3D7_0630500	PF3D7_0711000	0.894
PF3D7_0621300	PF3D7_0931100	0.717
PF3D7_0322300	PF3D7_0924000	0.754
PF3D7_0932100	PF3D7_1344300	0.717
PF3D7_1105700	PF3D7_1471000	0.756
PF3D7_0931800	PF3D7_1306400	0.994
PF3D7_0414900	PF3D7_0731500	0.87
PF3D7_1241800	PF3D7_1302700	0.872
PF3D7_0721300	PF3D7_1027400	0.919
PF3D7_1307600	PF3D7_1410200	0.944
PF3D7_0907500	PF3D7_1406800	0.703
PF3D7_0817700	PF3D7_1022700	0.847
PF3D7_0412400	PF3D7_0712900	0.851
PF3D7_0932200	PF3D7_0934800	0.804
PF3D7_0108300	PF3D7_1216900	0.782
PF3D7_0618300	PF3D7_1365900	0.999
PF3D7_0425800	PF3D7_1240900	0.83
PF3D7_0108600	PF3D7_0501100.2	0.749
PF3D7_0209600	PF3D7_1345600	0.777
PF3D7_1336900	PF3D7_1461900	0.717
PF3D7_0903900	PF3D7_1142600	0.999
PF3D7_1307600	PF3D7_1346100	0.918
PF3D7_0319600	PF3D7_1443300	0.861
PF3D7_0209800	PF3D7_1132200	0.857
PF3D7_0320800	PF3D7_1106300	0.92
PF3D7_0501600	PF3D7_0525300	0.725
PF3D7_1126700	PF3D7_1310700	0.936
PF3D7_0306800	PF3D7_1134700	0.735
PF3D7_0932100	PF3D7_1224100	0.783
PF3D7_1342000	PF3D7_1365900	0.999
PF3D7_0811600	PF3D7_1228600	0.742
PF3D7_0308300	PF3D7_0308700	0.877
PF3D7_0708400	PF3D7_1117800	0.769
PF3D7_0210000	PF3D7_1408600	0.922
PF3D7_0322900	PF3D7_1302800	0.999
PF3D7_0203700	PF3D7_0218400	0.893
PF3D7_0802300	PF3D7_1358100	0.877
PF3D7_0821500	PF3D7_1405500	0.738
PF3D7_0207800	PF3D7_0609800	0.755
PF3D7_1011400	PF3D7_1211800	0.99
PF3D7_0309500	PF3D7_0802000	0.819
PF3D7_0310400	PF3D7_1346900	0.841
PF3D7_0403700	PF3D7_1360100	0.939
PF3D7_1110200	PF3D7_1126900	0.933
PF3D7_1226700	PF3D7_1315700	0.825
PF3D7_0920700	PF3D7_1452000	0.777
PF3D7_0528600	PF3D7_1119200	0.76
PF3D7_0622800	PF3D7_1132200	0.741
PF3D7_0323400	PF3D7_1252400	0.98
PF3D7_0207000	PF3D7_0831600	0.846
PF3D7_1009000	PF3D7_1028400	0.78
PF3D7_0603300	PF3D7_1433500	0.783
PF3D7_0308600	PF3D7_1355800	0.747
PF3D7_0412400	PF3D7_0711700	0.749
PF3D7_1029200	PF3D7_1317900	0.84
PF3D7_1037100	PF3D7_1441400	0.768
PF3D7_1241800	PF3D7_1423000	0.806
PF3D7_0831600	PF3D7_0932000	0.74
PF3D7_0703500	PF3D7_0931000	0.886
PF3D7_0921800	PF3D7_1307000	0.716
PF3D7_0818900	PF3D7_1232100	0.928
PF3D7_0814000	PF3D7_1144000	0.999
PF3D7_1309300	PF3D7_1443300	0.845
PF3D7_1019900	PF3D7_1409400	0.815
PF3D7_1352100	PF3D7_1454500	0.782
PF3D7_0207100	PF3D7_1036000	0.794
PF3D7_0722200	PF3D7_0802800	0.918
PF3D7_0302200	PF3D7_0621100	0.839
PF3D7_0613700	PF3D7_1239900	0.814
PF3D7_1017500	PF3D7_1026600	0.894
PF3D7_0925700	PF3D7_1117700	0.928
PF3D7_0302200	PF3D7_1361800	0.891
PF3D7_0207800	PF3D7_1452000	0.897
PF3D7_0725400	PF3D7_1342600	0.896
PF3D7_0722200	PF3D7_1323700	0.914
PF3D7_0424700	PF3D7_1001500	0.713
PF3D7_1419400	PF3D7_1434500	0.705
PF3D7_0906600	PF3D7_1407900	0.875
PF3D7_0509400	PF3D7_1418900	0.916
PF3D7_0419600	PF3D7_1412300	0.985
PF3D7_0814000	PF3D7_1216300	0.922
PF3D7_0630900	PF3D7_0821300	0.85
PF3D7_1143100	PF3D7_1361800	0.844
PF3D7_0402300	PF3D7_0808200	0.92
PF3D7_0210000	PF3D7_1341300	0.948
PF3D7_0307200	PF3D7_1006200	0.752
PF3D7_1129200	PF3D7_1224300	0.9
PF3D7_0212300	PF3D7_0422700	0.93
PF3D7_0320700	PF3D7_1320100	0.702
PF3D7_0209600	PF3D7_0905400	0.89
PF3D7_0905400	PF3D7_1028700	0.813
PF3D7_0519400	PF3D7_1338300	0.773
PF3D7_0608500	PF3D7_1328100	0.999
PF3D7_1317200	PF3D7_1408200	0.78
PF3D7_0517700	PF3D7_1419700	0.995
PF3D7_0322000	PF3D7_1439900	0.847
PF3D7_1130100	PF3D7_1424400	0.999
PF3D7_0805200	PF3D7_1240100	0.919
PF3D7_0218400	PF3D7_0729400	0.907
PF3D7_0215700	PF3D7_1331100	0.9
PF3D7_1140400	PF3D7_1228600	0.888
PF3D7_0316800	PF3D7_1332800	0.756
PF3D7_0816000	PF3D7_1421400	0.717
PF3D7_1120000	PF3D7_1212700	0.779
PF3D7_0731200	PF3D7_1114200	0.798
PF3D7_0508700	PF3D7_0610100	0.721
PF3D7_0302500	PF3D7_0707300	0.862
PF3D7_1019400	PF3D7_1130200	0.999
PF3D7_1207100	PF3D7_1419100	0.712
PF3D7_0210600	PF3D7_1223100	0.795
PF3D7_0312800	PF3D7_0710900	0.96
PF3D7_1223100	PF3D7_1316200	0.735
PF3D7_0520300	PF3D7_1325000	0.953
PF3D7_0217300	PF3D7_0617100	0.937
PF3D7_0729400	PF3D7_1405800	0.999
PF3D7_0831600	PF3D7_1361800	0.87
PF3D7_0501600	PF3D7_0704500	0.777
PF3D7_1138800	PF3D7_1358200	0.737
PF3D7_0826500	PF3D7_1011700	0.972
PF3D7_0803400	PF3D7_0816800	0.978
PF3D7_0322300	PF3D7_1308800	0.782
PF3D7_1211800	PF3D7_1306600	0.909
PF3D7_0309600	PF3D7_0520000	0.999
PF3D7_1115800	PF3D7_1149200	0.971
PF3D7_1003500	PF3D7_1010600	0.975
PF3D7_1103100	PF3D7_1312900	0.9
PF3D7_1020700	PF3D7_1412600	0.756
PF3D7_1423500	PF3D7_1433500	0.767
PF3D7_0812400	PF3D7_1233900	0.792
PF3D7_1221900	PF3D7_1404800	0.88
PF3D7_1211700	PF3D7_1317100	0.999
PF3D7_0212300	PF3D7_1424400	0.945
PF3D7_0822300	PF3D7_1304900	0.964
PF3D7_0322000	PF3D7_1428300	0.757
PF3D7_1105400	PF3D7_1118500	0.759
PF3D7_0527400	PF3D7_0830600	0.794
PF3D7_0818900	PF3D7_1472600	0.798
PF3D7_0701900	PF3D7_1002100	0.758
PF3D7_0523400	PF3D7_0818900	0.849
PF3D7_0709100	PF3D7_1364100	0.75
PF3D7_1224400	PF3D7_1340300	0.785
PF3D7_0506900	PF3D7_0932100	0.832
PF3D7_0913800	PF3D7_1243700	0.899
PF3D7_1223100	PF3D7_1339400	0.78
PF3D7_0317800	PF3D7_1002500	0.951
PF3D7_1306900	PF3D7_1367100	0.991
PF3D7_0217500	PF3D7_0725400	0.916
PF3D7_0916700	PF3D7_1129200	0.9
PF3D7_0419700	PF3D7_1140400	0.792
PF3D7_0813900	PF3D7_1349200	0.711
PF3D7_0403800	PF3D7_1301600	0.865
PF3D7_1249900	PF3D7_1308200	0.725
PF3D7_0925400	PF3D7_1469200	0.912
PF3D7_0415900	PF3D7_1421200	0.999
PF3D7_0516900	PF3D7_1132200	0.819
PF3D7_0414900	PF3D7_1243700	0.975
PF3D7_1039100	PF3D7_1108700	0.712
PF3D7_0822000	PF3D7_1130200	0.979
PF3D7_0816600	PF3D7_1436800	0.942
PF3D7_0406200	PF3D7_1476500	0.795
PF3D7_0710600	PF3D7_1460300	0.999
PF3D7_0302000	PF3D7_1033600	0.999
PF3D7_0508000	PF3D7_1238600	0.85
PF3D7_0903700	PF3D7_1357100	0.757
PF3D7_1041200	PF3D7_1242700	0.724
PF3D7_0712000	PF3D7_1240600	0.757
PF3D7_0509400	PF3D7_0621300	0.71
PF3D7_0507200	PF3D7_1335100	0.784
PF3D7_0418100	PF3D7_0729300	0.824
PF3D7_1015800	PF3D7_1332700	0.9
PF3D7_1027800	PF3D7_1414300	0.999
PF3D7_0404000	PF3D7_1143100	0.702
PF3D7_0917900	PF3D7_1149600	0.748
PF3D7_1012200	PF3D7_1133400	0.771
PF3D7_1129400	PF3D7_1216900	0.73
PF3D7_0611700	PF3D7_0821700	0.999
PF3D7_0916700	PF3D7_1474800	0.9
PF3D7_0520000	PF3D7_1421200	0.999
PF3D7_0108000	PF3D7_0205900	0.996
PF3D7_1146600	PF3D7_1423300	0.712
PF3D7_0218500	PF3D7_1367100	0.988
PF3D7_0724700	PF3D7_0929000	0.758
PF3D7_0506100	PF3D7_0903900	0.946
PF3D7_0305600	PF3D7_0918000	0.801
PF3D7_1118500	PF3D7_1405800	0.809
PF3D7_1020700	PF3D7_1217200	0.957
PF3D7_1323100	PF3D7_1451100	0.999
PF3D7_0710600	PF3D7_0710900	0.835
PF3D7_1348300	PF3D7_1367600	0.889
PF3D7_1003600	PF3D7_1035900	0.891
PF3D7_0704500	PF3D7_1220300	0.753
PF3D7_0904400	PF3D7_1105400	0.906
PF3D7_0315100	PF3D7_0517700	0.939
PF3D7_0930300	PF3D7_1035500	0.878
PF3D7_0830500	PF3D7_0902300	0.766
PF3D7_1109900	PF3D7_1424100	0.999
PF3D7_0826700	PF3D7_1347200	0.931
PF3D7_0307200	PF3D7_1354300	0.841
PF3D7_1437200	PF3D7_1459000	0.904
PF3D7_0808300	PF3D7_0826500	0.982
PF3D7_0403800	PF3D7_0620400	0.743
PF3D7_0405900	PF3D7_0913800	0.707
PF3D7_0604100	PF3D7_1116100	0.87
PF3D7_0316000	PF3D7_1232500	0.706
PF3D7_0518500	PF3D7_1439100	0.807
PF3D7_1308200	PF3D7_1445900	0.76
PF3D7_0729400	PF3D7_1364800	0.958
PF3D7_0203700	PF3D7_1109400	0.921
PF3D7_0918300	PF3D7_1465900	0.957
PF3D7_1012600	PF3D7_1447000	0.899
PF3D7_0402300	PF3D7_1116100	0.796
PF3D7_1035300	PF3D7_1472600	0.926
PF3D7_1137100	PF3D7_1302800	0.873
PF3D7_1405800	PF3D7_1471000	0.79
PF3D7_0318200	PF3D7_1459000	0.949
PF3D7_1006700	PF3D7_1317900	0.751
PF3D7_1124800	PF3D7_1129400	0.986
PF3D7_0812400	PF3D7_0815200	0.998
PF3D7_0103200	PF3D7_1416900	0.753
PF3D7_0322900	PF3D7_0516200	0.999
PF3D7_1310700	PF3D7_1344300	0.809
PF3D7_0621100	PF3D7_1022700	0.734
PF3D7_0503800	PF3D7_1406000	0.934
PF3D7_1008900	PF3D7_1464700	0.714
PF3D7_0201800	PF3D7_1118200	0.901
PF3D7_1008400	PF3D7_1033700	0.938
PF3D7_1008800	PF3D7_1230600	0.978
PF3D7_0419700	PF3D7_0528400	0.776
PF3D7_0516200	PF3D7_1003800	0.968
PF3D7_0518500	PF3D7_1123900	0.913
PF3D7_1036500	PF3D7_1246400	0.705
PF3D7_0803000	PF3D7_1423200	0.814
PF3D7_0615900	PF3D7_0811300	0.949
PF3D7_0424100	PF3D7_1009700	0.745
PF3D7_1109900	PF3D7_1441200	0.999
PF3D7_0109000	PF3D7_1125700	0.901
PF3D7_0629200	PF3D7_1406600	0.715
PF3D7_0627800	PF3D7_1211800	0.77
PF3D7_0827000	PF3D7_1307300	0.781
PF3D7_1332200	PF3D7_1472600	0.719
PF3D7_0520600	PF3D7_1143300	0.956
PF3D7_0503400	PF3D7_0515700	0.702
PF3D7_0519200	PF3D7_1129200	0.738
PF3D7_0419600	PF3D7_1442900	0.739
PF3D7_0317600	PF3D7_1026800	0.999
PF3D7_1118200	PF3D7_1213800	0.822
PF3D7_0214200	PF3D7_0506100	0.803
PF3D7_0612100	PF3D7_1419700	0.994
PF3D7_1130200	PF3D7_1441200	0.999
PF3D7_0602100	PF3D7_0607000	0.739
PF3D7_0302200	PF3D7_0423500	0.901
PF3D7_1108400	PF3D7_1328800	0.84
PF3D7_1331300	PF3D7_1338200	0.904
PF3D7_0916000	PF3D7_1345600	0.852
PF3D7_1230600	PF3D7_1417500	0.716
PF3D7_0612900	PF3D7_1129400	0.993
PF3D7_0622800	PF3D7_1213800	0.988
PF3D7_1319100	PF3D7_1478100	0.902
PF3D7_0825500	PF3D7_1028300	0.993
PF3D7_0105400.2	PF3D7_0722200	0.866
PF3D7_0826700	PF3D7_1011700	0.737
PF3D7_1332700	PF3D7_1431300	0.799
PF3D7_0415900	PF3D7_0618300	0.999
PF3D7_0424100	PF3D7_1455300	0.9
PF3D7_1230700	PF3D7_1316200	0.71
PF3D7_0826100	PF3D7_0922100	0.709
PF3D7_0705700	PF3D7_1317800	0.999
PF3D7_0217500	PF3D7_1409400	0.885
PF3D7_0203200	PF3D7_1028900	0.711
PF3D7_0823300	PF3D7_1033700	0.707
PF3D7_0320300	PF3D7_1468700	0.845
PF3D7_0409200	PF3D7_1129400	0.832
PF3D7_0525800	PF3D7_1125800	0.927
PF3D7_1430800	PF3D7_1431100	0.802
PF3D7_0911100	PF3D7_1410400	0.775
PF3D7_1302800	PF3D7_1460700	0.999
PF3D7_0524800	PF3D7_1356300	0.76
PF3D7_0318200	PF3D7_1465900	0.876
PF3D7_0934800	PF3D7_1228600	0.894
PF3D7_0527200	PF3D7_1117100	0.83
PF3D7_1408600	PF3D7_1433600	0.9
PF3D7_0830600	PF3D7_1115800	0.776
PF3D7_0716800	PF3D7_1007900	0.999
PF3D7_1005100	PF3D7_1404500	0.808
PF3D7_0421300	PF3D7_1240900	0.891
PF3D7_1239200	PF3D7_1359600	0.736
PF3D7_1001500	PF3D7_1411900	0.726
PF3D7_0525300	PF3D7_1204900	0.917
PF3D7_1008800	PF3D7_1207100	0.944
PF3D7_0929400	PF3D7_1361800	0.895
PF3D7_0722200	PF3D7_1136200	0.896
PF3D7_0306900	PF3D7_1216300	0.921
PF3D7_0704500	PF3D7_1012200	0.773
PF3D7_1012200	PF3D7_1143100	0.802
PF3D7_0532600	PF3D7_1016300	0.723
PF3D7_0214000	PF3D7_0717700	0.771
PF3D7_1134700	PF3D7_1415200	0.999
PF3D7_0822000	PF3D7_1460300	0.83
PF3D7_0716100	PF3D7_1353100	0.734
PF3D7_1311300	PF3D7_1462700	0.894
PF3D7_0930300	PF3D7_1364100	0.835
PF3D7_0506200	PF3D7_1362200	0.753
PF3D7_0525300	PF3D7_0810300	0.781
PF3D7_0827800	PF3D7_1008000	0.732
PF3D7_0720400	PF3D7_1438900	0.801
PF3D7_0508000	PF3D7_1406800	0.786
PF3D7_0532100	PF3D7_1408100	0.71
PF3D7_1216200	PF3D7_1444300	0.815
PF3D7_0402300	PF3D7_0934600	0.735
PF3D7_0523000	PF3D7_1303500	0.959
PF3D7_0911100	PF3D7_1222700	0.779
PF3D7_1318400	PF3D7_1433500	0.934
PF3D7_1020700	PF3D7_1471000	0.906
PF3D7_0706400	PF3D7_1302800	0.973
PF3D7_1133000	PF3D7_1410400	0.723
PF3D7_1367600	PF3D7_1447000	0.984
PF3D7_1203500	PF3D7_1225500	0.727
PF3D7_1012600	PF3D7_1307300	0.77
PF3D7_0402300	PF3D7_0802600	0.749
PF3D7_1026600	PF3D7_1125700	0.906
PF3D7_1145200	PF3D7_1345600	0.901
PF3D7_1128900	PF3D7_1224100	0.773
PF3D7_1123900	PF3D7_1364800	0.985
PF3D7_0710900	PF3D7_1105400	0.84
PF3D7_0721300	PF3D7_1251500	0.791
PF3D7_1331800	PF3D7_1346100	0.876
PF3D7_1130200	PF3D7_1447000	0.999
PF3D7_0506200	PF3D7_1412500	0.742
PF3D7_1035900	PF3D7_1251200	0.884
PF3D7_1003600	PF3D7_1036000	0.901
PF3D7_0204400	PF3D7_1122900	0.87
PF3D7_1028400	PF3D7_1224400	0.88
PF3D7_0206600	PF3D7_1241800	0.911
PF3D7_0719600	PF3D7_1419700	0.728
PF3D7_0629800	PF3D7_1203900	0.73
PF3D7_0902500	PF3D7_1477800	0.719
PF3D7_0608700	PF3D7_0729400	0.744
PF3D7_0913200	PF3D7_1357100	0.908
PF3D7_0520000	PF3D7_0710900	0.969
PF3D7_0317200	PF3D7_0416500	0.707
PF3D7_0113300	PF3D7_1478000	0.752
PF3D7_1353200	PF3D7_1427100	0.773
PF3D7_1412600	PF3D7_1417500	0.717
PF3D7_0306900	PF3D7_1429700	0.969
PF3D7_0913000	PF3D7_1476000	0.75
PF3D7_0322900	PF3D7_1351400	0.999
PF3D7_0523400	PF3D7_1116800	0.732
PF3D7_0704300	PF3D7_1409300	0.89
PF3D7_0932200	PF3D7_1223100	0.899
PF3D7_0816000	PF3D7_1405800	0.997
PF3D7_0410300	PF3D7_1009600	0.929
PF3D7_0803000	PF3D7_1116800	0.904
PF3D7_1357900	PF3D7_1358800	0.76
PF3D7_0702000	PF3D7_1352900	0.748
PF3D7_0903900	PF3D7_1424100	0.999
PF3D7_1031200	PF3D7_1351700	0.815
PF3D7_1206700	PF3D7_1468700	0.973
PF3D7_1407100	PF3D7_1445200	0.789
PF3D7_1243600	PF3D7_1317800	0.924
PF3D7_0618000	PF3D7_1401600	0.786
PF3D7_1201200	PF3D7_1427100	0.889
PF3D7_1017000	PF3D7_1343300	0.784
PF3D7_1108700	PF3D7_1211800	0.773
PF3D7_1017500	PF3D7_1342600	0.891
PF3D7_0818800	PF3D7_1407100	0.991
PF3D7_0424500	PF3D7_0830500	0.922
PF3D7_0604100	PF3D7_0618000	0.836
PF3D7_1037300	PF3D7_1134000	0.73
PF3D7_1145200	PF3D7_1409400	0.794
PF3D7_0908400	PF3D7_0931500	0.856
PF3D7_0731100	PF3D7_1230900	0.839
PF3D7_0402000	PF3D7_1004400	0.718
PF3D7_1251500	PF3D7_1357700	0.906
PF3D7_0522800	PF3D7_1220100	0.964
PF3D7_0716100	PF3D7_0816000	0.87
PF3D7_1308200	PF3D7_1417500	0.796
PF3D7_0924500	PF3D7_1437300	0.707
PF3D7_0610400	PF3D7_1433300	0.834
PF3D7_1026800	PF3D7_1410600	0.974
PF3D7_1333600	PF3D7_1353100	0.755
PF3D7_0312800	PF3D7_1143400	0.899
PF3D7_0522100	PF3D7_0813100	0.746
PF3D7_1433600	PF3D7_1461300	0.9
PF3D7_0916700	PF3D7_1312900	0.9
PF3D7_0705700	PF3D7_1206600	0.822
PF3D7_1126200	PF3D7_1130200	0.997
PF3D7_0209200	PF3D7_0615400	0.897
PF3D7_0311300	PF3D7_1224100	0.752
PF3D7_0503300	PF3D7_1414800	0.912
PF3D7_0604700	PF3D7_1113700	0.8
PF3D7_0909800	PF3D7_1027400	0.927
PF3D7_0915100	PF3D7_1225800	0.733
PF3D7_1338200	PF3D7_1357000	0.782
PF3D7_0710600	PF3D7_1433600	0.9
PF3D7_0415900	PF3D7_1126200	0.999
PF3D7_1033100	PF3D7_1433500	0.856
PF3D7_0311200	PF3D7_1012600	0.822
PF3D7_0916000	PF3D7_1223100	0.85
PF3D7_1408200	PF3D7_1410200	0.709
PF3D7_0506200	PF3D7_1027400	0.763
PF3D7_0205500	PF3D7_0405000	0.932
PF3D7_1014100	PF3D7_1125700	0.915
PF3D7_0304100	PF3D7_0308700	0.703
PF3D7_0822900	PF3D7_1469200	0.772
PF3D7_0810600	PF3D7_1110200	0.816
PF3D7_1212800	PF3D7_1325200	0.803
PF3D7_0714000	PF3D7_1211800	0.764
PF3D7_0215300	PF3D7_0525100	0.921
PF3D7_1036000	PF3D7_1145200	0.791
PF3D7_1001600	PF3D7_1124600	0.773
PF3D7_1146000	PF3D7_1434500	0.987
PF3D7_0213100	PF3D7_1437900	0.719
PF3D7_0722200	PF3D7_1022700	0.778
PF3D7_0711000	PF3D7_1248900	0.702
PF3D7_0206200	PF3D7_1452000	0.777
PF3D7_0704500	PF3D7_1345600	0.71
PF3D7_0424100	PF3D7_0506900	0.749
PF3D7_1125400	PF3D7_1421600	0.705
PF3D7_0307100	PF3D7_0519400	0.999
PF3D7_0217800	PF3D7_1431700	0.999
PF3D7_1225500	PF3D7_1405800	0.862
PF3D7_0505500	PF3D7_1107400	0.933
PF3D7_0619900	PF3D7_1224900	0.961
PF3D7_1364800	PF3D7_1449800	0.704
PF3D7_0212400	PF3D7_0212500	0.785
PF3D7_0320300	PF3D7_1132200	0.999
PF3D7_0909900	PF3D7_1037600	0.714
PF3D7_0508700	PF3D7_0917600	0.781
PF3D7_0522600	PF3D7_1436600	0.78
PF3D7_0710600	PF3D7_1109900	0.999
PF3D7_0213100	PF3D7_1433500	0.824
PF3D7_1021500	PF3D7_1307300	0.718
PF3D7_0215700	PF3D7_0218500	0.912
PF3D7_1019400	PF3D7_1341300	0.999
PF3D7_0525800	PF3D7_1332200	0.886
PF3D7_0925600	PF3D7_1330500	0.772
PF3D7_0302500	PF3D7_1116100	0.918
PF3D7_0422400	PF3D7_1019400	0.998
PF3D7_0217800	PF3D7_1109900	0.999
PF3D7_0716100	PF3D7_1332700	0.868
PF3D7_0414900	PF3D7_0934600	0.804
PF3D7_0507100	PF3D7_1341200	0.999
PF3D7_0618300	PF3D7_1115300	0.782
PF3D7_0316800	PF3D7_1243600	0.894
PF3D7_0925200	PF3D7_1109400	0.79
PF3D7_0305000	PF3D7_0721600	0.723
PF3D7_0501600	PF3D7_1133000	0.806
PF3D7_0708400	PF3D7_1033100	0.754
PF3D7_0903200	PF3D7_1239900	0.92
PF3D7_0206200	PF3D7_0414900	0.968
PF3D7_0501500	PF3D7_0522600	0.791
PF3D7_0716100	PF3D7_0912800	0.735
PF3D7_0815600	PF3D7_1144000	0.941
PF3D7_0307100	PF3D7_1424100	0.999
PF3D7_1136200	PF3D7_1143100	0.796
PF3D7_0927700	PF3D7_1430100	0.854
PF3D7_0416500	PF3D7_1143300	0.892
PF3D7_1123900	PF3D7_1132700	0.736
PF3D7_0923000	PF3D7_1323100	0.95
PF3D7_1123400	PF3D7_1451100	0.919
PF3D7_0407000	PF3D7_1009000	0.753
PF3D7_0919300	PF3D7_1125800	0.901
PF3D7_0109000	PF3D7_0528300	0.758
PF3D7_0419600	PF3D7_0505800	0.901
PF3D7_0525800	PF3D7_1307500	0.85
PF3D7_0707300	PF3D7_1364100	0.821
PF3D7_1201500	PF3D7_1224400	0.723
PF3D7_1015900	PF3D7_1130000	0.742
PF3D7_0617000	PF3D7_1124700	0.814
PF3D7_1125800	PF3D7_1149200	0.827
PF3D7_0817700	PF3D7_1406800	0.897
PF3D7_1035900	PF3D7_1222700	0.896
PF3D7_0501600	PF3D7_1232500	0.923
PF3D7_0517000	PF3D7_1366600	0.963
PF3D7_1427800	PF3D7_1461200	0.811
PF3D7_0807800	PF3D7_0931800	0.999
PF3D7_0312800	PF3D7_1123400	0.944
PF3D7_0602100	PF3D7_1106000	0.743
PF3D7_0509800	PF3D7_1315600	0.956
PF3D7_1028300	PF3D7_1225500	0.73
PF3D7_0520000	PF3D7_0815600	0.947
PF3D7_0424100	PF3D7_0805300	0.771
PF3D7_0905400	PF3D7_0934800	0.893
PF3D7_0731500	PF3D7_1028700	0.951
PF3D7_0109800	PF3D7_1412600	0.725
PF3D7_1138500	PF3D7_1211800	0.717
PF3D7_0220800	PF3D7_1228600	0.782
PF3D7_1242700	PF3D7_1424100	0.999
PF3D7_0517700	PF3D7_0912800	0.942
PF3D7_0924700	PF3D7_0935000	0.811
PF3D7_1110600	PF3D7_1429700	0.968
PF3D7_0918300	PF3D7_1109400	0.808
PF3D7_1116700	PF3D7_1438000	0.759
PF3D7_0506100	PF3D7_1469300	0.993
PF3D7_0217500	PF3D7_0911100	0.899
PF3D7_0708400	PF3D7_1124700	0.937
PF3D7_0102500	PF3D7_0818100	0.941
PF3D7_1108500	PF3D7_1439400	0.745
PF3D7_1037500	PF3D7_1116100	0.785
PF3D7_0508000	PF3D7_0927300	0.751
PF3D7_0219700	PF3D7_1401400	0.719
PF3D7_0621100	PF3D7_1126700	0.769
PF3D7_0923000	PF3D7_1331100	0.902
PF3D7_0730900	PF3D7_1221900	0.729
PF3D7_1123900	PF3D7_1341200	0.809
PF3D7_1246200	PF3D7_1357000	0.827
PF3D7_0203200	PF3D7_1243400	0.729
PF3D7_0106700	PF3D7_1307300	0.881
PF3D7_1426000	PF3D7_1441200	0.999
PF3D7_0307200	PF3D7_0316800	0.999
PF3D7_1027100	PF3D7_1445200	0.815
PF3D7_0405200	PF3D7_1145200	0.701
PF3D7_0722200	PF3D7_1014100	0.906
PF3D7_1226700	PF3D7_1241800	0.878
PF3D7_1103600	PF3D7_1225200	0.99
PF3D7_1447000	PF3D7_1451100	0.999
PF3D7_0316800	PF3D7_1224300	0.92
PF3D7_1001400	PF3D7_1038800	0.723
PF3D7_0810300	PF3D7_1036500	0.716
PF3D7_0626800	PF3D7_1012400	0.719
PF3D7_0323400	PF3D7_0620400	0.776
PF3D7_0105800	PF3D7_1331600	0.73
PF3D7_0501300	PF3D7_0501400	0.971
PF3D7_1012500	PF3D7_1130000	0.82
PF3D7_0719700	PF3D7_1019400	0.99
PF3D7_0309600	PF3D7_1026800	0.999
PF3D7_0404700	PF3D7_0929400	0.896
PF3D7_1005100	PF3D7_1124800	0.749
PF3D7_1133400	PF3D7_1332200	0.912
PF3D7_0207600	PF3D7_0516800	0.712
PF3D7_1353600	PF3D7_1412000	0.73
PF3D7_0618300	PF3D7_1137100	0.958
PF3D7_0415900	PF3D7_1246800	0.9
PF3D7_0405400	PF3D7_1027400	0.911
PF3D7_1037100	PF3D7_1325200	0.944
PF3D7_1124900	PF3D7_1130200	0.999
PF3D7_0501500	PF3D7_0620400	0.858
PF3D7_0708400	PF3D7_1026800	0.794
PF3D7_0219200	PF3D7_1431700	0.985
PF3D7_0404000	PF3D7_1423300	0.77
PF3D7_1005100	PF3D7_1028400	0.854
PF3D7_0507200	PF3D7_1431400	0.716
PF3D7_1414300	PF3D7_1424400	0.999
PF3D7_0202500	PF3D7_0501400	0.711
PF3D7_0424100	PF3D7_1307500	0.919
PF3D7_0217500	PF3D7_1140400	0.896
PF3D7_0302500	PF3D7_1126700	0.813
PF3D7_1036000	PF3D7_1472600	0.914
PF3D7_0501300	PF3D7_1221900	0.726
PF3D7_1146600	PF3D7_1223100	0.805
PF3D7_0404700	PF3D7_0424100	0.763
PF3D7_0106700	PF3D7_1109400	0.996
PF3D7_0822900	PF3D7_1351700	0.909
PF3D7_0528100	PF3D7_1037500	0.83
PF3D7_0217500	PF3D7_1133000	0.724
PF3D7_1117400	PF3D7_1459900	0.738
PF3D7_1362200	PF3D7_1364800	0.906
PF3D7_0721600	PF3D7_0904400	0.9
PF3D7_0907400	PF3D7_1232100	0.704
PF3D7_0219200	PF3D7_0815600	0.931
PF3D7_0820000	PF3D7_1405600	0.902
PF3D7_1239700	PF3D7_1427900	0.717
PF3D7_0626800	PF3D7_1441400	0.765
PF3D7_0707900	PF3D7_1428300	0.986
PF3D7_1028300	PF3D7_1247900	0.971
PF3D7_1009700	PF3D7_1310200	0.848
PF3D7_1428300	PF3D7_1465900	0.78
PF3D7_0821700	PF3D7_1130100	0.999
PF3D7_1335100	PF3D7_1455300	0.752
PF3D7_0217500	PF3D7_0930300	0.915
PF3D7_0312800	PF3D7_1406000	0.921
PF3D7_1365900	PF3D7_1368100	0.946
PF3D7_1001500	PF3D7_1101500	0.718
PF3D7_0217500	PF3D7_0817700	0.918
PF3D7_0610800	PF3D7_1454700	0.857
PF3D7_0525800	PF3D7_1412000	0.709
PF3D7_1001900	PF3D7_1002100	0.86
PF3D7_1130200	PF3D7_1317800	0.999
PF3D7_0217800	PF3D7_0517000	0.981
PF3D7_0731500	PF3D7_1017500	0.87
PF3D7_0212600	PF3D7_0323400	0.704
PF3D7_1251500	PF3D7_1317900	0.756
PF3D7_0719700	PF3D7_1126200	0.999
PF3D7_0215300	PF3D7_1016700	0.718
PF3D7_1026800	PF3D7_1325100	0.822
PF3D7_0411000	PF3D7_1370300	0.713
PF3D7_0308300	PF3D7_1251200	0.965
PF3D7_0214200	PF3D7_0614500	0.886
PF3D7_0826700	PF3D7_1109900	0.979
PF3D7_1224300	PF3D7_1312900	0.994
PF3D7_1130200	PF3D7_1357100	0.974
PF3D7_1242700	PF3D7_1312900	0.924
PF3D7_1211800	PF3D7_1304100	0.701
PF3D7_0704200	PF3D7_1125400	0.706
PF3D7_1323100	PF3D7_1351400	0.999
PF3D7_0913800	PF3D7_0934600	0.726
PF3D7_1139900	PF3D7_1360200	0.836
PF3D7_0409100	PF3D7_1110200	0.995
PF3D7_0719600	PF3D7_1134000	0.754
PF3D7_1211800	PF3D7_1444300	0.815
PF3D7_0312800	PF3D7_1429700	0.997
PF3D7_0921800	PF3D7_1027100	0.902
PF3D7_1216900	PF3D7_1318800	0.914
PF3D7_1417500	PF3D7_1438000	0.78
PF3D7_0611700	PF3D7_1144300	0.9
PF3D7_0103600	PF3D7_0810600	0.926
PF3D7_0508500	PF3D7_1308000	0.777
PF3D7_0802800	PF3D7_1012200	0.852
PF3D7_0319600	PF3D7_0826700	0.775
PF3D7_1126500	PF3D7_1471000	0.708
PF3D7_0415900	PF3D7_1407100	0.923
PF3D7_1307300	PF3D7_1415200	0.916
PF3D7_0723800	PF3D7_1228600	0.72
PF3D7_0802800	PF3D7_1446600	0.742
PF3D7_0214400	PF3D7_0716100	0.762
PF3D7_0319700	PF3D7_0813700	0.723
PF3D7_0207100	PF3D7_0316000	0.729
PF3D7_0708400	PF3D7_0812600	0.944
PF3D7_1359000	PF3D7_1419100	0.742
PF3D7_0705700	PF3D7_1460300	0.999
PF3D7_1036000	PF3D7_1310700	0.957
PF3D7_0813100	PF3D7_1315300	0.779
PF3D7_0109000	PF3D7_1036000	0.917
PF3D7_0426000	PF3D7_0937800	0.701
PF3D7_0406100	PF3D7_1341900	0.999
PF3D7_0613800	PF3D7_0723800	0.822
PF3D7_0423500	PF3D7_0924500	0.715
PF3D7_0419800	PF3D7_1143300	0.765
PF3D7_1401100	PF3D7_1427100	0.8
PF3D7_0320300	PF3D7_1124900	0.726
PF3D7_1134000	PF3D7_1308200	0.876
PF3D7_0922200	PF3D7_1343000	0.911
PF3D7_0309600	PF3D7_1408600	0.999
PF3D7_0725400	PF3D7_0808200	0.901
PF3D7_0506100	PF3D7_1005100	0.768
PF3D7_0618000	PF3D7_1031400.2	0.841
PF3D7_0913800	PF3D7_1037500	0.724
PF3D7_0218500	PF3D7_0822300	0.999
PF3D7_0520000	PF3D7_1341200	0.999
PF3D7_0507500	PF3D7_0731500	0.91
PF3D7_0604100	PF3D7_1315300	0.87
PF3D7_1144000	PF3D7_1308300	0.999
PF3D7_0305600	PF3D7_0505500	0.789
PF3D7_0110800	PF3D7_1033600	0.72
PF3D7_1149200	PF3D7_1252900	0.874
PF3D7_0503800	PF3D7_0516200	0.999
PF3D7_0308700	PF3D7_0817600	0.795
PF3D7_1235300	PF3D7_1353800	0.95
PF3D7_0424500	PF3D7_1001500	0.739
PF3D7_0322000	PF3D7_1134000	0.771
PF3D7_0520000	PF3D7_0904400	0.905
PF3D7_0409400	PF3D7_1362200	0.752
PF3D7_0706400	PF3D7_1224300	0.9
PF3D7_0708400	PF3D7_1149200	0.762
PF3D7_0813400	PF3D7_1445900	0.705
PF3D7_1317100	PF3D7_1437200	0.997
PF3D7_0302500	PF3D7_1252100	0.901
PF3D7_0908600	PF3D7_1018600	0.718
PF3D7_0103800	PF3D7_1362200	0.763
PF3D7_1142500	PF3D7_1426000	0.984
PF3D7_1143400	PF3D7_1424100	0.867
PF3D7_0919300	PF3D7_1316200	0.799
PF3D7_0318200	PF3D7_1449700	0.797
PF3D7_1104200	PF3D7_1329000	0.958
PF3D7_0612900	PF3D7_1329000	0.843
PF3D7_0506900	PF3D7_1009700	0.865
PF3D7_1020000	PF3D7_1306900	0.847
PF3D7_0302000	PF3D7_1232400	0.712
PF3D7_0523200	PF3D7_0523800	0.723
PF3D7_0409200	PF3D7_1251500	0.801
PF3D7_0402300	PF3D7_1204900	0.894
PF3D7_1247900	PF3D7_1461200	0.932
PF3D7_0925200	PF3D7_1124800	0.758
PF3D7_0516200	PF3D7_0826700	0.999
PF3D7_0716200	PF3D7_1417500	0.746
PF3D7_0307200	PF3D7_0517000	0.996
PF3D7_0105400.2	PF3D7_1223100	0.777
PF3D7_0604100	PF3D7_1035700	0.84
PF3D7_0827100	PF3D7_1366500	0.748
PF3D7_1126700	PF3D7_1133400	0.9
PF3D7_0204500	PF3D7_1033100	0.87
PF3D7_0212300	PF3D7_1408600	0.95
PF3D7_0516900	PF3D7_1110600	0.98
PF3D7_0719300	PF3D7_0729400	0.787
PF3D7_0507100	PF3D7_0705700	0.996
PF3D7_0320700	PF3D7_1437200	0.711
PF3D7_1130200	PF3D7_1245400	0.961
PF3D7_0424100	PF3D7_1332200	0.919
PF3D7_0703900	PF3D7_1226700	0.731
PF3D7_1236200	PF3D7_1431100	0.762
PF3D7_0923800.2	PF3D7_1345100	0.901
PF3D7_1110200	PF3D7_1450700	0.709
PF3D7_1214600	PF3D7_1454500	0.911
PF3D7_1146000	PF3D7_1471000	0.854
PF3D7_0713200	PF3D7_0733000	0.74
PF3D7_0317600	PF3D7_0904400	0.912
PF3D7_0322900	PF3D7_1433600	0.907
PF3D7_0210600	PF3D7_1469200	0.815
PF3D7_0516900	PF3D7_1325100	0.874
PF3D7_0405900	PF3D7_1332200	0.891
PF3D7_0318200	PF3D7_0708800	0.776
PF3D7_0830500	PF3D7_1148800	0.709
PF3D7_0612200	PF3D7_1343100	0.832
PF3D7_0602100	PF3D7_1030100	0.85
PF3D7_1104200	PF3D7_1134700	0.956
PF3D7_0516900	PF3D7_1408600	0.999
PF3D7_1233900	PF3D7_1430200	0.724
PF3D7_0830500	PF3D7_1404800	0.879
PF3D7_1349200	PF3D7_1442300	0.999
PF3D7_1124900	PF3D7_1132700	0.999
PF3D7_1111000	PF3D7_1429400	0.849
PF3D7_0422400	PF3D7_1304900	0.743
PF3D7_0105400.2	PF3D7_1031200	0.815
PF3D7_0507500	PF3D7_0525800	0.91
PF3D7_0623800	PF3D7_1302700	0.704
PF3D7_1012600	PF3D7_1438900	0.873
PF3D7_0421100	PF3D7_0800200	0.786
PF3D7_1357000	PF3D7_1412500	0.876
PF3D7_0402300	PF3D7_0506900	0.714
PF3D7_0201700	PF3D7_0201900	0.872
PF3D7_0507200	PF3D7_1343100	0.765
PF3D7_1222700	PF3D7_1246400	0.984
PF3D7_1338300	PF3D7_1341300	0.803
PF3D7_0710600	PF3D7_1451100	0.963
PF3D7_1235300	PF3D7_1353900	0.95
PF3D7_1232500	PF3D7_1310700	0.792
PF3D7_0420100	PF3D7_1013100	0.912
PF3D7_0102200	PF3D7_1149000	0.95
PF3D7_0423800	PF3D7_1125700	0.887
PF3D7_1346100	PF3D7_1433500	0.775
PF3D7_1251200	PF3D7_1452000	0.915
PF3D7_1404500	PF3D7_1431300	0.844
PF3D7_1211800	PF3D7_1410200	0.759
PF3D7_1132200	PF3D7_1331700	0.782
PF3D7_0215700	PF3D7_0517300	0.93
PF3D7_0731500	PF3D7_1026600	0.87
PF3D7_1235600	PF3D7_1433500	0.81
PF3D7_0406100	PF3D7_0804500	0.966
PF3D7_0205900	PF3D7_1117100	0.983
PF3D7_0303200	PF3D7_1146600	0.896
PF3D7_0210600	PF3D7_1332200	0.862
PF3D7_0520000	PF3D7_1126200	0.999
PF3D7_1017900	PF3D7_1470900	0.999
PF3D7_0319600	PF3D7_1465900	0.86
PF3D7_0604100	PF3D7_1406800	0.762
PF3D7_1142500	PF3D7_1460700	0.986
PF3D7_0203700	PF3D7_0720100	0.742
PF3D7_1027400	PF3D7_1110200	0.9
PF3D7_0308900	PF3D7_0725200	0.703
PF3D7_0409600	PF3D7_0934100	0.734
PF3D7_0920800	PF3D7_1407900	0.753
PF3D7_0502400	PF3D7_0814500	0.742
PF3D7_0817600	PF3D7_1345600	0.877
PF3D7_0821500	PF3D7_1124800	0.883
PF3D7_1118500	PF3D7_1354300	0.914
PF3D7_0210000	PF3D7_1308300	0.923
PF3D7_0723400	PF3D7_1457700	0.78
PF3D7_1246400	PF3D7_1308000	0.713
PF3D7_0822900	PF3D7_1204900	0.769
PF3D7_0302200	PF3D7_1315300	0.712
PF3D7_1004400	PF3D7_1304900	0.917
PF3D7_0108500	PF3D7_0707500	0.77
PF3D7_0524800	PF3D7_1124200	0.715
PF3D7_0708100	PF3D7_1433000	0.724
PF3D7_0206000	PF3D7_0904800	0.815
PF3D7_0303200	PF3D7_0704300	0.871
PF3D7_0808600	PF3D7_0937800	0.755
PF3D7_1230600	PF3D7_1461200	0.722
PF3D7_0814000	PF3D7_1242700	0.999
PF3D7_1451100	PF3D7_1468700	0.785
PF3D7_1009700	PF3D7_1412000	0.927
PF3D7_0206000	PF3D7_1107400	0.966
PF3D7_0508500	PF3D7_1252100	0.766
PF3D7_0726900	PF3D7_1355700	0.8
PF3D7_0804500	PF3D7_1433400	0.852
PF3D7_1213700	PF3D7_1415200	0.993
PF3D7_0630500	PF3D7_1451900	0.976
PF3D7_0722200	PF3D7_1117400	0.77
PF3D7_0821700	PF3D7_1019400	0.999
PF3D7_0721600	PF3D7_0813900	0.999
PF3D7_1142600	PF3D7_1406000	0.93
PF3D7_0927300	PF3D7_1238600	0.881
PF3D7_0814000	PF3D7_0903900	0.999
PF3D7_0405000	PF3D7_1027400	0.922
PF3D7_0715900	PF3D7_1211700	0.746
PF3D7_0308300	PF3D7_1342600	0.878
PF3D7_0810300	PF3D7_1035100	0.889
PF3D7_0301800	PF3D7_0814500	0.907
PF3D7_0217100	PF3D7_0618500	0.86
PF3D7_1132800	PF3D7_1224100	0.782
PF3D7_0613700	PF3D7_1034000	0.764
PF3D7_0528100	PF3D7_1118100	0.9
PF3D7_0617800	PF3D7_1105100	0.999
PF3D7_1110200	PF3D7_1231500	0.997
PF3D7_0813100	PF3D7_1145200	0.906
PF3D7_0904400	PF3D7_1433600	0.975
PF3D7_1027400	PF3D7_1332700	0.925
PF3D7_0802600	PF3D7_1412000	0.901
PF3D7_0605300	PF3D7_1316000	0.884
PF3D7_0921200	PF3D7_1463400	0.708
PF3D7_0821700	PF3D7_1461300	0.989
PF3D7_1342000	PF3D7_1465900	0.999
PF3D7_0919200	PF3D7_1310200	0.756
PF3D7_0219200	PF3D7_0322900	0.999
PF3D7_0423500	PF3D7_0831600	0.87
PF3D7_0308300	PF3D7_0817600	0.741
PF3D7_0821500	PF3D7_1016600	0.811
PF3D7_0404700	PF3D7_1431400	0.745
PF3D7_0918000	PF3D7_1223100	0.894
PF3D7_0517300	PF3D7_0520300	0.914
PF3D7_0630900	PF3D7_0703900	0.734
PF3D7_0814500	PF3D7_1427100	0.766
PF3D7_1302700	PF3D7_1431800	0.907
PF3D7_0724400	PF3D7_1434700	0.97
PF3D7_0207000	PF3D7_1252100	0.739
PF3D7_1037500	PF3D7_1125800	0.728
PF3D7_0918000	PF3D7_0934800	0.83
PF3D7_0219200	PF3D7_0728000	0.925
PF3D7_0927300	PF3D7_1405600	0.782
PF3D7_0821700	PF3D7_1109900	0.999
PF3D7_0208200	PF3D7_0716100	0.863
PF3D7_1011400	PF3D7_1466300	0.996
PF3D7_1027400	PF3D7_1241800	0.929
PF3D7_1126000	PF3D7_1445100	0.917
PF3D7_0618000	PF3D7_0911100	0.848
PF3D7_0720400	PF3D7_1006600	0.714
PF3D7_1145400	PF3D7_1246200	0.819
PF3D7_0918000	PF3D7_1323700	0.95
PF3D7_1008800	PF3D7_1251500	0.829
PF3D7_0516900	PF3D7_1224300	0.934
PF3D7_0929400	PF3D7_1409400	0.893
PF3D7_0731200	PF3D7_1149200	0.802
PF3D7_0415900	PF3D7_0826700	0.999
PF3D7_0716200	PF3D7_1302000	0.819
PF3D7_1125800	PF3D7_1301600	0.976
PF3D7_0504400	PF3D7_0821300	0.824
PF3D7_0411400	PF3D7_1251500	0.806
PF3D7_1008700	PF3D7_1246200	0.87
PF3D7_0423800	PF3D7_1323700	0.799
PF3D7_0527000	PF3D7_0821000	0.719
PF3D7_0206600	PF3D7_0215700	0.983
PF3D7_1026800	PF3D7_1134000	0.782
PF3D7_0317500	PF3D7_0422300	0.773
PF3D7_1224300	PF3D7_1474900	0.884
PF3D7_0525000	PF3D7_0817300	0.912
PF3D7_0308000	PF3D7_1037100	0.922
PF3D7_0422400	PF3D7_1408600	0.999
PF3D7_0923000	PF3D7_1447000	0.924
PF3D7_0618000	PF3D7_1335100	0.836
PF3D7_0528300	PF3D7_0822900	0.836
PF3D7_0316800	PF3D7_0814200	0.719
PF3D7_1367600	PF3D7_1460300	0.737
PF3D7_0618500	PF3D7_0720400	0.736
PF3D7_0507100	PF3D7_0519400	0.999
PF3D7_0217800	PF3D7_1460300	0.999
PF3D7_0905400	PF3D7_0918000	0.937
PF3D7_0507200	PF3D7_1463900	0.941
PF3D7_1021500	PF3D7_1118500	0.884
PF3D7_0306900	PF3D7_0719600	0.999
PF3D7_0306900	PF3D7_1246800	0.9
PF3D7_0404700	PF3D7_1014100	0.785
PF3D7_0813900	PF3D7_1410600	0.937
PF3D7_1363400	PF3D7_1418000	0.937
PF3D7_0407800	PF3D7_1344300	0.865
PF3D7_1019400	PF3D7_1331300	0.903
PF3D7_0513300	PF3D7_1338300	0.763
PF3D7_0507100	PF3D7_1461200	0.983
PF3D7_1206600	PF3D7_1447000	0.933
PF3D7_0319300	PF3D7_0629800	0.772
PF3D7_0205500	PF3D7_1307300	0.92
PF3D7_0722200	PF3D7_0932200	0.709
PF3D7_1328100	PF3D7_1338100	0.999
PF3D7_0903900	PF3D7_1204300	0.75
PF3D7_1136700.2	PF3D7_1232500	0.703
PF3D7_0407800	PF3D7_1223100	0.895
PF3D7_0420100	PF3D7_1469300	0.996
PF3D7_0731800	PF3D7_1478100	0.791
PF3D7_0322300	PF3D7_1211700	0.734
PF3D7_0405900	PF3D7_1017500	0.707
PF3D7_0324900	PF3D7_0412900	0.785
PF3D7_0217800	PF3D7_1351400	0.998
PF3D7_0703500	PF3D7_1302700	0.763
PF3D7_0315100	PF3D7_0703500	0.778
PF3D7_0518300	PF3D7_0807800	0.999
PF3D7_0307100	PF3D7_1460700	0.999
PF3D7_0322900	PF3D7_1137100	0.888
PF3D7_1035300	PF3D7_1108100	0.786
PF3D7_0817600	PF3D7_1037500	0.85
PF3D7_0220100	PF3D7_0424500	0.738
PF3D7_0608800	PF3D7_1433500	0.749
PF3D7_0622200	PF3D7_1461900	0.803
PF3D7_0932100	PF3D7_1439500	0.838
PF3D7_0205900	PF3D7_1402300	0.999
PF3D7_0822000	PF3D7_1126200	0.994
PF3D7_0205500	PF3D7_1332700	0.927
PF3D7_1364800	PF3D7_1439100	0.9
PF3D7_0506900	PF3D7_0722200	0.895
PF3D7_0716100	PF3D7_1107700	0.998
PF3D7_0503800	PF3D7_1204300	0.761
PF3D7_1130200	PF3D7_1365900	0.997
PF3D7_0802600	PF3D7_1036500	0.706
PF3D7_0304100	PF3D7_1035900	0.902
PF3D7_0829300	PF3D7_1209200	0.999
PF3D7_0620400	PF3D7_1232500	0.776
PF3D7_1124800	PF3D7_1431300	0.807
PF3D7_0201800	PF3D7_1433500	0.783
PF3D7_0414900	PF3D7_0722200	0.871
PF3D7_1364100	PF3D7_1439400	0.77
PF3D7_1036000	PF3D7_1337800	0.891
PF3D7_0707900	PF3D7_1124900	0.888
PF3D7_0415900	PF3D7_1302800	0.999
PF3D7_0307100	PF3D7_1365900	0.998
PF3D7_0929400	PF3D7_1031200	0.89
PF3D7_0816000	PF3D7_1021500	0.748
PF3D7_0801500	PF3D7_1302700	0.935
PF3D7_0823300	PF3D7_1008000	0.927
PF3D7_1223100	PF3D7_1232500	0.91
PF3D7_1410600	PF3D7_1451100	0.934
PF3D7_1001500	PF3D7_1230900	0.756
PF3D7_0308300	PF3D7_0725400	0.848
PF3D7_0405900	PF3D7_0501600	0.918
PF3D7_0710600	PF3D7_1351400	0.999
PF3D7_0932100	PF3D7_1223100	0.763
PF3D7_0102900	PF3D7_1126000	0.847
PF3D7_0921800	PF3D7_1109400	0.989
PF3D7_1307100	PF3D7_1358100	0.779
PF3D7_1030500	PF3D7_1306400	0.999
PF3D7_0919400	PF3D7_1338300	0.793
PF3D7_0208200	PF3D7_0419800	0.86
PF3D7_1021600	PF3D7_1436000	0.863
PF3D7_1436000	PF3D7_1454400	0.784
PF3D7_0802200	PF3D7_1027300	0.881
PF3D7_0708800	PF3D7_1126200	0.734
PF3D7_1350200	PF3D7_1461600	0.938
PF3D7_1227800	PF3D7_1471000	0.788
PF3D7_1035700	PF3D7_1335100	0.936
PF3D7_0727200	PF3D7_1333200	0.767
PF3D7_0520900	PF3D7_1365500	0.772
PF3D7_0528400	PF3D7_1310200	0.865
PF3D7_1019400	PF3D7_1142600	0.999
PF3D7_0106300	PF3D7_0603500	0.742
PF3D7_1012600	PF3D7_1366500	0.787
PF3D7_0910600	PF3D7_1034000	0.919
PF3D7_1003800	PF3D7_1365900	0.707
PF3D7_0402300	PF3D7_1344300	0.798
PF3D7_1341500	PF3D7_1472600	0.822
PF3D7_1030100	PF3D7_1418900	0.937
PF3D7_1030100	PF3D7_1359300	0.747
PF3D7_1143300	PF3D7_1424100	0.97
PF3D7_1109400	PF3D7_1404500	0.966
PF3D7_0424800	PF3D7_1401100	0.709
PF3D7_0302200	PF3D7_1232500	0.854
PF3D7_0210700	PF3D7_1211800	0.711
PF3D7_0202200	PF3D7_1401400	0.746
PF3D7_1033700	PF3D7_1338100	0.973
PF3D7_1001200	PF3D7_1012400	0.907
PF3D7_1206600	PF3D7_1459000	0.944
PF3D7_0721600	PF3D7_0923000	0.945
PF3D7_1028300	PF3D7_1454200	0.74
PF3D7_0206700	PF3D7_1431800	0.911
PF3D7_1126700	PF3D7_1401600	0.83
PF3D7_1317800	PF3D7_1468700	0.956
PF3D7_0528400	PF3D7_1133000	0.735
PF3D7_0315100	PF3D7_1031500	0.907
PF3D7_1238600	PF3D7_1335100	0.838
PF3D7_0405200	PF3D7_0423500	0.729
PF3D7_1108500	PF3D7_1324900	0.906
PF3D7_0105400.2	PF3D7_0905500	0.753
PF3D7_0705700	PF3D7_1408600	0.999
PF3D7_0215700	PF3D7_1461200	0.793
PF3D7_0212100	PF3D7_1014600	0.924
PF3D7_0102500	PF3D7_1318700	0.786
PF3D7_0411400	PF3D7_1329000	0.946
PF3D7_1226700	PF3D7_1249900	0.823
PF3D7_0604100	PF3D7_1364100	0.792
PF3D7_0423800	PF3D7_1035300	0.869
PF3D7_0319600	PF3D7_1323400	0.716
PF3D7_0722600	PF3D7_0931100	0.826
PF3D7_0102200	PF3D7_0902500	0.917
PF3D7_0512600	PF3D7_1211800	0.75
PF3D7_0802800	PF3D7_1136700.2	0.804
PF3D7_0821500	PF3D7_1475600	0.797
PF3D7_0704500	PF3D7_1128900	0.888
PF3D7_0729300	PF3D7_1213900	0.76
PF3D7_1354300	PF3D7_1429500	0.713
PF3D7_0408000	PF3D7_1337800	0.715
PF3D7_1126200	PF3D7_1461300	0.999
PF3D7_1146600	PF3D7_1252100	0.874
PF3D7_0218400	PF3D7_1134700	0.749
PF3D7_0520000	PF3D7_1144000	0.999
PF3D7_1134700	PF3D7_1227800	0.803
PF3D7_0214400	PF3D7_1006700	0.818
PF3D7_1001500	PF3D7_1240100	0.726
PF3D7_0404700	PF3D7_1013800	0.91
PF3D7_0115700	PF3D7_0828200	0.711
PF3D7_1237600	PF3D7_1428300	0.902
PF3D7_0905400	PF3D7_0924500	0.758
PF3D7_1457300	PF3D7_1474600	0.913
PF3D7_1452100	PF3D7_1469200	0.753
PF3D7_1331300	PF3D7_1441200	0.903
PF3D7_1136900	PF3D7_1327300	0.912
PF3D7_0925200	PF3D7_1027100	0.741
PF3D7_1122900	PF3D7_1412500	0.802
PF3D7_0305500	PF3D7_0704600	0.817
PF3D7_0215700	PF3D7_1404500	0.758
PF3D7_0716100	PF3D7_1217200	0.894
PF3D7_0322900	PF3D7_1366600	0.9
PF3D7_0731500	PF3D7_1316200	0.72
PF3D7_1020700	PF3D7_1230600	0.971
PF3D7_0817600	PF3D7_0911100	0.804
PF3D7_0912400	PF3D7_1224000	0.9
PF3D7_0932000	PF3D7_1036000	0.891
PF3D7_0911100	PF3D7_1252100	0.742
PF3D7_1143100	PF3D7_1344300	0.87
PF3D7_0422400	PF3D7_1246800	0.9
[truncated: 38,517 more rows]

## Sheet: ET_network
Gene1	Gene2	Score
PF3D7_0423500	PF3D7_1232500	0.888
PF3D7_0708100	PF3D7_1213700	0.999
PF3D7_1358800	PF3D7_1417500	0.864
PF3D7_0210000	PF3D7_1323400	0.989
PF3D7_1303100	PF3D7_1428600	0.883
PF3D7_1019400	PF3D7_1421200	0.977
PF3D7_0610800	PF3D7_1120100	0.872
PF3D7_0602400	PF3D7_1308200	0.709
PF3D7_1306200	PF3D7_1317100	0.847
PF3D7_0317200	PF3D7_1013600	0.778
PF3D7_0318700	PF3D7_0507500	0.898
PF3D7_1230600	PF3D7_1415800	0.831
PF3D7_0603700	PF3D7_1461900	0.863
PF3D7_0110800	PF3D7_1212700	0.867
PF3D7_0307100	PF3D7_1426000	0.999
PF3D7_1108700	PF3D7_1124000	0.85
PF3D7_0111500	PF3D7_0613400	0.87
PF3D7_0417200	PF3D7_1033100	0.799
PF3D7_0215700	PF3D7_0405400	0.991
PF3D7_1238900	PF3D7_1342600	0.89
PF3D7_1123900	PF3D7_1125500	0.942
PF3D7_0822300	PF3D7_1220100	0.805
PF3D7_0619900	PF3D7_1420000	0.98
PF3D7_0413600	PF3D7_1365900	0.938
PF3D7_0722400	PF3D7_1338300	0.945
PF3D7_1222700	PF3D7_1469200	0.732
PF3D7_0520000	PF3D7_1419700	0.736
PF3D7_0630900	PF3D7_0729400	0.971
PF3D7_0520600	PF3D7_1304900	0.942
PF3D7_0109800	PF3D7_1117500	0.9
PF3D7_1332900	PF3D7_1367700	0.928
PF3D7_0403800	PF3D7_0810300	0.787
PF3D7_0418200	PF3D7_0507100	0.736
PF3D7_1302800	PF3D7_1429700	0.718
PF3D7_0218400	PF3D7_1358100	0.907
PF3D7_1137500	PF3D7_1323400	0.992
PF3D7_0210600	PF3D7_0934800	0.779
PF3D7_1109900	PF3D7_1317800	0.999
PF3D7_0412100	PF3D7_1137500	0.981
PF3D7_0818900	PF3D7_1011400	0.915
PF3D7_1115700	PF3D7_1407800	0.788
PF3D7_0422700	PF3D7_0713400	0.723
PF3D7_0306900	PF3D7_1331800	0.999
PF3D7_0820700	PF3D7_1108500	0.998
PF3D7_1026800	PF3D7_1212700	0.99
PF3D7_0516400	PF3D7_1132200	0.876
PF3D7_0711000	PF3D7_1237000	0.794
PF3D7_0215300	PF3D7_0424500	0.832
PF3D7_1119000	PF3D7_1338100	0.981
PF3D7_1012600	PF3D7_1211800	0.859
PF3D7_0411400	PF3D7_1332700	0.816
PF3D7_1130200	PF3D7_1204300	0.834
PF3D7_1123900	PF3D7_1461200	0.933
PF3D7_0830600	PF3D7_1253300	0.842
PF3D7_0307500	PF3D7_0920200	0.754
PF3D7_1144300	PF3D7_1338200	0.9
PF3D7_0306900	PF3D7_1123400	0.965
PF3D7_1003500	PF3D7_1341200	0.999
PF3D7_0731500	PF3D7_1251200	0.896
PF3D7_0626800	PF3D7_0708100	0.9
PF3D7_0507100	PF3D7_1132200	0.816
PF3D7_0509100	PF3D7_1319400	0.775
PF3D7_0823300	PF3D7_1106000	0.736
PF3D7_0710900	PF3D7_1414300	0.971
PF3D7_0903900	PF3D7_1019400	0.999
PF3D7_0708800	PF3D7_0920800	0.876
PF3D7_1213800	PF3D7_1350100	0.973
PF3D7_0212300	PF3D7_1323400	0.957
PF3D7_0310500	PF3D7_0508700	0.744
PF3D7_0818400	PF3D7_0821500	0.769
PF3D7_1233000	PF3D7_1307600	0.914
PF3D7_1229100	PF3D7_1230900	0.717
PF3D7_1209300	PF3D7_1223100	0.766
PF3D7_0307100	PF3D7_0918300	0.926
PF3D7_0307100	PF3D7_0520000	0.999
PF3D7_1030500	PF3D7_1474800	0.999
PF3D7_1227800	PF3D7_1445400	0.778
PF3D7_1127100	PF3D7_1332600	0.706
PF3D7_0510500	PF3D7_0605800	0.862
PF3D7_0615500	PF3D7_1028200	0.703
PF3D7_0507300	PF3D7_1125800	0.828
PF3D7_0626800	PF3D7_1431800	0.907
PF3D7_0630500	PF3D7_0721300	0.85
PF3D7_0100200	PF3D7_1240300	0.752
PF3D7_0210200	PF3D7_1448500	0.712
PF3D7_0419400	PF3D7_0505400	0.726
PF3D7_0322300	PF3D7_0724600	0.715
PF3D7_0706400	PF3D7_1317800	0.977
PF3D7_0507100	PF3D7_1331300	0.908
PF3D7_0317600	PF3D7_1218600	0.769
PF3D7_1419100	PF3D7_1421400	0.937
PF3D7_1357700	PF3D7_1448000	0.999
PF3D7_0215700	PF3D7_0312800	0.856
PF3D7_1019400	PF3D7_1308300	0.997
PF3D7_1347200	PF3D7_1426200	0.726
PF3D7_0930300	PF3D7_1013800	0.743
PF3D7_1322000	PF3D7_1448500	0.766
PF3D7_0829200	PF3D7_0921900	0.795
PF3D7_0504400	PF3D7_0904800	0.786
PF3D7_0608700	PF3D7_1106000	0.851
PF3D7_0719600	PF3D7_1004000	0.999
PF3D7_1317900	PF3D7_1467200	0.798
PF3D7_1218600	PF3D7_1350100	0.774
PF3D7_0505500	PF3D7_1130700	0.761
PF3D7_0422400	PF3D7_1130200	0.995
PF3D7_0517700	PF3D7_1308200	0.846
PF3D7_0414700	PF3D7_0729300	0.97
PF3D7_1365900	PF3D7_1426000	0.999
PF3D7_1015100	PF3D7_1030100	0.731
PF3D7_0524800	PF3D7_0808300	0.757
PF3D7_0623200	PF3D7_1232300	0.71
PF3D7_0405000	PF3D7_1206600	0.942
PF3D7_0520300	PF3D7_0909800	0.933
PF3D7_1246600	PF3D7_1468800	0.965
PF3D7_0507700	PF3D7_1211800	0.873
PF3D7_0504400	PF3D7_1366500	0.963
PF3D7_0310400	PF3D7_0705400	0.839
PF3D7_0322000	PF3D7_1323100	0.819
PF3D7_1417800	PF3D7_1456000	0.748
PF3D7_1001100.2	PF3D7_1200700	0.721
PF3D7_0108000	PF3D7_1239700	0.776
PF3D7_0716200	PF3D7_1322100	0.79
PF3D7_1223100	PF3D7_1344300	0.712
PF3D7_1356300	PF3D7_1418000	0.765
PF3D7_0706400	PF3D7_1414300	0.999
PF3D7_0719700	PF3D7_0919600	0.912
PF3D7_0820700	PF3D7_1433500	0.738
PF3D7_0807100	PF3D7_1433500	0.817
PF3D7_0109000	PF3D7_1218000	0.794
PF3D7_1344200	PF3D7_1433500	0.802
PF3D7_1341300	PF3D7_1367600	0.896
PF3D7_1202900	PF3D7_1433500	0.779
PF3D7_0801500	PF3D7_1107700	0.955
PF3D7_0422400	PF3D7_0613400	0.973
PF3D7_1429700	PF3D7_1461200	0.964
PF3D7_0510100	PF3D7_1141400	0.715
PF3D7_0613400	PF3D7_1342000	0.999
PF3D7_1009900	PF3D7_1369500	0.702
PF3D7_0719700	PF3D7_1106100	0.801
PF3D7_0516300	PF3D7_0921800	0.71
PF3D7_1242700	PF3D7_1304900	0.879
PF3D7_0419300	PF3D7_1117800	0.796
PF3D7_0821300	PF3D7_0909900	0.728
PF3D7_0414000	PF3D7_1123800	0.834
PF3D7_0607000	PF3D7_1130200	0.955
PF3D7_0306900	PF3D7_0316800	0.999
PF3D7_0704300	PF3D7_1013600	0.776
PF3D7_0729400	PF3D7_1227800	0.898
PF3D7_0319300	PF3D7_1037000	0.965
PF3D7_1303800	PF3D7_1437200	0.772
PF3D7_0415900	PF3D7_0611700	0.999
PF3D7_0706400	PF3D7_1221200	0.786
PF3D7_1246200	PF3D7_1410400	0.907
PF3D7_0918900	PF3D7_1214600	0.777
PF3D7_0721600	PF3D7_1132200	0.804
PF3D7_0306900	PF3D7_0814000	0.999
PF3D7_0706400	PF3D7_0725200	0.911
PF3D7_0919600	PF3D7_1323400	0.904
PF3D7_1117100	PF3D7_1414000	0.995
PF3D7_0418200	PF3D7_1419700	0.997
PF3D7_0312300	PF3D7_1402300	0.999
PF3D7_0511200	PF3D7_1019500.2	0.73
PF3D7_0818400	PF3D7_1123900	0.8
PF3D7_0312300	PF3D7_0803800	0.999
PF3D7_1017200	PF3D7_1435300	0.769
PF3D7_0931100	PF3D7_1224400	0.838
PF3D7_0524900	PF3D7_0920800	0.769
PF3D7_1343100	PF3D7_1456000	0.709
PF3D7_0710600	PF3D7_1026800	0.995
PF3D7_1004000	PF3D7_1134700	0.763
PF3D7_0307100	PF3D7_1005500	0.905
PF3D7_1438900	PF3D7_1462800	0.901
PF3D7_0316800	PF3D7_1130100	0.987
PF3D7_1415800	PF3D7_1417500	0.873
PF3D7_0807900	PF3D7_1461900	0.729
PF3D7_0828200	PF3D7_1367700	0.868
PF3D7_0626100	PF3D7_1323000	0.735
PF3D7_0109000	PF3D7_1031200	0.866
PF3D7_1001400	PF3D7_1302000	0.76
PF3D7_0719700	PF3D7_1460300	0.987
PF3D7_0316800	PF3D7_0618300	0.999
PF3D7_0623800	PF3D7_1114200	0.735
PF3D7_0705700	PF3D7_1008900	0.771
PF3D7_1136600	PF3D7_1329000	0.76
PF3D7_1111000	PF3D7_1445200	0.82
PF3D7_0413600	PF3D7_1248900	0.999
PF3D7_1422800	PF3D7_1433500	0.944
PF3D7_0630500	PF3D7_1134700	0.989
PF3D7_0509400	PF3D7_1302700	0.983
PF3D7_1027800	PF3D7_1206600	0.921
PF3D7_0624000	PF3D7_1015900	0.79
PF3D7_0422400	PF3D7_1342000	0.999
PF3D7_1213600	PF3D7_1246200	0.769
PF3D7_0705700	PF3D7_0710600	0.991
PF3D7_1110200	PF3D7_1317000	0.873
PF3D7_0802300	PF3D7_1107700	0.906
PF3D7_1332700	PF3D7_1359200	0.9
PF3D7_1004000	PF3D7_1421200	0.934
PF3D7_1032500	PF3D7_1144700	0.84
PF3D7_0219200	PF3D7_0716800	0.923
PF3D7_0823800	PF3D7_1222300	0.783
PF3D7_0726300	PF3D7_1427500	0.996
PF3D7_0219200	PF3D7_1204300	0.763
PF3D7_0816800	PF3D7_1347100	0.734
PF3D7_0902500	PF3D7_1427100	0.793
PF3D7_0518300	PF3D7_1365900	0.946
PF3D7_0411400	PF3D7_1405600	0.914
PF3D7_0704500	PF3D7_0715200	0.848
PF3D7_1104200	PF3D7_1415200	0.916
PF3D7_0403800	PF3D7_1410400	0.719
PF3D7_0712900	PF3D7_1100200	0.897
PF3D7_0312800	PF3D7_1460700	0.999
PF3D7_0319700	PF3D7_0509400	0.808
PF3D7_0923200	PF3D7_1211800	0.703
PF3D7_1129400	PF3D7_1229500	0.855
PF3D7_1001500	PF3D7_1301700	0.939
PF3D7_1351600	PF3D7_1433500	0.707
PF3D7_0207800	PF3D7_0612200	0.798
PF3D7_1124900	PF3D7_1366600	0.931
PF3D7_1027100	PF3D7_1469300	0.977
PF3D7_0617100	PF3D7_1218300	0.94
PF3D7_0503000	PF3D7_1457000	0.935
PF3D7_0414700	PF3D7_1428300	0.984
PF3D7_0816000	PF3D7_1029600	0.731
PF3D7_0930500	PF3D7_1409900	0.908
PF3D7_1331700	PF3D7_1350100	0.972
PF3D7_1106300	PF3D7_1107300	0.807
PF3D7_1010600	PF3D7_1107300	0.991
PF3D7_1109900	PF3D7_1123400	0.936
PF3D7_0407800	PF3D7_0612200	0.769
PF3D7_0306400	PF3D7_1035800	0.723
PF3D7_1148900	PF3D7_1201200	0.744
PF3D7_1123400	PF3D7_1302800	0.936
PF3D7_0110800	PF3D7_0610900	0.769
PF3D7_0324900	PF3D7_1240900	0.918
PF3D7_1106000	PF3D7_1408100	0.743
PF3D7_1005100	PF3D7_1241800	0.858
PF3D7_1105600	PF3D7_1221900	0.743
PF3D7_1015900	PF3D7_1433500	0.822
PF3D7_0300400	PF3D7_1315700	0.87
PF3D7_0606500	PF3D7_1468700	0.913
PF3D7_0307200	PF3D7_0822000	0.989
PF3D7_1211700	PF3D7_1437200	0.997
PF3D7_0512200	PF3D7_0617000	0.723
PF3D7_1463400	PF3D7_1465200	0.784
PF3D7_1433300	PF3D7_1472200	0.829
PF3D7_0413600	PF3D7_1338100	0.999
PF3D7_0808600	PF3D7_1100300	0.701
PF3D7_0716100	PF3D7_0921800	0.849
PF3D7_0402400	PF3D7_1223400	0.743
PF3D7_0917600	PF3D7_1450700	0.728
PF3D7_0309500	PF3D7_1430700	0.852
PF3D7_0905400	PF3D7_0930300	0.95
PF3D7_1015900	PF3D7_1020800	0.752
PF3D7_0703500	PF3D7_1030100	0.728
PF3D7_1362200	PF3D7_1412500	0.885
PF3D7_1107400	PF3D7_1308200	0.784
PF3D7_1306900	PF3D7_1350200	0.774
PF3D7_1331600	PF3D7_1417800	0.781
PF3D7_0705700	PF3D7_1126200	0.999
PF3D7_0908700	PF3D7_1204600	0.718
PF3D7_1010600	PF3D7_1420900	0.943
PF3D7_1011700	PF3D7_1306400	0.896
PF3D7_1022700	PF3D7_1223100	0.754
PF3D7_1211800	PF3D7_1341300	0.874
PF3D7_0927700	PF3D7_1211700	0.842
PF3D7_0402100	PF3D7_1436300	0.873
PF3D7_0511200	PF3D7_1214100	0.818
PF3D7_1351400	PF3D7_1460300	0.999
PF3D7_0519100	PF3D7_1424100	0.999
PF3D7_0705500	PF3D7_1414500	0.768
PF3D7_0903900	PF3D7_1105400	0.999
PF3D7_0422300	PF3D7_0615500	0.806
PF3D7_1323100	PF3D7_1342000	0.999
PF3D7_0507100	PF3D7_1105400	0.999
PF3D7_1103100	PF3D7_1323400	0.998
PF3D7_0208100.2	PF3D7_0904900	0.719
PF3D7_0614500	PF3D7_1357100	0.93
PF3D7_0802300	PF3D7_1008800	0.997
PF3D7_0802300	PF3D7_0814300	0.779
PF3D7_0419400	PF3D7_1449100	0.715
PF3D7_0616000	PF3D7_1033100	0.9
PF3D7_0925800	PF3D7_0931000	0.746
PF3D7_0721600	PF3D7_1007900	0.939
PF3D7_0712000	PF3D7_0937800	0.717
PF3D7_0630900	PF3D7_1445200	0.897
PF3D7_1345100	PF3D7_1435300	0.944
PF3D7_0827000	PF3D7_1434500	0.788
PF3D7_1109400	PF3D7_1332700	0.947
PF3D7_0306800	PF3D7_1008800	0.78
PF3D7_1307600	PF3D7_1332700	0.911
PF3D7_0919900	PF3D7_1224100	0.876
PF3D7_0806800	PF3D7_1306600	0.991
PF3D7_1204300	PF3D7_1461300	0.762
PF3D7_0219600	PF3D7_0504400	0.732
PF3D7_0903200	PF3D7_1211800	0.773
PF3D7_0423500	PF3D7_1222700	0.943
PF3D7_1303500	PF3D7_1473100	0.927
PF3D7_0618300	PF3D7_1028400	0.887
PF3D7_0312300	PF3D7_1033700	0.807
PF3D7_1124900	PF3D7_1323100	0.999
PF3D7_1031200	PF3D7_1251200	0.811
PF3D7_0503400	PF3D7_1361800	0.783
PF3D7_0716100	PF3D7_1445200	0.963
PF3D7_0923200	PF3D7_1412500	0.719
PF3D7_0424700	PF3D7_1247900	0.701
PF3D7_1105400	PF3D7_1226700	0.729
PF3D7_1031200	PF3D7_1344300	0.71
PF3D7_0705700	PF3D7_1143400	0.992
PF3D7_0812400	PF3D7_1347700	0.732
PF3D7_0802100	PF3D7_1325900	0.723
PF3D7_1140400	PF3D7_1141800	0.797
PF3D7_1116100	PF3D7_1431400	0.703
PF3D7_0613400	PF3D7_1414300	0.999
PF3D7_0102200	PF3D7_0409400	0.742
PF3D7_1037000	PF3D7_1368800	0.987
PF3D7_0309200	PF3D7_0515300	0.72
PF3D7_0612600	PF3D7_0803500	0.707
PF3D7_0532100	PF3D7_1130100	0.814
PF3D7_0612200	PF3D7_1036800	0.733
PF3D7_0501600	PF3D7_0919900	0.775
PF3D7_0520000	PF3D7_0821700	0.979
PF3D7_0106700	PF3D7_1461300	0.735
PF3D7_0922500	PF3D7_1443900	0.784
PF3D7_0312300	PF3D7_0807800	0.999
PF3D7_0307200	PF3D7_1003500	0.997
PF3D7_1433400	PF3D7_1448500	0.772
PF3D7_1012600	PF3D7_1331700	0.88
PF3D7_1003500	PF3D7_1450100	0.943
PF3D7_1308300	PF3D7_1309100	0.999
PF3D7_1031800	PF3D7_1232500	0.73
PF3D7_0508700	PF3D7_1468800	0.782
PF3D7_1342900	PF3D7_1343100	0.727
PF3D7_1364800	PF3D7_1365100	0.813
PF3D7_0407800	PF3D7_0507500	0.725
PF3D7_0934800	PF3D7_1410400	0.929
PF3D7_0317600	PF3D7_0516200	0.999
PF3D7_1357800	PF3D7_1433500	0.81
PF3D7_0506100	PF3D7_1308300	0.845
PF3D7_1322000	PF3D7_1355100	0.716
PF3D7_1214200	PF3D7_1355300	0.953
PF3D7_0419600	PF3D7_1358700	0.892
PF3D7_1342000	PF3D7_1429700	0.86
PF3D7_0415500	PF3D7_1461600	0.962
PF3D7_0614500	PF3D7_1408600	0.999
PF3D7_0109000	PF3D7_0802600	0.737
PF3D7_0317600	PF3D7_1341300	0.993
PF3D7_0831000	PF3D7_1301400	0.742
PF3D7_0519400	PF3D7_1451100	0.987
PF3D7_1230600	PF3D7_1307300	0.871
PF3D7_0102200	PF3D7_0814500	0.873
PF3D7_0800300	PF3D7_1240900	0.803
PF3D7_1225100	PF3D7_1461900	0.801
PF3D7_1028300	PF3D7_1423000	0.707
PF3D7_0920900	PF3D7_1461300	0.717
PF3D7_0303000	PF3D7_1466300	0.916
PF3D7_0922500	PF3D7_1037100	0.934
PF3D7_1129500	PF3D7_1361900	0.977
PF3D7_1015100	PF3D7_1238300	0.801
PF3D7_0503300	PF3D7_0903900	0.71
PF3D7_1249300	PF3D7_1431500	0.844
PF3D7_0527900	PF3D7_0622200	0.818
PF3D7_0812220	PF3D7_0923000	0.785
PF3D7_0506100	PF3D7_1107700	0.999
PF3D7_0413700	PF3D7_1235600	0.729
PF3D7_0916700	PF3D7_1224300	0.933
PF3D7_1216900	PF3D7_1434300	0.703
PF3D7_0708800	PF3D7_1136800	0.928
PF3D7_0506900	PF3D7_0905500	0.815
PF3D7_0422400	PF3D7_0721600	0.999
PF3D7_0414000	PF3D7_1141400	0.751
PF3D7_0510100	PF3D7_1343300	0.718
PF3D7_0519400	PF3D7_0607000	0.92
PF3D7_1144900	PF3D7_1346100	0.743
PF3D7_0731100	PF3D7_1478000	0.792
PF3D7_0501400	PF3D7_0830600	0.96
PF3D7_0822800	PF3D7_1027400	0.916
PF3D7_0410700	PF3D7_1321500.2	0.759
PF3D7_1229500	PF3D7_1409800	0.706
PF3D7_1216300	PF3D7_1447000	0.914
PF3D7_0816000	PF3D7_1352200	0.763
PF3D7_1230900	PF3D7_1319300	0.717
PF3D7_0801500	PF3D7_1466700	0.725
PF3D7_0923900	PF3D7_0925800	0.799
PF3D7_0934800	PF3D7_1356300	0.762
PF3D7_0501800	PF3D7_1239200	0.851
PF3D7_0319600	PF3D7_1130200	0.832
PF3D7_1003500	PF3D7_1224300	0.911
PF3D7_0624600	PF3D7_1346400	0.714
PF3D7_0918600	PF3D7_1224500	0.917
PF3D7_0108500	PF3D7_0511500	0.949
PF3D7_0219700	PF3D7_1001900	0.759
PF3D7_1301700	PF3D7_1372200	0.861
PF3D7_1142600	PF3D7_1451100	0.96
PF3D7_0923000	PF3D7_1137500	0.876
PF3D7_0503400	PF3D7_1110700	0.957
PF3D7_0517400	PF3D7_1322100	0.964
PF3D7_0506100	PF3D7_1109900	0.936
PF3D7_0717500	PF3D7_1022700	0.731
PF3D7_1406800	PF3D7_1471400	0.745
PF3D7_0621800	PF3D7_1105400	0.761
PF3D7_0821300	PF3D7_1366500	0.958
PF3D7_0802600	PF3D7_1031200	0.876
PF3D7_0818900	PF3D7_1201100	0.86
PF3D7_0320900	PF3D7_0807000	0.907
PF3D7_0716100	PF3D7_1224400	0.917
PF3D7_0424500	PF3D7_1401400	0.781
PF3D7_0319300	PF3D7_1011700	0.806
PF3D7_0807800	PF3D7_1117100	0.992
PF3D7_1115800	PF3D7_1401100	0.803
PF3D7_0813900	PF3D7_1233000	0.788
PF3D7_0925200	PF3D7_1251500	0.853
PF3D7_1013100	PF3D7_1407100	0.964
PF3D7_1342600	PF3D7_1361800	0.847
PF3D7_0919100	PF3D7_1125400	0.754
PF3D7_0518300	PF3D7_0613700	0.954
PF3D7_0511200	PF3D7_1224100	0.749
PF3D7_1308800	PF3D7_1319400	0.757
PF3D7_1012600	PF3D7_1435300	0.789
PF3D7_0412100	PF3D7_0517000	0.974
PF3D7_0602100	PF3D7_1307300	0.804
PF3D7_0506900	PF3D7_1140400	0.723
PF3D7_0705700	PF3D7_1351400	0.999
PF3D7_0603700	PF3D7_1311500	0.721
PF3D7_0502400	PF3D7_1404800	0.872
PF3D7_0109000	PF3D7_0515700	0.787
PF3D7_1204300	PF3D7_1412600	0.998
PF3D7_1347700	PF3D7_1401800	0.908
PF3D7_1019400	PF3D7_1312900	0.91
PF3D7_0419800	PF3D7_1130200	0.735
PF3D7_0305600	PF3D7_0929400	0.748
PF3D7_0306800	PF3D7_1408600	0.707
PF3D7_0109800	PF3D7_1034900	0.846
PF3D7_0318200	PF3D7_1132200	0.752
PF3D7_1405800	PF3D7_1469300	0.949
PF3D7_1209300	PF3D7_1221000	0.714
PF3D7_0725400	PF3D7_1028700	0.859
PF3D7_1217200	PF3D7_1428300	0.78
PF3D7_0106700	PF3D7_0722600	0.997
PF3D7_0610800	PF3D7_0626800	0.945
PF3D7_0421300	PF3D7_1100200	0.873
PF3D7_0422400	PF3D7_0705700	0.999
PF3D7_0705700	PF3D7_1144000	0.999
PF3D7_1232500	PF3D7_1430200	0.793
PF3D7_0305600	PF3D7_0820700	0.77
PF3D7_0528100	PF3D7_1119500	0.911
PF3D7_0803800	PF3D7_1328100	0.999
PF3D7_1361800	PF3D7_1455300	0.748
PF3D7_0611700	PF3D7_1142600	0.999
PF3D7_0619900	PF3D7_1030100	0.778
PF3D7_1136600	PF3D7_1227800	0.755
PF3D7_1041200	PF3D7_1200400	0.709
PF3D7_0306900	PF3D7_0517000	0.998
PF3D7_1034900	PF3D7_1204300	0.831
PF3D7_1145400	PF3D7_1245100	0.82
PF3D7_0405400	PF3D7_1461600	0.994
PF3D7_0821300	PF3D7_1419100	0.844
PF3D7_0317600	PF3D7_0516900	0.999
PF3D7_0921900	PF3D7_1014700	0.852
PF3D7_1344200	PF3D7_1406600	0.984
PF3D7_0622800	PF3D7_1034900	0.912
PF3D7_0307600	PF3D7_0709100	0.811
PF3D7_1032400	PF3D7_1141600	0.865
PF3D7_0527900	PF3D7_1013100	0.814
PF3D7_1421200	PF3D7_1424100	0.999
PF3D7_0409400	PF3D7_0921200	0.73
PF3D7_1319300	PF3D7_1429500	0.719
PF3D7_1020800	PF3D7_1433500	0.765
PF3D7_0815600	PF3D7_1126200	0.954
PF3D7_0705700	PF3D7_1134700	0.803
PF3D7_0922500	PF3D7_1106300	0.765
PF3D7_1027800	PF3D7_1308300	0.997
PF3D7_0932200	PF3D7_1409400	0.881
PF3D7_1129400	PF3D7_1323900	0.782
PF3D7_0403700	PF3D7_1439100	0.845
PF3D7_1029600	PF3D7_1428300	0.81
PF3D7_1329000	PF3D7_1367600	0.804
PF3D7_0102900	PF3D7_0807900	0.845
PF3D7_0828200	PF3D7_1336900	0.934
PF3D7_0810300	PF3D7_0919900	0.764
PF3D7_1408200	PF3D7_1466400	0.751
PF3D7_1317100	PF3D7_1361900	0.999
PF3D7_0212300	PF3D7_0614500	0.947
PF3D7_0219200	PF3D7_1123900	0.754
PF3D7_1124900	PF3D7_1431000	0.952
PF3D7_1203000	PF3D7_1433500	0.814
PF3D7_1026800	PF3D7_1453700	0.747
PF3D7_0511000	PF3D7_1308300	0.703
PF3D7_1124800	PF3D7_1309500	0.701
PF3D7_1358100	PF3D7_1445900	0.762
PF3D7_0719700	PF3D7_1144000	0.999
PF3D7_0828500	PF3D7_1367500	0.862
PF3D7_0418700	PF3D7_0818400	0.846
PF3D7_0113300	PF3D7_1427100	0.854
PF3D7_0100200	PF3D7_0800300	0.751
PF3D7_0922400	PF3D7_1134700	0.717
PF3D7_0506100	PF3D7_1415800	0.779
PF3D7_0306900	PF3D7_1249900	0.748
PF3D7_1228300	PF3D7_1239200	0.786
PF3D7_0102700	PF3D7_1149200	0.763
PF3D7_0715200	PF3D7_0802100	0.791
PF3D7_0303300	PF3D7_1126800	0.9
PF3D7_1105400	PF3D7_1245400	0.879
PF3D7_0723400	PF3D7_0803100	0.752
PF3D7_0417200	PF3D7_0903700	0.785
PF3D7_1323400	PF3D7_1429700	0.988
PF3D7_0414700	PF3D7_1206200	0.875
PF3D7_1246100	PF3D7_1440300	0.993
PF3D7_0205900	PF3D7_1414000	0.991
PF3D7_0100400	PF3D7_1100300	0.76
PF3D7_1234800	PF3D7_1309300	0.746
PF3D7_0505800	PF3D7_0915100	0.999
PF3D7_0509400	PF3D7_0729400	0.802
PF3D7_0213100	PF3D7_0708800	0.959
PF3D7_1119300	PF3D7_1367100	0.974
PF3D7_1001600	PF3D7_1448500	0.768
PF3D7_0317200	PF3D7_0515700	0.742
PF3D7_0705700	PF3D7_1414300	0.999
PF3D7_0710900	PF3D7_1137500	0.875
PF3D7_1103800	PF3D7_1106300	0.815
PF3D7_1421200	PF3D7_1460300	0.999
PF3D7_0821700	PF3D7_1426200	0.717
PF3D7_0206600	PF3D7_1203500	0.756
PF3D7_1317800	PF3D7_1338300	0.887
PF3D7_0308500	PF3D7_1434300	0.951
PF3D7_0210600	PF3D7_0817700	0.835
PF3D7_0324900	PF3D7_1240300	0.748
PF3D7_1109400	PF3D7_1143300	0.743
PF3D7_0209600	PF3D7_0704300	0.718
PF3D7_0615500	PF3D7_1406600	0.719
PF3D7_0719700	PF3D7_1027800	0.99
PF3D7_0107800	PF3D7_0408500	0.95
PF3D7_0408500	PF3D7_1107400	0.942
PF3D7_1037100	PF3D7_1419100	0.9
PF3D7_0903900	PF3D7_1366600	0.911
PF3D7_0219200	PF3D7_1143400	0.971
PF3D7_1341300	PF3D7_1426000	0.999
PF3D7_0934000	PF3D7_1213800	0.82
PF3D7_0215700	PF3D7_1406200	0.926
PF3D7_1312600	PF3D7_1435300	0.914
PF3D7_0206200	PF3D7_0802600	0.803
PF3D7_1230900	PF3D7_1302000	0.877
PF3D7_0313100	PF3D7_1346100	0.714
PF3D7_1019500.2	PF3D7_1343100	0.715
PF3D7_0729300	PF3D7_1022600	0.767
PF3D7_1136800	PF3D7_1433500	0.783
PF3D7_0413600	PF3D7_0807500	0.999
PF3D7_1312900	PF3D7_1353800	0.9
PF3D7_0316800	PF3D7_1428300	0.753
PF3D7_0305000	PF3D7_1441200	0.764
PF3D7_1242700	PF3D7_1357000	0.849
PF3D7_1020700	PF3D7_1028400	0.935
PF3D7_0215700	PF3D7_1126800	0.9
PF3D7_0602400	PF3D7_1323400	0.932
PF3D7_1317100	PF3D7_1411400	0.865
PF3D7_0509400	PF3D7_1367700	0.765
PF3D7_0320900	PF3D7_1008000	0.851
PF3D7_0110400	PF3D7_1331100	0.907
PF3D7_0505800	PF3D7_0925700	0.764
PF3D7_1011400	PF3D7_1353900	0.996
PF3D7_0929400	PF3D7_1322000	0.704
PF3D7_0424000	PF3D7_1201000	0.824
PF3D7_0312800	PF3D7_1026800	0.999
PF3D7_0920800	PF3D7_1441200	0.838
PF3D7_0830500	PF3D7_1240100	0.736
PF3D7_0602400	PF3D7_1367600	0.889
PF3D7_0802300	PF3D7_0816000	0.913
PF3D7_1338200	PF3D7_1433600	0.9
PF3D7_0813900	PF3D7_1426100	0.72
PF3D7_0525800	PF3D7_1335100	0.836
PF3D7_0824400	PF3D7_1440800	0.744
PF3D7_0202200	PF3D7_0830500	0.908
PF3D7_0726300	PF3D7_0816800	0.712
PF3D7_0217500	PF3D7_1323700	0.969
PF3D7_1118500	PF3D7_1230600	0.805
PF3D7_0930300	PF3D7_1320700	0.728
PF3D7_0108600	PF3D7_1318800	0.772
PF3D7_0708900	PF3D7_1435000	0.914
PF3D7_0726100	PF3D7_0830500	0.865
PF3D7_1126200	PF3D7_1331300	0.915
PF3D7_1110600	PF3D7_1118200	0.929
PF3D7_0215300	PF3D7_1149200	0.88
PF3D7_1312900	PF3D7_1468700	0.905
PF3D7_0319300	PF3D7_1461300	0.74
PF3D7_0206200	PF3D7_0423500	0.745
PF3D7_0807800	PF3D7_1004300	0.72
PF3D7_0715200	PF3D7_1325900	0.763
PF3D7_0319400	PF3D7_1318400	0.732
PF3D7_1113400	PF3D7_1368100	0.967
PF3D7_0611700	PF3D7_1123400	0.919
PF3D7_0417200	PF3D7_1203000	0.946
PF3D7_1025400	PF3D7_1467900	0.742
PF3D7_0710600	PF3D7_1005500	0.9
PF3D7_0935900	PF3D7_0936600	0.881
PF3D7_0612200	PF3D7_1019500.2	0.866
PF3D7_0903700	PF3D7_1211800	0.731
PF3D7_0622200	PF3D7_1302700	0.785
PF3D7_0319400	PF3D7_0615500	0.872
PF3D7_0716100	PF3D7_1028300	0.864
PF3D7_0210200	PF3D7_1014300	0.703
PF3D7_0520500	PF3D7_1365400	0.95
PF3D7_1028200	PF3D7_1331300	0.801
PF3D7_0817900	PF3D7_1441400	0.825
PF3D7_0821300	PF3D7_1206600	0.936
PF3D7_1237600	PF3D7_1358100	0.852
PF3D7_0622200	PF3D7_1463400	0.748
PF3D7_0501100.2	PF3D7_0816600	0.889
PF3D7_0211800	PF3D7_1332900	0.821
PF3D7_0618300	PF3D7_1406000	0.926
PF3D7_0920800	PF3D7_1344900	0.736
PF3D7_1130400	PF3D7_1248900	0.999
PF3D7_0203700	PF3D7_0520700	0.726
PF3D7_0502400	PF3D7_1016700	0.847
PF3D7_0812220	PF3D7_1307600	0.785
PF3D7_0419400	PF3D7_0508100	0.896
PF3D7_0811500	PF3D7_0923900	0.803
PF3D7_0819100	PF3D7_1410200	0.713
PF3D7_0814000	PF3D7_1126200	0.999
PF3D7_0307200	PF3D7_1431700	0.999
PF3D7_1230700	PF3D7_1472100	0.776
PF3D7_1010600	PF3D7_1224300	0.93
PF3D7_0218400	PF3D7_1332700	0.85
PF3D7_1416800	PF3D7_1445100	0.89
PF3D7_1317100	PF3D7_1417800	0.999
PF3D7_0611700	PF3D7_1312900	0.9
PF3D7_0907700	PF3D7_0931800	0.944
PF3D7_1137500	PF3D7_1439400	0.732
PF3D7_1125400	PF3D7_1207600	0.715
PF3D7_0517400	PF3D7_1239500	0.972
PF3D7_1216300	PF3D7_1317800	0.919
PF3D7_1124800	PF3D7_1367600	0.999
PF3D7_0708400	PF3D7_1367000	0.824
PF3D7_0422300	PF3D7_1211000	0.844
PF3D7_0521000	PF3D7_0723400	0.726
PF3D7_1307300	PF3D7_1359200	0.909
PF3D7_1017400	PF3D7_1025100	0.718
PF3D7_0209200	PF3D7_0602100	0.803
PF3D7_0306900	PF3D7_1348300	0.959
PF3D7_1012600	PF3D7_1227100	0.73
PF3D7_1329000	PF3D7_1424100	0.849
PF3D7_0510500	PF3D7_0623900	0.722
PF3D7_1104200	PF3D7_1108700	0.873
PF3D7_0701900	PF3D7_1401100	0.868
PF3D7_1323400	PF3D7_1341300	0.999
PF3D7_0113700	PF3D7_0502400	0.766
PF3D7_1435300	PF3D7_1439500	0.813
PF3D7_0517300	PF3D7_1125500	0.944
PF3D7_0205500	PF3D7_1418900	0.912
PF3D7_1127100	PF3D7_1443900	0.91
PF3D7_1230600	PF3D7_1404500	0.978
PF3D7_0302500	PF3D7_1361800	0.897
PF3D7_0317600	PF3D7_1406000	0.912
PF3D7_1408900	PF3D7_1463400	0.744
PF3D7_0319000	PF3D7_0613800	0.854
PF3D7_0522600	PF3D7_0905400	0.899
PF3D7_1006600	PF3D7_1435300	0.944
PF3D7_0706400	PF3D7_1461300	0.987
PF3D7_1001600	PF3D7_1004200	0.718
PF3D7_0707900	PF3D7_1317800	0.959
PF3D7_0318200	PF3D7_0412100	0.777
PF3D7_1125800	PF3D7_1410400	0.715
PF3D7_0731500	PF3D7_1416500	0.743
PF3D7_1351400	PF3D7_1433600	0.9
PF3D7_0707900	PF3D7_1365900	0.971
PF3D7_0725200	PF3D7_1461600	0.722
PF3D7_1251500	PF3D7_1344900	0.806
PF3D7_0532100	PF3D7_1242700	0.85
PF3D7_0507200	PF3D7_1406800	0.788
PF3D7_0218400	PF3D7_1431300	0.851
PF3D7_0312800	PF3D7_0509400	0.768
PF3D7_0925700	PF3D7_1008000	0.841
PF3D7_0516900	PF3D7_0919600	0.91
PF3D7_0303200	PF3D7_0927300	0.731
PF3D7_0206600	PF3D7_1431800	0.9
PF3D7_0307200	PF3D7_1106100	0.854
PF3D7_0308900	PF3D7_0822300	0.95
PF3D7_0519400	PF3D7_1367600	0.759
PF3D7_0306800	PF3D7_0520000	0.801
PF3D7_0312800	PF3D7_1465900	0.999
PF3D7_0507500	PF3D7_1469200	0.78
PF3D7_0415600	PF3D7_0806800	0.712
PF3D7_0607000	PF3D7_0814000	0.96
PF3D7_0524000	PF3D7_0615700	0.749
PF3D7_0218400	PF3D7_1207100	0.719
PF3D7_1224000	PF3D7_1472700	0.847
PF3D7_1224300	PF3D7_1331800	0.914
PF3D7_1365500	PF3D7_1419800.2	0.92
PF3D7_0710900	PF3D7_1330600	0.856
PF3D7_1211800	PF3D7_1342800	0.718
PF3D7_0320300	PF3D7_1351400	0.792
PF3D7_0507100	PF3D7_1323400	0.999
PF3D7_0508700	PF3D7_0619900	0.911
PF3D7_0609700	PF3D7_1025000	0.709
PF3D7_0528800	PF3D7_1317900	0.757
PF3D7_0608900	PF3D7_1243000	0.754
PF3D7_1331800	PF3D7_1342000	0.999
PF3D7_0632500	PF3D7_0713200	0.87
PF3D7_0403900	PF3D7_0407800	0.735
PF3D7_0719600	PF3D7_1204300	0.9
PF3D7_0421300	PF3D7_0711700	0.801
PF3D7_0405000	PF3D7_1230600	0.87
PF3D7_1110600	PF3D7_1143300	0.742
PF3D7_0921800	PF3D7_1217200	0.885
PF3D7_0918900	PF3D7_1311800	0.713
PF3D7_0410300	PF3D7_0520100	0.916
PF3D7_0923000	PF3D7_1424100	0.955
PF3D7_1354500	PF3D7_1431800	0.908
PF3D7_0409200	PF3D7_0814300	0.726
PF3D7_0827000	PF3D7_1423000	0.789
PF3D7_0630900	PF3D7_1227800	0.747
PF3D7_0718500	PF3D7_1416900	0.995
PF3D7_0829200	PF3D7_1014700	0.997
PF3D7_0708400	PF3D7_1108700	0.894
PF3D7_0310400	PF3D7_1228600	0.886
PF3D7_0307200	PF3D7_1417500	0.779
PF3D7_1213900	PF3D7_1326400	0.999
PF3D7_0307200	PF3D7_1144300	0.9
PF3D7_0919600	PF3D7_1027800	0.919
PF3D7_0827000	PF3D7_1020400	0.708
PF3D7_1331800	PF3D7_1465900	0.999
PF3D7_1302500	PF3D7_1449700	0.837
PF3D7_1206600	PF3D7_1251500	0.731
PF3D7_0103600	PF3D7_0310500	0.728
PF3D7_0702000	PF3D7_0830600	0.814
PF3D7_0808600	PF3D7_1240400	0.775
PF3D7_0920500	PF3D7_1251200	0.861
PF3D7_1144000	PF3D7_1451100	0.953
PF3D7_1124900	PF3D7_1424400	0.999
PF3D7_0322900	PF3D7_1105400	0.999
PF3D7_1033700	PF3D7_1209300	0.758
PF3D7_0710600	PF3D7_1302800	0.999
PF3D7_0105800	PF3D7_1343100	0.803
PF3D7_0525800	PF3D7_1035500	0.933
PF3D7_0320500	PF3D7_1453500	0.73
PF3D7_0824600	PF3D7_1211800	0.926
PF3D7_0419300	PF3D7_0816800	0.997
PF3D7_0403800	PF3D7_1332200	0.786
PF3D7_1332800	PF3D7_1424100	0.992
PF3D7_0918800	PF3D7_1012600	0.864
PF3D7_1105400	PF3D7_1212700	0.944
PF3D7_0501800	PF3D7_1224500	0.999
PF3D7_0731300	PF3D7_1033200	0.701
PF3D7_0931800	PF3D7_1328100	0.999
PF3D7_0217500	PF3D7_0934800	0.941
PF3D7_0624600	PF3D7_0704600	0.737
PF3D7_0525800	PF3D7_1017500	0.893
PF3D7_0405400	PF3D7_1350200	0.998
PF3D7_0613400	PF3D7_1123900	0.796
PF3D7_0417200	PF3D7_1211700	0.912
PF3D7_1320800	PF3D7_1450900	0.904
PF3D7_1004400	PF3D7_1224900	0.918
PF3D7_0422700	PF3D7_0903900	0.948
PF3D7_1402100	PF3D7_1417500	0.801
PF3D7_0931100	PF3D7_1428300	0.74
PF3D7_0410700	PF3D7_1357700	0.841
PF3D7_1027800	PF3D7_1433600	0.9
PF3D7_1423000	PF3D7_1448000	0.76
PF3D7_1433500	PF3D7_1474100	0.771
PF3D7_0308600	PF3D7_1030100	0.997
PF3D7_0302600	PF3D7_0813700	0.726
PF3D7_0110400	PF3D7_0708100	0.999
PF3D7_1143300	PF3D7_1245400	0.911
PF3D7_0612100	PF3D7_0815600	0.992
PF3D7_0302900	PF3D7_1107000	0.707
PF3D7_1130400	PF3D7_1328100	0.994
PF3D7_0630500	PF3D7_1466700	0.999
PF3D7_1118500	PF3D7_1342000	0.754
PF3D7_1358800	PF3D7_1428300	0.711
PF3D7_0105800	PF3D7_0319000	0.733
PF3D7_0307500	PF3D7_1417800	0.884
PF3D7_0417200	PF3D7_1020800	0.865
PF3D7_1354300	PF3D7_1417500	0.875
PF3D7_1110700	PF3D7_1357000	0.827
PF3D7_0721300	PF3D7_1020700	0.865
PF3D7_0320700	PF3D7_1317100	0.793
PF3D7_1033600	PF3D7_1248200	0.994
PF3D7_0102900	PF3D7_1416800	0.769
PF3D7_0318200	PF3D7_0909800	0.92
PF3D7_0316800	PF3D7_1317800	0.999
PF3D7_0108000	PF3D7_1353900	0.999
PF3D7_0317600	PF3D7_0719600	0.999
PF3D7_0710900	PF3D7_0923000	0.8
PF3D7_0309600	PF3D7_0312300	0.865
PF3D7_0621200	PF3D7_1115700	0.866
PF3D7_0722600	PF3D7_1307100	0.991
PF3D7_0603300	PF3D7_1012600	0.909
PF3D7_0913900	PF3D7_1015200.3	0.701
PF3D7_0305000	PF3D7_1003500	0.823
PF3D7_0519100	PF3D7_1223900	0.999
PF3D7_0820000	PF3D7_1307600	0.926
PF3D7_0819100	PF3D7_0921800	0.775
PF3D7_0319100	PF3D7_0319300	0.773
PF3D7_1016800	PF3D7_1149600	0.792
PF3D7_0501300	PF3D7_0935600	0.735
PF3D7_1124900	PF3D7_1460700	0.999
PF3D7_0409100	PF3D7_1474500	0.914
PF3D7_1244600	PF3D7_1353600	0.989
PF3D7_0716800	PF3D7_0912800	0.768
PF3D7_0307600	PF3D7_1322000	0.743
PF3D7_0516200	PF3D7_0520000	0.999
PF3D7_1224100	PF3D7_1364100	0.79
PF3D7_1116700	PF3D7_1357800	0.764
PF3D7_0715900	PF3D7_1009500	0.743
PF3D7_0527200	PF3D7_0726500	0.741
PF3D7_0415900	PF3D7_1341300	0.999
PF3D7_0410700	PF3D7_1237600	0.939
PF3D7_0322900	PF3D7_0728000	0.934
PF3D7_1015300	PF3D7_1124900	0.721
PF3D7_0113000	PF3D7_0415900	0.781
PF3D7_1115400	PF3D7_1407900	0.771
PF3D7_1126800	PF3D7_1414800	0.9
PF3D7_0217100	PF3D7_0307600	0.724
PF3D7_0418200	PF3D7_0621300	0.955
PF3D7_0509400	PF3D7_1461200	0.786
PF3D7_1229500	PF3D7_1435300	0.802
PF3D7_1107800	PF3D7_1219000	0.742
PF3D7_0111500	PF3D7_1341900	0.752
PF3D7_0317000	PF3D7_1011400	0.999
PF3D7_1137500	PF3D7_1456000	0.781
PF3D7_0322000	PF3D7_1130100	0.854
PF3D7_0206100	PF3D7_0322500	0.713
PF3D7_0315400	PF3D7_1232000	0.761
PF3D7_0419400	PF3D7_1227600	0.719
PF3D7_0725200	PF3D7_1447000	0.971
PF3D7_0612200	PF3D7_0927300	0.858
PF3D7_0802300	PF3D7_1207100	0.872
PF3D7_0305600	PF3D7_1224100	0.708
PF3D7_0206200	PF3D7_0817700	0.805
PF3D7_1018600	PF3D7_1224900	0.836
PF3D7_0730900	PF3D7_1415300	0.718
PF3D7_1308300	PF3D7_1451100	0.985
PF3D7_1118200	PF3D7_1356700	0.907
PF3D7_1216100	PF3D7_1365100	0.751
PF3D7_0506100	PF3D7_1212700	0.811
PF3D7_0307200	PF3D7_0813900	0.997
PF3D7_0415500	PF3D7_1010200	0.785
PF3D7_0721300	PF3D7_1226700	0.792
PF3D7_1033400	PF3D7_1469300	0.744
PF3D7_0308600	PF3D7_0528700	0.758
PF3D7_1037600	PF3D7_1353500	0.993
PF3D7_0217100	PF3D7_1211700	0.716
PF3D7_0727300	PF3D7_1433500	0.713
PF3D7_0307100	PF3D7_0716800	0.939
PF3D7_0410300	PF3D7_0926100	0.755
PF3D7_0505400	PF3D7_0625300	0.809
PF3D7_0532300	PF3D7_1445900	0.706
PF3D7_1428300	PF3D7_1469300	0.897
PF3D7_1003500	PF3D7_1027800	0.999
PF3D7_1234300	PF3D7_1463300	0.984
PF3D7_1224300	PF3D7_1358800	0.94
PF3D7_0807500	PF3D7_1338100	0.999
PF3D7_1317100	PF3D7_1361700	0.708
PF3D7_0915400	PF3D7_1132800	0.75
PF3D7_0611700	PF3D7_1406000	0.904
PF3D7_1224400	PF3D7_1448000	0.998
PF3D7_0821700	PF3D7_1126200	0.968
PF3D7_1134700	PF3D7_1428300	0.784
PF3D7_0220200	PF3D7_1103100	0.751
PF3D7_0219600	PF3D7_0412000	0.784
PF3D7_0708400	PF3D7_1134000	0.97
PF3D7_0503800	PF3D7_1130100	0.999
PF3D7_0318200	PF3D7_0415300	0.996
PF3D7_1015300	PF3D7_1410200	0.731
PF3D7_0612200	PF3D7_0723800	0.87
PF3D7_0516200	PF3D7_0710600	0.998
PF3D7_0306900	PF3D7_1338200	0.999
PF3D7_1037100	PF3D7_1438700	0.915
PF3D7_0626800	PF3D7_1015800	0.956
PF3D7_1350200	PF3D7_1364800	0.951
PF3D7_1211800	PF3D7_1464700	0.752
PF3D7_1224000	PF3D7_1235600	0.782
PF3D7_0725400	PF3D7_1133400	0.897
PF3D7_0501400	PF3D7_1115800	0.852
PF3D7_0922400	PF3D7_1015600	0.805
PF3D7_0319400	PF3D7_0820700	0.718
PF3D7_1103100	PF3D7_1121600	0.709
PF3D7_0217100	PF3D7_1435300	0.84
PF3D7_1357700	PF3D7_1445200	0.916
PF3D7_1005100	PF3D7_1013100	0.969
PF3D7_0206000	PF3D7_1361900	0.971
PF3D7_0730900	PF3D7_1039000	0.824
PF3D7_0504400	PF3D7_1129400	0.785
PF3D7_1367600	PF3D7_1441200	0.986
PF3D7_0414700	PF3D7_1005100	0.721
PF3D7_1012600	PF3D7_1020800	0.74
PF3D7_0215700	PF3D7_1351400	0.882
PF3D7_0816000	PF3D7_1028300	0.887
PF3D7_0607300	PF3D7_1406900	0.726
PF3D7_0307200	PF3D7_0506100	0.97
PF3D7_0507600	PF3D7_0931800	0.955
PF3D7_0320300	PF3D7_1323100	0.828
PF3D7_0213100	PF3D7_1118200	0.959
PF3D7_0215700	PF3D7_0811900	0.71
PF3D7_0320900	PF3D7_1106000	0.919
PF3D7_0922400	PF3D7_1224000	0.891
PF3D7_1008000	PF3D7_1222300	0.713
PF3D7_0726300	PF3D7_1117800	0.968
PF3D7_1004000	PF3D7_1366600	0.942
PF3D7_0705700	PF3D7_1233000	0.926
PF3D7_0923000	PF3D7_1441200	0.832
PF3D7_0418700	PF3D7_1352200	0.744
PF3D7_0410700	PF3D7_1405800	0.999
PF3D7_0802400	PF3D7_1119200	0.743
PF3D7_0312300	PF3D7_0818900	0.9
PF3D7_1105400	PF3D7_1426000	0.999
PF3D7_1358800	PF3D7_1367600	0.892
PF3D7_0821700	PF3D7_1460300	0.999
PF3D7_0415500	PF3D7_1312900	0.9
PF3D7_0930300	PF3D7_1310700	0.719
PF3D7_0612200	PF3D7_1321500.2	0.83
PF3D7_0217800	PF3D7_0815600	0.931
PF3D7_0803800	PF3D7_1203000	0.9
PF3D7_0707700	PF3D7_1344200	0.726
PF3D7_1143400	PF3D7_1342000	0.979
PF3D7_0410700	PF3D7_1112100	0.774
PF3D7_0730800.2	PF3D7_1367400	0.722
PF3D7_1120000	PF3D7_1426100	0.741
PF3D7_0219200	PF3D7_1109900	0.999
PF3D7_1117100	PF3D7_1355100	0.759
PF3D7_0100300	PF3D7_1240300	0.893
PF3D7_0918600	PF3D7_1347100	0.982
PF3D7_0320900	PF3D7_1118600	0.958
PF3D7_1015900	PF3D7_1358800	0.731
PF3D7_0802600	PF3D7_1321500.2	0.898
PF3D7_0807800	PF3D7_1412700	0.746
PF3D7_0202000	PF3D7_0708400	0.734
PF3D7_0408500	PF3D7_1013600	0.718
PF3D7_1142600	PF3D7_1429700	0.868
PF3D7_0219200	PF3D7_0719700	0.999
PF3D7_0605000	PF3D7_1433500	0.788
PF3D7_0618300	PF3D7_1357100	0.929
PF3D7_0630500	PF3D7_1226700	0.844
PF3D7_1317800	PF3D7_1453700	0.724
PF3D7_0607300	PF3D7_1323000	0.797
PF3D7_0707900	PF3D7_1242700	0.957
PF3D7_0216400	PF3D7_0724600	0.747
PF3D7_1106300	PF3D7_1209200	0.893
PF3D7_0519300	PF3D7_1430900	0.987
PF3D7_0414900	PF3D7_1455300	0.963
PF3D7_1016700	PF3D7_1105600	0.783
PF3D7_0309200	PF3D7_0803700	0.755
PF3D7_0516900	PF3D7_1433600	0.9
PF3D7_0608800	PF3D7_1149000	0.705
PF3D7_1451100	PF3D7_1474100	0.741
PF3D7_0700800	PF3D7_1041200	0.811
PF3D7_0208200	PF3D7_1342000	0.709
PF3D7_0317600	PF3D7_0715000	0.786
PF3D7_1419100	PF3D7_1466700	0.964
PF3D7_1027400	PF3D7_1421400	0.888
PF3D7_1124500	PF3D7_1135100	0.866
PF3D7_1117800	PF3D7_1443900	0.765
PF3D7_0307200	PF3D7_1474100	0.867
PF3D7_0729300	PF3D7_0827000	0.858
PF3D7_0409400	PF3D7_0708400	0.918
PF3D7_0509400	PF3D7_1329000	0.832
PF3D7_0929400	PF3D7_1232500	0.893
PF3D7_1412600	PF3D7_1429500	0.716
PF3D7_1036800	PF3D7_1306200	0.768
PF3D7_1424100	PF3D7_1426100	0.718
PF3D7_0307200	PF3D7_0507100	0.999
PF3D7_1008700	PF3D7_1337100	0.758
PF3D7_0613400	PF3D7_1317800	0.999
PF3D7_0519400	PF3D7_0826700	0.996
PF3D7_0501300	PF3D7_0731100	0.796
PF3D7_0925400	PF3D7_1357800	0.832
PF3D7_0513300	PF3D7_1130000	0.788
PF3D7_1242700	PF3D7_1406000	0.921
PF3D7_1222300	PF3D7_1431500	0.774
PF3D7_0721600	PF3D7_1223900	0.98
PF3D7_0715600	PF3D7_1366500	0.738
PF3D7_0417200	PF3D7_1331700	0.751
PF3D7_0506100	PF3D7_0719700	0.705
PF3D7_0730800.2	PF3D7_1407900	0.863
PF3D7_1124500	PF3D7_1416500	0.741
PF3D7_1126200	PF3D7_1408600	0.999
PF3D7_0517000	PF3D7_1451100	0.995
PF3D7_1346100	PF3D7_1366600	0.795
PF3D7_0803800	PF3D7_1306400	0.998
PF3D7_1001400	PF3D7_1016700	0.827
PF3D7_0218500	PF3D7_1316500	0.707
PF3D7_1003600	PF3D7_1223100	0.812
PF3D7_0812600	PF3D7_1011700	0.841
PF3D7_0507300	PF3D7_1301600	0.726
PF3D7_1024800	PF3D7_1453700	0.712
PF3D7_1418000	PF3D7_1422500	0.92
PF3D7_1366600	PF3D7_1424100	0.946
PF3D7_0811900	PF3D7_1217200	0.934
PF3D7_0733000	PF3D7_1040300	0.712
PF3D7_0405400	PF3D7_0508700	0.817
PF3D7_0813900	PF3D7_0827500	0.834
PF3D7_0223400	PF3D7_1353000	0.747
PF3D7_0506100	PF3D7_1144000	0.81
PF3D7_0727400	PF3D7_0916700	0.9
PF3D7_1224400	PF3D7_1407100	0.859
PF3D7_0923000	PF3D7_1421400	0.775
PF3D7_0710900	PF3D7_1245400	0.973
PF3D7_0612700	PF3D7_1223100	0.868
PF3D7_1123400	PF3D7_1348300	0.717
PF3D7_0521500	PF3D7_1227900	0.95
PF3D7_0917900	PF3D7_1433500	0.825
PF3D7_1226700	PF3D7_1461200	0.97
PF3D7_1332700	PF3D7_1364800	0.927
PF3D7_0205500	PF3D7_0821300	0.9
PF3D7_0605000	PF3D7_1341300	0.862
PF3D7_0911700	PF3D7_1012600	0.792
PF3D7_0614000	PF3D7_0817000	0.702
PF3D7_0822300	PF3D7_1004400	0.946
PF3D7_1218600	PF3D7_1435300	0.757
PF3D7_0320900	PF3D7_1246200	0.769
PF3D7_1035100	PF3D7_1235200	0.896
PF3D7_0414000	PF3D7_1442000	0.794
PF3D7_1208900	PF3D7_1433400	0.755
PF3D7_0812220	PF3D7_1143300	0.792
PF3D7_1245400	PF3D7_1331800	0.995
PF3D7_1130200	PF3D7_1405800	0.738
PF3D7_0312800	PF3D7_1342000	0.999
PF3D7_1323100	PF3D7_1348300	0.96
PF3D7_0317200	PF3D7_1116100	0.708
PF3D7_0422700	PF3D7_1465900	0.938
PF3D7_1359200	PF3D7_1418900	0.9
PF3D7_1415800	PF3D7_1471000	0.854
PF3D7_1201200	PF3D7_1252900	0.759
PF3D7_0212300	PF3D7_1447000	0.983
PF3D7_1106100	PF3D7_1424400	0.856
PF3D7_0102900	PF3D7_1350100	0.85
PF3D7_1028300	PF3D7_1346500	0.732
PF3D7_0501800	PF3D7_1021900	0.734
PF3D7_0421100	PF3D7_1200400	0.722
PF3D7_1247900	PF3D7_1448000	0.817
PF3D7_1251200	PF3D7_1361400	0.957
PF3D7_0920800	PF3D7_1020800	0.777
PF3D7_0919600	PF3D7_1242700	0.9
PF3D7_1342000	PF3D7_1408600	0.999
PF3D7_0520600	PF3D7_1410200	0.972
PF3D7_1450100	PF3D7_1474100	0.798
PF3D7_0823300	PF3D7_1322100	0.764
PF3D7_1132700	PF3D7_1342000	0.841
PF3D7_0808600	PF3D7_1240300	0.787
PF3D7_0415900	PF3D7_1323100	0.999
PF3D7_1239500	PF3D7_1433500	0.867
PF3D7_1104000	PF3D7_1126000	0.875
PF3D7_0402000	PF3D7_1001000	0.751
PF3D7_0720100	PF3D7_1332700	0.951
PF3D7_0212600	PF3D7_1025400	0.751
PF3D7_1015800	PF3D7_1211300	0.948
PF3D7_0322000	PF3D7_1126200	0.785
PF3D7_1125500	PF3D7_1367100	0.989
PF3D7_0109000	PF3D7_1133400	0.892
PF3D7_0308600	PF3D7_0623600	0.713
PF3D7_0521300	PF3D7_0521700	0.72
PF3D7_0715500	PF3D7_1120800	0.767
PF3D7_1014400	PF3D7_1037600	0.938
PF3D7_1246200	PF3D7_1310700	0.719
PF3D7_1137500	PF3D7_1243600	0.75
PF3D7_0501100.2	PF3D7_1001400	0.736
PF3D7_0606900	PF3D7_0708300	0.959
PF3D7_0217500	PF3D7_1471400	0.717
PF3D7_0217800	PF3D7_0415500	0.917
PF3D7_0724600	PF3D7_1433800	0.756
PF3D7_0517400	PF3D7_1342400	0.752
PF3D7_1025400	PF3D7_1035300	0.798
PF3D7_0306900	PF3D7_1433600	0.9
PF3D7_0527200	PF3D7_1008400	0.995
PF3D7_1103800	PF3D7_1459700	0.706
PF3D7_0405400	PF3D7_1220100	0.981
PF3D7_0214200	PF3D7_1472700	0.868
PF3D7_0813300	PF3D7_1420700	0.763
PF3D7_0822000	PF3D7_1358800	0.852
PF3D7_0302000	PF3D7_0415500	0.863
PF3D7_0415900	PF3D7_1028400	0.771
PF3D7_1306200	PF3D7_1439400	0.719
PF3D7_1112100	PF3D7_1228600	0.789
PF3D7_0905400	PF3D7_1410400	0.969
PF3D7_0213900	PF3D7_1367400	0.778
PF3D7_0532400	PF3D7_1149000	0.755
PF3D7_1213800	PF3D7_1331700	0.995
PF3D7_0309200	PF3D7_1211000	0.78
PF3D7_0319400	PF3D7_1306200	0.759
PF3D7_1119300	PF3D7_1468800	0.998
PF3D7_1212700	PF3D7_1465900	0.946
PF3D7_0517300	PF3D7_1118500	0.753
PF3D7_1308200	PF3D7_1437200	0.781
PF3D7_1115800	PF3D7_1240100	0.781
PF3D7_1243700	PF3D7_1356300	0.707
PF3D7_1338300	PF3D7_1420400	0.818
PF3D7_0607000	PF3D7_0705700	0.951
PF3D7_1123400	PF3D7_1234200	0.975
PF3D7_0420100	PF3D7_0825500	0.701
PF3D7_0318200	PF3D7_1104200	0.98
PF3D7_0719600	PF3D7_0725200	0.917
PF3D7_0108600	PF3D7_0917900	0.795
PF3D7_0319300	PF3D7_0605800	0.762
PF3D7_0721100	PF3D7_1419800.2	0.713
PF3D7_0930300	PF3D7_1031200	0.889
PF3D7_1130200	PF3D7_1424100	0.999
PF3D7_0210000	PF3D7_0919600	0.995
PF3D7_0511000	PF3D7_1424100	0.973
PF3D7_1033400	PF3D7_1357900	0.763
PF3D7_1028400	PF3D7_1317900	0.833
PF3D7_0415600	PF3D7_1302700	0.907
PF3D7_0322000	PF3D7_0513300	0.888
PF3D7_0915400	PF3D7_1408100	0.726
PF3D7_1032500	PF3D7_1344200	0.766
PF3D7_1106300	PF3D7_1308900	0.922
PF3D7_0729300	PF3D7_1465300	0.71
PF3D7_1030100	PF3D7_1417500	0.797
PF3D7_1354300	PF3D7_1404500	0.913
PF3D7_0727200	PF3D7_1365400	0.994
PF3D7_1110600	PF3D7_1424100	0.98
PF3D7_0936600	PF3D7_0936800	0.723
PF3D7_1348300	PF3D7_1410900	0.953
PF3D7_0318200	PF3D7_1012600	0.876
PF3D7_1016400	PF3D7_1132200	0.779
PF3D7_0824900	PF3D7_1330800	0.718
PF3D7_1108400	PF3D7_1346300	0.724
PF3D7_1003500	PF3D7_1408600	0.999
PF3D7_1133400	PF3D7_1243700	0.933
PF3D7_0703900	PF3D7_1140700	0.701
PF3D7_1143300	PF3D7_1206600	0.999
PF3D7_1246200	PF3D7_1357100	0.827
PF3D7_1227800	PF3D7_1332700	0.816
PF3D7_1038100	PF3D7_1144900	0.78
PF3D7_0217100	PF3D7_0305600	0.805
PF3D7_1228300	PF3D7_1319400	0.705
PF3D7_1030100	PF3D7_1238300	0.991
PF3D7_0722600	PF3D7_1226700	0.99
PF3D7_1138500	PF3D7_1458000	0.711
PF3D7_1451900	PF3D7_1466700	0.748
PF3D7_0208200	PF3D7_1124800	0.933
PF3D7_1134700	PF3D7_1367600	0.901
PF3D7_0405200	PF3D7_0802600	0.735
PF3D7_0810500	PF3D7_1135100	0.929
PF3D7_1361400	PF3D7_1412500	0.944
PF3D7_0625300	PF3D7_1433500	0.769
PF3D7_1115600	PF3D7_1144900	0.772
PF3D7_0405400	PF3D7_1318800	0.843
PF3D7_0902300	PF3D7_1016800	0.718
PF3D7_1309100	PF3D7_1460300	0.999
PF3D7_0931100	PF3D7_1358100	0.777
PF3D7_1021500	PF3D7_1207100	0.785
PF3D7_0211900	PF3D7_0320700	0.722
PF3D7_0509100	PF3D7_0525200	0.825
PF3D7_0504400	PF3D7_1421400	0.917
PF3D7_1227600	PF3D7_1228700	0.714
PF3D7_1323400	PF3D7_1341200	0.999
PF3D7_0608700	PF3D7_1130200	0.75
PF3D7_0202500	PF3D7_1301700	0.837
PF3D7_0803800	PF3D7_1402300	0.999
PF3D7_0821700	PF3D7_1204300	0.798
PF3D7_0106000	PF3D7_0522600	0.813
PF3D7_0405400	PF3D7_1248200	0.98
PF3D7_1024800	PF3D7_1434300	0.711
PF3D7_0409400	PF3D7_1434500	0.755
PF3D7_1129400	PF3D7_1226700	0.926
PF3D7_0317600	PF3D7_0419800	0.778
PF3D7_0706400	PF3D7_1450100	0.902
PF3D7_0306900	PF3D7_0322000	0.759
PF3D7_0409200	PF3D7_1020700	0.968
PF3D7_0818800	PF3D7_1354300	0.758
PF3D7_0605300	PF3D7_0803700	0.776
PF3D7_1034400	PF3D7_1330600	0.891
PF3D7_1123900	PF3D7_1302600	0.804
PF3D7_0422300	PF3D7_1110700	0.818
PF3D7_1027100	PF3D7_1471000	0.96
PF3D7_0307200	PF3D7_1433500	0.774
PF3D7_0303200	PF3D7_0410800	0.782
PF3D7_0408500	PF3D7_1241700	0.844
PF3D7_0934800	PF3D7_1471400	0.74
PF3D7_0213100	PF3D7_0308200	0.755
PF3D7_0513800	PF3D7_1008700	0.916
PF3D7_0804500	PF3D7_1228800	0.718
PF3D7_0320300	PF3D7_1357800	0.999
PF3D7_0510500	PF3D7_1239500	0.994
PF3D7_1027300	PF3D7_1410400	0.778
PF3D7_1324900	PF3D7_1462800	0.969
PF3D7_0102200	PF3D7_1352900	0.906
PF3D7_0102500	PF3D7_1031200	0.743
PF3D7_1035000	PF3D7_1237600	0.703
PF3D7_1311500	PF3D7_1474800	0.999
PF3D7_0922700	PF3D7_1030100	0.997
PF3D7_1020700	PF3D7_1111000	0.709
PF3D7_1308300	PF3D7_1317800	0.999
PF3D7_1453800	PF3D7_1462800	0.873
PF3D7_1110100	PF3D7_1349500	0.705
PF3D7_1325900	PF3D7_1343100	0.702
PF3D7_0307100	PF3D7_1366500	0.793
PF3D7_0913800	PF3D7_1028700	0.822
PF3D7_1106300	PF3D7_1327700	0.796
PF3D7_0935600	PF3D7_0935900	0.931
PF3D7_1231600	PF3D7_1364800	0.91
PF3D7_0425800	PF3D7_1100100	0.807
PF3D7_0524000	PF3D7_1117700	0.971
PF3D7_0903900	PF3D7_1026800	0.999
PF3D7_0212900	PF3D7_0506900	0.743
PF3D7_0812220	PF3D7_1124700	0.778
PF3D7_0919600	PF3D7_1246700	0.718
PF3D7_1119500	PF3D7_1144900	0.761
PF3D7_1361900	PF3D7_1465900	0.754
PF3D7_1126800	PF3D7_1231500	0.9
PF3D7_0532100	PF3D7_1434300	0.745
PF3D7_0612900	PF3D7_1357700	0.93
PF3D7_0627800	PF3D7_1240000	0.721
PF3D7_1215300	PF3D7_1406600	0.851
PF3D7_1436000	PF3D7_1477500	0.709
PF3D7_0420100	PF3D7_1415800	0.92
PF3D7_0219900	PF3D7_0625400	0.709
PF3D7_0513800	PF3D7_0602500	0.964
PF3D7_1011700	PF3D7_1343400	0.756
PF3D7_1342000	PF3D7_1450100	0.911
PF3D7_0725000	PF3D7_1017000	0.819
PF3D7_0914800	PF3D7_1364100	0.72
PF3D7_0725200	PF3D7_1341200	0.91
PF3D7_0517700	PF3D7_1347500	0.803
PF3D7_0305000	PF3D7_0605000	0.71
PF3D7_0212300	PF3D7_0422400	0.933
PF3D7_1021500	PF3D7_1358100	0.923
PF3D7_0418200	PF3D7_1004900	0.95
PF3D7_0105900	PF3D7_1331600	0.703
PF3D7_0508500	PF3D7_1406800	0.734
PF3D7_1313000	PF3D7_1345500	0.866
PF3D7_0625600	PF3D7_0923900	0.806
PF3D7_1301400	PF3D7_1412500	0.734
PF3D7_0419800	PF3D7_1447000	0.803
PF3D7_0622200	PF3D7_0917600	0.798
PF3D7_0709100	PF3D7_1117100	0.785
PF3D7_0418700	PF3D7_0420100	0.994
PF3D7_1242700	PF3D7_1338200	0.999
PF3D7_0520000	PF3D7_1365900	0.993
PF3D7_0602100	PF3D7_0821300	0.91
PF3D7_0211800	PF3D7_1358800	0.82
PF3D7_0901700	PF3D7_1001200	0.748
PF3D7_0909400	PF3D7_1124400	0.893
PF3D7_0111500	PF3D7_0206700	0.794
PF3D7_0807800	PF3D7_1353900	0.999
PF3D7_0414000	PF3D7_0605800	0.931
PF3D7_0522600	PF3D7_0817700	0.831
PF3D7_0504900	PF3D7_0932200	0.857
PF3D7_0217100	PF3D7_0319400	0.764
PF3D7_0708400	PF3D7_1037600	0.905
PF3D7_0422700	PF3D7_1109900	0.929
PF3D7_0412100	PF3D7_0719700	0.818
PF3D7_0312300	PF3D7_0807500	0.999
PF3D7_0219200	PF3D7_1130200	0.982
PF3D7_1211700	PF3D7_1441400	0.725
PF3D7_1134700	PF3D7_1435300	0.765
PF3D7_0113700	PF3D7_1318800	0.785
PF3D7_0422400	PF3D7_1351400	0.999
PF3D7_0501000	PF3D7_0721600	0.702
PF3D7_0103800	PF3D7_1462800	0.787
PF3D7_1124900	PF3D7_1309100	0.999
PF3D7_0415300	PF3D7_0920800	0.756
PF3D7_0602400	PF3D7_1132700	0.977
PF3D7_0830500	PF3D7_1138700	0.758
PF3D7_1213700	PF3D7_1431800	0.9
PF3D7_1234300	PF3D7_1356900	0.775
PF3D7_0212300	PF3D7_1302800	0.936
PF3D7_0519200	PF3D7_1027800	0.702
PF3D7_0316800	PF3D7_1123400	0.942
PF3D7_1028400	PF3D7_1415800	0.97
PF3D7_0518500	PF3D7_1364800	0.916
PF3D7_0614000	PF3D7_1237000	0.702
PF3D7_0520000	PF3D7_1330600	0.915
PF3D7_1012600	PF3D7_1323000	0.828
PF3D7_0420700	PF3D7_0425800	0.745
PF3D7_1022600	PF3D7_1359000	0.72
PF3D7_0820000	PF3D7_1304900	0.922
PF3D7_0301800	PF3D7_1115800	0.82
PF3D7_1037000	PF3D7_1361900	0.978
PF3D7_0703900	PF3D7_1225500	0.769
PF3D7_0934800	PF3D7_1406800	0.861
PF3D7_0220100	PF3D7_1221900	0.847
PF3D7_1332900	PF3D7_1443900	0.764
PF3D7_1237600	PF3D7_1404500	0.978
PF3D7_0926100	PF3D7_1358200	0.723
PF3D7_0532300	PF3D7_1372200	0.759
PF3D7_0422500	PF3D7_0826100	0.711
PF3D7_0811000	PF3D7_1225800	0.782
PF3D7_0320300	PF3D7_1414300	0.726
PF3D7_0215700	PF3D7_0923000	0.999
PF3D7_0630500	PF3D7_1130200	0.751
PF3D7_1359400	PF3D7_1424100	0.709
PF3D7_1228700	PF3D7_1239200	0.722
PF3D7_0918300	PF3D7_1441200	0.778
PF3D7_1143400	PF3D7_1206700	0.999
PF3D7_0318700	PF3D7_0731500	0.87
PF3D7_0828200	PF3D7_1433500	0.817
PF3D7_0424600	PF3D7_1252900	0.77
PF3D7_1431700	PF3D7_1451100	0.957
PF3D7_0808300	PF3D7_1412700	0.928
PF3D7_0515100	PF3D7_0828000	0.952
PF3D7_0212300	PF3D7_0729400	0.753
PF3D7_1352900	PF3D7_1404800	0.748
PF3D7_1357000	PF3D7_1414300	0.706
PF3D7_0405000	PF3D7_1213700	0.948
PF3D7_0308600	PF3D7_1232400	0.74
PF3D7_1010200	PF3D7_1405800	0.71
PF3D7_0632800	PF3D7_1219300	0.705
PF3D7_0208600	PF3D7_0625300	0.723
PF3D7_0519400	PF3D7_0721600	0.999
PF3D7_0415900	PF3D7_0506100	0.961
PF3D7_0206600	PF3D7_1302700	0.933
PF3D7_0626100	PF3D7_1419800.2	0.714
PF3D7_0911700	PF3D7_1110600	0.8
PF3D7_1144000	PF3D7_1206700	0.912
PF3D7_1139300	PF3D7_1429400	0.726
PF3D7_0710900	PF3D7_1461200	0.967
PF3D7_0811900	PF3D7_1417500	0.796
PF3D7_0307200	PF3D7_0410700	0.861
PF3D7_1017500	PF3D7_1028700	0.891
PF3D7_1125400	PF3D7_1412500	0.703
PF3D7_1130100	PF3D7_1204300	0.985
PF3D7_1147700	PF3D7_1203600	0.9
PF3D7_0109000	PF3D7_1430200	0.701
PF3D7_1245400	PF3D7_1441200	0.97
PF3D7_0209800	PF3D7_1347500	0.848
PF3D7_1016800	PF3D7_1252900	0.835
PF3D7_1115700	PF3D7_1417500	0.716
PF3D7_1302700	PF3D7_1366500	0.957
PF3D7_1408600	PF3D7_1424400	0.999
PF3D7_0208200	PF3D7_0418700	0.908
PF3D7_1118500	PF3D7_1431300	0.736
PF3D7_1003500	PF3D7_1130100	0.999
PF3D7_0813900	PF3D7_1132700	0.959
PF3D7_1232500	PF3D7_1420200	0.733
PF3D7_0510100	PF3D7_1239200	0.758
PF3D7_0904900	PF3D7_1223700	0.743
PF3D7_0317000	PF3D7_1235300	0.95
PF3D7_0404900	PF3D7_1031800	0.735
PF3D7_0311200	PF3D7_1336900	0.819
PF3D7_0710600	PF3D7_0919600	0.904
PF3D7_0920900	PF3D7_1448000	0.746
PF3D7_1344900	PF3D7_1454200	0.713
PF3D7_0309600	PF3D7_1460300	0.999
PF3D7_0922500	PF3D7_1439900	0.999
PF3D7_0417200	PF3D7_0913900	0.802
PF3D7_1003600	PF3D7_1246200	0.714
PF3D7_0617900	PF3D7_1008000	0.772
PF3D7_1220100	PF3D7_1451100	0.923
PF3D7_1124400	PF3D7_1308900	0.983
PF3D7_0706400	PF3D7_1342000	0.958
PF3D7_1022500	PF3D7_1345700	0.993
PF3D7_1130400	PF3D7_1368100	0.999
PF3D7_0704500	PF3D7_1031800	0.703
PF3D7_1341300	PF3D7_1461300	0.997
PF3D7_1309300	PF3D7_1474500	0.92
PF3D7_0630900	PF3D7_1107700	0.817
PF3D7_0303300	PF3D7_1414800	0.942
PF3D7_0625300	PF3D7_1303800	0.869
PF3D7_0205900	PF3D7_0608500	0.996
PF3D7_0822000	PF3D7_1134700	0.899
PF3D7_0916700	PF3D7_1008400	0.9
PF3D7_0510500	PF3D7_1433500	0.999
PF3D7_0517000	PF3D7_1338200	0.999
PF3D7_0108500	PF3D7_0830500	0.91
PF3D7_0827000	PF3D7_1330800	0.765
PF3D7_0318200	PF3D7_1307300	0.945
PF3D7_0934000	PF3D7_1225100	0.86
PF3D7_0317700	PF3D7_1037600	0.802
PF3D7_0507100	PF3D7_0716800	0.747
PF3D7_0218400	PF3D7_1124800	0.782
PF3D7_0729400	PF3D7_1415200	0.866
PF3D7_0520000	PF3D7_1212700	0.981
PF3D7_0522600	PF3D7_1035100	0.939
PF3D7_0318200	PF3D7_0517400	0.883
PF3D7_1125900	PF3D7_1327700	0.766
PF3D7_0520000	PF3D7_1216300	0.926
PF3D7_0517400	PF3D7_0610900	0.968
PF3D7_1230900	PF3D7_1417500	0.725
PF3D7_1448000	PF3D7_1469300	0.996
PF3D7_1116700	PF3D7_1471100	0.806
PF3D7_0801500	PF3D7_0802300	0.994
PF3D7_0916500	PF3D7_1011700	0.782
PF3D7_0724400	PF3D7_1433500	0.721
PF3D7_1304900	PF3D7_1414800	0.933
PF3D7_0915400	PF3D7_1015900	0.987
PF3D7_0818200	PF3D7_0917900	0.825
PF3D7_1366500	PF3D7_1457200	0.742
PF3D7_1001600	PF3D7_1446600	0.747
PF3D7_0516200	PF3D7_1433500	0.792
PF3D7_1367600	PF3D7_1427800	0.714
PF3D7_0317200	PF3D7_0423500	0.769
PF3D7_1117100	PF3D7_1306400	0.986
PF3D7_1132700	PF3D7_1341200	0.882
PF3D7_1408600	PF3D7_1414300	0.999
PF3D7_0920800	PF3D7_1454400	0.815
PF3D7_0716100	PF3D7_1207100	0.856
PF3D7_0806300	PF3D7_1449100	0.814
PF3D7_0630500	PF3D7_1419100	0.98
PF3D7_1102800	PF3D7_1240100	0.893
PF3D7_0312800	PF3D7_1235400	0.928
PF3D7_1212700	PF3D7_1243600	0.999
PF3D7_0905400	PF3D7_1246400	0.714
PF3D7_0220300	PF3D7_1301400	0.734
PF3D7_0815200	PF3D7_1412300	0.996
PF3D7_1227600	PF3D7_1319400	0.722
PF3D7_1004000	PF3D7_1307600	0.856
PF3D7_1414300	PF3D7_1421200	0.999
PF3D7_1011400	PF3D7_1402300	0.998
PF3D7_0721600	PF3D7_1433500	0.789
PF3D7_0110800	PF3D7_0823300	0.984
PF3D7_1008400	PF3D7_1402300	0.999
PF3D7_0626800	PF3D7_0915400	0.926
PF3D7_0727200	PF3D7_1001400	0.724
PF3D7_1021500	PF3D7_1030100	0.723
PF3D7_0511200	PF3D7_1036800	0.743
PF3D7_0522600	PF3D7_0811600	0.701
PF3D7_0217500	PF3D7_0503400	0.784
PF3D7_0317600	PF3D7_1346100	0.855
PF3D7_0219200	PF3D7_1465900	0.999
PF3D7_1001900	PF3D7_1252600	0.706
PF3D7_1245800	PF3D7_1455500	0.712
PF3D7_0802200	PF3D7_1111100	0.748
PF3D7_1426000	PF3D7_1450100	0.957
PF3D7_0708800	PF3D7_1030100	0.754
PF3D7_1306400	PF3D7_1353800	0.999
PF3D7_1317100	PF3D7_1441400	0.961
PF3D7_1345400	PF3D7_1448500	0.761
PF3D7_0822100	PF3D7_0923900	0.772
PF3D7_0317200	PF3D7_0403600	0.728
PF3D7_0608800	PF3D7_1357900	0.863
PF3D7_0617800	PF3D7_0904700	0.759
PF3D7_0821300	PF3D7_1445200	0.875
PF3D7_0932400	PF3D7_1303100	0.898
PF3D7_0710900	PF3D7_0827500	0.926
PF3D7_0826500	PF3D7_1412700	0.93
PF3D7_1212700	PF3D7_1354300	0.756
PF3D7_0219600	PF3D7_1317100	0.892
PF3D7_0818900	PF3D7_1026800	0.774
PF3D7_1367600	PF3D7_1451100	0.898
PF3D7_0305000	PF3D7_1143300	0.726
PF3D7_0419400	PF3D7_1211700	0.739
PF3D7_1358700	PF3D7_1365100	0.707
PF3D7_0528200	PF3D7_1461300	0.929
PF3D7_1223100	PF3D7_1469200	0.961
PF3D7_1125400	PF3D7_1333000	0.849
PF3D7_0109200	PF3D7_0526500	0.732
PF3D7_0818700	PF3D7_0925700	0.814
PF3D7_1014400	PF3D7_1337100	0.762
PF3D7_0303200	PF3D7_0905400	0.778
PF3D7_0113000	PF3D7_1011800	0.813
PF3D7_0305600	PF3D7_1228600	0.758
PF3D7_1025400	PF3D7_1458300	0.744
PF3D7_1124900	PF3D7_1433500	0.781
PF3D7_1012600	PF3D7_1224400	0.889
PF3D7_0719400	PF3D7_0811900	0.753
PF3D7_0213900	PF3D7_1434500	0.727
PF3D7_0503300	PF3D7_0517300	0.996
PF3D7_0933600	PF3D7_1235700	0.908
PF3D7_1035100	PF3D7_1435300	0.77
PF3D7_1368600	PF3D7_1434700	0.852
PF3D7_0317000	PF3D7_0807800	0.999
PF3D7_1224400	PF3D7_1352200	0.999
PF3D7_0517700	PF3D7_1206200	0.999
PF3D7_1126200	PF3D7_1235400	0.958
PF3D7_0504600	PF3D7_1311300	0.729
PF3D7_0413900	PF3D7_0516700	0.782
PF3D7_0704300	PF3D7_0904900	0.852
PF3D7_0421300	PF3D7_1240400	0.893
PF3D7_0802300	PF3D7_0811500	0.77
PF3D7_1108700	PF3D7_1201100	0.712
PF3D7_0615400	PF3D7_0629700	0.748
PF3D7_1411900	PF3D7_1463400	0.732
PF3D7_0218500	PF3D7_0619900	0.98
PF3D7_0615500	PF3D7_1437200	0.874
PF3D7_1302800	PF3D7_1441200	0.998
PF3D7_0519100	PF3D7_1144000	0.999
PF3D7_1110600	PF3D7_1206600	0.849
PF3D7_1035300	PF3D7_1228600	0.775
PF3D7_0322000	PF3D7_0532100	0.78
PF3D7_1330600	PF3D7_1447000	0.931
PF3D7_1021500	PF3D7_1405800	0.892
PF3D7_0108600	PF3D7_1443900	0.869
PF3D7_0527500	PF3D7_1355500	0.725
PF3D7_1134700	PF3D7_1465900	0.907
PF3D7_0619900	PF3D7_1220100	0.805
PF3D7_0417200	PF3D7_0925400	0.821
PF3D7_0816600	PF3D7_1215300	0.863
PF3D7_0519400	PF3D7_1124900	0.998
PF3D7_0827000	PF3D7_1360100	0.702
PF3D7_0309200	PF3D7_0806600	0.879
PF3D7_0812220	PF3D7_1251700	0.786
PF3D7_0414700	PF3D7_0523100	0.731
PF3D7_0810200	PF3D7_1112200	0.936
PF3D7_0516900	PF3D7_0904400	0.904
PF3D7_1103100	PF3D7_1419700	0.71
PF3D7_1038800	PF3D7_1116800	0.8
PF3D7_0111500	PF3D7_1311300	0.783
PF3D7_0317600	PF3D7_1223900	0.999
PF3D7_1007900	PF3D7_1408600	0.947
PF3D7_1123900	PF3D7_1420400	0.715
PF3D7_0209800	PF3D7_0415900	0.855
PF3D7_0410700	PF3D7_0630900	0.84
PF3D7_0918000	PF3D7_1471400	0.792
PF3D7_1226600	PF3D7_1337100	0.983
PF3D7_0516800	PF3D7_1211700	0.728
PF3D7_0707900	PF3D7_1144000	0.893
PF3D7_1123900	PF3D7_1242700	0.937
PF3D7_1126000	PF3D7_1132200	0.818
PF3D7_0729400	PF3D7_1354300	0.964
PF3D7_0709100	PF3D7_0716300	0.79
PF3D7_1123900	PF3D7_1342000	0.905
PF3D7_0714000	PF3D7_1203700	0.804
PF3D7_0408500	PF3D7_1411400	0.728
PF3D7_0306400	PF3D7_1036800	0.828
PF3D7_1139900	PF3D7_1358700	0.732
PF3D7_0826300	PF3D7_1146000	0.71
PF3D7_0607000	PF3D7_1358800	0.977
PF3D7_1028300	PF3D7_1471000	0.708
PF3D7_1137500	PF3D7_1326000	0.705
PF3D7_0617900	PF3D7_1472200	0.767
PF3D7_0103800	PF3D7_0829600	0.752
PF3D7_0612900	PF3D7_1309100	0.826
PF3D7_1141600	PF3D7_1346100	0.745
PF3D7_0925200	PF3D7_1247900	0.916
PF3D7_0515700	PF3D7_1409400	0.918
PF3D7_0308600	PF3D7_1350200	0.873
PF3D7_1226700	PF3D7_1466700	0.819
PF3D7_1331700	PF3D7_1444800	0.754
PF3D7_1332200	PF3D7_1455300	0.909
PF3D7_0211400	PF3D7_0619500	0.739
PF3D7_0803500	PF3D7_1435300	0.83
PF3D7_0506100	PF3D7_1365900	0.998
PF3D7_1030500	PF3D7_1033700	0.936
PF3D7_1408600	PF3D7_1429700	0.832
PF3D7_1030200	PF3D7_1310700	0.904
PF3D7_0621800	PF3D7_1338200	0.829
PF3D7_1123900	PF3D7_1143300	0.804
PF3D7_1306400	PF3D7_1466300	0.999
PF3D7_1249900	PF3D7_1355500	0.75
PF3D7_0418500	PF3D7_1437800	0.998
PF3D7_1324200	PF3D7_1474500	0.95
PF3D7_0412400	PF3D7_0808700	0.775
PF3D7_0423900	PF3D7_1125800	0.779
PF3D7_0209200	PF3D7_1340100	0.994
PF3D7_0110800	PF3D7_1435300	0.987
PF3D7_0310400	PF3D7_1117100	0.768
PF3D7_0423500	PF3D7_1446600	0.799
PF3D7_1008000	PF3D7_1008100	0.813
PF3D7_0209800	PF3D7_0818900	0.849
PF3D7_1008800	PF3D7_1362200	0.996
PF3D7_0316800	PF3D7_0815600	0.948
PF3D7_0719600	PF3D7_1143300	0.962
PF3D7_0308900	PF3D7_0422500	0.773
PF3D7_0524000	PF3D7_1405800	0.72
PF3D7_0412100	PF3D7_1206600	0.873
PF3D7_0710600	PF3D7_1358800	0.998
PF3D7_0303300	PF3D7_1304900	0.999
PF3D7_1211800	PF3D7_1324700	0.752
PF3D7_1034000	PF3D7_1324700	0.919
PF3D7_1412100	PF3D7_1417800	0.825
PF3D7_0811900	PF3D7_0828200	0.855
PF3D7_1211300	PF3D7_1304900	0.9
PF3D7_1317800	PF3D7_1447000	0.999
PF3D7_1130100	PF3D7_1421200	0.999
PF3D7_0402100	PF3D7_0501100.2	0.726
PF3D7_0813900	PF3D7_1465900	0.999
PF3D7_1311500	PF3D7_1414000	0.997
PF3D7_1003500	PF3D7_1126200	0.999
PF3D7_1111000	PF3D7_1408900	0.757
PF3D7_1117700	PF3D7_1447000	0.772
PF3D7_1216000	PF3D7_1367700	0.735
PF3D7_0319600	PF3D7_1357100	0.997
PF3D7_0106700	PF3D7_0811900	0.984
PF3D7_1017400	PF3D7_1326400	0.71
PF3D7_0410700	PF3D7_1224100	0.708
PF3D7_0509400	PF3D7_1206200	0.748
PF3D7_0802600	PF3D7_1320700	0.868
PF3D7_0612700	PF3D7_1235200	0.724
PF3D7_0722600	PF3D7_1008800	0.986
PF3D7_0607300	PF3D7_1435300	0.902
PF3D7_1012600	PF3D7_1367600	0.901
PF3D7_0302000	PF3D7_1407500	0.793
PF3D7_0214100	PF3D7_0405100	0.985
PF3D7_1037000	PF3D7_1425400	0.717
PF3D7_0305600	PF3D7_0310400	0.885
PF3D7_1405600	PF3D7_1459000	0.9
PF3D7_1133400	PF3D7_1410400	0.897
PF3D7_0308900	PF3D7_1343900	0.768
PF3D7_0919100	PF3D7_1124700	0.945
PF3D7_1311900	PF3D7_1408100	0.777
PF3D7_0922500	PF3D7_1433500	0.701
PF3D7_1227600	PF3D7_1355100	0.759
PF3D7_1004000	PF3D7_1426000	0.999
PF3D7_1030100	PF3D7_1404500	0.879
PF3D7_1433600	PF3D7_1447000	0.9
PF3D7_0822300	PF3D7_1367100	0.987
PF3D7_0922400	PF3D7_1219900	0.805
PF3D7_0106700	PF3D7_1358100	0.87
PF3D7_1323100	PF3D7_1366600	0.94
PF3D7_1246200	PF3D7_1345600	0.732
PF3D7_0910600	PF3D7_1211800	0.749
PF3D7_0623900	PF3D7_0918600	0.709
PF3D7_0320100	PF3D7_0512600	0.936
PF3D7_0317600	PF3D7_1323100	0.999
PF3D7_0317200	PF3D7_1224100	0.766
PF3D7_0415900	PF3D7_1124800	0.764
PF3D7_1022600	PF3D7_1319300	0.798
PF3D7_1109400	PF3D7_1431300	0.793
PF3D7_0507100	PF3D7_1213800	0.805
PF3D7_0317200	PF3D7_0501800	0.754
PF3D7_1243700	PF3D7_1361400	0.733
PF3D7_1212300	PF3D7_1213600	0.854
PF3D7_0907400	PF3D7_1118200	0.895
PF3D7_0818200	PF3D7_0818900	0.738
PF3D7_0624500	PF3D7_1367000	0.997
PF3D7_1246200	PF3D7_1446600	0.789
PF3D7_1008100	PF3D7_1023900	0.769
PF3D7_0516800	PF3D7_1448500	0.73
PF3D7_1433500	PF3D7_1464900	0.813
PF3D7_1019000	PF3D7_1338300	0.732
PF3D7_1017500	PF3D7_1218000	0.88
PF3D7_0807900	PF3D7_0934000	0.93
PF3D7_1035100	PF3D7_1406800	0.765
PF3D7_1010600	PF3D7_1144000	0.97
PF3D7_0517700	PF3D7_1107700	0.714
PF3D7_0919400	PF3D7_1417800	0.703
PF3D7_1016800	PF3D7_1115800	0.918
PF3D7_0621300	PF3D7_1028400	0.754
PF3D7_0708400	PF3D7_1465900	0.781
PF3D7_0311200	PF3D7_0920800	0.771
PF3D7_0516200	PF3D7_1332800	0.786
PF3D7_0307100	PF3D7_1224300	0.916
PF3D7_0217500	PF3D7_0404900	0.817
PF3D7_1302700	PF3D7_1434500	0.851
PF3D7_1345100	PF3D7_1438900	0.912
PF3D7_0924700	PF3D7_1474500	0.999
PF3D7_1213700	PF3D7_1234800	0.9
PF3D7_1407100	PF3D7_1415800	0.814
PF3D7_1217200	PF3D7_1354300	0.982
PF3D7_0403500	PF3D7_1460400	0.825
PF3D7_1003800	PF3D7_1358800	0.832
PF3D7_0613400	PF3D7_1472700	0.96
PF3D7_1124700	PF3D7_1318800	0.715
PF3D7_0524900	PF3D7_1237200	0.77
PF3D7_1323100	PF3D7_1433500	0.787
PF3D7_0605000	PF3D7_1358800	0.815
PF3D7_0106100	PF3D7_1140100	0.999
PF3D7_1002100	PF3D7_1404800	0.92
PF3D7_0621300	PF3D7_1225500	0.759
PF3D7_0422700	PF3D7_1441200	0.937
PF3D7_1332000	PF3D7_1412700	0.808
PF3D7_0513800	PF3D7_0903700	0.735
PF3D7_1144900	PF3D7_1472100	0.907
PF3D7_0934000	PF3D7_1461900	0.776
PF3D7_1435300	PF3D7_1454700	0.763
PF3D7_1440800	PF3D7_1471200	0.719
PF3D7_0302200	PF3D7_0802100	0.709
PF3D7_0402000	PF3D7_1215300	0.737
PF3D7_0612900	PF3D7_0707900	0.999
PF3D7_0218500	PF3D7_1004400	0.935
PF3D7_0526500	PF3D7_0625600	0.998
PF3D7_1123900	PF3D7_1130200	0.838
PF3D7_0217100	PF3D7_1424100	0.707
PF3D7_1338300	PF3D7_1431700	0.733
PF3D7_0404900	PF3D7_0704500	0.881
PF3D7_1020800	PF3D7_1124500	0.999
PF3D7_0725200	PF3D7_1308300	0.905
PF3D7_0305600	PF3D7_0613800	0.837
PF3D7_0814300	PF3D7_1251500	0.926
PF3D7_0519200	PF3D7_1143400	0.718
PF3D7_0919200	PF3D7_1218000	0.765
PF3D7_0729300	PF3D7_1407100	0.781
PF3D7_0520000	PF3D7_1211800	0.85
PF3D7_0306400	PF3D7_0718100	0.704
PF3D7_0111300	PF3D7_1226600	0.98
PF3D7_0603700	PF3D7_1435300	0.777
PF3D7_0214200	PF3D7_1348300	0.863
PF3D7_0818900	PF3D7_1357800	0.9
PF3D7_1041200	PF3D7_1100800	0.827
PF3D7_0422400	PF3D7_1109900	0.999
PF3D7_0415500	PF3D7_0618300	0.915
PF3D7_0306800	PF3D7_1004000	0.84
PF3D7_1124900	PF3D7_1341200	0.999
PF3D7_0112000	PF3D7_0417200	0.719
PF3D7_0303200	PF3D7_1035100	0.891
PF3D7_0831200	PF3D7_1116800	0.715
PF3D7_0921800	PF3D7_1332700	0.916
PF3D7_0923000	PF3D7_1202000	0.934
PF3D7_1132200	PF3D7_1358800	0.862
PF3D7_0710900	PF3D7_1003800	0.949
PF3D7_1020700	PF3D7_1463400	0.811
PF3D7_1407100	PF3D7_1426200	0.977
PF3D7_0405200	PF3D7_1430200	0.794
PF3D7_0828200	PF3D7_1445100	0.939
PF3D7_0618300	PF3D7_1144000	0.997
PF3D7_1008900	PF3D7_1354400	0.766
PF3D7_0923000	PF3D7_1004000	0.869
PF3D7_1341200	PF3D7_1366600	0.948
PF3D7_0217800	PF3D7_0904400	0.904
PF3D7_0525000	PF3D7_0730900	0.812
PF3D7_0108500	PF3D7_0730800.2	0.904
PF3D7_1352200	PF3D7_1408600	0.75
PF3D7_0621800	PF3D7_1323100	0.758
PF3D7_1437000	PF3D7_1443800	0.759
PF3D7_1131100	PF3D7_1215900	0.741
PF3D7_1312900	PF3D7_1426000	0.912
PF3D7_0827500	PF3D7_1223900	0.879
PF3D7_1251700	PF3D7_1336900	0.957
PF3D7_0728000	PF3D7_1206200	0.992
PF3D7_0710900	PF3D7_1447000	0.969
PF3D7_1224400	PF3D7_1357700	0.998
PF3D7_0219200	PF3D7_1365900	0.999
PF3D7_0424500	PF3D7_1105600	0.769
PF3D7_0618300	PF3D7_1110600	0.947
PF3D7_0321200	PF3D7_0417200	0.742
PF3D7_0934800	PF3D7_1446600	0.706
PF3D7_1116800	PF3D7_1471100	0.748
PF3D7_1233300	PF3D7_1435000	0.799
PF3D7_1430900	PF3D7_1475300	0.98
PF3D7_0716800	PF3D7_0719600	0.719
PF3D7_1243700	PF3D7_1301600	0.73
PF3D7_1344200	PF3D7_1454500	0.943
PF3D7_0723400	PF3D7_1419100	0.791
PF3D7_0822300	PF3D7_1033600	0.975
PF3D7_0306300	PF3D7_1015800	0.74
PF3D7_1028700	PF3D7_1232500	0.725
PF3D7_1343300	PF3D7_1343400	0.824
PF3D7_1345600	PF3D7_1439500	0.863
PF3D7_1308200	PF3D7_1424100	0.702
PF3D7_0211200	PF3D7_1406700	0.77
PF3D7_0830600	PF3D7_0935900	0.731
PF3D7_1343200	PF3D7_1354300	0.743
PF3D7_0306800	PF3D7_0814000	0.792
PF3D7_1027100	PF3D7_1367600	0.706
PF3D7_0219200	PF3D7_0618300	0.99
PF3D7_1407500	PF3D7_1469300	0.755
PF3D7_0307200	PF3D7_1026800	0.979
PF3D7_0518300	PF3D7_1224300	0.9
PF3D7_1317800	PF3D7_1461200	0.995
PF3D7_0305600	PF3D7_1433500	0.78
PF3D7_0819000	PF3D7_1009200	0.713
PF3D7_0817700	PF3D7_0932200	0.777
PF3D7_0803700	PF3D7_1361900	0.785
PF3D7_0505000	PF3D7_1324000	0.746
PF3D7_0307200	PF3D7_0711000	0.729
PF3D7_0725300	PF3D7_1302700	0.847
PF3D7_0600200	PF3D7_1240300	0.769
PF3D7_1224300	PF3D7_1431700	0.922
PF3D7_0716100	PF3D7_1301400	0.75
PF3D7_0814300	PF3D7_1428300	0.775
PF3D7_0303300	PF3D7_0517300	0.924
PF3D7_0312300	PF3D7_0931800	0.999
PF3D7_1012600	PF3D7_1329000	0.913
PF3D7_1401100	PF3D7_1411900	0.722
PF3D7_0318200	PF3D7_0705700	0.702
PF3D7_1116700	PF3D7_1447000	0.714
PF3D7_1124700	PF3D7_1136800	0.936
PF3D7_0929400	PF3D7_1228600	0.947
PF3D7_0322500	PF3D7_1352100	0.786
PF3D7_0406100	PF3D7_1464700	0.997
PF3D7_0708800	PF3D7_0806500	0.766
PF3D7_1206600	PF3D7_1429800	0.927
PF3D7_0622800	PF3D7_1410600	0.707
PF3D7_0106700	PF3D7_0411400	0.85
PF3D7_0719300	PF3D7_1361400	0.876
PF3D7_0114500	PF3D7_1201100	0.748
PF3D7_1125500	PF3D7_1213700	0.927
PF3D7_0720400	PF3D7_1431600	0.71
PF3D7_0319400	PF3D7_0605300	0.767
PF3D7_0704500	PF3D7_0929400	0.882
PF3D7_0115700	PF3D7_1150400	0.742
PF3D7_0106700	PF3D7_0414700	0.761
PF3D7_0630500	PF3D7_0811900	0.873
PF3D7_1010200	PF3D7_1434500	0.903
PF3D7_1228700	PF3D7_1306200	0.73
PF3D7_0403900	PF3D7_0806300	0.72
PF3D7_0818900	PF3D7_1015600	0.961
PF3D7_0506100	PF3D7_1351400	0.894
PF3D7_0614900	PF3D7_0723800	0.728
PF3D7_0405400	PF3D7_1004300	0.742
PF3D7_0916500	PF3D7_1365100	0.729
PF3D7_0320900	PF3D7_1433500	0.942
PF3D7_0929400	PF3D7_1146600	0.784
PF3D7_0503500	PF3D7_1315900	0.962
PF3D7_0102500	PF3D7_1125800	0.968
PF3D7_0208200	PF3D7_1226700	0.987
PF3D7_0308900	PF3D7_1126800	0.9
PF3D7_0402100	PF3D7_0502400	0.765
PF3D7_0612900	PF3D7_1226700	0.841
PF3D7_0630500	PF3D7_0729400	0.999
PF3D7_0303200	PF3D7_1246200	0.78
PF3D7_0614500	PF3D7_1424400	0.999
PF3D7_0110400	PF3D7_1231600	0.906
PF3D7_0409100	PF3D7_1225500	0.73
PF3D7_0927300	PF3D7_1456000	0.777
PF3D7_1331800	PF3D7_1462800	0.703
PF3D7_0508200	PF3D7_1141600	0.945
PF3D7_0404900	PF3D7_1031200	0.774
PF3D7_0729400	PF3D7_1251500	0.988
PF3D7_0527300	PF3D7_1434600	0.994
PF3D7_0814000	PF3D7_1012600	0.757
PF3D7_1351100	PF3D7_1461300	0.75
PF3D7_0920800	PF3D7_1419800.2	0.797
PF3D7_1211700	PF3D7_1361700	0.806
PF3D7_1217200	PF3D7_1226700	0.92
PF3D7_0220100	PF3D7_1332700	0.745
PF3D7_1235400	PF3D7_1465900	0.972
PF3D7_1251500	PF3D7_1451900	0.971
PF3D7_0506900	PF3D7_1406800	0.767
PF3D7_0206600	PF3D7_0520600	0.928
PF3D7_0811000	PF3D7_1345500	0.806
PF3D7_0317600	PF3D7_0814000	0.998
PF3D7_1405600	PF3D7_1457200	0.751
PF3D7_0424900	PF3D7_0713200	0.87
PF3D7_1223800	PF3D7_1223900	0.872
PF3D7_1237200	PF3D7_1302700	0.732
PF3D7_1358100	PF3D7_1451900	0.749
PF3D7_1448500	PF3D7_1460500	0.88
PF3D7_0319000	PF3D7_1456000	0.719
PF3D7_1027100	PF3D7_1217200	0.945
PF3D7_0726500	PF3D7_1365900	0.815
PF3D7_0818200	PF3D7_1232100	0.75
PF3D7_1140400	PF3D7_1321500.2	0.721
PF3D7_0506900	PF3D7_1223100	0.853
PF3D7_0502400	PF3D7_0731100	0.782
PF3D7_0819100	PF3D7_0902200	0.709
PF3D7_1106100	PF3D7_1424100	0.916
PF3D7_0318200	PF3D7_1010200	0.983
PF3D7_1130400	PF3D7_1224300	0.9
PF3D7_1026800	PF3D7_1426000	0.999
PF3D7_0706000	PF3D7_1211800	0.759
PF3D7_1144500	PF3D7_1367000	0.977
PF3D7_0708800	PF3D7_1015900	0.822
PF3D7_0527900	PF3D7_1107300	0.716
PF3D7_0611700	PF3D7_1338200	0.999
PF3D7_1008900	PF3D7_1012400	0.897
PF3D7_0807800	PF3D7_1313000	0.929
PF3D7_0205500	PF3D7_0504400	0.9
PF3D7_0203700	PF3D7_1471000	0.874
PF3D7_0913900	PF3D7_0920800	0.741
PF3D7_0219200	PF3D7_1003500	0.998
PF3D7_0522600	PF3D7_1320700	0.784
PF3D7_1027800	PF3D7_1461200	0.993
PF3D7_0622900	PF3D7_1317200	0.737
PF3D7_1203400	PF3D7_1306200	0.765
PF3D7_1012400	PF3D7_1431800	0.908
PF3D7_0422700	PF3D7_0516900	0.944
PF3D7_0316800	PF3D7_0613400	0.999
PF3D7_0208200	PF3D7_0410700	0.775
PF3D7_0400400	PF3D7_1240900	0.72
PF3D7_0802100	PF3D7_1446600	0.734
PF3D7_0821300	PF3D7_1439100	0.842
PF3D7_1039100	PF3D7_1433500	0.721
PF3D7_0315100	PF3D7_1312900	0.964
PF3D7_1103700	PF3D7_1318800	0.87
PF3D7_1212800	PF3D7_1235700	0.843
PF3D7_0610100	PF3D7_1248200	0.97
PF3D7_1332800	PF3D7_1410900	0.903
PF3D7_0624600	PF3D7_1008000	0.829
PF3D7_0424900	PF3D7_0935600	0.713
PF3D7_0907700	PF3D7_0912900	0.952
PF3D7_0822500	PF3D7_1213600	0.884
PF3D7_0803500	PF3D7_1309600	0.727
PF3D7_1225500	PF3D7_1428300	0.762
PF3D7_0826700	PF3D7_1408100	0.972
PF3D7_0219700	PF3D7_1407900	0.713
PF3D7_0705700	PF3D7_1003800	0.931
PF3D7_0821100	PF3D7_1249300	0.718
PF3D7_0802600	PF3D7_1007200	0.797
PF3D7_1206200	PF3D7_1224300	0.944
PF3D7_0516900	PF3D7_0826700	0.999
PF3D7_1147500	PF3D7_1242600	0.999
PF3D7_0113700	PF3D7_0113900	0.761
PF3D7_0320900	PF3D7_1203700	0.995
PF3D7_1113400	PF3D7_1418000	0.829
PF3D7_1109400	PF3D7_1445200	0.885
PF3D7_1352200	PF3D7_1423000	0.824
PF3D7_1226700	PF3D7_1354300	0.932
PF3D7_0824800	PF3D7_1313900	0.787
PF3D7_0730800.2	PF3D7_0830500	0.91
PF3D7_0807900	PF3D7_1005000	0.804
PF3D7_1332800	PF3D7_1367600	0.99
PF3D7_0210600	PF3D7_1335100	0.836
PF3D7_0215700	PF3D7_0822800	0.93
PF3D7_0306800	PF3D7_1215300	0.999
PF3D7_1322000	PF3D7_1406600	0.746
PF3D7_0927900	PF3D7_1315600	0.708
PF3D7_1242800	PF3D7_1243000	0.921
PF3D7_1319400	PF3D7_1325900	0.774
PF3D7_1105400	PF3D7_1123400	0.971
PF3D7_0818800	PF3D7_1461200	0.998
PF3D7_0814300	PF3D7_1005100	0.76
PF3D7_1017900	PF3D7_1365900	0.95
PF3D7_0730800.2	PF3D7_1201200	0.825
PF3D7_0424700	PF3D7_0936400	0.709
PF3D7_1001900	PF3D7_1401100	0.76
PF3D7_0423500	PF3D7_0613800	0.868
PF3D7_0822800	PF3D7_1110200	0.997
PF3D7_0324900	PF3D7_0800300	0.88
PF3D7_0817000	PF3D7_1144500	0.748
PF3D7_1206600	PF3D7_1331800	0.891
PF3D7_0217500	PF3D7_0932000	0.842
PF3D7_0501800	PF3D7_1133200	0.776
PF3D7_0100100	PF3D7_0420700	0.702
PF3D7_0918300	PF3D7_1126200	0.96
PF3D7_0932800	PF3D7_1315900	0.84
PF3D7_1012600	PF3D7_1325100	0.935
PF3D7_0307200	PF3D7_0613400	0.999
PF3D7_0310400	PF3D7_1325900	0.795
PF3D7_0515700	PF3D7_1344300	0.748
PF3D7_0111800	PF3D7_0315100	0.895
PF3D7_0516900	PF3D7_0913200	0.811
PF3D7_1110200	PF3D7_1364800	0.908
PF3D7_1361900	PF3D7_1405600	0.998
PF3D7_0904700	PF3D7_1235600	0.776
PF3D7_1211800	PF3D7_1365900	0.968
PF3D7_0412100	PF3D7_0602400	0.969
PF3D7_0817700	PF3D7_1223100	0.884
PF3D7_0506100	PF3D7_1342000	0.962
PF3D7_0715900	PF3D7_1320100	0.723
PF3D7_1111100	PF3D7_1347100	0.805
PF3D7_0419400	PF3D7_1146600	0.708
PF3D7_0807800	PF3D7_1130400	0.999
PF3D7_1402500	PF3D7_1424100	0.863
PF3D7_1145800	PF3D7_1358100	0.74
PF3D7_0415500	PF3D7_1309100	0.947
PF3D7_1209200	PF3D7_1325000	0.999
PF3D7_0918000	PF3D7_1409400	0.831
PF3D7_0312500	PF3D7_1440800	0.717
PF3D7_0813900	PF3D7_1331800	0.999
PF3D7_1323400	PF3D7_1426100	0.932
PF3D7_0519100	PF3D7_1460700	0.796
PF3D7_0204500	PF3D7_1435300	0.774
PF3D7_0915400	PF3D7_1003800	0.713
PF3D7_0821700	PF3D7_1142500	0.929
PF3D7_0406500	PF3D7_1038800	0.819
PF3D7_0322900	PF3D7_1206200	0.935
PF3D7_1034900	PF3D7_1433500	0.905
PF3D7_1017500	PF3D7_1133400	0.895
PF3D7_0721600	PF3D7_1460300	0.985
PF3D7_0501300	PF3D7_0936300	0.915
PF3D7_1031200	PF3D7_1431400	0.719
PF3D7_1039000	PF3D7_1478600	0.832
PF3D7_1203400	PF3D7_1319400	0.707
PF3D7_1424400	PF3D7_1441200	0.999
PF3D7_0706400	PF3D7_1245400	0.808
PF3D7_0302000	PF3D7_1234800	0.897
PF3D7_0725400	PF3D7_0934600	0.766
PF3D7_1211800	PF3D7_1414300	0.927
PF3D7_0303700	PF3D7_0920800	0.777
PF3D7_1230900	PF3D7_1247900	0.819
PF3D7_1037100	PF3D7_1472700	0.928
PF3D7_1234800	PF3D7_1343900	0.762
PF3D7_0508100	PF3D7_1223100	0.831
PF3D7_0300400	PF3D7_0422400	0.747
PF3D7_0517000	PF3D7_1421200	0.981
PF3D7_0730300	PF3D7_0906600	0.884
PF3D7_0110400	PF3D7_0504200	0.916
PF3D7_1355500	PF3D7_1443900	0.972
PF3D7_0516800	PF3D7_0715200	0.749
PF3D7_0511200	PF3D7_1232300	0.989
PF3D7_0725200	PF3D7_1027800	0.943
PF3D7_0724400	PF3D7_1038800	0.706
PF3D7_1323400	PF3D7_1348300	0.932
PF3D7_0214200	PF3D7_0312800	0.962
PF3D7_0710900	PF3D7_1004000	0.959
PF3D7_0519100	PF3D7_0519400	0.864
PF3D7_0905900	PF3D7_1144900	0.857
PF3D7_0415600	PF3D7_1113200	0.73
PF3D7_0925300	PF3D7_1355100	0.733
PF3D7_1144000	PF3D7_1246800	0.9
PF3D7_1020700	PF3D7_1201500	0.826
PF3D7_0306800	PF3D7_0708400	0.853
PF3D7_0302500	PF3D7_1133400	0.869
PF3D7_0518500	PF3D7_0610100	0.77
PF3D7_0302500	PF3D7_1409400	0.862
PF3D7_1013800	PF3D7_1223100	0.847
PF3D7_0418700	PF3D7_1358100	0.721
PF3D7_0419300	PF3D7_1203000	0.702
PF3D7_1035100	PF3D7_1431400	0.751
PF3D7_0820000	PF3D7_0826100	0.803
PF3D7_0218500	PF3D7_1126800	0.9
PF3D7_0113900	PF3D7_1370300	0.786
PF3D7_1332700	PF3D7_1445900	0.742
PF3D7_0712900	PF3D7_0808600	0.847
PF3D7_1126200	PF3D7_1307600	0.959
PF3D7_0904700	PF3D7_1361700	0.74
PF3D7_0207600	PF3D7_0507500	0.886
PF3D7_1309600	PF3D7_1358100	0.717
PF3D7_1002100	PF3D7_1252900	0.877
PF3D7_0206200	PF3D7_1410400	0.748
PF3D7_0421100	PF3D7_1240600	0.858
PF3D7_0417200	PF3D7_0709000	0.747
PF3D7_0830600	PF3D7_1472200	0.71
PF3D7_1317900	PF3D7_1445200	0.796
PF3D7_0208600	PF3D7_0501800	0.738
PF3D7_0716200	PF3D7_1230900	0.842
PF3D7_1105400	PF3D7_1338200	0.999
PF3D7_0904000	PF3D7_1468100	0.962
PF3D7_0903200	PF3D7_1432800	0.83
PF3D7_1220300	PF3D7_1312100	0.736
PF3D7_0519400	PF3D7_0705700	0.999
PF3D7_1352200	PF3D7_1354300	0.765
PF3D7_0203700	PF3D7_1021500	0.79
PF3D7_0623000	PF3D7_1410200	0.751
PF3D7_0210600	PF3D7_1246200	0.704
PF3D7_1211800	PF3D7_1460400	0.92
PF3D7_1032400	PF3D7_1227600	0.768
PF3D7_1325100	PF3D7_1447000	0.827
[truncated: 37,197 more rows]

## Sheet: LT_network
Gene1	Gene2	Score
PF3D7_0419400	PF3D7_0802800	0.818
PF3D7_0302500	PF3D7_1301600	0.89
PF3D7_0217800	PF3D7_0710600	0.992
PF3D7_0209600	PF3D7_0507200	0.784
PF3D7_1004300	PF3D7_1365900	0.753
PF3D7_0726100	PF3D7_1102700	0.732
PF3D7_0516800	PF3D7_1014300	0.751
PF3D7_1209900	PF3D7_1433500	0.764
PF3D7_0424700	PF3D7_1477500	0.837
PF3D7_0803200	PF3D7_1252100	0.914
PF3D7_0817800	PF3D7_1409400	0.743
PF3D7_0207100	PF3D7_0414900	0.763
PF3D7_0409600	PF3D7_1364800	0.734
PF3D7_0520000	PF3D7_1338300	0.884
PF3D7_1237000	PF3D7_1365900	0.891
PF3D7_0730800.2	PF3D7_1465400	0.763
PF3D7_1127100	PF3D7_1361900	0.956
PF3D7_0507100	PF3D7_0516200	0.999
PF3D7_0103600	PF3D7_1364300	0.792
PF3D7_1008700	PF3D7_1333700	0.768
PF3D7_0805400	PF3D7_1027800	0.703
PF3D7_0209600	PF3D7_1107100	0.733
PF3D7_1015800	PF3D7_1307300	0.914
PF3D7_0719600	PF3D7_0824300	0.74
PF3D7_0520400	PF3D7_1209100	0.76
PF3D7_0306800	PF3D7_1424100	0.785
PF3D7_0507100	PF3D7_0509400	0.857
PF3D7_0708100	PF3D7_0813900	0.723
PF3D7_0207600	PF3D7_1252100	0.91
PF3D7_0514300	PF3D7_1225100	0.874
PF3D7_0217500	PF3D7_1125800	0.86
PF3D7_1220100	PF3D7_1248200	0.991
PF3D7_0512200	PF3D7_1229100	0.708
PF3D7_0302500	PF3D7_0501600	0.919
PF3D7_0618300	PF3D7_1204300	0.719
PF3D7_0307100	PF3D7_0516200	0.999
PF3D7_0316800	PF3D7_1357100	0.944
PF3D7_1015100	PF3D7_1033600	0.994
PF3D7_0614000	PF3D7_1333200	0.702
PF3D7_0725400	PF3D7_0919200	0.875
PF3D7_0520000	PF3D7_1033400	0.75
PF3D7_0522600	PF3D7_1344300	0.733
PF3D7_1351400	PF3D7_1408600	0.999
PF3D7_0515900	PF3D7_1309200	0.718
PF3D7_0322900	PF3D7_0503800	0.999
PF3D7_0905400	PF3D7_1007200	0.89
PF3D7_0522500	PF3D7_0618300	0.962
PF3D7_0317200	PF3D7_1321500.2	0.786
PF3D7_0831600	PF3D7_1310700	0.795
PF3D7_0807700	PF3D7_0920800	0.701
PF3D7_0418700	PF3D7_0729300	0.875
PF3D7_0518300	PF3D7_1353800	0.999
PF3D7_0211800	PF3D7_1034900	0.821
PF3D7_0517700	PF3D7_1405800	0.741
PF3D7_0517000	PF3D7_1424400	0.998
PF3D7_1107700	PF3D7_1431300	0.972
PF3D7_1329400	PF3D7_1431800	0.919
PF3D7_0210600	PF3D7_0805200	0.91
PF3D7_0419400	PF3D7_1335100	0.723
PF3D7_0415900	PF3D7_1005500	0.9
PF3D7_1241800	PF3D7_1404500	0.821
PF3D7_0802800	PF3D7_1232500	0.92
PF3D7_0802300	PF3D7_1354300	0.971
PF3D7_0802800	PF3D7_1451700	0.963
PF3D7_0520000	PF3D7_0827500	0.816
PF3D7_0519400	PF3D7_1242700	0.999
PF3D7_0709100	PF3D7_0908300.2	0.727
PF3D7_0110900	PF3D7_0516200	0.772
PF3D7_0625600	PF3D7_0923900	0.806
PF3D7_0904400	PF3D7_1460700	0.909
PF3D7_1127600	PF3D7_1361800	0.741
PF3D7_0507500	PF3D7_1351700	0.927
PF3D7_1103100	PF3D7_1358800	0.999
PF3D7_1020300	PF3D7_1122900	0.786
PF3D7_0419900	PF3D7_1033700	0.73
PF3D7_1015600	PF3D7_1357100	0.73
PF3D7_0415900	PF3D7_1347500	0.831
PF3D7_1140700	PF3D7_1406200	0.718
PF3D7_0418600	PF3D7_1022700	0.725
PF3D7_0218700	PF3D7_1324200	0.98
PF3D7_1034000	PF3D7_1243000	0.967
PF3D7_0407800	PF3D7_0423500	0.873
PF3D7_0903900	PF3D7_1429700	0.966
PF3D7_1343300	PF3D7_1343400	0.824
PF3D7_0308900	PF3D7_1439100	0.917
PF3D7_1115600	PF3D7_1353600	0.734
PF3D7_0505500	PF3D7_1130700	0.761
PF3D7_1013100	PF3D7_1469300	0.904
PF3D7_0415500	PF3D7_1341200	0.923
PF3D7_1007900	PF3D7_1317800	0.96
PF3D7_0302500	PF3D7_0611600	0.713
PF3D7_0609800	PF3D7_1471400	0.703
PF3D7_1224500	PF3D7_1226600	0.869
PF3D7_0309600	PF3D7_1366600	0.93
PF3D7_0612900	PF3D7_0703900	0.729
PF3D7_0618300	PF3D7_1346100	0.928
PF3D7_0217500	PF3D7_1218000	0.803
PF3D7_0805700	PF3D7_1464500	0.792
PF3D7_0501800	PF3D7_1427900	0.748
PF3D7_1309100	PF3D7_1451100	0.977
PF3D7_0920800	PF3D7_1357800	0.923
PF3D7_0316800	PF3D7_1308300	0.999
PF3D7_0312800	PF3D7_0316800	0.999
PF3D7_1322200	PF3D7_1325400	0.733
PF3D7_0612900	PF3D7_1005100	0.776
PF3D7_1030700	PF3D7_1311700	0.709
PF3D7_0912800	PF3D7_1110500	0.72
PF3D7_0419400	PF3D7_1227000	0.746
PF3D7_0317600	PF3D7_1367600	0.972
PF3D7_0409200	PF3D7_0729300	0.823
PF3D7_1249500	PF3D7_1417800	0.754
PF3D7_1030200	PF3D7_1459900	0.732
PF3D7_0516100	PF3D7_1219600	0.799
PF3D7_0413700	PF3D7_1306200	0.801
PF3D7_0721600	PF3D7_1429700	0.979
PF3D7_1225100	PF3D7_1357200	0.903
PF3D7_0628100	PF3D7_0723300	0.844
PF3D7_0303200	PF3D7_1345600	0.72
PF3D7_0306900	PF3D7_0517000	0.998
PF3D7_0807800	PF3D7_1333200	0.718
PF3D7_1326000	PF3D7_1361700	0.707
PF3D7_0716200	PF3D7_1012600	0.725
PF3D7_1310600	PF3D7_1346100	0.95
PF3D7_1019600	PF3D7_1227000	0.8
PF3D7_0517000	PF3D7_1421200	0.981
PF3D7_1122900	PF3D7_1213600	0.958
PF3D7_0731100	PF3D7_1436300	0.897
PF3D7_0517000	PF3D7_0721600	0.999
PF3D7_0404900	PF3D7_0515700	0.788
PF3D7_1232500	PF3D7_1235200	0.814
PF3D7_1202200	PF3D7_1211700	0.722
PF3D7_0716100	PF3D7_1330800	0.828
PF3D7_0607700	PF3D7_0927300	0.806
PF3D7_0804600	PF3D7_0908600	0.768
PF3D7_0817700	PF3D7_1013800	0.735
PF3D7_0316800	PF3D7_1249900	0.743
PF3D7_1116100	PF3D7_1410400	0.91
PF3D7_0626800	PF3D7_1446200	0.776
PF3D7_0707900	PF3D7_1367600	0.998
PF3D7_0810400	PF3D7_1216100	0.745
PF3D7_0417200	PF3D7_0708400	0.901
PF3D7_0614500	PF3D7_1026800	0.999
PF3D7_0302200	PF3D7_0508100	0.716
PF3D7_0520300	PF3D7_1438900	0.766
PF3D7_0306800	PF3D7_1229500	0.999
PF3D7_0306900	PF3D7_0707900	0.893
PF3D7_0704200	PF3D7_0821500	0.862
PF3D7_1220300	PF3D7_1360500	0.767
PF3D7_0110800	PF3D7_0925700	0.834
PF3D7_0630500	PF3D7_1023200	0.76
PF3D7_0419600	PF3D7_0627700	0.83
PF3D7_1130200	PF3D7_1431300	0.862
PF3D7_0205500	PF3D7_1241800	0.91
PF3D7_1234300	PF3D7_1463300	0.984
PF3D7_0921200	PF3D7_1405800	0.701
PF3D7_0607700	PF3D7_1435300	0.789
PF3D7_1118500	PF3D7_1445200	0.772
PF3D7_0320100	PF3D7_0905900	0.987
PF3D7_0206200	PF3D7_1036000	0.897
PF3D7_1006600	PF3D7_1215000	0.715
PF3D7_0827900	PF3D7_1222300	0.904
PF3D7_1037600	PF3D7_1429900	0.864
PF3D7_0710600	PF3D7_1447000	0.989
PF3D7_0826700	PF3D7_1365900	0.998
PF3D7_0625300	PF3D7_1331100	0.779
PF3D7_1123800	PF3D7_1433500	0.898
PF3D7_0415900	PF3D7_0903900	0.999
PF3D7_0307100	PF3D7_1123400	0.925
PF3D7_0515700	PF3D7_1361800	0.901
PF3D7_1137100	PF3D7_1144000	0.866
PF3D7_0207600	PF3D7_1439000	0.711
PF3D7_1308200	PF3D7_1311900	0.771
PF3D7_0516200	PF3D7_0607000	0.953
PF3D7_0507200	PF3D7_0630400	0.73
PF3D7_0520000	PF3D7_0605000	0.957
PF3D7_0308600	PF3D7_1418000	0.701
PF3D7_1247000.2	PF3D7_1471400	0.715
PF3D7_0520000	PF3D7_1123900	0.773
PF3D7_0107800	PF3D7_0615500	0.761
PF3D7_1210700	PF3D7_1234600	0.738
PF3D7_1211800	PF3D7_1357800	0.795
PF3D7_0614500	PF3D7_1460700	0.999
PF3D7_1124900	PF3D7_1358800	0.999
PF3D7_0306400	PF3D7_1137500	0.78
PF3D7_0517300	PF3D7_0909800	0.944
PF3D7_0415500	PF3D7_1144000	0.916
PF3D7_0207800	PF3D7_0508100	0.881
PF3D7_1008800	PF3D7_1110200	0.736
PF3D7_1008800	PF3D7_1013100	0.996
PF3D7_1023200	PF3D7_1308200	0.999
PF3D7_0522500	PF3D7_1124900	0.952
PF3D7_0414000	PF3D7_1306200	0.778
PF3D7_0716300	PF3D7_0902800	0.745
PF3D7_0808300	PF3D7_0826500	0.982
PF3D7_1404500	PF3D7_1448000	0.949
PF3D7_0827000	PF3D7_1360100	0.702
PF3D7_1107700	PF3D7_1109400	0.977
PF3D7_0110700	PF3D7_0925700	0.985
PF3D7_0106700	PF3D7_1443900	0.937
PF3D7_0630400	PF3D7_1343100	0.718
PF3D7_0316800	PF3D7_1309100	0.999
PF3D7_1232000	PF3D7_1308200	0.795
PF3D7_0418600	PF3D7_1351700	0.888
PF3D7_0830600	PF3D7_1149200	0.738
PF3D7_0905400	PF3D7_1322500	0.764
PF3D7_1209900	PF3D7_1368700	0.748
PF3D7_0628100	PF3D7_1136200	0.87
PF3D7_0319000	PF3D7_1322600	0.741
PF3D7_1347200	PF3D7_1453700	0.82
PF3D7_0827500	PF3D7_1450100	0.734
PF3D7_1319300	PF3D7_1429400	0.75
PF3D7_0805200	PF3D7_1238900	0.79
PF3D7_1019600	PF3D7_1122700	0.743
PF3D7_0528400	PF3D7_1125800	0.732
PF3D7_0305600	PF3D7_0803200	0.72
PF3D7_0212900	PF3D7_0919900	0.711
PF3D7_0111300	PF3D7_0625300	0.708
PF3D7_0922400	PF3D7_1324000	0.784
PF3D7_0208600	PF3D7_1115000	0.781
PF3D7_0102200	PF3D7_0708800	0.817
PF3D7_0629700	PF3D7_1410600	0.761
PF3D7_0706400	PF3D7_1461300	0.987
PF3D7_0318200	PF3D7_1433500	0.81
PF3D7_0307200	PF3D7_1109900	0.998
PF3D7_0723300	PF3D7_1133400	0.757
PF3D7_0503300	PF3D7_1213700	0.918
PF3D7_0613800	PF3D7_1455700	0.742
PF3D7_0217500	PF3D7_1022700	0.837
PF3D7_0705700	PF3D7_1323100	0.999
PF3D7_0707900	PF3D7_1352200	0.818
PF3D7_0206200	PF3D7_1252100	0.747
PF3D7_1130200	PF3D7_1465900	0.999
PF3D7_1028700	PF3D7_1133400	0.941
PF3D7_0607700	PF3D7_0815500	0.72
PF3D7_0412100	PF3D7_1004000	0.912
PF3D7_0605800	PF3D7_1107400	0.98
PF3D7_1146900	PF3D7_1472100	0.963
PF3D7_0316200	PF3D7_0718100	0.716
PF3D7_0925300	PF3D7_1355100	0.733
PF3D7_1235200	PF3D7_1406800	0.889
PF3D7_0920500	PF3D7_1023000	0.751
PF3D7_1123900	PF3D7_1308300	0.857
PF3D7_1027100	PF3D7_1463400	0.716
PF3D7_1143300	PF3D7_1358800	0.897
PF3D7_0210000	PF3D7_1124900	0.989
PF3D7_0102200	PF3D7_1134000	0.793
PF3D7_0705700	PF3D7_1443300	0.745
PF3D7_1122900	PF3D7_1246200	0.82
PF3D7_1331800	PF3D7_1421200	0.999
PF3D7_1149600	PF3D7_1223400	0.704
PF3D7_1231600	PF3D7_1342700	0.9
PF3D7_0303300	PF3D7_1206600	0.983
PF3D7_1107700	PF3D7_1415800	0.743
PF3D7_0411900	PF3D7_1015800	0.923
PF3D7_1317800	PF3D7_1342000	0.999
PF3D7_0610400	PF3D7_1329300	0.834
PF3D7_0524700	PF3D7_1353700	0.792
PF3D7_0921800	PF3D7_1445900	0.803
PF3D7_0523800	PF3D7_1223700	0.715
PF3D7_0716100	PF3D7_0801500	0.999
PF3D7_1012600	PF3D7_1464900	0.783
PF3D7_0404900	PF3D7_1031800	0.735
PF3D7_0828500	PF3D7_1326400	0.999
PF3D7_0217100	PF3D7_0615500	0.749
PF3D7_0519400	PF3D7_0710600	0.996
PF3D7_0624600	PF3D7_1224500	0.75
PF3D7_1107700	PF3D7_1405800	0.999
PF3D7_0513300	PF3D7_1229400	0.849
PF3D7_0527000	PF3D7_1438700	0.817
PF3D7_0605800	PF3D7_1130700	0.98
PF3D7_0208500	PF3D7_0933600	0.765
PF3D7_0403700	PF3D7_0518500	0.841
PF3D7_0503800	PF3D7_1460700	0.999
PF3D7_0810300	PF3D7_1235200	0.769
PF3D7_0508900	PF3D7_1227600	0.736
PF3D7_0924500	PF3D7_1227000	0.742
PF3D7_1227500	PF3D7_1239200	0.791
PF3D7_1020700	PF3D7_1251500	0.92
PF3D7_0626800	PF3D7_1143300	0.934
PF3D7_0306800	PF3D7_1242700	0.813
PF3D7_0831600	PF3D7_1315300	0.755
PF3D7_1027400	PF3D7_1211300	0.9
PF3D7_1302700	PF3D7_1407100	0.93
PF3D7_0319600	PF3D7_1351400	0.76
PF3D7_0716100	PF3D7_1133700	0.744
PF3D7_1423100	PF3D7_1452000	0.738
PF3D7_0916000	PF3D7_1013800	0.762
PF3D7_0903200	PF3D7_1242800	0.973
PF3D7_0425800	PF3D7_0808700	0.797
PF3D7_0320900	PF3D7_1203000	0.735
PF3D7_1345500	PF3D7_1405700	0.716
PF3D7_1354300	PF3D7_1408200	0.703
PF3D7_1353100	PF3D7_1477500	0.753
PF3D7_1206600	PF3D7_1410200	0.987
PF3D7_0501300	PF3D7_1001400	0.868
PF3D7_0612900	PF3D7_0814300	0.895
PF3D7_1452000	PF3D7_1459900	0.89
PF3D7_0715300	PF3D7_1364100	0.871
PF3D7_1302000	PF3D7_1370300	0.87
PF3D7_0907500	PF3D7_0932000	0.708
PF3D7_0621800	PF3D7_1351400	0.893
PF3D7_0422400	PF3D7_0814000	0.999
PF3D7_1035500	PF3D7_1036000	0.989
PF3D7_0102900	PF3D7_1323400	0.724
PF3D7_0217100	PF3D7_0715500	0.752
PF3D7_0111300	PF3D7_1234300	0.942
PF3D7_0504400	PF3D7_0505500	0.768
PF3D7_0728800	PF3D7_0919600	0.771
PF3D7_0209200	PF3D7_0720000	0.964
PF3D7_0502400	PF3D7_1436300	0.738
PF3D7_0818400	PF3D7_1404500	0.783
PF3D7_0705700	PF3D7_1426100	0.804
PF3D7_0609800	PF3D7_0722200	0.738
PF3D7_1031800	PF3D7_1224100	0.741
PF3D7_0209600	PF3D7_1436600	0.783
PF3D7_0214200	PF3D7_1126200	0.982
PF3D7_0108700	PF3D7_1236100	0.944
PF3D7_0802600	PF3D7_1136200	0.918
PF3D7_1424100	PF3D7_1445700	0.757
PF3D7_1028700	PF3D7_1335100	0.922
PF3D7_0424500	PF3D7_1016700	0.705
PF3D7_0319600	PF3D7_1443300	0.861
PF3D7_1013100	PF3D7_1224400	0.998
PF3D7_1145500	PF3D7_1209900	0.924
PF3D7_0110800	PF3D7_0933000	0.909
PF3D7_0503800	PF3D7_1309100	0.999
PF3D7_0502800	PF3D7_1344200	0.748
PF3D7_0203200	PF3D7_0525300	0.829
PF3D7_0217100	PF3D7_0709100	0.743
PF3D7_0917300	PF3D7_1345600	0.714
PF3D7_0716200	PF3D7_1301700	0.755
PF3D7_0306400	PF3D7_1319400	0.702
PF3D7_0109000	PF3D7_1459900	0.793
PF3D7_1144000	PF3D7_1357000	0.836
PF3D7_1430200	PF3D7_1472600	0.823
PF3D7_1130200	PF3D7_1341200	0.999
PF3D7_1302000	PF3D7_1354300	0.828
PF3D7_0708800	PF3D7_1413900	0.825
PF3D7_0729300	PF3D7_1456300	0.716
PF3D7_0422400	PF3D7_1433600	0.9
PF3D7_0322500	PF3D7_1435300	0.764
PF3D7_0611700	PF3D7_1312900	0.9
PF3D7_0322900	PF3D7_1206200	0.935
PF3D7_0312400	PF3D7_1317100	0.733
PF3D7_0610900	PF3D7_1426200	0.818
PF3D7_0508500	PF3D7_1252100	0.766
PF3D7_0313500	PF3D7_1227900	0.722
PF3D7_0934000	PF3D7_1126000	0.904
PF3D7_1211800	PF3D7_1462800	0.819
PF3D7_1028700	PF3D7_1031200	0.837
PF3D7_0525800	PF3D7_0805200	0.926
PF3D7_0214600	PF3D7_1246400	0.855
PF3D7_0628100	PF3D7_1009700	0.87
PF3D7_1013800	PF3D7_1028700	0.716
PF3D7_0723300	PF3D7_1469200	0.754
PF3D7_0628100	PF3D7_1410400	0.87
PF3D7_1361800	PF3D7_1459900	0.705
PF3D7_1017900	PF3D7_1368100	0.999
PF3D7_0613900	PF3D7_1017100	0.713
PF3D7_1105600	PF3D7_1407900	0.73
PF3D7_0719400	PF3D7_0805700	0.865
PF3D7_1224500	PF3D7_1417800	0.861
PF3D7_0721600	PF3D7_1132700	0.983
PF3D7_0423300	PF3D7_0507200	0.793
PF3D7_0423500	PF3D7_1356300	0.769
PF3D7_0507100	PF3D7_0519100	0.997
PF3D7_0305000	PF3D7_0317600	0.724
PF3D7_0306900	PF3D7_0719700	0.999
PF3D7_1130200	PF3D7_1309100	0.999
PF3D7_1137100	PF3D7_1461300	0.854
PF3D7_0316800	PF3D7_1424400	0.997
PF3D7_0408500	PF3D7_1455700	0.802
PF3D7_0605000	PF3D7_0719600	0.999
PF3D7_0503800	PF3D7_0519100	0.991
PF3D7_0303200	PF3D7_0932200	0.735
PF3D7_0910900	PF3D7_1438700	0.999
PF3D7_0912900	PF3D7_1033700	0.921
PF3D7_0913000	PF3D7_1142600	0.744
PF3D7_0921200	PF3D7_1126500	0.721
PF3D7_0503200	PF3D7_0724600	0.744
PF3D7_1414000	PF3D7_1464700	0.835
PF3D7_1233900	PF3D7_1360700	0.812
PF3D7_1021500	PF3D7_1223300	0.838
PF3D7_1125700	PF3D7_1335300	0.881
PF3D7_0907700	PF3D7_0912900	0.952
PF3D7_0705300	PF3D7_0811900	0.709
PF3D7_0819100	PF3D7_0921200	0.739
PF3D7_0709100	PF3D7_0811900	0.723
PF3D7_1010600	PF3D7_1308300	0.965
PF3D7_0813100	PF3D7_1321500.2	0.772
PF3D7_1325400	PF3D7_1356100	0.87
PF3D7_0522400	PF3D7_0523200	0.742
PF3D7_0220100	PF3D7_1431300	0.775
PF3D7_1353900	PF3D7_1414000	0.863
PF3D7_0105300	PF3D7_0717500	0.789
PF3D7_0518500	PF3D7_1474500	0.739
PF3D7_0818200	PF3D7_1443000	0.922
PF3D7_1314900	PF3D7_1324500	0.834
PF3D7_0926700	PF3D7_1453500	0.97
PF3D7_0305600	PF3D7_0307600	0.727
PF3D7_0522500	PF3D7_0705700	0.899
PF3D7_0909800	PF3D7_1213700	0.922
PF3D7_0412100	PF3D7_0503800	0.713
PF3D7_0302500	PF3D7_1125800	0.751
PF3D7_0318200	PF3D7_1211300	0.922
PF3D7_1302700	PF3D7_1415200	0.955
PF3D7_0510500	PF3D7_1449700	0.751
PF3D7_0307600	PF3D7_0705300	0.729
PF3D7_0707900	PF3D7_1357700	0.751
PF3D7_0607000	PF3D7_1123400	0.753
PF3D7_1251200	PF3D7_1361800	0.87
PF3D7_0305600	PF3D7_1331300	0.788
PF3D7_0302200	PF3D7_0628100	0.87
PF3D7_1332000	PF3D7_1412700	0.808
PF3D7_1362200	PF3D7_1412500	0.885
PF3D7_1211700	PF3D7_1443000	0.759
PF3D7_0502400	PF3D7_0621300	0.75
PF3D7_0308100	PF3D7_1017100	0.875
PF3D7_0704500	PF3D7_1439000	0.702
PF3D7_0726300	PF3D7_0918600	0.865
PF3D7_0611200	PF3D7_0916500	0.73
PF3D7_0501100.2	PF3D7_1401100	0.784
PF3D7_1037100	PF3D7_1124500	0.977
PF3D7_0722600	PF3D7_1448000	0.996
PF3D7_0506100	PF3D7_1358800	0.787
PF3D7_0821700	PF3D7_1204300	0.798
PF3D7_0904400	PF3D7_1027800	0.9
PF3D7_0424700	PF3D7_1301700	0.824
PF3D7_0405200	PF3D7_1236900	0.797
PF3D7_0307100	PF3D7_0611700	0.997
PF3D7_1144000	PF3D7_1206700	0.912
PF3D7_0213500	PF3D7_0708400	0.986
PF3D7_0619900	PF3D7_1367100	0.78
PF3D7_1027100	PF3D7_1415800	0.857
PF3D7_0503400	PF3D7_1323700	0.756
PF3D7_0801500	PF3D7_1319300	0.802
PF3D7_0818700	PF3D7_0829200	0.733
PF3D7_1310800	PF3D7_1426800	0.703
PF3D7_0517000	PF3D7_1123400	0.937
PF3D7_0311300	PF3D7_1446600	0.712
PF3D7_0813900	PF3D7_1338200	0.999
PF3D7_0719700	PF3D7_1341300	0.989
PF3D7_0207700	PF3D7_0903300	0.777
PF3D7_0205900	PF3D7_1117100	0.983
PF3D7_0419700	PF3D7_0507200	0.714
PF3D7_0316800	PF3D7_0725200	0.904
PF3D7_0919600	PF3D7_1346100	0.923
PF3D7_0508000	PF3D7_1206000	0.729
PF3D7_0704100	PF3D7_0803200	0.885
PF3D7_0308900	PF3D7_0317700	0.791
PF3D7_0821000	PF3D7_1132800	0.702
PF3D7_0413600	PF3D7_1402300	0.999
PF3D7_0318200	PF3D7_0509400	0.734
PF3D7_0417200	PF3D7_1332900	0.814
PF3D7_0503800	PF3D7_1308300	0.999
PF3D7_0501300	PF3D7_1001900	0.837
PF3D7_0813900	PF3D7_1216300	0.916
PF3D7_1001500	PF3D7_1133700	0.745
PF3D7_0803200	PF3D7_1236900	0.775
PF3D7_0817800	PF3D7_1143200	0.732
PF3D7_0516200	PF3D7_1415800	0.812
PF3D7_1302800	PF3D7_1421200	0.999
PF3D7_0615500	PF3D7_1033700	0.808
PF3D7_1005100	PF3D7_1367600	0.708
PF3D7_0422400	PF3D7_1451100	0.99
PF3D7_0106700	PF3D7_0821500	0.986
PF3D7_1217300	PF3D7_1433500	0.791
PF3D7_0611700	PF3D7_0813900	0.999
PF3D7_1008000	PF3D7_1033700	0.968
PF3D7_0505500	PF3D7_1226600	0.986
PF3D7_0507200	PF3D7_1027300	0.707
PF3D7_0710600	PF3D7_1358800	0.998
PF3D7_0506100	PF3D7_0827100	0.733
PF3D7_0409400	PF3D7_0818900	0.94
PF3D7_0412100	PF3D7_1447000	0.987
PF3D7_0628100	PF3D7_1035700	0.87
PF3D7_0412100	PF3D7_1132700	0.981
PF3D7_0217800	PF3D7_1302800	0.999
PF3D7_1322200	PF3D7_1406600	0.703
PF3D7_1355100	PF3D7_1405600	0.72
PF3D7_0813100	PF3D7_1031400.2	0.887
PF3D7_1111100	PF3D7_1211700	0.793
PF3D7_0207600	PF3D7_1323700	0.91
PF3D7_0319600	PF3D7_1026800	0.712
PF3D7_0416500	PF3D7_1224100	0.719
PF3D7_0807900	PF3D7_1336900	0.961
PF3D7_0821700	PF3D7_1223900	0.855
PF3D7_0715600	PF3D7_1137500	0.733
PF3D7_1223900	PF3D7_1323100	0.999
PF3D7_0820000	PF3D7_1421400	0.92
PF3D7_0813100	PF3D7_0831600	0.751
PF3D7_1447000	PF3D7_1450100	0.939
PF3D7_1308300	PF3D7_1413400	0.823
PF3D7_0301600	PF3D7_1206600	0.701
PF3D7_0217500	PF3D7_0508500	0.747
PF3D7_1143400	PF3D7_1224300	0.925
PF3D7_0306800	PF3D7_1441200	0.709
PF3D7_0920800	PF3D7_1411900	0.756
PF3D7_0212300	PF3D7_1431700	0.967
PF3D7_0723300	PF3D7_0929400	0.767
PF3D7_0618300	PF3D7_1309100	0.999
PF3D7_1130700	PF3D7_1361900	0.87
PF3D7_0821300	PF3D7_1008900	0.9
PF3D7_1003800	PF3D7_1350100	0.702
PF3D7_1129200	PF3D7_1402300	0.999
PF3D7_0308600	PF3D7_1231600	0.981
PF3D7_0505800	PF3D7_1105000	0.701
PF3D7_0308900	PF3D7_1234800	0.999
PF3D7_1323700	PF3D7_1346900	0.733
PF3D7_0319300	PF3D7_0916500	0.776
PF3D7_0217500	PF3D7_1019900	0.81
PF3D7_0807800	PF3D7_1353800	0.999
PF3D7_0805700	PF3D7_1456000	0.857
PF3D7_0831600	PF3D7_1003100	0.749
PF3D7_1005100	PF3D7_1217200	0.849
PF3D7_0524000	PF3D7_1241800	0.766
PF3D7_1110200	PF3D7_1124400	0.833
PF3D7_1004000	PF3D7_1461200	0.97
PF3D7_0903900	PF3D7_1414300	0.999
PF3D7_0802000	PF3D7_1354500	0.891
PF3D7_0731500	PF3D7_1301600	0.902
PF3D7_1306200	PF3D7_1456000	0.762
PF3D7_1245400	PF3D7_1310000	0.805
PF3D7_0105300	PF3D7_1318000	0.702
PF3D7_0810400	PF3D7_1242700	0.724
PF3D7_0217100	PF3D7_1036800	0.702
PF3D7_1116100	PF3D7_1344300	0.803
PF3D7_1123900	PF3D7_1448000	0.831
PF3D7_0725200	PF3D7_1130200	0.925
PF3D7_0310400	PF3D7_1220300	0.716
PF3D7_0415900	PF3D7_0810600	0.807
PF3D7_1104000	PF3D7_1349200	0.893
PF3D7_0718100	PF3D7_1303800	0.892
PF3D7_0419700	PF3D7_1459900	0.731
PF3D7_1137500	PF3D7_1317100	0.725
PF3D7_0207600	PF3D7_1027300	0.734
PF3D7_0522700	PF3D7_1435300	0.743
PF3D7_1012200	PF3D7_1452000	0.893
PF3D7_0918800	PF3D7_1344900	0.731
PF3D7_0624000	PF3D7_1444800	0.932
PF3D7_0807800	PF3D7_0826500	0.984
PF3D7_1146600	PF3D7_1452000	0.853
PF3D7_0210600	PF3D7_0919200	0.906
PF3D7_0105300	PF3D7_0905500	0.836
PF3D7_1004000	PF3D7_1206600	0.792
PF3D7_1213800	PF3D7_1229500	0.732
PF3D7_1308200	PF3D7_1410200	0.957
PF3D7_0715600	PF3D7_1117100	0.733
PF3D7_1407100	PF3D7_1451900	0.859
PF3D7_1224400	PF3D7_1322100	0.749
PF3D7_0824700	PF3D7_1214100	0.767
PF3D7_0103200	PF3D7_1012400	0.762
PF3D7_1226700	PF3D7_1332700	0.939
PF3D7_1213900	PF3D7_1227800	0.77
PF3D7_0626800	PF3D7_1364800	0.9
PF3D7_1105600	PF3D7_1436300	0.988
PF3D7_1232100	PF3D7_1443900	0.971
PF3D7_0302500	PF3D7_1351700	0.83
PF3D7_0109800	PF3D7_0208500	0.706
PF3D7_0419400	PF3D7_1012200	0.716
PF3D7_1013800	PF3D7_1335100	0.792
PF3D7_0516200	PF3D7_0903900	0.999
PF3D7_1224100	PF3D7_1436600	0.723
PF3D7_0630900	PF3D7_1302000	0.769
PF3D7_1229500	PF3D7_1402500	0.731
PF3D7_1252100	PF3D7_1321500.2	0.894
PF3D7_0501600	PF3D7_1133400	0.906
PF3D7_0501000	PF3D7_0719600	0.733
PF3D7_1034900	PF3D7_1249900	0.701
PF3D7_0605000	PF3D7_1103100	0.717
PF3D7_1414300	PF3D7_1461200	0.991
PF3D7_0820200	PF3D7_1124600	0.913
PF3D7_1218600	PF3D7_1410200	0.809
PF3D7_0207600	PF3D7_1107100	0.756
PF3D7_0704300	PF3D7_0704500	0.895
PF3D7_0630900	PF3D7_1448000	0.832
PF3D7_1221700	PF3D7_1341900	0.728
PF3D7_0410700	PF3D7_1471400	0.728
PF3D7_0727200	PF3D7_0819100	0.844
PF3D7_0802800	PF3D7_0813100	0.913
PF3D7_0110400	PF3D7_1431800	0.9
PF3D7_1133200	PF3D7_1356100	0.701
PF3D7_0802200	PF3D7_1345100	0.881
PF3D7_0821500	PF3D7_1146000	0.755
PF3D7_0317500	PF3D7_0416300	0.858
PF3D7_0630900	PF3D7_0921800	0.899
PF3D7_1228600	PF3D7_1322500	0.762
PF3D7_0707900	PF3D7_1426000	0.87
PF3D7_0210200	PF3D7_1013600	0.735
PF3D7_1235900	PF3D7_1320900	0.994
PF3D7_0927300	PF3D7_1022500	0.991
PF3D7_1434300	PF3D7_1447000	0.756
PF3D7_1214100	PF3D7_1341600	0.878
PF3D7_1215200	PF3D7_1412300	0.91
PF3D7_1439600	PF3D7_1452000	0.719
PF3D7_1224400	PF3D7_1404500	0.92
PF3D7_0927300	PF3D7_1143200	0.714
PF3D7_0807800	PF3D7_0931800	0.999
PF3D7_0301600	PF3D7_1012600	0.798
PF3D7_0308900	PF3D7_1246600	0.987
PF3D7_0509400	PF3D7_1367600	0.879
PF3D7_0308900	PF3D7_0924700	0.982
PF3D7_0422700	PF3D7_0614500	0.917
PF3D7_0729400	PF3D7_1129400	0.997
PF3D7_0804500	PF3D7_1303800	0.728
PF3D7_0404900	PF3D7_0613800	0.713
PF3D7_0219200	PF3D7_1433600	0.916
PF3D7_0716800	PF3D7_1358800	0.942
PF3D7_0706000	PF3D7_1211800	0.759
PF3D7_1018000	PF3D7_1037000	0.956
PF3D7_0507100	PF3D7_1129400	0.884
PF3D7_1125700	PF3D7_1436600	0.723
PF3D7_0708400	PF3D7_1324900	0.834
PF3D7_0409100	PF3D7_0729400	0.757
PF3D7_0822300	PF3D7_0829300	0.903
PF3D7_1355100	PF3D7_1368800	0.763
PF3D7_0203700	PF3D7_1206600	0.727
PF3D7_0830600	PF3D7_1120400	0.747
PF3D7_1245400	PF3D7_1447000	0.997
PF3D7_1013100	PF3D7_1107700	0.9
PF3D7_1311900	PF3D7_1405600	0.872
PF3D7_1031800	PF3D7_1133300	0.721
PF3D7_1306900	PF3D7_1414800	0.922
PF3D7_0308900	PF3D7_1308200	0.779
PF3D7_0514100	PF3D7_1367000	0.892
PF3D7_1236900	PF3D7_1437300	0.861
PF3D7_1232500	PF3D7_1459900	0.794
PF3D7_0419800	PF3D7_0826700	0.744
PF3D7_0422700	PF3D7_1342000	0.936
PF3D7_0605000	PF3D7_1451100	0.928
PF3D7_0903300	PF3D7_1458300	0.737
PF3D7_0417200	PF3D7_0708800	0.818
PF3D7_0909800	PF3D7_1414800	0.999
PF3D7_1421200	PF3D7_1431700	0.993
PF3D7_0419800	PF3D7_1431700	0.701
PF3D7_0716100	PF3D7_1251500	0.971
PF3D7_0501500	PF3D7_1238000	0.827
PF3D7_0106700	PF3D7_1028300	0.903
PF3D7_0717500	PF3D7_1409400	0.841
PF3D7_0501500	PF3D7_1472600	0.901
PF3D7_0303000	PF3D7_1017900	0.916
PF3D7_0320900	PF3D7_0817900	0.837
PF3D7_0407800	PF3D7_1036000	0.836
PF3D7_0612200	PF3D7_1410400	0.724
PF3D7_1034200	PF3D7_1424100	0.832
PF3D7_0811500	PF3D7_1428300	0.779
PF3D7_1312600	PF3D7_1419800.2	0.908
PF3D7_0725400	PF3D7_0919300	0.779
PF3D7_1329000	PF3D7_1415200	0.986
PF3D7_1211700	PF3D7_1355100	0.999
PF3D7_0934000	PF3D7_1305300	0.922
PF3D7_1335300	PF3D7_1342600	0.857
PF3D7_0111500	PF3D7_1405600	0.974
PF3D7_0704100	PF3D7_1223100	0.837
PF3D7_0405700	PF3D7_0510200	0.723
PF3D7_0619400	PF3D7_1113400	0.756
PF3D7_0613400	PF3D7_1130200	0.993
PF3D7_0403800	PF3D7_1125800	0.851
PF3D7_1211800	PF3D7_1426000	0.878
PF3D7_0630300	PF3D7_1428900	0.846
PF3D7_1034900	PF3D7_1415800	0.711
PF3D7_1019900	PF3D7_1223100	0.753
PF3D7_0826700	PF3D7_1137500	0.768
PF3D7_0302200	PF3D7_1235200	0.755
PF3D7_0920800	PF3D7_1215000	0.786
PF3D7_0614500	PF3D7_1137500	0.832
PF3D7_1149600	PF3D7_1344200	0.884
PF3D7_0318200	PF3D7_1241800	0.926
PF3D7_1149000	PF3D7_1201000	0.714
PF3D7_0508900	PF3D7_0806300	0.714
PF3D7_0719700	PF3D7_1308300	0.999
PF3D7_0425800	PF3D7_1240900	0.83
PF3D7_0108600	PF3D7_0920100	0.716
PF3D7_1231600	PF3D7_1443800	0.957
PF3D7_0920500	PF3D7_1316200	0.879
PF3D7_0618500	PF3D7_1034400	0.921
PF3D7_0302200	PF3D7_0929400	0.971
PF3D7_1221900	PF3D7_1473900	0.898
PF3D7_0919200	PF3D7_1301600	0.893
PF3D7_1118200	PF3D7_1352900	0.73
PF3D7_1132700	PF3D7_1365900	0.998
PF3D7_1125700	PF3D7_1461400	0.888
PF3D7_0721600	PF3D7_1134700	0.9
PF3D7_1009600	PF3D7_1455000	0.822
PF3D7_0817700	PF3D7_1251200	0.88
PF3D7_0510100	PF3D7_1328000	0.705
PF3D7_1130200	PF3D7_1404500	0.865
PF3D7_0404900	PF3D7_1140400	0.751
PF3D7_1012600	PF3D7_1137100	0.864
PF3D7_0505000	PF3D7_1126500	0.703
PF3D7_0925200	PF3D7_0931100	0.885
PF3D7_0621800	PF3D7_1126200	0.788
PF3D7_0508900	PF3D7_0531100	0.803
PF3D7_1228600	PF3D7_1410400	0.931
PF3D7_0110700	PF3D7_1333700	0.917
PF3D7_1316500	PF3D7_1468800	0.82
PF3D7_1228600	PF3D7_1439400	0.701
PF3D7_0628100	PF3D7_0831600	0.87
PF3D7_0315100	PF3D7_1430100	0.809
PF3D7_1246400	PF3D7_1335300	0.701
PF3D7_0612900	PF3D7_1027100	0.701
PF3D7_1214100	PF3D7_1361700	0.756
PF3D7_1227400	PF3D7_1232900	0.761
PF3D7_0814000	PF3D7_1308300	0.998
PF3D7_1251200	PF3D7_1310700	0.968
PF3D7_1206600	PF3D7_1461200	0.844
PF3D7_0212600	PF3D7_0818100	0.766
PF3D7_0621300	PF3D7_1208100	0.718
PF3D7_1105400	PF3D7_1433600	0.9
PF3D7_1226100	PF3D7_1436000	0.747
PF3D7_0414000	PF3D7_0705400	0.704
PF3D7_1027800	PF3D7_1434600	0.707
PF3D7_0626800	PF3D7_1446400	0.975
PF3D7_0416500	PF3D7_1325400	0.848
PF3D7_1109400	PF3D7_1302600	0.754
PF3D7_0212900	PF3D7_1343100	0.787
PF3D7_0312800	PF3D7_0706400	0.999
PF3D7_0205500	PF3D7_1410200	0.925
PF3D7_0607000	PF3D7_1426000	0.913
PF3D7_0302000	PF3D7_1247900	0.817
PF3D7_1022500	PF3D7_1211800	0.746
PF3D7_0607700	PF3D7_1029900	0.87
PF3D7_0813900	PF3D7_1474100	0.8
PF3D7_0504200	PF3D7_1008900	0.902
PF3D7_0525100	PF3D7_1253400	0.915
PF3D7_0802600	PF3D7_1452000	0.917
PF3D7_0528400	PF3D7_1316200	0.708
PF3D7_0108000	PF3D7_0205900	0.996
PF3D7_0302200	PF3D7_0930300	0.9
PF3D7_0214200	PF3D7_0506100	0.803
PF3D7_1211800	PF3D7_1361100	0.731
PF3D7_1134700	PF3D7_1407100	0.898
PF3D7_0417200	PF3D7_1012600	0.835
PF3D7_0934000	PF3D7_1216000	0.81
PF3D7_1032400	PF3D7_1128700	0.817
PF3D7_0719600	PF3D7_0813900	0.999
PF3D7_1005700	PF3D7_1136800	0.762
PF3D7_0508100	PF3D7_0929400	0.862
PF3D7_0308200	PF3D7_1215300	0.998
PF3D7_0617100	PF3D7_0905900	0.769
PF3D7_0115700	PF3D7_1219300	0.723
PF3D7_1020700	PF3D7_1358100	0.74
PF3D7_1120100	PF3D7_1444800	0.957
PF3D7_1033700	PF3D7_1129200	0.818
PF3D7_0517700	PF3D7_1107300	0.975
PF3D7_0724600	PF3D7_1448500	0.774
PF3D7_0630300	PF3D7_1001600	0.733
PF3D7_0308900	PF3D7_1213700	0.914
PF3D7_0208300	PF3D7_0703900	0.704
PF3D7_0918300	PF3D7_1144500	0.703
PF3D7_0210600	PF3D7_0414900	0.956
PF3D7_0319600	PF3D7_1103100	0.779
PF3D7_0905400	PF3D7_0930300	0.95
PF3D7_0917600	PF3D7_0922700	0.884
PF3D7_0319600	PF3D7_1414300	0.74
PF3D7_0209600	PF3D7_1437300	0.754
PF3D7_0706400	PF3D7_1357100	0.913
PF3D7_0930300	PF3D7_1461400	0.841
PF3D7_1133400	PF3D7_1301600	0.946
PF3D7_1032400	PF3D7_1227600	0.768
PF3D7_1004000	PF3D7_1346100	0.787
PF3D7_0718100	PF3D7_0904900	0.723
PF3D7_0207700	PF3D7_0407800	0.722
PF3D7_1003100	PF3D7_1031400.2	0.844
PF3D7_0409400	PF3D7_0617000	0.873
PF3D7_0409400	PF3D7_1329000	0.845
PF3D7_1129200	PF3D7_1203000	0.921
PF3D7_0705400	PF3D7_1331600	0.706
PF3D7_0417200	PF3D7_0816100	0.915
PF3D7_0208200	PF3D7_1129400	0.876
PF3D7_0105800	PF3D7_1121900	0.708
PF3D7_0932800	PF3D7_1117700	0.981
PF3D7_1405600	PF3D7_1431800	0.912
PF3D7_1133200	PF3D7_1325900	0.759
PF3D7_1222700	PF3D7_1310700	0.905
PF3D7_1109900	PF3D7_1451100	0.961
PF3D7_1138500	PF3D7_1431500	0.812
PF3D7_0518300	PF3D7_1368100	0.999
PF3D7_0501600	PF3D7_0802800	0.914
PF3D7_0318600	PF3D7_0625600	0.759
PF3D7_0404900	PF3D7_1410400	0.825
PF3D7_1320400	PF3D7_1331300	0.742
PF3D7_1223100	PF3D7_1356100	0.868
PF3D7_0524000	PF3D7_0706000	0.856
PF3D7_0707400	PF3D7_0908600	0.758
PF3D7_0904800	PF3D7_1107400	0.963
PF3D7_1212000	PF3D7_1419800.2	0.959
PF3D7_0303300	PF3D7_1329000	0.987
PF3D7_0407800	PF3D7_1206000	0.848
PF3D7_1028200	PF3D7_1235600	0.717
PF3D7_0705700	PF3D7_1130100	0.999
PF3D7_0507700	PF3D7_0904600	0.731
PF3D7_0206000	PF3D7_1117800	0.856
PF3D7_0521700	PF3D7_1433500	0.825
PF3D7_1317800	PF3D7_1468700	0.956
PF3D7_0818100	PF3D7_1125800	0.976
PF3D7_1307600	PF3D7_1364800	0.765
PF3D7_0626800	PF3D7_1307300	0.913
PF3D7_1406800	PF3D7_1452000	0.896
PF3D7_1235700	PF3D7_1320800	0.835
PF3D7_1243100	PF3D7_1343900	0.95
PF3D7_1009900	PF3D7_1244700	0.81
PF3D7_0501500	PF3D7_0932200	0.875
PF3D7_1231500	PF3D7_1414800	0.995
PF3D7_0615500	PF3D7_1417800	0.963
PF3D7_1008700	PF3D7_1020300	0.835
PF3D7_1108700	PF3D7_1344200	0.933
PF3D7_0915000	PF3D7_0918000	0.719
PF3D7_1246800	PF3D7_1317800	0.9
PF3D7_0321400	PF3D7_0507400	0.71
PF3D7_0930400.2	PF3D7_1357700	0.703
PF3D7_0103800	PF3D7_1145400	0.824
PF3D7_1317100	PF3D7_1331300	0.757
PF3D7_0509400	PF3D7_1237600	0.805
PF3D7_0615500	PF3D7_0803400	0.819
PF3D7_0219600	PF3D7_1438700	0.929
PF3D7_1226600	PF3D7_1427500	0.979
PF3D7_0611600	PF3D7_0934800	0.87
PF3D7_1240100	PF3D7_1342600	0.702
PF3D7_0318200	PF3D7_0826300	0.746
PF3D7_0821700	PF3D7_1441200	0.999
PF3D7_0712400	PF3D7_1240600	0.823
PF3D7_0322900	PF3D7_1426000	0.999
PF3D7_0508000	PF3D7_0805700	0.847
PF3D7_0705400	PF3D7_1111100	0.799
PF3D7_0302200	PF3D7_0423500	0.901
PF3D7_1027100	PF3D7_1407100	0.991
PF3D7_0705300	PF3D7_1211700	0.999
PF3D7_1004000	PF3D7_1123400	0.942
PF3D7_0520000	PF3D7_1413400	0.961
PF3D7_1367600	PF3D7_1415800	0.978
PF3D7_0302200	PF3D7_0507200	0.787
PF3D7_0630500	PF3D7_0912800	0.955
PF3D7_0609800	PF3D7_0831600	0.754
PF3D7_0820000	PF3D7_1415200	0.919
PF3D7_0623800	PF3D7_1009600	0.718
PF3D7_0421300	PF3D7_0425800	0.897
PF3D7_1414300	PF3D7_1474100	0.884
PF3D7_0210000	PF3D7_0217800	0.956
PF3D7_0108600	PF3D7_1211400	0.749
PF3D7_0801500	PF3D7_1241800	0.899
PF3D7_1140400	PF3D7_1455300	0.753
PF3D7_0932200	PF3D7_1132800	0.706
PF3D7_1105400	PF3D7_1365900	0.999
PF3D7_0926100	PF3D7_1360500	0.782
PF3D7_1123900	PF3D7_1242700	0.937
PF3D7_1119600	PF3D7_1354300	0.746
PF3D7_0411900	PF3D7_1448500	0.726
PF3D7_1218000	PF3D7_1342600	0.897
PF3D7_0215700	PF3D7_0613400	0.864
PF3D7_0913900	PF3D7_1332900	0.811
PF3D7_0707900	PF3D7_1124800	0.842
PF3D7_0704500	PF3D7_0806300	0.847
PF3D7_0410700	PF3D7_1320700	0.776
PF3D7_1140900	PF3D7_1210700	0.729
PF3D7_0802300	PF3D7_1410200	0.756
PF3D7_0509000	PF3D7_1332000	0.993
PF3D7_0923000	PF3D7_1104200	0.931
PF3D7_0415900	PF3D7_1130200	0.999
PF3D7_0704300	PF3D7_0932100	0.865
PF3D7_1141800	PF3D7_1232500	0.77
PF3D7_0411400	PF3D7_0504200	0.775
PF3D7_0520600	PF3D7_1410200	0.972
PF3D7_1107100	PF3D7_1116100	0.745
PF3D7_0410700	PF3D7_1325400	0.848
PF3D7_1126200	PF3D7_1365900	0.999
PF3D7_0510100	PF3D7_1359600	0.827
PF3D7_0502400	PF3D7_1133700	0.71
PF3D7_0307400	PF3D7_0320700	0.766
PF3D7_1137500	PF3D7_1243600	0.75
PF3D7_1012600	PF3D7_1232200	0.778
PF3D7_0208200	PF3D7_1354300	0.888
PF3D7_1408600	PF3D7_1441200	0.999
PF3D7_0814200	PF3D7_1123900	0.915
PF3D7_0705700	PF3D7_1415800	0.747
PF3D7_0320900	PF3D7_0925700	0.949
PF3D7_0507100	PF3D7_1357000	0.738
PF3D7_0311300	PF3D7_1439400	0.773
PF3D7_1005000	PF3D7_1357200	0.909
PF3D7_0507200	PF3D7_1140400	0.729
PF3D7_0316800	PF3D7_0507100	0.999
PF3D7_0929400	PF3D7_1122700	0.872
PF3D7_0522700	PF3D7_1134000	0.719
PF3D7_0207700	PF3D7_1452000	0.703
PF3D7_0523200	PF3D7_0523800	0.723
PF3D7_1003800	PF3D7_1413400	0.788
PF3D7_1019500.2	PF3D7_1227600	0.761
PF3D7_0103600	PF3D7_0821300	0.866
PF3D7_0517000	PF3D7_0822600	0.766
PF3D7_0918300	PF3D7_1126200	0.96
PF3D7_1351400	PF3D7_1461200	0.992
PF3D7_1117700	PF3D7_1359300	0.816
PF3D7_0501600	PF3D7_1146600	0.747
PF3D7_0412000	PF3D7_1211700	0.825
PF3D7_0303400	PF3D7_1133300	0.705
PF3D7_0723300	PF3D7_0817700	0.789
PF3D7_1211800	PF3D7_1212700	0.883
PF3D7_1134700	PF3D7_1346100	0.872
PF3D7_0925300	PF3D7_1121900	0.743
PF3D7_0607000	PF3D7_1130200	0.955
PF3D7_0210000	PF3D7_1358800	0.945
PF3D7_0731200	PF3D7_1001900	0.723
PF3D7_0307100	PF3D7_1105400	0.999
PF3D7_0215700	PF3D7_1004300	0.868
PF3D7_0501100.2	PF3D7_0502400	0.76
PF3D7_0207500	PF3D7_1325900	0.767
PF3D7_1022700	PF3D7_1125700	0.754
PF3D7_0323600	PF3D7_1313900	0.833
PF3D7_0904700	PF3D7_1028600	0.748
PF3D7_0201700	PF3D7_0724400	0.704
PF3D7_0814200	PF3D7_1006200	0.795
PF3D7_1206200	PF3D7_1317800	0.951
PF3D7_0919400	PF3D7_1343100	0.743
PF3D7_0219700	PF3D7_1002100	0.874
PF3D7_0703600	PF3D7_1315300	0.752
PF3D7_0904900	PF3D7_1448500	0.798
PF3D7_0412100	PF3D7_0911700	0.781
PF3D7_1003800	PF3D7_1210000	0.934
PF3D7_0922400	PF3D7_1331700	0.718
PF3D7_1001200	PF3D7_1434800	0.768
PF3D7_0707900	PF3D7_1028400	0.996
PF3D7_1410400	PF3D7_1436600	0.892
PF3D7_1234600	PF3D7_1470800	0.703
PF3D7_0214900	PF3D7_0916000	0.883
PF3D7_1216300	PF3D7_1323400	0.923
PF3D7_0704800	PF3D7_1323700	0.797
PF3D7_0828200	PF3D7_1442300	0.91
PF3D7_0207600	PF3D7_1361800	0.894
PF3D7_0517000	PF3D7_1341300	0.999
PF3D7_0830600	PF3D7_1016800	0.901
PF3D7_0818400	PF3D7_1307100	0.861
PF3D7_0423300	PF3D7_1320700	0.778
PF3D7_0317600	PF3D7_0813900	0.999
PF3D7_0719500	PF3D7_1223400	0.757
PF3D7_1027800	PF3D7_1447000	0.999
PF3D7_1246800	PF3D7_1408600	0.9
PF3D7_0422400	PF3D7_1224300	0.918
PF3D7_0528200	PF3D7_0728000	0.95
PF3D7_0511000	PF3D7_1358800	0.911
PF3D7_0109000	PF3D7_0304100	0.921
PF3D7_0302000	PF3D7_0619900	0.72
PF3D7_0602400	PF3D7_0923000	0.9
PF3D7_0302500	PF3D7_0423300	0.892
PF3D7_0612200	PF3D7_1235200	0.739
PF3D7_0102200	PF3D7_1108700	0.712
PF3D7_1211300	PF3D7_1213700	0.9
PF3D7_0628800	PF3D7_1350100	0.794
PF3D7_1102700	PF3D7_1149600	0.816
PF3D7_0412400	PF3D7_0421100	0.818
PF3D7_1231600	PF3D7_1420000	0.95
PF3D7_0613900	PF3D7_1452000	0.899
PF3D7_1357100	PF3D7_1365900	0.933
PF3D7_0217100	PF3D7_1237700	0.872
PF3D7_0532600	PF3D7_1301400	0.748
PF3D7_0304100	PF3D7_0501500	0.896
PF3D7_0321400	PF3D7_1437300	0.862
PF3D7_0816600	PF3D7_0818900	0.986
PF3D7_1004000	PF3D7_1308300	0.991
PF3D7_1408100	PF3D7_1410600	0.775
PF3D7_0719700	PF3D7_0721600	0.999
PF3D7_1353800	PF3D7_1368100	0.999
PF3D7_0717700	PF3D7_1357200	0.839
PF3D7_0422400	PF3D7_1211800	0.884
PF3D7_1018000	PF3D7_1445200	0.766
PF3D7_0207600	PF3D7_0311300	0.796
PF3D7_0303000	PF3D7_1332000	0.952
PF3D7_0106700	PF3D7_1423000	0.779
PF3D7_0308900	PF3D7_1231500	0.985
PF3D7_0907600	PF3D7_1243600	0.703
PF3D7_0927800	PF3D7_1025600	0.816
PF3D7_0109800	PF3D7_1225100	0.867
PF3D7_0710900	PF3D7_1447000	0.969
PF3D7_1315300	PF3D7_1335100	0.749
PF3D7_0821700	PF3D7_1366600	0.911
PF3D7_0303300	PF3D7_0409600	0.717
PF3D7_0623500	PF3D7_1462800	0.754
PF3D7_1323400	PF3D7_1405800	0.724
PF3D7_1413400	PF3D7_1461300	0.853
PF3D7_0919900	PF3D7_1223100	0.796
PF3D7_0609800	PF3D7_1116100	0.87
PF3D7_0513800	PF3D7_0822600	0.754
PF3D7_1125500	PF3D7_1126900	0.999
PF3D7_1009700	PF3D7_1104900	0.906
PF3D7_0405000	PF3D7_0630500	0.92
PF3D7_0624600	PF3D7_0821300	0.728
PF3D7_0721300	PF3D7_1140700	0.728
PF3D7_0803500	PF3D7_1238900	0.769
PF3D7_1003500	PF3D7_1110600	0.972
PF3D7_0805700	PF3D7_1349300	0.738
PF3D7_1206600	PF3D7_1233000	0.886
PF3D7_0920800	PF3D7_1405600	0.772
PF3D7_0113900	PF3D7_1401400	0.72
PF3D7_0504900	PF3D7_1028600	0.709
PF3D7_0320300	PF3D7_1351400	0.792
PF3D7_0418600	PF3D7_1204900	0.849
PF3D7_1013100	PF3D7_1310800	0.869
PF3D7_0217500	PF3D7_1344300	0.768
PF3D7_1110700	PF3D7_1122900	0.781
PF3D7_0309200	PF3D7_0903700	0.752
PF3D7_1113300	PF3D7_1352500	0.745
PF3D7_1204900	PF3D7_1301600	0.772
PF3D7_0320900	PF3D7_1433500	0.942
PF3D7_0415600	PF3D7_1429900	0.9
PF3D7_1202500	PF3D7_1468800	0.913
PF3D7_0517300	PF3D7_1004400	0.946
PF3D7_0905400	PF3D7_1246200	0.889
PF3D7_1142600	PF3D7_1431700	0.999
PF3D7_0630900	PF3D7_1414700	0.724
PF3D7_0322000	PF3D7_1338300	0.913
PF3D7_1125500	PF3D7_1306900	0.8
PF3D7_1354300	PF3D7_1457700	0.705
PF3D7_0402100	PF3D7_1404800	0.89
PF3D7_1424400	PF3D7_1426000	0.999
PF3D7_0410700	PF3D7_0802600	0.764
PF3D7_1352200	PF3D7_1466700	0.89
PF3D7_0522800	PF3D7_0822300	0.801
PF3D7_0619900	PF3D7_1110200	0.993
PF3D7_0727200	PF3D7_1333200	0.767
PF3D7_0607700	PF3D7_0715200	0.87
PF3D7_0209600	PF3D7_1007200	0.781
PF3D7_0507100	PF3D7_1341200	0.999
PF3D7_0506100	PF3D7_1341300	0.936
PF3D7_0707900	PF3D7_1124900	0.888
PF3D7_0508000	PF3D7_1228600	0.906
PF3D7_1201200	PF3D7_1478800	0.78
PF3D7_1019400	PF3D7_1460700	0.999
PF3D7_0516200	PF3D7_1130200	0.998
PF3D7_0300100	PF3D7_0800300	0.802
PF3D7_0303300	PF3D7_1123900	0.972
PF3D7_0506100	PF3D7_0611700	0.956
PF3D7_0423500	PF3D7_1472600	0.9
PF3D7_0213100	PF3D7_1015600	0.731
PF3D7_1412500	PF3D7_1443900	0.902
PF3D7_0626800	PF3D7_1338300	0.721
PF3D7_0322900	PF3D7_0519400	0.999
PF3D7_1030100	PF3D7_1232400	0.712
PF3D7_1324500	PF3D7_1361900	0.971
PF3D7_1013700	PF3D7_1201800	0.779
PF3D7_0420100	PF3D7_1109400	0.993
PF3D7_0207700	PF3D7_0305600	0.729
PF3D7_0214400	PF3D7_1317900	0.79
PF3D7_0807100	PF3D7_0917600	0.818
PF3D7_1129000	PF3D7_1221200	0.723
PF3D7_1032400	PF3D7_1247300	0.75
PF3D7_0823300	PF3D7_1105100	0.831
PF3D7_0705700	PF3D7_1461200	0.984
PF3D7_0524000	PF3D7_1012600	0.705
PF3D7_0407800	PF3D7_1029900	0.899
PF3D7_0916000	PF3D7_1423100	0.799
PF3D7_0217800	PF3D7_1468700	0.973
PF3D7_0305600	PF3D7_1202200	0.764
PF3D7_0727200	PF3D7_0910800	0.784
PF3D7_1012600	PF3D7_1357800	0.957
PF3D7_1223900	PF3D7_1330600	0.766
PF3D7_1003800	PF3D7_1126000	0.702
PF3D7_0719300	PF3D7_0807000	0.815
PF3D7_0801800	PF3D7_1033400	0.801
PF3D7_0630300	PF3D7_1361900	0.991
PF3D7_0105300	PF3D7_1017100	0.713
PF3D7_0508500	PF3D7_1436600	0.724
PF3D7_1020000	PF3D7_1224300	0.845
PF3D7_0930300	PF3D7_1344300	0.798
PF3D7_0320300	PF3D7_1015900	0.741
PF3D7_1317100	PF3D7_1364100	0.866
PF3D7_1317800	PF3D7_1472700	0.913
PF3D7_1125400	PF3D7_1368600	0.898
PF3D7_0720100	PF3D7_1358100	0.892
PF3D7_0208200	PF3D7_1407100	0.99
PF3D7_0217500	PF3D7_0501500	0.915
PF3D7_1009700	PF3D7_1222700	0.8
PF3D7_0307200	PF3D7_0710900	0.945
PF3D7_0813900	PF3D7_1245400	0.924
PF3D7_0424600	PF3D7_1252900	0.77
PF3D7_1037100	PF3D7_1441400	0.768
PF3D7_1003500	PF3D7_1206600	0.898
PF3D7_0409300	PF3D7_1129400	0.78
PF3D7_1011400	PF3D7_1113400	0.752
PF3D7_0619400	PF3D7_0811000	0.726
PF3D7_0717500	PF3D7_1125700	0.782
PF3D7_1230600	PF3D7_1332800	0.817
PF3D7_0100200	PF3D7_0800300	0.751
PF3D7_0212300	PF3D7_1026800	0.955
PF3D7_0311600	PF3D7_1368100	0.911
PF3D7_0904800	PF3D7_1117100	0.733
PF3D7_1127100	PF3D7_1332600	0.706
PF3D7_1012600	PF3D7_1129400	0.967
PF3D7_0312800	PF3D7_0707900	0.758
PF3D7_1010200	PF3D7_1332400	0.738
PF3D7_0302100	PF3D7_1367100	0.835
PF3D7_1330600	PF3D7_1346100	0.793
PF3D7_0105300	PF3D7_1228600	0.9
PF3D7_0822000	PF3D7_1242700	0.811
PF3D7_0725400	PF3D7_1410400	0.847
PF3D7_1104900	PF3D7_1476300	0.785
PF3D7_0405000	PF3D7_1008800	0.823
PF3D7_1310700	PF3D7_1461400	0.89
PF3D7_0920800	PF3D7_1420400	0.866
PF3D7_1252300	PF3D7_1476200	0.706
PF3D7_1030000	PF3D7_1322100	0.909
PF3D7_0412000	PF3D7_0504400	0.734
PF3D7_0818100	PF3D7_1036000	0.927
PF3D7_0211200	PF3D7_0515300	0.947
PF3D7_0630300	PF3D7_1417800	0.973
PF3D7_1143300	PF3D7_1439100	0.925
PF3D7_0707900	PF3D7_1129400	0.949
PF3D7_0618300	PF3D7_0919600	0.904
PF3D7_1330800	PF3D7_1357700	0.703
PF3D7_0613800	PF3D7_0927300	0.84
PF3D7_0306900	PF3D7_1242700	0.999
PF3D7_0719700	PF3D7_1302800	0.999
PF3D7_0503800	PF3D7_1223900	0.901
PF3D7_1411900	PF3D7_1476000	0.729
PF3D7_0412100	PF3D7_1413400	0.945
PF3D7_0802600	PF3D7_1341500	0.779
PF3D7_1405800	PF3D7_1448000	0.988
PF3D7_0823300	PF3D7_1333700	0.875
PF3D7_0923800.2	PF3D7_1124500	0.908
PF3D7_0812600	PF3D7_1368800	0.74
PF3D7_0722400	PF3D7_0824300	0.708
PF3D7_1309100	PF3D7_1312900	0.917
PF3D7_0320900	PF3D7_0615500	0.768
PF3D7_0706000	PF3D7_0932800	0.704
PF3D7_0520000	PF3D7_1419700	0.736
PF3D7_1143300	PF3D7_1206600	0.999
PF3D7_0507200	PF3D7_0717500	0.738
PF3D7_0613400	PF3D7_1472700	0.96
PF3D7_0615400	PF3D7_0720000	0.916
PF3D7_0519100	PF3D7_1342000	0.995
PF3D7_0403700	PF3D7_1107100	0.798
PF3D7_0710600	PF3D7_1451100	0.963
PF3D7_0726300	PF3D7_1012600	0.77
PF3D7_0303300	PF3D7_1213700	0.999
PF3D7_0807500	PF3D7_0931800	0.999
PF3D7_0805700	PF3D7_1322600	0.734
PF3D7_0704800	PF3D7_0932100	0.888
PF3D7_1213800	PF3D7_1332900	0.996
PF3D7_0802800	PF3D7_1358400	0.735
PF3D7_0210000	PF3D7_0519400	0.929
PF3D7_1107800	PF3D7_1344300	0.712
PF3D7_0319600	PF3D7_0618300	0.86
PF3D7_0316800	PF3D7_1134700	0.899
PF3D7_1102700	PF3D7_1352900	0.732
PF3D7_0516900	PF3D7_0923000	0.966
PF3D7_0523000	PF3D7_0708400	0.769
PF3D7_0218400	PF3D7_1237600	0.863
PF3D7_1325900	PF3D7_1433800	0.731
PF3D7_1143300	PF3D7_1351400	0.952
PF3D7_0306800	PF3D7_0621800	0.754
PF3D7_0516900	PF3D7_1245400	0.999
PF3D7_0407800	PF3D7_1459900	0.801
PF3D7_1103600	PF3D7_1434200	0.736
PF3D7_0519400	PF3D7_0706400	0.996
PF3D7_0411400	PF3D7_1437200	0.918
PF3D7_1445200	PF3D7_1471000	0.727
PF3D7_0501600	PF3D7_1310700	0.864
PF3D7_0915400	PF3D7_1033400	0.774
PF3D7_0216400	PF3D7_1406600	0.723
PF3D7_0922200	PF3D7_0922400	0.888
PF3D7_0810800	PF3D7_1224000	0.985
PF3D7_0503800	PF3D7_1123400	0.926
PF3D7_0203700	PF3D7_1302600	0.748
PF3D7_0415900	PF3D7_1323100	0.999
PF3D7_0704100	PF3D7_1035700	0.784
PF3D7_0415500	PF3D7_0520000	0.926
PF3D7_0929400	PF3D7_1344300	0.821
PF3D7_0302100	PF3D7_0522800	0.809
PF3D7_0932100	PF3D7_1019600	0.854
PF3D7_0904400	PF3D7_1026800	0.902
PF3D7_1361900	PF3D7_1411400	0.713
PF3D7_1309300	PF3D7_1324200	0.861
PF3D7_1020700	PF3D7_1107700	0.993
PF3D7_0628100	PF3D7_1206000	0.858
PF3D7_1012600	PF3D7_1015900	0.955
PF3D7_0305600	PF3D7_0919900	0.77
PF3D7_0312300	PF3D7_0317000	0.999
PF3D7_0317200	PF3D7_1304700	0.941
PF3D7_0923000	PF3D7_1137100	0.846
PF3D7_0217300	PF3D7_0528100	0.935
PF3D7_0301600	PF3D7_1221900	0.807
PF3D7_0415900	PF3D7_1324900	0.802
PF3D7_0509400	PF3D7_0613400	0.811
PF3D7_0207800	PF3D7_0611600	0.85
PF3D7_0306400	PF3D7_0613800	0.87
PF3D7_0905400	PF3D7_1459900	0.711
PF3D7_0405700	PF3D7_1033100	0.834
PF3D7_0821000	PF3D7_1202200	0.707
PF3D7_0532300	PF3D7_1302000	0.748
PF3D7_0520000	PF3D7_0821700	0.979
PF3D7_0731500	PF3D7_1222700	0.713
PF3D7_0530300	PF3D7_1471400	0.767
PF3D7_1329000	PF3D7_1435300	0.704
PF3D7_1228600	PF3D7_1356100	0.851
PF3D7_1028700	PF3D7_1361800	0.796
PF3D7_1245400	PF3D7_1365900	0.995
PF3D7_1021900	PF3D7_1460500	0.743
PF3D7_1019400	PF3D7_1338200	0.999
PF3D7_1129000	PF3D7_1129200	0.759
PF3D7_0703600	PF3D7_1409300	0.779
PF3D7_0409600	PF3D7_1239500	0.766
PF3D7_1015900	PF3D7_1126200	0.808
PF3D7_1037600	PF3D7_1244200	0.998
PF3D7_0607300	PF3D7_0708400	0.75
PF3D7_1243700	PF3D7_1356300	0.707
PF3D7_1206600	PF3D7_1418900	0.913
PF3D7_0935600	PF3D7_1115800	0.724
PF3D7_0805200	PF3D7_1351700	0.84
PF3D7_1408600	PF3D7_1413400	0.777
PF3D7_1021500	PF3D7_1445200	0.91
PF3D7_0614500	PF3D7_1367600	0.883
PF3D7_1112100	PF3D7_1325400	0.87
PF3D7_0934000	PF3D7_1350100	0.952
PF3D7_0926700	PF3D7_1012400	0.728
PF3D7_1140400	PF3D7_1238600	0.868
PF3D7_0505400	PF3D7_0625300	0.809
PF3D7_0607300	PF3D7_0802200	0.862
PF3D7_1130100	PF3D7_1302800	0.999
PF3D7_0405400	PF3D7_1126900	0.925
PF3D7_0501500	PF3D7_1036000	0.806
PF3D7_0302100	PF3D7_1022400	0.956
PF3D7_1138400	PF3D7_1304900	0.9
PF3D7_0703300	PF3D7_0731300	0.778
PF3D7_0210000	PF3D7_1346100	0.994
PF3D7_0203200	PF3D7_0214600	0.915
PF3D7_1445200	PF3D7_1461200	0.719
PF3D7_0203200	PF3D7_1413700	0.756
PF3D7_0813900	PF3D7_1015200.3	0.721
PF3D7_0517300	PF3D7_1118500	0.753
PF3D7_1370300	PF3D7_1413800	0.739
PF3D7_1032400	PF3D7_1326400	0.787
PF3D7_0305600	PF3D7_0312400	0.738
PF3D7_0301900	PF3D7_1313200	0.812
PF3D7_0105800	PF3D7_0305600	0.876
PF3D7_0722200	PF3D7_1222700	0.886
PF3D7_0613800	PF3D7_1321500.2	0.87
PF3D7_1329000	PF3D7_1434600	0.774
PF3D7_0930300	PF3D7_0934800	0.892
PF3D7_0501100.2	PF3D7_0708800	0.968
PF3D7_0716600	PF3D7_0727200	0.855
PF3D7_0105800	PF3D7_1133200	0.79
PF3D7_0517000	PF3D7_0822000	0.973
PF3D7_1252100	PF3D7_1409300	0.855
PF3D7_1123400	PF3D7_1246200	0.837
PF3D7_1003800	PF3D7_1026800	0.95
PF3D7_0217500	PF3D7_1003600	0.894
PF3D7_0303200	PF3D7_0717500	0.822
PF3D7_1124800	PF3D7_1466700	0.989
PF3D7_0111500	PF3D7_1437200	0.978
PF3D7_0818800	PF3D7_0906100	0.71
PF3D7_0629800	PF3D7_0821100	0.722
PF3D7_0525300	PF3D7_1251200	0.897
PF3D7_0512700	PF3D7_1354500	0.73
PF3D7_0307700	PF3D7_0505400	0.741
PF3D7_0422400	PF3D7_0919600	0.907
PF3D7_0719600	PF3D7_1367600	0.982
PF3D7_1012600	PF3D7_1352200	0.715
PF3D7_0420100	PF3D7_0729300	0.867
PF3D7_0715600	PF3D7_1235700	0.706
PF3D7_1234800	PF3D7_1343900	0.762
PF3D7_0611700	PF3D7_1142500	0.9
PF3D7_0215700	PF3D7_1037100	0.946
PF3D7_0515900	PF3D7_1355700	0.922
PF3D7_1336900	PF3D7_1461900	0.717
PF3D7_0103800	PF3D7_0708400	0.881
PF3D7_1031400.2	PF3D7_1146600	0.796
PF3D7_0811000	PF3D7_1343100	0.757
PF3D7_0513300	PF3D7_1012500	0.784
PF3D7_0307500	PF3D7_1405600	0.701
PF3D7_1210100	PF3D7_1324700	0.8
PF3D7_0811900	PF3D7_1228300	0.718
PF3D7_0704200	PF3D7_1106300	0.741
PF3D7_0317700	PF3D7_1037600	0.802
PF3D7_0913800	PF3D7_1125800	0.927
PF3D7_0829200	PF3D7_1215300	0.784
PF3D7_0202200	PF3D7_1352900	0.734
PF3D7_0415600	PF3D7_1125200	0.869
PF3D7_1330600	PF3D7_1351400	0.83
PF3D7_0507700	PF3D7_1418000	0.999
PF3D7_0508000	PF3D7_1035100	0.907
PF3D7_0707900	PF3D7_1132700	0.823
PF3D7_0509400	PF3D7_1465900	0.875
PF3D7_1012200	PF3D7_1022700	0.876
PF3D7_0206200	PF3D7_0731500	0.779
PF3D7_0610900	PF3D7_1322100	0.888
PF3D7_0821700	PF3D7_1019400	0.999
PF3D7_0916000	PF3D7_1335100	0.731
PF3D7_0210600	PF3D7_1031200	0.807
PF3D7_0423300	PF3D7_0528400	0.89
PF3D7_1137500	PF3D7_1441200	0.875
PF3D7_0821500	PF3D7_1012600	0.757
PF3D7_0707400	PF3D7_1124700	0.762
PF3D7_0818900	PF3D7_0920800	0.833
PF3D7_0217100	PF3D7_1331300	0.723
PF3D7_1364100	PF3D7_1439000	0.723
PF3D7_0807800	PF3D7_1224300	0.913
PF3D7_0804600	PF3D7_0922400	0.815
PF3D7_0212300	PF3D7_1341200	0.95
PF3D7_0613900	PF3D7_1125800	0.89
PF3D7_1103700	PF3D7_1433500	0.717
PF3D7_0425800	PF3D7_0800300	0.823
PF3D7_0621800	PF3D7_1308300	0.824
PF3D7_0604700	PF3D7_0925500	0.73
PF3D7_0528400	PF3D7_1012200	0.917
PF3D7_0217800	PF3D7_1332800	0.848
PF3D7_0629400	PF3D7_1452700	0.824
PF3D7_1329000	PF3D7_1441200	0.792
PF3D7_0727400	PF3D7_1235300	0.95
PF3D7_1125400	PF3D7_1434700	0.994
PF3D7_0813900	PF3D7_0903900	0.999
PF3D7_0411400	PF3D7_1230600	0.895
PF3D7_0816000	PF3D7_1225500	0.889
PF3D7_0307400	PF3D7_1306200	0.752
PF3D7_0405400	PF3D7_1304900	0.908
PF3D7_1327400	PF3D7_1409300	0.79
PF3D7_1206700	PF3D7_1368200	0.94
PF3D7_0317200	PF3D7_1446600	0.704
PF3D7_1338200	PF3D7_1421200	0.994
PF3D7_0517700	PF3D7_1469000	0.8
PF3D7_0914400	PF3D7_1335100	0.781
PF3D7_0719700	PF3D7_1323400	0.97
PF3D7_0217500	PF3D7_0914400	0.8
PF3D7_1136200	PF3D7_1238600	0.787
PF3D7_0319000	PF3D7_1315600	0.805
PF3D7_1028400	PF3D7_1428300	0.989
PF3D7_0105300	PF3D7_1440100	0.731
PF3D7_0522500	PF3D7_1245400	0.968
PF3D7_0520000	PF3D7_1126200	0.999
PF3D7_0106300	PF3D7_0607300	0.96
PF3D7_0628100	PF3D7_1401600	0.714
PF3D7_0623200	PF3D7_0720400	0.713
PF3D7_0203300	PF3D7_0206000	0.826
PF3D7_0506900	PF3D7_0934800	0.92
PF3D7_0708400	PF3D7_1033100	0.754
PF3D7_1103600	PF3D7_1433500	0.944
PF3D7_0612200	PF3D7_0803400	0.762
PF3D7_0210000	PF3D7_1027800	0.96
PF3D7_0318200	PF3D7_0320300	0.704
PF3D7_0923800.2	PF3D7_1345100	0.901
PF3D7_1342000	PF3D7_1465900	0.999
PF3D7_0501400	PF3D7_1002100	0.833
PF3D7_1132200	PF3D7_1333000	0.999
PF3D7_0304100	PF3D7_0919200	0.782
PF3D7_0110400	PF3D7_0517300	0.937
PF3D7_0109700	PF3D7_1006700	0.813
PF3D7_1229500	PF3D7_1424100	0.712
PF3D7_1029900	PF3D7_1228600	0.887
PF3D7_0528200	PF3D7_1447000	0.949
PF3D7_0305600	PF3D7_1343100	0.878
PF3D7_0414700	PF3D7_1357700	0.8
PF3D7_0618300	PF3D7_1433600	0.9
PF3D7_0517700	PF3D7_0721600	0.977
PF3D7_0909800	PF3D7_0923000	0.932
PF3D7_0813900	PF3D7_1366600	0.931
PF3D7_0106000	PF3D7_0607700	0.814
PF3D7_0816000	PF3D7_1217200	0.804
PF3D7_0814000	PF3D7_1358800	0.999
PF3D7_1109400	PF3D7_1225500	0.986
PF3D7_0501600	PF3D7_1125700	0.758
PF3D7_0903900	PF3D7_1004000	0.999
PF3D7_0217900	PF3D7_0615500	0.725
PF3D7_0105800	PF3D7_0704500	0.742
PF3D7_0207500	PF3D7_1236800	0.749
PF3D7_1305300	PF3D7_1445100	0.912
PF3D7_0423500	PF3D7_1029900	0.867
PF3D7_1433500	PF3D7_1438900	0.803
PF3D7_0414900	PF3D7_1436600	0.817
PF3D7_0815600	PF3D7_1206700	0.999
PF3D7_1115600	PF3D7_1132800	0.735
PF3D7_1021900	PF3D7_1239200	0.765
PF3D7_0419700	PF3D7_1146600	0.73
PF3D7_1006800	PF3D7_1022400	0.815
PF3D7_0918600	PF3D7_1030100	0.794
PF3D7_1144000	PF3D7_1308300	0.999
PF3D7_0317600	PF3D7_1460700	0.996
PF3D7_0501500	PF3D7_1310700	0.773
PF3D7_0410700	PF3D7_1307300	0.84
PF3D7_0415900	PF3D7_0501000	0.773
PF3D7_1429700	PF3D7_1450100	0.704
PF3D7_1109900	PF3D7_1331800	0.999
PF3D7_0802800	PF3D7_1107100	0.754
PF3D7_0528400	PF3D7_0930300	0.817
PF3D7_0220100	PF3D7_0411000	0.714
PF3D7_0210000	PF3D7_0317600	0.917
PF3D7_1122700	PF3D7_1321500.2	0.754
PF3D7_0317600	PF3D7_1410600	0.947
PF3D7_0219200	PF3D7_0821700	0.987
PF3D7_0309500	PF3D7_1430700	0.852
PF3D7_1035400	PF3D7_1251200	0.725
PF3D7_0410400	PF3D7_1359300	0.946
PF3D7_1001600	PF3D7_1252100	0.728
PF3D7_0922500	PF3D7_1118200	0.774
PF3D7_0525300	PF3D7_1351700	0.9
PF3D7_1004000	PF3D7_1341200	0.999
PF3D7_1414400	PF3D7_1438500	0.918
PF3D7_0307400	PF3D7_1117100	0.785
PF3D7_0525100	PF3D7_1200700	0.924
PF3D7_1406200	PF3D7_1449700	0.787
PF3D7_0319600	PF3D7_0516900	0.838
PF3D7_1212800	PF3D7_1462700	0.982
PF3D7_1338300	PF3D7_1358800	0.896
PF3D7_0612900	PF3D7_1310800	0.848
PF3D7_0918300	PF3D7_1132200	0.726
PF3D7_0519100	PF3D7_1433500	0.781
PF3D7_1362700	PF3D7_1459000	0.859
PF3D7_0814000	PF3D7_1338300	0.971
PF3D7_0522200	PF3D7_0929000	0.708
PF3D7_0728600	PF3D7_1440000	0.724
PF3D7_0517900	PF3D7_1321500.2	0.771
PF3D7_0305600	PF3D7_0903300	0.838
PF3D7_1018000	PF3D7_1424100	0.711
PF3D7_1103100	PF3D7_1302800	0.998
PF3D7_0816000	PF3D7_1251500	0.839
PF3D7_1338200	PF3D7_1465900	0.999
PF3D7_0518500	PF3D7_1234800	0.919
PF3D7_0920800	PF3D7_1015000	0.735
PF3D7_0217500	PF3D7_0503400	0.784
PF3D7_0309600	PF3D7_0706400	0.991
PF3D7_0902800	PF3D7_1227500	0.708
PF3D7_1359400	PF3D7_1410600	0.715
PF3D7_0916700	PF3D7_1474900	0.9
PF3D7_1008800	PF3D7_1028300	0.765
PF3D7_0520000	PF3D7_0920800	0.878
PF3D7_1225800	PF3D7_1460400	0.914
PF3D7_0827100	PF3D7_1358800	0.751
PF3D7_0826700	PF3D7_1130100	0.99
PF3D7_0518600	PF3D7_1226800	0.795
PF3D7_0527900	PF3D7_1107300	0.716
PF3D7_0108600	PF3D7_1222300	0.734
PF3D7_0412100	PF3D7_0613400	0.991
PF3D7_0104200	PF3D7_0410000	0.733
PF3D7_1338200	PF3D7_1447000	0.999
PF3D7_1019400	PF3D7_1407100	0.84
PF3D7_0510100	PF3D7_1456000	0.82
PF3D7_0506100	PF3D7_1431700	0.797
PF3D7_0821300	PF3D7_0924700	0.739
PF3D7_1107700	PF3D7_1302700	0.852
PF3D7_0911700	PF3D7_1331300	0.76
PF3D7_0105300	PF3D7_0419400	0.895
PF3D7_0602400	PF3D7_1447000	0.981
PF3D7_1006700	PF3D7_1225400	0.734
PF3D7_0807500	PF3D7_1306400	0.999
PF3D7_0308100	PF3D7_0934800	0.768
PF3D7_1138500	PF3D7_1458000	0.711
PF3D7_0615500	PF3D7_1412500	0.781
PF3D7_1227600	PF3D7_1417800	0.74
PF3D7_0309500	PF3D7_0922400	0.784
PF3D7_0630500	PF3D7_1134700	0.989
PF3D7_0619400	PF3D7_1134100	0.74
PF3D7_1015600	PF3D7_1222300	0.902
PF3D7_0707400	PF3D7_1012600	0.792
PF3D7_1037100	PF3D7_1435300	0.846
PF3D7_0105300	PF3D7_0508000	0.817
PF3D7_1132200	PF3D7_1215300	0.999
PF3D7_1014300	PF3D7_1227500	0.702
PF3D7_0805700	PF3D7_1436600	0.707
PF3D7_0415900	PF3D7_0920800	0.81
PF3D7_0109800	PF3D7_0311200	0.814
PF3D7_0303200	PF3D7_1211700	0.705
PF3D7_0923800.2	PF3D7_1433500	0.728
PF3D7_1123400	PF3D7_1412500	0.874
PF3D7_0528100	PF3D7_0617100	0.914
PF3D7_1138400	PF3D7_1325400	0.87
PF3D7_0306800	PF3D7_0618300	0.806
PF3D7_0803400	PF3D7_0918600	0.944
PF3D7_0917900	PF3D7_1215300	0.797
PF3D7_0815500	PF3D7_1417800	0.784
PF3D7_1111100	PF3D7_1463300	0.989
PF3D7_0817700	PF3D7_1036000	0.828
PF3D7_0307400	PF3D7_1119600	0.733
PF3D7_0610400	PF3D7_0809900	0.721
PF3D7_1309500	PF3D7_1367600	0.793
PF3D7_0814900	PF3D7_1124700	0.807
PF3D7_0811300	PF3D7_1224300	0.856
PF3D7_0605000	PF3D7_0814000	0.861
PF3D7_0619900	PF3D7_0822300	0.968
PF3D7_0501500	PF3D7_1224100	0.732
PF3D7_0932400	PF3D7_1137500	0.738
PF3D7_0710600	PF3D7_0719600	0.999
PF3D7_0818700	PF3D7_0925700	0.814
PF3D7_0203700	PF3D7_0218400	0.893
PF3D7_0614500	PF3D7_1130200	0.999
PF3D7_0517000	PF3D7_1246800	0.9
PF3D7_0303200	PF3D7_1140400	0.731
PF3D7_0719600	PF3D7_1037300	0.78
PF3D7_1028400	PF3D7_1357700	0.914
PF3D7_0605000	PF3D7_1026800	0.901
PF3D7_0308900	PF3D7_0318200	0.943
PF3D7_0106800	PF3D7_1145400	0.73
PF3D7_1037100	PF3D7_1202000	0.928
PF3D7_1329100	PF3D7_1445400	0.712
PF3D7_0104200	PF3D7_1146600	0.728
PF3D7_1021800	PF3D7_1344300	0.855
PF3D7_0719600	PF3D7_1230900	0.745
PF3D7_0501800	PF3D7_1022800	0.732
PF3D7_0921200	PF3D7_1467200	0.725
PF3D7_0532300	PF3D7_0702500	0.902
PF3D7_0922200	PF3D7_1211800	0.869
PF3D7_1247900	PF3D7_1370300	0.766
PF3D7_0933600	PF3D7_1404100	0.931
PF3D7_1246200	PF3D7_1327400	0.79
PF3D7_0913300	PF3D7_1327600	0.721
PF3D7_0203200	PF3D7_0628100	0.756
PF3D7_1030100	PF3D7_1429900	0.794
PF3D7_1019600	PF3D7_1322500	0.89
PF3D7_0210600	PF3D7_0419700	0.852
PF3D7_1228600	PF3D7_1238000	0.72
PF3D7_0628800	PF3D7_1349200	0.971
PF3D7_0821700	PF3D7_1429700	0.812
PF3D7_0719500	PF3D7_1112100	0.793
PF3D7_1229500	PF3D7_1331700	0.733
PF3D7_0716100	PF3D7_0814300	0.79
PF3D7_0322500	PF3D7_1447900	0.768
PF3D7_0811000	PF3D7_1367000	0.999
PF3D7_0507100	PF3D7_1143300	0.977
PF3D7_0918000	PF3D7_1409300	0.774
PF3D7_1110700	PF3D7_1138400	0.715
PF3D7_0103600	PF3D7_1224300	0.796
PF3D7_1102700	PF3D7_1149200	0.941
PF3D7_1341300	PF3D7_1414300	0.999
PF3D7_1138800	PF3D7_1440100	0.743
PF3D7_0511000	PF3D7_1302800	0.753
PF3D7_0217800	PF3D7_1206700	0.918
PF3D7_0927600	PF3D7_1238600	0.719
PF3D7_0209200	PF3D7_0512700	0.706
PF3D7_0527000	PF3D7_1463300	0.74
PF3D7_1245400	PF3D7_1424400	0.725
PF3D7_1030200	PF3D7_1401600	0.737
PF3D7_1146000	PF3D7_1423000	0.993
PF3D7_0803200	PF3D7_0831600	0.87
PF3D7_1417500	PF3D7_1429400	0.704
PF3D7_0316800	PF3D7_1026800	0.999
PF3D7_0423300	PF3D7_1461400	0.894
PF3D7_1102700	PF3D7_1370300	0.917
PF3D7_0311100	PF3D7_1119800	0.732
PF3D7_0212300	PF3D7_0703500	0.979
PF3D7_1001900	PF3D7_1102700	0.749
PF3D7_0621300	PF3D7_1367400	0.72
PF3D7_0528400	PF3D7_1232500	0.91
PF3D7_0913800	PF3D7_1030200	0.835
PF3D7_0413600	PF3D7_1306400	0.999
PF3D7_1227500	PF3D7_1227600	0.855
PF3D7_1422400	PF3D7_1449700	0.71
PF3D7_0419800	PF3D7_0422400	0.887
PF3D7_1227800	PF3D7_1434600	0.775
PF3D7_0725000	PF3D7_1017000	0.819
PF3D7_0501100.2	PF3D7_1434300	0.756
PF3D7_0404000	PF3D7_0919200	0.832
PF3D7_0904600	PF3D7_1414700	0.969
PF3D7_0523100	PF3D7_1227100	0.767
PF3D7_0414700	PF3D7_1343200	0.888
PF3D7_0312800	PF3D7_0419800	0.828
PF3D7_0512600	PF3D7_1316200	0.807
PF3D7_1003800	PF3D7_1461600	0.97
PF3D7_1228600	PF3D7_1232500	0.855
PF3D7_0318200	PF3D7_1414600	0.979
PF3D7_0526500	PF3D7_1224300	0.741
PF3D7_1105400	PF3D7_1460300	0.996
PF3D7_1020700	PF3D7_1431300	0.943
PF3D7_0218500	PF3D7_0517300	0.946
PF3D7_0207800	PF3D7_0932100	0.769
PF3D7_0611700	PF3D7_0904400	0.906
PF3D7_1137500	PF3D7_1446600	0.791
PF3D7_0630300	PF3D7_1364600	0.735
PF3D7_0710900	PF3D7_1460300	0.809
PF3D7_0716600	PF3D7_1237000	0.723
PF3D7_0519400	PF3D7_1331300	0.902
PF3D7_1015800	PF3D7_1417800	0.852
PF3D7_0403500	PF3D7_0413900	0.861
PF3D7_0617100	PF3D7_0730200	0.914
PF3D7_0309000	PF3D7_1127000	0.743
PF3D7_1031200	PF3D7_1430200	0.801
PF3D7_0805700	PF3D7_1319400	0.811
PF3D7_0110800	PF3D7_0320900	0.8
PF3D7_1341300	PF3D7_1465900	0.999
PF3D7_0102600	PF3D7_1401300	0.71
PF3D7_1213700	PF3D7_1224000	0.816
PF3D7_0509800	PF3D7_1316200	0.819
PF3D7_0308200	PF3D7_0818900	0.87
PF3D7_1012600	PF3D7_1023200	0.932
PF3D7_1356100	PF3D7_1439000	0.72
PF3D7_0811300	PF3D7_1032100	0.937
PF3D7_0517300	PF3D7_1420000	0.946
PF3D7_0825200	PF3D7_1137500	0.731
PF3D7_1451900	PF3D7_1471000	0.912
PF3D7_1134800	PF3D7_1211800	0.771
PF3D7_1028400	PF3D7_1419100	0.917
PF3D7_1133200	PF3D7_1319400	0.777
PF3D7_0419600	PF3D7_1113200	0.826
PF3D7_0819100	PF3D7_1412600	0.711
PF3D7_0516900	PF3D7_1357800	0.765
PF3D7_1020800	PF3D7_1342800	0.851
PF3D7_1210000	PF3D7_1413400	0.935
PF3D7_0729300	PF3D7_1343200	0.711
PF3D7_1343100	PF3D7_1414400	0.734
PF3D7_0622800	PF3D7_1225100	0.89
PF3D7_0528200	PF3D7_0813900	0.984
PF3D7_0320700	PF3D7_1308800	0.755
PF3D7_0613800	PF3D7_1364100	0.87
PF3D7_1033600	PF3D7_1439100	0.984
PF3D7_0708800	PF3D7_1015600	0.867
PF3D7_1247900	PF3D7_1461200	0.932
PF3D7_0320300	PF3D7_1012600	0.95
PF3D7_0415500	PF3D7_1202500	0.922
PF3D7_0317000	PF3D7_1365900	0.932
PF3D7_0522500	PF3D7_1233000	0.895
PF3D7_0404000	PF3D7_1035500	0.763
PF3D7_0809900	PF3D7_0811500	0.723
PF3D7_0925200	PF3D7_1241800	0.739
PF3D7_1322500	PF3D7_1346900	0.819
PF3D7_0214600	PF3D7_0214900	0.702
PF3D7_0303200	PF3D7_0715200	0.772
PF3D7_0422400	PF3D7_1005500	0.9
PF3D7_0306900	PF3D7_0621800	0.764
PF3D7_1306200	PF3D7_1331300	0.808
PF3D7_0903300	PF3D7_1452000	0.717
PF3D7_0729200	PF3D7_1215000	0.976
PF3D7_1306400	PF3D7_1368100	0.999
PF3D7_0505800	PF3D7_1117100	0.701
PF3D7_1358800	PF3D7_1445900	0.728
PF3D7_1116800	PF3D7_1357800	0.704
PF3D7_0532100	PF3D7_1024800	0.702
PF3D7_0211200	PF3D7_0529300	0.713
PF3D7_1144000	PF3D7_1242700	0.999
PF3D7_1236800	PF3D7_1465000	0.71
PF3D7_1033400	PF3D7_1426100	0.889
PF3D7_0726400	PF3D7_1019000	0.777
PF3D7_0317600	PF3D7_1206700	0.906
PF3D7_0909600	PF3D7_1422500	0.702
PF3D7_1019400	PF3D7_1332800	0.983
PF3D7_0520000	PF3D7_1465900	0.999
PF3D7_0308600	PF3D7_1439100	0.982
PF3D7_0612900	PF3D7_1354300	0.978
PF3D7_0507200	PF3D7_0916000	0.743
PF3D7_0219600	PF3D7_0412000	0.784
PF3D7_1216100	PF3D7_1221200	0.743
PF3D7_0407800	PF3D7_1327400	0.729
PF3D7_0422700	PF3D7_0705700	0.93
PF3D7_0927300	PF3D7_1128700	0.708
PF3D7_1224300	PF3D7_1406000	0.92
PF3D7_0614500	PF3D7_1358800	0.999
PF3D7_1247400	PF3D7_1341900	0.802
PF3D7_0813900	PF3D7_1235400	0.788
PF3D7_0704100	PF3D7_1322500	0.802
PF3D7_1209300	PF3D7_1317100	0.812
PF3D7_0508100	PF3D7_1003100	0.77
PF3D7_0921800	PF3D7_1021500	0.854
PF3D7_1014300	PF3D7_1456000	0.709
PF3D7_1011700	PF3D7_1037600	0.868
PF3D7_0418600	PF3D7_1012200	0.71
PF3D7_1223000	PF3D7_1409300	0.726
PF3D7_0923200	PF3D7_1012600	0.726
PF3D7_0729400	PF3D7_1251500	0.988
PF3D7_0917900	PF3D7_1002800	0.795
PF3D7_0410700	PF3D7_0927600	0.746
PF3D7_0512200	PF3D7_1232900	0.737
PF3D7_0219600	PF3D7_0505500	0.823
PF3D7_0605800	PF3D7_1347100	0.81
PF3D7_1116800	PF3D7_1134000	0.979
PF3D7_1211800	PF3D7_1418000	0.912
PF3D7_0305600	PF3D7_0317200	0.768
PF3D7_0913600	PF3D7_1234600	0.748
PF3D7_1304000	PF3D7_1439400	0.798
PF3D7_1120300	PF3D7_1427600	0.861
PF3D7_1223900	PF3D7_1460300	0.89
PF3D7_0206000	PF3D7_0917100	0.757
PF3D7_1202000	PF3D7_1359200	0.906
PF3D7_0103600	PF3D7_1410600	0.913
PF3D7_0207500	PF3D7_0723800	0.801
PF3D7_0518500	PF3D7_0923000	0.902
PF3D7_0823300	PF3D7_1250800	0.712
PF3D7_0919300	PF3D7_1335300	0.724
PF3D7_0802300	PF3D7_1461200	0.992
PF3D7_0827500	PF3D7_1130200	0.988
PF3D7_0729400	PF3D7_0814300	0.924
PF3D7_0414900	PF3D7_0525300	0.916
PF3D7_1419100	PF3D7_1466700	0.964
PF3D7_0408500	PF3D7_1117800	0.81
PF3D7_0503000	PF3D7_0721100	0.944
PF3D7_1126900	PF3D7_1325000	0.751
PF3D7_0803200	PF3D7_1107100	0.774
PF3D7_0501800	PF3D7_0903300	0.734
PF3D7_1019400	PF3D7_1465900	0.999
PF3D7_0807500	PF3D7_0907700	0.969
PF3D7_1306400	PF3D7_1466300	0.999
PF3D7_0106700	PF3D7_1407100	0.98
PF3D7_0903300	PF3D7_1440100	0.85
PF3D7_1029900	PF3D7_1031200	0.751
PF3D7_0725000	PF3D7_1429900	0.975
PF3D7_0612200	PF3D7_1133200	0.722
PF3D7_0520000	PF3D7_1330600	0.915
PF3D7_1109900	PF3D7_1341300	0.999
PF3D7_0501800	PF3D7_0630300	0.741
PF3D7_0304100	PF3D7_1116100	0.76
PF3D7_0908700	PF3D7_1018000	0.812
PF3D7_0934000	PF3D7_1225100	0.86
PF3D7_0517700	PF3D7_1358800	0.987
PF3D7_0925700	PF3D7_1118200	0.701
PF3D7_0907500	PF3D7_1012200	0.726
PF3D7_0802000	PF3D7_1435300	0.99
PF3D7_0528500	PF3D7_0528600	0.956
PF3D7_0932100	PF3D7_1211800	0.79
PF3D7_1143400	PF3D7_1414300	0.728
PF3D7_1019600	PF3D7_1228600	0.889
PF3D7_0929400	PF3D7_1322500	0.83
PF3D7_1107000	PF3D7_1443300	0.999
PF3D7_0307400	PF3D7_1364100	0.761
PF3D7_0519400	PF3D7_1106100	0.83
PF3D7_0423500	PF3D7_0515700	0.917
PF3D7_1348300	PF3D7_1357100	0.717
PF3D7_0630300	PF3D7_0705400	0.925
PF3D7_0309600	PF3D7_1342000	0.994
PF3D7_0729300	PF3D7_1423000	0.926
PF3D7_0602100	PF3D7_0615400	0.764
PF3D7_0422400	PF3D7_1010600	0.951
PF3D7_0409200	PF3D7_1028300	0.848
PF3D7_0520000	PF3D7_1015200.3	0.76
PF3D7_0312800	PF3D7_0705700	0.999
PF3D7_0811900	PF3D7_1325900	0.748
PF3D7_0419400	PF3D7_0723800	0.78
PF3D7_1357000	PF3D7_1412500	0.876
PF3D7_1302700	PF3D7_1332700	0.943
PF3D7_1015900	PF3D7_1132200	0.776
PF3D7_0904700	PF3D7_1324100	0.711
PF3D7_1246200	PF3D7_1431500	0.764
PF3D7_0812400	PF3D7_1033600	0.762
PF3D7_0710400	PF3D7_0911900	0.95
PF3D7_1344000	PF3D7_1419800.2	0.906
PF3D7_0419300	PF3D7_1361900	0.832
PF3D7_1136600	PF3D7_1227800	0.755
PF3D7_0317200	PF3D7_1133200	0.741
PF3D7_1123900	PF3D7_1134700	0.855
PF3D7_0303400	PF3D7_1107100	0.811
PF3D7_1140400	PF3D7_1232500	0.894
PF3D7_0919900	PF3D7_0934800	0.789
PF3D7_1116800	PF3D7_1356700	0.844
PF3D7_0408500	PF3D7_1211700	0.847
PF3D7_0612900	PF3D7_1408600	0.782
PF3D7_1224000	PF3D7_1239700	0.742
PF3D7_0307100	PF3D7_0507100	0.999
PF3D7_0308900	PF3D7_1451100	0.96
PF3D7_0822000	PF3D7_1026800	0.927
PF3D7_0715200	PF3D7_1116100	0.724
PF3D7_0532100	PF3D7_1426100	0.711
PF3D7_0803500	PF3D7_1036000	0.719
PF3D7_0211800	PF3D7_1426200	0.769
PF3D7_0904800	PF3D7_1405600	0.796
PF3D7_1013100	PF3D7_1237600	0.971
PF3D7_0507200	PF3D7_1238000	0.717
PF3D7_0614500	PF3D7_1308300	0.999
PF3D7_0932000	PF3D7_1342600	0.814
PF3D7_1116100	PF3D7_1246200	0.879
PF3D7_0105400.2	PF3D7_0423300	0.845
PF3D7_0317800	PF3D7_1002500	0.951
PF3D7_0508100	PF3D7_1323700	0.846
PF3D7_0525800	PF3D7_0919200	0.795
PF3D7_0104100	PF3D7_1235200	0.722
PF3D7_0508900	PF3D7_1308400	0.724
PF3D7_1417500	PF3D7_1433000	0.94
PF3D7_1036000	PF3D7_1361800	0.869
PF3D7_1222300	PF3D7_1437900	0.968
PF3D7_1137500	PF3D7_1308800	0.752
PF3D7_0927300	PF3D7_1212800	0.999
PF3D7_1110200	PF3D7_1325000	0.934
PF3D7_0904900	PF3D7_1331600	0.724
PF3D7_1123900	PF3D7_1302600	0.804
PF3D7_1130100	PF3D7_1204300	0.985
PF3D7_0307200	PF3D7_1441200	0.997
PF3D7_0821300	PF3D7_1415200	0.948
PF3D7_0201800	PF3D7_0818900	0.927
PF3D7_0730300	PF3D7_0730800.2	0.718
PF3D7_1426000	PF3D7_1429700	0.898
PF3D7_1009700	PF3D7_1224100	0.714
PF3D7_0519200	PF3D7_1310000	0.965
PF3D7_1134000	PF3D7_1413900	0.944
PF3D7_1105400	PF3D7_1109400	0.715
PF3D7_0220100	PF3D7_1340300	0.764
PF3D7_0719600	PF3D7_1406000	0.946
PF3D7_0423500	PF3D7_1035700	0.789
PF3D7_0211700	PF3D7_1455000	0.74
PF3D7_0317000	PF3D7_1129200	0.999
PF3D7_0830600	PF3D7_1472200	0.71
PF3D7_0412100	PF3D7_0827500	0.849
PF3D7_1015800	PF3D7_1317100	0.889
PF3D7_1217300	PF3D7_1444300	0.711
PF3D7_1126900	PF3D7_1350200	0.999
PF3D7_1133000	PF3D7_1140400	0.71
PF3D7_0307200	PF3D7_1332800	0.907
PF3D7_0207500	PF3D7_0919900	0.879
PF3D7_1223000	PF3D7_1323700	0.84
PF3D7_0308100	PF3D7_0508100	0.779
PF3D7_0721600	PF3D7_1218600	0.713
PF3D7_0709100	PF3D7_1456000	0.749
PF3D7_0802800	PF3D7_1435300	0.817
PF3D7_0213500	PF3D7_1356700	0.756
PF3D7_1317800	PF3D7_1357100	0.925
PF3D7_1129400	PF3D7_1307100	0.747
PF3D7_0423500	PF3D7_0717500	0.856
PF3D7_0517400	PF3D7_1406200	0.807
PF3D7_0425800	PF3D7_1240600	0.759
PF3D7_0814900	PF3D7_1352500	0.707
PF3D7_0924700	PF3D7_1439100	0.707
PF3D7_0702000	PF3D7_1401100	0.796
PF3D7_0802800	PF3D7_1364100	0.775
PF3D7_0525300	PF3D7_0932000	0.766
PF3D7_0320100	PF3D7_1361100	0.906
PF3D7_0803200	PF3D7_0829400	0.748
PF3D7_0217800	PF3D7_1424400	0.995
PF3D7_1224100	PF3D7_1228600	0.907
PF3D7_0205200	PF3D7_0705500	0.705
PF3D7_0613800	PF3D7_1453200	0.709
PF3D7_0626800	PF3D7_1405600	0.917
PF3D7_0412100	PF3D7_0509400	0.777
PF3D7_1123900	PF3D7_1245400	0.78
PF3D7_0209600	PF3D7_1471400	0.729
PF3D7_0510500	PF3D7_1022400	0.944
PF3D7_0729300	PF3D7_1010200	0.73
PF3D7_1217800	PF3D7_1356600	0.838
PF3D7_0106300	PF3D7_0810800	0.738
PF3D7_1216300	PF3D7_1460300	0.911
PF3D7_0100200	PF3D7_0100300	0.848
PF3D7_0934800	PF3D7_1430200	0.861
PF3D7_0318200	PF3D7_1231500	0.9
PF3D7_0802800	PF3D7_1335100	0.784
PF3D7_1012600	PF3D7_1438500	0.744
PF3D7_0218400	PF3D7_1226700	0.784
PF3D7_1035100	PF3D7_1146600	0.842
PF3D7_0410600	PF3D7_1344200	0.929
PF3D7_0111500	PF3D7_1023200	0.938
PF3D7_0611700	PF3D7_1461300	0.997
PF3D7_0308100	PF3D7_1009700	0.79
PF3D7_0217500	PF3D7_1452000	0.932
PF3D7_1235600	PF3D7_1419800.2	0.832
PF3D7_0703900	PF3D7_1111000	0.707
PF3D7_1134000	PF3D7_1344200	0.718
PF3D7_0509400	PF3D7_1414300	0.896
PF3D7_0203300	PF3D7_1429900	0.711
PF3D7_0220800	PF3D7_1318000	0.705
PF3D7_0321100	PF3D7_1361800	0.765
PF3D7_1015900	PF3D7_1134000	0.896
PF3D7_0918100	PF3D7_1435300	0.742
PF3D7_0805200	PF3D7_0919300	0.852
PF3D7_0525200	PF3D7_1130700	0.811
PF3D7_0816600	PF3D7_1134000	0.982
PF3D7_1431500	PF3D7_1455100	0.88
PF3D7_0322000	PF3D7_1026800	0.845
PF3D7_0419600	PF3D7_1203700	0.712
PF3D7_0206200	PF3D7_1461400	0.78
PF3D7_0525300	PF3D7_1017500	0.854
PF3D7_1149200	PF3D7_1443900	0.734
PF3D7_0610400	PF3D7_1406200	0.843
PF3D7_0210600	PF3D7_0920500	0.804
PF3D7_0812600	PF3D7_1237000	0.805
PF3D7_0607700	PF3D7_1224100	0.816
PF3D7_0405200	PF3D7_0723300	0.781
PF3D7_1027800	PF3D7_1134700	0.91
PF3D7_0214600	PF3D7_0613900	0.953
PF3D7_0719600	PF3D7_1211800	0.894
PF3D7_1107700	PF3D7_1217200	0.814
PF3D7_1211800	PF3D7_1230700	0.847
PF3D7_1306400	PF3D7_1365900	0.944
PF3D7_1243600	PF3D7_1302800	0.756
PF3D7_0802300	PF3D7_1429500	0.727
PF3D7_0517000	PF3D7_1245400	0.977
PF3D7_0628200	PF3D7_1008100	0.723
PF3D7_0310400	PF3D7_1211700	0.822
PF3D7_0207500	PF3D7_1227000	0.763
PF3D7_0510100	PF3D7_1227600	0.887
PF3D7_1123800	PF3D7_1318400	0.884
PF3D7_0903900	PF3D7_1332800	0.709
PF3D7_0801000	PF3D7_0936800	0.76
PF3D7_0206000	PF3D7_1011700	0.792
PF3D7_0505200	PF3D7_1314200	0.726
PF3D7_0727200	PF3D7_1415800	0.759
PF3D7_0415900	PF3D7_1132700	0.9
PF3D7_0519100	PF3D7_0519400	0.864
PF3D7_0203700	PF3D7_0821500	0.73
PF3D7_0106400	PF3D7_1357700	0.789
PF3D7_0919600	PF3D7_1205900	0.736
PF3D7_0203300	PF3D7_1368800	0.999
PF3D7_0935800	PF3D7_1116100	0.703
PF3D7_0302500	PF3D7_0818100	0.757
PF3D7_0614500	PF3D7_1433600	0.9
PF3D7_0710600	PF3D7_1132700	0.889
PF3D7_0708400	PF3D7_0925700	0.827
PF3D7_1344900	PF3D7_1457700	0.718
PF3D7_0617000	PF3D7_1436000	0.709
PF3D7_0306900	PF3D7_0317600	0.999
PF3D7_0515700	PF3D7_1459900	0.84
PF3D7_0802600	PF3D7_1035700	0.794
PF3D7_1125400	PF3D7_1207600	0.715
PF3D7_0419700	PF3D7_1243700	0.804
PF3D7_0507500	PF3D7_0818100	0.923
PF3D7_0419800	PF3D7_1143300	0.765
PF3D7_0814000	PF3D7_1323400	0.999
PF3D7_0302000	PF3D7_1306900	0.771
PF3D7_0507100	PF3D7_0826700	0.999
PF3D7_0423300	PF3D7_0506900	0.743
PF3D7_0212900	PF3D7_1019600	0.764
PF3D7_0217500	PF3D7_0907500	0.703
PF3D7_1332900	PF3D7_1336900	0.9
PF3D7_0827000	PF3D7_1367600	0.961
PF3D7_0802300	PF3D7_1118200	0.726
PF3D7_1235600	PF3D7_1313200	0.944
PF3D7_0708100	PF3D7_1143300	0.996
PF3D7_1109400	PF3D7_1302700	0.995
PF3D7_0207500	PF3D7_1331600	0.826
PF3D7_1137100	PF3D7_1240000	0.773
PF3D7_0307200	PF3D7_0826700	0.979
PF3D7_1125700	PF3D7_1218000	0.773
PF3D7_0307700	PF3D7_0719500	0.779
PF3D7_0508000	PF3D7_0924500	0.743
PF3D7_0308200	PF3D7_1132200	0.993
PF3D7_0105400.2	PF3D7_0214600	0.73
PF3D7_0515000	PF3D7_1452700	0.76
PF3D7_1302800	PF3D7_1365900	0.999
PF3D7_0708800	PF3D7_1136800	0.928
PF3D7_1304000	PF3D7_1355100	0.877
PF3D7_0102900	PF3D7_0807900	0.845
PF3D7_0903900	PF3D7_1124900	0.999
PF3D7_0725400	PF3D7_0916000	0.771
PF3D7_1249900	PF3D7_1303100	0.72
PF3D7_0218000	PF3D7_0409600	0.944
PF3D7_0905500	PF3D7_1117400	0.741
PF3D7_0919000	PF3D7_1023900	0.705
PF3D7_0614900	PF3D7_1453200	0.707
PF3D7_1227900	PF3D7_1410200	0.808
PF3D7_0717700	PF3D7_1442300	0.823
PF3D7_1246800	PF3D7_1308300	0.9
PF3D7_0315100	PF3D7_1143400	0.765
PF3D7_0209600	PF3D7_0715300	0.718
PF3D7_0608900	PF3D7_0805700	0.737
PF3D7_0423800	PF3D7_1410400	0.834
PF3D7_0510500	PF3D7_1125300	0.828
PF3D7_0107200	PF3D7_1417200	0.716
PF3D7_0320900	PF3D7_1227800	0.812
PF3D7_0821700	PF3D7_1351400	0.999
PF3D7_0424700	PF3D7_1302000	0.741
PF3D7_0529500	PF3D7_1243600	0.716
PF3D7_0207500	PF3D7_0311300	0.756
PF3D7_0422700	PF3D7_0725200	0.948
PF3D7_0320700	PF3D7_0413700	0.727
PF3D7_1010600	PF3D7_1461300	0.928
PF3D7_0322900	PF3D7_1358800	0.999
PF3D7_1200700	PF3D7_1352900	0.747
PF3D7_0611100	PF3D7_0624700	0.703
PF3D7_0611700	PF3D7_0822000	0.831
PF3D7_0113000	PF3D7_1339300	0.721
PF3D7_0802800	PF3D7_1345600	0.839
PF3D7_1235600	PF3D7_1417800	0.738
PF3D7_1201800	PF3D7_1413400	0.721
PF3D7_0505500	PF3D7_1406600	0.723
PF3D7_0927900	PF3D7_1211800	0.746
PF3D7_0919200	PF3D7_1342600	0.813
PF3D7_0411000	PF3D7_0424700	0.732
PF3D7_0815000	PF3D7_1001200	0.708
PF3D7_1008800	PF3D7_1448000	0.993
PF3D7_0317200	PF3D7_1137500	0.748
PF3D7_0510500	PF3D7_0517400	0.805
PF3D7_0418600	PF3D7_0717500	0.749
PF3D7_0932100	PF3D7_1344300	0.717
PF3D7_0716800	PF3D7_0918300	0.999
PF3D7_0522600	PF3D7_0932100	0.866
PF3D7_0519400	PF3D7_0707900	0.895
PF3D7_1104900	PF3D7_1469200	0.786
PF3D7_1226300	PF3D7_1326400	0.731
PF3D7_1017900	PF3D7_1119000	0.845
PF3D7_0716100	PF3D7_1405800	0.96
PF3D7_1004000	PF3D7_1428300	0.836
PF3D7_0613400	PF3D7_1307600	0.95
PF3D7_0913900	PF3D7_1433500	0.787
PF3D7_0415900	PF3D7_1421200	0.999
PF3D7_0317600	PF3D7_0419800	0.778
PF3D7_0931000	PF3D7_1348300	0.736
PF3D7_1140400	PF3D7_1349700	0.739
PF3D7_0527200	PF3D7_1466300	0.98
PF3D7_0722200	PF3D7_1323700	0.914
PF3D7_0210000	PF3D7_1351400	0.986
PF3D7_1342000	PF3D7_1406000	0.925
PF3D7_1021500	PF3D7_1419100	0.761
PF3D7_0423500	PF3D7_1238600	0.891
PF3D7_1344800	PF3D7_1461900	0.702
PF3D7_0720100	PF3D7_1028400	0.714
PF3D7_0809600	PF3D7_1359600	0.744
PF3D7_0805700	PF3D7_1410400	0.74
PF3D7_0501500	PF3D7_0828900	0.73
PF3D7_1144900	PF3D7_1315600	0.735
PF3D7_0310400	PF3D7_0811900	0.715
PF3D7_0302200	PF3D7_0802800	0.777
PF3D7_0602400	PF3D7_1331800	0.96
PF3D7_0312800	PF3D7_1461300	0.992
PF3D7_0410800	PF3D7_1320700	0.771
PF3D7_0501400	PF3D7_0606000	0.703
PF3D7_0509100	PF3D7_1355100	0.765
PF3D7_0307100	PF3D7_1451100	0.989
PF3D7_0206200	PF3D7_1436600	0.781
PF3D7_0810300	PF3D7_0918000	0.748
PF3D7_0507700	PF3D7_0619400	0.998
PF3D7_1132800	PF3D7_1361800	0.713
PF3D7_1316200	PF3D7_1335300	0.755
PF3D7_0813100	PF3D7_1012200	0.774
[truncated: 46,821 more rows]

## Sheet: ES_network
Gene1	Gene2	Score
PF3D7_1423000	PF3D7_1471000	0.757
PF3D7_0312800	PF3D7_0419800	0.828
PF3D7_0704800	PF3D7_1209300	0.701
PF3D7_0517700	PF3D7_1461300	0.945
PF3D7_1211400	PF3D7_1344200	0.927
PF3D7_0402300	PF3D7_1037500	0.782
PF3D7_1026800	PF3D7_1309100	0.999
PF3D7_1025600	PF3D7_1430900	0.929
PF3D7_0214900	PF3D7_1435600	0.875
PF3D7_0318200	PF3D7_1012700	0.968
PF3D7_0424500	PF3D7_1353200	0.83
PF3D7_0217800	PF3D7_1341200	0.999
PF3D7_0520600	PF3D7_1472700	0.91
PF3D7_0302500	PF3D7_1027300	0.71
PF3D7_0423300	PF3D7_1035900	0.894
PF3D7_0627700	PF3D7_1130800	0.722
PF3D7_0318200	PF3D7_1234800	0.951
PF3D7_1035700	PF3D7_1125700	0.761
PF3D7_0813900	PF3D7_1308300	0.999
PF3D7_1331300	PF3D7_1331800	0.9
PF3D7_1220300	PF3D7_1315300	0.722
PF3D7_0530900	PF3D7_0932100	0.824
PF3D7_1001900	PF3D7_1102700	0.749
PF3D7_0815500	PF3D7_1117100	0.728
PF3D7_1116700	PF3D7_1408100	0.869
PF3D7_0217100	PF3D7_1456800	0.9
PF3D7_1017100	PF3D7_1128900	0.776
PF3D7_0215700	PF3D7_1130200	0.905
PF3D7_0814000	PF3D7_1026800	0.999
PF3D7_0210000	PF3D7_1461300	0.937
PF3D7_0507500	PF3D7_1035700	0.784
PF3D7_0604100	PF3D7_1012200	0.855
PF3D7_0528300	PF3D7_0730400	0.729
PF3D7_0207800	PF3D7_1143200	0.775
PF3D7_0516900	PF3D7_1366600	0.966
PF3D7_1036500	PF3D7_1037500	0.745
PF3D7_0310400	PF3D7_1121900	0.76
PF3D7_0412300	PF3D7_1350400	0.725
PF3D7_0410000	PF3D7_1229600	0.923
PF3D7_1004000	PF3D7_1433600	0.9
PF3D7_0828600	PF3D7_1463900	0.79
PF3D7_0414900	PF3D7_1017500	0.896
PF3D7_0916000	PF3D7_1332200	0.766
PF3D7_1460300	PF3D7_1460700	0.999
PF3D7_1231600	PF3D7_1450700	0.953
PF3D7_0516200	PF3D7_1212700	0.931
PF3D7_0817600	PF3D7_1459900	0.887
PF3D7_0218400	PF3D7_1463400	0.763
PF3D7_0525800	PF3D7_1401600	0.762
PF3D7_0731100	PF3D7_1221900	0.876
PF3D7_0316800	PF3D7_1007900	0.942
PF3D7_1105400	PF3D7_1408100	0.755
PF3D7_0403800	PF3D7_1251200	0.884
PF3D7_0820600	PF3D7_1235200	0.701
PF3D7_0318200	PF3D7_1126200	0.803
PF3D7_0102200	PF3D7_0104300	0.726
PF3D7_0630500	PF3D7_1445200	0.986
PF3D7_0105300	PF3D7_0414600	0.722
PF3D7_0920500	PF3D7_1125800	0.775
PF3D7_0404900	PF3D7_1346700	0.761
PF3D7_0414900	PF3D7_0507300	0.728
PF3D7_0818900	PF3D7_1347200	0.706
PF3D7_0214600	PF3D7_0620400	0.809
PF3D7_0312800	PF3D7_1330600	0.725
PF3D7_0822000	PF3D7_1431700	0.712
PF3D7_0516200	PF3D7_1406000	0.929
PF3D7_0207500	PF3D7_0903300	0.927
PF3D7_1003600	PF3D7_1335300	0.846
PF3D7_0805200	PF3D7_1035300	0.77
PF3D7_1252100	PF3D7_1310700	0.786
PF3D7_0613400	PF3D7_1450100	0.736
PF3D7_1204300	PF3D7_1408600	0.818
PF3D7_1328000	PF3D7_1348400	0.716
PF3D7_0312800	PF3D7_1424100	0.999
PF3D7_0302200	PF3D7_1252100	0.898
PF3D7_0405900	PF3D7_0522600	0.78
PF3D7_0721600	PF3D7_1447000	0.999
PF3D7_0311600	PF3D7_1338100	0.967
PF3D7_1106100	PF3D7_1426000	0.798
PF3D7_0416300	PF3D7_0910900	0.902
PF3D7_0831600	PF3D7_1223100	0.87
PF3D7_0632800	PF3D7_0808700	0.75
PF3D7_0821700	PF3D7_1246800	0.909
PF3D7_1313500	PF3D7_1423300	0.741
PF3D7_0530300	PF3D7_0924600	0.753
PF3D7_1216300	PF3D7_1351400	0.904
PF3D7_0306400	PF3D7_0307600	0.755
PF3D7_0729400	PF3D7_1352200	0.913
PF3D7_0618000	PF3D7_1140400	0.87
PF3D7_0719600	PF3D7_1245400	0.997
PF3D7_1357100	PF3D7_1441200	0.943
PF3D7_1025400	PF3D7_1137200	0.788
PF3D7_1035500	PF3D7_1036300	0.73
PF3D7_0706400	PF3D7_0719700	0.984
PF3D7_0707200	PF3D7_0811000	0.723
PF3D7_0320300	PF3D7_1007900	0.734
PF3D7_1005500	PF3D7_1431700	0.9
PF3D7_0415900	PF3D7_1308300	0.999
PF3D7_0904700	PF3D7_1215200	0.708
PF3D7_0105300	PF3D7_1356100	0.871
PF3D7_0817600	PF3D7_1232500	0.92
PF3D7_0912900	PF3D7_1225800	0.811
PF3D7_0715200	PF3D7_1315300	0.718
PF3D7_1435300	PF3D7_1462800	0.877
PF3D7_0206200	PF3D7_1323700	0.799
PF3D7_0414900	PF3D7_1125800	0.943
PF3D7_0709100	PF3D7_1015800	0.705
PF3D7_0210000	PF3D7_1004000	0.944
PF3D7_1213700	PF3D7_1472700	0.737
PF3D7_0210000	PF3D7_0719700	0.927
PF3D7_0407700	PF3D7_1223100	0.823
PF3D7_1034400	PF3D7_1211700	0.777
PF3D7_0109000	PF3D7_1345600	0.76
PF3D7_0522600	PF3D7_0813100	0.804
PF3D7_0705100	PF3D7_0715200	0.773
PF3D7_1143400	PF3D7_1468700	0.94
PF3D7_1328100	PF3D7_1470900	0.999
PF3D7_0319400	PF3D7_1417800	0.735
PF3D7_1243700	PF3D7_1316200	0.787
PF3D7_0618000	PF3D7_1003600	0.857
PF3D7_0418600	PF3D7_1037500	0.815
PF3D7_0109100	PF3D7_1007300	0.701
PF3D7_0620400	PF3D7_1116100	0.728
PF3D7_0915100	PF3D7_1365900	0.791
PF3D7_1123900	PF3D7_1323400	0.799
PF3D7_1412000	PF3D7_1431400	0.781
PF3D7_0409600	PF3D7_0706100	0.73
PF3D7_0306900	PF3D7_0904400	0.909
PF3D7_0520600	PF3D7_1366500	0.913
PF3D7_0719600	PF3D7_0827500	0.994
PF3D7_0720400	PF3D7_1450300	0.713
PF3D7_1129300	PF3D7_1325400	0.732
PF3D7_0507200	PF3D7_1307900	0.87
PF3D7_0802200	PF3D7_0916500	0.738
PF3D7_1201100	PF3D7_1433500	0.721
PF3D7_0729400	PF3D7_1124800	0.989
PF3D7_1026600	PF3D7_1316200	0.754
PF3D7_1426100	PF3D7_1428300	0.719
PF3D7_1130200	PF3D7_1206600	0.897
PF3D7_0308300	PF3D7_0613300	0.795
PF3D7_0510100	PF3D7_0630300	0.814
PF3D7_1223100	PF3D7_1310700	0.776
PF3D7_0424100	PF3D7_1327300	0.793
PF3D7_0810300	PF3D7_1232500	0.919
PF3D7_0622800	PF3D7_1331700	0.991
PF3D7_0302200	PF3D7_0407700	0.755
PF3D7_0720100	PF3D7_0825500	0.736
PF3D7_1003400	PF3D7_1341500	0.72
PF3D7_0517000	PF3D7_0706400	0.997
PF3D7_0106700	PF3D7_1027100	0.996
PF3D7_0215700	PF3D7_0610900	0.991
PF3D7_0312100	PF3D7_1322000	0.723
PF3D7_1126200	PF3D7_1137500	0.994
PF3D7_1126000	PF3D7_1336900	0.957
PF3D7_0217100	PF3D7_0715600	0.849
PF3D7_0506100	PF3D7_0516900	0.919
PF3D7_0110400	PF3D7_1431800	0.9
PF3D7_0814000	PF3D7_1132700	0.887
PF3D7_1025900	PF3D7_1128900	0.895
PF3D7_0421300	PF3D7_0426000	0.755
PF3D7_1365900	PF3D7_1429700	0.997
PF3D7_0106400	PF3D7_1125400	0.756
PF3D7_0630300	PF3D7_0904900	0.831
PF3D7_1126200	PF3D7_1206600	0.875
PF3D7_0507400	PF3D7_1022700	0.753
PF3D7_0919000	PF3D7_1105000	0.818
PF3D7_1201500	PF3D7_1230900	0.704
PF3D7_0528200	PF3D7_1358800	0.935
PF3D7_1109900	PF3D7_1302800	0.999
PF3D7_0217500	PF3D7_0302200	0.843
PF3D7_0705700	PF3D7_0814000	0.992
PF3D7_0515700	PF3D7_0525800	0.738
PF3D7_0522600	PF3D7_0704500	0.771
PF3D7_0509100	PF3D7_1145400	0.702
PF3D7_0415900	PF3D7_1123400	0.982
PF3D7_0423300	PF3D7_0507200	0.793
PF3D7_0214700	PF3D7_1037500	0.778
PF3D7_0102200	PF3D7_1401400	0.873
PF3D7_0507500	PF3D7_1035900	0.87
PF3D7_0307200	PF3D7_0719700	0.938
PF3D7_1107400	PF3D7_1347100	0.976
PF3D7_0414900	PF3D7_1435600	0.808
PF3D7_1241800	PF3D7_1304900	0.925
PF3D7_0818900	PF3D7_0907700	0.922
PF3D7_0522300	PF3D7_1124800	0.761
PF3D7_0507500	PF3D7_1126700	0.951
PF3D7_1323100	PF3D7_1429700	0.999
PF3D7_1121300	PF3D7_1211700	0.765
PF3D7_0808400	PF3D7_1145100	0.994
PF3D7_1118200	PF3D7_1229500	0.846
PF3D7_1132700	PF3D7_1424400	0.736
PF3D7_0914100	PF3D7_1229800	0.879
PF3D7_1116100	PF3D7_1439500	0.746
PF3D7_0803700	PF3D7_1472200	0.769
PF3D7_0105300	PF3D7_1224100	0.901
PF3D7_1222700	PF3D7_1229800	0.835
PF3D7_0705400	PF3D7_1318400	0.788
PF3D7_0916700	PF3D7_1465400	0.716
PF3D7_0214700	PF3D7_0620400	0.855
PF3D7_1401400	PF3D7_1404800	0.887
PF3D7_0302500	PF3D7_0918000	0.806
PF3D7_0908400	PF3D7_1137500	0.775
PF3D7_0916000	PF3D7_1439500	0.715
PF3D7_0407800	PF3D7_1318000	0.743
PF3D7_1104200	PF3D7_1143300	0.939
PF3D7_0214600	PF3D7_1036000	0.931
PF3D7_0207000	PF3D7_0930300	0.855
PF3D7_1229800	PF3D7_1235200	0.778
PF3D7_0203200	PF3D7_1446600	0.898
PF3D7_0704100	PF3D7_1140600	0.763
PF3D7_0931100	PF3D7_1419100	0.953
PF3D7_0419400	PF3D7_0501500	0.734
PF3D7_0503800	PF3D7_0826700	0.972
PF3D7_1315300	PF3D7_1410400	0.727
PF3D7_1003500	PF3D7_1461200	0.996
PF3D7_0813900	PF3D7_1407100	0.792
PF3D7_0419400	PF3D7_1406800	0.769
PF3D7_0319600	PF3D7_1309100	0.754
PF3D7_0934800	PF3D7_1315300	0.835
PF3D7_0210600	PF3D7_1025400	0.753
PF3D7_0725400	PF3D7_1401600	0.726
PF3D7_1126700	PF3D7_1410400	0.9
PF3D7_1107100	PF3D7_1471400	0.75
PF3D7_0108600	PF3D7_1216900	0.721
PF3D7_1138400	PF3D7_1431800	0.913
PF3D7_0302200	PF3D7_0911100	0.723
PF3D7_1035900	PF3D7_1412000	0.845
PF3D7_0932200	PF3D7_1361700	0.737
PF3D7_0204100	PF3D7_1009700	0.762
PF3D7_0904800	PF3D7_1317100	0.956
PF3D7_0831400	PF3D7_1149400	0.742
PF3D7_1212900	PF3D7_1441400	0.804
PF3D7_0903900	PF3D7_1419700	0.737
PF3D7_0713800	PF3D7_1323700	0.701
PF3D7_0715200	PF3D7_1247500	0.725
PF3D7_1025400	PF3D7_1308000	0.736
PF3D7_0508100	PF3D7_1128900	0.852
PF3D7_0404700	PF3D7_1313600	0.781
PF3D7_0929400	PF3D7_1410400	0.977
PF3D7_0508100	PF3D7_1003100	0.77
PF3D7_0611000	PF3D7_1331300	0.74
PF3D7_1007300	PF3D7_1335400	0.777
PF3D7_0516200	PF3D7_0710900	0.907
PF3D7_0308900	PF3D7_1027400	0.9
PF3D7_0217800	PF3D7_1358800	0.999
PF3D7_0707300	PF3D7_1327500	0.727
PF3D7_0820600	PF3D7_0908400	0.76
PF3D7_0722600	PF3D7_1237600	0.781
PF3D7_0820700	PF3D7_0920800	0.825
PF3D7_1341200	PF3D7_1424400	0.999
PF3D7_0303300	PF3D7_0822800	0.92
PF3D7_1149600	PF3D7_1436300	0.909
PF3D7_0301800	PF3D7_1404800	0.792
PF3D7_0303700	PF3D7_0504600	0.998
PF3D7_0317600	PF3D7_0507100	0.999
PF3D7_0503600	PF3D7_1009700	0.703
PF3D7_0417200	PF3D7_1466100	0.865
PF3D7_0728100	PF3D7_1358000	0.763
PF3D7_0932000	PF3D7_1236900	0.777
PF3D7_0827000	PF3D7_1344900	0.72
PF3D7_0719500	PF3D7_1471400	0.752
PF3D7_0608800	PF3D7_0623000	0.766
PF3D7_1203000	PF3D7_1211300	0.997
PF3D7_0615700	PF3D7_1249800	0.89
PF3D7_1211800	PF3D7_1235600	0.779
PF3D7_0802600	PF3D7_1315300	0.706
PF3D7_1206200	PF3D7_1213900	0.713
PF3D7_1140400	PF3D7_1323700	0.9
PF3D7_0415900	PF3D7_1365900	0.999
PF3D7_0715200	PF3D7_0919900	0.844
PF3D7_0721600	PF3D7_1229500	0.783
PF3D7_0813100	PF3D7_0916000	0.897
PF3D7_0902100	PF3D7_1146600	0.719
PF3D7_0518500	PF3D7_1030100	0.823
PF3D7_1143200	PF3D7_1232500	0.717
PF3D7_1136200	PF3D7_1423300	0.893
PF3D7_1130200	PF3D7_1142600	0.999
PF3D7_0423100	PF3D7_0905900	0.772
PF3D7_1307600	PF3D7_1323100	0.941
PF3D7_1126900	PF3D7_1414800	0.999
PF3D7_1239800	PF3D7_1328000	0.742
PF3D7_0918900	PF3D7_1435300	0.813
PF3D7_0907700	PF3D7_1248900	0.959
PF3D7_0715200	PF3D7_1121300	0.756
PF3D7_0630300	PF3D7_0715900	0.866
PF3D7_0423800	PF3D7_1116100	0.745
PF3D7_1234800	PF3D7_1243100	0.737
PF3D7_0307200	PF3D7_0721600	0.993
PF3D7_1136900	PF3D7_1473400	0.786
PF3D7_0805700	PF3D7_1435300	0.779
PF3D7_0306900	PF3D7_1245400	0.958
PF3D7_0904400	PF3D7_1109900	0.905
PF3D7_1142600	PF3D7_1424400	0.999
PF3D7_1238600	PF3D7_1435300	0.779
PF3D7_1301400	PF3D7_1370300	0.922
PF3D7_1123900	PF3D7_1225500	0.847
PF3D7_1133000	PF3D7_1223100	0.766
PF3D7_0302600	PF3D7_0923200	0.777
PF3D7_0412100	PF3D7_1351400	0.974
PF3D7_0618000	PF3D7_1138000	0.72
PF3D7_0403800	PF3D7_1436600	0.722
PF3D7_1118200	PF3D7_1412500	0.923
PF3D7_1117100	PF3D7_1320100	0.718
PF3D7_1322100	PF3D7_1358900	0.748
PF3D7_0204500	PF3D7_0802000	0.839
PF3D7_0932000	PF3D7_1301600	0.722
PF3D7_0419400	PF3D7_0934800	0.756
PF3D7_1246200	PF3D7_1361400	0.965
PF3D7_1001600	PF3D7_1439000	0.725
PF3D7_0527200	PF3D7_1033700	0.91
PF3D7_0308100	PF3D7_0508100	0.779
PF3D7_1437200	PF3D7_1463300	0.758
PF3D7_0516900	PF3D7_1026800	0.999
PF3D7_1022700	PF3D7_1128900	0.713
PF3D7_0423500	PF3D7_1223000	0.771
PF3D7_0916000	PF3D7_1125700	0.789
PF3D7_0629200	PF3D7_0811400	0.76
PF3D7_1212800	PF3D7_1430900	0.921
PF3D7_0203600	PF3D7_0307600	0.73
PF3D7_0820700	PF3D7_1235700	0.765
PF3D7_0204100	PF3D7_0410700	0.799
PF3D7_0304100	PF3D7_0908500	0.831
PF3D7_1025400	PF3D7_1361800	0.809
PF3D7_0615500	PF3D7_1004200	0.712
PF3D7_0818900	PF3D7_1443900	0.949
PF3D7_1331300	PF3D7_1366500	0.709
PF3D7_0520600	PF3D7_1138400	0.9
PF3D7_1436200	PF3D7_1452000	0.768
PF3D7_0306900	PF3D7_0605000	0.961
PF3D7_0527000	PF3D7_0910900	0.809
PF3D7_0811900	PF3D7_1335700	0.758
PF3D7_0811600	PF3D7_1223100	0.709
PF3D7_1140400	PF3D7_1455300	0.753
PF3D7_1132700	PF3D7_1323400	0.999
PF3D7_1009700	PF3D7_1323700	0.902
PF3D7_1235200	PF3D7_1315300	0.752
PF3D7_1410600	PF3D7_1447000	0.948
PF3D7_0423800	PF3D7_1417400	0.75
PF3D7_0215700	PF3D7_0822000	0.91
PF3D7_0917600	PF3D7_1414800	0.715
PF3D7_1022700	PF3D7_1472600	0.812
PF3D7_0309600	PF3D7_1144000	0.995
PF3D7_1231600	PF3D7_1474500	0.96
PF3D7_1125500	PF3D7_1364800	0.944
PF3D7_1119600	PF3D7_1413500	0.731
PF3D7_0312800	PF3D7_0611700	0.999
PF3D7_1035900	PF3D7_1140400	0.877
PF3D7_0514300	PF3D7_0603700	0.742
PF3D7_0723800	PF3D7_1409300	0.8
PF3D7_1204300	PF3D7_1404100	0.835
PF3D7_0207800	PF3D7_1320700	0.765
PF3D7_0206600	PF3D7_0721300	0.922
PF3D7_1132700	PF3D7_1330600	0.912
PF3D7_0821700	PF3D7_1132700	0.785
PF3D7_0501400	PF3D7_1148900	0.768
PF3D7_0507200	PF3D7_1209500.2	0.766
PF3D7_0216800	PF3D7_1145200	0.797
PF3D7_0506900	PF3D7_1003400	0.713
PF3D7_1118100	PF3D7_1455500	0.913
PF3D7_1124900	PF3D7_1351400	0.999
PF3D7_1025900	PF3D7_1033900	0.715
PF3D7_1012200	PF3D7_1436600	0.853
PF3D7_0814000	PF3D7_1302800	0.999
PF3D7_0508500	PF3D7_1022700	0.726
PF3D7_0914500	PF3D7_1448500	0.742
PF3D7_0422300	PF3D7_0903200	0.831
PF3D7_0102500	PF3D7_0920700	0.765
PF3D7_0308700	PF3D7_1206000	0.812
PF3D7_0501200	PF3D7_0928600	0.712
PF3D7_1203000	PF3D7_1211700	0.999
PF3D7_0317200	PF3D7_0704100	0.783
PF3D7_0508100	PF3D7_1410800	0.716
PF3D7_1037500	PF3D7_1472600	0.904
PF3D7_0831600	PF3D7_1236900	0.87
PF3D7_0403700	PF3D7_1443300	0.967
PF3D7_0903200	PF3D7_0903700	0.857
PF3D7_0622200	PF3D7_1434600	0.731
PF3D7_0522600	PF3D7_0810300	0.747
PF3D7_0217800	PF3D7_0511000	0.706
PF3D7_0528400	PF3D7_0934800	0.913
PF3D7_1020900	PF3D7_1320600	0.829
PF3D7_0930400.2	PF3D7_1216900	0.768
PF3D7_0702500	PF3D7_1306200	0.939
PF3D7_1424400	PF3D7_1431700	0.999
PF3D7_1428300	PF3D7_1447000	0.837
PF3D7_0716100	PF3D7_0811900	0.85
PF3D7_1245400	PF3D7_1424400	0.725
PF3D7_0207800	PF3D7_1223100	0.755
PF3D7_0805700	PF3D7_1467900	0.733
PF3D7_0306900	PF3D7_0307200	0.994
PF3D7_1012200	PF3D7_1252100	0.91
PF3D7_0719600	PF3D7_1341200	0.999
PF3D7_0630300	PF3D7_0725000	0.854
PF3D7_0630900	PF3D7_1230600	0.871
PF3D7_0318200	PF3D7_1431800	0.9
PF3D7_0318200	PF3D7_0517300	0.938
PF3D7_0721600	PF3D7_1003800	0.982
PF3D7_0903300	PF3D7_1458300	0.737
PF3D7_0515700	PF3D7_0723300	0.79
PF3D7_0727200	PF3D7_0921200	0.709
PF3D7_0519100	PF3D7_1317800	0.999
PF3D7_0501800	PF3D7_1318400	0.784
PF3D7_0305600	PF3D7_0312400	0.738
PF3D7_0405900	PF3D7_1252100	0.937
PF3D7_0921800	PF3D7_1106000	0.714
PF3D7_0606700	PF3D7_1020900	0.943
PF3D7_0204100	PF3D7_1029900	0.869
PF3D7_0310400	PF3D7_1220300	0.716
PF3D7_0810300	PF3D7_0831600	0.841
PF3D7_0708100	PF3D7_0820000	0.924
PF3D7_1003600	PF3D7_1037500	0.761
PF3D7_0629600	PF3D7_1109400	0.705
PF3D7_0517000	PF3D7_0904400	0.904
PF3D7_1323400	PF3D7_1434600	0.818
PF3D7_0503400	PF3D7_1132800	0.77
PF3D7_0817600	PF3D7_1303500	0.722
PF3D7_0102500	PF3D7_1337800	0.954
PF3D7_0934500	PF3D7_1306600	0.999
PF3D7_0407700	PF3D7_1327500	0.793
PF3D7_0316000	PF3D7_1342600	0.89
PF3D7_0423300	PF3D7_0515700	0.897
PF3D7_0404000	PF3D7_0919200	0.832
PF3D7_1128900	PF3D7_1435300	0.717
PF3D7_0419800	PF3D7_0721600	0.87
PF3D7_0613900	PF3D7_1204900	0.72
PF3D7_0312400	PF3D7_1317100	0.733
PF3D7_0506100	PF3D7_1124900	0.934
PF3D7_0312800	PF3D7_1348300	0.935
PF3D7_1035900	PF3D7_1128900	0.777
PF3D7_0604100	PF3D7_1122700	0.747
PF3D7_0302200	PF3D7_1344300	0.907
PF3D7_0302000	PF3D7_0619900	0.72
PF3D7_1215300	PF3D7_1443900	0.94
PF3D7_0522300	PF3D7_1461200	0.705
PF3D7_1110600	PF3D7_1210000	0.999
PF3D7_1015900	PF3D7_1408100	0.893
PF3D7_0802800	PF3D7_1003100	0.767
PF3D7_0106000	PF3D7_1019500.2	0.722
PF3D7_0212300	PF3D7_1460300	0.9
PF3D7_0604100	PF3D7_1437300	0.87
PF3D7_0803800	PF3D7_0807500	0.999
PF3D7_1353800	PF3D7_1466300	0.997
PF3D7_0617800	PF3D7_1433500	0.838
PF3D7_0802600	PF3D7_1222700	0.778
PF3D7_1237700	PF3D7_1364100	0.776
PF3D7_1331800	PF3D7_1428300	0.776
PF3D7_0310400	PF3D7_0604100	0.836
PF3D7_0424500	PF3D7_1436300	0.814
PF3D7_0921200	PF3D7_1465300	0.764
PF3D7_0321100	PF3D7_1143200	0.73
PF3D7_0414700	PF3D7_1332800	0.931
PF3D7_0610400	PF3D7_0714000	0.967
PF3D7_0611700	PF3D7_1426000	0.999
PF3D7_1130000	PF3D7_1433500	0.78
PF3D7_0516800	PF3D7_1325400	0.87
PF3D7_0303000	PF3D7_0912900	0.84
PF3D7_0812500	PF3D7_1472200	0.713
PF3D7_1329300	PF3D7_1333700	0.818
PF3D7_1308200	PF3D7_1435300	0.997
PF3D7_1030200	PF3D7_1251200	0.949
PF3D7_0419800	PF3D7_1414300	0.737
PF3D7_1015900	PF3D7_1126200	0.808
PF3D7_0424100	PF3D7_0501600	0.833
PF3D7_1353700	PF3D7_1426100	0.706
PF3D7_0613400	PF3D7_0821700	0.853
PF3D7_0613800	PF3D7_1001600	0.87
PF3D7_1204300	PF3D7_1468700	0.967
PF3D7_1433500	PF3D7_1461900	0.809
PF3D7_0102900	PF3D7_1441200	0.735
PF3D7_0803200	PF3D7_1035100	0.874
PF3D7_1248900	PF3D7_1368100	0.999
PF3D7_0528400	PF3D7_1243700	0.876
PF3D7_0506100	PF3D7_1332800	0.984
PF3D7_1222700	PF3D7_1232500	0.795
PF3D7_0525800	PF3D7_0808200	0.919
PF3D7_0909600	PF3D7_1422500	0.702
PF3D7_0400400	PF3D7_0800300	0.87
PF3D7_0316000	PF3D7_0323400	0.797
PF3D7_0307200	PF3D7_1450100	0.766
PF3D7_0917500	PF3D7_1417800	0.704
PF3D7_0613900	PF3D7_1035700	0.844
PF3D7_1020800	PF3D7_1312600	0.954
PF3D7_0920800	PF3D7_1461900	0.907
PF3D7_0704500	PF3D7_1453200	0.744
PF3D7_0204100	PF3D7_0707300	0.809
PF3D7_0713800	PF3D7_0828600	0.717
PF3D7_1323700	PF3D7_1335100	0.909
PF3D7_1109400	PF3D7_1217200	0.949
PF3D7_0306900	PF3D7_0516900	0.999
PF3D7_0529800	PF3D7_1448500	0.739
PF3D7_0501400	PF3D7_0918700	0.724
PF3D7_0628100	PF3D7_1342600	0.748
PF3D7_0314900	PF3D7_0705100	0.723
PF3D7_1358800	PF3D7_1426100	0.807
PF3D7_0522400	PF3D7_1003100	0.84
PF3D7_0403800	PF3D7_0628100	0.811
PF3D7_1103100	PF3D7_1309100	0.999
PF3D7_1225800	PF3D7_1350400	0.76
PF3D7_0409200	PF3D7_0716100	0.797
PF3D7_0405900	PF3D7_0407700	0.883
PF3D7_1025900	PF3D7_1452000	0.87
PF3D7_0218600	PF3D7_0924000	0.701
PF3D7_0110400	PF3D7_1008000	0.703
PF3D7_0826700	PF3D7_1357800	0.909
PF3D7_1136900	PF3D7_1318700	0.774
PF3D7_0405900	PF3D7_1035300	0.91
PF3D7_0318700	PF3D7_1335400	0.915
PF3D7_0926100	PF3D7_1309200	0.801
PF3D7_0409400	PF3D7_0608700	0.789
PF3D7_0506100	PF3D7_1460300	0.897
PF3D7_0206700	PF3D7_1329400	0.926
PF3D7_0423300	PF3D7_1332200	0.895
PF3D7_0416100	PF3D7_0514300	0.795
PF3D7_0904400	PF3D7_1323400	0.9
PF3D7_0402000	PF3D7_0424000	0.723
PF3D7_0202500	PF3D7_1115800	0.819
PF3D7_0532300	PF3D7_1370300	0.769
PF3D7_1020900	PF3D7_1145100	0.982
PF3D7_0321100	PF3D7_1017100	0.748
PF3D7_0604100	PF3D7_1035100	0.87
PF3D7_0409100	PF3D7_1319300	0.78
PF3D7_0520000	PF3D7_0718400	0.727
PF3D7_0501600	PF3D7_1252400	0.755
PF3D7_0524000	PF3D7_1407100	0.749
PF3D7_0308300	PF3D7_0920500	0.876
PF3D7_0218400	PF3D7_1225500	0.799
PF3D7_1230900	PF3D7_1353200	0.771
PF3D7_0317200	PF3D7_1343100	0.745
PF3D7_0802800	PF3D7_1348600	0.77
PF3D7_0517300	PF3D7_0909800	0.944
PF3D7_1016000	PF3D7_1423300	0.886
PF3D7_0405900	PF3D7_0919200	0.773
PF3D7_0420000	PF3D7_0915100	0.947
PF3D7_1201500	PF3D7_1235900	0.706
PF3D7_0930300	PF3D7_1301600	0.781
PF3D7_0817700	PF3D7_0917300	0.748
PF3D7_0211800	PF3D7_0603700	0.742
PF3D7_0705700	PF3D7_1109900	0.999
PF3D7_0613400	PF3D7_0904700	0.87
PF3D7_0419700	PF3D7_1423300	0.858
PF3D7_0106700	PF3D7_1451900	0.945
PF3D7_1010200	PF3D7_1018200	0.828
PF3D7_0503800	PF3D7_1426000	0.999
PF3D7_0210000	PF3D7_0507100	0.985
PF3D7_0904800	PF3D7_1417800	0.931
PF3D7_0411400	PF3D7_1366500	0.929
PF3D7_1347500	PF3D7_1408100	0.772
PF3D7_0704100	PF3D7_1140400	0.831
PF3D7_0613300	PF3D7_1036000	0.803
PF3D7_0509800	PF3D7_1434200	0.711
PF3D7_0503400	PF3D7_1223100	0.871
PF3D7_0814000	PF3D7_1413400	0.83
PF3D7_0516900	PF3D7_0813900	0.999
PF3D7_0308300	PF3D7_0628100	0.724
PF3D7_0628100	PF3D7_1138000	0.815
PF3D7_1247900	PF3D7_1323900	0.771
PF3D7_0419400	PF3D7_1346900	0.747
PF3D7_0708100	PF3D7_1461600	0.922
PF3D7_0414000	PF3D7_0716300	0.709
PF3D7_0827000	PF3D7_1011800	0.734
PF3D7_0105800	PF3D7_1306200	0.736
PF3D7_1122700	PF3D7_1471400	0.713
PF3D7_0804500	PF3D7_1311900	0.947
PF3D7_0419700	PF3D7_1313600	0.759
PF3D7_0916700	PF3D7_1248900	0.9
PF3D7_0805700	PF3D7_1439400	0.759
PF3D7_0817700	PF3D7_1344300	0.88
PF3D7_0404700	PF3D7_1469200	0.905
PF3D7_0907900	PF3D7_0922200	0.948
PF3D7_1132900	PF3D7_1435300	0.799
PF3D7_0707300	PF3D7_0822900	0.751
PF3D7_1351100	PF3D7_1438900	0.838
PF3D7_0613900	PF3D7_1130700	0.71
PF3D7_0217500	PF3D7_0506900	0.771
PF3D7_0410700	PF3D7_0805700	0.87
PF3D7_0301800	PF3D7_0936300	0.72
PF3D7_0204100	PF3D7_0530900	0.779
PF3D7_0415600	PF3D7_1119800	0.803
PF3D7_1129300	PF3D7_1423300	0.744
PF3D7_0613800	PF3D7_1325400	0.87
PF3D7_0512700	PF3D7_1325100	0.954
PF3D7_1119600	PF3D7_1414900	0.892
PF3D7_0527000	PF3D7_1412100	0.713
PF3D7_0511800	PF3D7_1104200	0.829
PF3D7_1206000	PF3D7_1235200	0.751
PF3D7_1104900	PF3D7_1223100	0.837
PF3D7_1210700	PF3D7_1346900	0.711
PF3D7_1030500	PF3D7_1414000	0.992
PF3D7_1110200	PF3D7_1243100	0.801
PF3D7_1037500	PF3D7_1342600	0.867
PF3D7_0407800	PF3D7_0707300	0.87
PF3D7_0704500	PF3D7_0802100	0.894
PF3D7_0215700	PF3D7_1245400	0.897
PF3D7_0618300	PF3D7_1034200	0.873
PF3D7_1439900	PF3D7_1462800	0.999
PF3D7_0802600	PF3D7_1361400	0.741
PF3D7_0919400	PF3D7_1358000	0.735
PF3D7_0108600	PF3D7_0816600	0.753
PF3D7_0705100	PF3D7_1313600	0.759
PF3D7_1129000	PF3D7_1242700	0.785
PF3D7_1223800	PF3D7_1345700	0.723
PF3D7_1116800	PF3D7_1433500	0.871
PF3D7_0508100	PF3D7_0615500	0.737
PF3D7_0911100	PF3D7_1136900	0.976
PF3D7_1001600	PF3D7_1224100	0.742
PF3D7_0818900	PF3D7_1030100	0.761
PF3D7_0309600	PF3D7_0415900	0.999
PF3D7_0532300	PF3D7_0621200	0.728
PF3D7_0501600	PF3D7_1243700	0.845
PF3D7_0604100	PF3D7_0806300	0.87
PF3D7_0503300	PF3D7_1224900	0.9
PF3D7_0306300	PF3D7_1457200	0.986
PF3D7_0810300	PF3D7_1204900	0.784
PF3D7_0206000	PF3D7_0706700	0.863
PF3D7_0803200	PF3D7_1146600	0.718
PF3D7_0417200	PF3D7_1447900	0.72
PF3D7_0503600	PF3D7_1035300	0.862
PF3D7_0905500	PF3D7_0929400	0.822
PF3D7_0932000	PF3D7_1017100	0.721
PF3D7_0516200	PF3D7_1226700	0.729
PF3D7_0515700	PF3D7_0930300	0.89
PF3D7_0317600	PF3D7_0705700	0.999
PF3D7_0417200	PF3D7_1232300	0.724
PF3D7_0707200	PF3D7_0926500	0.713
PF3D7_0113700	PF3D7_0708400	0.857
PF3D7_0704100	PF3D7_0723800	0.767
PF3D7_0312300	PF3D7_1368100	0.999
PF3D7_0203700	PF3D7_0827000	0.829
PF3D7_0210700	PF3D7_0424100	0.78
PF3D7_0310400	PF3D7_1228300	0.712
PF3D7_0308600	PF3D7_1306900	0.786
PF3D7_0110800	PF3D7_1443300	0.89
PF3D7_0216800	PF3D7_0613800	0.865
PF3D7_1030200	PF3D7_1351700	0.928
PF3D7_0711000	PF3D7_1116800	0.711
PF3D7_0323400	PF3D7_1149200	0.746
PF3D7_0930300	PF3D7_1436600	0.885
PF3D7_0821000	PF3D7_1234900	0.795
PF3D7_0515400	PF3D7_1028700	0.755
PF3D7_0207500	PF3D7_1323700	0.875
PF3D7_1012200	PF3D7_1423300	0.89
PF3D7_1143200	PF3D7_1322500	0.77
PF3D7_0508100	PF3D7_1031400.2	0.716
PF3D7_1419800.2	PF3D7_1431600	0.876
PF3D7_0312800	PF3D7_1304900	0.776
PF3D7_0302500	PF3D7_0919900	0.746
PF3D7_1209900	PF3D7_1368700	0.748
PF3D7_0302000	PF3D7_0403700	0.994
PF3D7_0828600	PF3D7_1037500	0.739
PF3D7_0614900	PF3D7_1327400	0.712
PF3D7_0317200	PF3D7_0719400	0.737
PF3D7_0935500	PF3D7_0936400	0.752
PF3D7_0306800	PF3D7_1003500	0.803
PF3D7_0821700	PF3D7_1142600	0.999
PF3D7_1330800	PF3D7_1357700	0.703
PF3D7_0708400	PF3D7_1015600	0.949
PF3D7_0501500	PF3D7_0813100	0.763
PF3D7_1139700	PF3D7_1435000	0.769
PF3D7_1014100	PF3D7_1035500	0.912
PF3D7_0508000	PF3D7_1116100	0.859
PF3D7_0630400	PF3D7_1019600	0.744
PF3D7_1203400	PF3D7_1417800	0.702
PF3D7_0507100	PF3D7_0602400	0.956
PF3D7_0302500	PF3D7_0725400	0.752
PF3D7_0524000	PF3D7_1428300	0.812
PF3D7_0710900	PF3D7_0821700	0.806
PF3D7_1132200	PF3D7_1325100	0.887
PF3D7_0727800	PF3D7_1211800	0.773
PF3D7_0315400	PF3D7_0728800	0.741
PF3D7_1017500	PF3D7_1115800	0.783
PF3D7_1124600	PF3D7_1401800	0.705
PF3D7_0217500	PF3D7_1468400	0.847
PF3D7_0628100	PF3D7_1313500	0.865
PF3D7_0802800	PF3D7_1430200	0.755
PF3D7_0722200	PF3D7_1348600	0.719
PF3D7_1027100	PF3D7_1404500	0.997
PF3D7_0905500	PF3D7_0908500	0.709
PF3D7_0508100	PF3D7_0604100	0.87
PF3D7_0217500	PF3D7_0920700	0.799
PF3D7_0303200	PF3D7_1009700	0.719
PF3D7_0504400	PF3D7_1307600	0.948
PF3D7_0803800	PF3D7_1129200	0.999
PF3D7_0107800	PF3D7_0525200	0.816
PF3D7_0821700	PF3D7_1408600	0.99
PF3D7_0504400	PF3D7_1235600	0.737
PF3D7_0604100	PF3D7_0613800	0.89
PF3D7_0924600	PF3D7_1114900	0.712
PF3D7_0206000	PF3D7_1244200	0.756
PF3D7_1211800	PF3D7_1353900	0.826
PF3D7_0530900	PF3D7_0607700	0.87
PF3D7_0414700	PF3D7_1469300	0.96
PF3D7_1356300	PF3D7_1410400	0.72
PF3D7_0705100	PF3D7_0707300	0.727
PF3D7_1125400	PF3D7_1344200	0.846
PF3D7_1016000	PF3D7_1243700	0.897
PF3D7_0517000	PF3D7_1358800	0.999
PF3D7_1306200	PF3D7_1348500	0.736
PF3D7_0317200	PF3D7_0803400	0.817
PF3D7_0423500	PF3D7_1327500	0.706
PF3D7_0932200	PF3D7_1364100	0.722
PF3D7_0716800	PF3D7_0719700	0.956
PF3D7_0717500	PF3D7_0810300	0.889
PF3D7_1026800	PF3D7_1216300	0.909
PF3D7_0308700	PF3D7_1108100	0.706
PF3D7_0517700	PF3D7_0519400	0.962
PF3D7_0105300	PF3D7_1019100	0.777
PF3D7_0204500	PF3D7_0918900	0.8
PF3D7_1209300	PF3D7_1467900	0.778
PF3D7_0929400	PF3D7_1222700	0.93
PF3D7_0110700	PF3D7_1361900	0.863
PF3D7_1346900	PF3D7_1439000	0.701
PF3D7_0415900	PF3D7_1003800	0.746
PF3D7_0321400	PF3D7_1431500	0.857
PF3D7_0905500	PF3D7_0932100	0.747
PF3D7_1123400	PF3D7_1424100	0.986
PF3D7_0821000	PF3D7_1306200	0.768
PF3D7_1404500	PF3D7_1469300	0.938
PF3D7_0926500	PF3D7_0927300	0.769
PF3D7_0918000	PF3D7_1214100	0.713
PF3D7_0508900	PF3D7_0930300	0.707
PF3D7_0814300	PF3D7_1445200	0.791
PF3D7_0920200	PF3D7_1303800	0.887
PF3D7_1033600	PF3D7_1235900	0.995
PF3D7_1206600	PF3D7_1357800	0.776
PF3D7_1238000	PF3D7_1436600	0.721
PF3D7_0708400	PF3D7_1434200	0.903
PF3D7_0623200	PF3D7_1430900	0.961
PF3D7_0710600	PF3D7_1245400	0.828
PF3D7_0530900	PF3D7_1435600	0.813
PF3D7_0615500	PF3D7_1234300	0.781
PF3D7_0423300	PF3D7_1232500	0.901
PF3D7_0217500	PF3D7_0220800	0.777
PF3D7_0510500	PF3D7_1212800	0.729
PF3D7_0920800	PF3D7_1436000	0.799
PF3D7_0626800	PF3D7_1307600	0.928
PF3D7_0207800	PF3D7_1035100	0.88
PF3D7_0520000	PF3D7_1105400	0.999
PF3D7_1311900	PF3D7_1357800	0.842
PF3D7_0207000	PF3D7_1223100	0.763
PF3D7_1311500	PF3D7_1357100	0.813
PF3D7_0309200	PF3D7_0615500	0.837
PF3D7_0618300	PF3D7_1451100	0.995
PF3D7_0605800	PF3D7_1306400	0.706
PF3D7_0306900	PF3D7_1415800	0.777
PF3D7_0207500	PF3D7_1361800	0.749
PF3D7_0903200	PF3D7_1352800	0.992
PF3D7_0501100.2	PF3D7_0731100	0.783
PF3D7_0203200	PF3D7_0629300	0.811
PF3D7_0503800	PF3D7_1312900	0.917
PF3D7_0532100	PF3D7_1426100	0.711
PF3D7_1128900	PF3D7_1472600	0.83
PF3D7_0404900	PF3D7_1361800	0.886
PF3D7_0416500	PF3D7_1449100	0.761
PF3D7_1022700	PF3D7_1412000	0.872
PF3D7_0320300	PF3D7_1012600	0.95
PF3D7_0817700	PF3D7_1007200	0.897
PF3D7_0722200	PF3D7_0810300	0.85
PF3D7_0105300	PF3D7_1029900	0.891
PF3D7_0518300	PF3D7_0807500	0.999
PF3D7_0312800	PF3D7_1106100	0.815
PF3D7_1351400	PF3D7_1421200	0.999
PF3D7_0517700	PF3D7_1350100	0.804
PF3D7_0300100	PF3D7_0808600	0.74
PF3D7_0417200	PF3D7_1132700	0.72
PF3D7_1001600	PF3D7_1228600	0.747
PF3D7_0720400	PF3D7_0915000	0.701
PF3D7_0706100	PF3D7_1001600	0.789
PF3D7_1327800	PF3D7_1433500	0.81
PF3D7_1031200	PF3D7_1455300	0.744
PF3D7_0218700	PF3D7_0308600	0.992
PF3D7_0707300	PF3D7_1037500	0.836
PF3D7_1145200	PF3D7_1236900	0.818
PF3D7_0613800	PF3D7_1228600	0.87
PF3D7_1003600	PF3D7_1016000	0.705
PF3D7_0628100	PF3D7_1035900	0.87
PF3D7_1137500	PF3D7_1455700	0.703
PF3D7_0916000	PF3D7_1235200	0.949
PF3D7_1028200	PF3D7_1214100	0.766
PF3D7_0913800	PF3D7_1316200	0.766
PF3D7_1366600	PF3D7_1460700	0.91
PF3D7_1123400	PF3D7_1412500	0.874
PF3D7_0917600	PF3D7_1235900	0.827
PF3D7_0817700	PF3D7_0934800	0.919
PF3D7_0318200	PF3D7_1330600	0.777
PF3D7_0508100	PF3D7_0607700	0.87
PF3D7_0704500	PF3D7_1025400	0.729
PF3D7_0612900	PF3D7_0630900	0.898
PF3D7_1035300	PF3D7_1332200	0.896
PF3D7_0322500	PF3D7_1214600	0.907
PF3D7_1007200	PF3D7_1307900	0.728
PF3D7_0407700	PF3D7_1461400	0.715
PF3D7_0501500	PF3D7_1232500	0.854
PF3D7_1304900	PF3D7_1341900	0.73
PF3D7_0920800	PF3D7_1433500	0.808
PF3D7_0630900	PF3D7_1419100	0.794
PF3D7_0206000	PF3D7_0726300	0.855
PF3D7_0816600	PF3D7_1108700	0.76
PF3D7_0312400	PF3D7_0629800	0.722
PF3D7_0918000	PF3D7_0930300	0.836
PF3D7_0219200	PF3D7_1341300	0.999
PF3D7_1107400	PF3D7_1411400	0.947
PF3D7_1222400	PF3D7_1317200	0.751
PF3D7_0312100	PF3D7_0815500	0.732
PF3D7_0520900	PF3D7_0922200	0.993
PF3D7_0630300	PF3D7_0728100	0.819
PF3D7_1143200	PF3D7_1327400	0.81
PF3D7_0613400	PF3D7_1323400	0.999
PF3D7_0511200	PF3D7_0927300	0.76
PF3D7_0911100	PF3D7_1335400	0.921
PF3D7_0522500	PF3D7_1323400	0.955
PF3D7_0619400	PF3D7_1422500	0.95
PF3D7_0512200	PF3D7_0606900	0.803
PF3D7_0615500	PF3D7_1355100	0.922
PF3D7_1344300	PF3D7_1361800	0.87
PF3D7_0820700	PF3D7_1211700	0.75
PF3D7_1116100	PF3D7_1412000	0.94
PF3D7_1132700	PF3D7_1346100	0.883
PF3D7_1019600	PF3D7_1313600	0.729
PF3D7_0404700	PF3D7_0613300	0.87
PF3D7_1035700	PF3D7_1310700	0.707
PF3D7_0720400	PF3D7_1015600	0.76
PF3D7_1144500	PF3D7_1360700	0.803
PF3D7_0207500	PF3D7_1138400	0.8
PF3D7_1009700	PF3D7_1013800	0.914
PF3D7_0629700	PF3D7_0726500	0.738
PF3D7_0305700	PF3D7_1361900	0.963
PF3D7_0930300	PF3D7_1228600	0.965
PF3D7_0318200	PF3D7_0520700	0.989
PF3D7_0403700	PF3D7_0610100	0.99
PF3D7_1003800	PF3D7_1110600	0.938
PF3D7_0722200	PF3D7_0828600	0.762
PF3D7_0423500	PF3D7_0525800	0.731
PF3D7_0510100	PF3D7_0904800	0.746
PF3D7_0307200	PF3D7_1206600	0.791
PF3D7_1004200	PF3D7_1355100	0.761
PF3D7_1019100	PF3D7_1325400	0.738
PF3D7_0717600	PF3D7_1202200	0.703
PF3D7_0207400	PF3D7_1331600	0.781
PF3D7_1105400	PF3D7_1358800	0.999
PF3D7_0908500	PF3D7_1037500	0.858
PF3D7_0810500	PF3D7_0926100	0.755
PF3D7_0424700	PF3D7_1370300	0.87
PF3D7_0214900	PF3D7_1348600	0.717
PF3D7_0318200	PF3D7_1108000	0.878
PF3D7_0307100	PF3D7_0309600	0.999
PF3D7_0516800	PF3D7_1317100	0.712
PF3D7_0612900	PF3D7_1445400	0.707
PF3D7_1353800	PF3D7_1353900	0.999
PF3D7_0312100	PF3D7_1128700	0.703
PF3D7_1138800	PF3D7_1211800	0.904
PF3D7_0919200	PF3D7_1017500	0.758
PF3D7_0102200	PF3D7_0318700	0.763
PF3D7_1461200	PF3D7_1465900	0.998
PF3D7_0217500	PF3D7_1007200	0.719
PF3D7_1007300	PF3D7_1468400	0.85
PF3D7_0707200	PF3D7_1346900	0.722
PF3D7_0707300	PF3D7_1321500.2	0.822
PF3D7_1206600	PF3D7_1317800	0.909
PF3D7_1031400.2	PF3D7_1138400	0.708
PF3D7_0214900	PF3D7_0321100	0.714
PF3D7_0712900	PF3D7_1253000	0.717
PF3D7_0312800	PF3D7_1421200	0.993
PF3D7_0917900	PF3D7_1136800	0.795
PF3D7_1346100	PF3D7_1418000	0.733
PF3D7_0312300	PF3D7_1311500	0.999
PF3D7_1242600	PF3D7_1463400	0.728
PF3D7_0419400	PF3D7_1220300	0.766
PF3D7_0825500	PF3D7_1230900	0.881
PF3D7_0206000	PF3D7_1304100	0.796
PF3D7_1248900	PF3D7_1402300	0.999
PF3D7_0204100	PF3D7_0607600	0.73
PF3D7_0303000	PF3D7_1211800	0.777
PF3D7_1143100	PF3D7_1243400	0.722
PF3D7_1242800	PF3D7_1310600	0.835
PF3D7_1433600	PF3D7_1460700	0.9
PF3D7_0202900	PF3D7_1027900	0.762
PF3D7_0110400	PF3D7_1419100	0.92
PF3D7_0621100	PF3D7_1323700	0.87
PF3D7_0501800	PF3D7_1013600	0.769
PF3D7_0410800	PF3D7_0704500	0.715
PF3D7_0932200	PF3D7_1232700	0.701
PF3D7_0613900	PF3D7_1252100	0.898
PF3D7_0508300	PF3D7_1218400	0.713
PF3D7_0102500	PF3D7_1229800	0.963
PF3D7_0501600	PF3D7_0717500	0.884
PF3D7_0806200	PF3D7_1025400	0.885
PF3D7_0214600	PF3D7_0525800	0.917
PF3D7_1332600	PF3D7_1433500	0.771
PF3D7_0923000	PF3D7_1030000	0.994
PF3D7_0519100	PF3D7_0813900	0.948
PF3D7_0817700	PF3D7_1430200	0.792
PF3D7_0503800	PF3D7_1026800	0.999
PF3D7_1008800	PF3D7_1106300	0.823
PF3D7_0409600	PF3D7_1017000	0.706
PF3D7_0605000	PF3D7_1365900	0.998
PF3D7_1368100	PF3D7_1414000	0.995
PF3D7_0517000	PF3D7_0614500	0.999
PF3D7_1037500	PF3D7_1308000	0.741
PF3D7_0527000	PF3D7_1211800	0.845
PF3D7_0310400	PF3D7_0416500	0.732
PF3D7_0403900	PF3D7_1417300	0.718
PF3D7_1037500	PF3D7_1436600	0.895
PF3D7_0407700	PF3D7_1417400	0.794
PF3D7_0317000	PF3D7_1119000	0.784
PF3D7_0511200	PF3D7_1364100	0.88
PF3D7_0317600	PF3D7_1426000	0.995
PF3D7_1424400	PF3D7_1447000	0.999
PF3D7_0306900	PF3D7_1109900	0.999
PF3D7_0218100	PF3D7_0806400	0.773
PF3D7_0527200	PF3D7_1470900	0.974
PF3D7_1227500	PF3D7_1406600	0.71
PF3D7_0323400	PF3D7_0911100	0.976
PF3D7_0203700	PF3D7_0418700	0.739
PF3D7_1235700	PF3D7_1330600	0.872
PF3D7_1201500	PF3D7_1206600	0.812
PF3D7_0915000	PF3D7_1439400	0.827
PF3D7_0616600	PF3D7_0715600	0.709
PF3D7_0933600	PF3D7_1242200	0.739
PF3D7_1137500	PF3D7_1364100	0.801
PF3D7_0705400	PF3D7_1355100	0.999
PF3D7_1302800	PF3D7_1424100	0.999
PF3D7_0818400	PF3D7_1357700	0.821
PF3D7_1107300	PF3D7_1308900	0.79
PF3D7_1229800	PF3D7_1455300	0.943
PF3D7_0921800	PF3D7_1352200	0.834
PF3D7_0918300	PF3D7_1408600	0.976
PF3D7_1035900	PF3D7_1307500	0.772
PF3D7_0508800	PF3D7_1411400	0.793
PF3D7_0715900	PF3D7_1437200	0.898
PF3D7_0620400	PF3D7_0817700	0.75
PF3D7_0630300	PF3D7_0709100	0.869
PF3D7_0615500	PF3D7_1306200	0.806
PF3D7_0729300	PF3D7_1404500	0.881
PF3D7_0630400	PF3D7_1012200	0.772
PF3D7_1037500	PF3D7_1236900	0.779
PF3D7_1351400	PF3D7_1406000	0.925
PF3D7_0417200	PF3D7_1222400	0.833
PF3D7_0528400	PF3D7_0929400	0.897
PF3D7_0916000	PF3D7_1025900	0.873
PF3D7_1116700	PF3D7_1417500	0.724
PF3D7_1313500	PF3D7_1348600	0.718
PF3D7_1415800	PF3D7_1428300	0.816
PF3D7_0423500	PF3D7_1140400	0.894
PF3D7_1026800	PF3D7_1323400	0.996
PF3D7_0422400	PF3D7_1406000	0.919
PF3D7_0822000	PF3D7_1323100	0.998
PF3D7_1221300	PF3D7_1321100	0.711
PF3D7_0217100	PF3D7_0920800	0.802
PF3D7_0318700	PF3D7_0323400	0.967
PF3D7_1035700	PF3D7_1307900	0.868
PF3D7_0911000	PF3D7_0935300	0.816
PF3D7_0614700	PF3D7_1104900	0.822
PF3D7_0520500	PF3D7_1333200	0.828
PF3D7_0317600	PF3D7_1331800	0.999
PF3D7_0100300	PF3D7_0415600	0.745
PF3D7_0309600	PF3D7_0422400	0.989
PF3D7_1219900	PF3D7_1308200	0.709
PF3D7_1355100	PF3D7_1405600	0.72
PF3D7_0812220	PF3D7_1450100	0.787
PF3D7_0528100	PF3D7_1218300	0.847
PF3D7_0411900	PF3D7_0613800	0.752
PF3D7_0919200	PF3D7_1229800	0.826
PF3D7_0710900	PF3D7_1124900	0.967
PF3D7_0603700	PF3D7_1350100	0.882
PF3D7_0516200	PF3D7_0716800	0.94
PF3D7_0817800	PF3D7_1236800	0.701
PF3D7_0320900	PF3D7_1329100	0.889
PF3D7_0411400	PF3D7_0827000	0.783
PF3D7_0402300	PF3D7_1149200	0.851
PF3D7_1317100	PF3D7_1328200	0.748
PF3D7_1007300	PF3D7_1469200	0.742
PF3D7_0827000	PF3D7_0921800	0.953
PF3D7_0106400	PF3D7_1301400	0.719
PF3D7_1005500	PF3D7_1424400	0.915
PF3D7_0811600	PF3D7_1472600	0.787
PF3D7_0416300	PF3D7_1337100	0.929
PF3D7_0802600	PF3D7_1221300	0.746
PF3D7_0415500	PF3D7_0517000	0.911
PF3D7_0705400	PF3D7_1304100	0.811
PF3D7_1017500	PF3D7_1222700	0.765
PF3D7_1301600	PF3D7_1335300	0.994
PF3D7_0802600	PF3D7_1471400	0.702
PF3D7_0220800	PF3D7_1035300	0.802
PF3D7_0318700	PF3D7_0507300	0.789
PF3D7_0209800	PF3D7_1438900	0.752
PF3D7_0210600	PF3D7_1204900	0.945
PF3D7_0516200	PF3D7_0904400	0.9
PF3D7_0808200	PF3D7_1125800	0.976
PF3D7_1341300	PF3D7_1460300	0.999
PF3D7_1133300	PF3D7_1410800	0.737
PF3D7_1227500	PF3D7_1409300	0.712
PF3D7_0618000	PF3D7_1007300	0.87
PF3D7_0102500	PF3D7_1007300	0.795
PF3D7_0935600	PF3D7_0936600	0.913
PF3D7_1004000	PF3D7_1461200	0.97
PF3D7_0620400	PF3D7_1341500	0.744
PF3D7_0407800	PF3D7_0828700	0.708
PF3D7_0904700	PF3D7_1433500	0.773
PF3D7_0416300	PF3D7_1361900	0.999
PF3D7_0806200	PF3D7_0932100	0.803
PF3D7_1203000	PF3D7_1361900	0.981
PF3D7_0913200	PF3D7_1130100	0.899
PF3D7_0527900	PF3D7_0920900	0.738
PF3D7_1321500.2	PF3D7_1431800	0.9
PF3D7_0827900	PF3D7_1344200	0.847
PF3D7_1110700	PF3D7_1451100	0.728
PF3D7_1028700	PF3D7_1251200	0.96
PF3D7_1117100	PF3D7_1235600	0.773
PF3D7_0704100	PF3D7_1123200	0.712
PF3D7_0717600	PF3D7_0803200	0.718
PF3D7_0920700	PF3D7_1009700	0.784
PF3D7_0105800	PF3D7_1223100	0.719
PF3D7_1003400	PF3D7_1452000	0.745
PF3D7_0811900	PF3D7_1417800	0.757
PF3D7_1216500	PF3D7_1467600	0.721
PF3D7_1341300	PF3D7_1431700	0.999
PF3D7_0520300	PF3D7_0829300	0.865
PF3D7_1235600	PF3D7_1308200	0.887
PF3D7_0708400	PF3D7_1232100	0.961
PF3D7_1035100	PF3D7_1137200	0.732
PF3D7_0323400	PF3D7_1026600	0.901
PF3D7_0710600	PF3D7_1103100	0.998
PF3D7_0308200	PF3D7_0720400	0.749
PF3D7_0419700	PF3D7_0620400	0.882
PF3D7_0308700	PF3D7_1104900	0.847
PF3D7_0505500	PF3D7_1415000	0.801
PF3D7_1226600	PF3D7_1429900	0.921
PF3D7_1035300	PF3D7_1209500.2	0.797
PF3D7_0825500	PF3D7_1445200	0.929
PF3D7_0820200	PF3D7_1409900	0.977
PF3D7_0515700	PF3D7_1143200	0.829
PF3D7_1242700	PF3D7_1433600	0.9
PF3D7_1308200	PF3D7_1366500	0.777
PF3D7_0613900	PF3D7_0725400	0.846
PF3D7_1243000	PF3D7_1324700	0.935
PF3D7_0705300	PF3D7_1322500	0.742
PF3D7_0307100	PF3D7_1341300	0.999
PF3D7_1015300	PF3D7_1434600	0.921
PF3D7_0611700	PF3D7_1351400	0.999
PF3D7_1132200	PF3D7_1408100	0.907
PF3D7_0420300	PF3D7_1125700	0.766
PF3D7_1014100	PF3D7_1035700	0.801
PF3D7_0613900	PF3D7_1209500.2	0.709
PF3D7_1106300	PF3D7_1111000	0.741
PF3D7_0621100	PF3D7_1322500	0.732
PF3D7_0936300	PF3D7_1301700	0.733
PF3D7_0312100	PF3D7_0411800	0.716
PF3D7_1012200	PF3D7_1246200	0.862
PF3D7_0516200	PF3D7_1357100	0.941
PF3D7_0707300	PF3D7_0802100	0.866
PF3D7_0216800	PF3D7_1449100	0.744
PF3D7_1413400	PF3D7_1472700	0.885
PF3D7_0306900	PF3D7_1426100	0.891
PF3D7_0703900	PF3D7_1022600	0.735
PF3D7_0916000	PF3D7_1321100	0.772
PF3D7_0517900	PF3D7_1436600	0.733
PF3D7_0310700	PF3D7_0418500	0.994
PF3D7_0904700	PF3D7_1023400	0.774
PF3D7_1009700	PF3D7_1129300	0.907
PF3D7_0418600	PF3D7_0717500	0.749
PF3D7_0628100	PF3D7_1251200	0.836
PF3D7_1211700	PF3D7_1435300	0.856
PF3D7_1226800	PF3D7_1451800	0.741
PF3D7_0418500	PF3D7_1353600	0.834
PF3D7_0301600	PF3D7_0727200	0.778
PF3D7_0303400	PF3D7_0831600	0.779
PF3D7_0528300	PF3D7_1461400	0.72
PF3D7_1144900	PF3D7_1332000	0.867
PF3D7_1206000	PF3D7_1463900	0.891
PF3D7_0529300	PF3D7_1144700	0.949
PF3D7_0904800	PF3D7_1017000	0.848
PF3D7_1206600	PF3D7_1366500	0.945
PF3D7_1035500	PF3D7_1143100	0.907
PF3D7_1004000	PF3D7_1015900	0.787
PF3D7_1001200	PF3D7_1209900	0.763
PF3D7_0704800	PF3D7_1472600	0.705
PF3D7_0206200	PF3D7_0515700	0.72
PF3D7_1117100	PF3D7_1437200	0.756
PF3D7_0828800	PF3D7_1335100	0.773
PF3D7_1456000	PF3D7_1471400	0.761
PF3D7_0704300	PF3D7_1325900	0.88
PF3D7_0403800	PF3D7_0424100	0.893
PF3D7_0303200	PF3D7_1031200	0.715
PF3D7_0417200	PF3D7_1107800	0.765
PF3D7_1229500	PF3D7_1349200	0.762
PF3D7_1119400	PF3D7_1211800	0.796
PF3D7_0607700	PF3D7_0929400	0.87
PF3D7_1249500	PF3D7_1330100	0.75
PF3D7_0730800.2	PF3D7_1247900	0.717
PF3D7_0815800	PF3D7_1207000	0.711
PF3D7_0304100	PF3D7_1461400	0.852
PF3D7_0614700	PF3D7_0902100	0.87
PF3D7_0609800	PF3D7_0813100	0.754
PF3D7_0920900	PF3D7_1143400	0.727
PF3D7_0301600	PF3D7_0920800	0.824
PF3D7_0826100	PF3D7_0926100	0.747
PF3D7_0821700	PF3D7_1428300	0.847
PF3D7_0207000	PF3D7_1035500	0.789
PF3D7_0316000	PF3D7_1251200	0.862
PF3D7_1463900	PF3D7_1472600	0.835
PF3D7_0205500	PF3D7_1431800	0.9
PF3D7_1235600	PF3D7_1415000	0.735
PF3D7_0530900	PF3D7_1345600	0.725
PF3D7_1117400	PF3D7_1332200	0.796
PF3D7_1410900	PF3D7_1445100	0.72
PF3D7_1031400.2	PF3D7_1468400	0.871
PF3D7_1027800	PF3D7_1426000	0.999
PF3D7_1208400	PF3D7_1442700	0.727
PF3D7_0307200	PF3D7_0422400	0.989
PF3D7_0111300	PF3D7_1318400	0.799
PF3D7_0913600	PF3D7_1448500	0.78
PF3D7_0516800	PF3D7_1138400	0.71
PF3D7_0604100	PF3D7_0805700	0.87
PF3D7_0220800	PF3D7_0501500	0.876
PF3D7_1227000	PF3D7_1315300	0.751
PF3D7_0729400	PF3D7_0923000	0.711
PF3D7_0304100	PF3D7_1318700	0.812
PF3D7_0507100	PF3D7_1323100	0.999
PF3D7_0103800	PF3D7_1431500	0.72
PF3D7_1137500	PF3D7_1430900	0.762
PF3D7_0805400	PF3D7_1244100	0.898
PF3D7_1003500	PF3D7_1426100	0.828
PF3D7_0611700	PF3D7_1004000	0.999
PF3D7_0712300	PF3D7_1240600	0.774
PF3D7_0905900	PF3D7_1020900	0.981
PF3D7_0507200	PF3D7_1035300	0.726
PF3D7_0217100	PF3D7_0933600	0.934
PF3D7_1324200	PF3D7_1461600	0.96
PF3D7_0408500	PF3D7_1433500	0.727
PF3D7_1235200	PF3D7_1439500	0.752
PF3D7_0318200	PF3D7_0319300	0.742
PF3D7_0727200	PF3D7_1134000	0.884
PF3D7_0516900	PF3D7_0818900	0.783
PF3D7_1129200	PF3D7_1474800	0.999
PF3D7_0530300	PF3D7_1138000	0.782
PF3D7_0810300	PF3D7_0902100	0.831
PF3D7_1314600	PF3D7_1344600	0.995
PF3D7_1353200	PF3D7_1401400	0.889
PF3D7_1237600	PF3D7_1357700	0.927
PF3D7_0818200	PF3D7_1219100	0.736
PF3D7_0212900	PF3D7_0802800	0.71
PF3D7_1107500	PF3D7_1313900	0.79
PF3D7_0412000	PF3D7_1004200	0.738
PF3D7_1352200	PF3D7_1357700	0.999
PF3D7_1125700	PF3D7_1423300	0.901
PF3D7_1107100	PF3D7_1134300	0.752
PF3D7_1212500	PF3D7_1323000	0.74
PF3D7_1012600	PF3D7_1308200	0.99
PF3D7_1224300	PF3D7_1365900	0.938
PF3D7_0911100	PF3D7_1344300	0.809
PF3D7_1218600	PF3D7_1442300	0.826
PF3D7_1015800	PF3D7_1231600	0.927
PF3D7_0207000	PF3D7_1335100	0.816
PF3D7_1113300	PF3D7_1331600	0.784
PF3D7_0214900	PF3D7_1318000	0.709
PF3D7_0501600	PF3D7_1252100	0.918
PF3D7_1223900	PF3D7_1348300	0.928
PF3D7_0207500	PF3D7_1001600	0.881
PF3D7_0528300	PF3D7_1009700	0.797
PF3D7_1003500	PF3D7_1366600	0.933
PF3D7_1030100	PF3D7_1461600	0.709
PF3D7_0630300	PF3D7_1037100	0.902
PF3D7_1035700	PF3D7_1431400	0.723
PF3D7_0831600	PF3D7_1019100	0.84
PF3D7_0817600	PF3D7_1012200	0.899
PF3D7_0927300	PF3D7_1019600	0.802
PF3D7_0528400	PF3D7_1036000	0.797
PF3D7_0111500	PF3D7_0406100	0.709
PF3D7_0217500	PF3D7_0628100	0.88
PF3D7_1116100	PF3D7_1129300	0.834
PF3D7_0719700	PF3D7_1216300	0.909
PF3D7_1015300	PF3D7_1451100	0.725
PF3D7_1237700	PF3D7_1306200	0.72
PF3D7_0622800	PF3D7_1218600	0.877
PF3D7_0628100	PF3D7_1351700	0.87
PF3D7_0903300	PF3D7_1437200	0.742
PF3D7_0515700	PF3D7_1221300	0.718
PF3D7_0404900	PF3D7_1471400	0.768
PF3D7_1028300	PF3D7_1448000	0.806
PF3D7_1035700	PF3D7_1313600	0.725
PF3D7_0305600	PF3D7_0504900	0.746
PF3D7_1206000	PF3D7_1452000	0.844
PF3D7_0932100	PF3D7_1359800	0.724
PF3D7_0607000	PF3D7_1109900	0.922
PF3D7_0610800	PF3D7_1211800	0.721
PF3D7_1406600	PF3D7_1434300	0.942
PF3D7_0203200	PF3D7_0418600	0.796
PF3D7_0731500	PF3D7_1149200	0.888
PF3D7_0318200	PF3D7_1357000	0.82
PF3D7_0622200	PF3D7_1317900	0.709
PF3D7_0604100	PF3D7_1221300	0.865
PF3D7_0528300	PF3D7_1126700	0.847
PF3D7_1352500	PF3D7_1412700	0.701
PF3D7_0814000	PF3D7_1434300	0.858
PF3D7_0818100	PF3D7_0828800	0.944
PF3D7_0214600	PF3D7_0615500	0.755
PF3D7_0207800	PF3D7_1012200	0.729
PF3D7_0416800	PF3D7_0512600	0.717
PF3D7_1318800	PF3D7_1473200	0.738
PF3D7_1206200	PF3D7_1342000	0.96
PF3D7_1143400	PF3D7_1451100	0.703
PF3D7_0817700	PF3D7_0907500	0.708
PF3D7_1232500	PF3D7_1247500	0.774
PF3D7_1031400.2	PF3D7_1145200	0.875
PF3D7_0824300	PF3D7_1245400	0.719
PF3D7_1234200	PF3D7_1308900	0.964
PF3D7_0204100	PF3D7_1410400	0.891
PF3D7_0618500	PF3D7_1342100	0.857
PF3D7_0417200	PF3D7_1416800	0.72
PF3D7_0109800	PF3D7_0913900	0.761
PF3D7_1012600	PF3D7_1146000	0.714
PF3D7_0407700	PF3D7_1321500.2	0.846
PF3D7_0805200	PF3D7_1243700	0.77
PF3D7_0422400	PF3D7_1312900	0.92
PF3D7_1025900	PF3D7_1145200	0.925
PF3D7_1031400.2	PF3D7_1436600	0.758
PF3D7_1134000	PF3D7_1238100	0.77
PF3D7_0806300	PF3D7_1107100	0.748
PF3D7_0717600	PF3D7_1228600	0.765
PF3D7_1322200	PF3D7_1325900	0.723
PF3D7_1312900	PF3D7_1365900	0.916
PF3D7_0628100	PF3D7_1136200	0.87
PF3D7_1026600	PF3D7_1035900	0.889
PF3D7_0402300	PF3D7_1036500	0.83
PF3D7_0719500	PF3D7_1416200	0.73
PF3D7_0527100	PF3D7_0704600	0.772
PF3D7_0204100	PF3D7_0707200	0.716
PF3D7_0708800	PF3D7_1447000	0.76
PF3D7_0506900	PF3D7_0924500	0.761
PF3D7_0527000	PF3D7_0904800	0.721
PF3D7_0811900	PF3D7_1448500	0.78
PF3D7_0727400	PF3D7_1224300	0.9
PF3D7_0522400	PF3D7_1252100	0.801
PF3D7_0100300	PF3D7_0421300	0.897
PF3D7_1251300	PF3D7_1405600	0.952
PF3D7_0818100	PF3D7_1022700	0.763
PF3D7_1223100	PF3D7_1246400	0.758
PF3D7_0519900	PF3D7_0521100	0.73
PF3D7_0414700	PF3D7_1241800	0.959
PF3D7_0422400	PF3D7_0822000	0.715
PF3D7_0501800	PF3D7_1427900	0.748
PF3D7_0507100	PF3D7_1421200	0.992
PF3D7_0317600	PF3D7_1004000	0.999
PF3D7_0409200	PF3D7_1448000	0.989
PF3D7_0729300	PF3D7_1129400	0.993
PF3D7_0613800	PF3D7_1306000	0.839
PF3D7_0802100	PF3D7_1019500.2	0.73
PF3D7_0322900	PF3D7_1243600	0.745
PF3D7_0613400	PF3D7_1144000	0.937
PF3D7_1118200	PF3D7_1247400	0.901
PF3D7_0419700	PF3D7_1035900	0.895
PF3D7_0509400	PF3D7_0602400	0.809
PF3D7_1031400.2	PF3D7_1232700	0.702
PF3D7_0106000	PF3D7_0305600	0.711
PF3D7_1111100	PF3D7_1251300	0.715
PF3D7_0516200	PF3D7_1007900	0.957
PF3D7_0805700	PF3D7_1440000	0.744
PF3D7_0320300	PF3D7_1447000	0.902
PF3D7_0729300	PF3D7_1225500	0.719
PF3D7_1116100	PF3D7_1435600	0.867
PF3D7_0813900	PF3D7_1426000	0.999
PF3D7_1227500	PF3D7_1328000	0.729
PF3D7_0705100	PF3D7_1409300	0.722
PF3D7_0308700	PF3D7_0808200	0.806
PF3D7_1019400	PF3D7_1110600	0.871
PF3D7_0511000	PF3D7_1341300	0.75
PF3D7_0612200	PF3D7_1364100	0.87
PF3D7_0422700	PF3D7_1460700	0.931
PF3D7_0213100	PF3D7_0818900	0.957
PF3D7_0515000	PF3D7_1224300	0.836
PF3D7_0914100	PF3D7_1472600	0.74
PF3D7_1123800	PF3D7_1470800	0.713
PF3D7_0812220	PF3D7_1436800	0.855
PF3D7_1109400	PF3D7_1225500	0.986
PF3D7_0206200	PF3D7_0618000	0.87
PF3D7_1364800	PF3D7_1366500	0.911
PF3D7_0728000	PF3D7_1445100	0.993
PF3D7_0919400	PF3D7_1422500	0.79
PF3D7_1145400	PF3D7_1422800	0.796
PF3D7_1211700	PF3D7_1303800	0.771
PF3D7_0516900	PF3D7_1431000	0.961
PF3D7_0315400	PF3D7_1427900	0.777
PF3D7_0423500	PF3D7_1243700	0.841
PF3D7_0100300	PF3D7_1150400	0.895
PF3D7_0905400	PF3D7_1238000	0.718
PF3D7_0419600	PF3D7_1221700	0.87
PF3D7_1315300	PF3D7_1449100	0.754
PF3D7_0407800	PF3D7_1029900	0.899
PF3D7_0628100	PF3D7_0822900	0.874
PF3D7_1129200	PF3D7_1365900	0.945
PF3D7_0910400	PF3D7_0915000	0.706
PF3D7_0811900	PF3D7_1026800	0.73
PF3D7_0806200	PF3D7_1035700	0.704
PF3D7_0405400	PF3D7_1229500	0.784
PF3D7_0424100	PF3D7_1468400	0.92
PF3D7_1327500	PF3D7_1471400	0.738
PF3D7_0935000	PF3D7_1030100	0.963
PF3D7_0620400	PF3D7_1117400	0.707
PF3D7_0707200	PF3D7_1364100	0.844
PF3D7_0726900	PF3D7_1009600	0.799
PF3D7_0214200	PF3D7_1431000	0.965
PF3D7_0932100	PF3D7_1463900	0.755
PF3D7_0925500	PF3D7_1419800.2	0.93
PF3D7_0831600	PF3D7_1107100	0.727
PF3D7_0110900	PF3D7_1109400	0.756
PF3D7_1307600	PF3D7_1431000	0.946
PF3D7_0817600	PF3D7_1313600	0.886
PF3D7_1327500	PF3D7_1409400	0.73
PF3D7_0804800	PF3D7_0821600	0.722
PF3D7_0927300	PF3D7_1342100	0.947
PF3D7_0710600	PF3D7_1365900	0.999
PF3D7_0508900	PF3D7_1031400.2	0.705
PF3D7_0516500	PF3D7_1104800	0.702
PF3D7_0220800	PF3D7_0515700	0.832
PF3D7_1311900	PF3D7_1419800.2	0.745
PF3D7_0503800	PF3D7_1413400	0.78
PF3D7_1013800	PF3D7_1335100	0.792
PF3D7_1211800	PF3D7_1343000	0.792
PF3D7_0214600	PF3D7_0503600	0.93
PF3D7_1204900	PF3D7_1238900	0.814
PF3D7_1025400	PF3D7_1436600	0.899
PF3D7_0618000	PF3D7_1345600	0.816
PF3D7_1008400	PF3D7_1353900	0.996
PF3D7_1346100	PF3D7_1429800	0.8
PF3D7_0308900	PF3D7_0619900	0.993
PF3D7_0408000	PF3D7_0911100	0.785
PF3D7_1126700	PF3D7_1342600	0.913
PF3D7_0519200	PF3D7_1456800	0.918
PF3D7_1203900	PF3D7_1211800	0.925
PF3D7_0711000	PF3D7_1113400	0.736
PF3D7_0509600	PF3D7_1104000	0.804
PF3D7_0321400	PF3D7_1252100	0.868
PF3D7_1312900	PF3D7_1474800	0.9
PF3D7_0217500	PF3D7_0316000	0.759
PF3D7_1224300	PF3D7_1460300	0.907
PF3D7_0501100.2	PF3D7_0507200	0.717
PF3D7_1335100	PF3D7_1472600	0.894
PF3D7_0509400	PF3D7_1363400	0.791
PF3D7_1323100	PF3D7_1431700	0.999
PF3D7_0716800	PF3D7_1243600	0.997
PF3D7_0415900	PF3D7_1406000	0.937
PF3D7_0419200	PF3D7_1321800	0.922
PF3D7_0214200	PF3D7_0821700	0.757
PF3D7_0612900	PF3D7_0703900	0.729
PF3D7_0622200	PF3D7_1469300	0.736
PF3D7_0310400	PF3D7_1358000	0.775
PF3D7_1129300	PF3D7_1229800	0.809
PF3D7_0607000	PF3D7_1103100	0.915
PF3D7_0704100	PF3D7_0813100	0.89
PF3D7_0821700	PF3D7_1302800	0.965
PF3D7_0308300	PF3D7_0507500	0.895
PF3D7_0419400	PF3D7_1133300	0.794
PF3D7_0929400	PF3D7_1001600	0.724
PF3D7_0418600	PF3D7_0722200	0.757
PF3D7_0717900	PF3D7_1149400	0.723
PF3D7_0934000	PF3D7_1416800	0.904
PF3D7_0424300	PF3D7_0911100	0.862
PF3D7_0802800	PF3D7_0817600	0.918
PF3D7_0219200	PF3D7_0312800	0.975
PF3D7_0803500	PF3D7_1251200	0.75
PF3D7_0402100	PF3D7_1115800	0.844
PF3D7_0731600	PF3D7_1238800	0.916
PF3D7_1025600	PF3D7_1439000	0.85
PF3D7_1014100	PF3D7_1335400	0.899
PF3D7_1327400	PF3D7_1421900	0.727
PF3D7_0905400	PF3D7_1009700	0.901
PF3D7_0921200	PF3D7_1324000	0.771
PF3D7_0407200	PF3D7_1113400	0.72
PF3D7_1220300	PF3D7_1325400	0.756
PF3D7_1126100	PF3D7_1435300	0.826
PF3D7_0607000	PF3D7_1004000	0.943
PF3D7_0502000	PF3D7_0935200	0.989
PF3D7_1210900	PF3D7_1214100	0.822
PF3D7_0704300	PF3D7_0805700	0.87
PF3D7_1009700	PF3D7_1455300	0.835
PF3D7_0831600	PF3D7_1028700	0.868
PF3D7_1138400	PF3D7_1426700	0.748
PF3D7_0413900	PF3D7_1365900	0.708
PF3D7_1121900	PF3D7_1227000	0.749
PF3D7_0817700	PF3D7_1315300	0.739
PF3D7_1015600	PF3D7_1330600	0.762
PF3D7_0722200	PF3D7_1321500.2	0.755
PF3D7_1003100	PF3D7_1334900	0.705
PF3D7_1365900	PF3D7_1461300	0.999
PF3D7_0807100	PF3D7_1308900	0.718
PF3D7_1025900	PF3D7_1453200	0.781
PF3D7_0309600	PF3D7_0611700	0.999
PF3D7_0419700	PF3D7_0628100	0.826
PF3D7_1130200	PF3D7_1426200	0.812
PF3D7_0630300	PF3D7_1456000	0.745
PF3D7_0805700	PF3D7_1452000	0.724
PF3D7_0418200	PF3D7_1342000	0.781
PF3D7_0802600	PF3D7_1345600	0.854
PF3D7_0916000	PF3D7_1243700	0.819
PF3D7_0708800	PF3D7_1039100	0.748
PF3D7_0515700	PF3D7_1409300	0.769
PF3D7_1341500	PF3D7_1468400	0.868
PF3D7_1104900	PF3D7_1460600	0.745
PF3D7_0515400	PF3D7_1461400	0.875
PF3D7_0218500	PF3D7_0323500	0.718
PF3D7_1344300	PF3D7_1345600	0.87
PF3D7_0624000	PF3D7_0922500	0.814
PF3D7_0919900	PF3D7_1141800	0.744
PF3D7_0817700	PF3D7_0913800	0.728
PF3D7_1211700	PF3D7_1412100	0.773
PF3D7_1004000	PF3D7_1246800	0.9
PF3D7_0516900	PF3D7_1142500	0.934
PF3D7_0614500	PF3D7_1210000	0.826
PF3D7_0612200	PF3D7_1417300	0.751
PF3D7_1324900	PF3D7_1433500	0.842
PF3D7_0920800	PF3D7_1033100	0.817
PF3D7_1133200	PF3D7_1319400	0.777
PF3D7_0106000	PF3D7_1307900	0.751
PF3D7_0105400.2	PF3D7_1133400	0.745
PF3D7_0602400	PF3D7_1130200	0.889
PF3D7_0825500	PF3D7_1330800	0.809
PF3D7_1343100	PF3D7_1343200	0.723
PF3D7_0319400	PF3D7_0927700	0.708
PF3D7_1121300	PF3D7_1249300	0.752
PF3D7_0311300	PF3D7_1437200	0.754
PF3D7_1123900	PF3D7_1247900	0.771
PF3D7_1347300	PF3D7_1441800	0.824
PF3D7_0818100	PF3D7_1417400	0.742
PF3D7_0321400	PF3D7_0810300	0.87
PF3D7_0403600	PF3D7_1437200	0.732
PF3D7_1026800	PF3D7_1302800	0.999
PF3D7_0528300	PF3D7_1145200	0.826
PF3D7_0524800	PF3D7_1412700	0.97
PF3D7_0625300	PF3D7_1013600	0.742
PF3D7_0920700	PF3D7_1435300	0.701
PF3D7_1307500	PF3D7_1435600	0.777
PF3D7_0413600	PF3D7_1312900	0.917
PF3D7_0505800	PF3D7_1368800	0.771
PF3D7_0922600	PF3D7_1367500	0.846
PF3D7_0508800	PF3D7_1361900	0.928
PF3D7_0630400	PF3D7_0704500	0.766
PF3D7_1221900	PF3D7_1407900	0.744
PF3D7_0102200	PF3D7_1038400	0.719
PF3D7_0923000	PF3D7_1234800	0.928
PF3D7_0812600	PF3D7_1220300	0.931
PF3D7_1235200	PF3D7_1238000	0.761
PF3D7_0919400	PF3D7_1134100	0.993
PF3D7_0310700	PF3D7_0512600	0.784
PF3D7_0727200	PF3D7_1139700	0.763
PF3D7_0423300	PF3D7_1209500.2	0.76
PF3D7_0721600	PF3D7_1242700	0.999
PF3D7_0502800	PF3D7_1433500	0.721
PF3D7_1107100	PF3D7_1323700	0.736
PF3D7_0416600	PF3D7_1251300	0.906
PF3D7_0317600	PF3D7_1123400	0.927
PF3D7_0513300	PF3D7_1439900	0.886
PF3D7_0307700	PF3D7_1317100	0.772
PF3D7_0719600	PF3D7_0919600	0.921
PF3D7_0919600	PF3D7_1001200	0.723
PF3D7_0509400	PF3D7_1331100	0.902
PF3D7_1138400	PF3D7_1228600	0.824
PF3D7_0514100	PF3D7_1347100	0.799
PF3D7_0305600	PF3D7_0411900	0.884
PF3D7_0812400	PF3D7_1107700	0.705
PF3D7_0826700	PF3D7_1414300	0.999
PF3D7_0707900	PF3D7_0716100	0.988
PF3D7_0210700	PF3D7_1461400	0.734
PF3D7_1307300	PF3D7_1431800	0.913
PF3D7_0817600	PF3D7_0831600	0.846
PF3D7_0405000	PF3D7_1404500	0.743
PF3D7_1145200	PF3D7_1344300	0.87
PF3D7_0106800	PF3D7_1242800	0.989
PF3D7_0507700	PF3D7_1032500	0.903
PF3D7_1027800	PF3D7_1109900	0.999
PF3D7_0507200	PF3D7_0817700	0.878
PF3D7_0919900	PF3D7_1325900	0.779
PF3D7_0507200	PF3D7_1310200	0.713
PF3D7_1012300	PF3D7_1462700	0.854
PF3D7_1029600	PF3D7_1329400	0.715
PF3D7_0508000	PF3D7_1463900	0.719
PF3D7_0212900	PF3D7_1322600	0.775
PF3D7_0727200	PF3D7_0802300	0.745
PF3D7_1222300	PF3D7_1413900	0.754
PF3D7_0414900	PF3D7_0629300	0.803
PF3D7_1436600	PF3D7_1472600	0.932
PF3D7_0705700	PF3D7_1124900	0.999
PF3D7_0405200	PF3D7_0803200	0.817
PF3D7_0918300	PF3D7_1144500	0.703
PF3D7_0321400	PF3D7_0618000	0.826
PF3D7_0532300	PF3D7_1302000	0.748
PF3D7_1012700	PF3D7_1014400	0.78
PF3D7_0822300	PF3D7_0909800	0.999
PF3D7_0320900	PF3D7_0823300	0.936
PF3D7_1008900	PF3D7_1323100	0.722
PF3D7_1246800	PF3D7_1358800	0.904
PF3D7_0914300	PF3D7_1119100	0.747
PF3D7_1207000	PF3D7_1228300	0.766
PF3D7_0913500	PF3D7_0931800	0.73
PF3D7_0220800	PF3D7_1361800	0.891
PF3D7_0723300	PF3D7_1323700	0.788
PF3D7_0725000	PF3D7_1368800	0.774
PF3D7_0323400	PF3D7_0808200	0.961
PF3D7_0322900	PF3D7_1451100	0.995
PF3D7_0507200	PF3D7_1114900	0.709
PF3D7_0622800	PF3D7_1033100	0.733
PF3D7_0423500	PF3D7_0506900	0.781
PF3D7_0822300	PF3D7_1231500	0.96
PF3D7_0528100	PF3D7_1245800	0.703
PF3D7_1035900	PF3D7_1351700	0.858
PF3D7_0920800	PF3D7_1225100	0.827
PF3D7_0613400	PF3D7_1408600	0.889
PF3D7_0713800	PF3D7_0722200	0.725
PF3D7_1016000	PF3D7_1307500	0.877
PF3D7_0108300	PF3D7_1140700	0.727
PF3D7_0814000	PF3D7_1224300	0.945
PF3D7_0615500	PF3D7_0933800	0.853
PF3D7_0518600	PF3D7_1014300	0.974
PF3D7_0730800.2	PF3D7_1401100	0.904
PF3D7_1319300	PF3D7_1344900	0.745
PF3D7_1207600	PF3D7_1434100	0.756
PF3D7_0802300	PF3D7_1206200	0.708
PF3D7_1138000	PF3D7_1437300	0.773
PF3D7_1134300	PF3D7_1303700	0.826
PF3D7_1348300	PF3D7_1424400	0.706
PF3D7_0505200	PF3D7_1145400	0.796
PF3D7_1037100	PF3D7_1435300	0.846
PF3D7_1347100	PF3D7_1429900	0.982
PF3D7_1308300	PF3D7_1468700	0.958
PF3D7_0419300	PF3D7_0917100	0.772
PF3D7_0613800	PF3D7_1029900	0.87
PF3D7_0311200	PF3D7_1213800	0.751
PF3D7_0212600	PF3D7_1229800	0.738
PF3D7_1126100	PF3D7_1333200	0.812
PF3D7_0820000	PF3D7_1213700	0.92
PF3D7_0508900	PF3D7_1007200	0.707
PF3D7_0922200	PF3D7_1211800	0.869
PF3D7_1218000	PF3D7_1301600	0.928
PF3D7_1213800	PF3D7_1416800	0.951
PF3D7_0528200	PF3D7_1408600	0.959
PF3D7_1332700	PF3D7_1357700	0.927
PF3D7_0311300	PF3D7_1440100	0.736
PF3D7_1330800	PF3D7_1417500	0.869
PF3D7_0513800	PF3D7_1332300	0.714
PF3D7_0405200	PF3D7_0722200	0.788
PF3D7_0212600	PF3D7_0423800	0.718
PF3D7_1036500	PF3D7_1413700	0.755
PF3D7_1310800	PF3D7_1407500	0.718
PF3D7_0625300	PF3D7_1306200	0.732
PF3D7_0628100	PF3D7_1019100	0.832
PF3D7_1361700	PF3D7_1364100	0.877
PF3D7_0617000	PF3D7_1215300	0.712
PF3D7_0522300	PF3D7_0523000	0.727
PF3D7_0501100.2	PF3D7_1102700	0.77
PF3D7_0716200	PF3D7_0936300	0.744
PF3D7_1132200	PF3D7_1317800	0.756
PF3D7_0300100	PF3D7_0400100	0.714
PF3D7_0512700	PF3D7_1308200	0.985
PF3D7_0214600	PF3D7_0424300	0.742
PF3D7_0108000	PF3D7_0608500	0.999
PF3D7_0419700	PF3D7_1136200	0.916
PF3D7_0315100	PF3D7_0413600	0.947
PF3D7_1234800	PF3D7_1414800	0.996
PF3D7_0206000	PF3D7_1226600	0.971
PF3D7_0108000	PF3D7_1008400	0.997
PF3D7_1127100	PF3D7_1433500	0.852
PF3D7_0415900	PF3D7_1434300	0.738
PF3D7_0308300	PF3D7_1222700	0.735
PF3D7_0506100	PF3D7_1217200	0.738
PF3D7_0932000	PF3D7_1461400	0.863
PF3D7_0305700	PF3D7_0316800	0.704
PF3D7_0525300	PF3D7_0914100	0.882
PF3D7_0103800	PF3D7_1211800	0.705
PF3D7_0323400	PF3D7_1014100	0.971
PF3D7_0207800	PF3D7_0802600	0.731
PF3D7_1351700	PF3D7_1452000	0.888
PF3D7_0727200	PF3D7_1415800	0.759
PF3D7_0524400	PF3D7_1211800	0.72
PF3D7_0216700.2	PF3D7_1308400	0.728
PF3D7_0207500	PF3D7_1227000	0.763
PF3D7_0419600	PF3D7_1242700	0.834
PF3D7_1035700	PF3D7_1222700	0.77
PF3D7_0704300	PF3D7_1355100	0.73
PF3D7_1212000	PF3D7_1338300	0.741
PF3D7_1123400	PF3D7_1460300	0.907
PF3D7_0713800	PF3D7_1128900	0.749
PF3D7_0303500	PF3D7_1306200	0.731
PF3D7_0312800	PF3D7_1206600	0.845
PF3D7_1241800	PF3D7_1431800	0.9
PF3D7_1143300	PF3D7_1439100	0.925
PF3D7_0614000	PF3D7_1365400	0.702
PF3D7_0620400	PF3D7_1468400	0.87
PF3D7_0214700	PF3D7_0424100	0.901
PF3D7_1017500	PF3D7_1240100	0.828
PF3D7_0308900	PF3D7_0503300	0.922
PF3D7_0403900	PF3D7_1003100	0.832
PF3D7_0217500	PF3D7_1025900	0.839
PF3D7_0821000	PF3D7_1470800	0.722
PF3D7_0618000	PF3D7_1348600	0.83
PF3D7_0511200	PF3D7_1331600	0.826
PF3D7_1309100	PF3D7_1433600	0.9
PF3D7_1003600	PF3D7_1435600	0.783
PF3D7_0218500	PF3D7_0924700	0.918
PF3D7_1144900	PF3D7_1145400	0.77
PF3D7_0619400	PF3D7_1466300	0.753
PF3D7_0506100	PF3D7_1445900	0.72
PF3D7_0206200	PF3D7_0911100	0.933
PF3D7_0310400	PF3D7_0932200	0.73
PF3D7_0107200	PF3D7_1417200	0.716
PF3D7_0916700	PF3D7_1148900	0.717
PF3D7_0929400	PF3D7_0935800	0.982
PF3D7_0204500	PF3D7_1324900	0.973
PF3D7_0717500	PF3D7_1007300	0.788
PF3D7_0919900	PF3D7_1306000	0.877
PF3D7_1028200	PF3D7_1346900	0.772
PF3D7_0316700	PF3D7_1340800	0.793
PF3D7_0203200	PF3D7_0206200	0.751
PF3D7_0413500	PF3D7_1451700	0.713
PF3D7_0605000	PF3D7_1105400	0.868
PF3D7_0318200	PF3D7_1231600	0.936
PF3D7_1143400	PF3D7_1351400	0.81
PF3D7_0817600	PF3D7_0828700	0.731
PF3D7_0802300	PF3D7_1213900	0.732
PF3D7_0305600	PF3D7_1446600	0.762
PF3D7_0827900	PF3D7_1215000	0.775
PF3D7_0305600	PF3D7_1415000	0.952
PF3D7_0517300	PF3D7_1003800	0.94
PF3D7_0503300	PF3D7_1022400	0.945
PF3D7_1241800	PF3D7_1404500	0.821
PF3D7_0629700	PF3D7_0804500	0.738
PF3D7_1234800	PF3D7_1452700	0.922
PF3D7_0302200	PF3D7_0802600	0.9
PF3D7_1141600	PF3D7_1325100	0.704
PF3D7_0312800	PF3D7_1027800	0.999
PF3D7_0909800	PF3D7_1004400	0.932
PF3D7_0620400	PF3D7_1204900	0.84
PF3D7_0725300	PF3D7_1129400	0.758
PF3D7_1213800	PF3D7_1222300	0.805
PF3D7_1109900	PF3D7_1413400	0.828
PF3D7_0504400	PF3D7_0626800	0.913
PF3D7_0320300	PF3D7_0813900	0.719
PF3D7_0721600	PF3D7_1004000	0.998
PF3D7_0501500	PF3D7_0515700	0.894
PF3D7_1229800	PF3D7_1436600	0.896
PF3D7_0705300	PF3D7_1355100	0.996
PF3D7_0320300	PF3D7_0816600	0.706
PF3D7_0704800	PF3D7_1437300	0.745
PF3D7_0817700	PF3D7_1313600	0.835
PF3D7_0525800	PF3D7_1361800	0.882
PF3D7_0324900	PF3D7_0712000	0.763
PF3D7_0203700	PF3D7_1340300	0.745
PF3D7_0207800	PF3D7_1114900	0.707
PF3D7_0504400	PF3D7_0715900	0.742
PF3D7_0613900	PF3D7_0817600	0.815
PF3D7_0306800	PF3D7_0516900	0.835
PF3D7_1005500	PF3D7_1308900	0.967
PF3D7_0405900	PF3D7_1430200	0.84
PF3D7_0614700	PF3D7_0813100	0.841
PF3D7_0207500	PF3D7_0902800	0.766
PF3D7_0826700	PF3D7_1451100	0.995
PF3D7_0214900	PF3D7_0321400	0.742
PF3D7_0414900	PF3D7_1136200	0.781
PF3D7_1031800	PF3D7_1323700	0.726
PF3D7_0908500	PF3D7_1035300	0.892
PF3D7_0920800	PF3D7_1324000	0.746
PF3D7_0304100	PF3D7_1243700	0.895
PF3D7_0309500	PF3D7_1211800	0.771
PF3D7_1136200	PF3D7_1222700	0.723
PF3D7_1129400	PF3D7_1132200	0.869
PF3D7_0320900	PF3D7_0417200	0.795
PF3D7_0613900	PF3D7_1335300	0.87
PF3D7_1009700	PF3D7_1133400	0.762
PF3D7_1003800	PF3D7_1126200	0.96
PF3D7_0528400	PF3D7_1009700	0.91
PF3D7_0501600	PF3D7_1321100	0.8
PF3D7_1417800	PF3D7_1427500	0.742
PF3D7_0304100	PF3D7_0817700	0.847
PF3D7_0613300	PF3D7_0914100	0.829
PF3D7_1204600	PF3D7_1311700	0.767
PF3D7_0614500	PF3D7_1004000	0.999
PF3D7_0302200	PF3D7_1463900	0.818
PF3D7_0207700	PF3D7_0704500	0.894
PF3D7_1125500	PF3D7_1306900	0.8
PF3D7_0501300	PF3D7_1038800	0.718
PF3D7_0213900	PF3D7_1412600	0.788
PF3D7_0108500	PF3D7_0202500	0.953
PF3D7_0614500	PF3D7_0719600	0.999
PF3D7_0630400	PF3D7_1129300	0.734
PF3D7_0822900	PF3D7_1335300	0.842
PF3D7_1348600	PF3D7_1412000	0.851
PF3D7_0507400	PF3D7_1238900	0.821
PF3D7_0626800	PF3D7_1124500	0.977
PF3D7_0312800	PF3D7_1245400	0.976
PF3D7_0628100	PF3D7_1313600	0.87
PF3D7_1246800	PF3D7_1338200	0.9
PF3D7_1315800	PF3D7_1428800.2	0.773
PF3D7_1318800	PF3D7_1450100	0.92
PF3D7_1035700	PF3D7_1228600	0.83
PF3D7_0711000	PF3D7_1134100	0.737
PF3D7_1035300	PF3D7_1423100	0.791
PF3D7_0625400	PF3D7_1221900	0.795
PF3D7_0719600	PF3D7_1447000	0.999
PF3D7_0721300	PF3D7_1471000	0.773
PF3D7_1037100	PF3D7_1437200	0.926
PF3D7_1332200	PF3D7_1459900	0.882
PF3D7_0519200	PF3D7_1235700	0.988
PF3D7_0630500	PF3D7_0814300	0.899
PF3D7_0913600	PF3D7_1345400	0.749
PF3D7_0219600	PF3D7_0904900	0.724
PF3D7_0104100	PF3D7_0806200	0.73
PF3D7_0520500	PF3D7_1012600	0.8
PF3D7_0628100	PF3D7_1012200	0.87
PF3D7_0905100	PF3D7_1211800	0.749
PF3D7_0822900	PF3D7_1026600	0.91
PF3D7_0612700	PF3D7_1335100	0.888
PF3D7_1134100	PF3D7_1433500	0.817
PF3D7_0207600	PF3D7_0707300	0.83
PF3D7_0822900	PF3D7_1327300	0.751
PF3D7_0623900	PF3D7_0706700	0.789
PF3D7_0501500	PF3D7_0611600	0.801
PF3D7_0802800	PF3D7_1119500	0.915
PF3D7_0527200	PF3D7_0807500	0.975
PF3D7_0312400	PF3D7_1037100	0.727
PF3D7_1241700	PF3D7_1347100	0.74
PF3D7_0905400	PF3D7_1136700.2	0.744
PF3D7_0516200	PF3D7_0519100	0.996
PF3D7_0111600	PF3D7_0111700	0.727
PF3D7_0108500	PF3D7_1401400	0.91
PF3D7_0729300	PF3D7_0814300	0.889
PF3D7_1123900	PF3D7_1213700	0.987
PF3D7_0507100	PF3D7_1348300	0.956
PF3D7_0511000	PF3D7_1358800	0.911
PF3D7_0506100	PF3D7_1302600	0.742
PF3D7_0914400	PF3D7_1017100	0.725
PF3D7_0812220	PF3D7_1415800	0.728
PF3D7_0423500	PF3D7_1126700	0.763
PF3D7_1036000	PF3D7_1133400	0.959
PF3D7_1009700	PF3D7_1138000	0.842
PF3D7_0704500	PF3D7_0817700	0.768
PF3D7_0309600	PF3D7_1441200	0.998
PF3D7_0302500	PF3D7_0611600	0.713
PF3D7_0103800	PF3D7_0403900	0.708
PF3D7_0629800	PF3D7_1245300	0.853
PF3D7_0204100	PF3D7_1323700	0.87
PF3D7_0705700	PF3D7_1406000	0.937
PF3D7_0721600	PF3D7_1350100	0.703
PF3D7_0915100	PF3D7_1237000	0.999
PF3D7_0508000	PF3D7_0805700	0.847
PF3D7_0212900	PF3D7_0321100	0.759
PF3D7_0509400	PF3D7_0827000	0.814
PF3D7_0212300	PF3D7_1211800	0.836
PF3D7_0214600	PF3D7_1431500	0.825
PF3D7_1019400	PF3D7_1027800	0.999
PF3D7_0503600	PF3D7_1036000	0.901
PF3D7_1251200	PF3D7_1461400	0.902
PF3D7_0515700	PF3D7_1238600	0.896
PF3D7_0817000	PF3D7_0915100	0.764
PF3D7_0402300	PF3D7_0818100	0.944
PF3D7_1211800	PF3D7_1414000	0.816
PF3D7_0105400.2	PF3D7_1460600	0.729
PF3D7_0319100	PF3D7_0812600	0.786
PF3D7_0509400	PF3D7_1130200	0.791
PF3D7_1009000	PF3D7_1413800	0.945
PF3D7_1308000	PF3D7_1409400	0.813
PF3D7_0919800	PF3D7_0924600	0.702
PF3D7_0516200	PF3D7_0903900	0.999
PF3D7_0220800	PF3D7_0607700	0.747
PF3D7_0403800	PF3D7_0423800	0.792
PF3D7_1206000	PF3D7_1359800	0.782
PF3D7_0716600	PF3D7_1103400	0.815
PF3D7_0923000	PF3D7_1138400	0.915
PF3D7_0710000	PF3D7_1433800	0.758
PF3D7_0207600	PF3D7_1128900	0.776
PF3D7_0615500	PF3D7_1138400	0.714
PF3D7_1012200	PF3D7_1452000	0.893
PF3D7_1352500	PF3D7_1435300	0.949
PF3D7_0920800	PF3D7_1113400	0.799
PF3D7_0516200	PF3D7_1366600	0.927
PF3D7_1211400	PF3D7_1433500	0.783
PF3D7_1124500	PF3D7_1342800	0.817
PF3D7_0802100	PF3D7_1327500	0.832
PF3D7_0811000	PF3D7_1333200	0.818
PF3D7_0320700	PF3D7_0504900	0.701
PF3D7_0710600	PF3D7_1450100	0.918
PF3D7_0613300	PF3D7_0717500	0.766
PF3D7_0918700	PF3D7_1337800	0.931
PF3D7_0623800	PF3D7_1149600	0.882
PF3D7_0503300	PF3D7_1304900	0.91
PF3D7_1344300	PF3D7_1348600	0.72
PF3D7_0719700	PF3D7_1461300	0.999
PF3D7_0723800	PF3D7_1320700	0.762
PF3D7_0614500	PF3D7_1124900	0.999
PF3D7_0306400	PF3D7_1117100	0.722
PF3D7_0305000	PF3D7_1323000	0.711
PF3D7_1207100	PF3D7_1417500	0.751
PF3D7_0810300	PF3D7_1116100	0.885
PF3D7_1033600	PF3D7_1220100	0.993
PF3D7_0305000	PF3D7_1027800	0.82
PF3D7_0629100	PF3D7_0913300	0.721
PF3D7_1204300	PF3D7_1431700	0.808
PF3D7_0907500	PF3D7_1430200	0.702
PF3D7_1015900	PF3D7_1132200	0.776
PF3D7_1015900	PF3D7_1342800	0.982
PF3D7_0207800	PF3D7_0423300	0.756
PF3D7_1149200	PF3D7_1433500	0.843
PF3D7_0617100	PF3D7_0905900	0.769
PF3D7_0806200	PF3D7_0811000	0.777
PF3D7_0715900	PF3D7_0925300	0.709
PF3D7_0705500	PF3D7_1251200	0.738
PF3D7_0320300	PF3D7_1222300	0.79
PF3D7_0725000	PF3D7_1361900	0.983
PF3D7_0423800	PF3D7_1016000	0.82
PF3D7_0312800	PF3D7_1132700	0.996
PF3D7_0822000	PF3D7_1323400	0.999
PF3D7_1143100	PF3D7_1455300	0.954
PF3D7_1146600	PF3D7_1471400	0.802
PF3D7_1010200	PF3D7_1357700	0.766
PF3D7_0203400	PF3D7_0904700	0.88
PF3D7_1228600	PF3D7_1446600	0.742
PF3D7_0210600	PF3D7_0618000	0.87
PF3D7_0106700	PF3D7_0302000	0.8
PF3D7_1327400	PF3D7_1361700	0.74
PF3D7_0810800	PF3D7_1224000	0.985
PF3D7_0403900	PF3D7_0805700	0.87
PF3D7_0805700	PF3D7_1107100	0.762
PF3D7_0418100	PF3D7_0708700	0.936
PF3D7_0924500	PF3D7_1035100	0.769
PF3D7_0924600	PF3D7_1449100	0.79
PF3D7_0216800	PF3D7_0403900	0.761
PF3D7_1419800.2	PF3D7_1454700	0.85
PF3D7_1129200	PF3D7_1358700	0.762
PF3D7_0407800	PF3D7_1308000	0.894
PF3D7_0501000	PF3D7_0532400	0.745
PF3D7_0929400	PF3D7_1351700	0.739
PF3D7_0306900	PF3D7_1103100	0.998
PF3D7_0217500	PF3D7_1010300	0.735
PF3D7_0410300	PF3D7_1431500	0.812
PF3D7_0409600	PF3D7_1417800	0.839
PF3D7_0215700	PF3D7_0520600	0.94
PF3D7_0727400	PF3D7_1353800	0.999
PF3D7_0424100	PF3D7_1031400.2	0.704
PF3D7_1105400	PF3D7_1109900	0.998
PF3D7_0220800	PF3D7_0508100	0.716
PF3D7_1035300	PF3D7_1323700	0.811
PF3D7_0109100	PF3D7_1209500.2	0.722
PF3D7_0423800	PF3D7_0919300	0.835
PF3D7_0513100	PF3D7_1422500	0.756
PF3D7_0803200	PF3D7_1321500.2	0.871
PF3D7_0208200	PF3D7_0520000	0.767
PF3D7_0605000	PF3D7_0813900	0.903
PF3D7_0520000	PF3D7_0528200	0.943
PF3D7_0215700	PF3D7_1211300	0.908
PF3D7_0607700	PF3D7_0831600	0.743
PF3D7_0934800	PF3D7_1232500	0.881
PF3D7_1348600	PF3D7_1435600	0.792
PF3D7_0508100	PF3D7_0717600	0.813
PF3D7_0214900	PF3D7_1323700	0.931
PF3D7_0716800	PF3D7_1240400	0.855
PF3D7_0505400	PF3D7_1328000	0.733
PF3D7_0927600	PF3D7_1448500	0.768
PF3D7_1359800	PF3D7_1435600	0.79
PF3D7_1031200	PF3D7_1145200	0.914
PF3D7_1122800	PF3D7_1451700	0.744
PF3D7_0307100	PF3D7_0706400	0.989
PF3D7_1317800	PF3D7_1460700	0.999
PF3D7_1310200	PF3D7_1335100	0.787
PF3D7_1026600	PF3D7_1252400	0.899
PF3D7_0525100	PF3D7_1200700	0.924
PF3D7_1236900	PF3D7_1410400	0.871
PF3D7_0722600	PF3D7_1124800	0.792
PF3D7_1235700	PF3D7_1433500	0.797
PF3D7_0914500	PF3D7_1328200	0.738
PF3D7_0708100	PF3D7_1110200	0.918
PF3D7_0422400	PF3D7_1004000	0.999
PF3D7_1017900	PF3D7_1328100	0.999
PF3D7_1441800	PF3D7_1457500	0.994
PF3D7_1408600	PF3D7_1410600	0.956
PF3D7_0614700	PF3D7_1323700	0.717
PF3D7_0632800	PF3D7_1240900	0.742
PF3D7_0405200	PF3D7_1128900	0.719
PF3D7_0216800	PF3D7_1412000	0.713
PF3D7_0522300	PF3D7_1015800	0.845
PF3D7_1126100	PF3D7_1225800	0.831
PF3D7_0314900	PF3D7_1019600	0.846
PF3D7_0405400	PF3D7_1110200	0.999
PF3D7_0623800	PF3D7_1138500	0.755
PF3D7_0704500	PF3D7_0803200	0.904
PF3D7_1116100	PF3D7_1455300	0.768
PF3D7_0911800	PF3D7_1143400	0.707
PF3D7_0217800	PF3D7_0611700	0.99
PF3D7_0716200	PF3D7_0727200	0.706
PF3D7_0507400	PF3D7_1423300	0.869
PF3D7_0501100.2	PF3D7_0902300	0.75
PF3D7_1015000	PF3D7_1034400	0.831
PF3D7_1323700	PF3D7_1356100	0.76
PF3D7_0319400	PF3D7_1355100	0.735
PF3D7_1138000	PF3D7_1321100	0.869
PF3D7_0508900	PF3D7_0612700	0.803
PF3D7_1007300	PF3D7_1318000	0.79
PF3D7_1116800	PF3D7_1434300	0.953
PF3D7_1012600	PF3D7_1358800	0.836
PF3D7_0528400	PF3D7_0707300	0.893
PF3D7_1359400	PF3D7_1410600	0.715
PF3D7_1141600	PF3D7_1420900	0.959
PF3D7_0403900	PF3D7_1238000	0.728
PF3D7_0802000	PF3D7_1436000	0.923
PF3D7_0503100	PF3D7_1141600	0.793
PF3D7_1123900	PF3D7_1414300	0.888
PF3D7_0508500	PF3D7_0515700	0.702
PF3D7_0419800	PF3D7_1105400	0.796
PF3D7_1321100	PF3D7_1410400	0.766
PF3D7_1132200	PF3D7_1461900	0.753
PF3D7_0621100	PF3D7_1003100	0.87
PF3D7_0813100	PF3D7_1435600	0.925
PF3D7_1313000	PF3D7_1460400	0.967
PF3D7_0503300	PF3D7_0518500	0.906
PF3D7_1331700	PF3D7_1349200	0.967
PF3D7_0306300	PF3D7_1215000	0.786
PF3D7_1315300	PF3D7_1327500	0.787
PF3D7_0704300	PF3D7_1422500	0.714
PF3D7_1246800	PF3D7_1323400	0.9
PF3D7_0505500	PF3D7_1328000	0.776
PF3D7_0922500	PF3D7_1234200	0.776
PF3D7_0201900	PF3D7_0730900	0.786
PF3D7_1012600	PF3D7_1415800	0.947
PF3D7_0803200	PF3D7_1137200	0.729
PF3D7_0310500	PF3D7_1227100	0.795
PF3D7_0826500	PF3D7_1229500	0.729
PF3D7_1134200	PF3D7_1225500	0.79
PF3D7_0505500	PF3D7_1433500	0.827
PF3D7_0108600	PF3D7_1136800	0.749
PF3D7_0817700	PF3D7_1036000	0.828
PF3D7_0811900	PF3D7_1434200	0.72
PF3D7_0516200	PF3D7_1341200	0.999
PF3D7_0218000	PF3D7_1211700	0.885
PF3D7_0509400	PF3D7_1406200	0.757
PF3D7_1404800	PF3D7_1436300	0.934
PF3D7_0220800	PF3D7_1344300	0.738
PF3D7_0905400	PF3D7_1133400	0.862
PF3D7_0528400	PF3D7_1022700	0.95
PF3D7_0716100	PF3D7_1340300	0.853
PF3D7_0531100	PF3D7_0905400	0.735
PF3D7_0302500	PF3D7_0929400	0.968
PF3D7_1321100	PF3D7_1361800	0.814
PF3D7_1026800	PF3D7_1408100	0.939
PF3D7_1019600	PF3D7_1122700	0.743
PF3D7_0402300	PF3D7_1439500	0.728
PF3D7_1019900	PF3D7_1323700	0.754
PF3D7_0932000	PF3D7_1007300	0.747
PF3D7_1019400	PF3D7_1224300	0.91
PF3D7_0408700	PF3D7_0829600	0.729
PF3D7_0802800	PF3D7_0929400	0.812
PF3D7_0829300	PF3D7_1443300	0.999
PF3D7_0317200	PF3D7_0905400	0.739
PF3D7_0805700	PF3D7_1117100	0.74
PF3D7_0109000	PF3D7_0919200	0.827
PF3D7_0308900	PF3D7_0405400	0.994
PF3D7_1307500	PF3D7_1461400	0.771
PF3D7_1252100	PF3D7_1437300	0.924
PF3D7_0822300	PF3D7_1443300	0.95
PF3D7_1030100	PF3D7_1031500	0.833
PF3D7_1019600	PF3D7_1227000	0.8
PF3D7_0917900	PF3D7_1308200	0.812
PF3D7_0312800	PF3D7_0721600	0.998
PF3D7_0109800	PF3D7_1474100	0.705
PF3D7_1037100	PF3D7_1232200	0.821
PF3D7_1313000	PF3D7_1418000	0.702
PF3D7_1242700	PF3D7_1341300	0.999
PF3D7_0916700	PF3D7_1368100	0.9
PF3D7_1211300	PF3D7_1359200	0.908
PF3D7_0416400	PF3D7_1117100	0.766
PF3D7_1245400	PF3D7_1460300	0.749
PF3D7_1027400	PF3D7_1037100	0.908
PF3D7_0307100	PF3D7_1123400	0.925
PF3D7_0919600	PF3D7_1424400	0.907
PF3D7_0415500	PF3D7_0503300	0.922
PF3D7_0210700	PF3D7_0217300	0.821
PF3D7_1004500	PF3D7_1223100	0.722
PF3D7_0619900	PF3D7_1307200	0.915
PF3D7_0316000	PF3D7_0515400	0.755
PF3D7_0304100	PF3D7_1016000	0.771
PF3D7_0814300	PF3D7_1008800	0.763
PF3D7_1332200	PF3D7_1423300	0.897
PF3D7_1109400	PF3D7_1226700	0.979
PF3D7_1032100	PF3D7_1209200	0.736
PF3D7_0511200	PF3D7_0607700	0.714
PF3D7_0204100	PF3D7_0508100	0.892
PF3D7_1015600	PF3D7_1116800	0.912
PF3D7_0516900	PF3D7_1134000	0.744
PF3D7_0714000	PF3D7_1328800	0.755
PF3D7_1231600	PF3D7_1431800	0.907
PF3D7_1136900	PF3D7_1252400	0.954
PF3D7_0407800	PF3D7_0501600	0.924
PF3D7_0105300	PF3D7_0828700	0.728
PF3D7_0604100	PF3D7_0704800	0.72
PF3D7_0316800	PF3D7_0517000	0.999
PF3D7_1430900	PF3D7_1431600	0.749
PF3D7_1035100	PF3D7_1209500.2	0.767
PF3D7_0407700	PF3D7_1009700	0.871
PF3D7_0305000	PF3D7_1003800	0.788
PF3D7_0307200	PF3D7_1428300	0.944
PF3D7_1126200	PF3D7_1212700	0.941
PF3D7_1118200	PF3D7_1125400	0.731
PF3D7_0414900	PF3D7_1345600	0.711
PF3D7_0306800	PF3D7_0516400	0.941
[truncated: 54,250 more rows]

## Sheet: LS_network
Gene1	Gene2	Score
PF3D7_0818800	PF3D7_1415800	0.863
PF3D7_0725000	PF3D7_1203000	0.739
PF3D7_0507400	PF3D7_1243700	0.921
PF3D7_0203200	PF3D7_0620400	0.864
PF3D7_0605800	PF3D7_0803400	0.845
PF3D7_0216400	PF3D7_1332000	0.868
PF3D7_0418600	PF3D7_1310200	0.725
PF3D7_0919400	PF3D7_1322500	0.775
PF3D7_0935400	PF3D7_0935800	0.701
PF3D7_1439400	PF3D7_1462700	0.999
PF3D7_0215300	PF3D7_0301300	0.751
PF3D7_0630400	PF3D7_1235200	0.724
PF3D7_0507500	PF3D7_1009700	0.721
PF3D7_0415500	PF3D7_1231600	0.963
PF3D7_0405200	PF3D7_0508500	0.707
PF3D7_0905400	PF3D7_1143100	0.756
PF3D7_0415600	PF3D7_1329400	0.915
PF3D7_1309100	PF3D7_1341300	0.999
PF3D7_1003500	PF3D7_1130200	0.999
PF3D7_0710600	PF3D7_1105400	0.993
PF3D7_0105300	PF3D7_0607600	0.744
PF3D7_0404000	PF3D7_1117400	0.727
PF3D7_0817700	PF3D7_1209500.2	0.779
PF3D7_0321100	PF3D7_1322600	0.804
PF3D7_1423300	PF3D7_1472600	0.884
PF3D7_0419400	PF3D7_0604100	0.87
PF3D7_1104900	PF3D7_1342600	0.871
PF3D7_1132700	PF3D7_1331800	0.999
PF3D7_1338100	PF3D7_1466300	0.999
PF3D7_0404700	PF3D7_0501600	0.91
PF3D7_0707900	PF3D7_1109900	0.882
PF3D7_0812400	PF3D7_1412300	0.982
PF3D7_0705700	PF3D7_1331300	0.902
PF3D7_1309500	PF3D7_1417500	0.996
PF3D7_1110600	PF3D7_1309100	0.805
PF3D7_0618000	PF3D7_0717500	0.87
PF3D7_0408000	PF3D7_1204900	0.76
PF3D7_0311300	PF3D7_0419400	0.718
PF3D7_0306800	PF3D7_0927700	0.859
PF3D7_1014100	PF3D7_1136900	0.96
PF3D7_0419900	PF3D7_0823000	0.724
PF3D7_0516200	PF3D7_1246800	0.9
PF3D7_1338300	PF3D7_1465900	0.991
PF3D7_0828600	PF3D7_1358400	0.878
PF3D7_0214900	PF3D7_1146600	0.783
PF3D7_1223900	PF3D7_1424400	0.767
PF3D7_0920800	PF3D7_1332900	0.885
PF3D7_1130700	PF3D7_1318400	0.744
PF3D7_1009700	PF3D7_1351700	0.878
PF3D7_1026800	PF3D7_1431000	0.875
PF3D7_1036000	PF3D7_1435600	0.77
PF3D7_1302800	PF3D7_1312900	0.917
PF3D7_1105400	PF3D7_1407100	0.846
PF3D7_0802800	PF3D7_1229800	0.848
PF3D7_0405900	PF3D7_1145200	0.941
PF3D7_1002800	PF3D7_1344200	0.81
PF3D7_1003600	PF3D7_1118700	0.714
PF3D7_0613300	PF3D7_1206300	0.858
PF3D7_0217500	PF3D7_1013800	0.91
PF3D7_0713800	PF3D7_0717500	0.732
PF3D7_0710600	PF3D7_1465900	0.999
PF3D7_0414900	PF3D7_1026600	0.899
PF3D7_0303200	PF3D7_1123200	0.768
PF3D7_0611600	PF3D7_1440100	0.866
PF3D7_0109000	PF3D7_1252400	0.91
PF3D7_0415500	PF3D7_1234800	0.99
PF3D7_0424600	PF3D7_0501100.2	0.756
PF3D7_0214900	PF3D7_0308300	0.816
PF3D7_0628100	PF3D7_1003400	0.759
PF3D7_1320700	PF3D7_1423300	0.702
PF3D7_0803800	PF3D7_1474800	0.999
PF3D7_1036000	PF3D7_1140400	0.845
PF3D7_0414900	PF3D7_0802600	0.8
PF3D7_0305600	PF3D7_0416500	0.781
PF3D7_1129300	PF3D7_1321500.2	0.765
PF3D7_0102200	PF3D7_1344200	0.884
PF3D7_1410600	PF3D7_1445100	0.966
PF3D7_1212000	PF3D7_1462800	0.749
PF3D7_0821700	PF3D7_1332800	0.956
PF3D7_0808700	PF3D7_0926100	0.723
PF3D7_0919900	PF3D7_1458300	0.725
PF3D7_0303200	PF3D7_1223100	0.827
PF3D7_0302500	PF3D7_0414900	0.859
PF3D7_1133200	PF3D7_1306200	0.792
PF3D7_0602400	PF3D7_1447000	0.981
PF3D7_1003500	PF3D7_1005500	0.911
PF3D7_0920800	PF3D7_1129400	0.917
PF3D7_0106000	PF3D7_0806200	0.751
PF3D7_0822900	PF3D7_1356800	0.91
PF3D7_0216400	PF3D7_1034000	0.799
PF3D7_1125700	PF3D7_1413700	0.717
PF3D7_0522500	PF3D7_1307600	0.954
PF3D7_1003500	PF3D7_1441200	0.999
PF3D7_0715900	PF3D7_1427500	0.704
PF3D7_0307100	PF3D7_1433000	0.73
PF3D7_1031800	PF3D7_1238000	0.791
PF3D7_0423300	PF3D7_1246200	0.824
PF3D7_0318700	PF3D7_1218000	0.898
PF3D7_0719600	PF3D7_1109900	0.999
PF3D7_1356800	PF3D7_1468400	0.896
PF3D7_0419400	PF3D7_0730500	0.786
PF3D7_0309600	PF3D7_1331800	0.999
PF3D7_0308700	PF3D7_1136200	0.747
PF3D7_0613300	PF3D7_1222700	0.868
PF3D7_0918800	PF3D7_1344900	0.731
PF3D7_0704100	PF3D7_1227500	0.742
PF3D7_0423300	PF3D7_0508000	0.72
PF3D7_0307700	PF3D7_1448500	0.81
PF3D7_1134000	PF3D7_1222300	0.969
PF3D7_0730800.2	PF3D7_1134700	0.72
PF3D7_0528400	PF3D7_1439500	0.873
PF3D7_0519100	PF3D7_1142600	0.999
PF3D7_0218000	PF3D7_1463200	0.999
PF3D7_1330600	PF3D7_1351400	0.83
PF3D7_0219200	PF3D7_0309600	0.986
PF3D7_1037500	PF3D7_1436200	0.768
PF3D7_0506900	PF3D7_1471400	0.744
PF3D7_0713400	PF3D7_1215900	0.745
PF3D7_0312100	PF3D7_1458300	0.736
PF3D7_0918300	PF3D7_1106000	0.767
PF3D7_1017500	PF3D7_1149200	0.741
PF3D7_0615500	PF3D7_1110700	0.824
PF3D7_1104200	PF3D7_1437200	0.928
PF3D7_0307600	PF3D7_1437200	0.722
PF3D7_0828800	PF3D7_1316200	0.863
PF3D7_0715900	PF3D7_0908300.2	0.825
PF3D7_1218600	PF3D7_1444800	0.745
PF3D7_0705700	PF3D7_1007900	0.918
PF3D7_1229100	PF3D7_1434500	0.745
PF3D7_0725200	PF3D7_1338300	0.713
PF3D7_0102500	PF3D7_0930300	0.828
PF3D7_1027800	PF3D7_1132700	0.999
PF3D7_0705400	PF3D7_1111100	0.799
PF3D7_0507200	PF3D7_1436600	0.9
PF3D7_1117400	PF3D7_1310700	0.737
PF3D7_0730400	PF3D7_1136900	0.807
PF3D7_0512600	PF3D7_1348500	0.919
PF3D7_0817600	PF3D7_1136200	0.894
PF3D7_0924600	PF3D7_0926500	0.704
PF3D7_0905900	PF3D7_1218300	0.761
PF3D7_0705700	PF3D7_1224300	0.9
PF3D7_0505200	PF3D7_1314200	0.726
PF3D7_0929400	PF3D7_1132800	0.772
PF3D7_1016800	PF3D7_1337800	0.755
PF3D7_0628100	PF3D7_1037500	0.9
PF3D7_1337100	PF3D7_1355100	0.731
PF3D7_0508700	PF3D7_1402700	0.752
PF3D7_0306800	PF3D7_1443900	0.79
PF3D7_0217800	PF3D7_1126200	0.999
PF3D7_0403900	PF3D7_0932100	0.876
PF3D7_1109900	PF3D7_1223900	0.887
PF3D7_0308300	PF3D7_0507400	0.917
PF3D7_0802100	PF3D7_1435600	0.778
PF3D7_1003400	PF3D7_1143100	0.744
PF3D7_0811600	PF3D7_0905400	0.74
PF3D7_1143300	PF3D7_1229500	0.848
PF3D7_0508000	PF3D7_0628100	0.792
PF3D7_1015900	PF3D7_1412500	0.759
PF3D7_0403900	PF3D7_1322600	0.788
PF3D7_0520300	PF3D7_1234800	0.913
PF3D7_1031400.2	PF3D7_1435300	0.762
PF3D7_0614500	PF3D7_0707900	0.938
PF3D7_0806200	PF3D7_0919900	0.881
PF3D7_0318200	PF3D7_1429900	0.93
PF3D7_1223100	PF3D7_1345600	0.751
PF3D7_1126700	PF3D7_1455300	0.937
PF3D7_1237600	PF3D7_1241800	0.885
PF3D7_0503600	PF3D7_1469200	0.702
PF3D7_0212600	PF3D7_0507400	0.882
PF3D7_0618000	PF3D7_0810300	0.825
PF3D7_0220800	PF3D7_1003400	0.788
PF3D7_1026800	PF3D7_1027800	0.999
PF3D7_0818100	PF3D7_1310700	0.965
PF3D7_1349200	PF3D7_1416800	0.957
PF3D7_0207600	PF3D7_0508000	0.947
PF3D7_0307100	PF3D7_1007900	0.931
PF3D7_0613800	PF3D7_1439400	0.71
PF3D7_0501500	PF3D7_0515400	0.787
PF3D7_1303800	PF3D7_1359600	0.769
PF3D7_1223100	PF3D7_1251200	0.755
PF3D7_1026800	PF3D7_1324900	0.835
PF3D7_0302600	PF3D7_0516100	0.706
PF3D7_1407100	PF3D7_1413400	0.971
PF3D7_0604100	PF3D7_1322600	0.715
PF3D7_0407800	PF3D7_0613900	0.85
PF3D7_1211800	PF3D7_1331700	0.701
PF3D7_0610400	PF3D7_0904700	0.798
PF3D7_0524900	PF3D7_1111000	0.776
PF3D7_1209500.2	PF3D7_1420200	0.876
PF3D7_0811000	PF3D7_1001600	0.718
PF3D7_0818800	PF3D7_1146000	0.857
PF3D7_0628100	PF3D7_1252100	0.87
PF3D7_0410700	PF3D7_1138400	0.777
PF3D7_1124800	PF3D7_1146000	0.753
PF3D7_0110800	PF3D7_0517700	0.739
PF3D7_0403800	PF3D7_0817600	0.795
PF3D7_1007200	PF3D7_1323700	0.821
PF3D7_1027800	PF3D7_1309100	0.999
PF3D7_1111000	PF3D7_1308200	0.719
PF3D7_0410700	PF3D7_0620700	0.703
PF3D7_0509400	PF3D7_1126200	0.764
PF3D7_0321100	PF3D7_0919900	0.826
PF3D7_0404900	PF3D7_0722200	0.875
PF3D7_1001200	PF3D7_1359600	0.72
PF3D7_0220800	PF3D7_1345600	0.801
PF3D7_0405900	PF3D7_1013800	0.952
PF3D7_1130200	PF3D7_1341300	0.999
PF3D7_0828600	PF3D7_1123200	0.72
PF3D7_0306400	PF3D7_1456000	0.848
PF3D7_0410400	PF3D7_1106300	0.776
PF3D7_0510500	PF3D7_1347100	0.831
PF3D7_0729300	PF3D7_1012600	0.953
PF3D7_0610900	PF3D7_1105100	0.812
PF3D7_0211600	PF3D7_0806400	0.999
PF3D7_0410000	PF3D7_0731100	0.715
PF3D7_0220800	PF3D7_0930300	0.788
PF3D7_0811600	PF3D7_1335100	0.702
PF3D7_1333000	PF3D7_1406600	0.855
PF3D7_0913200	PF3D7_1447000	0.834
PF3D7_0722200	PF3D7_1222700	0.886
PF3D7_0407700	PF3D7_0905400	0.823
PF3D7_0105400.2	PF3D7_1035900	0.766
PF3D7_0315400	PF3D7_0721100	0.766
PF3D7_0931100	PF3D7_1424100	0.857
PF3D7_0618000	PF3D7_0817700	0.87
PF3D7_0424200	PF3D7_0918700	0.753
PF3D7_1308300	PF3D7_1424100	0.998
PF3D7_0214600	PF3D7_1028900	0.82
PF3D7_0620400	PF3D7_1129300	0.776
PF3D7_0927300	PF3D7_1235200	0.753
PF3D7_0104100	PF3D7_0216800	0.727
PF3D7_0813900	PF3D7_0814000	0.999
PF3D7_0308200	PF3D7_1134000	0.903
PF3D7_0711000	PF3D7_0711500	0.73
PF3D7_1356800	PF3D7_1417400	0.968
PF3D7_0503300	PF3D7_1125500	0.922
PF3D7_0817700	PF3D7_1125800	0.761
PF3D7_0911100	PF3D7_1026600	0.92
PF3D7_0407700	PF3D7_1472600	0.85
PF3D7_1035000	PF3D7_1417500	0.809
PF3D7_0216800	PF3D7_0722200	0.72
PF3D7_0307200	PF3D7_0612900	0.806
PF3D7_0730500	PF3D7_0929400	0.701
PF3D7_0105300	PF3D7_1110700	0.946
PF3D7_0814000	PF3D7_1366600	0.917
PF3D7_0508100	PF3D7_1308000	0.783
PF3D7_1353900	PF3D7_1470900	0.999
PF3D7_0318200	PF3D7_1323400	0.748
PF3D7_0212300	PF3D7_0705700	0.941
PF3D7_0207800	PF3D7_0806200	0.754
PF3D7_1015800	PF3D7_1417800	0.852
PF3D7_1318700	PF3D7_1455300	0.717
PF3D7_0416500	PF3D7_0607700	0.798
PF3D7_1247500	PF3D7_1343100	0.766
PF3D7_0932100	PF3D7_1209500.2	0.883
PF3D7_1342000	PF3D7_1408100	0.737
PF3D7_1035600	PF3D7_1436200	0.738
PF3D7_0415000	PF3D7_1332000	0.908
PF3D7_1007200	PF3D7_1107100	0.784
PF3D7_0404700	PF3D7_0423500	0.837
PF3D7_0722200	PF3D7_1461400	0.894
PF3D7_1209500.2	PF3D7_1435300	0.812
PF3D7_0407700	PF3D7_1315300	0.707
PF3D7_0216800	PF3D7_0419400	0.891
PF3D7_0407800	PF3D7_1307900	0.795
PF3D7_1012600	PF3D7_1207600	0.85
PF3D7_0810300	PF3D7_1439500	0.799
PF3D7_0827000	PF3D7_1133700	0.764
PF3D7_1007200	PF3D7_1409400	0.79
PF3D7_0903900	PF3D7_1004000	0.999
PF3D7_0312100	PF3D7_1214100	0.721
PF3D7_0720400	PF3D7_1324900	0.778
PF3D7_0105300	PF3D7_1439400	0.702
PF3D7_0307600	PF3D7_0903300	0.718
PF3D7_1125500	PF3D7_1420000	0.972
PF3D7_0501000	PF3D7_0830700	0.725
PF3D7_0507500	PF3D7_1016000	0.851
PF3D7_1232500	PF3D7_1471400	0.806
PF3D7_1037100	PF3D7_1342800	0.976
PF3D7_0920800	PF3D7_1333000	0.848
PF3D7_0929400	PF3D7_1344300	0.821
PF3D7_0307100	PF3D7_1366600	0.9
PF3D7_1035700	PF3D7_1461400	0.772
PF3D7_1414400	PF3D7_1469200	0.942
PF3D7_1017100	PF3D7_1310700	0.762
PF3D7_1009700	PF3D7_1436600	0.866
PF3D7_1238600	PF3D7_1361800	0.873
PF3D7_0719600	PF3D7_1351400	0.999
PF3D7_0903300	PF3D7_1315300	0.772
PF3D7_0416500	PF3D7_1206600	0.906
PF3D7_0220800	PF3D7_0507200	0.861
PF3D7_0704300	PF3D7_0704500	0.895
PF3D7_0424500	PF3D7_1114200	0.739
PF3D7_0920800	PF3D7_1107400	0.794
PF3D7_1010600	PF3D7_1026800	0.95
PF3D7_0517900	PF3D7_0530900	0.722
PF3D7_0321100	PF3D7_0813100	0.807
PF3D7_0709100	PF3D7_0902800	0.747
PF3D7_0532300	PF3D7_1330800	0.712
PF3D7_0602400	PF3D7_1137500	0.926
PF3D7_0805300	PF3D7_1125800	0.792
PF3D7_0524000	PF3D7_0813300	0.844
PF3D7_0408000	PF3D7_1125800	0.87
PF3D7_0809100	PF3D7_1240900	0.771
PF3D7_0612700	PF3D7_1437300	0.727
PF3D7_1229800	PF3D7_1344300	0.936
PF3D7_0914800	PF3D7_1315300	0.706
PF3D7_0424100	PF3D7_0822900	0.927
PF3D7_0812600	PF3D7_0934100	0.819
PF3D7_0206200	PF3D7_1035900	0.787
PF3D7_0210200	PF3D7_1305000	0.708
PF3D7_0405900	PF3D7_1410800	0.894
PF3D7_1366500	PF3D7_1431600	0.755
PF3D7_1145200	PF3D7_1252100	0.917
PF3D7_0604100	PF3D7_1143200	0.772
PF3D7_0311300	PF3D7_1304000	0.711
PF3D7_0919200	PF3D7_0920500	0.832
PF3D7_0209600	PF3D7_0707300	0.762
PF3D7_1216900	PF3D7_1437900	0.782
PF3D7_0308100	PF3D7_1029900	0.79
PF3D7_0613900	PF3D7_1009700	0.822
PF3D7_0730900	PF3D7_1340300	0.742
PF3D7_1030100	PF3D7_1132200	0.719
PF3D7_0725200	PF3D7_1109900	0.907
PF3D7_1016000	PF3D7_1455300	0.919
PF3D7_0419900	PF3D7_1414500	0.785
PF3D7_0508900	PF3D7_0528400	0.714
PF3D7_0905500	PF3D7_1029900	0.787
PF3D7_0214900	PF3D7_0916000	0.883
PF3D7_0919400	PF3D7_1308800	0.723
PF3D7_0713800	PF3D7_0934800	0.737
PF3D7_0318500	PF3D7_1229800	0.847
PF3D7_1238100	PF3D7_1453700	0.707
PF3D7_0414700	PF3D7_1107700	0.999
PF3D7_1368100	PF3D7_1402300	0.999
PF3D7_1004200	PF3D7_1322200	0.729
PF3D7_0605800	PF3D7_1241700	0.885
PF3D7_1364800	PF3D7_1418900	0.911
PF3D7_1222300	PF3D7_1344200	0.988
PF3D7_0519400	PF3D7_1308300	0.999
PF3D7_0322900	PF3D7_1312900	0.907
PF3D7_1019900	PF3D7_1472600	0.796
PF3D7_0402100	PF3D7_1404800	0.89
PF3D7_0302500	PF3D7_1472600	0.805
PF3D7_0613400	PF3D7_1308300	0.963
PF3D7_0706400	PF3D7_1447000	0.99
PF3D7_1012200	PF3D7_1236900	0.859
PF3D7_0826700	PF3D7_1460700	0.996
PF3D7_0504600	PF3D7_1108500	0.874
PF3D7_1143300	PF3D7_1323100	0.962
PF3D7_0613800	PF3D7_1004200	0.713
PF3D7_0905400	PF3D7_1307900	0.87
PF3D7_0530800	PF3D7_1229400	0.721
PF3D7_1136200	PF3D7_1238000	0.796
PF3D7_0210600	PF3D7_0620300	0.749
PF3D7_0102700	PF3D7_0108500	0.842
PF3D7_0604100	PF3D7_0704100	0.87
PF3D7_0710600	PF3D7_1341200	0.999
PF3D7_0516900	PF3D7_0716800	0.714
PF3D7_0214800	PF3D7_0623800	0.739
PF3D7_1012600	PF3D7_1413400	0.846
PF3D7_0822900	PF3D7_1310200	0.854
PF3D7_0613900	PF3D7_0704500	0.743
PF3D7_0613800	PF3D7_1317100	0.868
PF3D7_1014100	PF3D7_1126700	0.927
PF3D7_0316500	PF3D7_0505400	0.727
PF3D7_0922500	PF3D7_1436000	0.993
PF3D7_1025400	PF3D7_1436200	0.73
PF3D7_0419700	PF3D7_0508000	0.868
PF3D7_0322000	PF3D7_0926700	0.701
PF3D7_0531100	PF3D7_0611600	0.816
PF3D7_1420900	PF3D7_1451800	0.772
PF3D7_0802100	PF3D7_1031400.2	0.71
PF3D7_0404700	PF3D7_1029900	0.78
PF3D7_0611600	PF3D7_0927300	0.853
PF3D7_1365900	PF3D7_1447000	0.998
PF3D7_0827100	PF3D7_0828200	0.704
PF3D7_1346100	PF3D7_1367600	0.712
PF3D7_1105400	PF3D7_1223900	0.868
PF3D7_1128900	PF3D7_1346900	0.718
PF3D7_0611600	PF3D7_0802800	0.87
PF3D7_0902100	PF3D7_0934800	0.786
PF3D7_0613300	PF3D7_1452000	0.95
PF3D7_0505500	PF3D7_1417800	0.857
PF3D7_0105800	PF3D7_0715200	0.768
PF3D7_0105800	PF3D7_0310400	0.784
PF3D7_1227500	PF3D7_1317100	0.795
PF3D7_0710600	PF3D7_1342000	0.998
PF3D7_1004000	PF3D7_1407100	0.754
PF3D7_1015900	PF3D7_1246200	0.751
PF3D7_0219700	PF3D7_1352900	0.873
PF3D7_0312800	PF3D7_1366600	0.942
PF3D7_0818800	PF3D7_1028400	0.955
PF3D7_0503600	PF3D7_0914100	0.793
PF3D7_1034200	PF3D7_1367600	0.889
PF3D7_0321100	PF3D7_1031200	0.715
PF3D7_1117700	PF3D7_1472200	0.921
PF3D7_1014300	PF3D7_1021900	0.728
PF3D7_1129000	PF3D7_1129200	0.759
PF3D7_0102500	PF3D7_1222700	0.763
PF3D7_0920200	PF3D7_1317100	0.738
PF3D7_1126900	PF3D7_1234800	0.713
PF3D7_0424100	PF3D7_0911100	0.919
PF3D7_0419400	PF3D7_1145200	0.772
PF3D7_1226600	PF3D7_1433300	0.772
PF3D7_0903300	PF3D7_1035100	0.779
PF3D7_0407700	PF3D7_0704500	0.868
PF3D7_0531100	PF3D7_1322500	0.703
PF3D7_0104100	PF3D7_1128900	0.737
PF3D7_0207000	PF3D7_1035400	0.86
PF3D7_1118700	PF3D7_1344300	0.808
PF3D7_0623500	PF3D7_0927300	0.815
PF3D7_0212300	PF3D7_0322000	0.767
PF3D7_1407100	PF3D7_1428300	0.852
PF3D7_0423300	PF3D7_1228600	0.886
PF3D7_1206000	PF3D7_1332200	0.731
PF3D7_1234800	PF3D7_1461600	0.999
PF3D7_0526500	PF3D7_0819000	0.999
PF3D7_0731500	PF3D7_0828800	0.949
PF3D7_1011400	PF3D7_1224300	0.9
PF3D7_0212900	PF3D7_0802100	0.714
PF3D7_0602400	PF3D7_0705700	0.931
PF3D7_1002800	PF3D7_1406600	0.765
PF3D7_0731500	PF3D7_1243700	0.792
PF3D7_0404700	PF3D7_1133400	0.812
PF3D7_1132200	PF3D7_1350100	0.831
PF3D7_0321400	PF3D7_1452000	0.884
PF3D7_0922600	PF3D7_1416500	0.994
PF3D7_0519100	PF3D7_0814000	0.995
PF3D7_1113100	PF3D7_1248500	0.827
PF3D7_1323100	PF3D7_1417500	0.854
PF3D7_1031200	PF3D7_1437300	0.887
PF3D7_1213900	PF3D7_1229100	0.728
PF3D7_0902100	PF3D7_1243400	0.705
PF3D7_0611600	PF3D7_0919900	0.87
PF3D7_0501500	PF3D7_0722200	0.918
PF3D7_0405900	PF3D7_1361800	0.917
PF3D7_1318000	PF3D7_1459900	0.728
PF3D7_0803200	PF3D7_0916000	0.766
PF3D7_1032500	PF3D7_1448400	0.898
PF3D7_0629300	PF3D7_1351700	0.756
PF3D7_0810300	PF3D7_1236900	0.826
PF3D7_0415500	PF3D7_0517300	0.944
PF3D7_0501000	PF3D7_1103100	0.769
PF3D7_0306800	PF3D7_1010600	0.748
PF3D7_0802600	PF3D7_1228600	0.887
PF3D7_1246400	PF3D7_1307500	0.839
PF3D7_0618500	PF3D7_1015900	0.73
PF3D7_0905500	PF3D7_1359800	0.76
PF3D7_0209600	PF3D7_0404900	0.718
PF3D7_0721600	PF3D7_1206200	0.944
PF3D7_0719500	PF3D7_1211700	0.745
PF3D7_0909800	PF3D7_1107100	0.826
PF3D7_0522600	PF3D7_1343100	0.729
PF3D7_0113300	PF3D7_0830500	0.757
PF3D7_0815200	PF3D7_1215200	0.934
PF3D7_0916000	PF3D7_1036000	0.751
PF3D7_1130200	PF3D7_1342000	0.999
PF3D7_1107100	PF3D7_1409300	0.792
PF3D7_0504600	PF3D7_0818900	0.747
PF3D7_0613800	PF3D7_1325900	0.87
PF3D7_0303200	PF3D7_0803200	0.718
PF3D7_0217900	PF3D7_0530200	0.736
PF3D7_1001500	PF3D7_1001900	0.768
PF3D7_1031200	PF3D7_1133400	0.768
PF3D7_0408500	PF3D7_0815500	0.769
PF3D7_1206000	PF3D7_1313500	0.764
PF3D7_1137200	PF3D7_1459900	0.793
PF3D7_0934800	PF3D7_1104900	0.827
PF3D7_0424100	PF3D7_1461400	0.811
PF3D7_0919100	PF3D7_1134000	0.95
PF3D7_1323400	PF3D7_1414300	0.999
PF3D7_0308900	PF3D7_1004400	0.941
PF3D7_1206600	PF3D7_1351400	0.884
PF3D7_0217800	PF3D7_1408600	0.999
PF3D7_0511000	PF3D7_1130100	0.899
PF3D7_0105800	PF3D7_1346900	0.889
PF3D7_0501000	PF3D7_0501200	0.963
PF3D7_1211400	PF3D7_1308200	0.716
PF3D7_1116100	PF3D7_1246200	0.879
PF3D7_0506900	PF3D7_0612700	0.729
PF3D7_0802100	PF3D7_1356100	0.896
PF3D7_0210600	PF3D7_1019900	0.767
PF3D7_0719600	PF3D7_1461200	0.995
PF3D7_0403900	PF3D7_1019600	0.893
PF3D7_0405900	PF3D7_0932100	0.836
PF3D7_0307200	PF3D7_0710900	0.945
PF3D7_0932000	PF3D7_1017500	0.772
PF3D7_0105400.2	PF3D7_1423300	0.797
PF3D7_0627500	PF3D7_1438900	0.865
PF3D7_0220800	PF3D7_1037500	0.765
PF3D7_0935900	PF3D7_1401400	0.747
PF3D7_1123900	PF3D7_1451900	0.764
PF3D7_0210600	PF3D7_0620400	0.87
PF3D7_0102200	PF3D7_0501300	0.763
PF3D7_1126200	PF3D7_1130100	0.993
PF3D7_0712400	PF3D7_1100200	0.721
PF3D7_0818100	PF3D7_1017100	0.713
PF3D7_0717500	PF3D7_1439500	0.8
PF3D7_0922500	PF3D7_1015900	0.999
PF3D7_0615500	PF3D7_1325400	0.715
PF3D7_0218000	PF3D7_0219600	0.998
PF3D7_0605000	PF3D7_0618300	0.997
PF3D7_0218000	PF3D7_1355100	0.889
PF3D7_0515400	PF3D7_1143100	0.901
PF3D7_0810300	PF3D7_1145200	0.959
PF3D7_0105300	PF3D7_1001600	0.71
PF3D7_1306900	PF3D7_1316500	0.71
PF3D7_0730900	PF3D7_0920800	0.718
PF3D7_0316700	PF3D7_1358700	0.776
PF3D7_0423300	PF3D7_1243400	0.746
PF3D7_0320800	PF3D7_1209200	0.989
PF3D7_1136200	PF3D7_1315300	0.756
PF3D7_0405100	PF3D7_0822600	0.992
PF3D7_1319400	PF3D7_1456000	0.781
PF3D7_1331800	PF3D7_1424100	0.999
PF3D7_0528400	PF3D7_1313600	0.769
PF3D7_1021500	PF3D7_1451900	0.926
PF3D7_0932100	PF3D7_1223000	0.777
PF3D7_0405200	PF3D7_1232500	0.742
PF3D7_1108700	PF3D7_1356700	0.808
PF3D7_0618000	PF3D7_1436200	0.87
PF3D7_0722200	PF3D7_1417300	0.73
PF3D7_0620400	PF3D7_1126700	0.87
PF3D7_0305700	PF3D7_1429900	0.753
PF3D7_0317200	PF3D7_1227600	0.873
PF3D7_0908500	PF3D7_1365600	0.735
PF3D7_1252100	PF3D7_1412000	0.919
PF3D7_0804600	PF3D7_1111000	0.785
PF3D7_0404700	PF3D7_1412000	0.881
PF3D7_0409800	PF3D7_1332800	0.898
PF3D7_0503800	PF3D7_1358800	0.999
PF3D7_0409600	PF3D7_1211700	0.97
PF3D7_0503600	PF3D7_1027700.2	0.747
PF3D7_0215800	PF3D7_1306200	0.719
PF3D7_0722600	PF3D7_1129400	0.811
PF3D7_0905400	PF3D7_1356100	0.888
PF3D7_0419400	PF3D7_1223100	0.774
PF3D7_0527900	PF3D7_1224300	0.756
PF3D7_0602400	PF3D7_1472700	0.9
PF3D7_0207700	PF3D7_1033900	0.761
PF3D7_0615400	PF3D7_1307000	0.922
PF3D7_0207600	PF3D7_1027300	0.734
PF3D7_1302600	PF3D7_1407100	0.754
PF3D7_0501500	PF3D7_0918000	0.783
PF3D7_0404700	PF3D7_1313500	0.848
PF3D7_0509400	PF3D7_0920800	0.931
PF3D7_1321500.2	PF3D7_1463900	0.794
PF3D7_0704500	PF3D7_0821000	0.726
PF3D7_1349200	PF3D7_1433500	0.849
PF3D7_0507400	PF3D7_1014100	0.904
PF3D7_0319500	PF3D7_1420000	0.983
PF3D7_1321500.2	PF3D7_1471400	0.918
PF3D7_0416500	PF3D7_1227000	0.74
PF3D7_0803200	PF3D7_0930300	0.874
PF3D7_1323700	PF3D7_1358400	0.781
PF3D7_0507400	PF3D7_1410400	0.719
PF3D7_0615500	PF3D7_1104900	0.806
PF3D7_0507500	PF3D7_0934600	0.892
PF3D7_0204500	PF3D7_1436000	0.702
PF3D7_0917000	PF3D7_1328200	0.741
PF3D7_0319000	PF3D7_1134300	0.77
PF3D7_0105400.2	PF3D7_1118700	0.816
PF3D7_1020300	PF3D7_1245600	0.707
PF3D7_0611600	PF3D7_1315300	0.87
PF3D7_0319400	PF3D7_1319400	0.742
PF3D7_0109800	PF3D7_1225100	0.867
PF3D7_0830600	PF3D7_1102700	0.868
PF3D7_0419800	PF3D7_0826700	0.744
PF3D7_0508100	PF3D7_1322500	0.798
PF3D7_1234900	PF3D7_1430900	0.769
PF3D7_0317200	PF3D7_0508100	0.784
PF3D7_1351700	PF3D7_1417400	0.751
PF3D7_0414000	PF3D7_1226600	0.753
PF3D7_0414900	PF3D7_0525800	0.948
PF3D7_1137200	PF3D7_1435600	0.897
PF3D7_0407700	PF3D7_1322500	0.758
PF3D7_0813600	PF3D7_1424100	0.726
PF3D7_0725200	PF3D7_0909800	0.712
PF3D7_0307700	PF3D7_0927600	0.857
PF3D7_1017100	PF3D7_1037500	0.726
PF3D7_0310400	PF3D7_0715200	0.763
PF3D7_0903700	PF3D7_1356900	0.85
PF3D7_0317600	PF3D7_1246800	0.9
PF3D7_0804500	PF3D7_1343300	0.767
PF3D7_0314800	PF3D7_0817700	0.777
PF3D7_0103800	PF3D7_1037500	0.827
PF3D7_0322900	PF3D7_1216300	0.91
PF3D7_0527000	PF3D7_1417800	0.999
PF3D7_0504400	PF3D7_1304900	0.905
PF3D7_0105300	PF3D7_0507200	0.899
PF3D7_0520000	PF3D7_1309100	0.999
PF3D7_0507400	PF3D7_0818100	0.936
PF3D7_0914100	PF3D7_1116100	0.704
PF3D7_0306800	PF3D7_0307200	0.768
PF3D7_0918300	PF3D7_1342000	0.979
PF3D7_0321400	PF3D7_1321500.2	0.722
PF3D7_0906500	PF3D7_1116800	0.706
PF3D7_0209600	PF3D7_1208400	0.738
PF3D7_0214600	PF3D7_0304100	0.91
PF3D7_0803800	PF3D7_1338100	0.999
PF3D7_0929400	PF3D7_1136700.2	0.716
PF3D7_0803700	PF3D7_1037500	0.838
PF3D7_1124900	PF3D7_1245400	0.993
PF3D7_0415600	PF3D7_1366500	0.949
PF3D7_1309500	PF3D7_1323100	0.723
PF3D7_0707300	PF3D7_0905400	0.95
PF3D7_0414900	PF3D7_1351700	0.958
PF3D7_1019600	PF3D7_1320700	0.889
PF3D7_0917900	PF3D7_1229500	0.842
PF3D7_0306800	PF3D7_1211800	0.719
PF3D7_1022700	PF3D7_1104900	0.82
PF3D7_1248900	PF3D7_1328100	0.998
PF3D7_1035900	PF3D7_1313500	0.752
PF3D7_0102900	PF3D7_0320300	0.846
PF3D7_0714500	PF3D7_1030000	0.978
PF3D7_0422400	PF3D7_1026800	0.999
PF3D7_1224300	PF3D7_1424400	0.934
PF3D7_1351400	PF3D7_1450100	0.981
PF3D7_0409200	PF3D7_0816000	0.82
PF3D7_1118700	PF3D7_1251200	0.844
PF3D7_0507200	PF3D7_0522400	0.797
PF3D7_0525300	PF3D7_1232600	0.731
PF3D7_0816000	PF3D7_1358100	0.706
PF3D7_0905900	PF3D7_1145100	0.999
PF3D7_0309600	PF3D7_1367600	0.88
PF3D7_1143200	PF3D7_1335100	0.866
PF3D7_0207500	PF3D7_1247500	0.703
PF3D7_0902100	PF3D7_1417400	0.901
PF3D7_0530300	PF3D7_1439400	0.707
PF3D7_0721600	PF3D7_1215300	0.758
PF3D7_0419700	PF3D7_0507200	0.714
PF3D7_1031400.2	PF3D7_1035100	0.79
PF3D7_0509400	PF3D7_1209200	0.71
PF3D7_0417200	PF3D7_1457200	0.747
PF3D7_0105300	PF3D7_1436600	0.826
PF3D7_0501600	PF3D7_1246200	0.861
PF3D7_0418100	PF3D7_0925400	0.938
PF3D7_0502800	PF3D7_1438900	0.733
PF3D7_0402300	PF3D7_1342600	0.898
PF3D7_0620400	PF3D7_0810300	0.75
PF3D7_1019600	PF3D7_1472600	0.778
PF3D7_0723800	PF3D7_1211700	0.714
PF3D7_1146000	PF3D7_1428300	0.99
PF3D7_0621100	PF3D7_1435600	0.851
PF3D7_1130100	PF3D7_1130200	0.991
PF3D7_1126700	PF3D7_1472600	0.851
PF3D7_0202500	PF3D7_0814500	0.733
PF3D7_0106800	PF3D7_1406700	0.786
PF3D7_1143200	PF3D7_1325400	0.705
PF3D7_1004000	PF3D7_1429700	0.978
PF3D7_1025400	PF3D7_1463900	0.907
PF3D7_0918300	PF3D7_1004000	0.969
PF3D7_0207100	PF3D7_1116100	0.777
PF3D7_0213100	PF3D7_1473200	0.825
PF3D7_0708800	PF3D7_1414300	0.808
PF3D7_0402300	PF3D7_0414900	0.916
PF3D7_0307200	PF3D7_1338200	0.999
PF3D7_0800300	PF3D7_0809100	0.793
PF3D7_0922500	PF3D7_1005500	0.776
PF3D7_0105800	PF3D7_1013600	0.709
PF3D7_1133200	PF3D7_1440100	0.786
PF3D7_0423800	PF3D7_1222700	0.862
PF3D7_0815500	PF3D7_1224100	0.701
PF3D7_0817600	PF3D7_1410400	0.895
PF3D7_0203700	PF3D7_1251600	0.848
PF3D7_0317000	PF3D7_1474800	0.999
PF3D7_0309600	PF3D7_1465900	0.999
PF3D7_0904400	PF3D7_1341200	0.902
PF3D7_0704300	PF3D7_1328000	0.73
PF3D7_0725400	PF3D7_1012200	0.783
PF3D7_1211700	PF3D7_1226600	0.993
PF3D7_0424100	PF3D7_1335300	0.993
PF3D7_0318200	PF3D7_0613400	0.811
PF3D7_0525800	PF3D7_1133400	0.896
PF3D7_0807500	PF3D7_0918300	0.741
PF3D7_0414900	PF3D7_1361800	0.88
PF3D7_0911000	PF3D7_1315600	0.864
PF3D7_0826700	PF3D7_1124900	0.95
PF3D7_1037100	PF3D7_1415200	0.9
PF3D7_0417200	PF3D7_1436800	0.728
PF3D7_0418600	PF3D7_0525800	0.9
PF3D7_1035500	PF3D7_1036500	0.716
PF3D7_1313600	PF3D7_1315300	0.756
PF3D7_0212300	PF3D7_0517000	0.919
PF3D7_0904400	PF3D7_1365900	0.924
PF3D7_0614500	PF3D7_1224300	0.916
PF3D7_0209600	PF3D7_0919400	0.754
PF3D7_0802100	PF3D7_0905400	0.905
PF3D7_0822900	PF3D7_1335400	0.866
PF3D7_0219700	PF3D7_1114200	0.749
PF3D7_0318200	PF3D7_0822300	0.9
PF3D7_0310400	PF3D7_0611600	0.862
PF3D7_0715900	PF3D7_0910900	0.793
PF3D7_1012200	PF3D7_1335100	0.891
PF3D7_0612200	PF3D7_0924600	0.829
PF3D7_1117400	PF3D7_1235200	0.74
PF3D7_0821000	PF3D7_1141800	0.701
PF3D7_0510100	PF3D7_1306200	0.826
PF3D7_0608800	PF3D7_1007700	0.74
PF3D7_0113700	PF3D7_1201500	0.78
PF3D7_0830600	PF3D7_1478100	0.833
PF3D7_0731500	PF3D7_0919300	0.84
PF3D7_1019400	PF3D7_1216300	0.921
PF3D7_1019500.2	PF3D7_1328200	0.708
PF3D7_0214700	PF3D7_0808200	0.908
PF3D7_1001600	PF3D7_1211700	0.846
PF3D7_0519100	PF3D7_1206600	0.872
PF3D7_0527000	PF3D7_1224500	0.851
PF3D7_1035100	PF3D7_1121300	0.742
PF3D7_0218400	PF3D7_0509400	0.741
PF3D7_0931800	PF3D7_1311500	0.998
PF3D7_0626800	PF3D7_1015900	0.999
PF3D7_0614500	PF3D7_0621800	0.763
PF3D7_0509100	PF3D7_1239500	0.885
PF3D7_1222300	PF3D7_1462800	0.735
PF3D7_0630900	PF3D7_1367600	0.811
PF3D7_0818400	PF3D7_1217200	0.807
PF3D7_1433600	PF3D7_1441200	0.9
PF3D7_0214700	PF3D7_0402300	0.861
PF3D7_0932100	PF3D7_1356800	0.817
PF3D7_0927600	PF3D7_1021900	0.763
PF3D7_0318200	PF3D7_1332900	0.926
PF3D7_1419800.2	PF3D7_1433500	0.728
PF3D7_0317800	PF3D7_1248900	0.987
PF3D7_0308600	PF3D7_1418000	0.701
PF3D7_1017500	PF3D7_1036500	0.811
PF3D7_0919400	PF3D7_1364100	0.888
PF3D7_1143400	PF3D7_1144000	0.947
PF3D7_0608500	PF3D7_1224300	0.9
PF3D7_0407700	PF3D7_0530900	0.859
PF3D7_1008800	PF3D7_1118600	0.737
PF3D7_0301600	PF3D7_1344900	0.735
PF3D7_0811000	PF3D7_1321500.2	0.729
PF3D7_0910900	PF3D7_1463300	0.997
PF3D7_1017100	PF3D7_1029900	0.758
PF3D7_1003600	PF3D7_1301600	0.903
PF3D7_1019400	PF3D7_1429700	0.895
PF3D7_1307100	PF3D7_1415800	0.773
PF3D7_1124800	PF3D7_1143300	0.805
PF3D7_0501300	PF3D7_1001500	0.926
PF3D7_1019600	PF3D7_1467900	0.762
PF3D7_0323400	PF3D7_1318700	0.811
PF3D7_1145200	PF3D7_1469200	0.722
PF3D7_1409300	PF3D7_1414000	0.808
PF3D7_0717500	PF3D7_1332200	0.724
PF3D7_0207600	PF3D7_1118700	0.731
PF3D7_0828600	PF3D7_0932100	0.793
PF3D7_0905900	PF3D7_1246300	0.769
PF3D7_0528400	PF3D7_1035300	0.932
PF3D7_0307100	PF3D7_1465900	0.999
PF3D7_0318500	PF3D7_1035300	0.891
PF3D7_1030000	PF3D7_1406200	0.88
PF3D7_0517000	PF3D7_1211800	0.796
PF3D7_0317000	PF3D7_0916700	0.9
PF3D7_0811900	PF3D7_1345400	0.763
PF3D7_1409900	PF3D7_1471400	0.908
PF3D7_0415900	PF3D7_1121600	0.722
PF3D7_1003400	PF3D7_1137200	0.754
PF3D7_0719300	PF3D7_0820000	0.882
PF3D7_0102700	PF3D7_1352900	0.713
PF3D7_0309600	PF3D7_1006200	0.797
PF3D7_0704800	PF3D7_1323700	0.797
PF3D7_0522600	PF3D7_1019500.2	0.719
PF3D7_1234200	PF3D7_1304900	0.74
PF3D7_1229800	PF3D7_1308000	0.811
PF3D7_1211800	PF3D7_1441200	0.868
PF3D7_1005800	PF3D7_1412000	0.767
PF3D7_0410700	PF3D7_0931100	0.953
PF3D7_0818200	PF3D7_0934800	0.725
PF3D7_1433500	PF3D7_1435300	0.855
PF3D7_1029900	PF3D7_1323700	0.891
PF3D7_0308600	PF3D7_1468800	0.779
PF3D7_1007300	PF3D7_1143100	0.899
PF3D7_0319100	PF3D7_0624500	0.953
PF3D7_0905400	PF3D7_1228600	0.929
PF3D7_0504200	PF3D7_1008900	0.902
PF3D7_1019400	PF3D7_1468700	0.805
PF3D7_0517300	PF3D7_1004400	0.946
PF3D7_0525300	PF3D7_1342600	0.897
PF3D7_0308900	PF3D7_1306900	0.752
PF3D7_0530900	PF3D7_1228600	0.812
PF3D7_0305600	PF3D7_1304100	0.859
PF3D7_0307400	PF3D7_0803500	0.733
PF3D7_0501500	PF3D7_1035300	0.896
PF3D7_0612900	PF3D7_1323400	0.847
PF3D7_0918000	PF3D7_1252100	0.858
PF3D7_1364100	PF3D7_1420700	0.726
PF3D7_1136900	PF3D7_1335400	0.851
PF3D7_1003500	PF3D7_1132700	0.999
PF3D7_0210600	PF3D7_1017500	0.904
PF3D7_0527000	PF3D7_1410700	0.724
PF3D7_0530900	PF3D7_0802600	0.86
PF3D7_0307400	PF3D7_1330600	0.718
PF3D7_0103800	PF3D7_0508200	0.785
PF3D7_0805200	PF3D7_1028700	0.872
PF3D7_1110200	PF3D7_1325000	0.934
PF3D7_1123900	PF3D7_1331800	0.872
PF3D7_0611700	PF3D7_1414300	0.999
PF3D7_1025400	PF3D7_1341500	0.826
PF3D7_0404700	PF3D7_0934800	0.919
PF3D7_0523000	PF3D7_1324900	0.731
PF3D7_1460600	PF3D7_1468400	0.778
PF3D7_1206600	PF3D7_1364800	0.987
PF3D7_1419100	PF3D7_1437200	0.9
PF3D7_0406500	PF3D7_0606600	0.918
PF3D7_0404900	PF3D7_1009700	0.775
PF3D7_0104100	PF3D7_1035100	0.754
PF3D7_0707300	PF3D7_1238600	0.713
PF3D7_0520600	PF3D7_1364800	0.942
PF3D7_0830500	PF3D7_1252900	0.903
PF3D7_1451100	PF3D7_1461200	0.96
PF3D7_0212600	PF3D7_0911100	0.778
PF3D7_1134700	PF3D7_1451900	0.915
PF3D7_0522500	PF3D7_0821000	0.781
PF3D7_0203200	PF3D7_1301600	0.706
PF3D7_0507500	PF3D7_1335100	0.844
PF3D7_0203000	PF3D7_0723300	0.979
PF3D7_0821700	PF3D7_1210000	0.773
PF3D7_1356800	PF3D7_1361800	0.859
PF3D7_0610400	PF3D7_1105000	0.995
PF3D7_0108300	PF3D7_0729300	0.807
PF3D7_1014100	PF3D7_1116100	0.846
PF3D7_0827900	PF3D7_1451100	0.841
PF3D7_0602400	PF3D7_0721600	0.98
PF3D7_0307200	PF3D7_1424400	0.999
PF3D7_0407700	PF3D7_1238600	0.783
PF3D7_0719700	PF3D7_1124900	0.983
PF3D7_0317000	PF3D7_0907700	0.967
PF3D7_0207100	PF3D7_1035300	0.743
PF3D7_0932300	PF3D7_1311800	0.929
PF3D7_0215700	PF3D7_1424400	0.78
PF3D7_0707300	PF3D7_1029900	0.87
PF3D7_0818900	PF3D7_1229500	0.861
PF3D7_0822000	PF3D7_1472700	0.954
PF3D7_0214700	PF3D7_0828800	0.753
PF3D7_0316800	PF3D7_0522500	0.906
PF3D7_0804600	PF3D7_1417500	0.839
PF3D7_0305600	PF3D7_0307400	0.781
PF3D7_0813100	PF3D7_1025400	0.913
PF3D7_0423500	PF3D7_1361800	0.927
PF3D7_0924600	PF3D7_1011800	0.934
PF3D7_0908500	PF3D7_1136200	0.881
PF3D7_1110600	PF3D7_1124900	0.982
PF3D7_1338200	PF3D7_1465900	0.999
PF3D7_1249900	PF3D7_1307100	0.712
PF3D7_1126200	PF3D7_1415800	0.818
PF3D7_0612900	PF3D7_0623100	0.712
PF3D7_1317800	PF3D7_1465900	0.999
PF3D7_0612700	PF3D7_1410400	0.804
PF3D7_1020900	PF3D7_1144900	0.833
PF3D7_1104200	PF3D7_1361900	0.838
PF3D7_0911100	PF3D7_1009700	0.802
PF3D7_0608800	PF3D7_1405600	0.726
PF3D7_0317600	PF3D7_1134700	0.872
PF3D7_1012600	PF3D7_1230600	0.832
PF3D7_0405900	PF3D7_1019100	0.814
PF3D7_0522600	PF3D7_0802800	0.919
PF3D7_0816000	PF3D7_1323900	0.743
PF3D7_0717900	PF3D7_1125400	0.742
PF3D7_0414000	PF3D7_1318400	0.841
PF3D7_0716800	PF3D7_0826700	0.704
PF3D7_0520900	PF3D7_1427900	0.718
PF3D7_0509400	PF3D7_1217200	0.809
PF3D7_1357100	PF3D7_1462800	0.781
PF3D7_0807400	PF3D7_0830700	0.95
PF3D7_1123900	PF3D7_1234800	0.917
PF3D7_0519100	PF3D7_1004000	0.974
PF3D7_0913800	PF3D7_1016000	0.821
PF3D7_0915400	PF3D7_1436000	0.999
PF3D7_0322900	PF3D7_0517700	0.934
PF3D7_1247500	PF3D7_1409300	0.833
PF3D7_0403600	PF3D7_1228300	0.721
PF3D7_0701900	PF3D7_0702100	0.819
PF3D7_0217900	PF3D7_1113300	0.73
PF3D7_1435300	PF3D7_1436600	0.729
PF3D7_0923900	PF3D7_1364800	0.728
PF3D7_0911000	PF3D7_0919400	0.763
PF3D7_0924700	PF3D7_1414800	0.983
PF3D7_1435600	PF3D7_1439500	0.724
PF3D7_0717500	PF3D7_1037500	0.876
PF3D7_0307200	PF3D7_1107700	0.865
PF3D7_0904400	PF3D7_1338200	0.904
PF3D7_1012200	PF3D7_1027300	0.717
PF3D7_0931100	PF3D7_1367600	0.941
PF3D7_0621100	PF3D7_1035100	0.839
PF3D7_1325200	PF3D7_1433500	0.805
PF3D7_0110400	PF3D7_1461600	0.938
PF3D7_0214900	PF3D7_1206300	0.879
PF3D7_0504400	PF3D7_1143300	0.945
PF3D7_0320100	PF3D7_0509000	0.993
PF3D7_0210600	PF3D7_1310700	0.952
PF3D7_0410700	PF3D7_0613800	0.827
PF3D7_0708800	PF3D7_0813300	0.851
PF3D7_0802600	PF3D7_0803200	0.775
PF3D7_0907600	PF3D7_1243600	0.703
PF3D7_0903300	PF3D7_1426600	0.706
PF3D7_0818900	PF3D7_1408100	0.833
PF3D7_1105400	PF3D7_1216300	0.916
PF3D7_0905400	PF3D7_1406800	0.864
PF3D7_0306900	PF3D7_1309100	0.999
PF3D7_0102900	PF3D7_1225100	0.702
PF3D7_0419400	PF3D7_1019500.2	0.712
PF3D7_1036000	PF3D7_1223100	0.741
PF3D7_0528300	PF3D7_0828600	0.713
PF3D7_0813900	PF3D7_1341200	0.999
PF3D7_1140400	PF3D7_1436600	0.906
PF3D7_0607000	PF3D7_1019400	0.912
PF3D7_0612700	PF3D7_1136200	0.841
PF3D7_0302500	PF3D7_0916000	0.841
PF3D7_0515700	PF3D7_0817600	0.891
PF3D7_0415900	PF3D7_1027800	0.999
PF3D7_1100100	PF3D7_1200400	0.751
PF3D7_1114800	PF3D7_1132800	0.763
PF3D7_1243700	PF3D7_1335300	0.787
PF3D7_1103100	PF3D7_1421200	0.991
PF3D7_0404000	PF3D7_1459900	0.713
PF3D7_0206000	PF3D7_0934100	0.872
PF3D7_0405200	PF3D7_1313500	0.708
PF3D7_0316000	PF3D7_1310700	0.872
PF3D7_0716800	PF3D7_1003500	0.953
PF3D7_0920700	PF3D7_0934800	0.72
PF3D7_0916000	PF3D7_1430200	0.802
PF3D7_0515700	PF3D7_0613800	0.861
PF3D7_1303800	PF3D7_1328000	0.823
PF3D7_0219200	PF3D7_0316800	0.999
PF3D7_0320100	PF3D7_0416800	0.739
PF3D7_0312300	PF3D7_1474800	0.999
PF3D7_0312800	PF3D7_1338200	0.999
PF3D7_0320300	PF3D7_1332900	0.814
PF3D7_0918700	PF3D7_0935600	0.746
PF3D7_0310400	PF3D7_0802100	0.845
PF3D7_1367600	PF3D7_1424400	0.83
PF3D7_1003800	PF3D7_1307600	0.9
PF3D7_1217200	PF3D7_1419100	0.797
PF3D7_0621100	PF3D7_1345600	0.823
PF3D7_0415900	PF3D7_0913200	0.872
PF3D7_1021600	PF3D7_1462800	0.841
PF3D7_1027800	PF3D7_1129400	0.748
PF3D7_0507100	PF3D7_0818900	0.821
PF3D7_0607700	PF3D7_1321500.2	0.87
PF3D7_0704300	PF3D7_0820600	0.739
PF3D7_0402100	PF3D7_1016800	0.82
PF3D7_0310400	PF3D7_0902800	0.702
PF3D7_1140400	PF3D7_1351700	0.778
PF3D7_0701900	PF3D7_0830500	0.76
PF3D7_0501100.2	PF3D7_1123400	0.708
PF3D7_0312800	PF3D7_1323100	0.999
PF3D7_0520300	PF3D7_1420000	0.908
PF3D7_0618000	PF3D7_1003400	0.759
PF3D7_0624600	PF3D7_1105100	0.732
PF3D7_0628100	PF3D7_1009700	0.87
PF3D7_0203000	PF3D7_0730500	0.718
PF3D7_1115600	PF3D7_1134100	0.8
PF3D7_0419900	PF3D7_1354200	0.987
PF3D7_0719700	PF3D7_1123400	0.933
PF3D7_0501600	PF3D7_0707300	0.87
PF3D7_0402100	PF3D7_0727100	0.723
PF3D7_1461600	PF3D7_1468800	0.99
PF3D7_0710900	PF3D7_1341300	0.878
PF3D7_0608900	PF3D7_0917000	0.734
PF3D7_0319000	PF3D7_1322500	0.711
PF3D7_0531100	PF3D7_0723800	0.716
PF3D7_0611600	PF3D7_1107100	0.86
PF3D7_0721100	PF3D7_1366500	0.713
PF3D7_0410700	PF3D7_0802100	0.82
PF3D7_1210100	PF3D7_1324700	0.8
PF3D7_1128900	PF3D7_1356100	0.785
PF3D7_0904700	PF3D7_1440100	0.748
PF3D7_0312800	PF3D7_0522500	0.946
PF3D7_0803200	PF3D7_1221300	0.744
PF3D7_0214600	PF3D7_0423800	0.91
PF3D7_0813900	PF3D7_1142600	0.999
PF3D7_0630400	PF3D7_1322500	0.769
PF3D7_0803200	PF3D7_1471400	0.89
PF3D7_1301600	PF3D7_1310700	0.92
PF3D7_0303300	PF3D7_0518500	0.9
PF3D7_0805200	PF3D7_1133400	0.864
PF3D7_0108500	PF3D7_1252900	0.835
PF3D7_0904400	PF3D7_1242700	0.907
PF3D7_1414800	PF3D7_1452700	0.961
PF3D7_0509400	PF3D7_1308200	0.913
PF3D7_0723300	PF3D7_0905400	0.763
PF3D7_1030100	PF3D7_1332700	0.827
PF3D7_0729400	PF3D7_1115300	0.742
PF3D7_0817600	PF3D7_0930300	0.81
PF3D7_0308600	PF3D7_1439100	0.982
PF3D7_0303200	PF3D7_1118700	0.732
PF3D7_0320700	PF3D7_0413700	0.727
PF3D7_0216400	PF3D7_1324700	0.824
PF3D7_0613400	PF3D7_1143400	0.763
PF3D7_1121300	PF3D7_1321500.2	0.83
PF3D7_1409400	PF3D7_1471500	0.95
PF3D7_0302500	PF3D7_0423800	0.795
PF3D7_0711000	PF3D7_1011700	0.895
PF3D7_0704500	PF3D7_0831600	0.742
PF3D7_0619400	PF3D7_1352500	0.804
PF3D7_1123400	PF3D7_1367700	0.777
PF3D7_1007300	PF3D7_1229800	0.927
PF3D7_0729400	PF3D7_1319300	0.865
PF3D7_0424100	PF3D7_0620400	0.866
PF3D7_1037100	PF3D7_1439900	0.944
PF3D7_0623500	PF3D7_1342100	0.982
PF3D7_0404700	PF3D7_1031200	0.895
PF3D7_0402300	PF3D7_0803500	0.731
PF3D7_0212300	PF3D7_0721600	0.966
PF3D7_1017100	PF3D7_1035700	0.763
PF3D7_0731200	PF3D7_1201200	0.785
PF3D7_1145200	PF3D7_1209300	0.768
PF3D7_0407800	PF3D7_1235200	0.821
PF3D7_0105300	PF3D7_0508900	0.9
PF3D7_0612200	PF3D7_0831600	0.739
PF3D7_0204500	PF3D7_1022500	0.919
PF3D7_1414800	PF3D7_1420000	0.995
PF3D7_0704300	PF3D7_1112100	0.94
PF3D7_0504900	PF3D7_1036800	0.738
PF3D7_0422500	PF3D7_0626800	0.912
PF3D7_0417200	PF3D7_1427500	0.902
PF3D7_0410700	PF3D7_1451900	0.987
PF3D7_0608800	PF3D7_1239700	0.732
PF3D7_1032400	PF3D7_1328000	0.787
PF3D7_0408500	PF3D7_0917100	0.831
PF3D7_0501100.2	PF3D7_0501400	0.829
PF3D7_1017000	PF3D7_1332600	0.769
PF3D7_0405000	PF3D7_1202000	0.757
PF3D7_1310700	PF3D7_1435600	0.881
PF3D7_0528200	PF3D7_1010600	0.957
PF3D7_0815500	PF3D7_1143200	0.766
PF3D7_1120100	PF3D7_1446400	0.779
PF3D7_0821000	PF3D7_0923500	0.718
PF3D7_0303300	PF3D7_1014400	0.857
PF3D7_0322000	PF3D7_0527500	0.75
PF3D7_1447900	PF3D7_1454500	0.763
PF3D7_0303200	PF3D7_0713800	0.717
PF3D7_1035100	PF3D7_1345600	0.727
PF3D7_0828900	PF3D7_1430200	0.856
PF3D7_0813100	PF3D7_0828600	0.898
PF3D7_0302900	PF3D7_0627700	0.808
PF3D7_0803800	PF3D7_1224300	0.915
PF3D7_0919000	PF3D7_1023900	0.705
PF3D7_0720800	PF3D7_1366500	0.778
PF3D7_1416800	PF3D7_1442300	0.903
PF3D7_1238600	PF3D7_1436600	0.876
PF3D7_0105300	PF3D7_0423300	0.873
PF3D7_0109000	PF3D7_0801000	0.771
PF3D7_0717700	PF3D7_0807900	0.869
PF3D7_1251200	PF3D7_1301600	0.97
PF3D7_0919300	PF3D7_1026600	0.784
PF3D7_1136200	PF3D7_1455600	0.708
PF3D7_1005800	PF3D7_1459900	0.869
PF3D7_1351400	PF3D7_1365900	0.999
PF3D7_0613800	PF3D7_1343100	0.87
PF3D7_1405600	PF3D7_1466100	0.733
PF3D7_0730800.2	PF3D7_1001500	0.932
PF3D7_0516700	PF3D7_0726500	0.785
PF3D7_0503300	PF3D7_1110200	0.917
PF3D7_0711000	PF3D7_1434500	0.758
PF3D7_0802100	PF3D7_1023900	0.714
PF3D7_0817700	PF3D7_0932100	0.802
PF3D7_0522500	PF3D7_1034200	0.967
PF3D7_0402300	PF3D7_1035500	0.875
PF3D7_0308300	PF3D7_0418600	0.917
PF3D7_1035300	PF3D7_1469200	0.795
PF3D7_0323400	PF3D7_0629300	0.759
PF3D7_1367600	PF3D7_1429700	0.958
PF3D7_0424100	PF3D7_0525300	0.912
PF3D7_0214700	PF3D7_0618000	0.864
PF3D7_1216300	PF3D7_1358800	0.904
PF3D7_0817600	PF3D7_0822900	0.874
PF3D7_1019400	PF3D7_1332800	0.983
PF3D7_0308300	PF3D7_1412000	0.776
PF3D7_0305700	PF3D7_0606200	0.925
PF3D7_1003800	PF3D7_1110200	0.96
PF3D7_0311300	PF3D7_1409300	0.713
PF3D7_0613400	PF3D7_0827500	0.966
PF3D7_1110200	PF3D7_1209200	0.944
PF3D7_0314800	PF3D7_0321100	0.842
PF3D7_0926700	PF3D7_1313000	0.715
PF3D7_0920800	PF3D7_1235700	0.794
PF3D7_1235200	PF3D7_1417300	0.753
PF3D7_0507100	PF3D7_0710900	0.975
PF3D7_0507200	PF3D7_0607700	0.87
PF3D7_0612200	PF3D7_1227600	0.769
PF3D7_1361900	PF3D7_1427500	0.986
PF3D7_0406400	PF3D7_1232200	0.759
PF3D7_1241800	PF3D7_1415200	0.959
PF3D7_1308300	PF3D7_1429700	0.824
PF3D7_0920800	PF3D7_1015900	0.891
PF3D7_1309300	PF3D7_1439100	0.884
PF3D7_1235300	PF3D7_1435300	0.756
PF3D7_1239700	PF3D7_1443900	0.704
PF3D7_1035100	PF3D7_1313600	0.837
PF3D7_1107700	PF3D7_1241800	0.989
PF3D7_1132200	PF3D7_1435300	0.802
PF3D7_0708800	PF3D7_1002800	0.795
PF3D7_1438900	PF3D7_1457200	0.967
PF3D7_0415500	PF3D7_0520300	0.915
PF3D7_1130200	PF3D7_1308300	0.985
PF3D7_0531100	PF3D7_1128900	0.758
PF3D7_1324900	PF3D7_1419800.2	0.745
PF3D7_0611600	PF3D7_1453200	0.705
PF3D7_0109000	PF3D7_1461400	0.905
PF3D7_1206000	PF3D7_1232500	0.772
PF3D7_1361900	PF3D7_1463200	0.999
PF3D7_1037500	PF3D7_1412000	0.896
PF3D7_0621100	PF3D7_1235200	0.87
PF3D7_0615400	PF3D7_0909400	0.739
PF3D7_0306900	PF3D7_1130200	0.998
PF3D7_0528300	PF3D7_1323700	0.74
PF3D7_0716800	PF3D7_1447000	0.964
PF3D7_0831600	PF3D7_1117400	0.848
PF3D7_1130100	PF3D7_1460700	0.999
PF3D7_0516200	PF3D7_1431700	0.999
PF3D7_0503300	PF3D7_1364800	0.91
PF3D7_0817600	PF3D7_1439500	0.836
PF3D7_0516200	PF3D7_1124900	0.999
PF3D7_0215700	PF3D7_1418900	0.908
PF3D7_0814300	PF3D7_1226700	0.814
PF3D7_1012600	PF3D7_1464900	0.783
PF3D7_1014600	PF3D7_1329100	0.714
PF3D7_1357800	PF3D7_1424400	0.819
PF3D7_0321100	PF3D7_0924600	0.707
PF3D7_1104900	PF3D7_1431400	0.785
PF3D7_0918700	PF3D7_1252400	0.877
PF3D7_0219200	PF3D7_0903900	0.999
PF3D7_0307700	PF3D7_0704300	0.78
PF3D7_0217500	PF3D7_1431400	0.729
PF3D7_0721100	PF3D7_1239700	0.711
PF3D7_0531100	PF3D7_1409300	0.711
PF3D7_1326000	PF3D7_1361700	0.707
PF3D7_0409600	PF3D7_1143300	0.72
PF3D7_1342600	PF3D7_1468400	0.862
PF3D7_0613800	PF3D7_1416200	0.809
PF3D7_0604100	PF3D7_1029900	0.87
PF3D7_0807900	PF3D7_1367700	0.841
PF3D7_0307100	PF3D7_1338200	0.988
PF3D7_0710900	PF3D7_1142600	0.871
PF3D7_0621100	PF3D7_1145200	0.87
PF3D7_0611600	PF3D7_1410800	0.742
PF3D7_0611600	PF3D7_0934800	0.87
PF3D7_1329300	PF3D7_1472200	0.829
PF3D7_0207700	PF3D7_0806300	0.713
PF3D7_0509400	PF3D7_1027800	0.804
PF3D7_0530900	PF3D7_1019100	0.896
PF3D7_1003300	PF3D7_1012600	0.832
PF3D7_0826700	PF3D7_1357900	0.769
PF3D7_1429700	PF3D7_1460700	0.768
PF3D7_0307600	PF3D7_1303800	0.804
PF3D7_0507500	PF3D7_1007300	0.927
PF3D7_0323400	PF3D7_1436600	0.728
PF3D7_0217500	PF3D7_0907500	0.703
PF3D7_0813900	PF3D7_1433500	0.797
PF3D7_0302200	PF3D7_1235200	0.755
PF3D7_0613300	PF3D7_1140400	0.825
PF3D7_1304500	PF3D7_1437900	0.781
PF3D7_0307100	PF3D7_1408600	0.999
PF3D7_0822900	PF3D7_0913800	0.898
PF3D7_1308200	PF3D7_1365900	0.879
PF3D7_0722400	PF3D7_1325100	0.758
PF3D7_1365900	PF3D7_1474800	0.949
PF3D7_0407700	PF3D7_0914100	0.704
PF3D7_0424700	PF3D7_1148700	0.879
PF3D7_0418600	PF3D7_1143100	0.92
PF3D7_0203700	PF3D7_1302600	0.748
PF3D7_0410700	PF3D7_0932100	0.87
PF3D7_0509400	PF3D7_1322100	0.762
PF3D7_0502000	PF3D7_1439300	0.953
PF3D7_1104900	PF3D7_1345600	0.744
PF3D7_0706400	PF3D7_1367600	0.73
PF3D7_0908300.2	PF3D7_1117100	0.786
PF3D7_1317800	PF3D7_1424100	0.999
PF3D7_0308300	PF3D7_1468400	0.848
PF3D7_0810400	PF3D7_0916500	0.739
PF3D7_1008800	PF3D7_1209200	0.79
PF3D7_0207400	PF3D7_0305600	0.703
PF3D7_1121300	PF3D7_1138500	0.718
PF3D7_0319000	PF3D7_1317100	0.729
PF3D7_0515700	PF3D7_1452000	0.919
PF3D7_1145200	PF3D7_1146600	0.87
PF3D7_0511000	PF3D7_0517000	0.725
PF3D7_0720400	PF3D7_1457200	0.714
PF3D7_0710600	PF3D7_1323100	0.999
PF3D7_0207800	PF3D7_0817700	0.834
PF3D7_1035700	PF3D7_1235200	0.731
PF3D7_0203700	PF3D7_1028400	0.953
PF3D7_0302500	PF3D7_0407700	0.75
PF3D7_0405200	PF3D7_1013800	0.767
PF3D7_0501600	PF3D7_1436600	0.892
PF3D7_0515700	PF3D7_1129300	0.735
PF3D7_0109000	PF3D7_1323700	0.887
PF3D7_1030100	PF3D7_1450700	0.99
PF3D7_0308300	PF3D7_1335100	0.735
PF3D7_1116100	PF3D7_1223100	0.902
PF3D7_0818100	PF3D7_1003600	0.901
PF3D7_0210000	PF3D7_1027800	0.96
PF3D7_0528300	PF3D7_1104900	0.889
PF3D7_1009700	PF3D7_1310700	0.858
PF3D7_0701900	PF3D7_1102700	0.812
PF3D7_0511000	PF3D7_1465900	0.993
PF3D7_0105300	PF3D7_0916000	0.806
PF3D7_1031400.2	PF3D7_1455300	0.744
PF3D7_0908500	PF3D7_0911100	0.792
PF3D7_0703600	PF3D7_0802100	0.716
PF3D7_0618500	PF3D7_1430900	0.893
PF3D7_1126200	PF3D7_1330600	0.933
PF3D7_1118700	PF3D7_1351700	0.814
PF3D7_0207500	PF3D7_0905400	0.883
PF3D7_0723300	PF3D7_1031200	0.917
PF3D7_0306800	PF3D7_1012600	0.932
PF3D7_0305600	PF3D7_1409300	0.832
PF3D7_1216000	PF3D7_1445100	0.796
PF3D7_1328000	PF3D7_1456000	0.77
PF3D7_0210700	PF3D7_0423100	0.763
PF3D7_1118700	PF3D7_1472600	0.879
PF3D7_0523000	PF3D7_0527400	0.724
PF3D7_0711500	PF3D7_1412300	0.972
PF3D7_0619900	PF3D7_1414800	0.982
PF3D7_0705100	PF3D7_1228600	0.777
PF3D7_0415900	PF3D7_1129400	0.773
PF3D7_0812600	PF3D7_1322100	0.753
PF3D7_0205900	PF3D7_0312300	0.999
PF3D7_0419800	PF3D7_1358800	0.896
PF3D7_0209800	PF3D7_1211800	0.899
PF3D7_0617900	PF3D7_1118600	0.786
PF3D7_1370300	PF3D7_1401100	0.778
PF3D7_0722200	PF3D7_0828800	0.788
PF3D7_1106000	PF3D7_1364800	0.835
PF3D7_1013800	PF3D7_1229800	0.843
PF3D7_0102900	PF3D7_1332900	0.981
PF3D7_0102500	PF3D7_0919300	0.79
PF3D7_0219200	PF3D7_1246800	0.91
PF3D7_1409300	PF3D7_1437300	0.72
PF3D7_0318200	PF3D7_1323100	0.865
PF3D7_1338200	PF3D7_1367600	0.801
PF3D7_0209600	PF3D7_0802800	0.837
PF3D7_0508900	PF3D7_0927300	0.701
PF3D7_1322600	PF3D7_1436600	0.725
PF3D7_0507400	PF3D7_1335400	0.855
PF3D7_0318500	PF3D7_0828800	0.772
PF3D7_0317600	PF3D7_0522500	0.9
PF3D7_0902100	PF3D7_1009700	0.896
PF3D7_0630400	PF3D7_1307900	0.795
PF3D7_0304100	PF3D7_1129300	0.735
PF3D7_1325400	PF3D7_1446600	0.735
PF3D7_0919200	PF3D7_1013800	0.715
PF3D7_0801800	PF3D7_1458300	0.928
PF3D7_0822900	PF3D7_1140400	0.773
PF3D7_0423500	PF3D7_1412000	0.798
PF3D7_1031400.2	PF3D7_1351700	0.816
PF3D7_1212700	PF3D7_1312900	0.921
PF3D7_0707500	PF3D7_1114200	0.709
PF3D7_0708800	PF3D7_1222300	0.955
PF3D7_0110700	PF3D7_0809900	0.81
PF3D7_0528300	PF3D7_1007200	0.765
PF3D7_0405400	PF3D7_1126900	0.925
PF3D7_0927600	PF3D7_1227500	0.736
PF3D7_0530200	PF3D7_1218400	0.733
PF3D7_1143100	PF3D7_1401600	0.774
PF3D7_1444800	PF3D7_1453800	0.848
PF3D7_0212600	PF3D7_0618000	0.85
PF3D7_0312300	PF3D7_1011700	0.762
PF3D7_1030200	PF3D7_1204900	0.768
PF3D7_1116800	PF3D7_1356700	0.844
PF3D7_1132200	PF3D7_1222300	0.796
PF3D7_0528200	PF3D7_0721600	0.945
PF3D7_0105300	PF3D7_0207600	0.863
PF3D7_0828500	PF3D7_1010600	0.999
PF3D7_1409400	PF3D7_1436600	0.879
PF3D7_0216800	PF3D7_1209500.2	0.742
PF3D7_1117400	PF3D7_1321500.2	0.74
PF3D7_1130400	PF3D7_1338100	0.999
PF3D7_1330100	PF3D7_1470800	0.703
PF3D7_0730500	PF3D7_1325400	0.87
PF3D7_0215700	PF3D7_0605000	0.821
PF3D7_1348600	PF3D7_1436200	0.726
PF3D7_0305000	PF3D7_0317600	0.724
PF3D7_0312800	PF3D7_1426000	0.999
PF3D7_0515400	PF3D7_0525800	0.807
PF3D7_1026600	PF3D7_1332200	0.892
PF3D7_0503800	PF3D7_1367600	0.921
PF3D7_0109000	PF3D7_0525300	0.905
PF3D7_0920700	PF3D7_1223000	0.71
PF3D7_1357000	PF3D7_1465900	0.745
PF3D7_1236900	PF3D7_1358400	0.702
PF3D7_0517000	PF3D7_1424400	0.998
PF3D7_0219200	PF3D7_1106100	0.851
PF3D7_1341200	PF3D7_1461300	0.997
PF3D7_0423300	PF3D7_1014100	0.89
PF3D7_0709100	PF3D7_1331300	0.784
PF3D7_1238600	PF3D7_1439000	0.716
PF3D7_0718100	PF3D7_0920200	0.74
PF3D7_0618300	PF3D7_1414300	0.999
PF3D7_1140600	PF3D7_1307900	0.715
PF3D7_0214200	PF3D7_1323400	0.991
PF3D7_0214600	PF3D7_1125700	0.91
PF3D7_0803200	PF3D7_1463900	0.874
PF3D7_0303200	PF3D7_0810300	0.877
PF3D7_1317100	PF3D7_1448500	0.845
PF3D7_1104000	PF3D7_1332900	0.911
PF3D7_0920800	PF3D7_1249900	0.723
PF3D7_1001400	PF3D7_1351800.2	0.816
PF3D7_0818400	PF3D7_1461200	0.903
PF3D7_0306400	PF3D7_1012600	0.741
PF3D7_0831600	PF3D7_1036000	0.819
PF3D7_0217500	PF3D7_1037500	0.836
PF3D7_0311300	PF3D7_1435300	0.704
PF3D7_0306400	PF3D7_0310400	0.769
PF3D7_1351400	PF3D7_1426000	0.999
PF3D7_0104800	PF3D7_1203400	0.779
PF3D7_0612700	PF3D7_0620400	0.751
PF3D7_1020000	PF3D7_1030100	0.792
PF3D7_0822900	PF3D7_1410400	0.851
PF3D7_1424100	PF3D7_1445900	0.806
PF3D7_1133300	PF3D7_1437300	0.839
PF3D7_1331800	PF3D7_1461300	0.999
PF3D7_0708800	PF3D7_1465900	0.712
PF3D7_1236800	PF3D7_1364100	0.775
PF3D7_0501600	PF3D7_1358400	0.823
PF3D7_0206200	PF3D7_0525300	0.826
PF3D7_1136900	PF3D7_1310700	0.886
PF3D7_0820000	PF3D7_1364800	0.959
PF3D7_0317600	PF3D7_1242700	0.999
PF3D7_0416500	PF3D7_0806200	0.709
PF3D7_0937800	PF3D7_1240900	0.715
PF3D7_1224100	PF3D7_1449600	0.754
PF3D7_1342000	PF3D7_1426000	0.999
PF3D7_0415900	PF3D7_1366600	0.921
PF3D7_0708400	PF3D7_1324900	0.834
PF3D7_0317600	PF3D7_0719700	0.999
PF3D7_0301600	PF3D7_1302000	0.925
PF3D7_1361900	PF3D7_1429900	0.929
PF3D7_0719700	PF3D7_1105400	0.999
PF3D7_0307100	PF3D7_1245400	0.725
PF3D7_0609800	PF3D7_1009700	0.712
PF3D7_1228700	PF3D7_1440100	0.727
PF3D7_0319500	PF3D7_0508700	0.727
PF3D7_0507500	PF3D7_1035300	0.938
PF3D7_0903300	PF3D7_1321500.2	0.868
PF3D7_1113300	PF3D7_1306200	0.826
PF3D7_0916000	PF3D7_1435600	0.901
PF3D7_1126700	PF3D7_1337800	0.82
PF3D7_0611600	PF3D7_1322500	0.809
PF3D7_0402100	PF3D7_1337800	0.764
PF3D7_0730500	PF3D7_1232500	0.738
PF3D7_0108000	PF3D7_1248900	0.998
PF3D7_0507200	PF3D7_1410800	0.757
PF3D7_0214900	PF3D7_1136200	0.91
PF3D7_0905400	PF3D7_1003600	0.843
PF3D7_0616000	PF3D7_0621200	0.996
PF3D7_0215300	PF3D7_0902500	0.816
PF3D7_1402300	PF3D7_1474800	0.999
PF3D7_0403900	PF3D7_1328200	0.731
PF3D7_1028700	PF3D7_1035900	0.851
PF3D7_1118700	PF3D7_1136200	0.921
PF3D7_0414900	PF3D7_1344300	0.756
PF3D7_0729400	PF3D7_0811900	0.896
PF3D7_0412000	PF3D7_1014300	0.726
PF3D7_0508100	PF3D7_0530900	0.869
PF3D7_1242700	PF3D7_1424400	0.997
PF3D7_0308300	PF3D7_0404000	0.753
PF3D7_1216300	PF3D7_1246800	0.925
PF3D7_0422400	PF3D7_0719600	0.998
PF3D7_1014700	PF3D7_1125400	0.742
PF3D7_0615800	PF3D7_1442900	0.84
PF3D7_0911100	PF3D7_1316200	0.897
PF3D7_0827500	PF3D7_1450100	0.734
PF3D7_0730800.2	PF3D7_1110400	0.718
PF3D7_1109900	PF3D7_1323400	0.999
PF3D7_0816800	PF3D7_1107400	0.975
PF3D7_0307100	PF3D7_1026800	0.999
PF3D7_1035100	PF3D7_1439500	0.788
PF3D7_0507500	PF3D7_0902100	0.784
PF3D7_1238600	PF3D7_1406800	0.886
PF3D7_0828600	PF3D7_1235200	0.86
PF3D7_0307500	PF3D7_1405600	0.701
PF3D7_1356800	PF3D7_1365600	0.717
PF3D7_1104900	PF3D7_1310700	0.918
PF3D7_0934600	PF3D7_1468400	0.736
PF3D7_0219600	PF3D7_0505500	0.823
PF3D7_1144000	PF3D7_1357000	0.836
PF3D7_0917900	PF3D7_1015900	0.85
PF3D7_0932000	PF3D7_1143100	0.759
PF3D7_1222400	PF3D7_1359600	0.745
PF3D7_0508500	PF3D7_1463900	0.814
PF3D7_0307100	PF3D7_1331300	0.91
PF3D7_1444800	PF3D7_1446400	0.835
PF3D7_0219200	PF3D7_1414300	0.981
PF3D7_0323400	PF3D7_0914100	0.894
PF3D7_1343000	PF3D7_1347700	0.961
PF3D7_0301600	PF3D7_1008800	0.723
PF3D7_0302500	PF3D7_1031200	0.894
PF3D7_1224100	PF3D7_1406800	0.808
PF3D7_1415800	PF3D7_1461200	0.951
PF3D7_0603200	PF3D7_1462700	0.794
PF3D7_0507100	PF3D7_1142500	0.931
PF3D7_0209600	PF3D7_1325400	0.734
PF3D7_0215300	PF3D7_0402100	0.82
PF3D7_0524800	PF3D7_1448400	0.704
PF3D7_0829300	PF3D7_1414800	0.991
PF3D7_0307500	PF3D7_0320700	0.76
PF3D7_0828800	PF3D7_1351700	0.927
PF3D7_0717500	PF3D7_0831600	0.723
PF3D7_0100100	PF3D7_1240900	0.728
PF3D7_1232500	PF3D7_1235200	0.814
PF3D7_0618000	PF3D7_1238600	0.71
PF3D7_0613900	PF3D7_1036000	0.87
PF3D7_0528400	PF3D7_1223000	0.794
PF3D7_0518300	PF3D7_1328100	0.999
PF3D7_0506100	PF3D7_1317800	0.789
PF3D7_0606000	PF3D7_0830500	0.742
PF3D7_0416600	PF3D7_1324800	0.92
PF3D7_0217800	PF3D7_1366600	0.902
PF3D7_0931800	PF3D7_1365900	0.942
PF3D7_0721600	PF3D7_1323400	0.999
PF3D7_0707900	PF3D7_1027100	0.759
PF3D7_0610400	PF3D7_1406200	0.843
PF3D7_0320900	PF3D7_0629700	0.887
PF3D7_0109000	PF3D7_0423800	0.92
PF3D7_0410700	PF3D7_0802600	0.764
PF3D7_0207600	PF3D7_0806200	0.719
PF3D7_1226600	PF3D7_1304100	0.976
PF3D7_1137200	PF3D7_1236900	0.732
PF3D7_0934800	PF3D7_1410800	0.897
PF3D7_1014700	PF3D7_1354500	0.802
PF3D7_0103800	PF3D7_1213600	0.758
PF3D7_1246200	PF3D7_1342600	0.936
PF3D7_0925700	PF3D7_1118200	0.701
PF3D7_0718400	PF3D7_1212700	0.727
PF3D7_0607700	PF3D7_1320700	0.87
PF3D7_0609800	PF3D7_1410400	0.841
PF3D7_1137200	PF3D7_1232500	0.775
PF3D7_0830600	PF3D7_1149600	0.819
PF3D7_1018600	PF3D7_1461600	0.839
PF3D7_1408200	PF3D7_1456000	0.725
PF3D7_0213100	PF3D7_1134000	0.969
PF3D7_0306400	PF3D7_0705400	0.899
PF3D7_1001600	PF3D7_1325900	0.775
PF3D7_0713800	PF3D7_1420200	0.715
PF3D7_0306400	PF3D7_0815500	0.769
PF3D7_1030100	PF3D7_1227100	0.962
PF3D7_1209500.2	PF3D7_1252100	0.807
PF3D7_0414000	PF3D7_1317100	0.736
PF3D7_1011700	PF3D7_1435300	0.987
PF3D7_1218500	PF3D7_1352900	0.842
PF3D7_0930300	PF3D7_1476300	0.749
PF3D7_0419700	PF3D7_0525300	0.732
PF3D7_0407800	PF3D7_0414900	0.802
PF3D7_0818900	PF3D7_1130400	0.916
PF3D7_0818100	PF3D7_1356800	0.894
PF3D7_0519400	PF3D7_1461300	0.999
PF3D7_1014300	PF3D7_1228300	0.719
PF3D7_1322500	PF3D7_1323700	0.763
PF3D7_1012600	PF3D7_1015300	0.729
PF3D7_1036500	PF3D7_1251200	0.862
PF3D7_1027300	PF3D7_1438900	0.921
PF3D7_0530900	PF3D7_1133300	0.705
PF3D7_0820000	PF3D7_1309500	0.772
PF3D7_0611700	PF3D7_1132700	0.833
PF3D7_1031200	PF3D7_1232500	0.917
PF3D7_0202500	PF3D7_1102800	0.976
PF3D7_0511200	PF3D7_0731600	0.739
PF3D7_0919900	PF3D7_1364100	0.869
PF3D7_1204600	PF3D7_1366500	0.705
PF3D7_0719600	PF3D7_1129400	0.802
PF3D7_1103100	PF3D7_1204300	0.913
PF3D7_0405400	PF3D7_1452700	0.813
PF3D7_1015300	PF3D7_1143300	0.717
PF3D7_0526500	PF3D7_0923900	0.795
PF3D7_1211700	PF3D7_1463300	0.854
PF3D7_1037500	PF3D7_1316200	0.835
PF3D7_1361900	PF3D7_1463300	0.986
PF3D7_1011700	PF3D7_1317800	0.707
PF3D7_0714000	PF3D7_1327400	0.705
PF3D7_1251200	PF3D7_1361800	0.87
PF3D7_0217500	PF3D7_1344300	0.768
PF3D7_0402300	PF3D7_1252400	0.944
PF3D7_0817700	PF3D7_1358400	0.758
PF3D7_0621100	PF3D7_1236900	0.809
PF3D7_0902100	PF3D7_1136200	0.872
PF3D7_1227500	PF3D7_1238600	0.729
PF3D7_0424500	PF3D7_0623800	0.873
PF3D7_0219200	PF3D7_1130100	0.996
PF3D7_0105300	PF3D7_0609800	0.762
PF3D7_1031200	PF3D7_1206000	0.746
PF3D7_1357100	PF3D7_1447000	0.971
PF3D7_0409900	PF3D7_1211800	0.816
PF3D7_0308200	PF3D7_0608700	0.997
PF3D7_0528400	PF3D7_1037500	0.916
PF3D7_0214200	PF3D7_1012600	0.803
PF3D7_0210800	PF3D7_1404800	0.714
PF3D7_0106100	PF3D7_0804500	0.892
PF3D7_0725400	PF3D7_0817700	0.79
PF3D7_0530300	PF3D7_0820600	0.709
PF3D7_0817700	PF3D7_1359800	0.795
PF3D7_1232100	PF3D7_1308200	0.759
PF3D7_0503800	PF3D7_1465900	0.999
PF3D7_0605000	PF3D7_0613400	0.999
PF3D7_1028400	PF3D7_1249900	0.863
PF3D7_0303400	PF3D7_0806200	0.728
PF3D7_1358800	PF3D7_1424100	0.999
PF3D7_0102200	PF3D7_1133400	0.887
PF3D7_0919600	PF3D7_1426000	0.914
PF3D7_1409300	PF3D7_1409400	0.751
PF3D7_0520000	PF3D7_0614500	0.999
PF3D7_0614500	PF3D7_1414300	0.999
PF3D7_0323400	PF3D7_0817600	0.746
PF3D7_0403900	PF3D7_1452000	0.769
PF3D7_0522400	PF3D7_0609800	0.744
PF3D7_0823300	PF3D7_1472200	0.925
PF3D7_1019600	PF3D7_1426700	0.734
PF3D7_1035700	PF3D7_1472600	0.898
PF3D7_1109900	PF3D7_1216300	0.927
PF3D7_0903900	PF3D7_1309100	0.999
PF3D7_0105300	PF3D7_0410800	0.708
PF3D7_0415300	PF3D7_0729400	0.707
PF3D7_1117400	PF3D7_1361800	0.745
PF3D7_0707900	PF3D7_0719700	0.889
PF3D7_0609800	PF3D7_0817700	0.776
PF3D7_0207400	PF3D7_0404700	0.75
PF3D7_1110600	PF3D7_1472700	0.807
PF3D7_0105700	PF3D7_1460500	0.718
PF3D7_0729300	PF3D7_1424400	0.809
PF3D7_1324700	PF3D7_1332000	0.978
PF3D7_1308200	PF3D7_1311900	0.771
PF3D7_0108500	PF3D7_0318700	0.779
PF3D7_0109800	PF3D7_0717700	0.854
PF3D7_0319600	PF3D7_1447000	0.826
PF3D7_0705700	PF3D7_0719600	0.999
PF3D7_1145200	PF3D7_1452000	0.91
PF3D7_0826400	PF3D7_1331600	0.708
PF3D7_1011400	PF3D7_1129200	0.999
PF3D7_0217500	PF3D7_1459900	0.776
PF3D7_0903300	PF3D7_1448500	0.88
PF3D7_1003500	PF3D7_1103100	0.999
PF3D7_1016000	PF3D7_1341500	0.743
PF3D7_0607700	PF3D7_1322600	0.869
PF3D7_0424100	PF3D7_1016000	0.889
PF3D7_0219200	PF3D7_0813900	0.998
PF3D7_0503400	PF3D7_1238600	0.737
PF3D7_0212900	PF3D7_1235200	0.706
PF3D7_0522500	PF3D7_0613400	0.978
PF3D7_0614800	PF3D7_0917100	0.814
PF3D7_0613300	PF3D7_0618000	0.87
PF3D7_0808200	PF3D7_1014100	0.971
PF3D7_1206000	PF3D7_1310700	0.786
PF3D7_0821700	PF3D7_1445700	0.801
PF3D7_1224100	PF3D7_1321500.2	0.889
PF3D7_0210700	PF3D7_1125700	0.716
PF3D7_1414000	PF3D7_1474800	0.949
PF3D7_0209600	PF3D7_0935800	0.705
PF3D7_0423300	PF3D7_1017100	0.892
PF3D7_0607700	PF3D7_0723800	0.712
PF3D7_0621100	PF3D7_1307900	0.87
PF3D7_0516200	PF3D7_1367600	0.961
PF3D7_0322900	PF3D7_1431700	0.999
PF3D7_1004000	PF3D7_1424400	0.999
PF3D7_0918000	PF3D7_1246400	0.859
PF3D7_1030200	PF3D7_1412000	0.76
PF3D7_0302200	PF3D7_1140400	0.778
PF3D7_0214700	PF3D7_1327300	0.782
PF3D7_0918000	PF3D7_1033900	0.725
PF3D7_0409400	PF3D7_0917900	0.833
PF3D7_0710600	PF3D7_0903900	0.999
PF3D7_0317600	PF3D7_1342000	0.999
PF3D7_0314800	PF3D7_0802600	0.815
PF3D7_0818900	PF3D7_1211800	0.964
PF3D7_0403900	PF3D7_0919000	0.714
PF3D7_0905400	PF3D7_1022700	0.783
PF3D7_0816000	PF3D7_1461200	0.782
PF3D7_0320300	PF3D7_1211400	0.753
PF3D7_0911100	PF3D7_1463900	0.742
PF3D7_1035300	PF3D7_1136900	0.908
PF3D7_1129400	PF3D7_1428300	0.965
PF3D7_0319400	PF3D7_1317100	0.803
PF3D7_0615500	PF3D7_0909600	0.739
PF3D7_0311300	PF3D7_0719400	0.769
PF3D7_0318200	PF3D7_1355700	0.976
PF3D7_0902100	PF3D7_1252100	0.844
PF3D7_1320700	PF3D7_1435600	0.781
PF3D7_0827000	PF3D7_1008800	0.732
PF3D7_1020800	PF3D7_1108500	0.983
PF3D7_0708800	PF3D7_1357800	0.902
PF3D7_1130700	PF3D7_1355100	0.847
PF3D7_0731500	PF3D7_1310700	0.87
PF3D7_0904400	PF3D7_1460700	0.909
PF3D7_0402300	PF3D7_0525300	0.856
PF3D7_0815600	PF3D7_1019000	0.776
PF3D7_1308000	PF3D7_1417300	0.715
PF3D7_0628100	PF3D7_0828700	0.729
PF3D7_0623800	PF3D7_1455000	0.718
PF3D7_0934800	PF3D7_1412000	0.855
PF3D7_1110600	PF3D7_1441200	0.998
PF3D7_0708800	PF3D7_1443900	0.922
PF3D7_1124200	PF3D7_1412700	0.755
PF3D7_0723300	PF3D7_1460600	0.763
PF3D7_0604100	PF3D7_1121300	0.87
PF3D7_0705700	PF3D7_1424100	0.999
PF3D7_0822900	PF3D7_1118700	0.896
PF3D7_0822900	PF3D7_1401600	0.769
PF3D7_0217500	PF3D7_1035500	0.834
PF3D7_0705100	PF3D7_1031800	0.713
PF3D7_0506100	PF3D7_0818800	0.883
PF3D7_0620400	PF3D7_0725400	0.869
PF3D7_0708700	PF3D7_0902700	0.946
PF3D7_1011700	PF3D7_1418000	0.782
PF3D7_0405900	PF3D7_1227500	0.711
PF3D7_0423300	PF3D7_0525800	0.834
PF3D7_0713800	PF3D7_1472600	0.717
PF3D7_1315300	PF3D7_1320700	0.79
PF3D7_1036000	PF3D7_1335400	0.801
PF3D7_1366500	PF3D7_1424400	0.76
PF3D7_0507200	PF3D7_0508000	0.837
PF3D7_1211800	PF3D7_1435300	0.987
PF3D7_1209900	PF3D7_1236800	0.83
PF3D7_0322300	PF3D7_1028200	0.701
PF3D7_0105800	PF3D7_1321500.2	0.771
PF3D7_0704100	PF3D7_1121300	0.888
PF3D7_0105300	PF3D7_1458300	0.708
PF3D7_1227600	PF3D7_1228800	0.798
PF3D7_0407800	PF3D7_1452000	0.921
PF3D7_1006700	PF3D7_1417500	0.706
PF3D7_0207600	PF3D7_1140400	0.815
PF3D7_0610100	PF3D7_1246600	0.719
PF3D7_0102500	PF3D7_0911100	0.971
PF3D7_0505500	PF3D7_1318400	0.718
PF3D7_1144000	PF3D7_1358800	0.999
PF3D7_0618500	PF3D7_1020800	0.738
PF3D7_0405900	PF3D7_1017100	0.96
PF3D7_1019400	PF3D7_1246800	0.909
PF3D7_0817600	PF3D7_1332200	0.918
PF3D7_0423300	PF3D7_1342600	0.746
PF3D7_0302000	PF3D7_0405400	0.976
PF3D7_0218500	PF3D7_1439100	0.847
PF3D7_1237600	PF3D7_1367600	0.986
PF3D7_1103700	PF3D7_1441400	0.838
PF3D7_0409200	PF3D7_1307100	0.99
PF3D7_0626800	PF3D7_1234300	0.906
PF3D7_0919600	PF3D7_1447000	0.912
PF3D7_0210200	PF3D7_1303800	0.788
PF3D7_0303000	PF3D7_1243000	0.793
PF3D7_0709100	PF3D7_0908300.2	0.727
PF3D7_0113300	PF3D7_0501100.2	0.805
PF3D7_0413700	PF3D7_1361900	0.741
PF3D7_0615500	PF3D7_1462800	0.775
PF3D7_1143100	PF3D7_1423100	0.774
PF3D7_0615500	PF3D7_1364100	0.848
PF3D7_0919600	PF3D7_1331800	0.909
PF3D7_0312400	PF3D7_0715900	0.779
PF3D7_0504400	PF3D7_0708100	0.9
PF3D7_0415900	PF3D7_0519400	0.999
PF3D7_0403900	PF3D7_0917300	0.741
PF3D7_0528300	PF3D7_1012200	0.78
PF3D7_1013800	PF3D7_1025400	0.75
PF3D7_0531100	PF3D7_1116100	0.73
PF3D7_0828700	PF3D7_1209500.2	0.77
[truncated: 49,457 more rows]

## Sheet: M_network
Gene1	Gene2	Score
[truncated: 33,560 more rows]
