# Supplementary material for: A network-based approach reveals novel invasion and Maurer's clefts-related proteins in Plasmodium falciparum
Source: Royal Society of Chemistry journal article supplement (doi:10.1039/c9mo00124g), 2019-10-10
Supplement: c9mo00124g1.zip [file c9mo00124g1.zip › supplementary_file_4.xls]

## Sheet: Details
A network-based approach reveals novel invasion and Maurer’s clefts-related proteins in Plasmodium falciparum
Dibyajyoti Das, Sowmya Ramaswamy Krishnan, Arijit Roy* and Gopalakrishnan Bulusu*
TCS Innovation Labs – Hyderabad (Life Sciences Division), Tata Consultancy Services Limited, Hyderabad, India
* Corresponding author
E-mail: roy.arijit3@tcs.com, g.bulusu@tcs.com
Supplementary file 4: Invasion related seed and predicted proteins (along with Gene id, description) during each stage of intra-erythorocytic cycle. For predicted proteins, corresponding RWR score and p-values are also shown.
Tabs referring to stage specific results of Early Ring (ER), Late Ring (LR), Early Trophozoite (ET), Late Trophozoite (LT), Early Schizont (ES), Late Schizont (LS) and Merozoite (M)
Each tab contains the below details:
GeneID as in PlasmoDB
Seed/Predicted mentioning if the gene was part of the seed list or predicted using the RWR algorithm
p-value obtained from permutation test
RWR score as per the RWR algorithm. All predicted genes are ranked based on their RWR score
Description of the gene

## Sheet: ER
GeneID	Seed/Predicted	p-value	RWR Score	Description
PF3D7_0424100	SEED			reticulocyte binding protein homologue 5 (RH5)
PF3D7_0102500	SEED			erythrocyte binding antigen-181 (EBA181)
PF3D7_1133400	SEED			apical membrane antigen 1 (AMA1)
PF3D7_0731500	SEED			erythrocyte binding antigen-175 (EBA175)
PF3D7_1301600	SEED			erythrocyte binding antigen-140 (EBA140)
PF3D7_0402300	SEED			reticulocyte binding protein homologue 1 (RH1)
PF3D7_1028700	SEED			merozoite TRAP-like protein (MTRAP)
PF3D7_1035500	SEED			merozoite surface protein 6 (MSP6)
PF3D7_0323400	SEED			Rh5 interacting protein (RIPR)
PF3D7_1335300	SEED			reticulocyte binding protein 2 homologue b (RH2b)
PF3D7_0930300	SEED			merozoite surface protein 1 (MSP1)
PF3D7_0424200	SEED			reticulocyte binding protein homologue 4 (RH4)
PF3D7_1335100	SEED			merozoite surface protein 7 (MSP7)
PF3D7_1452000	SEED			rhoptry neck protein 2 (RON2)
PF3D7_0817700	SEED			rhoptry neck protein 5 (RON5)
PF3D7_0708400	SEED			heat shock protein 90 (HSP90)
PF3D7_0828800	PREDICTED	0.006	0.00199234	GPI-anchored micronemal antigen (GAMA)
PF3D7_0911100	PREDICTED	0.009	0.00193589	conserved Plasmodium protein, unknown function
PF3D7_1143100	PREDICTED	0.019	0.00187932	transcription factor with AP2 domain(s) (AP2-O)
PF3D7_1136900	PREDICTED	0.013	0.00176649	subtilisin-like protease 2 (SUB2)
PF3D7_1125800	PREDICTED	0.019	0.00176356	kelch protein, putative
PF3D7_1252400	PREDICTED	0.005	0.00168604	reticulocyte binding protein homologue 3, pseudogene (RH3)
PF3D7_0302500	PREDICTED	0.003	0.00167744	cytoadherence linked asexual protein 3.1 (CLAG3.1)
PF3D7_0318700	PREDICTED	0.008	0.0016338	trophozoite stage antigen
PF3D7_1251200	PREDICTED	0.009	0.00160518	coronin
PF3D7_1036000	PREDICTED	0.009	0.0015691	merozoite surface protein (MSP11)
PF3D7_1337800	PREDICTED	0.013	0.00156541	calcium-dependent protein kinase 5 (CDPK5)
PF3D7_0414900	PREDICTED	0.004	0.00155405	armadillo-domain containing rhoptry protein (ARO)
PF3D7_1218000	PREDICTED	0.011	0.00154871	thrombospondin-related apical membrane protein (TRAMP)
PF3D7_0210600	PREDICTED	0.007	0.00154283	conserved Plasmodium protein, unknown function
PF3D7_1035300	PREDICTED	0.007	0.00153281	glutamate-rich protein (GLURP)
PF3D7_1423300	PREDICTED	0.006	0.00152899	serine/threonine protein phosphatase 7 (PP7)
PF3D7_0109000	PREDICTED	0.018	0.00151578	photosensitized INA-labeled protein PHIL1, putative (PHIL1)
PF3D7_1126700	PREDICTED	0.014	0.00151297	autophagy-related protein 23, putative (ATG23)
PF3D7_1351700	PREDICTED	0.005	0.00150895	inner membrane complex protein 1f, putative (IMC1f)
PF3D7_1014100	PREDICTED	0.012	0.00150508	conserved Plasmodium protein, unknown function
PF3D7_0507500	PREDICTED	0.001	0.0015047	subtilisin-like protease 1 (SUB1)
PF3D7_1310700	PREDICTED	0.008	0.00150078	RNA-binding protein, putative
PF3D7_0525800	PREDICTED	0.008	0.00149616	inner membrane complex protein 1g, putative (IMC1g)
PF3D7_1003600	PREDICTED	0.004	0.00149105	inner membrane complex protein 1c, putative (IMC1c)
PF3D7_1342600	PREDICTED	0.019	0.00148792	myosin A (MyoA)
PF3D7_0822900	PREDICTED	0.013	0.00147418	conserved Plasmodium protein, unknown function
PF3D7_1125700	PREDICTED	0.015	0.00144943	kelch protein, putative
PF3D7_1035900	PREDICTED	0.016	0.00144867	probable protein, unknown function (M566)
PF3D7_0818100	PREDICTED	0.008	0.00137387	zinc finger protein, putative
PF3D7_1455300	PREDICTED	0.012	0.00136443	conserved Plasmodium protein, unknown function
PF3D7_0808200	PREDICTED	0.024	0.00134713	plasmepsin X
PF3D7_0217500	PREDICTED	0.011	0.00133563	calcium-dependent protein kinase 1 (CDPK1)
PF3D7_1149200	PREDICTED	0.011	0.00132622	ring-infected erythrocyte surface antigen
PF3D7_0613900	PREDICTED	0.008	0.00131404	myosin E, putative (myoE)
PF3D7_0308300	PREDICTED	0.01	0.00130348	conserved Plasmodium protein, unknown function
PF3D7_0725400	PREDICTED	0.003	0.00129177	conserved Plasmodium protein, unknown function
PF3D7_1468400	PREDICTED	0.011	0.0012883	zinc finger protein, putative (D13)
PF3D7_1243700	PREDICTED	0.015	0.00128094	ubiquitin-conjugating enzyme E2, putative
PF3D7_0507400	PREDICTED	0.004	0.00126961	conserved Plasmodium protein, unknown function
PF3D7_1116100	PREDICTED	0.016	0.00126268	serine esterase, putative
PF3D7_1017500	PREDICTED	0.01	0.00126051	conserved Plasmodium protein, unknown function
PF3D7_1461400	PREDICTED	0.016	0.00124448	conserved Plasmodium protein, unknown function
PF3D7_1410400	PREDICTED	0.006	0.00124409	rhoptry-associated protein 1 (RAP1)
PF3D7_0423800	PREDICTED	0.006	0.00121541	cysteine-rich protective antigen (CyRPA)
PF3D7_0424300	PREDICTED	0.006	0.00121074	erythrocyte binding antigen-165, pseudogene (EBA165)
PF3D7_1026600	PREDICTED	0.01	0.00119434	conserved Plasmodium protein, unknown function
PF3D7_0304100	PREDICTED	0.008	0.00118852	inner membrane complex protein 1e, putative (IMC1e)
PF3D7_1332200	PREDICTED	0.015	0.00117823	conserved Plasmodium protein, unknown function
PF3D7_0206200	PREDICTED	0.007	0.0011748	pantothenate transporter (PAT)
PF3D7_0913800	PREDICTED	0.007	0.00116631	conserved Plasmodium protein, unknown function
PF3D7_0503600	PREDICTED	0.016	0.00115135	myosin B (MyoB)
PF3D7_1030200	PREDICTED	0.01	0.00115012	conserved Plasmodium protein, unknown function
PF3D7_0805200	PREDICTED	0.016	0.00114808	gamete release protein, putative (GAMER)
PF3D7_0919200	PREDICTED	0.018	0.0011366	PPPDE peptidase, putative
PF3D7_0515400	PREDICTED	0.01	0.00113313	conserved Plasmodium protein, unknown function
PF3D7_1222700	PREDICTED	0.007	0.00113103	glideosome-associated protein 45 (GAP45)
PF3D7_0403800	PREDICTED	0.011	0.00112745	alpha/beta hydrolase, putative
PF3D7_1036500	PREDICTED	0.004	0.0011194	probable protein, unknown function
PF3D7_1007300	PREDICTED	0.014	0.00109203	RING zinc finger protein, putative
PF3D7_1316200	PREDICTED	0.048	0.0010648	ADP-ribosylation factor, putative
PF3D7_0405900	PREDICTED	0.008	0.00104904	apical sushi protein (ASP)
PF3D7_0722200	PREDICTED	0.009	0.00103952	rhoptry-associated leucine zipper-like protein 1 (RALP1)
PF3D7_0408000	PREDICTED	0.005	0.00103864	conserved Plasmodium protein, unknown function
PF3D7_0918700	PREDICTED	0.02	0.00101727	conserved Plasmodium protein, unknown function
PF3D7_0613300	PREDICTED	0.009	0.00101246	rhoptry protein ROP14 (ROP14)
PF3D7_0316000	PREDICTED	0.006	0.000998231	microneme associated antigen (MA)
PF3D7_0419700	PREDICTED	0.014	0.000975742	apical merozoite protein (Pf34)
PF3D7_1307500	PREDICTED	0.006	0.000964798	conserved Plasmodium protein, unknown function
PF3D7_0919300	PREDICTED	0.019	0.000961594	thioredoxin-like protein 1, putative (TrxL1)
PF3D7_1204900	PREDICTED	0.011	0.000956118	probable protein, unknown function
PF3D7_0102200	PREDICTED	0.034	0.000954882	ring-infected erythrocyte surface antigen (RESA)
PF3D7_1246400	PREDICTED	0.009	0.000948268	myosin A tail domain interacting protein (MTIP)
PF3D7_0620400	PREDICTED	0.012	0.00090603	merozoite surface protein 10 (MSP10)
PF3D7_1361800	PREDICTED	0.017	0.000897284	conserved Plasmodium protein, unknown function
PF3D7_1031200	PREDICTED	0.012	0.00088034	MORN repeat-containing protein 1 (MORN1)
PF3D7_0501600	PREDICTED	0.023	0.000858595	rhoptry-associated protein 2 (RAP2)
PF3D7_1035700	PREDICTED	0.004	0.000840391	duffy binding-like merozoite surface protein (DBLMSP)
PF3D7_1238900	PREDICTED	0.012	0.000835418	protein kinase 2 (PK2)
PF3D7_0802600	PREDICTED	0.022	0.0008307	adenylyl cyclase beta (ACbeta)
PF3D7_1016000	PREDICTED	0.005	0.000828459	conserved Plasmodium protein, unknown function
PF3D7_0404700	PREDICTED	0.012	0.000823967	dipeptidyl aminopeptidase 3 (DPAP3)
PF3D7_0618000	PREDICTED	0.007	0.000822867	conserved Plasmodium membrane protein, unknown function
PF3D7_0817600	PREDICTED	0.015	0.000817326	conserved Plasmodium protein, unknown function
PF3D7_1009700	PREDICTED	0.013	0.000813956	tubulin--tyrosine ligase, putative
PF3D7_1472600	PREDICTED	0.028	0.000806397	protein disulfide-isomerase (PDI-14)
PF3D7_0805300	PREDICTED	0.01	0.000805518	conserved Plasmodium protein, unknown function
PF3D7_1035400	PREDICTED	0.019	0.000796117	merozoite surface protein 3 (MSP3)
PF3D7_0414800	PREDICTED	0.014	0.000762913	conserved Plasmodium protein, unknown function
PF3D7_0212600	PREDICTED	0.005	0.000746258	secreted protein with altered thrombospondin repeat domain (SPATR)
PF3D7_1344300	PREDICTED	0.038	0.000745587	conserved protein, unknown function
PF3D7_0831600	PREDICTED	0.036	0.00073852	cytoadherence linked asexual protein 8 (CLAG8)
PF3D7_0905400	PREDICTED	0.018	0.000727388	high molecular weight rhoptry protein 3 (RhopH3)
PF3D7_1436600	PREDICTED	0.004	0.000725442	cGMP-dependent protein kinase (PKG)
PF3D7_0407800	PREDICTED	0.008	0.000723081	conserved Plasmodium protein, unknown function
PF3D7_0528400	PREDICTED	0.006	0.000722654	palmitoyltransferase (DHHC7)
PF3D7_0501500	PREDICTED	0.02	0.000719382	rhoptry-associated protein 3 (RAP3)
PF3D7_1017100	PREDICTED	0.038	0.000711802	rhoptry neck protein 12 (RON12)
PF3D7_0506900	PREDICTED	0.023	0.000699147	rhomboid protease ROM4 (ROM4)
PF3D7_1412000	PREDICTED	0.023	0.000694576	p1/s1 nuclease, putative
PF3D7_0717500	PREDICTED	0.01	0.000693147	calcium-dependent protein kinase 4 (CDPK4)
PF3D7_0203200	PREDICTED	0.031	0.000653102	conserved Plasmodium protein, unknown function
PF3D7_1012200	PREDICTED	0.013	0.000647052	conserved Plasmodium protein, unknown function
PF3D7_0920700	PREDICTED	0.006	0.000641475	conserved Plasmodium protein, unknown function
PF3D7_1463900	PREDICTED	0.029	0.000639773	conserved Plasmodium membrane protein, unknown function
PF3D7_1323700	PREDICTED	0.049	0.000582523	glideosome associated protein with multiple membrane spans 1 (GAPM1)
PF3D7_1232500	PREDICTED	0.016	0.000582013	CG2-related protein, putative
PF3D7_0934800	PREDICTED	0.05	0.00056386	cAMP-dependent protein kinase catalytic subunit (PKAc)
PF3D7_1136200	PREDICTED	0.046	0.000537283	conserved Plasmodium protein, unknown function
PF3D7_1140400	PREDICTED	0.027	0.000529899	conserved Plasmodium protein, unknown function
PF3D7_0916000	PREDICTED	0.028	0.000507921	sugar transporter, putative
PF3D7_0302200	PREDICTED	0.008	0.000489616	cytoadherence linked asexual protein 3.2 (CLAG3.2)
PF3D7_0207100	PREDICTED	0.005	0.000484455	conserved Plasmodium protein, unknown function
PF3D7_1013800	PREDICTED	0.013	0.000473023	conserved Plasmodium protein, unknown function
PF3D7_0423500	PREDICTED	0.041	0.000465512	glideosome associated protein with multiple membrane spans 2 (GAPM2)
PF3D7_0707300	PREDICTED	0.049	0.000432813	rhoptry-associated membrane antigen (RAMA)
PF3D7_1409400	PREDICTED	0.045	0.000432364	conserved Plasmodium membrane protein, unknown function
PF3D7_0932000	PREDICTED	0.017	0.0004304	conserved Plasmodium protein, unknown function
PF3D7_1327300	PREDICTED	0.018	0.000416179	conserved Plasmodium protein, unknown function
PF3D7_1406800	PREDICTED	0.023	0.000410606	glideosome associated protein with multiple membrane spans 3 (GAPM3)
PF3D7_1236900	PREDICTED	0.036	0.000408756	conserved Plasmodium protein, unknown function
PF3D7_1401600	PREDICTED	0.024	0.000405363	Plasmodium exported protein (PHISTb), unknown function
PF3D7_1022700	PREDICTED	0.017	0.000398878	phospholipid scramblase, putative
PF3D7_0934600	PREDICTED	0.01	0.000398788	conserved Plasmodium protein, unknown function
PF3D7_0207000	PREDICTED	0.04	0.000375963	merozoite surface protein 4 (MSP4)
PF3D7_1146600	PREDICTED	0.03	0.000359684	CCAAT-box DNA binding protein subunit B (NFYB)
PF3D7_0528300	PREDICTED	0.025	0.000356655	conserved Plasmodium protein, unknown function
PF3D7_1310200	PREDICTED	0.033	0.0003554	conserved Plasmodium protein, unknown function
PF3D7_0420300	PREDICTED	0.05	0.000351959	transcription factor with AP2 domain(s) (ApiAP2)
PF3D7_0621100	PREDICTED	0.024	0.000345878	conserved Plasmodium protein, unknown function
PF3D7_0220800	PREDICTED	0.037	0.000326584	cytoadherence linked asexual protein 2 (CLAG2)
PF3D7_1029900	PREDICTED	0.05	0.000322546	conserved Plasmodium protein, unknown function
PF3D7_1231200	PREDICTED	0.013	0.000303768	conserved Plasmodium protein, unknown function
PF3D7_0207800	PREDICTED	0.046	0.000292667	serine repeat antigen 3 (SERA3)
PF3D7_1007200	PREDICTED	0.034	0.000290409	rhoGAP GTPase, putative
PF3D7_1459900	PREDICTED	0.047	0.000290259	conserved Plasmodium membrane protein, unknown function
PF3D7_1430200	PREDICTED	0.047	0.0002822	plasmepsin IX
PF3D7_1035600	PREDICTED	0.03	0.000269114	merozoite surface protein (H101)
PF3D7_0612700	PREDICTED	0.022	0.000263618	6-cysteine protein (P12)
PF3D7_0207700	PREDICTED	0.04	0.000243215	serine repeat antigen 4 (SERA4)
PF3D7_1027300	PREDICTED	0.026	0.00015318	peroxiredoxin (nPrx)
PF3D7_1334800	PREDICTED	0.024	0.000102656	MSP7-like protein (MSRP2)

## Sheet: LR
GeneID	Seed/Predicted	p-value	RWR Score	Description
PF3D7_0102500	SEED			erythrocyte binding antigen-181 (EBA181)
PF3D7_0424100	SEED			reticulocyte binding protein homologue 5 (RH5)
PF3D7_1133400	SEED			apical membrane antigen 1 (AMA1)
PF3D7_0731500	SEED			erythrocyte binding antigen-175 (EBA175)
PF3D7_1301600	SEED			erythrocyte binding antigen-140 (EBA140)
PF3D7_0402300	SEED			reticulocyte binding protein homologue 1 (RH1)
PF3D7_1028700	SEED			merozoite TRAP-like protein (MTRAP)
PF3D7_1035500	SEED			merozoite surface protein 6 (MSP6)
PF3D7_0323400	SEED			Rh5 interacting protein (RIPR)
PF3D7_0930300	SEED			merozoite surface protein 1 (MSP1)
PF3D7_1335100	SEED			merozoite surface protein 7 (MSP7)
PF3D7_1452000	SEED			rhoptry neck protein 2 (RON2)
PF3D7_0817700	SEED			rhoptry neck protein 5 (RON5)
PF3D7_0424200	SEED			reticulocyte binding protein homologue 4 (RH4)
PF3D7_0708400	SEED			heat shock protein 90 (HSP90)
PF3D7_0828800	PREDICTED	0.006	0.0020531	GPI-anchored micronemal antigen (GAMA)
PF3D7_0911100	PREDICTED	0.005	0.00199176	conserved Plasmodium protein, unknown function
PF3D7_1143100	PREDICTED	0.012	0.00194942	transcription factor with AP2 domain(s) (AP2-O)
PF3D7_1136900	PREDICTED	0.011	0.00179158	subtilisin-like protease 2 (SUB2)
PF3D7_1125800	PREDICTED	0.011	0.00176896	kelch protein, putative
PF3D7_0302500	PREDICTED	0.012	0.00175377	cytoadherence linked asexual protein 3.1 (CLAG3.1)
PF3D7_1252400	PREDICTED	0.014	0.00167108	reticulocyte binding protein homologue 3, pseudogene (RH3)
PF3D7_1251200	PREDICTED	0.016	0.00165614	coronin
PF3D7_1036000	PREDICTED	0.011	0.00162341	merozoite surface protein (MSP11)
PF3D7_0318700	PREDICTED	0.017	0.001623	trophozoite stage antigen
PF3D7_0525300	PREDICTED	0.008	0.00162101	conserved Plasmodium protein, unknown function
PF3D7_0414900	PREDICTED	0.008	0.00160674	armadillo-domain containing rhoptry protein (ARO)
PF3D7_1035300	PREDICTED	0.01	0.00160402	glutamate-rich protein (GLURP)
PF3D7_1218000	PREDICTED	0.005	0.00159284	thrombospondin-related apical membrane protein (TRAMP)
PF3D7_0210600	PREDICTED	0.005	0.00158392	conserved Plasmodium protein, unknown function
PF3D7_1423300	PREDICTED	0.005	0.00158352	serine/threonine protein phosphatase 7 (PP7)
PF3D7_1337800	PREDICTED	0.019	0.00156484	calcium-dependent protein kinase 5 (CDPK5)
PF3D7_1351700	PREDICTED	0.003	0.00155668	inner membrane complex protein 1f, putative (IMC1f)
PF3D7_1014100	PREDICTED	0.004	0.00155662	conserved Plasmodium protein, unknown function
PF3D7_1126700	PREDICTED	0.012	0.00155411	autophagy-related protein 23, putative (ATG23)
PF3D7_0109000	PREDICTED	0.019	0.00155362	photosensitized INA-labeled protein PHIL1, putative (PHIL1)
PF3D7_0507500	PREDICTED	0.01	0.00154713	subtilisin-like protease 1 (SUB1)
PF3D7_1310700	PREDICTED	0.011	0.00153487	RNA-binding protein, putative
PF3D7_0525800	PREDICTED	0.007	0.00153023	inner membrane complex protein 1g, putative (IMC1g)
PF3D7_1003600	PREDICTED	0.004	0.00152838	inner membrane complex protein 1c, putative (IMC1c)
PF3D7_0217500	PREDICTED	0.007	0.00152437	calcium-dependent protein kinase 1 (CDPK1)
PF3D7_0822900	PREDICTED	0.013	0.00152394	conserved Plasmodium protein, unknown function
PF3D7_1342600	PREDICTED	0.017	0.00152283	myosin A (MyoA)
PF3D7_1035900	PREDICTED	0.01	0.00150378	probable protein, unknown function (M566)
PF3D7_1125700	PREDICTED	0.005	0.00147551	kelch protein, putative
PF3D7_1116100	PREDICTED	0.008	0.00143646	serine esterase, putative
PF3D7_1410400	PREDICTED	0.012	0.00141599	rhoptry-associated protein 1 (RAP1)
PF3D7_1461400	PREDICTED	0.002	0.00141571	conserved Plasmodium protein, unknown function
PF3D7_1455300	PREDICTED	0.01	0.00137525	conserved Plasmodium protein, unknown function
PF3D7_0818100	PREDICTED	0.005	0.00137127	zinc finger protein, putative
PF3D7_0423800	PREDICTED	0.003	0.00136703	cysteine-rich protective antigen (CyRPA)
PF3D7_0808200	PREDICTED	0.028	0.00134657	plasmepsin X
PF3D7_1149200	PREDICTED	0.008	0.00130874	ring-infected erythrocyte surface antigen
PF3D7_0308300	PREDICTED	0.013	0.00130802	conserved Plasmodium protein, unknown function
PF3D7_1243700	PREDICTED	0.012	0.0013077	ubiquitin-conjugating enzyme E2, putative
PF3D7_0725400	PREDICTED	0.006	0.00130026	conserved Plasmodium protein, unknown function
PF3D7_1222700	PREDICTED	0.011	0.0012937	glideosome-associated protein 45 (GAP45)
PF3D7_0507400	PREDICTED	0.007	0.0012771	conserved Plasmodium protein, unknown function
PF3D7_1017500	PREDICTED	0.02	0.00123753	conserved Plasmodium protein, unknown function
PF3D7_0405900	PREDICTED	0.012	0.0012039	apical sushi protein (ASP)
PF3D7_0304100	PREDICTED	0.006	0.00119513	inner membrane complex protein 1e, putative (IMC1e)
PF3D7_0722200	PREDICTED	0.014	0.00119319	rhoptry-associated leucine zipper-like protein 1 (RALP1)
PF3D7_0206200	PREDICTED	0.005	0.00117617	pantothenate transporter (PAT)
PF3D7_1332200	PREDICTED	0.014	0.00116705	conserved Plasmodium protein, unknown function
PF3D7_0913800	PREDICTED	0.005	0.00115712	conserved Plasmodium protein, unknown function
PF3D7_1026600	PREDICTED	0.007	0.00115388	conserved Plasmodium protein, unknown function
PF3D7_1030200	PREDICTED	0.023	0.00113939	conserved Plasmodium protein, unknown function
PF3D7_0503600	PREDICTED	0.01	0.00112748	myosin B (MyoB)
PF3D7_0805200	PREDICTED	0.018	0.00112723	gamete release protein, putative (GAMER)
PF3D7_0403800	PREDICTED	0.005	0.00112362	alpha/beta hydrolase, putative
PF3D7_0919200	PREDICTED	0.01	0.00111295	PPPDE peptidase, putative
PF3D7_1036500	PREDICTED	0.01	0.00108708	probable protein, unknown function
PF3D7_1204900	PREDICTED	0.019	0.00105872	probable protein, unknown function
PF3D7_1037500	PREDICTED	0.032	0.00104731	dynamin-like protein (DYN2)
PF3D7_1316200	PREDICTED	0.042	0.00104186	ADP-ribosylation factor, putative
PF3D7_1361800	PREDICTED	0.021	0.00103094	conserved Plasmodium protein, unknown function
PF3D7_1031200	PREDICTED	0.006	0.00101403	MORN repeat-containing protein 1 (MORN1)
PF3D7_0408000	PREDICTED	0.007	0.00100482	conserved Plasmodium protein, unknown function
PF3D7_0419700	PREDICTED	0.007	0.000990431	apical merozoite protein (Pf34)
PF3D7_0501600	PREDICTED	0.007	0.000986856	rhoptry-associated protein 2 (RAP2)
PF3D7_0918700	PREDICTED	0.026	0.000977236	conserved Plasmodium protein, unknown function
PF3D7_1035700	PREDICTED	0.017	0.000971726	duffy binding-like merozoite surface protein (DBLMSP)
PF3D7_0316000	PREDICTED	0.008	0.000965159	microneme associated antigen (MA)
PF3D7_0404700	PREDICTED	0.011	0.000953102	dipeptidyl aminopeptidase 3 (DPAP3)
PF3D7_0618000	PREDICTED	0.005	0.000947456	conserved Plasmodium membrane protein, unknown function
PF3D7_0817600	PREDICTED	0.025	0.00094229	conserved Plasmodium protein, unknown function
PF3D7_1009700	PREDICTED	0.008	0.000937229	tubulin--tyrosine ligase, putative
PF3D7_0102200	PREDICTED	0.041	0.000937074	ring-infected erythrocyte surface antigen (RESA)
PF3D7_1246400	PREDICTED	0.007	0.0009354	myosin A tail domain interacting protein (MTIP)
PF3D7_1307500	PREDICTED	0.005	0.000934922	conserved Plasmodium protein, unknown function
PF3D7_1472600	PREDICTED	0.029	0.000933359	protein disulfide-isomerase (PDI-14)
PF3D7_0507300	PREDICTED	0.014	0.000931058	conserved Plasmodium protein, unknown function
PF3D7_0919300	PREDICTED	0.016	0.000924967	thioredoxin-like protein 1, putative (TrxL1)
PF3D7_1238900	PREDICTED	0.014	0.000919596	protein kinase 2 (PK2)
PF3D7_0620400	PREDICTED	0.007	0.000904178	merozoite surface protein 10 (MSP10)
PF3D7_1035400	PREDICTED	0.017	0.00089857	merozoite surface protein 3 (MSP3)
PF3D7_0810300	PREDICTED	0.048	0.00089106	protein phosphatase PPM5, putative (PPM5)
PF3D7_1344300	PREDICTED	0.031	0.000861439	conserved protein, unknown function
PF3D7_0831600	PREDICTED	0.01	0.00085553	cytoadherence linked asexual protein 8 (CLAG8)
PF3D7_0905400	PREDICTED	0.005	0.000846819	high molecular weight rhoptry protein 3 (RhopH3)
PF3D7_1436600	PREDICTED	0.012	0.000843853	cGMP-dependent protein kinase (PKG)
PF3D7_0407800	PREDICTED	0.006	0.000838144	conserved Plasmodium protein, unknown function
PF3D7_0528400	PREDICTED	0.01	0.000837553	palmitoyltransferase (DHHC7)
PF3D7_1017100	PREDICTED	0.021	0.000832576	rhoptry neck protein 12 (RON12)
PF3D7_0501500	PREDICTED	0.004	0.000831569	rhoptry-associated protein 3 (RAP3)
PF3D7_0802600	PREDICTED	0.038	0.000830166	adenylyl cyclase beta (ACbeta)
PF3D7_0506900	PREDICTED	0.002	0.000817687	rhomboid protease ROM4 (ROM4)
PF3D7_0212600	PREDICTED	0.005	0.000814522	secreted protein with altered thrombospondin repeat domain (SPATR)
PF3D7_0206800	PREDICTED	0.011	0.000809417	merozoite surface protein 2 (MSP2)
PF3D7_0717500	PREDICTED	0.005	0.000804133	calcium-dependent protein kinase 4 (CDPK4)
PF3D7_1412000	PREDICTED	0.024	0.000803181	p1/s1 nuclease, putative
PF3D7_1016000	PREDICTED	0.006	0.000792731	conserved Plasmodium protein, unknown function
PF3D7_0805300	PREDICTED	0.006	0.000755983	conserved Plasmodium protein, unknown function
PF3D7_1463900	PREDICTED	0.019	0.000753495	conserved Plasmodium membrane protein, unknown function
PF3D7_1012200	PREDICTED	0.008	0.000749811	conserved Plasmodium protein, unknown function
PF3D7_0920700	PREDICTED	0.006	0.000742088	conserved Plasmodium protein, unknown function
PF3D7_0929400	PREDICTED	0.03	0.000723199	high molecular weight rhoptry protein 2 (RhopH2)
PF3D7_1232500	PREDICTED	0.017	0.000686291	CG2-related protein, putative
PF3D7_1323700	PREDICTED	0.027	0.00068514	glideosome associated protein with multiple membrane spans 1 (GAPM1)
PF3D7_0934800	PREDICTED	0.029	0.00066191	cAMP-dependent protein kinase catalytic subunit (PKAc)
PF3D7_1136200	PREDICTED	0.044	0.000629761	conserved Plasmodium protein, unknown function
PF3D7_1140400	PREDICTED	0.02	0.000627604	conserved Plasmodium protein, unknown function
PF3D7_0916000	PREDICTED	0.037	0.000601795	sugar transporter, putative
PF3D7_0207600	PREDICTED	0.036	0.000593132	serine repeat antigen 5 (SERA5)
PF3D7_1228600	PREDICTED	0.049	0.000586938	merozoite surface protein 9 (MSP9)
PF3D7_0302200	PREDICTED	0.008	0.000586472	cytoadherence linked asexual protein 3.2 (CLAG3.2)
PF3D7_1439500	PREDICTED	0.03	0.000581785	CCAAT-binding transcription factor, putative
PF3D7_0203200	PREDICTED	0.041	0.000580995	conserved Plasmodium protein, unknown function
PF3D7_1013800	PREDICTED	0.013	0.000561913	conserved Plasmodium protein, unknown function
PF3D7_0423500	PREDICTED	0.04	0.000558978	glideosome associated protein with multiple membrane spans 2 (GAPM2)
PF3D7_0207100	PREDICTED	0.009	0.000552446	conserved Plasmodium protein, unknown function
PF3D7_1409400	PREDICTED	0.03	0.000524163	conserved Plasmodium membrane protein, unknown function
PF3D7_0707300	PREDICTED	0.026	0.000521028	rhoptry-associated membrane antigen (RAMA)
PF3D7_1406800	PREDICTED	0.019	0.000496875	glideosome associated protein with multiple membrane spans 3 (GAPM3)
PF3D7_0932000	PREDICTED	0.021	0.000478207	conserved Plasmodium protein, unknown function
PF3D7_1022700	PREDICTED	0.013	0.000462405	phospholipid scramblase, putative
PF3D7_1327300	PREDICTED	0.016	0.000460897	conserved Plasmodium protein, unknown function
PF3D7_1401600	PREDICTED	0.028	0.000455656	Plasmodium exported protein (PHISTb), unknown function
PF3D7_0207000	PREDICTED	0.016	0.000442608	merozoite surface protein 4 (MSP4)
PF3D7_0934600	PREDICTED	0.012	0.000435916	conserved Plasmodium protein, unknown function
PF3D7_1146600	PREDICTED	0.027	0.000435369	CCAAT-box DNA binding protein subunit B (NFYB)
PF3D7_1310200	PREDICTED	0.016	0.0004227	conserved Plasmodium protein, unknown function
PF3D7_0621100	PREDICTED	0.024	0.000419623	conserved Plasmodium protein, unknown function
PF3D7_1035100	PREDICTED	0.046	0.00041728	probable protein, unknown function
PF3D7_1308000	PREDICTED	0.026	0.000414522	conserved Plasmodium membrane protein, unknown function
PF3D7_0528300	PREDICTED	0.024	0.00041045	conserved Plasmodium protein, unknown function
PF3D7_1128900	PREDICTED	0.028	0.000409373	conserved Plasmodium protein, unknown function
PF3D7_1318700	PREDICTED	0.035	0.00040691	conserved Plasmodium protein, unknown function
PF3D7_0507200	PREDICTED	0.046	0.000405923	subtilisin-like protease 3 (SUB3)
PF3D7_0220800	PREDICTED	0.016	0.000404273	cytoadherence linked asexual protein 2 (CLAG2)
PF3D7_0420300	PREDICTED	0.046	0.000393449	transcription factor with AP2 domain(s) (ApiAP2)
PF3D7_0803500	PREDICTED	0.05	0.0003927	AAA family ATPase, putative
PF3D7_0105400.2	PREDICTED	0.037	0.000388085	conserved Plasmodium protein, unknown function
PF3D7_0508000	PREDICTED	0.033	0.000386663	6-cysteine protein (P38)
PF3D7_0207800	PREDICTED	0.022	0.000363138	serine repeat antigen 3 (SERA3)
PF3D7_0404000	PREDICTED	0.018	0.000351288	conserved Plasmodium protein, unknown function
PF3D7_1430200	PREDICTED	0.05	0.000345854	plasmepsin IX
PF3D7_1459900	PREDICTED	0.028	0.000338396	conserved Plasmodium membrane protein, unknown function
PF3D7_0612700	PREDICTED	0.016	0.000330636	6-cysteine protein (P12)
PF3D7_1345600	PREDICTED	0.046	0.000318985	inner membrane complex protein
PF3D7_1031400.2	PREDICTED	0.048	0.000276263	OTU-like cysteine protease, putative
PF3D7_0905500	PREDICTED	0.027	0.000272343	conserved Plasmodium protein, unknown function
PF3D7_1313500	PREDICTED	0.026	0.000252131	conserved Plasmodium membrane protein, unknown function
PF3D7_0405200	PREDICTED	0.024	0.000227054	ag-1 blood stage membrane protein homologue (MAg-1)
PF3D7_0404900	PREDICTED	0.05	0.00021579	6-cysteine protein (P41)
PF3D7_0609800	PREDICTED	0.031	0.000191407	palmitoyltransferase, putative (DHHC2)
PF3D7_1117400	PREDICTED	0.042	0.000189606	conserved Plasmodium protein, unknown function
PF3D7_1027300	PREDICTED	0.021	0.000188224	peroxiredoxin (nPrx)
PF3D7_1318000	PREDICTED	0.03	0.000166321	conserved Plasmodium membrane protein, unknown function
PF3D7_1334800	PREDICTED	0.007	0.000114368	MSP7-like protein (MSRP2)
PF3D7_1434200	PREDICTED	0.041	0.000106143	calmodulin (CAM)

## Sheet: ET
GeneID	Seed/Predicted	p-value	RWR Score	Description
PF3D7_1133400	SEED			apical membrane antigen 1 (AMA1)
PF3D7_0102500	SEED			erythrocyte binding antigen-181 (EBA181)
PF3D7_1028700	SEED			merozoite TRAP-like protein (MTRAP)
PF3D7_0930300	SEED			merozoite surface protein 1 (MSP1)
PF3D7_1335100	SEED			merozoite surface protein 7 (MSP7)
PF3D7_0731500	SEED			erythrocyte binding antigen-175 (EBA175)
PF3D7_1301600	SEED			erythrocyte binding antigen-140 (EBA140)
PF3D7_1035500	SEED			merozoite surface protein 6 (MSP6)
PF3D7_0817700	SEED			rhoptry neck protein 5 (RON5)
PF3D7_0708400	SEED			heat shock protein 90 (HSP90)
PF3D7_1251200	PREDICTED	0.004	0.00311762	coronin
PF3D7_0414900	PREDICTED	0.004	0.00305214	armadillo-domain containing rhoptry protein (ARO)
PF3D7_1035300	PREDICTED	0.011	0.00299203	glutamate-rich protein (GLURP)
PF3D7_0210600	PREDICTED	0.006	0.00298887	conserved Plasmodium protein, unknown function
PF3D7_0109000	PREDICTED	0.007	0.00293115	photosensitized INA-labeled protein PHIL1, putative (PHIL1)
PF3D7_0507500	PREDICTED	0.008	0.00292417	subtilisin-like protease 1 (SUB1)
PF3D7_0217500	PREDICTED	0.005	0.00292132	calcium-dependent protein kinase 1 (CDPK1)
PF3D7_1003600	PREDICTED	0.005	0.00290654	inner membrane complex protein 1c, putative (IMC1c)
PF3D7_0525800	PREDICTED	0.006	0.00289744	inner membrane complex protein 1g, putative (IMC1g)
PF3D7_1342600	PREDICTED	0.016	0.0028956	myosin A (MyoA)
PF3D7_1310700	PREDICTED	0.002	0.00288118	RNA-binding protein, putative
PF3D7_1410400	PREDICTED	0.006	0.00270868	rhoptry-associated protein 1 (RAP1)
PF3D7_0302500	PREDICTED	0.007	0.00269428	cytoadherence linked asexual protein 3.1 (CLAG3.1)
PF3D7_1455300	PREDICTED	0.003	0.00267136	conserved Plasmodium protein, unknown function
PF3D7_1222700	PREDICTED	0.005	0.00263023	glideosome-associated protein 45 (GAP45)
PF3D7_1125800	PREDICTED	0.007	0.00255273	kelch protein, putative
PF3D7_1017500	PREDICTED	0.005	0.00238254	conserved Plasmodium protein, unknown function
PF3D7_0725400	PREDICTED	0.002	0.0023692	conserved Plasmodium protein, unknown function
PF3D7_1243700	PREDICTED	0.01	0.0022914	ubiquitin-conjugating enzyme E2, putative
PF3D7_0318700	PREDICTED	0.011	0.00226742	trophozoite stage antigen
PF3D7_1218000	PREDICTED	0.013	0.0022658	thrombospondin-related apical membrane protein (TRAMP)
PF3D7_1030200	PREDICTED	0.007	0.0022279	conserved Plasmodium protein, unknown function
PF3D7_0913800	PREDICTED	0.004	0.00217279	conserved Plasmodium protein, unknown function
PF3D7_0805200	PREDICTED	0.014	0.00213733	gamete release protein, putative (GAMER)
PF3D7_0919200	PREDICTED	0.012	0.00210517	PPPDE peptidase, putative
PF3D7_0102200	PREDICTED	0.009	0.00199012	ring-infected erythrocyte surface antigen (RESA)
PF3D7_1116100	PREDICTED	0.018	0.00198903	serine esterase, putative
PF3D7_0206200	PREDICTED	0.007	0.00197718	pantothenate transporter (PAT)
PF3D7_1246400	PREDICTED	0.013	0.00194303	myosin A tail domain interacting protein (MTIP)
PF3D7_1332200	PREDICTED	0.01	0.00192164	conserved Plasmodium protein, unknown function
PF3D7_1031200	PREDICTED	0.006	0.00191686	MORN repeat-containing protein 1 (MORN1)
PF3D7_0501600	PREDICTED	0.005	0.00172643	rhoptry-associated protein 2 (RAP2)
PF3D7_0212600	PREDICTED	0.003	0.00168107	secreted protein with altered thrombospondin repeat domain (SPATR)
PF3D7_1361800	PREDICTED	0.014	0.00166904	conserved Plasmodium protein, unknown function
PF3D7_1149200	PREDICTED	0.006	0.00154614	ring-infected erythrocyte surface antigen
PF3D7_0506900	PREDICTED	0.01	0.00144953	rhomboid protease ROM4 (ROM4)
PF3D7_1323700	PREDICTED	0.009	0.00143384	glideosome associated protein with multiple membrane spans 1 (GAPM1)
PF3D7_1223100	PREDICTED	0.017	0.00140814	cAMP-dependent protein kinase regulatory subunit (PKAr)
PF3D7_0905400	PREDICTED	0.008	0.00139686	high molecular weight rhoptry protein 3 (RhopH3)
PF3D7_0515700	PREDICTED	0.022	0.00138517	glideosome-associated protein 40, putative (GAP40)
PF3D7_0407800	PREDICTED	0.007	0.00138104	conserved Plasmodium protein, unknown function
PF3D7_1232500	PREDICTED	0.011	0.0013803	CG2-related protein, putative
PF3D7_0934800	PREDICTED	0.003	0.0013683	cAMP-dependent protein kinase catalytic subunit (PKAc)
PF3D7_0810300	PREDICTED	0.033	0.00131932	protein phosphatase PPM5, putative (PPM5)
PF3D7_0929400	PREDICTED	0.013	0.00131466	high molecular weight rhoptry protein 2 (RhopH2)
PF3D7_0717500	PREDICTED	0.006	0.00129497	calcium-dependent protein kinase 4 (CDPK4)
PF3D7_1140400	PREDICTED	0.007	0.00127625	conserved Plasmodium protein, unknown function
PF3D7_0207600	PREDICTED	0.018	0.00126079	serine repeat antigen 5 (SERA5)
PF3D7_1344300	PREDICTED	0.028	0.00124232	conserved protein, unknown function
PF3D7_1228600	PREDICTED	0.018	0.00119179	merozoite surface protein 9 (MSP9)
PF3D7_1246200	PREDICTED	0.015	0.00115886	actin I (ACT1)
PF3D7_1013800	PREDICTED	0.006	0.00113463	conserved Plasmodium protein, unknown function
PF3D7_0423500	PREDICTED	0.024	0.00113203	glideosome associated protein with multiple membrane spans 2 (GAPM2)
PF3D7_0802600	PREDICTED	0.036	0.00107435	adenylyl cyclase beta (ACbeta)
PF3D7_1409400	PREDICTED	0.014	0.00102342	conserved Plasmodium membrane protein, unknown function
PF3D7_0302200	PREDICTED	0.007	0.00100408	cytoadherence linked asexual protein 3.2 (CLAG3.2)
PF3D7_1406800	PREDICTED	0.011	0.000975526	glideosome associated protein with multiple membrane spans 3 (GAPM3)
PF3D7_0932000	PREDICTED	0.02	0.000974375	conserved Plasmodium protein, unknown function
PF3D7_0918000	PREDICTED	0.048	0.000966757	glideosome-associated protein 50 (GAP50)
PF3D7_1035100	PREDICTED	0.036	0.000736857	probable protein, unknown function
PF3D7_0507200	PREDICTED	0.04	0.000726826	subtilisin-like protease 3 (SUB3)
PF3D7_1025400	PREDICTED	0.035	0.000722136	conserved Plasmodium membrane protein, unknown function
PF3D7_0522600	PREDICTED	0.033	0.000657586	inner membrane complex protein
PF3D7_0207800	PREDICTED	0.016	0.000654931	serine repeat antigen 3 (SERA3)
PF3D7_1430200	PREDICTED	0.029	0.000647451	plasmepsin IX
PF3D7_1007200	PREDICTED	0.023	0.000638463	rhoGAP GTPase, putative
PF3D7_0932200	PREDICTED	0.031	0.000630929	profilin, putative (PFN)
PF3D7_0612700	PREDICTED	0.008	0.00062135	6-cysteine protein (P12)
PF3D7_1022700	PREDICTED	0.019	0.000620533	phospholipid scramblase, putative
PF3D7_1235200	PREDICTED	0.04	0.000527913	V-type K+-independent H+-translocating inorganic pyrophosphatase (VP2)
PF3D7_1345600	PREDICTED	0.02	0.000515909	inner membrane complex protein
PF3D7_0404900	PREDICTED	0.024	0.00049033	6-cysteine protein (P41)
PF3D7_0503400	PREDICTED	0.019	0.000490235	actin-depolymerizing factor 1 (ADF1)
PF3D7_0905500	PREDICTED	0.012	0.000443308	conserved Plasmodium protein, unknown function
PF3D7_1132800	PREDICTED	0.029	0.000431331	aquaglyceroporin (AQP)
PF3D7_1224100	PREDICTED	0.043	0.000424689	conserved Plasmodium protein, unknown function
PF3D7_1334800	PREDICTED	0.013	0.000327755	MSP7-like protein (MSRP2)
PF3D7_0704800	PREDICTED	0.048	0.000241493	conserved Plasmodium protein, unknown function
PF3D7_1361400	PREDICTED	0.033	0.000202611	actin-depolymerizing factor 2 (ADF2)
PF3D7_1413900	PREDICTED	0.047	0.000148645	DnaJ protein, putative
PF3D7_1304500	PREDICTED	0.046	0.000140546	small heat shock protein, putative
PF3D7_1241900	PREDICTED	0.018	0.000139146	tetratricopeptide repeat protein, putative
PF3D7_1334200	PREDICTED	0.015	0.00013889	chaperone binding protein, putative
PF3D7_0629200	PREDICTED	0.04	0.00013523	DnaJ protein, putative
PF3D7_1002800	PREDICTED	0.034	0.000124745	DnaJ protein, putative
PF3D7_0823800	PREDICTED	0.025	0.000124088	DnaJ protein, putative

## Sheet: LT
GeneID	Seed/Predicted	p-value	RWR Score	Description
PF3D7_1133400	SEED			apical membrane antigen 1 (AMA1)
PF3D7_1028700	SEED			merozoite TRAP-like protein (MTRAP)
PF3D7_0731500	SEED			erythrocyte binding antigen-175 (EBA175)
PF3D7_1035500	SEED			merozoite surface protein 6 (MSP6)
PF3D7_1301600	SEED			erythrocyte binding antigen-140 (EBA140)
PF3D7_0930300	SEED			merozoite surface protein 1 (MSP1)
PF3D7_1335100	SEED			merozoite surface protein 7 (MSP7)
PF3D7_1452000	SEED			rhoptry neck protein 2 (RON2)
PF3D7_0817700	SEED			rhoptry neck protein 5 (RON5)
PF3D7_1335300	SEED			reticulocyte binding protein 2 homologue b (RH2b)
PF3D7_0708400	SEED			heat shock protein 90 (HSP90)
PF3D7_1251200	PREDICTED	0.009	0.00231311	coronin
PF3D7_1036000	PREDICTED	0.007	0.00228751	merozoite surface protein (MSP11)
PF3D7_0414900	PREDICTED	0.002	0.00225105	armadillo-domain containing rhoptry protein (ARO)
PF3D7_0210600	PREDICTED	0.006	0.00222163	conserved Plasmodium protein, unknown function
PF3D7_0109000	PREDICTED	0.013	0.00218591	photosensitized INA-labeled protein PHIL1, putative (PHIL1)
PF3D7_0507500	PREDICTED	0.005	0.0021798	subtilisin-like protease 1 (SUB1)
PF3D7_1351700	PREDICTED	0.008	0.00216981	inner membrane complex protein 1f, putative (IMC1f)
PF3D7_0525800	PREDICTED	0.007	0.00216539	inner membrane complex protein 1g, putative (IMC1g)
PF3D7_1310700	PREDICTED	0.007	0.00215529	RNA-binding protein, putative
PF3D7_1342600	PREDICTED	0.01	0.00214586	myosin A (MyoA)
PF3D7_1003600	PREDICTED	0.006	0.00214448	inner membrane complex protein 1c, putative (IMC1c)
PF3D7_1125700	PREDICTED	0.009	0.00205195	kelch protein, putative
PF3D7_0302500	PREDICTED	0.006	0.00204167	cytoadherence linked asexual protein 3.1 (CLAG3.1)
PF3D7_1104900	PREDICTED	0.013	0.00197096	calcium/calmodulin-dependent protein kinase, putative
PF3D7_0818100	PREDICTED	0.004	0.0019212	zinc finger protein, putative
PF3D7_1455300	PREDICTED	0.007	0.00191451	conserved Plasmodium protein, unknown function
PF3D7_0214600	PREDICTED	0.008	0.00188062	serine/threonine protein kinase, putative
PF3D7_1125800	PREDICTED	0.003	0.00185903	kelch protein, putative
PF3D7_0217500	PREDICTED	0.005	0.00184998	calcium-dependent protein kinase 1 (CDPK1)
PF3D7_0613900	PREDICTED	0.011	0.00182568	myosin E, putative (myoE)
PF3D7_0725400	PREDICTED	0.008	0.00181366	conserved Plasmodium protein, unknown function
PF3D7_1017500	PREDICTED	0.001	0.00175944	conserved Plasmodium protein, unknown function
PF3D7_1243700	PREDICTED	0.007	0.00173979	ubiquitin-conjugating enzyme E2, putative
PF3D7_1218000	PREDICTED	0.013	0.00173228	thrombospondin-related apical membrane protein (TRAMP)
PF3D7_1410400	PREDICTED	0.004	0.00173226	rhoptry-associated protein 1 (RAP1)
PF3D7_0418600	PREDICTED	0.014	0.00169462	regulator of chromosome condensation, putative
PF3D7_0525300	PREDICTED	0.015	0.00169333	conserved Plasmodium protein, unknown function
PF3D7_1222700	PREDICTED	0.006	0.00166625	glideosome-associated protein 45 (GAP45)
PF3D7_1461400	PREDICTED	0.006	0.00166094	conserved Plasmodium protein, unknown function
PF3D7_1030200	PREDICTED	0.005	0.00164473	conserved Plasmodium protein, unknown function
PF3D7_0913800	PREDICTED	0.004	0.00158841	conserved Plasmodium protein, unknown function
PF3D7_0805200	PREDICTED	0.006	0.00158439	gamete release protein, putative (GAMER)
PF3D7_0304100	PREDICTED	0.004	0.00158203	inner membrane complex protein 1e, putative (IMC1e)
PF3D7_0423800	PREDICTED	0.006	0.0015604	cysteine-rich protective antigen (CyRPA)
PF3D7_0919200	PREDICTED	0.008	0.001559	PPPDE peptidase, putative
PF3D7_0206200	PREDICTED	0.007	0.00154653	pantothenate transporter (PAT)
PF3D7_0102200	PREDICTED	0.019	0.00146285	ring-infected erythrocyte surface antigen (RESA)
PF3D7_0403800	PREDICTED	0.012	0.00144436	alpha/beta hydrolase, putative
PF3D7_1316200	PREDICTED	0.017	0.00143689	ADP-ribosylation factor, putative
PF3D7_1035400	PREDICTED	0.013	0.0014365	merozoite surface protein 3 (MSP3)
PF3D7_1116100	PREDICTED	0.016	0.00142573	serine esterase, putative
PF3D7_1246400	PREDICTED	0.019	0.0014196	myosin A tail domain interacting protein (MTIP)
PF3D7_0419700	PREDICTED	0.001	0.00139855	apical merozoite protein (Pf34)
PF3D7_0214900	PREDICTED	0.009	0.00136723	rhoptry neck protein 6 (RON6)
PF3D7_0722200	PREDICTED	0.005	0.00125323	rhoptry-associated leucine zipper-like protein 1 (RALP1)
PF3D7_1035700	PREDICTED	0.005	0.0012456	duffy binding-like merozoite surface protein (DBLMSP)
PF3D7_0919300	PREDICTED	0.014	0.00123201	thioredoxin-like protein 1, putative (TrxL1)
PF3D7_1031200	PREDICTED	0.013	0.00116915	MORN repeat-containing protein 1 (MORN1)
PF3D7_1017100	PREDICTED	0.022	0.00115904	rhoptry neck protein 12 (RON12)
PF3D7_1204900	PREDICTED	0.002	0.00114294	probable protein, unknown function
PF3D7_0802600	PREDICTED	0.019	0.00108028	adenylyl cyclase beta (ACbeta)
PF3D7_0501600	PREDICTED	0.002	0.00104069	rhoptry-associated protein 2 (RAP2)
PF3D7_0831600	PREDICTED	0.018	0.00102979	cytoadherence linked asexual protein 8 (CLAG8)
PF3D7_0423300	PREDICTED	0.007	0.00102826	conserved Plasmodium protein, unknown function
PF3D7_1323700	PREDICTED	0.012	0.000998717	glideosome associated protein with multiple membrane spans 1 (GAPM1)
PF3D7_1361800	PREDICTED	0.024	0.000998541	conserved Plasmodium protein, unknown function
PF3D7_1472600	PREDICTED	0.023	0.000998361	protein disulfide-isomerase (PDI-14)
PF3D7_0905400	PREDICTED	0.006	0.000992493	high molecular weight rhoptry protein 3 (RhopH3)
PF3D7_1232500	PREDICTED	0.01	0.000990255	CG2-related protein, putative
PF3D7_1223100	PREDICTED	0.024	0.000986215	cAMP-dependent protein kinase regulatory subunit (PKAr)
PF3D7_0407800	PREDICTED	0.002	0.000982894	conserved Plasmodium protein, unknown function
PF3D7_1436600	PREDICTED	0.009	0.000977184	cGMP-dependent protein kinase (PKG)
PF3D7_0515700	PREDICTED	0.023	0.000970216	glideosome-associated protein 40, putative (GAP40)
PF3D7_0934800	PREDICTED	0.012	0.000968956	cAMP-dependent protein kinase catalytic subunit (PKAc)
PF3D7_0929400	PREDICTED	0.02	0.000937366	high molecular weight rhoptry protein 2 (RhopH2)
PF3D7_0810300	PREDICTED	0.032	0.000930739	protein phosphatase PPM5, putative (PPM5)
PF3D7_0207600	PREDICTED	0.013	0.000916644	serine repeat antigen 5 (SERA5)
PF3D7_0717500	PREDICTED	0.006	0.000909419	calcium-dependent protein kinase 4 (CDPK4)
PF3D7_1140400	PREDICTED	0.014	0.000900688	conserved Plasmodium protein, unknown function
PF3D7_1469200	PREDICTED	0.042	0.000878779	shewanella-like protein phosphatase 1, putative (SHLP1)
PF3D7_0506900	PREDICTED	0.026	0.000872444	rhomboid protease ROM4 (ROM4)
PF3D7_1228600	PREDICTED	0.021	0.000868432	merozoite surface protein 9 (MSP9)
PF3D7_1246200	PREDICTED	0.025	0.000836494	actin I (ACT1)
PF3D7_0628100	PREDICTED	0.012	0.000829163	HECT-domain (ubiquitin-transferase), putative
PF3D7_1013800	PREDICTED	0.009	0.000826189	conserved Plasmodium protein, unknown function
PF3D7_0528400	PREDICTED	0.012	0.000823804	palmitoyltransferase (DHHC7)
PF3D7_1012200	PREDICTED	0.005	0.000816926	conserved Plasmodium protein, unknown function
PF3D7_0501500	PREDICTED	0.012	0.000814292	rhoptry-associated protein 3 (RAP3)
PF3D7_1009700	PREDICTED	0.004	0.000807714	tubulin--tyrosine ligase, putative
PF3D7_0423500	PREDICTED	0.02	0.000797456	glideosome associated protein with multiple membrane spans 2 (GAPM2)
PF3D7_1136200	PREDICTED	0.033	0.000756191	conserved Plasmodium protein, unknown function
PF3D7_0916000	PREDICTED	0.025	0.00073681	sugar transporter, putative
PF3D7_1409400	PREDICTED	0.014	0.000731874	conserved Plasmodium membrane protein, unknown function
PF3D7_0302200	PREDICTED	0.005	0.000715429	cytoadherence linked asexual protein 3.2 (CLAG3.2)
PF3D7_1344300	PREDICTED	0.029	0.000705306	conserved protein, unknown function
PF3D7_1236900	PREDICTED	0.019	0.000701422	conserved Plasmodium protein, unknown function
PF3D7_1406800	PREDICTED	0.01	0.000696348	glideosome associated protein with multiple membrane spans 3 (GAPM3)
PF3D7_0932000	PREDICTED	0.021	0.000657305	conserved Plasmodium protein, unknown function
PF3D7_0723300	PREDICTED	0.018	0.000651313	conserved Plasmodium protein, unknown function
PF3D7_0105400.2	PREDICTED	0.014	0.000588261	conserved Plasmodium protein, unknown function
PF3D7_1437300	PREDICTED	0.046	0.000585508	conserved Plasmodium protein, unknown function
PF3D7_0207100	PREDICTED	0.006	0.000579334	conserved Plasmodium protein, unknown function
PF3D7_0803200	PREDICTED	0.023	0.000574258	filament assembling protein, putative
PF3D7_1035100	PREDICTED	0.045	0.000564304	probable protein, unknown function
PF3D7_1029900	PREDICTED	0.011	0.000554512	conserved Plasmodium protein, unknown function
PF3D7_0507200	PREDICTED	0.04	0.000542238	subtilisin-like protease 3 (SUB3)
PF3D7_0220800	PREDICTED	0.012	0.000538198	cytoadherence linked asexual protein 2 (CLAG2)
PF3D7_0508000	PREDICTED	0.013	0.000537252	6-cysteine protein (P38)
PF3D7_0704100	PREDICTED	0.035	0.000513003	conserved Plasmodium membrane protein, unknown function
PF3D7_0207800	PREDICTED	0.007	0.000502119	serine repeat antigen 3 (SERA3)
PF3D7_1022700	PREDICTED	0.018	0.000494594	phospholipid scramblase, putative
PF3D7_0611600	PREDICTED	0.04	0.000493879	conserved Plasmodium protein, unknown function
PF3D7_0522600	PREDICTED	0.042	0.000492881	inner membrane complex protein
PF3D7_0932100	PREDICTED	0.025	0.000491257	protein MAM3, putative
PF3D7_0508100	PREDICTED	0.022	0.000491236	SET domain protein, putative (SET9)
PF3D7_1007200	PREDICTED	0.018	0.000489821	rhoGAP GTPase, putative
PF3D7_1430200	PREDICTED	0.031	0.000484885	plasmepsin IX
PF3D7_1320700	PREDICTED	0.017	0.000470689	conserved Plasmodium protein, unknown function
PF3D7_0508900	PREDICTED	0.043	0.000470458	conserved Plasmodium protein, unknown function
PF3D7_0932200	PREDICTED	0.034	0.000456144	profilin, putative (PFN)
PF3D7_0612700	PREDICTED	0.002	0.000453017	6-cysteine protein (P12)
PF3D7_1459900	PREDICTED	0.016	0.000452213	conserved Plasmodium membrane protein, unknown function
PF3D7_0207700	PREDICTED	0.017	0.000425633	serine repeat antigen 4 (SERA4)
PF3D7_1235200	PREDICTED	0.046	0.00042259	V-type K+-independent H+-translocating inorganic pyrophosphatase (VP2)
PF3D7_1345600	PREDICTED	0.017	0.000418365	inner membrane complex protein
PF3D7_0905500	PREDICTED	0.014	0.000363993	conserved Plasmodium protein, unknown function
PF3D7_1224100	PREDICTED	0.035	0.00034104	conserved Plasmodium protein, unknown function
PF3D7_0404900	PREDICTED	0.033	0.000295368	6-cysteine protein (P41)
PF3D7_1027300	PREDICTED	0.03	0.000260379	peroxiredoxin (nPrx)
PF3D7_1031400.2	PREDICTED	0.046	0.000250285	OTU-like cysteine protease, putative
PF3D7_0308100	PREDICTED	0.042	0.000246392	conserved Plasmodium protein, unknown function
PF3D7_0609800	PREDICTED	0.014	0.000242264	palmitoyltransferase, putative (DHHC2)
PF3D7_0704800	PREDICTED	0.034	0.00023413	conserved Plasmodium protein, unknown function
PF3D7_1341500	PREDICTED	0.034	0.000226691	inner membrane complex suture component, putative (ISC1)
PF3D7_1334800	PREDICTED	0.009	0.000217232	MSP7-like protein (MSRP2)
PF3D7_0917300	PREDICTED	0.026	0.00019839	conserved Plasmodium membrane protein, unknown function
PF3D7_0308500	PREDICTED	0.042	0.000152869	activator of Hsp90 ATPase, putative
PF3D7_1434200	PREDICTED	0.034	0.000145415	calmodulin (CAM)
PF3D7_1223000	PREDICTED	0.048	0.000141168	conserved Plasmodium protein, unknown function
PF3D7_1334200	PREDICTED	0.019	0.000124047	chaperone binding protein, putative
PF3D7_1241900	PREDICTED	0.012	0.000122486	tetratricopeptide repeat protein, putative
PF3D7_0811600	PREDICTED	0.021	0.000117677	conserved Plasmodium protein, unknown function
PF3D7_1002800	PREDICTED	0.037	0.00011131	DnaJ protein, putative
PF3D7_0823800	PREDICTED	0.034	0.000110738	DnaJ protein, putative

## Sheet: ES
GeneID	Seed/Predicted	p-value	RWR Score	Description
PF3D7_1133400	SEED			apical membrane antigen 1 (AMA1)
PF3D7_0424100	SEED			reticulocyte binding protein homologue 5 (RH5)
PF3D7_0102500	SEED			erythrocyte binding antigen-181 (EBA181)
PF3D7_0402300	SEED			reticulocyte binding protein homologue 1 (RH1)
PF3D7_0731500	SEED			erythrocyte binding antigen-175 (EBA175)
PF3D7_1028700	SEED			merozoite TRAP-like protein (MTRAP)
PF3D7_1301600	SEED			erythrocyte binding antigen-140 (EBA140)
PF3D7_1035500	SEED			merozoite surface protein 6 (MSP6)
PF3D7_0323400	SEED			Rh5 interacting protein (RIPR)
PF3D7_1335400	SEED			reticulocyte binding protein 2 homologue a (RH2a)
PF3D7_1335300	SEED			reticulocyte binding protein 2 homologue b (RH2b)
PF3D7_1452000	SEED			rhoptry neck protein 2 (RON2)
PF3D7_0817700	SEED			rhoptry neck protein 5 (RON5)
PF3D7_0930300	SEED			merozoite surface protein 1 (MSP1)
PF3D7_1335100	SEED			merozoite surface protein 7 (MSP7)
PF3D7_0708400	SEED			heat shock protein 90 (HSP90)
PF3D7_1251200	PREDICTED	0.013	0.00156706	coronin
PF3D7_0828800	PREDICTED	0.009	0.00153479	GPI-anchored micronemal antigen (GAMA)
PF3D7_1036000	PREDICTED	0.01	0.0015291	merozoite surface protein (MSP11)
PF3D7_0414900	PREDICTED	0.003	0.00152626	armadillo-domain containing rhoptry protein (ARO)
PF3D7_0911100	PREDICTED	0.003	0.00152538	conserved Plasmodium protein, unknown function
PF3D7_0210600	PREDICTED	0.004	0.00150834	conserved Plasmodium protein, unknown function
PF3D7_1143100	PREDICTED	0.007	0.00150671	transcription factor with AP2 domain(s) (AP2-O)
PF3D7_1423300	PREDICTED	0.013	0.00149468	serine/threonine protein phosphatase 7 (PP7)
PF3D7_1126700	PREDICTED	0.008	0.00149196	autophagy-related protein 23, putative (ATG23)
PF3D7_1351700	PREDICTED	0.005	0.00148953	inner membrane complex protein 1f, putative (IMC1f)
PF3D7_1014100	PREDICTED	0.006	0.00148676	conserved Plasmodium protein, unknown function
PF3D7_1035300	PREDICTED	0.013	0.00148622	glutamate-rich protein (GLURP)
PF3D7_0507500	PREDICTED	0.003	0.00148485	subtilisin-like protease 1 (SUB1)
PF3D7_0109000	PREDICTED	0.019	0.00147599	photosensitized INA-labeled protein PHIL1, putative (PHIL1)
PF3D7_0525800	PREDICTED	0.009	0.00146937	inner membrane complex protein 1g, putative (IMC1g)
PF3D7_1310700	PREDICTED	0.004	0.00146818	RNA-binding protein, putative
PF3D7_1342600	PREDICTED	0.012	0.00145906	myosin A (MyoA)
PF3D7_1229800	PREDICTED	0.006	0.00145542	myosin D (MyoD)
PF3D7_0822900	PREDICTED	0.005	0.0014523	conserved Plasmodium protein, unknown function
PF3D7_1003600	PREDICTED	0.005	0.00145062	inner membrane complex protein 1c, putative (IMC1c)
PF3D7_1125700	PREDICTED	0.008	0.00143225	kelch protein, putative
PF3D7_1035900	PREDICTED	0.01	0.00141474	probable protein, unknown function (M566)
PF3D7_1104900	PREDICTED	0.013	0.00137821	calcium/calmodulin-dependent protein kinase, putative
PF3D7_0214600	PREDICTED	0.018	0.00136618	serine/threonine protein kinase, putative
PF3D7_0818100	PREDICTED	0.006	0.00136405	zinc finger protein, putative
PF3D7_1136900	PREDICTED	0.017	0.00136251	subtilisin-like protease 2 (SUB2)
PF3D7_1125800	PREDICTED	0.013	0.00135008	kelch protein, putative
PF3D7_0808200	PREDICTED	0.018	0.00134632	plasmepsin X
PF3D7_1455300	PREDICTED	0.004	0.0013428	conserved Plasmodium protein, unknown function
PF3D7_0302500	PREDICTED	0.006	0.00131761	cytoadherence linked asexual protein 3.1 (CLAG3.1)
PF3D7_0613900	PREDICTED	0.016	0.00130656	myosin E, putative (myoE)
PF3D7_0217500	PREDICTED	0.004	0.00129987	calcium-dependent protein kinase 1 (CDPK1)
PF3D7_0308300	PREDICTED	0.009	0.00129035	conserved Plasmodium protein, unknown function
PF3D7_0725400	PREDICTED	0.004	0.00127239	conserved Plasmodium protein, unknown function
PF3D7_1252400	PREDICTED	0.008	0.00126997	reticulocyte binding protein homologue 3, pseudogene (RH3)
PF3D7_0507400	PREDICTED	0.004	0.00126946	conserved Plasmodium protein, unknown function
PF3D7_1468400	PREDICTED	0.005	0.00126945	zinc finger protein, putative (D13)
PF3D7_1243700	PREDICTED	0.007	0.00126116	ubiquitin-conjugating enzyme E2, putative
PF3D7_0318700	PREDICTED	0.018	0.00125036	trophozoite stage antigen
PF3D7_1017500	PREDICTED	0.012	0.00124801	conserved Plasmodium protein, unknown function
PF3D7_0418600	PREDICTED	0.009	0.00124182	regulator of chromosome condensation, putative
PF3D7_0525300	PREDICTED	0.011	0.00122638	conserved Plasmodium protein, unknown function
PF3D7_1026600	PREDICTED	0.007	0.00120993	conserved Plasmodium protein, unknown function
PF3D7_1332200	PREDICTED	0.009	0.00118383	conserved Plasmodium protein, unknown function
PF3D7_1218000	PREDICTED	0.01	0.0011809	thrombospondin-related apical membrane protein (TRAMP)
PF3D7_0304100	PREDICTED	0.005	0.00117765	inner membrane complex protein 1e, putative (IMC1e)
PF3D7_0913800	PREDICTED	0.003	0.00117556	conserved Plasmodium protein, unknown function
PF3D7_1337800	PREDICTED	0.018	0.0011711	calcium-dependent protein kinase 5 (CDPK5)
PF3D7_0503600	PREDICTED	0.023	0.00116523	myosin B (MyoB)
PF3D7_0206200	PREDICTED	0.005	0.00115596	pantothenate transporter (PAT)
PF3D7_1036500	PREDICTED	0.004	0.00114581	probable protein, unknown function
PF3D7_0919200	PREDICTED	0.013	0.0011451	PPPDE peptidase, putative
PF3D7_0805200	PREDICTED	0.014	0.00114216	gamete release protein, putative (GAMER)
PF3D7_1030200	PREDICTED	0.01	0.00114132	conserved Plasmodium protein, unknown function
PF3D7_0515400	PREDICTED	0.004	0.00113576	conserved Plasmodium protein, unknown function
PF3D7_0403800	PREDICTED	0.009	0.00112295	alpha/beta hydrolase, putative
PF3D7_1461400	PREDICTED	0.005	0.00111582	conserved Plasmodium protein, unknown function
PF3D7_1410400	PREDICTED	0.004	0.0011052	rhoptry-associated protein 1 (RAP1)
PF3D7_0423800	PREDICTED	0.006	0.00109173	cysteine-rich protective antigen (CyRPA)
PF3D7_1007300	PREDICTED	0.007	0.00108767	RING zinc finger protein, putative
PF3D7_1316200	PREDICTED	0.029	0.00107714	ADP-ribosylation factor, putative
PF3D7_0408000	PREDICTED	0.007	0.00103919	conserved Plasmodium protein, unknown function
PF3D7_0722200	PREDICTED	0.007	0.00102754	rhoptry-associated leucine zipper-like protein 1 (RALP1)
PF3D7_0316000	PREDICTED	0.004	0.00101845	microneme associated antigen (MA)
PF3D7_1222700	PREDICTED	0.01	0.00101269	glideosome-associated protein 45 (GAP45)
PF3D7_0613300	PREDICTED	0.015	0.00101235	rhoptry protein ROP14 (ROP14)
PF3D7_0214900	PREDICTED	0.011	0.00098441	rhoptry neck protein 6 (RON6)
PF3D7_1307500	PREDICTED	0.005	0.000979539	conserved Plasmodium protein, unknown function
PF3D7_0102200	PREDICTED	0.031	0.000966532	ring-infected erythrocyte surface antigen (RESA)
PF3D7_1149200	PREDICTED	0.019	0.000958422	ring-infected erythrocyte surface antigen
PF3D7_0914100	PREDICTED	0.005	0.000956694	conserved Plasmodium protein, unknown function
PF3D7_0405900	PREDICTED	0.021	0.000934801	apical sushi protein (ASP)
PF3D7_1204900	PREDICTED	0.013	0.000867934	probable protein, unknown function
PF3D7_0419700	PREDICTED	0.011	0.000867131	apical merozoite protein (Pf34)
PF3D7_0919300	PREDICTED	0.012	0.000864247	thioredoxin-like protein 1, putative (TrxL1)
PF3D7_1246400	PREDICTED	0.013	0.000858797	myosin A tail domain interacting protein (MTIP)
PF3D7_1016000	PREDICTED	0.015	0.00084805	conserved Plasmodium protein, unknown function
PF3D7_0423300	PREDICTED	0.008	0.000835951	conserved Plasmodium protein, unknown function
PF3D7_1116100	PREDICTED	0.032	0.000825382	serine esterase, putative
PF3D7_1037500	PREDICTED	0.046	0.000802516	dynamin-like protein (DYN2)
PF3D7_0620400	PREDICTED	0.013	0.000801586	merozoite surface protein 10 (MSP10)
PF3D7_0424300	PREDICTED	0.008	0.000799323	erythrocyte binding antigen-165, pseudogene (EBA165)
PF3D7_1361800	PREDICTED	0.017	0.000786938	conserved Plasmodium protein, unknown function
PF3D7_1031200	PREDICTED	0.019	0.000782573	MORN repeat-containing protein 1 (MORN1)
PF3D7_0214700	PREDICTED	0.009	0.000773743	conserved Plasmodium protein, unknown function
PF3D7_0501600	PREDICTED	0.019	0.000750356	rhoptry-associated protein 2 (RAP2)
PF3D7_1238900	PREDICTED	0.014	0.000747436	protein kinase 2 (PK2)
PF3D7_1035700	PREDICTED	0.005	0.000745085	duffy binding-like merozoite surface protein (DBLMSP)
PF3D7_0802600	PREDICTED	0.03	0.000734231	adenylyl cyclase beta (ACbeta)
PF3D7_1035400	PREDICTED	0.015	0.000732826	merozoite surface protein 3 (MSP3)
PF3D7_0404700	PREDICTED	0.019	0.000730914	dipeptidyl aminopeptidase 3 (DPAP3)
PF3D7_0618000	PREDICTED	0.003	0.000721504	conserved Plasmodium membrane protein, unknown function
PF3D7_0817600	PREDICTED	0.028	0.000717489	conserved Plasmodium protein, unknown function
PF3D7_1009700	PREDICTED	0.013	0.000713037	tubulin--tyrosine ligase, putative
PF3D7_0506900	PREDICTED	0.019	0.00071247	rhomboid protease ROM4 (ROM4)
PF3D7_1472600	PREDICTED	0.021	0.00070917	protein disulfide-isomerase (PDI-14)
PF3D7_0918700	PREDICTED	0.033	0.000703779	conserved Plasmodium protein, unknown function
PF3D7_0203200	PREDICTED	0.037	0.00070299	conserved Plasmodium protein, unknown function
PF3D7_0212600	PREDICTED	0.005	0.00067619	secreted protein with altered thrombospondin repeat domain (SPATR)
PF3D7_0628100	PREDICTED	0.014	0.000657437	HECT-domain (ubiquitin-transferase), putative
PF3D7_1435600	PREDICTED	0.034	0.000649882	conserved Plasmodium protein, unknown function
PF3D7_1344300	PREDICTED	0.026	0.000647421	conserved protein, unknown function
PF3D7_0831600	PREDICTED	0.035	0.000647073	cytoadherence linked asexual protein 8 (CLAG8)
PF3D7_0407800	PREDICTED	0.019	0.000637766	conserved Plasmodium protein, unknown function
PF3D7_1436600	PREDICTED	0.014	0.000636947	cGMP-dependent protein kinase (PKG)
PF3D7_0905400	PREDICTED	0.018	0.000633908	high molecular weight rhoptry protein 3 (RhopH3)
PF3D7_1017100	PREDICTED	0.026	0.000630967	rhoptry neck protein 12 (RON12)
PF3D7_0528400	PREDICTED	0.017	0.000627242	palmitoyltransferase (DHHC7)
PF3D7_0501500	PREDICTED	0.025	0.000621762	rhoptry-associated protein 3 (RAP3)
PF3D7_0717500	PREDICTED	0.003	0.000608633	calcium-dependent protein kinase 4 (CDPK4)
PF3D7_1412000	PREDICTED	0.028	0.000607543	p1/s1 nuclease, putative
PF3D7_1012200	PREDICTED	0.014	0.000564623	conserved Plasmodium protein, unknown function
PF3D7_1463900	PREDICTED	0.025	0.000563073	conserved Plasmodium membrane protein, unknown function
PF3D7_0920700	PREDICTED	0.004	0.000562363	conserved Plasmodium protein, unknown function
PF3D7_1232500	PREDICTED	0.022	0.000514506	CG2-related protein, putative
PF3D7_1323700	PREDICTED	0.048	0.000505652	glideosome associated protein with multiple membrane spans 1 (GAPM1)
PF3D7_0908500	PREDICTED	0.025	0.000482734	conserved Plasmodium protein, unknown function
PF3D7_1136200	PREDICTED	0.05	0.000467141	conserved Plasmodium protein, unknown function
PF3D7_1140400	PREDICTED	0.022	0.00046017	conserved Plasmodium protein, unknown function
PF3D7_0916000	PREDICTED	0.04	0.000443694	sugar transporter, putative
PF3D7_0507300	PREDICTED	0.013	0.000442892	conserved Plasmodium protein, unknown function
PF3D7_0629300	PREDICTED	0.029	0.000436264	phospholipase, putative (PL)
PF3D7_0207100	PREDICTED	0.006	0.000435556	conserved Plasmodium protein, unknown function
PF3D7_1439500	PREDICTED	0.046	0.000433828	CCAAT-binding transcription factor, putative
PF3D7_0302200	PREDICTED	0.011	0.000422875	cytoadherence linked asexual protein 3.2 (CLAG3.2)
PF3D7_1013800	PREDICTED	0.008	0.000422853	conserved Plasmodium protein, unknown function
PF3D7_0723300	PREDICTED	0.026	0.000401933	conserved Plasmodium protein, unknown function
PF3D7_1460600	PREDICTED	0.012	0.000395351	inner membrane complex sub-compartment protein 3 (ISP3)
PF3D7_0932000	PREDICTED	0.014	0.000388053	conserved Plasmodium protein, unknown function
PF3D7_1409400	PREDICTED	0.037	0.00037154	conserved Plasmodium membrane protein, unknown function
PF3D7_0707300	PREDICTED	0.043	0.000371452	rhoptry-associated membrane antigen (RAMA)
PF3D7_1327300	PREDICTED	0.013	0.000368735	conserved Plasmodium protein, unknown function
PF3D7_1236900	PREDICTED	0.044	0.000355694	conserved Plasmodium protein, unknown function
PF3D7_0934600	PREDICTED	0.016	0.000354883	conserved Plasmodium protein, unknown function
PF3D7_1401600	PREDICTED	0.025	0.000353852	Plasmodium exported protein (PHISTb), unknown function
PF3D7_1406800	PREDICTED	0.028	0.000352081	glideosome associated protein with multiple membrane spans 3 (GAPM3)
PF3D7_1022700	PREDICTED	0.014	0.000344396	phospholipid scramblase, putative
PF3D7_0207000	PREDICTED	0.016	0.000335339	merozoite surface protein 4 (MSP4)
PF3D7_0614700	PREDICTED	0.013	0.000333868	conserved Plasmodium protein, unknown function
PF3D7_0803500	PREDICTED	0.034	0.00031191	AAA family ATPase, putative
PF3D7_1146600	PREDICTED	0.023	0.000310752	CCAAT-box DNA binding protein subunit B (NFYB)
PF3D7_0528300	PREDICTED	0.028	0.000306951	conserved Plasmodium protein, unknown function
PF3D7_0420300	PREDICTED	0.045	0.000306753	transcription factor with AP2 domain(s) (ApiAP2)
PF3D7_1310200	PREDICTED	0.023	0.000305866	conserved Plasmodium protein, unknown function
PF3D7_0621100	PREDICTED	0.047	0.000299542	conserved Plasmodium protein, unknown function
PF3D7_0220800	PREDICTED	0.036	0.000279394	cytoadherence linked asexual protein 2 (CLAG2)
PF3D7_0207800	PREDICTED	0.039	0.000247898	serine repeat antigen 3 (SERA3)
PF3D7_1404700	PREDICTED	0.011	0.000247214	conserved Plasmodium protein, unknown function
PF3D7_1007200	PREDICTED	0.029	0.000245852	rhoGAP GTPase, putative
PF3D7_1035600	PREDICTED	0.024	0.000236964	merozoite surface protein (H101)
PF3D7_0612700	PREDICTED	0.025	0.00022187	6-cysteine protein (P12)
PF3D7_0207700	PREDICTED	0.033	0.000207268	serine repeat antigen 4 (SERA4)
PF3D7_0620300	PREDICTED	0.01	0.000203095	conserved Plasmodium protein, unknown function
PF3D7_0920500	PREDICTED	0.045	0.000188145	ADP-ribosylation factor, putative
PF3D7_1027300	PREDICTED	0.024	0.00013527	peroxiredoxin (nPrx)
PF3D7_1003400	PREDICTED	0.036	0.000129769	conserved Plasmodium protein, unknown function
PF3D7_1423100	PREDICTED	0.036	0.000122257	ankyrin, putative
PF3D7_1036300	PREDICTED	0.008	0.000102979	merozoite surface protein (DBLMSP2)

## Sheet: LS
GeneID	Seed/Predicted	p-value	RWR Score	Description
PF3D7_0424100	SEED			reticulocyte binding protein homologue 5 (RH5)
PF3D7_0102500	SEED			erythrocyte binding antigen-181 (EBA181)
PF3D7_1133400	SEED			apical membrane antigen 1 (AMA1)
PF3D7_0731500	SEED			erythrocyte binding antigen-175 (EBA175)
PF3D7_1301600	SEED			erythrocyte binding antigen-140 (EBA140)
PF3D7_0402300	SEED			reticulocyte binding protein homologue 1 (RH1)
PF3D7_1028700	SEED			merozoite TRAP-like protein (MTRAP)
PF3D7_1035500	SEED			merozoite surface protein 6 (MSP6)
PF3D7_0323400	SEED			Rh5 interacting protein (RIPR)
PF3D7_1335400	SEED			reticulocyte binding protein 2 homologue a (RH2a)
PF3D7_1335300	SEED			reticulocyte binding protein 2 homologue b (RH2b)
PF3D7_0424200	SEED			reticulocyte binding protein homologue 4 (RH4)
PF3D7_1452000	SEED			rhoptry neck protein 2 (RON2)
PF3D7_0817700	SEED			rhoptry neck protein 5 (RON5)
PF3D7_0930300	SEED			merozoite surface protein 1 (MSP1)
PF3D7_1335100	SEED			merozoite surface protein 7 (MSP7)
PF3D7_0708400	SEED			heat shock protein 90 (HSP90)
PF3D7_0828800	PREDICTED	0.009	0.00178862	GPI-anchored micronemal antigen (GAMA)
PF3D7_0911100	PREDICTED	0.007	0.00174219	conserved Plasmodium protein, unknown function
PF3D7_1143100	PREDICTED	0.017	0.00169248	transcription factor with AP2 domain(s) (AP2-O)
PF3D7_1125800	PREDICTED	0.01	0.00159395	kelch protein, putative
PF3D7_1136900	PREDICTED	0.018	0.00158716	subtilisin-like protease 2 (SUB2)
PF3D7_0214600	PREDICTED	0.012	0.00158526	serine/threonine protein kinase, putative
PF3D7_1252400	PREDICTED	0.006	0.00153062	reticulocyte binding protein homologue 3, pseudogene (RH3)
PF3D7_0302500	PREDICTED	0.002	0.00149615	cytoadherence linked asexual protein 3.1 (CLAG3.1)
PF3D7_0318700	PREDICTED	0.007	0.00148753	trophozoite stage antigen
PF3D7_1251200	PREDICTED	0.018	0.00146335	coronin
PF3D7_0525300	PREDICTED	0.016	0.00143694	conserved Plasmodium protein, unknown function
PF3D7_1036000	PREDICTED	0.011	0.00142519	merozoite surface protein (MSP11)
PF3D7_0414900	PREDICTED	0.006	0.00142461	armadillo-domain containing rhoptry protein (ARO)
PF3D7_1337800	PREDICTED	0.012	0.00141002	calcium-dependent protein kinase 5 (CDPK5)
PF3D7_0210600	PREDICTED	0.004	0.00140281	conserved Plasmodium protein, unknown function
PF3D7_1423300	PREDICTED	0.009	0.00139644	serine/threonine protein phosphatase 7 (PP7)
PF3D7_1218000	PREDICTED	0.014	0.00139248	thrombospondin-related apical membrane protein (TRAMP)
PF3D7_1126700	PREDICTED	0.014	0.00138632	autophagy-related protein 23, putative (ATG23)
PF3D7_1035300	PREDICTED	0.012	0.00138618	glutamate-rich protein (GLURP)
PF3D7_1351700	PREDICTED	0.006	0.00138327	inner membrane complex protein 1f, putative (IMC1f)
PF3D7_1014100	PREDICTED	0.003	0.00138312	conserved Plasmodium protein, unknown function
PF3D7_0507500	PREDICTED	0.004	0.00138122	subtilisin-like protease 1 (SUB1)
PF3D7_0109000	PREDICTED	0.016	0.00137289	photosensitized INA-labeled protein PHIL1, putative (PHIL1)
PF3D7_1310700	PREDICTED	0.007	0.00136825	RNA-binding protein, putative
PF3D7_0525800	PREDICTED	0.007	0.00136797	inner membrane complex protein 1g, putative (IMC1g)
PF3D7_1342600	PREDICTED	0.021	0.00135948	myosin A (MyoA)
PF3D7_1229800	PREDICTED	0.009	0.00135584	myosin D (MyoD)
PF3D7_0822900	PREDICTED	0.012	0.00135085	conserved Plasmodium protein, unknown function
PF3D7_1003600	PREDICTED	0.005	0.00134772	inner membrane complex protein 1c, putative (IMC1c)
PF3D7_1125700	PREDICTED	0.014	0.00133049	kelch protein, putative
PF3D7_1035900	PREDICTED	0.013	0.00131868	probable protein, unknown function (M566)
PF3D7_1104900	PREDICTED	0.02	0.00128021	calcium/calmodulin-dependent protein kinase, putative
PF3D7_0818100	PREDICTED	0.007	0.00126863	zinc finger protein, putative
PF3D7_0808200	PREDICTED	0.024	0.00125086	plasmepsin X
PF3D7_1455300	PREDICTED	0.01	0.00124509	conserved Plasmodium protein, unknown function
PF3D7_1149200	PREDICTED	0.011	0.00121737	ring-infected erythrocyte surface antigen
PF3D7_0613900	PREDICTED	0.024	0.00121575	myosin E, putative (myoE)
PF3D7_0217500	PREDICTED	0.009	0.00121144	calcium-dependent protein kinase 1 (CDPK1)
PF3D7_0308300	PREDICTED	0.02	0.00120138	conserved Plasmodium protein, unknown function
PF3D7_1356800	PREDICTED	0.018	0.00118775	serine/threonine protein kinase, putative (ARK3)
PF3D7_0725400	PREDICTED	0.003	0.00117788	conserved Plasmodium protein, unknown function
PF3D7_1468400	PREDICTED	0.006	0.00117701	zinc finger protein, putative (D13)
PF3D7_0507400	PREDICTED	0.016	0.00117637	conserved Plasmodium protein, unknown function
PF3D7_1243700	PREDICTED	0.011	0.00117179	ubiquitin-conjugating enzyme E2, putative
PF3D7_1017500	PREDICTED	0.015	0.00115971	conserved Plasmodium protein, unknown function
PF3D7_0418600	PREDICTED	0.006	0.00115793	regulator of chromosome condensation, putative
PF3D7_1026600	PREDICTED	0.005	0.00112415	conserved Plasmodium protein, unknown function
PF3D7_0424300	PREDICTED	0.004	0.00111577	erythrocyte binding antigen-165, pseudogene (EBA165)
PF3D7_1332200	PREDICTED	0.012	0.00109827	conserved Plasmodium protein, unknown function
PF3D7_0304100	PREDICTED	0.007	0.00109148	inner membrane complex protein 1e, putative (IMC1e)
PF3D7_0913800	PREDICTED	0.007	0.00108735	conserved Plasmodium protein, unknown function
PF3D7_0503600	PREDICTED	0.02	0.00107747	myosin B (MyoB)
PF3D7_0206200	PREDICTED	0.012	0.00107203	pantothenate transporter (PAT)
PF3D7_0919200	PREDICTED	0.02	0.00106358	PPPDE peptidase, putative
PF3D7_1036500	PREDICTED	0.007	0.00106326	probable protein, unknown function
PF3D7_0805200	PREDICTED	0.018	0.00105817	gamete release protein, putative (GAMER)
PF3D7_0515400	PREDICTED	0.003	0.00105629	conserved Plasmodium protein, unknown function
PF3D7_1030200	PREDICTED	0.011	0.00105462	conserved Plasmodium protein, unknown function
PF3D7_1116100	PREDICTED	0.019	0.00104348	serine esterase, putative
PF3D7_0403800	PREDICTED	0.016	0.00104246	alpha/beta hydrolase, putative
PF3D7_1461400	PREDICTED	0.002	0.00103963	conserved Plasmodium protein, unknown function
PF3D7_1410400	PREDICTED	0.012	0.00102942	rhoptry-associated protein 1 (RAP1)
PF3D7_0423800	PREDICTED	0.002	0.0010177	cysteine-rich protective antigen (CyRPA)
PF3D7_1007300	PREDICTED	0.013	0.00101105	RING zinc finger protein, putative
PF3D7_0408000	PREDICTED	0.005	0.000963804	conserved Plasmodium protein, unknown function
PF3D7_0722200	PREDICTED	0.011	0.000959276	rhoptry-associated leucine zipper-like protein 1 (RALP1)
PF3D7_1222700	PREDICTED	0.01	0.000944526	glideosome-associated protein 45 (GAP45)
PF3D7_0613300	PREDICTED	0.009	0.000944271	rhoptry protein ROP14 (ROP14)
PF3D7_0316000	PREDICTED	0.001	0.000942338	microneme associated antigen (MA)
PF3D7_0918700	PREDICTED	0.017	0.000936483	conserved Plasmodium protein, unknown function
PF3D7_0214900	PREDICTED	0.014	0.000919158	rhoptry neck protein 6 (RON6)
PF3D7_1307500	PREDICTED	0.004	0.00090683	conserved Plasmodium protein, unknown function
PF3D7_0102200	PREDICTED	0.049	0.000903312	ring-infected erythrocyte surface antigen (RESA)
PF3D7_0914100	PREDICTED	0.004	0.000887504	conserved Plasmodium protein, unknown function
PF3D7_0405900	PREDICTED	0.018	0.00087454	apical sushi protein (ASP)
PF3D7_0419700	PREDICTED	0.008	0.000810322	apical merozoite protein (Pf34)
PF3D7_1204900	PREDICTED	0.004	0.000807029	probable protein, unknown function
PF3D7_0919300	PREDICTED	0.027	0.000800375	thioredoxin-like protein 1, putative (TrxL1)
PF3D7_1246400	PREDICTED	0.012	0.000798745	myosin A tail domain interacting protein (MTIP)
PF3D7_1016000	PREDICTED	0.009	0.000785726	conserved Plasmodium protein, unknown function
PF3D7_0423300	PREDICTED	0.021	0.000783136	conserved Plasmodium protein, unknown function
PF3D7_0805300	PREDICTED	0.012	0.000778014	conserved Plasmodium protein, unknown function
PF3D7_0620400	PREDICTED	0.013	0.000749714	merozoite surface protein 10 (MSP10)
PF3D7_1361800	PREDICTED	0.026	0.000737844	conserved Plasmodium protein, unknown function
PF3D7_1031200	PREDICTED	0.018	0.000733433	MORN repeat-containing protein 1 (MORN1)
PF3D7_0214700	PREDICTED	0.014	0.000718364	conserved Plasmodium protein, unknown function
PF3D7_0501600	PREDICTED	0.033	0.000705493	rhoptry-associated protein 2 (RAP2)
PF3D7_0507300	PREDICTED	0.011	0.000699402	conserved Plasmodium protein, unknown function
PF3D7_1035700	PREDICTED	0.005	0.000696984	duffy binding-like merozoite surface protein (DBLMSP)
PF3D7_1238900	PREDICTED	0.018	0.000693781	protein kinase 2 (PK2)
PF3D7_0802600	PREDICTED	0.026	0.000687765	adenylyl cyclase beta (ACbeta)
PF3D7_0404700	PREDICTED	0.014	0.000685803	dipeptidyl aminopeptidase 3 (DPAP3)
PF3D7_1035400	PREDICTED	0.037	0.000682574	merozoite surface protein 3 (MSP3)
PF3D7_0618000	PREDICTED	0.005	0.000677509	conserved Plasmodium membrane protein, unknown function
PF3D7_0817600	PREDICTED	0.028	0.000673546	conserved Plasmodium protein, unknown function
PF3D7_1009700	PREDICTED	0.015	0.000669947	tubulin--tyrosine ligase, putative
PF3D7_0506900	PREDICTED	0.018	0.00066706	rhomboid protease ROM4 (ROM4)
PF3D7_1472600	PREDICTED	0.043	0.000664995	protein disulfide-isomerase (PDI-14)
PF3D7_0203200	PREDICTED	0.038	0.000655691	conserved Plasmodium protein, unknown function
PF3D7_0212600	PREDICTED	0.015	0.00062473	secreted protein with altered thrombospondin repeat domain (SPATR)
PF3D7_0206800	PREDICTED	0.024	0.000620986	merozoite surface protein 2 (MSP2)
PF3D7_0628100	PREDICTED	0.022	0.000618317	HECT-domain (ubiquitin-transferase), putative
PF3D7_1435600	PREDICTED	0.037	0.000608702	conserved Plasmodium protein, unknown function
PF3D7_0831600	PREDICTED	0.039	0.000607744	cytoadherence linked asexual protein 8 (CLAG8)
PF3D7_1344300	PREDICTED	0.038	0.000607348	conserved protein, unknown function
PF3D7_0407800	PREDICTED	0.018	0.000599541	conserved Plasmodium protein, unknown function
PF3D7_1436600	PREDICTED	0.005	0.000598229	cGMP-dependent protein kinase (PKG)
PF3D7_0905400	PREDICTED	0.02	0.000595808	high molecular weight rhoptry protein 3 (RhopH3)
PF3D7_1017100	PREDICTED	0.039	0.00059294	rhoptry neck protein 12 (RON12)
PF3D7_0528400	PREDICTED	0.011	0.000589661	palmitoyltransferase (DHHC7)
PF3D7_0501500	PREDICTED	0.027	0.000585225	rhoptry-associated protein 3 (RAP3)
PF3D7_0717500	PREDICTED	0.014	0.000571955	calcium-dependent protein kinase 4 (CDPK4)
PF3D7_1412000	PREDICTED	0.043	0.000571519	p1/s1 nuclease, putative
PF3D7_1118700	PREDICTED	0.045	0.00053647	myosin light chain B (MLC-B)
PF3D7_1012200	PREDICTED	0.023	0.000532185	conserved Plasmodium protein, unknown function
PF3D7_1463900	PREDICTED	0.04	0.000532037	conserved Plasmodium membrane protein, unknown function
PF3D7_0920700	PREDICTED	0.006	0.000528184	conserved Plasmodium protein, unknown function
PF3D7_0908500	PREDICTED	0.03	0.00045193	conserved Plasmodium protein, unknown function
PF3D7_1140400	PREDICTED	0.022	0.000434499	conserved Plasmodium protein, unknown function
PF3D7_0916000	PREDICTED	0.049	0.000418847	sugar transporter, putative
PF3D7_0207100	PREDICTED	0.009	0.000407909	conserved Plasmodium protein, unknown function
PF3D7_0629300	PREDICTED	0.037	0.000406839	phospholipase, putative (PL)
PF3D7_1013800	PREDICTED	0.024	0.000400014	conserved Plasmodium protein, unknown function
PF3D7_0302200	PREDICTED	0.006	0.000399507	cytoadherence linked asexual protein 3.2 (CLAG3.2)
PF3D7_0723300	PREDICTED	0.032	0.000380061	conserved Plasmodium protein, unknown function
PF3D7_1460600	PREDICTED	0.012	0.000371548	inner membrane complex sub-compartment protein 3 (ISP3)
PF3D7_0932000	PREDICTED	0.025	0.000360843	conserved Plasmodium protein, unknown function
PF3D7_0318500	PREDICTED	0.025	0.00035626	conserved Plasmodium protein, unknown function
PF3D7_1327300	PREDICTED	0.018	0.000345911	conserved Plasmodium protein, unknown function
PF3D7_1406800	PREDICTED	0.03	0.000332383	glideosome associated protein with multiple membrane spans 3 (GAPM3)
PF3D7_0934600	PREDICTED	0.017	0.000330088	conserved Plasmodium protein, unknown function
PF3D7_1401600	PREDICTED	0.024	0.000329859	Plasmodium exported protein (PHISTb), unknown function
PF3D7_1022700	PREDICTED	0.033	0.000324201	phospholipid scramblase, putative
PF3D7_0207000	PREDICTED	0.026	0.000314138	merozoite surface protein 4 (MSP4)
PF3D7_1146600	PREDICTED	0.048	0.000294731	CCAAT-box DNA binding protein subunit B (NFYB)
PF3D7_1310200	PREDICTED	0.041	0.000289147	conserved Plasmodium protein, unknown function
PF3D7_0528300	PREDICTED	0.037	0.000287474	conserved Plasmodium protein, unknown function
PF3D7_0220800	PREDICTED	0.04	0.00026663	cytoadherence linked asexual protein 2 (CLAG2)
PF3D7_1206300	PREDICTED	0.039	0.000251492	conserved Plasmodium protein, unknown function
PF3D7_1007200	PREDICTED	0.042	0.000235213	rhoGAP GTPase, putative
PF3D7_1404700	PREDICTED	0.013	0.000227795	conserved Plasmodium protein, unknown function
PF3D7_1035600	PREDICTED	0.037	0.000221113	merozoite surface protein (H101)
PF3D7_0612700	PREDICTED	0.032	0.000211213	6-cysteine protein (P12)
PF3D7_0207700	PREDICTED	0.05	0.000196589	serine repeat antigen 4 (SERA4)
PF3D7_0620300	PREDICTED	0.012	0.000190353	conserved Plasmodium protein, unknown function
PF3D7_1027300	PREDICTED	0.037	0.000129254	peroxiredoxin (nPrx)
PF3D7_1423100	PREDICTED	0.05	0.000115825	ankyrin, putative

## Sheet: M
GeneID	Seed/Predicted	p-value	RWR Score	Description
PF3D7_0102500	SEED			erythrocyte binding antigen-181 (EBA181)
PF3D7_0424100	SEED			reticulocyte binding protein homologue 5 (RH5)
PF3D7_1133400	SEED			apical membrane antigen 1 (AMA1)
PF3D7_0731500	SEED			erythrocyte binding antigen-175 (EBA175)
PF3D7_1301600	SEED			erythrocyte binding antigen-140 (EBA140)
PF3D7_0402300	SEED			reticulocyte binding protein homologue 1 (RH1)
PF3D7_1028700	SEED			merozoite TRAP-like protein (MTRAP)
PF3D7_1035500	SEED			merozoite surface protein 6 (MSP6)
PF3D7_0323400	SEED			Rh5 interacting protein (RIPR)
PF3D7_1335400	SEED			reticulocyte binding protein 2 homologue a (RH2a)
PF3D7_1335300	SEED			reticulocyte binding protein 2 homologue b (RH2b)
PF3D7_1452000	SEED			rhoptry neck protein 2 (RON2)
PF3D7_0424200	SEED			reticulocyte binding protein homologue 4 (RH4)
PF3D7_0817700	SEED			rhoptry neck protein 5 (RON5)
PF3D7_0930300	SEED			merozoite surface protein 1 (MSP1)
PF3D7_1335100	SEED			merozoite surface protein 7 (MSP7)
PF3D7_0708400	SEED			heat shock protein 90 (HSP90)
PF3D7_0828800	PREDICTED	0.006	0.00189755	GPI-anchored micronemal antigen (GAMA)
PF3D7_0911100	PREDICTED	0.006	0.00184946	conserved Plasmodium protein, unknown function
PF3D7_1143100	PREDICTED	0.019	0.00180506	transcription factor with AP2 domain(s) (AP2-O)
PF3D7_1136900	PREDICTED	0.023	0.00166964	subtilisin-like protease 2 (SUB2)
PF3D7_1125800	PREDICTED	0.024	0.00166353	kelch protein, putative
PF3D7_0214600	PREDICTED	0.02	0.00165869	serine/threonine protein kinase, putative
PF3D7_0302500	PREDICTED	0.002	0.00161053	cytoadherence linked asexual protein 3.1 (CLAG3.1)
PF3D7_1251200	PREDICTED	0.008	0.00159746	coronin
PF3D7_1252400	PREDICTED	0.01	0.00157864	reticulocyte binding protein homologue 3, pseudogene (RH3)
PF3D7_1036000	PREDICTED	0.008	0.00155424	merozoite surface protein (MSP11)
PF3D7_0414900	PREDICTED	0.008	0.00155123	armadillo-domain containing rhoptry protein (ARO)
PF3D7_0318700	PREDICTED	0.019	0.00153369	trophozoite stage antigen
PF3D7_1423300	PREDICTED	0.007	0.0015257	serine/threonine protein phosphatase 7 (PP7)
PF3D7_0210600	PREDICTED	0.012	0.00152473	conserved Plasmodium protein, unknown function
PF3D7_1035300	PREDICTED	0.016	0.00152305	glutamate-rich protein (GLURP)
PF3D7_1126700	PREDICTED	0.013	0.00151893	autophagy-related protein 23, putative (ATG23)
PF3D7_1351700	PREDICTED	0.01	0.00150971	inner membrane complex protein 1f, putative (IMC1f)
PF3D7_1014100	PREDICTED	0.006	0.00150828	conserved Plasmodium protein, unknown function
PF3D7_0507500	PREDICTED	0.005	0.00150168	subtilisin-like protease 1 (SUB1)
PF3D7_0109000	PREDICTED	0.027	0.00149909	photosensitized INA-labeled protein PHIL1, putative (PHIL1)
PF3D7_0525300	PREDICTED	0.022	0.00149824	conserved Plasmodium protein, unknown function
PF3D7_0525800	PREDICTED	0.011	0.00149244	inner membrane complex protein 1g, putative (IMC1g)
PF3D7_1310700	PREDICTED	0.009	0.00149106	RNA-binding protein, putative
PF3D7_1229800	PREDICTED	0.004	0.0014863	myosin D (MyoD)
PF3D7_1342600	PREDICTED	0.021	0.00147838	myosin A (MyoA)
PF3D7_0822900	PREDICTED	0.016	0.00147511	conserved Plasmodium protein, unknown function
PF3D7_1003600	PREDICTED	0.007	0.00147317	inner membrane complex protein 1c, putative (IMC1c)
PF3D7_1218000	PREDICTED	0.026	0.00145396	thrombospondin-related apical membrane protein (TRAMP)
PF3D7_1337800	PREDICTED	0.022	0.00144953	calcium-dependent protein kinase 5 (CDPK5)
PF3D7_1125700	PREDICTED	0.018	0.00144247	kelch protein, putative
PF3D7_1035900	PREDICTED	0.012	0.00144171	probable protein, unknown function (M566)
PF3D7_1104900	PREDICTED	0.017	0.00140345	calcium/calmodulin-dependent protein kinase, putative
PF3D7_0402200	PREDICTED	0.017	0.00137082	surface-associated interspersed protein 4.1 (SURFIN 4.1), pseudogene (SURF4.1)
PF3D7_0818100	PREDICTED	0.011	0.00136104	zinc finger protein, putative
PF3D7_0217500	PREDICTED	0.013	0.001345	calcium-dependent protein kinase 1 (CDPK1)
PF3D7_1455300	PREDICTED	0.011	0.00134209	conserved Plasmodium protein, unknown function
PF3D7_0808200	PREDICTED	0.022	0.00134	plasmepsin X
PF3D7_0613900	PREDICTED	0.038	0.00133712	myosin E, putative (myoE)
PF3D7_1356800	PREDICTED	0.026	0.00130848	serine/threonine protein kinase, putative (ARK3)
PF3D7_1243700	PREDICTED	0.023	0.00129404	ubiquitin-conjugating enzyme E2, putative
PF3D7_0308300	PREDICTED	0.02	0.00128573	conserved Plasmodium protein, unknown function
PF3D7_1468400	PREDICTED	0.011	0.00128552	zinc finger protein, putative (D13)
PF3D7_0725400	PREDICTED	0.009	0.00127016	conserved Plasmodium protein, unknown function
PF3D7_0507400	PREDICTED	0.009	0.00126419	conserved Plasmodium protein, unknown function
PF3D7_1149200	PREDICTED	0.014	0.00124219	ring-infected erythrocyte surface antigen
PF3D7_0418600	PREDICTED	0.008	0.00122929	regulator of chromosome condensation, putative
PF3D7_1017500	PREDICTED	0.015	0.00122426	conserved Plasmodium protein, unknown function
PF3D7_1332200	PREDICTED	0.012	0.00120358	conserved Plasmodium protein, unknown function
PF3D7_0304100	PREDICTED	0.008	0.00118411	inner membrane complex protein 1e, putative (IMC1e)
PF3D7_1026600	PREDICTED	0.011	0.00117853	conserved Plasmodium protein, unknown function
PF3D7_0206200	PREDICTED	0.008	0.00116896	pantothenate transporter (PAT)
PF3D7_1410400	PREDICTED	0.014	0.0011545	rhoptry-associated protein 1 (RAP1)
PF3D7_0913800	PREDICTED	0.008	0.00115301	conserved Plasmodium protein, unknown function
PF3D7_1461400	PREDICTED	0.014	0.00115146	conserved Plasmodium protein, unknown function
PF3D7_1116100	PREDICTED	0.033	0.00114722	serine esterase, putative
PF3D7_0424300	PREDICTED	0.009	0.00113247	erythrocyte binding antigen-165, pseudogene (EBA165)
PF3D7_0515400	PREDICTED	0.005	0.00113172	conserved Plasmodium protein, unknown function
PF3D7_0503600	PREDICTED	0.009	0.00113037	myosin B (MyoB)
PF3D7_1030200	PREDICTED	0.019	0.00112774	conserved Plasmodium protein, unknown function
PF3D7_0403800	PREDICTED	0.025	0.00112371	alpha/beta hydrolase, putative
PF3D7_1036500	PREDICTED	0.02	0.00111613	probable protein, unknown function
PF3D7_0919200	PREDICTED	0.026	0.00111589	PPPDE peptidase, putative
PF3D7_1007300	PREDICTED	0.014	0.0011154	RING zinc finger protein, putative
PF3D7_0423800	PREDICTED	0.01	0.00111539	cysteine-rich protective antigen (CyRPA)
PF3D7_0805200	PREDICTED	0.031	0.00111112	gamete release protein, putative (GAMER)
PF3D7_0722200	PREDICTED	0.016	0.00108	rhoptry-associated leucine zipper-like protein 1 (RALP1)
PF3D7_1222700	PREDICTED	0.007	0.00105945	glideosome-associated protein 45 (GAP45)
PF3D7_0214900	PREDICTED	0.008	0.00102754	rhoptry neck protein 6 (RON6)
PF3D7_0405900	PREDICTED	0.015	0.00099396	apical sushi protein (ASP)
PF3D7_0316000	PREDICTED	0.009	0.000990505	microneme associated antigen (MA)
PF3D7_1307500	PREDICTED	0.015	0.000975533	conserved Plasmodium protein, unknown function
PF3D7_0918700	PREDICTED	0.03	0.000953629	conserved Plasmodium protein, unknown function
PF3D7_0914100	PREDICTED	0.009	0.000952106	conserved Plasmodium protein, unknown function
PF3D7_0419700	PREDICTED	0.004	0.000914307	apical merozoite protein (Pf34)
PF3D7_0423300	PREDICTED	0.009	0.000897701	conserved Plasmodium protein, unknown function
PF3D7_1204900	PREDICTED	0.017	0.000856872	probable protein, unknown function
PF3D7_1246400	PREDICTED	0.021	0.000854902	myosin A tail domain interacting protein (MTIP)
PF3D7_1016000	PREDICTED	0.016	0.000853992	conserved Plasmodium protein, unknown function
PF3D7_0620400	PREDICTED	0.011	0.000853382	merozoite surface protein 10 (MSP10)
PF3D7_1361800	PREDICTED	0.021	0.000853262	conserved Plasmodium protein, unknown function
PF3D7_0919300	PREDICTED	0.031	0.000848492	thioredoxin-like protein 1, putative (TrxL1)
PF3D7_1031200	PREDICTED	0.021	0.000838543	MORN repeat-containing protein 1 (MORN1)
PF3D7_0501600	PREDICTED	0.01	0.000821746	rhoptry-associated protein 2 (RAP2)
PF3D7_1035700	PREDICTED	0.007	0.000808667	duffy binding-like merozoite surface protein (DBLMSP)
PF3D7_0805300	PREDICTED	0.01	0.000802494	conserved Plasmodium protein, unknown function
PF3D7_0404700	PREDICTED	0.035	0.000797494	dipeptidyl aminopeptidase 3 (DPAP3)
PF3D7_0802600	PREDICTED	0.033	0.000792643	adenylyl cyclase beta (ACbeta)
PF3D7_0618000	PREDICTED	0.008	0.000788034	conserved Plasmodium membrane protein, unknown function
PF3D7_0817600	PREDICTED	0.028	0.00078279	conserved Plasmodium protein, unknown function
PF3D7_1009700	PREDICTED	0.011	0.000779739	tubulin--tyrosine ligase, putative
PF3D7_1472600	PREDICTED	0.035	0.00077654	protein disulfide-isomerase (PDI-14)
PF3D7_0506900	PREDICTED	0.014	0.00076146	rhomboid protease ROM4 (ROM4)
PF3D7_1238900	PREDICTED	0.009	0.00073498	protein kinase 2 (PK2)
PF3D7_0628100	PREDICTED	0.016	0.000727044	HECT-domain (ubiquitin-transferase), putative
PF3D7_1035400	PREDICTED	0.032	0.000723559	merozoite surface protein 3 (MSP3)
PF3D7_0507300	PREDICTED	0.012	0.000710869	conserved Plasmodium protein, unknown function
PF3D7_0407800	PREDICTED	0.021	0.000708037	conserved Plasmodium protein, unknown function
PF3D7_1436600	PREDICTED	0.008	0.000705406	cGMP-dependent protein kinase (PKG)
PF3D7_0905400	PREDICTED	0.014	0.000704351	high molecular weight rhoptry protein 3 (RhopH3)
PF3D7_1435600	PREDICTED	0.027	0.000702576	conserved Plasmodium protein, unknown function
PF3D7_0528400	PREDICTED	0.017	0.000699181	palmitoyltransferase (DHHC7)
PF3D7_0203200	PREDICTED	0.047	0.000696667	conserved Plasmodium protein, unknown function
PF3D7_0501500	PREDICTED	0.013	0.00069354	rhoptry-associated protein 3 (RAP3)
PF3D7_0717500	PREDICTED	0.013	0.000672304	calcium-dependent protein kinase 4 (CDPK4)
PF3D7_1412000	PREDICTED	0.027	0.000670061	p1/s1 nuclease, putative
PF3D7_0414800	PREDICTED	0.019	0.000666277	conserved Plasmodium protein, unknown function
PF3D7_0212600	PREDICTED	0.026	0.00066211	secreted protein with altered thrombospondin repeat domain (SPATR)
PF3D7_1012200	PREDICTED	0.017	0.000636829	conserved Plasmodium protein, unknown function
PF3D7_0206800	PREDICTED	0.018	0.000634405	merozoite surface protein 2 (MSP2)
PF3D7_0920700	PREDICTED	0.007	0.000618853	conserved Plasmodium protein, unknown function
PF3D7_1232500	PREDICTED	0.044	0.000587235	CG2-related protein, putative
PF3D7_1323700	PREDICTED	0.046	0.000576902	glideosome associated protein with multiple membrane spans 1 (GAPM1)
PF3D7_0916000	PREDICTED	0.048	0.000509715	sugar transporter, putative
PF3D7_0302200	PREDICTED	0.011	0.000492625	cytoadherence linked asexual protein 3.2 (CLAG3.2)
PF3D7_1013800	PREDICTED	0.022	0.000484353	conserved Plasmodium protein, unknown function
PF3D7_0723300	PREDICTED	0.03	0.000462657	conserved Plasmodium protein, unknown function
PF3D7_0207100	PREDICTED	0.005	0.000461178	conserved Plasmodium protein, unknown function
PF3D7_1409400	PREDICTED	0.04	0.000442928	conserved Plasmodium membrane protein, unknown function
PF3D7_1460600	PREDICTED	0.024	0.000437804	inner membrane complex sub-compartment protein 3 (ISP3)
PF3D7_1406800	PREDICTED	0.02	0.000415523	glideosome associated protein with multiple membrane spans 3 (GAPM3)
PF3D7_1022700	PREDICTED	0.026	0.000391455	phospholipid scramblase, putative
PF3D7_0932000	PREDICTED	0.033	0.000387786	conserved Plasmodium protein, unknown function
PF3D7_1327300	PREDICTED	0.03	0.00037597	conserved Plasmodium protein, unknown function
PF3D7_1401600	PREDICTED	0.039	0.000370341	Plasmodium exported protein (PHISTb), unknown function
PF3D7_1310200	PREDICTED	0.029	0.000359638	conserved Plasmodium protein, unknown function
PF3D7_0934600	PREDICTED	0.023	0.00034864	conserved Plasmodium protein, unknown function
PF3D7_0803500	PREDICTED	0.047	0.000312548	AAA family ATPase, putative
PF3D7_1007200	PREDICTED	0.048	0.000308326	rhoGAP GTPase, putative
PF3D7_0612700	PREDICTED	0.013	0.000276995	6-cysteine protein (P12)
PF3D7_1231200	PREDICTED	0.013	0.000267887	conserved Plasmodium protein, unknown function
PF3D7_1035600	PREDICTED	0.031	0.000259787	merozoite surface protein (H101)
PF3D7_1137200	PREDICTED	0.035	0.000242499	conserved Plasmodium protein, unknown function
PF3D7_1436200	PREDICTED	0.047	0.000237146	conserved Plasmodium protein, unknown function
PF3D7_0405200	PREDICTED	0.02	0.00018971	ag-1 blood stage membrane protein homologue (MAg-1)
PF3D7_1027300	PREDICTED	0.033	0.000159791	peroxiredoxin (nPrx)
