# Supplementary material for: A network-based approach reveals novel invasion and Maurer's clefts-related proteins in Plasmodium falciparum
Source: Royal Society of Chemistry journal article supplement (doi:10.1039/c9mo00124g), 2019-10-10
Supplement: c9mo00124g1.zip [file c9mo00124g1.zip › supplementary_file_5.xls]

## Sheet: Details
A network-based approach reveals novel invasion and Maurer’s clefts-related proteins in Plasmodium falciparum
Dibyajyoti Das, Sowmya Ramaswamy Krishnan, Arijit Roy* and Gopalakrishnan Bulusu*
TCS Innovation Labs – Hyderabad (Life Sciences Division), Tata Consultancy Services Limited, Hyderabad, India
* Corresponding author
E-mail: roy.arijit3@tcs.com, g.bulusu@tcs.com
Supplementary file 5: Unique invasion and Maurer's clefts proteins predicted from all seven intra-erythrocytic stages along with their GO terms and stage specific information. All seed proteins are also shown along with their GO terms.
Each tab contains the below details:
GeneID as in PlasmoDB
Stages predicted: The stages where the geneid was obtained as per our prediction in Early Ring (ER), Late Ring (LR), Early Trophozoite (ET), Late Trophozoite (LT), Early Schizont (ES), Late Schizont (LS) and Merozoite (M)
Description of the gene
GO terms known for the geneID

## Sheet: Invasion_predicted
GeneID	Seed/Predicted	Stages Predicted	Description	GO
PF3D7_0817700	SEED	ER,LR,ET,LT,ES,LS,M	rhoptry neck protein 5 (RON5)	host cell surface binding|rhoptry
PF3D7_1452000	SEED	ER,LR,LT,ES,LS,M	rhoptry neck protein 2 (RON2)	membrane|rhoptry|protein binding
PF3D7_0323400	SEED	ER,LR,ES,LS,M	Rh5 interacting protein (RIPR)	membrane|integral to membrane|microneme|calcium ion binding|protein binding
PF3D7_0424100	SEED	ER,LR,ES,LS,M	reticulocyte binding protein homologue 5 (RH5)	entry into host|tight junction|rhoptry|protein binding|heparin binding|host cell surface receptor binding|cell-cell adhesion
PF3D7_0424200	SEED	ER,LR,LS,M	reticulocyte binding protein homologue 4 (RH4)	entry into host cell|rhoptry|apical part of cell|heparin binding|host cell surface receptor binding
PF3D7_0402300	SEED	ER,LR,ES,LS,M	reticulocyte binding protein homologue 1 (RH1)	cell-cell adhesion|apical complex|rhoptry|heparin binding|host cell surface receptor binding
PF3D7_1335300	SEED	ER,LT,ES,LS,M	reticulocyte binding protein 2 homologue b (RH2b)	entry into host cell|binding
PF3D7_1335400	SEED	ES,LS,M	reticulocyte binding protein 2 homologue a (RH2a)	entry into host cell|membrane
PF3D7_1028700	SEED	ER,LR,ET,LT,ES,LS,M	merozoite TRAP-like protein (MTRAP)	entry into host cell|cell surface|microneme
PF3D7_1335100	SEED	ER,LR,ET,LT,ES,LS,M	merozoite surface protein 7 (MSP7)	entry into host cell|membrane
PF3D7_1035500	SEED	ER,LR,ET,LT,ES,LS,M	merozoite surface protein 6 (MSP6)	entry into host cell
PF3D7_0930300	SEED	ER,LR,ET,LT,ES,LS,M	merozoite surface protein 1 (MSP1)	pathogenesis|membrane|anchored to plasma membrane|protein binding|attachment of GPI anchor to protein
PF3D7_0708400	SEED	ER,LR,ET,LT,ES,LS,M	heat shock protein 90 (HSP90)	protein folding|response to stress|response to unfolded protein|response to heat|protein binding|ATP binding|ATPase activity|unfolded protein binding
PF3D7_0102500	SEED	ER,LR,ET,ES,LS,M	erythrocyte binding antigen-181 (EBA181)	pathogenesis|cell-cell adhesion|entry into host cell|integral to membrane|microneme|receptor activity|heparin binding|sialic acid binding
PF3D7_0731500	SEED	ER,LR,ET,LT,ES,LS,M	erythrocyte binding antigen-175 (EBA175)	pathogenesis|entry into host cell|integral to membrane|microneme|receptor activity|heparin binding|host cell surface receptor binding
PF3D7_1301600	SEED	ER,LR,ET,LT,ES,LS,M	erythrocyte binding antigen-140 (EBA140)	pathogenesis|cell-cell adhesion|integral to membrane|microneme|receptor activity|host cell surface receptor binding
PF3D7_1133400	SEED	ER,LR,ET,LT,ES,LS,M	apical membrane antigen 1 (AMA1)	pathogenesis|entry into host cell|membrane|integral to membrane|apical complex|protein binding|host cell surface binding
PF3D7_1468400	PREDICTED	ER,ES,LS,M	zinc finger protein, putative (D13)	cytoplasm|nucleic acid binding|zinc ion binding
PF3D7_0818100	PREDICTED	ER,LR,LT,ES,LS,M	zinc finger protein, putative	nucleic acid binding|zinc ion binding|metal ion binding
PF3D7_1235200	PREDICTED	ET,LT	V-type K+-independent H+-translocating inorganic pyrophosphatase (VP2)	proton transport|membrane|inorganic diphosphatase activity|hydrogen-translocating pyrophosphatase activity
PF3D7_1243700	PREDICTED	ER,LR,ET,LT,ES,LS,M	ubiquitin-conjugating enzyme E2, putative	post-translational protein modification|regulation of protein metabolic process|acid-amino acid ligase activity|small conjugating protein ligase activity
PF3D7_1009700	PREDICTED	ER,LR,LT,ES,LS,M	tubulin--tyrosine ligase, putative	cellular protein modification process|tubulin-tyrosine ligase activity
PF3D7_0318700	PREDICTED	ER,LR,ET,ES,LS,M	trophozoite stage antigen
PF3D7_0420300	PREDICTED	ER,LR,ES	transcription factor with AP2 domain(s) (ApiAP2)	regulation of transcription, DNA-dependent|sequence-specific DNA binding transcription factor activity
PF3D7_1143100	PREDICTED	ER,LR,ES,LS,M	transcription factor with AP2 domain(s) (AP2-O)	regulation of transcription, DNA-dependent|sequence-specific DNA binding transcription factor activity
PF3D7_1218000	PREDICTED	ER,LR,ET,LT,ES,LS,M	thrombospondin-related apical membrane protein (TRAMP)	endoplasmic reticulum|Golgi apparatus|cell surface|rhoptry|protease binding
PF3D7_0919300	PREDICTED	ER,LR,LT,ES,LS,M	thioredoxin-like protein 1, putative (TrxL1)	microtubule associated complex
PF3D7_1241900	PREDICTED	ET,LT	tetratricopeptide repeat protein, putative	membrane|apicoplast|protein binding
PF3D7_0402200	PREDICTED	M	surface-associated interspersed protein 4.1 (SURFIN 4.1), pseudogene (SURF4.1)
PF3D7_0916000	PREDICTED	ER,LR,LT,ES,LS,M	sugar transporter, putative	transmembrane transport|integral to membrane
PF3D7_0507200	PREDICTED	LR,ET,LT	subtilisin-like protease 3 (SUB3)	proteolysis|apicoplast|serine-type endopeptidase activity|protein binding|subtilase activity
PF3D7_1136900	PREDICTED	ER,LR,ES,LS,M	subtilisin-like protease 2 (SUB2)	proteolysis|protein maturation|integral to membrane|microneme|merozoite dense granule|serine-type endopeptidase activity|serine-type peptidase activity
PF3D7_0507500	PREDICTED	ER,LR,ET,LT,ES,LS,M	subtilisin-like protease 1 (SUB1)	proteolysis|symbiont-containing vacuole|merozoite dense granule|serine-type endopeptidase activity|serine-type peptidase activity|subtilase activity
PF3D7_1304500	PREDICTED	ET	small heat shock protein, putative	response to unfolded protein|response to heat
PF3D7_1469200	PREDICTED	LT	shewanella-like protein phosphatase 1, putative (SHLP1)	endoplasmic reticulum|apicoplast|hydrolase activity|phosphatase activity
PF3D7_0508100	PREDICTED	LT	SET domain protein, putative (SET9)	nucleus|protein binding|zinc ion binding
PF3D7_1423300	PREDICTED	ER,LR,ES,LS,M	serine/threonine protein phosphatase 7 (PP7)	protein dephosphorylation|protein serine/threonine phosphatase activity|calcium ion binding|protein binding|hydrolase activity
PF3D7_1356800	PREDICTED	LS,M	serine/threonine protein kinase, putative (ARK3)	protein phosphorylation|cAMP-dependent protein kinase complex|protein kinase activity|protein serine/threonine kinase activity|protein tyrosine kinase activity|ATP binding
PF3D7_0214600	PREDICTED	LT,ES,LS,M	serine/threonine protein kinase, putative	protein phosphorylation|protein kinase activity|ATP binding|protein serine/threonine kinase activity
PF3D7_0207600	PREDICTED	LR,ET,LT	serine repeat antigen 5 (SERA5)	immunoglobulin production|proteolysis|regulation of immune response|symbiont-containing vacuole|cysteine-type peptidase activity
PF3D7_0207700	PREDICTED	ER,LT,ES,LS	serine repeat antigen 4 (SERA4)	immunoglobulin production|proteolysis|regulation of immune response|symbiont-containing vacuole|cysteine-type peptidase activity
PF3D7_0207800	PREDICTED	ER,LR,ET,LT,ES	serine repeat antigen 3 (SERA3)	immunoglobulin production|proteolysis|regulation of immune response|cysteine-type peptidase activity
PF3D7_1116100	PREDICTED	ER,LR,ET,LT,ES,LS,M	serine esterase, putative	food vacuole
PF3D7_0212600	PREDICTED	ER,LR,ET,ES,LS,M	secreted protein with altered thrombospondin repeat domain (SPATR)	cell-cell adhesion|cell surface|rhoptry|microneme
PF3D7_1310700	PREDICTED	ER,LR,ET,LT,ES,LS,M	RNA-binding protein, putative	nucleic acid binding
PF3D7_0102200	PREDICTED	ER,LR,ET,LT,ES,LS	ring-infected erythrocyte surface antigen (RESA)	regulation of immune response|host cell plasma membrane|symbiont-containing vacuole|merozoite dense granule|protein binding|heat shock protein binding
PF3D7_1149200	PREDICTED	ER,LR,ET,ES,LS,M	ring-infected erythrocyte surface antigen	protein folding|spectrin binding|heat shock protein binding|unfolded protein binding
PF3D7_1007300	PREDICTED	ER,ES,LS,M	RING zinc finger protein, putative	membrane|integral to membrane|protein binding|zinc ion binding|ubiquitin cycle
PF3D7_0501500	PREDICTED	ER,LR,LT,ES,LS,M	rhoptry-associated protein 3 (RAP3)	rhoptry
PF3D7_0501600	PREDICTED	ER,LR,ET,LT,ES,LS,M	rhoptry-associated protein 2 (RAP2)	entry into host cell|rhoptry
PF3D7_1410400	PREDICTED	ER,LR,ET,LT,ES,LS,M	rhoptry-associated protein 1 (RAP1)	rhoptry
PF3D7_0707300	PREDICTED	ER,LR,ES	rhoptry-associated membrane antigen (RAMA)	cell-cell adhesion|endoplasmic reticulum|Golgi apparatus|symbiont-containing vacuole|rhoptry|anchored to membrane|membrane raft|attachment of GPI anchor to protein
PF3D7_0722200	PREDICTED	ER,LR,LT,ES,LS,M	rhoptry-associated leucine zipper-like protein 1 (RALP1)	host cell surface receptor binding|rhoptry|protein binding
PF3D7_0613300	PREDICTED	ER,ES,LS	rhoptry protein ROP14 (ROP14)	rhoptry|integral to membrane
PF3D7_0214900	PREDICTED	LT,ES,LS,M	rhoptry neck protein 6 (RON6)	entry into host|rhoptry
PF3D7_1017100	PREDICTED	ER,LR,LT,ES,LS	rhoptry neck protein 12 (RON12)	membrane|apicoplast
PF3D7_0506900	PREDICTED	ER,LR,ET,LT,ES,LS,M	rhomboid protease ROM4 (ROM4)	signal peptide processing|proteolysis|integral to membrane|serine-type endopeptidase activity|peptidase activity
PF3D7_1007200	PREDICTED	ER,ET,LT,ES,LS,M	rhoGAP GTPase, putative	signal transduction|Rho protein signal transduction|intracellular|membrane|apicoplast|GTPase activator activity|Rho GTPase activator activity
PF3D7_1252400	PREDICTED	ER,LR,ES,LS,M	reticulocyte binding protein homologue 3, pseudogene (RH3)
PF3D7_0418600	PREDICTED	LT,ES,LS,M	regulator of chromosome condensation, putative	cell cycle|nucleus|cytoplasm|guanyl-nucleotide exchange factor activity|protein binding
PF3D7_0810300	PREDICTED	LR,ET,LT	protein phosphatase PPM5, putative (PPM5)	protein dephosphorylation|nucleus|catalytic activity|protein serine/threonine phosphatase activity|cation binding
PF3D7_0932100	PREDICTED	LT	protein MAM3, putative	transport|plasma membrane|integral to membrane|protein binding
PF3D7_1238900	PREDICTED	ER,LR,ES,LS,M	protein kinase 2 (PK2)	protein phosphorylation|membrane fraction|protein kinase activity|calmodulin-dependent protein kinase activity|protein tyrosine kinase activity|calcium ion binding|calmodulin binding|ATP binding
PF3D7_1472600	PREDICTED	ER,LR,LT,ES,LS,M	protein disulfide-isomerase (PDI-14)	protein folding|cell redox homeostasis|endoplasmic reticulum|protein disulfide isomerase activity
PF3D7_0932200	PREDICTED	ET,LT	profilin, putative (PFN)	cytoskeleton organization|actin cytoskeleton organization|actin cytoskeleton|actin binding|protein binding
PF3D7_1035900	PREDICTED	ER,LR,ES,LS,M	probable protein, unknown function (M566)	protein folding|protein transport|RNA binding
PF3D7_1035100	PREDICTED	LR,ET,LT	probable protein, unknown function	nucleus|ATP binding
PF3D7_1036500	PREDICTED	ER,LR,ES,LS,M	probable protein, unknown function	transcription, DNA-dependent|nucleus|ATP binding
PF3D7_1204900	PREDICTED	ER,LR,LT,ES,LS,M	probable protein, unknown function	transport|integral to membrane|apicoplast
PF3D7_0919200	PREDICTED	ER,LR,ET,LT,ES,LS,M	PPPDE peptidase, putative
PF3D7_1401600	PREDICTED	ER,LR,ES,LS,M	Plasmodium exported protein (PHISTb), unknown function	cytoplasm
PF3D7_0808200	PREDICTED	ER,LR,ES,LS,M	plasmepsin X	proteolysis|aspartic-type endopeptidase activity|pepsin A activity
PF3D7_1430200	PREDICTED	ER,LR,ET,LT	plasmepsin IX	proteolysis|aspartic-type endopeptidase activity
PF3D7_0109000	PREDICTED	ER,LR,ET,LT,ES,LS,M	photosensitized INA-labeled protein PHIL1, putative (PHIL1)	inner membrane complex
PF3D7_1022700	PREDICTED	ER,LR,ET,LT,ES,LS,M	phospholipid scramblase, putative
PF3D7_0629300	PREDICTED	ES,LS	phospholipase, putative (PL)	lipid metabolic process|entry into host cell|exit from host cell|cell surface|symbiont-containing vacuole membrane|phosphatidylcholine-sterol O-acyltransferase activity|phospholipase activity|O-acyltransferase activity|lipase activity|hydrolase activity
PF3D7_1027300	PREDICTED	ER,LR,LT,ES,LS,M	peroxiredoxin (nPrx)	entry into host cell|oxidation-reduction process|nucleus|antioxidant activity|oxidoreductase activity
PF3D7_0206200	PREDICTED	ER,LR,ET,LT,ES,LS,M	pantothenate transporter (PAT)	pantothenate transmembrane transport|transmembrane transport|plasma membrane|integral to membrane|pantothenate transmembrane transporter activity
PF3D7_0609800	PREDICTED	LR,LT	palmitoyltransferase, putative (DHHC2)	protein palmitoylation|zinc ion binding|palmitoyltransferase activity|integral to membrane|nucleic acid binding
PF3D7_0528400	PREDICTED	ER,LR,LT,ES,LS,M	palmitoyltransferase (DHHC7)	protein palmitoylation|entry into host cell|rhoptry|zinc ion binding|palmitoyltransferase activity
PF3D7_1412000	PREDICTED	ER,LR,ES,LS,M	p1/s1 nuclease, putative	DNA catabolic process|nucleic acid binding|nuclease activity|endonuclease activity
PF3D7_1031400.2	PREDICTED	LR,LT	OTU-like cysteine protease, putative	membrane
PF3D7_1118700	PREDICTED	LS	myosin light chain B (MLC-B)	cytoplasm|myosin complex|motor activity|actin binding|ATP binding
PF3D7_0613900	PREDICTED	ER,LT,ES,LS,M	myosin E, putative (myoE)	myosin complex|motor activity|actin binding|ATP binding
PF3D7_1229800	PREDICTED	ES,LS,M	myosin D (MyoD)	actin filament organization|actin filament-based movement|myosin complex|microfilament motor activity|motor activity|ATP binding
PF3D7_0503600	PREDICTED	ER,LR,ES,LS,M	myosin B (MyoB)	myosin complex|symbiont-containing vacuole membrane|apical part of cell|motor activity|actin binding|protein binding|ATP binding
PF3D7_1246400	PREDICTED	ER,LR,ET,LT,ES,LS,M	myosin A tail domain interacting protein (MTIP)	inner membrane complex
PF3D7_1342600	PREDICTED	ER,LR,ET,LT,ES,LS,M	myosin A (MyoA)	plasma membrane|myosin complex|pellicle|inner membrane complex|motor activity|actin binding|ATP binding
PF3D7_1334800	PREDICTED	ER,LR,ET,LT	MSP7-like protein (MSRP2)
PF3D7_1031200	PREDICTED	ER,LR,ET,LT,ES,LS,M	MORN repeat-containing protein 1 (MORN1)
PF3D7_0316000	PREDICTED	ER,LR,ES,LS,M	microneme associated antigen (MA)	cell-cell adhesion|entry into host cell|microneme|host cell surface binding|ATP binding
PF3D7_1228600	PREDICTED	LR,ET,LT	merozoite surface protein 9 (MSP9)	membrane|symbiont-containing vacuole
PF3D7_0207000	PREDICTED	ER,LR,ES,LS	merozoite surface protein 4 (MSP4)	integral to membrane|anchored to plasma membrane
PF3D7_1035400	PREDICTED	ER,LR,LT,ES,LS,M	merozoite surface protein 3 (MSP3)	entry into host cell
PF3D7_0206800	PREDICTED	LR,LS,M	merozoite surface protein 2 (MSP2)	cell adhesion|integral to plasma membrane|integral to membrane|anchored to plasma membrane|attachment of GPI anchor to protein
PF3D7_0620400	PREDICTED	ER,LR,ES,LS,M	merozoite surface protein 10 (MSP10)	anchored to plasma membrane|attachment of GPI anchor to protein|integral to membrane
PF3D7_1036000	PREDICTED	ER,LR,LT,ES,LS,M	merozoite surface protein (MSP11)	cell surface|extrinsic to membrane
PF3D7_1035600	PREDICTED	ER,ES,LS,M	merozoite surface protein (H101)
PF3D7_1036300	PREDICTED	ES	merozoite surface protein (DBLMSP2)	pathogenesis|integral to membrane|receptor activity
PF3D7_1125700	PREDICTED	ER,LR,LT,ES,LS,M	kelch protein, putative
PF3D7_1125800	PREDICTED	ER,LR,ET,LT,ES,LS,M	kelch protein, putative
PF3D7_1341500	PREDICTED	LT	inner membrane complex suture component, putative (ISC1)
PF3D7_1460600	PREDICTED	ES,LS,M	inner membrane complex sub-compartment protein 3 (ISP3)	inner membrane complex
PF3D7_0525800	PREDICTED	ER,LR,ET,LT,ES,LS,M	inner membrane complex protein 1g, putative (IMC1g)	inner membrane complex
PF3D7_1351700	PREDICTED	ER,LR,LT,ES,LS,M	inner membrane complex protein 1f, putative (IMC1f)	inner membrane complex|transferase activity
PF3D7_0304100	PREDICTED	ER,LR,LT,ES,LS,M	inner membrane complex protein 1e, putative (IMC1e)	inner membrane complex
PF3D7_1003600	PREDICTED	ER,LR,ET,LT,ES,LS,M	inner membrane complex protein 1c, putative (IMC1c)	cytoskeleton organization|subpellicular network|inner membrane complex
PF3D7_1345600	PREDICTED	LR,ET,LT	inner membrane complex protein	inner membrane complex
PF3D7_0522600	PREDICTED	ET,LT	inner membrane complex protein	magnesium ion transport|membrane|integral to membrane|inner membrane complex|magnesium ion transmembrane transporter activity
PF3D7_0905400	PREDICTED	ER,LR,ET,LT,ES,LS,M	high molecular weight rhoptry protein 3 (RhopH3)	entry into host cell|rhoptry|protein binding
PF3D7_0929400	PREDICTED	LR,ET,LT	high molecular weight rhoptry protein 2 (RhopH2)	rhoptry
PF3D7_0628100	PREDICTED	LT,ES,LS,M	HECT-domain (ubiquitin-transferase), putative	cellular protein modification process|intracellular|ubiquitin-protein ligase activity|protein binding|acid-amino acid ligase activity
PF3D7_0828800	PREDICTED	ER,LR,ES,LS,M	GPI-anchored micronemal antigen (GAMA)	cytoplasm|microneme|extrinsic to cell outer membrane|anchored to plasma membrane|host cell surface binding|attachment of GPI anchor to protein
PF3D7_1035300	PREDICTED	ER,LR,ET,ES,LS,M	glutamate-rich protein (GLURP)
PF3D7_0918000	PREDICTED	ET	glideosome-associated protein 50 (GAP50)	endoplasmic reticulum|plasma membrane|inner membrane complex|protein binding|hydrolase activity|protein anchor
PF3D7_1222700	PREDICTED	ER,LR,ET,LT,ES,LS,M	glideosome-associated protein 45 (GAP45)	extrinsic to membrane|host cell membrane|inner membrane complex
PF3D7_0515700	PREDICTED	ET,LT	glideosome-associated protein 40, putative (GAP40)	inner membrane complex
PF3D7_1406800	PREDICTED	ER,LR,ET,LT,ES,LS,M	glideosome associated protein with multiple membrane spans 3 (GAPM3)	membrane|integral to membrane|inner membrane complex
PF3D7_0423500	PREDICTED	ER,LR,ET,LT	glideosome associated protein with multiple membrane spans 2 (GAPM2)	transport|membrane|integral to membrane|actomyosin, actin part|inner membrane complex|protein binding|metal ion binding
PF3D7_1323700	PREDICTED	ER,LR,ET,LT,ES,M	glideosome associated protein with multiple membrane spans 1 (GAPM1)	plasma membrane|integral to membrane|actomyosin, actin part|inner membrane complex|protein binding
PF3D7_0805200	PREDICTED	ER,LR,ET,LT,ES,LS,M	gamete release protein, putative (GAMER)	cell motility|cytoplasm|inner membrane complex
PF3D7_0803200	PREDICTED	LT	filament assembling protein, putative	structural constituent of cytoskeleton
PF3D7_0424300	PREDICTED	ER,ES,LS,M	erythrocyte binding antigen-165, pseudogene (EBA165)	pathogenesis|integral to membrane|receptor activity|binding
PF3D7_1037500	PREDICTED	LR,ES	dynamin-like protein (DYN2)	receptor-mediated endocytosis|microtubule-based process|endoplasmic reticulum|Golgi apparatus|microtubule associated complex|apicoplast|microtubule motor activity|GTPase activity|GTP binding
PF3D7_1035700	PREDICTED	ER,LR,LT,ES,LS,M	duffy binding-like merozoite surface protein (DBLMSP)	pathogenesis|cell-cell adhesion|cell surface|integral to membrane|receptor activity
PF3D7_1413900	PREDICTED	ET	DnaJ protein, putative	protein folding|membrane|heat shock protein binding|unfolded protein binding
PF3D7_1002800	PREDICTED	ET,LT	DnaJ protein, putative	membrane|heat shock protein binding|protein folding|unfolded protein binding
PF3D7_0823800	PREDICTED	ET,LT	DnaJ protein, putative	cell redox homeostasis|nucleotide binding|nucleic acid binding|DNA-directed DNA polymerase activity|heat shock protein binding|protein folding|unfolded protein binding
PF3D7_0629200	PREDICTED	ET	DnaJ protein, putative	protein folding|response to unfolded protein|response to heat|apicoplast|heat shock protein binding|unfolded protein binding
PF3D7_0404700	PREDICTED	ER,LR,ES,LS,M	dipeptidyl aminopeptidase 3 (DPAP3)	proteolysis|protein catabolic process|apicoplast|cysteine-type peptidase activity
PF3D7_0831600	PREDICTED	ER,LR,LT,ES,LS	cytoadherence linked asexual protein 8 (CLAG8)
PF3D7_0302200	PREDICTED	ER,LR,ET,LT,ES,LS,M	cytoadherence linked asexual protein 3.2 (CLAG3.2)	cytoadherence to microvasculature, mediated by symbiont protein|host cell plasma membrane|rhoptry|cell adhesion molecule binding
PF3D7_0302500	PREDICTED	ER,LR,ET,LT,ES,LS,M	cytoadherence linked asexual protein 3.1 (CLAG3.1)	cytoadherence to microvasculature, mediated by symbiont protein|host cell plasma membrane|rhoptry|cell adhesion molecule binding
PF3D7_0220800	PREDICTED	ER,LR,LT,ES,LS	cytoadherence linked asexual protein 2 (CLAG2)	rhoptry
PF3D7_0423800	PREDICTED	ER,LR,LT,ES,LS,M	cysteine-rich protective antigen (CyRPA)	entry into host cell|microneme|apical part of cell|anchored to plasma membrane|protein binding
PF3D7_1251200	PREDICTED	ER,LR,ET,LT,ES,LS,M	coronin	cytokinesis|cellular component movement|microtubule-based process|actin binding|protein binding
PF3D7_1344300	PREDICTED	ER,LR,ET,LT,ES,LS	conserved protein, unknown function	integral to membrane|protein binding|zinc ion binding|ligase activity
PF3D7_0414800	PREDICTED	ER,M	conserved Plasmodium protein, unknown function
PF3D7_0308100	PREDICTED	LT	conserved Plasmodium protein, unknown function	intracellular|cytoplasm|zinc ion binding
PF3D7_0932000	PREDICTED	ER,LR,ET,LT,ES,LS,M	conserved Plasmodium protein, unknown function	membrane|integral to membrane
PF3D7_0508900	PREDICTED	LT	conserved Plasmodium protein, unknown function	cytoplasm|myosin complex|motor activity|actin binding|ATP binding
PF3D7_1455300	PREDICTED	ER,LR,ET,LT,ES,LS,M	conserved Plasmodium protein, unknown function	mismatch repair|DNA recombination|response to DNA damage stimulus|nucleus|DNA binding|single-stranded DNA specific 5'-3' exodeoxyribonuclease activity|flap endonuclease activity
PF3D7_0207100	PREDICTED	ER,LR,LT,ES,LS,M	conserved Plasmodium protein, unknown function
PF3D7_1014100	PREDICTED	ER,LR,ES,LS,M	conserved Plasmodium protein, unknown function	membrane|apicoplast
PF3D7_1012200	PREDICTED	ER,LR,LT,ES,LS,M	conserved Plasmodium protein, unknown function	nucleus|membrane|apicoplast
PF3D7_0704800	PREDICTED	ET,LT	conserved Plasmodium protein, unknown function	catalytic activity
PF3D7_0408000	PREDICTED	ER,LR,ES,LS	conserved Plasmodium protein, unknown function
PF3D7_0621100	PREDICTED	ER,LR,ES	conserved Plasmodium protein, unknown function	cytoplasm
PF3D7_1137200	PREDICTED	M	conserved Plasmodium protein, unknown function	DNA-dependent DNA replication|intracellular|cytoplasm|DNA binding|DNA-directed DNA polymerase activity|3'-5' exonuclease activity|nucleotidyltransferase activity
PF3D7_1320700	PREDICTED	LT	conserved Plasmodium protein, unknown function	cytoplasm|myosin complex|motor activity|actin binding|calmodulin binding|ATP binding
PF3D7_0407800	PREDICTED	ER,LR,ET,LT,ES,LS,M	conserved Plasmodium protein, unknown function	membrane
PF3D7_0203200	PREDICTED	ER,LR,ES,LS,M	conserved Plasmodium protein, unknown function
PF3D7_0515400	PREDICTED	ER,ES,LS,M	conserved Plasmodium protein, unknown function
PF3D7_0811600	PREDICTED	LT	conserved Plasmodium protein, unknown function	cytoplasm|ATP binding
PF3D7_0805300	PREDICTED	ER,LR,LS,M	conserved Plasmodium protein, unknown function	plasma membrane|zinc ion binding|metal ion binding|N-acetylgalactosaminyl-proteoglycan 3-beta-glucuronosyltransferase activity|intracellular
PF3D7_0920700	PREDICTED	ER,LR,ES,LS,M	conserved Plasmodium protein, unknown function	lipid transport|cytoplasm|endoplasmic reticulum|endoplasmic reticulum membrane|microsome
PF3D7_0905500	PREDICTED	LR,ET,LT	conserved Plasmodium protein, unknown function	transport|membrane|integral to membrane|metal ion binding
PF3D7_0913800	PREDICTED	ER,LR,ET,LT,ES,LS,M	conserved Plasmodium protein, unknown function	cytoplasm
PF3D7_0908500	PREDICTED	ES,LS	conserved Plasmodium protein, unknown function
PF3D7_0423300	PREDICTED	LT,ES,LS,M	conserved Plasmodium protein, unknown function	translation|translational initiation|intracellular|cytoplasm|apicoplast|translation initiation factor activity|GTPase activity|GTP binding
PF3D7_0507300	PREDICTED	LR,ES,LS,M	conserved Plasmodium protein, unknown function
PF3D7_0318500	PREDICTED	LS	conserved Plasmodium protein, unknown function
PF3D7_0614700	PREDICTED	ES	conserved Plasmodium protein, unknown function	protein binding
PF3D7_0914100	PREDICTED	ES,LS,M	conserved Plasmodium protein, unknown function	cytoplasm|motor activity|ATP binding|protein binding
PF3D7_1206300	PREDICTED	LS	conserved Plasmodium protein, unknown function	cytoplasm|motor activity|actin binding|calmodulin binding|ATP binding
PF3D7_1026600	PREDICTED	ER,LR,ES,LS,M	conserved Plasmodium protein, unknown function	phosphate ion transport|extracellular region|cytoplasm|structural molecule activity
PF3D7_1461400	PREDICTED	ER,LR,LT,ES,LS,M	conserved Plasmodium protein, unknown function
PF3D7_0404000	PREDICTED	LR	conserved Plasmodium protein, unknown function
PF3D7_0822900	PREDICTED	ER,LR,ES,LS,M	conserved Plasmodium protein, unknown function	nucleus
PF3D7_1224100	PREDICTED	ET,LT	conserved Plasmodium protein, unknown function
PF3D7_1029900	PREDICTED	ER,LT	conserved Plasmodium protein, unknown function	DNA replication|nuclear origin of replication recognition complex|cytoplasm|DNA binding
PF3D7_1236900	PREDICTED	ER,LT,ES	conserved Plasmodium protein, unknown function	membrane
PF3D7_1435600	PREDICTED	ES,LS,M	conserved Plasmodium protein, unknown function	cytoplasm|myosin complex|motor activity|actin binding|calmodulin binding|ATP binding
PF3D7_1437300	PREDICTED	LT	conserved Plasmodium protein, unknown function	cytoplasm|ATP binding
PF3D7_1310200	PREDICTED	ER,LR,ES,LS,M	conserved Plasmodium protein, unknown function	membrane|integral to membrane|apicoplast
PF3D7_0934600	PREDICTED	ER,LR,ES,LS,M	conserved Plasmodium protein, unknown function	translation|ribosome|structural constituent of ribosome
PF3D7_1231200	PREDICTED	ER,M	conserved Plasmodium protein, unknown function	ATP binding
PF3D7_1013800	PREDICTED	ER,LR,ET,LT,ES,LS,M	conserved Plasmodium protein, unknown function	nucleus|membrane
PF3D7_0528300	PREDICTED	ER,LR,ES,LS	conserved Plasmodium protein, unknown function	nucleus|cytoplasm|metal ion binding
PF3D7_0611600	PREDICTED	LT	conserved Plasmodium protein, unknown function
PF3D7_0105400.2	PREDICTED	LR,LT	conserved Plasmodium protein, unknown function	membrane|integral to membrane
PF3D7_1136200	PREDICTED	ER,LR,LT,ES	conserved Plasmodium protein, unknown function	attachment of GPI anchor to protein|membrane
PF3D7_1404700	PREDICTED	ES,LS	conserved Plasmodium protein, unknown function
PF3D7_1361800	PREDICTED	ER,LR,ET,LT,ES,LS,M	conserved Plasmodium protein, unknown function	cytoplasm|binding|protein binding
PF3D7_0918700	PREDICTED	ER,LR,ES,LS,M	conserved Plasmodium protein, unknown function	cytoplasm|membrane|nucleotide binding
PF3D7_1030200	PREDICTED	ER,LR,ET,LT,ES,LS,M	conserved Plasmodium protein, unknown function	nucleus|cytoplasm|membrane|nucleotide binding
PF3D7_0214700	PREDICTED	ES,LS	conserved Plasmodium protein, unknown function	membrane
PF3D7_0308300	PREDICTED	ER,LR,ES,LS,M	conserved Plasmodium protein, unknown function	ATP binding
PF3D7_0620300	PREDICTED	ES,LS	conserved Plasmodium protein, unknown function	membrane
PF3D7_1128900	PREDICTED	LR	conserved Plasmodium protein, unknown function
PF3D7_1017500	PREDICTED	ER,LR,ET,LT,ES,LS,M	conserved Plasmodium protein, unknown function
PF3D7_0723300	PREDICTED	LT,ES,LS,M	conserved Plasmodium protein, unknown function	transcription, DNA-dependent|regulation of transcription, DNA-dependent|intracellular|nucleus|DNA binding|zinc ion binding
PF3D7_1016000	PREDICTED	ER,LR,ES,LS,M	conserved Plasmodium protein, unknown function	cytoplasm|plasma membrane|protein binding|ATP binding
PF3D7_1117400	PREDICTED	LR	conserved Plasmodium protein, unknown function	membrane
PF3D7_1003400	PREDICTED	ES	conserved Plasmodium protein, unknown function	membrane|myosin complex|motor activity|actin binding|calmodulin binding|ATP binding
PF3D7_0725400	PREDICTED	ER,LR,ET,LT,ES,LS,M	conserved Plasmodium protein, unknown function	apicoplast
PF3D7_0911100	PREDICTED	ER,LR,ES,LS,M	conserved Plasmodium protein, unknown function	translation|translational initiation|intracellular|cytoplasm|translation initiation factor activity|GTPase activity|GTP binding
PF3D7_0525300	PREDICTED	LR,LT,ES,LS,M	conserved Plasmodium protein, unknown function
PF3D7_1223000	PREDICTED	LT	conserved Plasmodium protein, unknown function	cytoplasm|membrane|nucleotide binding
PF3D7_0210600	PREDICTED	ER,LR,ET,LT,ES,LS,M	conserved Plasmodium protein, unknown function
PF3D7_1140400	PREDICTED	ER,LR,ET,LT,ES,LS	conserved Plasmodium protein, unknown function
PF3D7_0817600	PREDICTED	ER,LR,ES,LS,M	conserved Plasmodium protein, unknown function
PF3D7_1327300	PREDICTED	ER,LR,ES,LS,M	conserved Plasmodium protein, unknown function	cytoplasm|myosin complex|motor activity|actin binding|calmodulin binding|ATP binding
PF3D7_0507400	PREDICTED	ER,LR,ES,LS,M	conserved Plasmodium protein, unknown function	cytoplasm
PF3D7_1318700	PREDICTED	LR	conserved Plasmodium protein, unknown function	cytoplasm|ATP binding
PF3D7_1436200	PREDICTED	M	conserved Plasmodium protein, unknown function
PF3D7_1307500	PREDICTED	ER,LR,ES,LS,M	conserved Plasmodium protein, unknown function	cytoplasm|apicoplast
PF3D7_1332200	PREDICTED	ER,LR,ET,ES,LS,M	conserved Plasmodium protein, unknown function	translational initiation|intracellular|cytoplasm|translation initiation factor activity|GTPase activity|GTP binding
PF3D7_1318000	PREDICTED	LR	conserved Plasmodium membrane protein, unknown function	membrane|integral to membrane
PF3D7_1409400	PREDICTED	ER,LR,ET,LT,ES,M	conserved Plasmodium membrane protein, unknown function	integral to membrane
PF3D7_0917300	PREDICTED	LT	conserved Plasmodium membrane protein, unknown function	membrane|integral to membrane
PF3D7_0704100	PREDICTED	LT	conserved Plasmodium membrane protein, unknown function	translation|translational initiation|intracellular|cytoplasm|translation initiation factor activity|GTPase activity|GTP binding
PF3D7_1308000	PREDICTED	LR	conserved Plasmodium membrane protein, unknown function	proteolysis|plasma membrane|integral to membrane|serine-type endopeptidase activity|protein binding|peptidase activity
PF3D7_0618000	PREDICTED	ER,LR,ES,LS,M	conserved Plasmodium membrane protein, unknown function
PF3D7_1463900	PREDICTED	ER,LR,ES,LS	conserved Plasmodium membrane protein, unknown function	apicoplast
PF3D7_1459900	PREDICTED	ER,LR,LT	conserved Plasmodium membrane protein, unknown function	integral to membrane|nucleotidyltransferase activity
PF3D7_1025400	PREDICTED	ET	conserved Plasmodium membrane protein, unknown function
PF3D7_1313500	PREDICTED	LR	conserved Plasmodium membrane protein, unknown function	lipid catabolic process|extracellular region|membrane|triglyceride lipase activity|hydrolase activity
PF3D7_1334200	PREDICTED	ET,LT	chaperone binding protein, putative	protein folding|nucleus|cytoplasm|ATPase activator activity|peptidyl-prolyl cis-trans isomerase activity|protein binding|chaperone binding
PF3D7_1436600	PREDICTED	ER,LR,LT,ES,LS,M	cGMP-dependent protein kinase (PKG)	regulation of protein phosphorylation|protein phosphorylation|peripheral to membrane of membrane fraction|cytoplasm|endoplasmic reticulum|cAMP-dependent protein kinase complex|protein kinase activity|protein serine/threonine kinase activity|cGMP-dependent protein kinase activity|protein tyrosine kinase activity|ATP binding|cAMP-dependent protein kinase regulator activity
PF3D7_1232500	PREDICTED	ER,LR,ET,LT,ES,M	CG2-related protein, putative	transferase activity
PF3D7_1146600	PREDICTED	ER,LR,ES,LS	CCAAT-box DNA binding protein subunit B (NFYB)	regulation of transcription, DNA-dependent|intracellular|nucleus|DNA binding|sequence-specific DNA binding|protein heterodimerization activity
PF3D7_1439500	PREDICTED	LR,ES	CCAAT-binding transcription factor, putative	intracellular|CCAAT-binding factor complex|sequence-specific DNA binding|protein heterodimerization activity
PF3D7_1223100	PREDICTED	ET,LT	cAMP-dependent protein kinase regulatory subunit (PKAr)	regulation of protein phosphorylation|cAMP-dependent protein kinase complex|cAMP-dependent protein kinase regulator activity
PF3D7_0934800	PREDICTED	ER,LR,ET,LT	cAMP-dependent protein kinase catalytic subunit (PKAc)	protein phosphorylation|cell differentiation|protein kinase activity|protein serine/threonine kinase activity|protein tyrosine kinase activity|protein binding|ATP binding
PF3D7_1434200	PREDICTED	LR,LT	calmodulin (CAM)	calcium ion binding|enzyme binding
PF3D7_1104900	PREDICTED	LT,ES,LS,M	calcium/calmodulin-dependent protein kinase, putative	protein phosphorylation|protein kinase activity|protein serine/threonine kinase activity|ATP binding
PF3D7_1337800	PREDICTED	ER,LR,ES,LS,M	calcium-dependent protein kinase 5 (CDPK5)	protein phosphorylation|protein kinase activity|protein serine/threonine kinase activity|calmodulin-dependent protein kinase activity|protein tyrosine kinase activity|calcium ion binding|ATP binding
PF3D7_0717500	PREDICTED	ER,LR,ET,LT,ES,LS,M	calcium-dependent protein kinase 4 (CDPK4)	protein phosphorylation|catalytic activity|protein kinase activity|protein tyrosine kinase activity|calcium-dependent protein serine/threonine phosphatase activity|calcium ion binding|ATP binding|protein serine/threonine kinase activity
PF3D7_0217500	PREDICTED	ER,LR,ET,LT,ES,LS,M	calcium-dependent protein kinase 1 (CDPK1)	protein phosphorylation|response to drug|plasma membrane|membrane|protein kinase activity|protein serine/threonine kinase activity|protein tyrosine kinase activity|calcium ion binding|ATP binding|calcium-dependent protein serine/threonine kinase activity
PF3D7_1126700	PREDICTED	ER,LR,ES,LS,M	autophagy-related protein 23, putative (ATG23)	cytoplasm|myosin complex|motor activity|actin binding|calmodulin binding|ATP binding
PF3D7_0414900	PREDICTED	ER,LR,ET,LT,ES,LS,M	armadillo-domain containing rhoptry protein (ARO)	rhoptry|anchored to membrane|binding
PF3D7_1132800	PREDICTED	ET	aquaglyceroporin (AQP)	transport|water transport|glycolipid biosynthetic process|polyol transport|glucosylglycerol transport|membrane|perinuclear region of cytoplasm|transporter activity|ammonia transmembrane transporter activity
PF3D7_0405900	PREDICTED	ER,LR,ES,LS,M	apical sushi protein (ASP)	anchored to plasma membrane|binding|attachment of GPI anchor to protein|rhoptry
PF3D7_0419700	PREDICTED	ER,LR,LT,ES,LS,M	apical merozoite protein (Pf34)	rhoptry|anchored to plasma membrane|attachment of GPI anchor to protein
PF3D7_1423100	PREDICTED	ES,LS	ankyrin, putative	protein binding
PF3D7_0403800	PREDICTED	ER,LR,LT,ES,LS,M	alpha/beta hydrolase, putative	hydrolase activity
PF3D7_0405200	PREDICTED	LR,M	ag-1 blood stage membrane protein homologue (MAg-1)
PF3D7_0920500	PREDICTED	ES	ADP-ribosylation factor, putative	small GTPase mediated signal transduction|intracellular|GTP binding
PF3D7_1316200	PREDICTED	ER,LR,LT,ES	ADP-ribosylation factor, putative	transport|intracellular protein transport|small GTPase mediated signal transduction|vesicle-mediated transport|intracellular|Golgi apparatus|nucleotide binding|GTPase activity|GTP binding
PF3D7_0802600	PREDICTED	ER,LR,ET,LT,ES,LS,M	adenylyl cyclase beta (ACbeta)	cGMP biosynthetic process|protein phosphorylation|cyclic nucleotide biosynthetic process|response to pH|intracellular signal transduction|cytoplasm|adenylate cyclase activity|guanylate cyclase activity|protein kinase activity|receptor activity|ATP binding|phosphorus-oxygen lyase activity|membrane|integral to membrane
PF3D7_0308500	PREDICTED	LT	activator of Hsp90 ATPase, putative	response to stress
PF3D7_1361400	PREDICTED	ET	actin-depolymerizing factor 2 (ADF2)	actin polymerization or depolymerization|actin cytoskeleton organization|cytoplasmic actin-based contraction involved in cell motility|intracellular|actin cytoskeleton|actin binding|actin monomer binding|actin filament binding
PF3D7_0503400	PREDICTED	ET	actin-depolymerizing factor 1 (ADF1)	actin cytoskeleton organization|actin filament depolymerization|actin filament severing|cytoplasmic actin-based contraction involved in cell motility|intracellular|cytosol|actin cytoskeleton|actin binding|actin monomer binding|actin filament binding
PF3D7_1246200	PREDICTED	ET,LT	actin I (ACT1)	cytoskeleton organization|actin filament|structural constituent of cytoskeleton|protein binding
PF3D7_0803500	PREDICTED	LR,ES,M	AAA family ATPase, putative	nucleotide binding|ATP binding|nucleoside-triphosphatase activity
PF3D7_0404900	PREDICTED	LR,ET,LT	6-cysteine protein (P41)	cell surface|symbiont-containing vacuolar space|anchored to plasma membrane|protein binding
PF3D7_0508000	PREDICTED	LR,LT	6-cysteine protein (P38)	anchored to plasma membrane|attachment of GPI anchor to protein
PF3D7_0612700	PREDICTED	ER,LR,ET,LT,ES,LS,M	6-cysteine protein (P12)	entry into host cell|cell surface|symbiont-containing vacuolar space|apical part of cell|anchored to plasma membrane|protein binding|attachment of GPI anchor to protein

## Sheet: Maurer's Clefts prediction
GeneID	Seed/Predicted	Stages Predicted	Description	GO
PF3D7_1456800	SEED	ER,LR,ET,LT,ES,LS,M	V-type H(+)-translocating pyrophosphatase, putative (VP1)	regulation of pH|proton transport|membrane|food vacuole|inorganic diphosphatase activity|hydrogen-translocating pyrophosphatase activity|hydrogen ion transmembrane transporter activity
PF3D7_0603400	SEED	LT	trophozoite exported protein 1 (TEX1)	Maurer's cleft|protein binding|zinc ion binding
PF3D7_1439900	SEED	ER,LR,ET,LT,ES,LS,M	triosephosphate isomerase (TIM)	gluconeogenesis|glycolysis|pentose-phosphate shunt|fatty acid biosynthetic process|metabolic process|triose-phosphate isomerase activity
PF3D7_1437800	SEED	ER,LR,ET,LT,ES,LS	trafficking protein particle complex subunit 5, putative (TRAPPC5)	host cell plasma membrane
PF3D7_0416800	SEED	ER,LR,ET,LT,ES,LS,M	small GTP-binding protein sar1 (SAR1)	intracellular protein transport|small GTPase mediated signal transduction|intracellular|endoplasmic reticulum|Maurer's cleft|GTP binding
PF3D7_0702400	SEED	ER,LR,ET,LT,ES,LS,M	small exported membrane protein 1 (SEMP1)	Maurer's cleft|host cell cytoplasm|host cell membrane|protein binding|cytoplasm
PF3D7_0501300	SEED	ER,LR,ET,LT,ES,LS,M	skeleton-binding protein 1 (SBP1)	protein transport|integral to membrane|symbiont-containing vacuole membrane|Maurer's cleft|protein binding
PF3D7_0406200	SEED	ER,LR,ET,LT,ES,LS,M	sexual stage-specific protein precursor (Pfs16)	integral to membrane|symbiont-containing vacuole membrane
PF3D7_1414400	SEED	ER,LR,ET,LT,ES,LS,M	serine/threonine protein phosphatase PP1 (PP1)	protein dephosphorylation|protein serine/threonine phosphatase activity|hydrolase activity
PF3D7_0207500	SEED	ER,LT,ES,LS	serine repeat antigen 6 (SERA6)	immunoglobulin production|proteolysis|regulation of immune response|symbiont-containing vacuole|cysteine-type peptidase activity
PF3D7_0207600	SEED	ER,LR,ET,LT,ES,LS,M	serine repeat antigen 5 (SERA5)	immunoglobulin production|proteolysis|regulation of immune response|symbiont-containing vacuole|cysteine-type peptidase activity
PF3D7_0102200	SEED	ER,LR,ET,LT,ES,LS,M	ring-infected erythrocyte surface antigen (RESA)	regulation of immune response|host cell plasma membrane|symbiont-containing vacuole|merozoite dense granule|protein binding|heat shock protein binding
PF3D7_0936400	SEED	ER,LR,ET,LT,ES,LS,M	ring-exported protein 4 (REX4)	host cell cytoplasm|apicoplast
PF3D7_0936300	SEED	ER,LR,ET,LT,ES,LS,M	ring-exported protein 3 (REX3)	host cell cytoplasm
PF3D7_0935900	SEED	ER,LR,ET,LT,ES,LS,M	ring-exported protein 1 (REX1)	cytoplasm|Maurer's cleft|host cell cytoplasm|host cell membrane|protein binding
PF3D7_0501500	SEED	ER,LR,LT,ES,LS,M	rhoptry-associated protein 3 (RAP3)	rhoptry
PF3D7_0826700	SEED	ER,LR,ET,LT,ES,LS,M	receptor for activated c kinase (RACK)	cytosol|protein kinase C binding|protein binding
PF3D7_0626800	SEED	ER,LR,ET,LT,ES,LS,M	pyruvate kinase (PyrK)	glycolysis|protein homotetramerization|magnesium ion binding|catalytic activity|pyruvate kinase activity|potassium ion binding
PF3D7_0513300	SEED	ER,LR,ET,LT,ES,LS,M	purine nucleoside phosphorylase (PNP)	nucleoside metabolic process|catalytic activity
PF3D7_0214100	SEED	ER,LR,ET,LT,ES,LS,M	protein transport protein SEC31 (SEC31)	ER to Golgi vesicle-mediated transport|translocation of peptides or proteins into host cell cytoplasm|Maurer's cleft|COPII vesicle coat|ER to Golgi transport vesicle|host cell cytoplasm|protein binding
PF3D7_0822600	SEED	ER,LR,ET,LT,ES,LS,M	protein transport protein SEC23 (SEC23)	intracellular protein transport|ER to Golgi vesicle-mediated transport|Maurer's cleft|COPII vesicle coat|zinc ion binding|protein binding
PF3D7_0827900	SEED	ER,LR,ET,LT,ES,LS,M	protein disulfide isomerase (PDI8)	protein folding|cell redox homeostasis|endoplasmic reticulum|endoplasmic reticulum lumen|microneme|protein disulfide isomerase activity|isomerase activity
PF3D7_0501000	SEED	ER,LR,ET,LT,ES,LS,M	Plasmodium exported protein, unknown function	Maurer's cleft|cytoplasm
PF3D7_0702100	SEED	ER,LR,ET,ES,LS,M	Plasmodium exported protein (PHISTb), unknown function, pseudogene	nucleus|membrane|metal ion binding
PF3D7_0731300	SEED	ER,LR,ET,LT,ES,LS,M	Plasmodium exported protein (PHISTb), unknown function (PfG174)	Maurer's cleft|transferase activity
PF3D7_0401800	SEED	ER,LR,ET,LT,ES,LS	Plasmodium exported protein (PHISTb), unknown function (PfD80)	Maurer's cleft|host cell periphery
PF3D7_0424600	SEED	ER,LR,ET,LT,ES,LS,M	Plasmodium exported protein (PHISTb), unknown function	host cell periphery|protein folding|plasma membrane|heat shock protein binding|unfolded protein binding
PF3D7_0532300	SEED	ER,LR,ET,LT,ES,LS,M	Plasmodium exported protein (PHISTb), unknown function	membrane
PF3D7_1201000	SEED	ER,LR,ET,LT,ES,LS	Plasmodium exported protein (PHISTb), unknown function	cytoplasm|membrane|ATP binding
PF3D7_1001900	SEED	ER,LR,ET,LT,ES,LS,M	Plasmodium exported protein (hyp16), unknown function (PfJ23)	membrane|Maurer's cleft
PF3D7_1001000	SEED	LR,ET,LT	Plasmodium exported protein (hyp12), unknown function (PfJ13)	apicoplast|Maurer's cleft
PF3D7_1343000	SEED	ER,LR,ET,LT,ES,LS,M	phosphoethanolamine N-methyltransferase (PMT)	phosphatidylcholine biosynthetic process|metabolic process|Golgi apparatus|phosphoethanolamine N-methyltransferase activity
PF3D7_0201600	SEED	ER,LR,ET,LT,ES,LS,M	PHISTb domain-containing RESA-like protein 1 (RLP1)	cytoadherence to microvasculature, mediated by symbiont protein|host cell cytosol|host cell surface|cytoplasm|membrane|host cell part
PF3D7_0700800	SEED	ET,LT,ES	Pfmc-2TM Maurer-s cleft two transmembrane protein (MC-2TM)	translocation of peptides or proteins into host|integral to membrane|Maurer's cleft
PF3D7_0114100	SEED	ER,ET,LT,ES	Pfmc-2TM Maurer-s cleft two transmembrane protein (MC-2TM)	translocation of peptides or proteins into host|integral to membrane|symbiont-containing vacuole membrane|Maurer's cleft
PF3D7_0101300	SEED	LR,ET,LT	Pfmc-2TM Maurer-s cleft two transmembrane protein (MC-2TM)	translocation of peptides or proteins into host|integral to membrane|Maurer's cleft
PF3D7_1100800	SEED	ET,LT	Pfmc-2TM Maurer-s cleft two transmembrane protein (MC-2TM)	translocation of peptides or proteins into host|integral to membrane|Maurer's cleft
PF3D7_0324100	SEED	LR,ET,LT	Pfmc-2TM Maurer-s cleft two transmembrane protein (MC-2TM)	translocation of peptides or proteins into host|integral to membrane|Maurer's cleft
PF3D7_0713100	SEED	LT	Pfmc-2TM Maurer-s cleft two transmembrane protein (MC-2TM)	translocation of peptides or proteins into host|integral to membrane|Maurer's cleft
PF3D7_0501200	SEED	ER,LR,ET,LT,ES,LS,M	parasite-infected erythrocyte surface protein (PIESP2)	cell surface|Maurer's cleft|host cell cytoplasm|protein binding|host cell
PF3D7_0310400	SEED	ER,LR,ET,LT,ES,LS,M	parasite-infected erythrocyte surface protein (PIESP1)	cell surface|membrane|host cell plasma membrane|tubovesicular membrane network|transferase activity, transferring glycosyl groups|phosphate ion transport|extracellular region|host cell|structural molecule activity
PF3D7_0303000	SEED	ER,LR,ET,LT,ES,LS,M	N-ethylmaleimide-sensitive fusion protein (NSF)	ER to Golgi vesicle-mediated transport|food vacuole|host cell cytoplasm|nucleotide binding|ATP binding|ATPase activity|nucleoside-triphosphatase activity
PF3D7_1334500	SEED	LR,ET,LT,ES,LS	MSP7-like protein (MSRP6)	nucleus|membrane
PF3D7_1228600	SEED	ER,LR,ET,LT,ES,LS,M	merozoite surface protein 9 (MSP9)	membrane|symbiont-containing vacuole
PF3D7_1335100	SEED	ER,LR,ET,LT,ES,LS,M	merozoite surface protein 7 (MSP7)	entry into host cell|membrane
PF3D7_1353200	SEED	ER,LR,ET,LT,ES,LS,M	membrane associated histidine-rich protein (MAHRP2)	Maurer's cleft
PF3D7_1370300	SEED	ER,LR,ET,LT,ES,LS	membrane associated histidine-rich protein (MAHRP1)	Maurer's cleft
PF3D7_1229400	SEED	ER,LR,ET,LT,ES,LS,M	macrophage migration inhibitory factor (MIF)	evasion or tolerance of host immune response|cytoplasm|Maurer's cleft|host cell cytoplasm|cytokine activity|oxidoreductase activity|host cell surface receptor binding
PF3D7_0532400	SEED	ER,LR,ET,LT,ES,LS	lysine-rich membrane-associated PHISTb protein (LyMP)	infected host cell surface knob|Maurer's cleft|host cell membrane|host cell cytosol|host cell periphery|protein binding
PF3D7_1324900	SEED	ER,LR,ET,LT,ES,LS,M	L-lactate dehydrogenase (LDH)	carbohydrate metabolic process|glycolysis|cellular carbohydrate metabolic process|oxidation-reduction process|catalytic activity|L-lactate dehydrogenase activity|binding|oxidoreductase activity
PF3D7_0202000	SEED	ER,LR,ET,LT,ES,LS,M	knob-associated histidine-rich protein (KAHRP)	cytoplasm|infected host cell surface knob|Maurer's cleft|protein binding|host cell part
PF3D7_1012400	SEED	ER,LR,ET,LT,ES,LS,M	hypoxanthine-guanine phosphoribosyltransferase (HGPRT)	purine ribonucleoside salvage|nucleoside metabolic process|cytoplasm|hypoxanthine phosphoribosyltransferase activity
PF3D7_0905400	SEED	ER,LR,ET,LT,ES,LS,M	high molecular weight rhoptry protein 3 (RhopH3)	entry into host cell|rhoptry|protein binding
PF3D7_0929400	SEED	ER,LR,ET,LT,ES,LS,M	high molecular weight rhoptry protein 2 (RhopH2)	rhoptry
PF3D7_0708400	SEED	ER,LR,ET,LT,ES,LS,M	heat shock protein 90 (HSP90)	protein folding|response to stress|response to unfolded protein|response to heat|protein binding|ATP binding|ATPase activity|unfolded protein binding
PF3D7_0818900	SEED	ER,LR,ET,LT,ES,LS,M	heat shock protein 70 (HSP70)	response to unfolded protein|response to heat|nucleus|cytoplasm|protein binding|ATPase activity|heat shock protein binding|ATP binding
PF3D7_1134000	SEED	ER,LR,ET,LT,ES,LS,M	heat shock protein 70 (HSP70-3)	protein folding|response to unfolded protein|response to heat|ATP binding|unfolded protein binding
PF3D7_0917900	SEED	ER,LR,ET,LT,ES,LS,M	heat shock protein 70 (HSP70-2)	endoplasmic reticulum|ATP binding
PF3D7_0501100.2	SEED	ER,LR,ET,LT,ES,LS,M	heat shock protein 40, type II (HSP40)	protein folding|heat shock protein binding|unfolded protein binding|host cell cytosol
PF3D7_1117700	SEED	ER,LR,ET,LT,ES,LS,M	GTP-binding nuclear protein RAN/TC4 (RAN)	GTP catabolic process|RNA export from nucleus|intracellular protein transport|nucleocytoplasmic transport|signal transduction|small GTPase mediated signal transduction|protein transport|regulation of cell cycle|intracellular|nucleus|membrane|GTPase activity|protein binding|GTP binding
PF3D7_1301200	SEED	ER,LR,ET,LT,ES,LS,M	glycophorin binding protein (GBPH2)
PF3D7_1016300	SEED	ER,LR,ET,LT,ES,LS,M	glycophorin binding protein (GBP)	membrane|host cell cytoplasm
PF3D7_0312400	SEED	ER,LR,ET,LT,ES,LS,M	glycogen synthase kinase 3 (GSK3)	protein phosphorylation|peptidyl-serine phosphorylation|response to drug|Maurer's cleft|protein kinase activity|protein serine/threonine kinase activity|protein tyrosine kinase activity|ATP binding
PF3D7_1216200	SEED	ER,LR,ET,LT,ES,LS,M	glycerol-3-phosphate dehydrogenase, putative	carbohydrate metabolic process|glycerol-3-phosphate metabolic process|glycerol-3-phosphate catabolic process|oxidation-reduction process|cytoplasm|glycerol-3-phosphate dehydrogenase complex|glycerol-3-phosphate dehydrogenase (NAD+)activity|protein homodimerization activity|NAD binding
PF3D7_1462800	SEED	ER,LR,ET,LT,ES,LS,M	glyceraldehyde-3-phosphate dehydrogenase (GAPDH)	glucose metabolic process|gluconeogenesis|glycolysis|oxidation-reduction process|cytosol|membrane|glyceraldehyde-3-phosphate dehydrogenase (NAD+) (phosphorylating) activity|NADP binding|NAD binding
PF3D7_1038400	SEED	ER,LR,ET,LT,ES,LS,M	gametocyte-specific protein (Pf11-1)	SRP-dependent cotranslational protein targeting to membrane|gamete generation|protein binding|GTP binding
PF3D7_1444800	SEED	ER,LR,ET,LT,ES,LS,M	fructose-bisphosphate aldolase (FBPA)	glycolysis|cytoplasm|fructose-bisphosphate aldolase activity
PF3D7_1101500	SEED	LR,ET,LS,M	exported protein family 4 (EPF4)	membrane
PF3D7_0631500	SEED	LR,LS	exported protein family 3 (EPF3)	Maurer's cleft|membrane
PF3D7_1471100	SEED	ER,LR,ET,LT,ES,LS,M	exported protein 2 (EXP2)	symbiont-containing vacuole membrane
PF3D7_1121600	SEED	ER,LR,ET,LT,ES,LS,M	exported protein 1 (EXP1)	symbiont-containing vacuole
PF3D7_0201900	SEED	ER,LR,ET,LT,ES,LS,M	erythrocyte membrane protein 3 (EMP3)	cytoplasm|membrane|symbiont-containing vacuole|Maurer's cleft|protein binding
PF3D7_1015900	SEED	ER,LR,ET,LT,ES,LS,M	enolase (ENO)	autophagic vacuole assembly|activation of immune response|gluconeogenesis|glycolysis|transcription, DNA-dependent|phosphopyruvate hydratase complex|nucleus|cytoplasm|cytoskeleton|plasma membrane|cell surface|food vacuole|magnesium ion binding|phosphopyruvate hydratase activity|protein binding
PF3D7_1222300	SEED	ER,LR,ET,LT,ES,LS	endoplasmin, putative (GRP94)	protein folding|response to stress|response to heat|endoplasmic reticulum|ATP binding|unfolded protein binding
PF3D7_1302000	SEED	ER,LR,ET,LT,ES,LS,M	EMP1-trafficking protein (PTP6)	membrane
PF3D7_1002100	SEED	ER,LR,ET,LT,ES,LS,M	EMP1-trafficking protein (PTP5)	membrane
PF3D7_0730900	SEED	ER,LR,ET,LT,ES,LS,M	EMP1-trafficking protein (PTP4)
PF3D7_1478600	SEED	ER,LR,ET,LT	EMP1-trafficking protein (PTP3)	cytoplasm|membrane|myosin complex|motor activity|actin binding|calmodulin binding|ATP binding
PF3D7_0731100	SEED	ER,LR,ET,LT,ES,LS,M	EMP1-trafficking protein (PTP2)	membrane budding|Maurer's cleft
PF3D7_0202200	SEED	ER,LR,ET,LT,ES,LS,M	EMP1-trafficking protein (PTP1)	integral to membrane|Maurer's cleft|host cell cytoplasm|protein complex|cytoplasm|host cell part
PF3D7_0829600	SEED	LR,ET,LT,ES,LS	early transcribed membrane protein 8 (ETRAMP8)	symbiont-containing vacuole membrane
PF3D7_0532100	SEED	ER,LR,ET,LT,ES,LS,M	early transcribed membrane protein 5 (ETRAMP5)	symbiont-containing vacuole membrane
PF3D7_0423700	SEED	ER,LR,ET,LT,ES,LS,M	early transcribed membrane protein 4 (ETRAMP4)	symbiont-containing vacuole membrane|membrane
PF3D7_0202500	SEED	ER,LR,ET,LT,ES,LS,M	early transcribed membrane protein 2 (ETRAMP2)	symbiont-containing vacuole membrane
PF3D7_1401400	SEED	ER,LR,ET,LT,ES,LS,M	early transcribed membrane protein 14.1 (ETRAMP14)	membrane
PF3D7_1240100	SEED	ER,LR,ET,LT,ES,LS,M	early transcribed membrane protein 12 (ETRAMP12)	membrane|apicoplast
PF3D7_1102800	SEED	ER,LR,ET,LT,ES,LS,M	early transcribed membrane protein 11.2 (ETRAMP11.2)	integral to membrane
PF3D7_1102700	SEED	ER,LR,ET,LT,ES,LS,M	early transcribed membrane protein 11.1 (ETRAMP11.1)	integral to membrane
PF3D7_1016900	SEED	ER,LR,ET,LT,ES,LS,M	early transcribed membrane protein 10.3 (ETRAMP10.3)	symbiont-containing vacuole membrane
PF3D7_1033200	SEED	ER,LR,ET,LT,ES,LS,M	early transcribed membrane protein 10.2 (ETRAMP10.2)	symbiont-containing vacuole membrane|Maurer's cleft
PF3D7_1001500	SEED	ER,LR,ET,LT,ES,LS,M	early transcribed membrane protein 10.1 (ETRAMP10)	symbiont-containing vacuole membrane|membrane
PF3D7_0935800	SEED	ER,LR,LT,ES,LS	cytoadherence linked asexual protein 9 (CLAG9)	cell-cell adhesion|rhoptry
PF3D7_0302200	SEED	ER,LR,ET,LT,ES,LS,M	cytoadherence linked asexual protein 3.2 (CLAG3.2)	cytoadherence to microvasculature, mediated by symbiont protein|host cell plasma membrane|rhoptry|cell adhesion molecule binding
PF3D7_0302500	SEED	ER,LR,ET,LT,ES,LS,M	cytoadherence linked asexual protein 3.1 (CLAG3.1)	cytoadherence to microvasculature, mediated by symbiont protein|host cell plasma membrane|rhoptry|cell adhesion molecule binding
PF3D7_0717600	SEED	ER,ES	conserved Plasmodium protein, unknown function	cytoplasm|myosin complex|motor activity|actin binding|calmodulin binding|ATP binding
PF3D7_1445700	SEED	ER,LR,ET,LT,ES,LS,M	conserved Plasmodium protein, unknown function	Maurer's cleft
PF3D7_1149000	SEED	LR,ET,LT,ES	antigen 332, DBL-like protein (Pf332)	pathogenesis|cell-cell adhesion|integral to membrane|Maurer's cleft|host cell membrane|receptor activity|host cell surface receptor binding
PF3D7_1037300	SEED	ER,LR,ET,LT,ES,LS,M	ADP/ATP transporter on adenylate translocase (ADT)	transport|mitochondrial inner membrane|ATP:ADP antiporter activity|binding
PF3D7_1008900	SEED	ER,LR,ET,LT,ES,LS,M	adenylate kinase (AK1)	generation of precursor metabolites and energy|nucleobase-containing compound metabolic process|nucleotide phosphorylation|cytosol|adenylate kinase activity|ATP binding|nucleotide kinase activity|nucleobase-containing compound kinase activity
PF3D7_1479000	SEED	ER,LR,LS,M	acyl-CoA synthetase (ACS1a)	fatty acid metabolic process|metabolic process|host cell cytoplasm|catalytic activity|long-chain fatty acid-CoA ligase activity
PF3D7_0818200	SEED	ER,LR,ET,LT,ES,LS,M	14-3-3 protein (14-3-3I)	nucleus|cytoplasm|food vacuole|protein domain specific binding|histone binding
PF3D7_0936500	PREDICTED	LR,M	virulence-associated protein 1 (VAP1)	pathogenesis|symbiont-containing vacuole|Maurer's cleft|host cell membrane|cell adhesion molecule binding|apicoplast
PF3D7_1323200	PREDICTED	M	V-type proton ATPase subunit G, putative	vacuolar acidification|proton transport|vacuolar proton-transporting V-type ATPase, V1 domain|vacuolar proton-transporting V-type ATPase complex|food vacuole|hydrolase activity, acting on acid anhydrides, catalyzing transmembrane movement of substances
PF3D7_1033900	PREDICTED	ER,LR,LT,ES,LS,M	ubiquitin-conjugating enzyme, putative	ubiquitin-dependent protein catabolic process|protein ubiquitination|post-translational protein modification|regulation of protein metabolic process|ubiquitin-protein ligase activity|acid-amino acid ligase activity
PF3D7_0830500	PREDICTED	ER,LR,ET,LS	tryptophan/threonine-rich antigen (TryThrA)	endoplasmic reticulum|Maurer's cleft|host cell membrane
PF3D7_0610800	PREDICTED	LT	transketolase (TK)	pentose-phosphate shunt|metabolic process|nucleus|cytoplasm|catalytic activity|transketolase activity
PF3D7_1007700	PREDICTED	LR	transcription factor with AP2 domain(s) (ApiAP2)	regulation of transcription, DNA-dependent|sequence-specific DNA binding transcription factor activity
PF3D7_0618700	PREDICTED	LT,ES	trafficking protein particle complex subunit 6A, putative
PF3D7_0310700	PREDICTED	ER,LR,ET,LT,ES,LS	trafficking protein particle complex subunit 4, putative	transport|ER to Golgi vesicle-mediated transport|cis-Golgi network
PF3D7_0418500	PREDICTED	LR,ET,ES,LS,LS	trafficking protein particle complex subunit 3, putative (BET3)	ER to Golgi vesicle-mediated transport|Golgi apparatus|transporter activity
PF3D7_1332300	PREDICTED	ER,LR,ET,LT,ES,LS	trafficking protein particle complex subunit 2, putative (TRAPPC2)	transport|ER to Golgi vesicle-mediated transport|vesicle-mediated transport|intracellular
PF3D7_1438900	PREDICTED	M	thioredoxin peroxidase 1 (Trx-Px1)	response to oxidative stress|response to heat|DNA protection|cell redox homeostasis|oxidation-reduction process|cytosol|thioredoxin peroxidase activity|antioxidant activity|oxidoreductase activity|protein dimerization activity|peroxiredoxin activity
PF3D7_0214000	PREDICTED	LR,ET,LT,ES	T-complex protein 1 subunit theta (CCT8)	protein folding|cellular protein metabolic process|chaperonin-containing T-complex|host cell cytoplasm|apical part of cell|protein binding|ATP binding|unfolded protein binding|ATPase activity, coupled
PF3D7_1000800	PREDICTED	LT	stevor, pseudogene
PF3D7_0631900	PREDICTED	ER,ET,LT,ES	stevor	modulation by symbiont of host erythrocyte aggregation|membrane|Maurer's cleft
PF3D7_0408700	PREDICTED	LR,LT,ES,LS	sporozoite micronemal protein essential for cell traversal (PLP1)	symbiont-containing vacuole membrane|microneme|host cell membrane|calcium ion binding|wide pore channel activity
PF3D7_0424700	PREDICTED	ER,LR,ET,LT,ES,LS	serine/threonine protein kinase, FIKK family (FIKK4.2)	protein phosphorylation|host cell cytoplasm|protein kinase activity|ATP binding|kinase activity|apicoplast|protein serine/threonine kinase activity
PF3D7_0424500	PREDICTED	LT,ES	serine/threonine protein kinase, FIKK family (FIKK4.1)	protein phosphorylation|Maurer's cleft|protein kinase activity|protein serine/threonine kinase activity|ATP binding
PF3D7_1039000	PREDICTED	ER,LT	serine/threonine protein kinase, FIKK family (FIKK10.2)	protein phosphorylation|protein kinase activity|protein serine/threonine kinase activity|ATP binding
PF3D7_1016400	PREDICTED	ER	serine/threonine protein kinase, FIKK family (FIKK10.1)	protein phosphorylation|mitochondrion|membrane|protein kinase activity|protein serine/threonine kinase activity|ATP binding
PF3D7_1443000	PREDICTED	LT,ES,LS	serine/threonine protein kinase (SRPK2)	protein phosphorylation|nucleus|cytoplasm|protein kinase activity|protein serine/threonine kinase activity|ATP binding
PF3D7_0922200	PREDICTED	ER	S-adenosylmethionine synthetase (SAMS)	S-adenosylmethionine biosynthetic process|methanogenesis|methionine adenosyltransferase activity|ATP binding|phosphate ion binding|protein homodimerization activity|ADP binding|metal ion binding|one-carbon metabolic process
PF3D7_0520900	PREDICTED	ES	S-adenosyl-L-homocysteine hydrolase (SAHH)	one-carbon metabolic process|adenosylhomocysteinase activity|binding
PF3D7_1244200	PREDICTED	ER,LR,ET,LT,ES	RNA polymerase II transcription factor B subunit 2, putative (TFB2)	DNA repair|regulation of transcription, DNA-dependent|nucleus|RNA polymerase II transcription factor activity
PF3D7_1149200	PREDICTED	ER,ER,LR,ET,LT,ES	ring-infected erythrocyte surface antigen	protein folding|spectrin binding|heat shock protein binding|unfolded protein binding
PF3D7_1041200	PREDICTED	ET,LT,ES	rifin (RIF)	antigenic variation|membrane|host cell plasma membrane
PF3D7_1017100	PREDICTED	ER,LR,LT,ES,LS	rhoptry neck protein 12 (RON12)	membrane|apicoplast
PF3D7_0711500	PREDICTED	ER,LR,ET,ES,LS,M	regulator of chromosome condensation, putative	cell cycle|chromosome condensation|nucleus|chromatin binding
PF3D7_0512600	PREDICTED	ER,LR,ET,LT,ES	ras-related protein Rab-1B (RAB1b)	GTP catabolic process|intracellular protein transport|nucleocytoplasmic transport|signal transduction|small GTPase mediated signal transduction|protein transport|regulation of vesicle-mediated transport|intracellular|endoplasmic reticulum-Golgi intermediate compartment|membrane|food vacuole|GTPase activity|GTP binding|protein binding
PF3D7_0914000	PREDICTED	ER,ES,LS,M	pseudouridylate synthase, putative	pseudouridine synthesis|RNA modification|apicoplast|RNA binding|pseudouridine synthase activity
PF3D7_0219500	PREDICTED	ES,LS	pseudouridine synthase, putative	rRNA modification|pseudouridine synthesis|RNA modification|membrane|apicoplast|RNA binding|pseudouridylate synthase activity|pseudouridine synthase activity|intramolecular transferase activity
PF3D7_1432700	PREDICTED	LR	protein-L-isoaspartate(D-aspartate) O-methyltransferase, putative	cellular protein modification process|protein repair|protein-L-isoaspartate (D-aspartate) O-methyltransferase activity
PF3D7_1472100	PREDICTED	ES	protein transport protein YIP1, putative (YIP1)	membrane
PF3D7_0405100	PREDICTED	ER,LR,ET,LT,ES,LS,M	protein transport protein Sec24B (SEC24B)	intracellular protein transport|ER to Golgi vesicle-mediated transport|protein transport by the Sec complex|COPII vesicle coat|zinc ion binding|protein transporter activity|protein binding
PF3D7_1361100	PREDICTED	ER,LR,ET,LT,ES,LS,M	protein transport protein Sec24A (SEC24A)	intracellular protein transport|ER to Golgi vesicle-mediated transport|protein transport by the Sec complex|endoplasmic reticulum|COPII vesicle coat|protein binding|zinc ion binding|protein transporter activity
PF3D7_0320100	PREDICTED	LT,ES	protein transport protein SEC22 (SEC22)	transport|intracellular protein transport|ER to Golgi vesicle-mediated transport|vesicle-mediated transport|regulation of vesicle fusion|endoplasmic reticulum|Golgi apparatus|integral to membrane|ER to Golgi transport vesicle|SNARE complex|SNAP receptor activity|protein binding
PF3D7_1230700	PREDICTED	ER,LR,ET,LT,ES	protein transport protein SEC13 (SEC13)	protein binding
PF3D7_0213100	PREDICTED	LT	protein SIS1 (SIS1)	protein folding|response to unfolded protein|response to heat|cytosol|heat shock protein binding|unfolded protein binding
PF3D7_0935500	PREDICTED	ER,LR,ET,LT,ES,LS,M	Plasmodium exported protein, unknown function (GEXP22)	ATP binding
PF3D7_0532600	PREDICTED	ER,LR,ET,LT,ES	Plasmodium exported protein, unknown function	host cell cytosol|nucleus|apicoplast
PF3D7_1352900	PREDICTED	ER,LR,ET,LT,LS,M	Plasmodium exported protein, unknown function
PF3D7_0731200	PREDICTED	LT	Plasmodium exported protein, unknown function
PF3D7_0701900	PREDICTED	ER,LR,ET,LS	Plasmodium exported protein, unknown function	cytoplasm|myosin complex|motor activity|actin binding|calmodulin binding|ATP binding
PF3D7_0935700	PREDICTED	ET,ES	Plasmodium exported protein, unknown function	translation|valyl-tRNA aminoacylation|cytoplasm|valine-tRNA ligase activity|ATP binding
PF3D7_0112900	PREDICTED	ES,LS	Plasmodium exported protein, unknown function	cytoplasm
PF3D7_0220200	PREDICTED	ER,LR,ET,LT,ES,LS,M	Plasmodium exported protein, unknown function	membrane|apicoplast|protein binding
PF3D7_1252900	PREDICTED	ES	Plasmodium exported protein, unknown function	post-translational protein modification|regulation of protein metabolic process|ubiquitin-protein ligase activity|ubiquitin cycle
PF3D7_0730800.2	PREDICTED	ER,LR,ET,LT,ES,LS,M	Plasmodium exported protein, unknown function	nucleus
PF3D7_1401200	PREDICTED	ET,LT,ES,LS	Plasmodium exported protein, unknown function	membrane|apicoplast
PF3D7_0221700	PREDICTED	ER,LR	Plasmodium exported protein, unknown function	extracellular region|membrane
PF3D7_0726100	PREDICTED	LT,LS	Plasmodium exported protein, unknown function
PF3D7_0301800	PREDICTED	LT	Plasmodium exported protein, unknown function	membrane
PF3D7_1148900	PREDICTED	ER,LR,ET,LT,ES,LS,M	Plasmodium exported protein, unknown function	integral to membrane
PF3D7_1478800	PREDICTED	LR,ET,LT,LS,M	Plasmodium exported protein, unknown function	membrane
PF3D7_0219700	PREDICTED	LT,ES	Plasmodium exported protein (PHISTc), unknown function (GEXP20)	membrane
PF3D7_1148700	PREDICTED	ER,LR,ES,LS	Plasmodium exported protein (PHISTc), unknown function (GEXP12)	membrane|apicoplast
PF3D7_0936600	PREDICTED	ER,LR,ET,LT,ES,LS	Plasmodium exported protein (PHISTc), unknown function (GEXP05)	host cell cytosol
PF3D7_0424000	PREDICTED	ER,LR,ET,LT,ES,LS	Plasmodium exported protein (PHISTc), unknown function	cytoplasm|nucleotide binding|protein binding
PF3D7_0801000	PREDICTED	ER,LR,ET,LT	Plasmodium exported protein (PHISTc), unknown function	nucleus|apicoplast
PF3D7_0936800	PREDICTED	ER,LR,ET,LT,ES,LS,M	Plasmodium exported protein (PHISTc), unknown function	host cell plasma membrane|Maurer's cleft|host cell cytosol
PF3D7_1016700	PREDICTED	LT	Plasmodium exported protein (PHISTc), unknown function
PF3D7_0830600	PREDICTED	ER,LR,ET,LT,M	Plasmodium exported protein (PHISTc), unknown function	Maurer's cleft
PF3D7_1016800	PREDICTED	ET,LT,M	Plasmodium exported protein (PHISTc), unknown function	membrane
PF3D7_1476200	PREDICTED	ER,LR,ET,LT	Plasmodium exported protein (PHISTb), unknown function	cytoplasm|membrane|myosin complex|apicoplast|motor activity|calmodulin binding|ATP binding
PF3D7_0402100	PREDICTED	LT,ES	Plasmodium exported protein (PHISTb), unknown function	protein folding|membrane
PF3D7_1253300	PREDICTED	ER,ET,ES,LS	Plasmodium exported protein (PHISTa), unknown function, pseudogene	membrane|apicoplast|transferase activity|metal ion binding
PF3D7_1478000	PREDICTED	ER,LR	Plasmodium exported protein (PHISTa), unknown function (GEXP17)	membrane
PF3D7_0402000	PREDICTED	ER,LR,ET,LT,ES	Plasmodium exported protein (PHISTa), unknown function	symbiont-containing vacuole membrane|protein binding|rRNA processing|ribosome biogenesis|nucleus|RNA binding|helicase activity|ATP binding|ATP-dependent helicase activity
PF3D7_1253100	PREDICTED	ER,LR,ET,LT,ES,LS	Plasmodium exported protein (PHISTa), unknown function	membrane
PF3D7_1201200	PREDICTED	ES	Plasmodium exported protein (PHISTa-like), unknown function	membrane
PF3D7_0201500	PREDICTED	ER,LR,ET,LT,ES,LS,M	Plasmodium exported protein (hyp9), unknown function	membrane|apicoplast
PF3D7_1301700	PREDICTED	ER,ER,LR,ET,LT,ES,LS	Plasmodium exported protein (hyp8), unknown function (GEXP07)	apicoplast
PF3D7_0800900	PREDICTED	ER	Plasmodium exported protein (hyp7), unknown function, pseudogene	ATP binding
PF3D7_1301400	PREDICTED	ER,LR,ET,LT,ES,LS	Plasmodium exported protein (hyp12), unknown function (HYP12)	cytoplasm|membrane|ATP binding
PF3D7_0702000	PREDICTED	ES	Plasmodium exported protein (hyp12), unknown function	apicoplast|nucleotide binding
PF3D7_0202300	PREDICTED	LT	Plasmodium exported protein (hyp11), unknown function	membrane|apicoplast
PF3D7_0936200	PREDICTED	ER,ET,LT,ES	Plasmodium exported protein (hyp11), unknown function	cytoplasm|membrane
PF3D7_0301600	PREDICTED	ER,LR	Plasmodium exported protein (hyp1), unknown function (GEXP21)	extracellular region|apicoplast|structural constituent of cell wall
PF3D7_1120100	PREDICTED	ER,LR,ET,LT,ES	phosphoglycerate mutase, putative (PGM1)	glycolysis|cytosol|phosphoglycerate mutase activity
PF3D7_0922500	PREDICTED	ER,LR,LT,ES	phosphoglycerate kinase (PGK)	glycolysis|phosphoglycerate kinase activity
PF3D7_0322000	PREDICTED	ER,ER,LR,LT,ES,LS	peptidyl-prolyl cis-trans isomerase (CYP19A)	protein peptidyl-prolyl isomerization|protein folding|cytosol|peptidyl-prolyl cis-trans isomerase activity|cyclosporin A binding
PF3D7_1129100	PREDICTED	M	parasitophorous vacuolar protein 1 (PV1)	signal transduction|intracellular|symbiont-containing vacuole|GTPase activator activity|protein binding
PF3D7_1250100	PREDICTED	M	osmiophilic body protein (G377)	osmiophilic body
PF3D7_1347200	PREDICTED	ER,LR,ET,LT,ES,LS,M	nucleoside transporter 1 (NT1)	transport|purine nucleobase transport|adenosine transport|integral to plasma membrane|membrane|integral to membrane|nucleoside transmembrane transporter activity
PF3D7_0112200	PREDICTED	LS	multidrug resistance-associated protein 1 (MRP1)	transport|response to drug|transmembrane transport|integral to plasma membrane|integral to membrane|ATP-binding cassette (ABC) transporter complex|nucleotide binding|ATP binding|ATPase activity|nucleoside-triphosphatase activity|ATPase activity, coupled to transmembrane movement of substances|glutathione binding
PF3D7_1334300	PREDICTED	LT	MSP7-like protein (MSRP5)	apicoplast
PF3D7_0715500	PREDICTED	M	mitochondrial ATP synthase F1, epsilon subunit, putative	ATP synthesis coupled proton transport|mitochondrial proton-transporting ATP synthase complex, catalytic core F(1)|mitochondrion|mitochondrial proton-transporting ATP synthase complex|hydrogen ion transporting ATP synthase activity, rotational mechanism|proton-transporting ATPase activity, rotational mechanism
PF3D7_0502400	PREDICTED	LT	merozoite surface protein 8 (MSP8)	plasma membrane|membrane|symbiont-containing vacuole|food vacuole
PF3D7_0207000	PREDICTED	LR	merozoite surface protein 4 (MSP4)	integral to membrane|anchored to plasma membrane
PF3D7_0500800	PREDICTED	ER,LR,ET,LT,ES,LS	mature parasite-infected erythrocyte surface antigen (MESA)	host cell plasma membrane|protein binding|heat shock protein binding
PF3D7_1252600	PREDICTED	LT	lysophospholipase, putative
PF3D7_0508200	PREDICTED	LT,ES,LS	longevity-assurance (LAG1) protein, putative	endoplasmic reticulum|integral to membrane|apicoplast
PF3D7_0202100	PREDICTED	LT	liver stage associated protein 2 (LSAP2)	membrane
PF3D7_0417300	PREDICTED	LS	LETM1-like protein, putative	apicoplast
PF3D7_0201800	PREDICTED	ER,LR,ET,LT,ES,LS,M	knob associated heat shock protein 40 (KAHsp40)	protein folding|infected host cell surface knob|heat shock protein binding|unfolded protein binding
PF3D7_0501400	PREDICTED	ER,LR,ET,LT,ES,LS,M	interspersed repeat antigen (FIRA)	extracellular region|hormone activity
PF3D7_1372200	PREDICTED	ER,LR,ET,LT,ES,LS	histidine-rich protein III (HRPIII)
PF3D7_0831800	PREDICTED	ER,ET,LT,ES,LS	histidine-rich protein II (HRPII)	heme catabolic process|food vacuole
PF3D7_0624000	PREDICTED	LT	hexokinase (HK)	cellular glucose homeostasis|carbohydrate metabolic process|glycolysis|carbohydrate phosphorylation|cytosol|hexokinase activity|ATP binding|glucose binding
PF3D7_1211400	PREDICTED	LT	heat shock protein DNAJ homologue Pfj4 (PfJ4)	response to unfolded protein|response to heat|heat shock protein binding|unfolded protein binding
PF3D7_1015600	PREDICTED	LR,ET,LT,ES	heat shock protein 60 (HSP60)	protein folding|protein targeting to mitochondrion|response to unfolded protein|protein refolding|cellular protein metabolic process|cytoplasm|mitochondrion|ATP binding|ATPase activity, coupled|protein binding
PF3D7_0113700	PREDICTED	LR,ET,LS,M	heat shock protein 40, type II (HSP40)	protein folding|response to heat|host cell cytosol|heat shock protein binding|unfolded protein binding
PF3D7_1116800	PREDICTED	LT,ES	heat shock protein 101 (HSP101)	protein folding|response to unfolded protein|response to heat|protein transport|protein metabolic process|protein hexamerization|translocation of peptides or proteins into host cell cytoplasm|symbiont-containing vacuole|symbiont-containing vacuole membrane|apical complex|nucleotide binding|protein binding|ATP binding|zinc ion binding|ATPase activity|nucleoside-triphosphatase activity|protein dime…
PF3D7_1114200	PREDICTED	LT	GTPase-activating protein, putative	regulation of Rab GTPase activity|intracellular|Rab GTPase activator activity
PF3D7_1217300	PREDICTED	ES,LS,M	GTP-binding protein, putative	intracellular|apicoplast|GTP binding
PF3D7_0313500	PREDICTED	ES	GTP-binding protein EngA, putative	GTP binding
PF3D7_1318200	PREDICTED	M	glycerol-3-phosphate 1-O-acyltransferase, putative (G3PAT)	glycerophospholipid metabolic process|metabolic process|glycerolipid biosynthetic process|apicoplast|glycerol-3-phosphate O-acyltransferase activity
PF3D7_1351600	PREDICTED	ER,ET,ES,LS	glycerol kinase (GK)	carbohydrate metabolic process|glycerol metabolic process|glycerol-3-phosphate metabolic process|glycerol kinase activity|ATP binding
PF3D7_1436000	PREDICTED	ER,LR,ET,LT,ES,M	glucose-6-phosphate isomerase (GPI)	gluconeogenesis|glycolysis|pentose-phosphate shunt|glucose-6-phosphate isomerase activity
PF3D7_0935600	PREDICTED	ER,LR,ET,LT,ES,LS,M	gametocytogenesis-implicated protein (GIG)
PF3D7_1204300	PREDICTED	ER,LR,ET	eukaryotic translation initiation factor 5A (EIF5A)	translational initiation|translational frameshifting|peptidyl-lysine modification to hypusine|positive regulation of translational elongation|positive regulation of translational termination|RNA binding|translation initiation factor activity|translation elongation factor activity|ribosome binding
PF3D7_1124600	PREDICTED	ER,ES,LS	ethanolamine kinase (EK)	lipid metabolic process|phosphatidylethanolamine biosynthetic process|phosphatidylcholine biosynthetic process|cytoplasm|ethanolamine kinase activity
PF3D7_1200600	PREDICTED	ER,LR,ET	erythrocyte membrane protein 1, PfEMP1 (VAR2CSA)	pathogenesis|cell-cell adhesion|modulation by symbiont of host erythrocyte aggregation|antigenic variation|cytoadherence to microvasculature, mediated by symbiont protein|integral to membrane|host cell plasma membrane|infected host cell surface knob|receptor activity|host cell surface receptor binding|cell adhesion molecule binding
PF3D7_1101900	PREDICTED	ET	erythrocyte membrane protein 1 (PfEMP1), truncated, pseudogene
PF3D7_1108600	PREDICTED	ER,LR,ET,LT,ES,LS	endoplasmic reticulum-resident calcium binding protein (ERC)	intracellular protein transport|endoplasmic reticulum|calcium ion binding
PF3D7_1124000	PREDICTED	M	endoplasmic reticulum oxidoreductin, putative (ERO1)	protein folding|protein thiol-disulfide exchange|oxidation-reduction process|endoplasmic reticulum|endoplasmic reticulum membrane|protein binding|electron carrier activity|oxidoreductase activity|oxidoreductase activity, acting on a sulfur group of donors, disulfide as acceptor|flavin adenine dinucleotide binding
PF3D7_0913200	PREDICTED	ER,LR,ET,LT,ES,LS	elongation factor 1-beta (EF-1beta)	translational elongation|eukaryotic translation elongation factor 1 complex|translation elongation factor activity
PF3D7_1473200	PREDICTED	ER,LR,ET,LT,ES	DnaJ protein, putative	heat shock protein binding
PF3D7_1401100	PREDICTED	ER,LR,ET,LT,ES,LS,M	DnaJ protein, putative	heat shock protein binding
PF3D7_1149600	PREDICTED	ER,LR,LS	DnaJ protein, putative	protein folding|heat shock protein binding|unfolded protein binding
PF3D7_0220100	PREDICTED	LT	DnaJ protein, putative	membrane|heat shock protein binding|protein folding|unfolded protein binding
PF3D7_0201700	PREDICTED	ER,LR,ET,LT,LS,M	DnaJ protein, putative	host cell part|heat shock protein binding|protein folding|unfolded protein binding
PF3D7_1311700	PREDICTED	ES	cytochrome c2 precursor, putative	mitochondrial respiratory chain|iron ion binding|electron carrier activity|heme binding|electron transport
PF3D7_1404100	PREDICTED	ER,LR,LT,ES,LS,M	cytochrome c, putative	mitochondrion|mitochondrial respiratory chain|iron ion binding|electron carrier activity|heme binding|electron transport
PF3D7_0530800	PREDICTED	ES	CPW-WPC family protein
PF3D7_1465400	PREDICTED	ES	conserved Plasmodium protein, unknown function
PF3D7_0108500	PREDICTED	ER,ET,LT,ES,LS	conserved Plasmodium protein, unknown function	membrane|integral to membrane
PF3D7_0108600	PREDICTED	LT	conserved Plasmodium protein, unknown function	DNA replication|protein folding|response to heat|cytoplasm|ATP binding|zinc ion binding|heat shock protein binding|unfolded protein binding
PF3D7_1476000	PREDICTED	LT	conserved Plasmodium protein, unknown function	plasma membrane|integral to membrane
PF3D7_0411000	PREDICTED	LT	conserved Plasmodium protein, unknown function	membrane|integral to membrane|apicoplast
PF3D7_1115800	PREDICTED	ER,ET,LT,ES	conserved Plasmodium protein, unknown function	nucleus
PF3D7_1225400	PREDICTED	LT	conserved Plasmodium protein, unknown function	transcription, DNA-dependent|cytoplasm|membrane|integral to membrane|ATP binding|zinc ion binding|hydrolase activity
PF3D7_0507300	PREDICTED	ES	conserved Plasmodium protein, unknown function
PF3D7_1404800	PREDICTED	ER,LR,ET,LT,ES,LS	conserved Plasmodium protein, unknown function
PF3D7_1401800	PREDICTED	ER,ET,LT,ES,LS	choline kinase (CK)	lipid metabolic process|phosphatidylcholine biosynthetic process|cytosol|choline kinase activity|choline binding
PF3D7_0705900	PREDICTED	ER	ATP synthase subunit C, putative	ATP synthesis coupled proton transport|ATP hydrolysis coupled proton transport|membrane|proton-transporting two-sector ATPase complex|proton-transporting ATP synthase complex, coupling factor F(o)|hydrogen ion transmembrane transporter activity|hydrogen ion transporting ATP synthase activity, rotational mechanism|proton-transporting ATPase activity, rotational mechanism
PF3D7_1132800	PREDICTED	ER,LR	aquaglyceroporin (AQP)	transport|water transport|glycolipid biosynthetic process|polyol transport|glucosylglycerol transport|membrane|perinuclear region of cytoplasm|transporter activity|ammonia transmembrane transporter activity
PF3D7_1329400	PREDICTED	ER,LR,ET,ES,LS,M	AMP deaminase, putative	AMP catabolic process|purine ribonucleoside monophosphate biosynthetic process|AMP deaminase activity|deaminase activity
PF3D7_1119800	PREDICTED	LT	alternative splicing factor ASF-1, putative (ASF1)	nucleic acid binding
PF3D7_1001400	PREDICTED	LT	alpha/beta hydrolase, putative
PF3D7_0206700	PREDICTED	LS	adenylosuccinate lyase (ASL)	purine nucleotide metabolic process|IMP biosynthetic process|purine ribonucleotide biosynthetic process|catalytic activity|N6-(1,2-dicarboxyethyl)AMP AMP-lyase (fumarate-forming) activity
PF3D7_1322000	PREDICTED	LT,ES,LS	adenosine-diphosphatase, putative	endoplasmic reticulum lumen|membrane|hydrolase activity
PF3D7_1029600	PREDICTED	ER,LR,LT,ES,LS	adenosine deaminase (ADA)	purine ribonucleoside monophosphate biosynthetic process|adenosine deaminase activity|deaminase activity
PF3D7_1200700	PREDICTED	ER,LR,ES,M	acyl-CoA synthetase (ACS7)	metabolic process|apicoplast|catalytic activity
PF3D7_0401900	PREDICTED	M	acyl-CoA synthetase (ACS6)	metabolic process|fatty acid transport|catalytic activity|long-chain fatty acid-CoA ligase activity
PF3D7_1253400	PREDICTED	ER,M	acyl-CoA synthetase (ACS3)	fatty acid metabolic process|transport|metabolic process|host cell cytoplasm|catalytic activity|long-chain fatty acid-CoA ligase activity|ankyrin binding
PF3D7_0525100	PREDICTED	ER,M	acyl-CoA synthetase (ACS10)	fatty acid metabolic process|metabolic process|catalytic activity|long-chain fatty acid-CoA ligase activity
PF3D7_1001100.2	PREDICTED	ET	acyl-CoA binding protein, isoform 1, ACBP1 (ACBP1)	fatty acid metabolic process|fatty-acyl-CoA binding
PF3D7_0103800	PREDICTED	LR,LT	actin-related protein (ARP1)	dynactin complex|apical part of cell|structural constituent of cytoskeleton|actin cytoskeleton|protein binding
PF3D7_0309600	PREDICTED	ES,LS	60S acidic ribosomal protein P2 (PfP2)	translational elongation|entry into host cell|intracellular|ribosome|cell surface|large ribosomal subunit|cytosolic large ribosomal subunit|host cell surface|structural constituent of ribosome
PF3D7_1346700	PREDICTED	ER,LT,LS	6-cysteine protein (P48/45)	attachment of GPI anchor to protein|membrane
PF3D7_1358800	PREDICTED	LR,ET,LT	40S ribosomal protein S15 (RPS15)	translation|intracellular|ribosome|cytosolic small ribosomal subunit|structural constituent of ribosome
PF3D7_1444300	PREDICTED	ER,LR,ET	1-acyl-sn-glycerol-3-phosphate acyltransferase, putative (LPAAT)	metabolic process|membrane|transferase activity, transferring acyl groups
