# Supplementary material for: A network-based approach reveals novel invasion and Maurer's clefts-related proteins in Plasmodium falciparum
Source: Royal Society of Chemistry journal article supplement (doi:10.1039/c9mo00124g), 2019-10-10
Supplement: c9mo00124g1.zip [file c9mo00124g1.zip › supplementary_file_6.xls]

## Sheet: Details
A network-based approach reveals novel invasion and Maurer’s clefts-related proteins in Plasmodium falciparum
Dibyajyoti Das, Sowmya Ramaswamy Krishnan, Arijit Roy* and Gopalakrishnan Bulusu*
TCS Innovation Labs – Hyderabad (Life Sciences Division), Tata Consultancy Services Limited, Hyderabad, India
* Corresponding author
E-mail: roy.arijit3@tcs.com, g.bulusu@tcs.com
Supplementary file 6: List of invasion and Maurer's clefts related proteins those were predicted by RWR method followed by permutation test but subsequently removed by enrichment test.
Each tab contains the below details:
GeneID as in PlasmoDB
p-value from the permutation test
RWR score from RWR test
Description of the gene
Details have been captured for Early Ring (ER), Late Ring (LR), Early Trophozoite (ET), Late Trophozoite (LT), Early Schizont (ES), Late Schizont (LS) and Merozoite (M)

## Sheet: Inv geneid removed
Genes Deleted in each stage Invasion
	GENEID	p-value	RWR score	Description
ER
1	PF3D7_1439500	0.037	0.000498135	CCAAT-binding transcription factor, putative
2	PF3D7_1117400	0.048	0.000154702	conserved Plasmodium protein, unknown function
3	PF3D7_0105400.2	0.042	0.000331869	conserved Plasmodium protein, unknown function
4	PF3D7_0404000	0.015	0.000312233	conserved Plasmodium protein, unknown function
5	PF3D7_0405200	0.03	0.000181984	ag-1 blood stage membrane protein homologue (MAg-1)
6	PF3D7_1318000	0.029	0.000130445	conserved Plasmodium membrane protein, unknown function
7	PF3D7_1476300	0.012	0.000129097	Plasmodium exported protein (PHISTb), unknown function
8	PF3D7_1243400	0.009	0.000249109	conserved Plasmodium protein, unknown function
9	PF3D7_0206800	0.009	0.000740636	merozoite surface protein 2 (MSP2)
10	PF3D7_1209400	0.038	0.000176777	cytosolic iron-sulfur protein assembly protein 1, putative (CIA1)
11	PF3D7_1010300	0.02	0.000150356	succinate dehydrogenase subunit 4, putative (SDH4)
12	PF3D7_1035200	0.013	0.000131883	S-antigen
LR
1	PF3D7_1243400	0.006	0.00027695	conserved Plasmodium protein, unknown function
2	PF3D7_1209400	0.027	0.00019253	cytosolic iron-sulfur protein assembly protein 1, putative (CIA1)
3	PF3D7_1240100	0.047	0.00026231	early transcribed membrane protein 12 (ETRAMP12)
4	PF3D7_0920500	0.046	0.000227745	ADP-ribosylation factor, putative
5	PF3D7_1010300	0.014	0.000172044	succinate dehydrogenase subunit 4, putative (SDH4)
6	PF3D7_1035200	0.015	0.00014724	S-antigen
7	PF3D7_0423900	0.038	0.000106194	probable protein, unknown function
ET
1	PF3D7_0405200	0.013	0.000367242	ag-1 blood stage membrane protein homologue (MAg-1)
2	PF3D7_1115800	0.012	0.000910649	conserved Plasmodium protein, unknown function
3	PF3D7_1240100	0.012	0.000673257	early transcribed membrane protein 12 (ETRAMP12)
4	PF3D7_1128900	0.032	0.000727166	conserved Plasmodium protein, unknown function
5	PF3D7_0811600	0.008	0.000198585	conserved Plasmodium protein, unknown function
6	PF3D7_0207000	0.016	0.00097328	merozoite surface protein 4 (MSP4)
7	PF3D7_0907500	0.018	0.000204381	conserved Plasmodium protein, unknown function
8	PF3D7_1469200	0.026	0.00153359	shewanella-like protein phosphatase 1, putative (SHLP1)
9	PF3D7_1439500	0.04	0.000801734	CCAAT-binding transcription factor, putative
10	PF3D7_1146600	0.012	0.000640059	CCAAT-box DNA binding protein subunit B (NFYB)
11	PF3D7_0403800	0.01	0.00184342	alpha/beta hydrolase, putative
12	PF3D7_1238900	0.005	0.00168925	protein kinase 2 (PK2)
13	PF3D7_0206800	0.005	0.00107157	merozoite surface protein 2 (MSP2)
14	PF3D7_0507300	0.016	0.000977104	conserved Plasmodium protein, unknown function
15	PF3D7_0203200	0.032	0.000936685	conserved Plasmodium protein, unknown function
16	PF3D7_0508100	0.022	0.000637589	SET domain protein, putative (SET9)
17	PF3D7_1320700	0.024	0.00061943	conserved Plasmodium protein, unknown function
18	PF3D7_0920500	0.019	0.000578964	ADP-ribosylation factor, putative
19	PF3D7_1010300	0.008	0.000444706	succinate dehydrogenase subunit 4, putative (SDH4)
20	PF3D7_1027300	0.014	0.000433009	peroxiredoxin (nPrx)
21	PF3D7_0934600	0.011	0.000410451	conserved Plasmodium protein, unknown function
22	PF3D7_1327300	0.032	0.000403343	conserved Plasmodium protein, unknown function
23	PF3D7_1401600	0.03	0.000369243	Plasmodium exported protein (PHISTb), unknown function
24	PF3D7_1334800	0.013	0.000327755	MSP7-like protein (MSRP2)
25	PF3D7_1209400	0.036	0.000302264	cytosolic iron-sulfur protein assembly protein 1, putative (CIA1)
26	PF3D7_0423900	0.008	0.000273526	probable protein, unknown function
27	PF3D7_1243400	0.015	0.000241875	conserved Plasmodium protein, unknown function
28	PF3D7_1117400	0.015	0.00021691	conserved Plasmodium protein, unknown function
29	PF3D7_1318000	0.016	0.000195029	conserved Plasmodium membrane protein, unknown function
30	PF3D7_1121600	0.04	0.000139554	exported protein 1 (EXP1)
LT
1	PF3D7_0212600	0.004	0.000963884	secreted protein with altered thrombospondin repeat domain (SPATR)
2	PF3D7_0203200	0.032	0.000781249	conserved Plasmodium protein, unknown function
3	PF3D7_1146600	0.021	0.000491115	CCAAT-box DNA binding protein subunit B (NFYB)
4	PF3D7_1035600	0.005	0.000487102	merozoite surface protein (H101)
5	PF3D7_0405200	0.006	0.000307105	ag-1 blood stage membrane protein homologue (MAg-1)
6	PF3D7_1117400	0.005	0.000230376	conserved Plasmodium protein, unknown function
7	PF3D7_1476300	0.005	0.000227777	Plasmodium exported protein (PHISTb), unknown function
8	PF3D7_1318000	0.012	0.000212989	conserved Plasmodium membrane protein, unknown function
9	PF3D7_0907500	0.035	0.000128124	conserved Plasmodium protein, unknown function
10	PF3D7_0935800	0.027	0.000100217	cytoadherence linked asexual protein 9 (CLAG9)
11	PF3D7_1420200	0.035	9.5752e-05	tetratricopeptide repeat family protein, putative
12	PF3D7_1240100	0.013	0.000482362	early transcribed membrane protein 12 (ETRAMP12)
13	PF3D7_0207000	0.005	0.000709861	merozoite surface protein 4 (MSP4)
14	PF3D7_1238900	0.007	0.000927309	protein kinase 2 (PK2)
15	PF3D7_0206800	0.01	0.000746979	merozoite surface protein 2 (MSP2)
16	PF3D7_0920500	0.022	0.000365152	ADP-ribosylation factor, putative
17	PF3D7_1010300	0.008	0.000279207	succinate dehydrogenase subunit 4, putative (SDH4)
18	PF3D7_1035200	0.013	0.000265451	S-antigen
19	PF3D7_1003100	0.046	0.00024174	conserved Plasmodium protein, unknown function
20	PF3D7_1423100	0.018	0.000219299	ankyrin, putative
21	PF3D7_0508500	0.044	0.00021485	guanidine nucleotide exchange factor (RCC1)
22	PF3D7_1243400	0.027	0.000178477	conserved Plasmodium protein, unknown function
23	PF3D7_1121600	0.039	0.000124676	exported protein 1 (EXP1)
24	PF3D7_0914400	0.022	0.000122992	conserved Plasmodium protein, unknown function
ES
1	PF3D7_0404000	0.009	0.000278303	conserved Plasmodium protein, unknown function
2	PF3D7_1476300	0.005	0.00011372	Plasmodium exported protein (PHISTb), unknown function
3	PF3D7_1318700	0.023	0.000327879	conserved Plasmodium protein, unknown function
4	PF3D7_0730400	0.017	0.000322542	conserved Plasmodium protein, unknown function
5	PF3D7_0105400.2	0.039	0.000290793	conserved Plasmodium protein, unknown function
6	PF3D7_1313500	0.049	0.000177227	conserved Plasmodium membrane protein, unknown function
7	PF3D7_0405200	0.032	0.000152342	ag-1 blood stage membrane protein homologue (MAg-1)
8	PF3D7_1318000	0.041	0.000107269	conserved Plasmodium membrane protein, unknown function
9	PF3D7_1243400	0.005	0.000225939	conserved Plasmodium protein, unknown function
10	PF3D7_0206800	0.019	0.000350209	merozoite surface protein 2 (MSP2)
11	PF3D7_1209400	0.029	0.000152375	cytosolic iron-sulfur protein assembly protein 1, putative (CIA1)
12	PF3D7_1010300	0.005	0.000136615	succinate dehydrogenase subunit 4, putative (SDH4)
13	PF3D7_1035200	0.008	0.00011562	S-antigen
LS
1	PF3D7_1318700	0.027	0.000306409	conserved Plasmodium protein, unknown function
2	PF3D7_0730400	0.026	0.000300906	conserved Plasmodium protein, unknown function
3	PF3D7_0105400.2	0.045	0.000274029	conserved Plasmodium protein, unknown function
4	PF3D7_0404000	0.021	0.000259936	conserved Plasmodium protein, unknown function
5	PF3D7_0405200	0.045	0.000146563	ag-1 blood stage membrane protein homologue (MAg-1)
6	PF3D7_1476300	0.016	0.000108306	Plasmodium exported protein (PHISTb), unknown function
7	PF3D7_1243400	0.01	0.000210787	conserved Plasmodium protein, unknown function
8	PF3D7_1209400	0.026	0.000142588	cytosolic iron-sulfur protein assembly protein 1, putative (CIA1)
9	PF3D7_1010300	0.011	0.000127838	succinate dehydrogenase subunit 4, putative (SDH4)
10	PF3D7_1035200	0.028	0.000111594	S-antigen
M
1	PF3D7_1318700	0.033	0.000336942	conserved Plasmodium protein, unknown function
2	PF3D7_0105400.2	0.049	0.000327995	conserved Plasmodium protein, unknown function
3	PF3D7_1476300	0.016	0.000139452	Plasmodium exported protein (PHISTb), unknown function
4	PF3D7_1318000	0.04	0.000138682	conserved Plasmodium membrane protein, unknown function
5	PF3D7_1243400	0.026	0.00023256	conserved Plasmodium protein, unknown function
6	PF3D7_0206800	0.018	0.000634405	merozoite surface protein 2 (MSP2)
7	PF3D7_1010300	0.015	0.000142936	succinate dehydrogenase subunit 4, putative (SDH4)
8	PF3D7_1035200	0.024	0.000114442	S-antigen
9	PF3D7_0623200	0.039	0.00010347	ferredoxin--NADP reductase (FNR)

## Sheet: MC_Gene_removed
Genes Deleted in each stage MC
	GENEID	p-value	RWR score	Description
ER
1	PF3D7_1322000	0.021	0.000904833	adenosine-diphosphatase, putative
2	PF3D7_0702300	0.031	0.000902233	sporozoite threonine and asparagine-rich protein (STARP)
3	PF3D7_1302100	0.027	0.00070559	gamete antigen 27/25 (G27/25)
4	PF3D7_1216500	0.04	0.000686327	male development gene 1 (MDV1)
5	PF3D7_0202600.2	0.019	0.000634146	conserved Plasmodium protein, unknown function
6	PF3D7_1102000	0.011	0.000605532	unspecified product
7	PF3D7_1205200	0.009	0.000351197	HAD domain ookinete protein, putative (HADO)
8	PF3D7_1007700	0.03	0.000279712	transcription factor with AP2 domain(s) (ApiAP2)
9	PF3D7_1031000	0.033	0.000273453	25 kDa ookinete surface antigen precursor (Pfs25)
10	PF3D7_1024800	0.049	0.000218502	conserved Plasmodium protein, unknown function
11	PF3D7_0530800	0.008	0.000213087	CPW-WPC family protein
12	PF3D7_0202400	0.036	0.000176452	gamete antigen 27/25, putative
13	PF3D7_0313500	0.04	0.000173383	GTP-binding protein EngA, putative
14	PF3D7_0702200	0.019	0.000170623	lysophospholipase, putative
15	PF3D7_0928600	0.018	0.000164989	conserved Plasmodium protein, unknown function
16	PF3D7_1218500	0.028	0.000137891	conserved Plasmodium protein, unknown function
17	PF3D7_0417300	0.014	0.000107482	LETM1-like protein, putative
LR
1	PF3D7_0417300	0.018	0.000101937	LETM1-like protein, putative
2	PF3D7_0702300	0.025	0.00086644	sporozoite threonine and asparagine-rich protein (STARP)
3	PF3D7_1322000	0.026	0.000853894	adenosine-diphosphatase, putative
4	PF3D7_0801000	0.039	0.000699852	Plasmodium exported protein (PHISTc), unknown function
5	PF3D7_1302100	0.045	0.000643929	gamete antigen 27/25 (G27/25)
6	PF3D7_0202600.2	0.03	0.000452205	conserved Plasmodium protein, unknown function
7	PF3D7_1102000	0.02	0.000441938	unspecified product
8	PF3D7_1401200	0.047	0.000439004	Plasmodium exported protein, unknown function
9	PF3D7_1246700	0.01	0.000433365	conserved Plasmodium protein, unknown function
10	PF3D7_1031000	0.034	0.000245972	25 kDa ookinete surface antigen precursor (Pfs25)
11	PF3D7_1252300	0.049	0.000229646	conserved Plasmodium protein, unknown function
12	PF3D7_0313500	0.04	0.00021467	GTP-binding protein EngA, putative
13	PF3D7_1340400	0.011	0.000201732	conserved Plasmodium protein, unknown function
14	PF3D7_1250100	0.027	0.000192745	osmiophilic body protein (G377)
15	PF3D7_0702200	0.022	0.000173024	lysophospholipase, putative
16	PF3D7_0936200	0.031	0.000161327	Plasmodium exported protein (hyp11), unknown function
17	PF3D7_0202400	0.046	0.000147216	gamete antigen 27/25, putative
18	PF3D7_1218500	0.035	0.000127192	conserved Plasmodium protein, unknown function
19	PF3D7_1303300	0.05	0.00012209	conserved Plasmodium protein, unknown function
20	PF3D7_0104200	0.046	0.000117997	StAR-related lipid transfer protein
ET
1	PF3D7_0408700	0.017	0.000560941	sporozoite micronemal protein essential for cell traversal (PLP1)
2	PF3D7_0417300	0.021	0.000102957	LETM1-like protein, putative
3	PF3D7_0104200	0.05	0.000122885	StAR-related lipid transfer protein
4	PF3D7_0702300	0.032	0.000882749	sporozoite threonine and asparagine-rich protein (STARP)
5	PF3D7_1322000	0.036	0.000866482	adenosine-diphosphatase, putative
6	PF3D7_1302100	0.044	0.000834125	gamete antigen 27/25 (G27/25)
7	PF3D7_1102000	0.014	0.000599372	unspecified product
8	PF3D7_1033900	0.023	0.000595584	ubiquitin-conjugating enzyme, putative
9	PF3D7_1334300	0.02	0.000278168	MSP7-like protein (MSRP5)
10	PF3D7_1007700	0.03	0.000267672	transcription factor with AP2 domain(s) (ApiAP2)
11	PF3D7_1246700	0.015	0.000248862	conserved Plasmodium protein, unknown function
12	PF3D7_1024900	0.012	0.000243073	conserved Plasmodium protein, unknown function
13	PF3D7_0530800	0.007	0.000203702	CPW-WPC family protein
14	PF3D7_1222600	0.04	0.000183642	transcription factor with AP2 domain(s) (AP2-G)
15	PF3D7_0702200	0.018	0.000178542	lysophospholipase, putative
16	PF3D7_0202400	0.039	0.000157334	gamete antigen 27/25, putative
17	PF3D7_0928600	0.024	0.000151454	conserved Plasmodium protein, unknown function
18	PF3D7_1001100.2	0.047	0.000142159	acyl-CoA binding protein, isoform 1, ACBP1 (ACBP1)
19	PF3D7_1217300	0.036	0.000137133	GTP-binding protein, putative
20	PF3D7_0313500	0.031	0.000136896	GTP-binding protein EngA, putative
21	PF3D7_1218500	0.045	0.000131276	conserved Plasmodium protein, unknown function
LT
1	PF3D7_1116700	0.05	0.000321762	dipeptidyl aminopeptidase 1 (DPAP1)
2	PF3D7_1302100	0.021	0.000736087	gamete antigen 27/25 (G27/25)
3	PF3D7_1216500	0.026	0.000709345	male development gene 1 (MDV1)
4	PF3D7_0202600.2	0.014	0.000442769	conserved Plasmodium protein, unknown function
5	PF3D7_1102000	0.01	0.000432717	unspecified product
6	PF3D7_0703300	0.039	0.000342771	conserved Plasmodium protein, unknown function
7	PF3D7_1476500	0.045	0.00033623	probable protein, unknown function
8	PF3D7_1205200	0.023	0.000327573	HAD domain ookinete protein, putative (HADO)
9	PF3D7_1007700	0.035	0.000261288	transcription factor with AP2 domain(s) (ApiAP2)
10	PF3D7_1246700	0.014	0.000241059	conserved Plasmodium protein, unknown function
11	PF3D7_1024900	0.007	0.000235454	conserved Plasmodium protein, unknown function
12	PF3D7_1252300	0.041	0.000223392	conserved Plasmodium protein, unknown function
13	PF3D7_0530800	0.022	0.000190778	CPW-WPC family protein
14	PF3D7_1340400	0.022	0.000190778	conserved Plasmodium protein, unknown function
15	PF3D7_0928600	0.02	0.000146279	conserved Plasmodium protein, unknown function
16	PF3D7_1218500	0.037	0.00014359	conserved Plasmodium protein, unknown function
17	PF3D7_0202400	0.037	0.000137193	gamete antigen 27/25, putative
18	PF3D7_1217300	0.037	0.000132656	GTP-binding protein, putative
19	PF3D7_0313500	0.026	0.000132376	GTP-binding protein EngA, putative
20	PF3D7_1303300	0.033	0.000111913	conserved Plasmodium protein, unknown function
21	PF3D7_1476200	0	0.000841306	Plasmodium exported protein (PHISTb), unknown function
22	PF3D7_1016800	0	0.000577367	Plasmodium exported protein (PHISTc), unknown function
23	PF3D7_1001400	0	0.000540804	alpha/beta hydrolase, putative
24	PF3D7_0402100	0	0.000521408	Plasmodium exported protein (PHISTb), unknown function
25	PF3D7_0502400	0	0.00027461	merozoite surface protein 8 (MSP8)
26	PF3D7_1114200	0	0.000183763	GTPase-activating protein, putative
27	PF3D7_1476000	0	0.000112666	conserved Plasmodium protein, unknown function
28	PF3D7_1225400	0	0.000111518	conserved Plasmodium protein, unknown function
29	PF3D7_1016700	0	0.000103478	Plasmodium exported protein (PHISTc), unknown function
30	PF3D7_0301800	0	0.000101816	Plasmodium exported protein, unknown function
31	PF3D7_0202100	0.024	0.000100631	liver stage associated protein 2 (LSAP2)
ES
1	PF3D7_1346700	0.021	0.000276487	6-cysteine protein (P48/45)
2	PF3D7_0417300	0.023	0.000105296	LETM1-like protein, putative
3	PF3D7_0801000	0.035	0.0010147	Plasmodium exported protein (PHISTc), unknown function
4	PF3D7_0112900	0.01	0.000978602	Plasmodium exported protein, unknown function
5	PF3D7_1302100	0.025	0.000777622	gamete antigen 27/25 (G27/25)
6	PF3D7_1216500	0.039	0.000748869	male development gene 1 (MDV1)
7	PF3D7_0202600.2	0.022	0.000466921	conserved Plasmodium protein, unknown function
8	PF3D7_1102000	0.016	0.00045632	unspecified product
9	PF3D7_1411900	0.05	0.00042824	p1/s1 nuclease, putative
10	PF3D7_1205200	0.021	0.000345763	HAD domain ookinete protein, putative (HADO)
11	PF3D7_0716200	0.048	0.000345021	conserved Plasmodium protein, unknown function
12	PF3D7_1246700	0.015	0.00030101	conserved Plasmodium protein, unknown function
13	PF3D7_1024900	0.007	0.00029402	conserved Plasmodium protein, unknown function
14	PF3D7_1007700	0.029	0.000274205	transcription factor with AP2 domain(s) (ApiAP2)
15	PF3D7_0702200	0.017	0.000258457	lysophospholipase, putative
16	PF3D7_1252300	0.029	0.000251401	conserved Plasmodium protein, unknown function
17	PF3D7_0202400	0.027	0.000180396	gamete antigen 27/25, putative
18	PF3D7_0928600	0.033	0.000177711	conserved Plasmodium protein, unknown function
19	PF3D7_1252600	0.046	0.000174327	lysophospholipase, putative
20	PF3D7_1330800	0.043	0.000173499	conserved Plasmodium protein, unknown function
21	PF3D7_0831800	0.01	0.000156857	histidine-rich protein II (HRPII)
22	PF3D7_1218500	0.033	0.000155739	conserved Plasmodium protein, unknown function
23	PF3D7_0202100	0.011	0.000129756	liver stage associated protein 2 (LSAP2)
24	PF3D7_0104200	0.034	0.000120759	StAR-related lipid transfer protein
25	PF3D7_0530800	0.017	0.000208363	CPW-WPC family protein
LS
1	PF3D7_0417300	0.02	0.000106475	LETM1-like protein, putative
2	PF3D7_1302100	0.034	0.000734328	gamete antigen 27/25 (G27/25)
3	PF3D7_0202600.2	0.016	0.000622428	conserved Plasmodium protein, unknown function
4	PF3D7_1102000	0.019	0.000608296	unspecified product
5	PF3D7_1029200	0.027	0.000489084	WD repeat-containing protein, putative
6	PF3D7_0113000	0.047	0.000477787	glutamic acid-rich protein (GARP)
7	PF3D7_0319700	0.046	0.0004578	ABC transporter I family member 1, putative (ABCI3)
8	PF3D7_1246700	0.01	0.000362553	conserved Plasmodium protein, unknown function
9	PF3D7_1205200	0.012	0.000347169	HAD domain ookinete protein, putative (HADO)
10	PF3D7_1007700	0.034	0.000321527	transcription factor with AP2 domain(s) (ApiAP2)
11	PF3D7_1252300	0.04	0.000269346	conserved Plasmodium protein, unknown function
12	PF3D7_1250100	0.024	0.000248174	osmiophilic body protein (G377)
13	PF3D7_1024800	0.047	0.000229078	conserved Plasmodium protein, unknown function
14	PF3D7_0530800	0.014	0.000210855	CPW-WPC family protein
15	PF3D7_0702200	0.028	0.000206415	lysophospholipase, putative
16	PF3D7_1222600	0.03	0.000206299	transcription factor with AP2 domain(s) (AP2-G)
17	PF3D7_0202400	0.022	0.000194071	gamete antigen 27/25, putative
18	PF3D7_1330800	0.05	0.000186033	conserved Plasmodium protein, unknown function
19	PF3D7_1401500	0.044	0.000184407	lysophospholipase, putative
20	PF3D7_1218500	0.038	0.000134433	conserved Plasmodium protein, unknown function
M
1	PF3D7_0417300	0.023	0.000129645	LETM1-like protein, putative
2	PF3D7_1322000	0.023	0.00208003	adenosine-diphosphatase, putative
3	PF3D7_0702300	0.042	0.00101675	sporozoite threonine and asparagine-rich protein (STARP)
4	PF3D7_1302100	0.038	0.000842142	gamete antigen 27/25 (G27/25)
5	PF3D7_0202600.2	0.016	0.000708775	conserved Plasmodium protein, unknown function
6	PF3D7_1102000	0.033	0.000698335	unspecified product
7	PF3D7_1007700	0.041	0.000545884	transcription factor with AP2 domain(s) (ApiAP2)
8	PF3D7_1205200	0.013	0.000472566	HAD domain ookinete protein, putative (HADO)
9	PF3D7_0530800	0.017	0.000241381	CPW-WPC family protein
10	PF3D7_1222600	0.027	0.000198321	transcription factor with AP2 domain(s) (AP2-G)
11	PF3D7_0702200	0.029	0.000190595	lysophospholipase, putative
12	PF3D7_1218500	0.039	0.000157525	conserved Plasmodium protein, unknown function
13	PF3D7_0202100	0.033	0.000121579	liver stage associated protein 2 (LSAP2)
14	PF3D7_1459400	0.014	0.000106283	conserved Plasmodium protein, unknown function
15	PF3D7_0513600	0.037	0.000103349	deoxyribodipyrimidine photo-lyase, putative
16	PF3D7_1351800.2	0.034	0.000100396	conserved Plasmodium protein, unknown function
