# Supplementary material for: A network-based approach reveals novel invasion and Maurer's clefts-related proteins in Plasmodium falciparum
Source: Royal Society of Chemistry journal article supplement (doi:10.1039/c9mo00124g), 2019-10-10
Supplement: c9mo00124g1.zip [file c9mo00124g1.zip › supplementary_file_7.xls]

## Sheet: Details
A network-based approach reveals novel invasion and Maurer’s clefts-related proteins in Plasmodium falciparum
Dibyajyoti Das, Sowmya Ramaswamy Krishnan, Arijit Roy* and Gopalakrishnan Bulusu*
TCS Innovation Labs – Hyderabad (Life Sciences Division), Tata Consultancy Services Limited, Hyderabad, India
* Corresponding author
E-mail: roy.arijit3@tcs.com, g.bulusu@tcs.com
Supplementary file 7: Maurer's clefts related seed and predicted proteins (along with PF id, description) during each stage of intra-erythorocytic cycle. For predicted proteins, corresponding RWR score and p-values are also shown.
Tabs referring to stage specific results of Early Ring (ER), Late Ring (LR), Early Trophozoite (ET), Late Trophozoite (LT), Early Schizont (ES), Late Schizont (LS) and Merozoite (M)
Each tab contains the below details:
GeneID as in PlasmoDB
Seed/Predicted mentioning if the gene was part of the seed list or predicted using the RWR algorithm
p-value obtained from permutation test
RWR score as per the RWR algorithm. All predicted genes are ranked based on their RWR score
Description of the gene

## Sheet: ER
GeneID	Seed/Predicted	p-value	RWR Score	Description
PF3D7_0731300	SEED			Plasmodium exported protein (PHISTb), unknown function (PfG174)
PF3D7_0423700	SEED			early transcribed membrane protein 4 (ETRAMP4)
PF3D7_0102200	SEED			ring-infected erythrocyte surface antigen (RESA)
PF3D7_0501300	SEED			skeleton-binding protein 1 (SBP1)
PF3D7_1134000	SEED			heat shock protein 70 (HSP70-3)
PF3D7_1370300	SEED			membrane associated histidine-rich protein (MAHRP1)
PF3D7_0201900	SEED			erythrocyte membrane protein 3 (EMP3)
PF3D7_0202000	SEED			knob-associated histidine-rich protein (KAHRP)
PF3D7_1102700	SEED			early transcribed membrane protein 11.1 (ETRAMP11.1)
PF3D7_0936300	SEED			ring-exported protein 3 (REX3)
PF3D7_1002100	SEED			EMP1-trafficking protein (PTP5)
PF3D7_1324900	SEED			L-lactate dehydrogenase (LDH)
PF3D7_0708400	SEED			heat shock protein 90 (HSP90)
PF3D7_0532400	SEED			lysine-rich membrane-associated PHISTb protein (LyMP)
PF3D7_0202500	SEED			early transcribed membrane protein 2 (ETRAMP2)
PF3D7_1401400	SEED			early transcribed membrane protein 14.1 (ETRAMP14)
PF3D7_1478600	SEED			EMP1-trafficking protein (PTP3)
PF3D7_1001500	SEED			early transcribed membrane protein 10.1 (ETRAMP10)
PF3D7_0818900	SEED			heat shock protein 70 (HSP70)
PF3D7_1033200	SEED			early transcribed membrane protein 10.2 (ETRAMP10.2)
PF3D7_1439900	SEED			triosephosphate isomerase (TIM)
PF3D7_0936400	SEED			ring-exported protein 4 (REX4)
PF3D7_1001900	SEED			Plasmodium exported protein (hyp16), unknown function (PfJ23)
PF3D7_1302000	SEED			EMP1-trafficking protein (PTP6)
PF3D7_1016900	SEED			early transcribed membrane protein 10.3 (ETRAMP10.3)
PF3D7_1015900	SEED			enolase (ENO)
PF3D7_0501100.2	SEED			heat shock protein 40, type II (HSP40)
PF3D7_0822600	SEED			protein transport protein SEC23 (SEC23)
PF3D7_1353200	SEED			membrane associated histidine-rich protein (MAHRP2)
PF3D7_0730900	SEED			EMP1-trafficking protein (PTP4)
PF3D7_0935900	SEED			ring-exported protein 1 (REX1)
PF3D7_0532300	SEED			Plasmodium exported protein (PHISTb), unknown function
PF3D7_0214100	SEED			protein transport protein SEC31 (SEC31)
PF3D7_1462800	SEED			glyceraldehyde-3-phosphate dehydrogenase (GAPDH)
PF3D7_0406200	SEED			sexual stage-specific protein precursor (Pfs16)
PF3D7_0626800	SEED			pyruvate kinase (PyrK)
PF3D7_0513300	SEED			purine nucleoside phosphorylase (PNP)
PF3D7_0826700	SEED			receptor for activated c kinase (RACK)
PF3D7_0201600	SEED			PHISTb domain-containing RESA-like protein 1 (RLP1)
PF3D7_0532100	SEED			early transcribed membrane protein 5 (ETRAMP5)
PF3D7_0917900	SEED			heat shock protein 70 (HSP70-2)
PF3D7_0501000	SEED			Plasmodium exported protein, unknown function
PF3D7_0401800	SEED			Plasmodium exported protein (PHISTb), unknown function (PfD80)
PF3D7_0202200	SEED			EMP1-trafficking protein (PTP1)
PF3D7_0114100	SEED			Pfmc-2TM Maurer-s cleft two transmembrane protein (MC-2TM)
PF3D7_0731100	SEED			EMP1-trafficking protein (PTP2)
PF3D7_0416800	SEED			small GTP-binding protein sar1 (SAR1)
PF3D7_1102800	SEED			early transcribed membrane protein 11.2 (ETRAMP11.2)
PF3D7_0929400	SEED			high molecular weight rhoptry protein 2 (RhopH2)
PF3D7_1201000	SEED			Plasmodium exported protein (PHISTb), unknown function
PF3D7_0207600	SEED			serine repeat antigen 5 (SERA5)
PF3D7_1471100	SEED			exported protein 2 (EXP2)
PF3D7_1240100	SEED			early transcribed membrane protein 12 (ETRAMP12)
PF3D7_1012400	SEED			hypoxanthine-guanine phosphoribosyltransferase (HGPRT)
PF3D7_0905400	SEED			high molecular weight rhoptry protein 3 (RhopH3)
PF3D7_1222300	SEED			endoplasmin, putative (GRP94)
PF3D7_0424600	SEED			Plasmodium exported protein (PHISTb), unknown function
PF3D7_0501500	SEED			rhoptry-associated protein 3 (RAP3)
PF3D7_0501200	SEED			parasite-infected erythrocyte surface protein (PIESP2)
PF3D7_1228600	SEED			merozoite surface protein 9 (MSP9)
PF3D7_1121600	SEED			exported protein 1 (EXP1)
PF3D7_1038400	SEED			gametocyte-specific protein (Pf11-1)
PF3D7_1444800	SEED			fructose-bisphosphate aldolase (FBPA)
PF3D7_0207500	SEED			serine repeat antigen 6 (SERA6)
PF3D7_1229400	SEED			macrophage migration inhibitory factor (MIF)
PF3D7_1016300	SEED			glycophorin binding protein (GBP)
PF3D7_0818200	SEED			14-3-3 protein (14-3-3I)
PF3D7_1335100	SEED			merozoite surface protein 7 (MSP7)
PF3D7_0827900	SEED			protein disulfide isomerase (PDI8)
PF3D7_0310400	SEED			parasite-infected erythrocyte surface protein (PIESP1)
PF3D7_0302500	SEED			cytoadherence linked asexual protein 3.1 (CLAG3.1)
PF3D7_1008900	SEED			adenylate kinase (AK1)
PF3D7_0302200	SEED			cytoadherence linked asexual protein 3.2 (CLAG3.2)
PF3D7_0702100	SEED			Plasmodium exported protein (PHISTb), unknown function, pseudogene
PF3D7_0303000	SEED			N-ethylmaleimide-sensitive fusion protein (NSF)
PF3D7_0935800	SEED			cytoadherence linked asexual protein 9 (CLAG9)
PF3D7_1117700	SEED			GTP-binding nuclear protein RAN/TC4 (RAN)
PF3D7_0717600	SEED			conserved Plasmodium protein, unknown function
PF3D7_1456800	SEED			V-type H(+)-translocating pyrophosphatase, putative (VP1)
PF3D7_0702400	SEED			small exported membrane protein 1 (SEMP1)
PF3D7_1437800	SEED			trafficking protein particle complex subunit 5, putative (TRAPPC5)
PF3D7_1037300	SEED			ADP/ATP transporter on adenylate translocase (ADT)
PF3D7_1479000	SEED			acyl-CoA synthetase (ACS1a)
PF3D7_1343000	SEED			phosphoethanolamine N-methyltransferase (PMT)
PF3D7_1216200	SEED			glycerol-3-phosphate dehydrogenase, putative
PF3D7_1301200	SEED			glycophorin binding protein (GBPH2)
PF3D7_0312400	SEED			glycogen synthase kinase 3 (GSK3)
PF3D7_1414400	SEED			serine/threonine protein phosphatase PP1 (PP1)
PF3D7_1445700	SEED			conserved Plasmodium protein, unknown function
PF3D7_0631900	PREDICTED	0.01	0.00187266	stevor
PF3D7_0936800	PREDICTED	0.021	0.00165782	Plasmodium exported protein (PHISTc), unknown function
PF3D7_0830500	PREDICTED	0.044	0.00109068	tryptophan/threonine-rich antigen (TryThrA)
PF3D7_1301400	PREDICTED	0.068	0.00107771	Plasmodium exported protein (hyp12), unknown function (HYP12)
PF3D7_1244200	PREDICTED	0.02	0.000941256	RNA polymerase II transcription factor B subunit 2, putative (TFB2)
PF3D7_0730800.2	PREDICTED	0.044	0.000902557	Plasmodium exported protein, unknown function
PF3D7_0402000	PREDICTED	0.088	0.000899505	Plasmodium exported protein (PHISTa), unknown function
PF3D7_1476200	PREDICTED	0.06	0.000883078	Plasmodium exported protein (PHISTb), unknown function
PF3D7_1404800	PREDICTED	0.039	0.000875711	conserved Plasmodium protein, unknown function
PF3D7_1401100	PREDICTED	0.011	0.000851844	DnaJ protein, putative
PF3D7_1436000	PREDICTED	0.074	0.000843185	glucose-6-phosphate isomerase (GPI)
PF3D7_0500800	PREDICTED	0.031	0.000775074	mature parasite-infected erythrocyte surface antigen (MESA)
PF3D7_0935600	PREDICTED	0.026	0.000758577	gametocytogenesis-implicated protein (GIG)
PF3D7_0801000	PREDICTED	0.037	0.000748347	Plasmodium exported protein (PHISTc), unknown function
PF3D7_0512600	PREDICTED	0.09	0.000744286	ras-related protein Rab-1B (RAB1b)
PF3D7_0830600	PREDICTED	0.038	0.000733871	Plasmodium exported protein (PHISTc), unknown function
PF3D7_0201800	PREDICTED	0.029	0.00072268	knob associated heat shock protein 40 (KAHsp40)
PF3D7_1301700	PREDICTED	0.041	0.000702282	Plasmodium exported protein (hyp8), unknown function (GEXP07)
PF3D7_0108500	PREDICTED	0.036	0.000690317	conserved Plasmodium protein, unknown function
PF3D7_1301700	PREDICTED	0.068	0.000675436	Plasmodium exported protein (hyp8), unknown function (GEXP07)
PF3D7_1204300	PREDICTED	0.043	0.000664135	eukaryotic translation initiation factor 5A (EIF5A)
PF3D7_1149200	PREDICTED	0.039	0.000631321	ring-infected erythrocyte surface antigen
PF3D7_0201700	PREDICTED	0.034	0.0006157	DnaJ protein, putative
PF3D7_1200700	PREDICTED	0.045	0.000614103	acyl-CoA synthetase (ACS7)
PF3D7_1149600	PREDICTED	0.07	0.000610579	DnaJ protein, putative
PF3D7_1149200	PREDICTED	0.059	0.000600016	ring-infected erythrocyte surface antigen
PF3D7_0424700	PREDICTED	0.079	0.000597792	serine/threonine protein kinase, FIKK family (FIKK4.2)
PF3D7_1148900	PREDICTED	0.035	0.000595313	Plasmodium exported protein, unknown function
PF3D7_1347200	PREDICTED	0.035	0.000594493	nucleoside transporter 1 (NT1)
PF3D7_0301600	PREDICTED	0.013	0.000594349	Plasmodium exported protein (hyp1), unknown function (GEXP21)
PF3D7_1361100	PREDICTED	0.041	0.000590679	protein transport protein Sec24A (SEC24A)
PF3D7_0501400	PREDICTED	0.029	0.000589895	interspersed repeat antigen (FIRA)
PF3D7_0922500	PREDICTED	0.046	0.000588807	phosphoglycerate kinase (PGK)
PF3D7_0405100	PREDICTED	0.04	0.000573409	protein transport protein Sec24B (SEC24B)
PF3D7_1352900	PREDICTED	0.037	0.000566783	Plasmodium exported protein, unknown function
PF3D7_1230700	PREDICTED	0.061	0.000560952	protein transport protein SEC13 (SEC13)
PF3D7_0201500	PREDICTED	0.041	0.000558359	Plasmodium exported protein (hyp9), unknown function
PF3D7_0322000	PREDICTED	0.049	0.000556132	peptidyl-prolyl cis-trans isomerase (CYP19A)
PF3D7_1115800	PREDICTED	0.042	0.000537922	conserved Plasmodium protein, unknown function
PF3D7_0322000	PREDICTED	0.055	0.000529629	peptidyl-prolyl cis-trans isomerase (CYP19A)
PF3D7_0701900	PREDICTED	0.041	0.000495131	Plasmodium exported protein, unknown function
PF3D7_1120100	PREDICTED	0.049	0.000461925	phosphoglycerate mutase, putative (PGM1)
PF3D7_1017100	PREDICTED	0.047	0.000450817	rhoptry neck protein 12 (RON12)
PF3D7_0922200	PREDICTED	0.046	0.000449447	S-adenosylmethionine synthetase (SAMS)
PF3D7_1033900	PREDICTED	0.029	0.000430192	ubiquitin-conjugating enzyme, putative
PF3D7_1332300	PREDICTED	0.029	0.000430016	trafficking protein particle complex subunit 2, putative (TRAPPC2)
PF3D7_0310700	PREDICTED	0.033	0.000429021	trafficking protein particle complex subunit 4, putative
PF3D7_0936600	PREDICTED	0.022	0.000424865	Plasmodium exported protein (PHISTc), unknown function (GEXP05)
PF3D7_1253300	PREDICTED	0.028	0.000421819	Plasmodium exported protein (PHISTa), unknown function, pseudogene
PF3D7_0532600	PREDICTED	0.019	0.000368746	Plasmodium exported protein, unknown function
PF3D7_1029600	PREDICTED	0.039	0.000355513	adenosine deaminase (ADA)
PF3D7_1200600	PREDICTED	0.048	0.000334697	erythrocyte membrane protein 1, PfEMP1 (VAR2CSA)
PF3D7_0935500	PREDICTED	0.028	0.00033058	Plasmodium exported protein, unknown function (GEXP22)
PF3D7_0800900	PREDICTED	0.044	0.000324335	Plasmodium exported protein (hyp7), unknown function, pseudogene
PF3D7_1253100	PREDICTED	0.04	0.000320774	Plasmodium exported protein (PHISTa), unknown function
PF3D7_0220200	PREDICTED	0.023	0.00031948	Plasmodium exported protein, unknown function
PF3D7_0711500	PREDICTED	0.044	0.000319161	regulator of chromosome condensation, putative
PF3D7_1148700	PREDICTED	0.047	0.000318517	Plasmodium exported protein (PHISTc), unknown function (GEXP12)
PF3D7_1478000	PREDICTED	0.048	0.00028271	Plasmodium exported protein (PHISTa), unknown function (GEXP17)
PF3D7_1372200	PREDICTED	0.021	0.000272488	histidine-rich protein III (HRPIII)
PF3D7_1039000	PREDICTED	0.048	0.000255155	serine/threonine protein kinase, FIKK family (FIKK10.2)
PF3D7_0913200	PREDICTED	0.032	0.000251033	elongation factor 1-beta (EF-1beta)
PF3D7_1108600	PREDICTED	0.041	0.00024001	endoplasmic reticulum-resident calcium binding protein (ERC)
PF3D7_1132800	PREDICTED	0.049	0.000235044	aquaglyceroporin (AQP)
PF3D7_1401800	PREDICTED	0.036	0.000228031	choline kinase (CK)
PF3D7_1124600	PREDICTED	0.045	0.000227052	ethanolamine kinase (EK)
PF3D7_1351600	PREDICTED	0.047	0.000223332	glycerol kinase (GK)
PF3D7_1346700	PREDICTED	0.025	0.00022278	6-cysteine protein (P48/45)
PF3D7_0525100	PREDICTED	0.042	0.000200814	acyl-CoA synthetase (ACS10)
PF3D7_1253400	PREDICTED	0.042	0.000200676	acyl-CoA synthetase (ACS3)
PF3D7_0936200	PREDICTED	0.022	0.000194552	Plasmodium exported protein (hyp11), unknown function
PF3D7_1444300	PREDICTED	0.046	0.000189564	1-acyl-sn-glycerol-3-phosphate acyltransferase, putative (LPAAT)
PF3D7_0424000	PREDICTED	0.034	0.000186972	Plasmodium exported protein (PHISTc), unknown function
PF3D7_0221700	PREDICTED	0.03	0.00016031	Plasmodium exported protein, unknown function
PF3D7_1404100	PREDICTED	0.037	0.000158909	cytochrome c, putative
PF3D7_0831800	PREDICTED	0.021	0.000152836	histidine-rich protein II (HRPII)
PF3D7_1016400	PREDICTED	0.047	0.000145135	serine/threonine protein kinase, FIKK family (FIKK10.1)
PF3D7_1473200	PREDICTED	0.044	0.000136485	DnaJ protein, putative
PF3D7_1329400	PREDICTED	0.04	0.000116364	AMP deaminase, putative
PF3D7_0914000	PREDICTED	0.029	0.000101551	pseudouridylate synthase, putative
PF3D7_0705900	PREDICTED	0.029	0.000101499	ATP synthase subunit C, putative

## Sheet: LR
GeneID	Seed/Predicted	p-value	RWR Score	Description
PF3D7_0731300	SEED			Plasmodium exported protein (PHISTb), unknown function (PfG174)
PF3D7_1001000	SEED			Plasmodium exported protein (hyp12), unknown function (PfJ13)
PF3D7_0201600	SEED			PHISTb domain-containing RESA-like protein 1 (RLP1)
PF3D7_0102200	SEED			ring-infected erythrocyte surface antigen (RESA)
PF3D7_0423700	SEED			early transcribed membrane protein 4 (ETRAMP4)
PF3D7_0501300	SEED			skeleton-binding protein 1 (SBP1)
PF3D7_1134000	SEED			heat shock protein 70 (HSP70-3)
PF3D7_1001500	SEED			early transcribed membrane protein 10.1 (ETRAMP10)
PF3D7_0201900	SEED			erythrocyte membrane protein 3 (EMP3)
PF3D7_0202000	SEED			knob-associated histidine-rich protein (KAHRP)
PF3D7_1149000	SEED			antigen 332, DBL-like protein (Pf332)
PF3D7_1370300	SEED			membrane associated histidine-rich protein (MAHRP1)
PF3D7_1102700	SEED			early transcribed membrane protein 11.1 (ETRAMP11.1)
PF3D7_0532400	SEED			lysine-rich membrane-associated PHISTb protein (LyMP)
PF3D7_0936300	SEED			ring-exported protein 3 (REX3)
PF3D7_1002100	SEED			EMP1-trafficking protein (PTP5)
PF3D7_1324900	SEED			L-lactate dehydrogenase (LDH)
PF3D7_0708400	SEED			heat shock protein 90 (HSP90)
PF3D7_1001900	SEED			Plasmodium exported protein (hyp16), unknown function (PfJ23)
PF3D7_0202500	SEED			early transcribed membrane protein 2 (ETRAMP2)
PF3D7_1401400	SEED			early transcribed membrane protein 14.1 (ETRAMP14)
PF3D7_0818900	SEED			heat shock protein 70 (HSP70)
PF3D7_1478600	SEED			EMP1-trafficking protein (PTP3)
PF3D7_1201000	SEED			Plasmodium exported protein (PHISTb), unknown function
PF3D7_1033200	SEED			early transcribed membrane protein 10.2 (ETRAMP10.2)
PF3D7_1439900	SEED			triosephosphate isomerase (TIM)
PF3D7_1016900	SEED			early transcribed membrane protein 10.3 (ETRAMP10.3)
PF3D7_1302000	SEED			EMP1-trafficking protein (PTP6)
PF3D7_1015900	SEED			enolase (ENO)
PF3D7_0501100.2	SEED			heat shock protein 40, type II (HSP40)
PF3D7_0936400	SEED			ring-exported protein 4 (REX4)
PF3D7_1353200	SEED			membrane associated histidine-rich protein (MAHRP2)
PF3D7_0822600	SEED			protein transport protein SEC23 (SEC23)
PF3D7_0730900	SEED			EMP1-trafficking protein (PTP4)
PF3D7_0532300	SEED			Plasmodium exported protein (PHISTb), unknown function
PF3D7_0214100	SEED			protein transport protein SEC31 (SEC31)
PF3D7_0401800	SEED			Plasmodium exported protein (PHISTb), unknown function (PfD80)
PF3D7_0935900	SEED			ring-exported protein 1 (REX1)
PF3D7_1462800	SEED			glyceraldehyde-3-phosphate dehydrogenase (GAPDH)
PF3D7_0406200	SEED			sexual stage-specific protein precursor (Pfs16)
PF3D7_0626800	SEED			pyruvate kinase (PyrK)
PF3D7_0513300	SEED			purine nucleoside phosphorylase (PNP)
PF3D7_0826700	SEED			receptor for activated c kinase (RACK)
PF3D7_0501200	SEED			parasite-infected erythrocyte surface protein (PIESP2)
PF3D7_0532100	SEED			early transcribed membrane protein 5 (ETRAMP5)
PF3D7_0917900	SEED			heat shock protein 70 (HSP70-2)
PF3D7_0501000	SEED			Plasmodium exported protein, unknown function
PF3D7_0731100	SEED			EMP1-trafficking protein (PTP2)
PF3D7_0202200	SEED			EMP1-trafficking protein (PTP1)
PF3D7_0929400	SEED			high molecular weight rhoptry protein 2 (RhopH2)
PF3D7_0416800	SEED			small GTP-binding protein sar1 (SAR1)
PF3D7_1102800	SEED			early transcribed membrane protein 11.2 (ETRAMP11.2)
PF3D7_0905400	SEED			high molecular weight rhoptry protein 3 (RhopH3)
PF3D7_1240100	SEED			early transcribed membrane protein 12 (ETRAMP12)
PF3D7_0207600	SEED			serine repeat antigen 5 (SERA5)
PF3D7_1471100	SEED			exported protein 2 (EXP2)
PF3D7_1012400	SEED			hypoxanthine-guanine phosphoribosyltransferase (HGPRT)
PF3D7_0424600	SEED			Plasmodium exported protein (PHISTb), unknown function
PF3D7_1222300	SEED			endoplasmin, putative (GRP94)
PF3D7_0501500	SEED			rhoptry-associated protein 3 (RAP3)
PF3D7_1038400	SEED			gametocyte-specific protein (Pf11-1)
PF3D7_0101300	SEED			Pfmc-2TM Maurer-s cleft two transmembrane protein (MC-2TM)
PF3D7_1228600	SEED			merozoite surface protein 9 (MSP9)
PF3D7_1121600	SEED			exported protein 1 (EXP1)
PF3D7_1444800	SEED			fructose-bisphosphate aldolase (FBPA)
PF3D7_1229400	SEED			macrophage migration inhibitory factor (MIF)
PF3D7_1016300	SEED			glycophorin binding protein (GBP)
PF3D7_1335100	SEED			merozoite surface protein 7 (MSP7)
PF3D7_0818200	SEED			14-3-3 protein (14-3-3I)
PF3D7_0827900	SEED			protein disulfide isomerase (PDI8)
PF3D7_0302500	SEED			cytoadherence linked asexual protein 3.1 (CLAG3.1)
PF3D7_0302200	SEED			cytoadherence linked asexual protein 3.2 (CLAG3.2)
PF3D7_0829600	SEED			early transcribed membrane protein 8 (ETRAMP8)
PF3D7_1008900	SEED			adenylate kinase (AK1)
PF3D7_0303000	SEED			N-ethylmaleimide-sensitive fusion protein (NSF)
PF3D7_0702100	SEED			Plasmodium exported protein (PHISTb), unknown function, pseudogene
PF3D7_0935800	SEED			cytoadherence linked asexual protein 9 (CLAG9)
PF3D7_1456800	SEED			V-type H(+)-translocating pyrophosphatase, putative (VP1)
PF3D7_0310400	SEED			parasite-infected erythrocyte surface protein (PIESP1)
PF3D7_1117700	SEED			GTP-binding nuclear protein RAN/TC4 (RAN)
PF3D7_1437800	SEED			trafficking protein particle complex subunit 5, putative (TRAPPC5)
PF3D7_1334500	SEED			MSP7-like protein (MSRP6)
PF3D7_0702400	SEED			small exported membrane protein 1 (SEMP1)
PF3D7_1101500	SEED			exported protein family 4 (EPF4)
PF3D7_1037300	SEED			ADP/ATP transporter on adenylate translocase (ADT)
PF3D7_1479000	SEED			acyl-CoA synthetase (ACS1a)
PF3D7_1343000	SEED			phosphoethanolamine N-methyltransferase (PMT)
PF3D7_1216200	SEED			glycerol-3-phosphate dehydrogenase, putative
PF3D7_1301200	SEED			glycophorin binding protein (GBPH2)
PF3D7_0312400	SEED			glycogen synthase kinase 3 (GSK3)
PF3D7_0631500	SEED			exported protein family 3 (EPF3)
PF3D7_1414400	SEED			serine/threonine protein phosphatase PP1 (PP1)
PF3D7_1445700	SEED			conserved Plasmodium protein, unknown function
PF3D7_0324100	SEED			Pfmc-2TM Maurer-s cleft two transmembrane protein (MC-2TM)
PF3D7_1358800	PREDICTED	0.021	0.00190946	40S ribosomal protein S15 (RPS15)
PF3D7_0936800	PREDICTED	0.035	0.00147352	Plasmodium exported protein (PHISTc), unknown function
PF3D7_0730800.2	PREDICTED	0.03	0.00131408	Plasmodium exported protein, unknown function
PF3D7_1253100	PREDICTED	0.029	0.00118143	Plasmodium exported protein (PHISTa), unknown function
PF3D7_1301400	PREDICTED	0.045	0.00107771	Plasmodium exported protein (hyp12), unknown function (HYP12)
PF3D7_1404800	PREDICTED	0.046	0.00107765	conserved Plasmodium protein, unknown function
PF3D7_0830500	PREDICTED	0.047	0.0010428	tryptophan/threonine-rich antigen (TryThrA)
PF3D7_0402000	PREDICTED	0.041	0.000899505	Plasmodium exported protein (PHISTa), unknown function
PF3D7_1244200	PREDICTED	0.015	0.000891599	RNA polymerase II transcription factor B subunit 2, putative (TFB2)
PF3D7_1476200	PREDICTED	0.049	0.000883078	Plasmodium exported protein (PHISTb), unknown function
PF3D7_0500800	PREDICTED	0.023	0.000849787	mature parasite-infected erythrocyte surface antigen (MESA)
PF3D7_1436000	PREDICTED	0.043	0.000843185	glucose-6-phosphate isomerase (GPI)
PF3D7_1401100	PREDICTED	0.027	0.000811086	DnaJ protein, putative
PF3D7_0512600	PREDICTED	0.04	0.000744286	ras-related protein Rab-1B (RAB1b)
PF3D7_0830600	PREDICTED	0.048	0.000733871	Plasmodium exported protein (PHISTc), unknown function
PF3D7_0113700	PREDICTED	0.027	0.000732711	heat shock protein 40, type II (HSP40)
PF3D7_0801000	PREDICTED	0.039	0.000699852	Plasmodium exported protein (PHISTc), unknown function
PF3D7_0103800	PREDICTED	0.046	0.000678081	actin-related protein (ARP1)
PF3D7_1301700	PREDICTED	0.046	0.000675436	Plasmodium exported protein (hyp8), unknown function (GEXP07)
PF3D7_0201800	PREDICTED	0.039	0.000671924	knob associated heat shock protein 40 (KAHsp40)
PF3D7_0935600	PREDICTED	0.043	0.000669924	gametocytogenesis-implicated protein (GIG)
PF3D7_1204300	PREDICTED	0.049	0.000629428	eukaryotic translation initiation factor 5A (EIF5A)
PF3D7_1200700	PREDICTED	0.039	0.000614103	acyl-CoA synthetase (ACS7)
PF3D7_1149600	PREDICTED	0.044	0.000610579	DnaJ protein, putative
PF3D7_0922500	PREDICTED	0.048	0.000603747	phosphoglycerate kinase (PGK)
PF3D7_1149200	PREDICTED	0.044	0.000600016	ring-infected erythrocyte surface antigen
PF3D7_0424700	PREDICTED	0.042	0.000597792	serine/threonine protein kinase, FIKK family (FIKK4.2)
PF3D7_0301600	PREDICTED	0.049	0.000594349	Plasmodium exported protein (hyp1), unknown function (GEXP21)
PF3D7_0201700	PREDICTED	0.03	0.000590509	DnaJ protein, putative
PF3D7_0532600	PREDICTED	0.024	0.000590305	Plasmodium exported protein, unknown function
PF3D7_1148900	PREDICTED	0.046	0.000571035	Plasmodium exported protein, unknown function
PF3D7_1015600	PREDICTED	0.041	0.000568898	heat shock protein 60 (HSP60)
PF3D7_1347200	PREDICTED	0.032	0.000566441	nucleoside transporter 1 (NT1)
PF3D7_1361100	PREDICTED	0.048	0.000564202	protein transport protein Sec24A (SEC24A)
PF3D7_0501400	PREDICTED	0.025	0.000562154	interspersed repeat antigen (FIRA)
PF3D7_1230700	PREDICTED	0.048	0.000560952	protein transport protein SEC13 (SEC13)
PF3D7_0408700	PREDICTED	0.017	0.000554984	sporozoite micronemal protein essential for cell traversal (PLP1)
PF3D7_0405100	PREDICTED	0.032	0.000547468	protein transport protein Sec24B (SEC24B)
PF3D7_1352900	PREDICTED	0.047	0.000537069	Plasmodium exported protein, unknown function
PF3D7_0322000	PREDICTED	0.045	0.000529629	peptidyl-prolyl cis-trans isomerase (CYP19A)
PF3D7_0418500	PREDICTED	0.043	0.000515575	trafficking protein particle complex subunit 3, putative (BET3)
PF3D7_0201500	PREDICTED	0.05	0.00051384	Plasmodium exported protein (hyp9), unknown function
PF3D7_1017100	PREDICTED	0.033	0.00051368	rhoptry neck protein 12 (RON12)
PF3D7_1478000	PREDICTED	0.035	0.000511972	Plasmodium exported protein (PHISTa), unknown function (GEXP17)
PF3D7_1332300	PREDICTED	0.026	0.000495873	trafficking protein particle complex subunit 2, putative (TRAPPC2)
PF3D7_0310700	PREDICTED	0.026	0.000494129	trafficking protein particle complex subunit 4, putative
PF3D7_0701900	PREDICTED	0.048	0.000481605	Plasmodium exported protein, unknown function
PF3D7_1120100	PREDICTED	0.048	0.000480968	phosphoglycerate mutase, putative (PGM1)
PF3D7_1033900	PREDICTED	0.018	0.000476083	ubiquitin-conjugating enzyme, putative
PF3D7_0936500	PREDICTED	0.043	0.000395698	virulence-associated protein 1 (VAP1)
PF3D7_0214000	PREDICTED	0.05	0.00039386	T-complex protein 1 subunit theta (CCT8)
PF3D7_0424000	PREDICTED	0.048	0.000388749	Plasmodium exported protein (PHISTc), unknown function
PF3D7_0936600	PREDICTED	0.046	0.000380781	Plasmodium exported protein (PHISTc), unknown function (GEXP05)
PF3D7_1029600	PREDICTED	0.047	0.000337833	adenosine deaminase (ADA)
PF3D7_1200600	PREDICTED	0.042	0.000312349	erythrocyte membrane protein 1, PfEMP1 (VAR2CSA)
PF3D7_0935500	PREDICTED	0.045	0.000303575	Plasmodium exported protein, unknown function (GEXP22)
PF3D7_0220200	PREDICTED	0.024	0.000302617	Plasmodium exported protein, unknown function
PF3D7_0711500	PREDICTED	0.041	0.000300785	regulator of chromosome condensation, putative
PF3D7_1148700	PREDICTED	0.049	0.000298242	Plasmodium exported protein (PHISTc), unknown function (GEXP12)
PF3D7_1132800	PREDICTED	0.043	0.000279136	aquaglyceroporin (AQP)
PF3D7_1007700	PREDICTED	0.036	0.000265153	transcription factor with AP2 domain(s) (ApiAP2)
PF3D7_1372200	PREDICTED	0.022	0.000254021	histidine-rich protein III (HRPIII)
PF3D7_1473200	PREDICTED	0.024	0.00025125	DnaJ protein, putative
PF3D7_0913200	PREDICTED	0.039	0.000239972	elongation factor 1-beta (EF-1beta)
PF3D7_1444300	PREDICTED	0.045	0.000231386	1-acyl-sn-glycerol-3-phosphate acyltransferase, putative (LPAAT)
PF3D7_1108600	PREDICTED	0.026	0.00022745	endoplasmic reticulum-resident calcium binding protein (ERC)
PF3D7_1478800	PREDICTED	0.05	0.000205107	Plasmodium exported protein, unknown function
PF3D7_0221700	PREDICTED	0.032	0.000166337	Plasmodium exported protein, unknown function
PF3D7_1404100	PREDICTED	0.048	0.00015083	cytochrome c, putative
PF3D7_0207000	PREDICTED	0.039	0.000145166	merozoite surface protein 4 (MSP4)
PF3D7_1432700	PREDICTED	0.05	0.000144057	protein-L-isoaspartate(D-aspartate) O-methyltransferase, putative
PF3D7_1329400	PREDICTED	0.036	0.000111164	AMP deaminase, putative

## Sheet: ET
GeneID	Seed/Predicted	p-value	RWR Score	Description
PF3D7_0731300	SEED			Plasmodium exported protein (PHISTb), unknown function (PfG174)
PF3D7_1001000	SEED			Plasmodium exported protein (hyp12), unknown function (PfJ13)
PF3D7_0102200	SEED			ring-infected erythrocyte surface antigen (RESA)
PF3D7_0201600	SEED			PHISTb domain-containing RESA-like protein 1 (RLP1)
PF3D7_0501300	SEED			skeleton-binding protein 1 (SBP1)
PF3D7_0423700	SEED			early transcribed membrane protein 4 (ETRAMP4)
PF3D7_1134000	SEED			heat shock protein 70 (HSP70-3)
PF3D7_1149000	SEED			antigen 332, DBL-like protein (Pf332)
PF3D7_1001500	SEED			early transcribed membrane protein 10.1 (ETRAMP10)
PF3D7_0201900	SEED			erythrocyte membrane protein 3 (EMP3)
PF3D7_0202000	SEED			knob-associated histidine-rich protein (KAHRP)
PF3D7_1102700	SEED			early transcribed membrane protein 11.1 (ETRAMP11.1)
PF3D7_1370300	SEED			membrane associated histidine-rich protein (MAHRP1)
PF3D7_1016900	SEED			early transcribed membrane protein 10.3 (ETRAMP10.3)
PF3D7_1002100	SEED			EMP1-trafficking protein (PTP5)
PF3D7_0936300	SEED			ring-exported protein 3 (REX3)
PF3D7_0532400	SEED			lysine-rich membrane-associated PHISTb protein (LyMP)
PF3D7_0202500	SEED			early transcribed membrane protein 2 (ETRAMP2)
PF3D7_1001900	SEED			Plasmodium exported protein (hyp16), unknown function (PfJ23)
PF3D7_0708400	SEED			heat shock protein 90 (HSP90)
PF3D7_1324900	SEED			L-lactate dehydrogenase (LDH)
PF3D7_1401400	SEED			early transcribed membrane protein 14.1 (ETRAMP14)
PF3D7_1033200	SEED			early transcribed membrane protein 10.2 (ETRAMP10.2)
PF3D7_1478600	SEED			EMP1-trafficking protein (PTP3)
PF3D7_0818900	SEED			heat shock protein 70 (HSP70)
PF3D7_1201000	SEED			Plasmodium exported protein (PHISTb), unknown function
PF3D7_1439900	SEED			triosephosphate isomerase (TIM)
PF3D7_1302000	SEED			EMP1-trafficking protein (PTP6)
PF3D7_0501100.2	SEED			heat shock protein 40, type II (HSP40)
PF3D7_1353200	SEED			membrane associated histidine-rich protein (MAHRP2)
PF3D7_0936400	SEED			ring-exported protein 4 (REX4)
PF3D7_1015900	SEED			enolase (ENO)
PF3D7_0822600	SEED			protein transport protein SEC23 (SEC23)
PF3D7_0935900	SEED			ring-exported protein 1 (REX1)
PF3D7_0730900	SEED			EMP1-trafficking protein (PTP4)
PF3D7_0532300	SEED			Plasmodium exported protein (PHISTb), unknown function
PF3D7_0401800	SEED			Plasmodium exported protein (PHISTb), unknown function (PfD80)
PF3D7_0214100	SEED			protein transport protein SEC31 (SEC31)
PF3D7_0406200	SEED			sexual stage-specific protein precursor (Pfs16)
PF3D7_1462800	SEED			glyceraldehyde-3-phosphate dehydrogenase (GAPDH)
PF3D7_0826700	SEED			receptor for activated c kinase (RACK)
PF3D7_0513300	SEED			purine nucleoside phosphorylase (PNP)
PF3D7_0501200	SEED			parasite-infected erythrocyte surface protein (PIESP2)
PF3D7_0626800	SEED			pyruvate kinase (PyrK)
PF3D7_0532100	SEED			early transcribed membrane protein 5 (ETRAMP5)
PF3D7_0917900	SEED			heat shock protein 70 (HSP70-2)
PF3D7_0202200	SEED			EMP1-trafficking protein (PTP1)
PF3D7_1102800	SEED			early transcribed membrane protein 11.2 (ETRAMP11.2)
PF3D7_0731100	SEED			EMP1-trafficking protein (PTP2)
PF3D7_0501000	SEED			Plasmodium exported protein, unknown function
PF3D7_0114100	SEED			Pfmc-2TM Maurer-s cleft two transmembrane protein (MC-2TM)
PF3D7_1240100	SEED			early transcribed membrane protein 12 (ETRAMP12)
PF3D7_0416800	SEED			small GTP-binding protein sar1 (SAR1)
PF3D7_0424600	SEED			Plasmodium exported protein (PHISTb), unknown function
PF3D7_1100800	SEED			Pfmc-2TM Maurer-s cleft two transmembrane protein (MC-2TM)
PF3D7_1471100	SEED			exported protein 2 (EXP2)
PF3D7_1012400	SEED			hypoxanthine-guanine phosphoribosyltransferase (HGPRT)
PF3D7_1222300	SEED			endoplasmin, putative (GRP94)
PF3D7_0929400	SEED			high molecular weight rhoptry protein 2 (RhopH2)
PF3D7_1228600	SEED			merozoite surface protein 9 (MSP9)
PF3D7_0207600	SEED			serine repeat antigen 5 (SERA5)
PF3D7_0905400	SEED			high molecular weight rhoptry protein 3 (RhopH3)
PF3D7_0101300	SEED			Pfmc-2TM Maurer-s cleft two transmembrane protein (MC-2TM)
PF3D7_1121600	SEED			exported protein 1 (EXP1)
PF3D7_0700800	SEED			Pfmc-2TM Maurer-s cleft two transmembrane protein (MC-2TM)
PF3D7_1038400	SEED			gametocyte-specific protein (Pf11-1)
PF3D7_1335100	SEED			merozoite surface protein 7 (MSP7)
PF3D7_0302500	SEED			cytoadherence linked asexual protein 3.1 (CLAG3.1)
PF3D7_1444800	SEED			fructose-bisphosphate aldolase (FBPA)
PF3D7_1229400	SEED			macrophage migration inhibitory factor (MIF)
PF3D7_1016300	SEED			glycophorin binding protein (GBP)
PF3D7_0302200	SEED			cytoadherence linked asexual protein 3.2 (CLAG3.2)
PF3D7_0818200	SEED			14-3-3 protein (14-3-3I)
PF3D7_0827900	SEED			protein disulfide isomerase (PDI8)
PF3D7_0829600	SEED			early transcribed membrane protein 8 (ETRAMP8)
PF3D7_1334500	SEED			MSP7-like protein (MSRP6)
PF3D7_0702100	SEED			Plasmodium exported protein (PHISTb), unknown function, pseudogene
PF3D7_0310400	SEED			parasite-infected erythrocyte surface protein (PIESP1)
PF3D7_1008900	SEED			adenylate kinase (AK1)
PF3D7_0303000	SEED			N-ethylmaleimide-sensitive fusion protein (NSF)
PF3D7_1456800	SEED			V-type H(+)-translocating pyrophosphatase, putative (VP1)
PF3D7_1101500	SEED			exported protein family 4 (EPF4)
PF3D7_1117700	SEED			GTP-binding nuclear protein RAN/TC4 (RAN)
PF3D7_1437800	SEED			trafficking protein particle complex subunit 5, putative (TRAPPC5)
PF3D7_0702400	SEED			small exported membrane protein 1 (SEMP1)
PF3D7_1037300	SEED			ADP/ATP transporter on adenylate translocase (ADT)
PF3D7_1343000	SEED			phosphoethanolamine N-methyltransferase (PMT)
PF3D7_1216200	SEED			glycerol-3-phosphate dehydrogenase, putative
PF3D7_0312400	SEED			glycogen synthase kinase 3 (GSK3)
PF3D7_1301200	SEED			glycophorin binding protein (GBPH2)
PF3D7_1414400	SEED			serine/threonine protein phosphatase PP1 (PP1)
PF3D7_1445700	SEED			conserved Plasmodium protein, unknown function
PF3D7_0324100	SEED			Pfmc-2TM Maurer-s cleft two transmembrane protein (MC-2TM)
PF3D7_1358800	PREDICTED	0.012	0.00192541	40S ribosomal protein S15 (RPS15)
PF3D7_0631900	PREDICTED	0.01	0.00179211	stevor
PF3D7_0936800	PREDICTED	0.023	0.00149915	Plasmodium exported protein (PHISTc), unknown function
PF3D7_1253100	PREDICTED	0.023	0.00134419	Plasmodium exported protein (PHISTa), unknown function
PF3D7_0730800.2	PREDICTED	0.031	0.00127323	Plasmodium exported protein, unknown function
PF3D7_0830500	PREDICTED	0.042	0.00111581	tryptophan/threonine-rich antigen (TryThrA)
PF3D7_1301400	PREDICTED	0.045	0.00108668	Plasmodium exported protein (hyp12), unknown function (HYP12)
PF3D7_0402000	PREDICTED	0.042	0.000902377	Plasmodium exported protein (PHISTa), unknown function
PF3D7_1244200	PREDICTED	0.03	0.000900619	RNA polymerase II transcription factor B subunit 2, putative (TFB2)
PF3D7_1404800	PREDICTED	0.047	0.000892528	conserved Plasmodium protein, unknown function
PF3D7_1476200	PREDICTED	0.043	0.000885465	Plasmodium exported protein (PHISTb), unknown function
PF3D7_0935600	PREDICTED	0.024	0.00088388	gametocytogenesis-implicated protein (GIG)
PF3D7_0500800	PREDICTED	0.018	0.000864476	mature parasite-infected erythrocyte surface antigen (MESA)
PF3D7_1401100	PREDICTED	0.017	0.000847988	DnaJ protein, putative
PF3D7_0830600	PREDICTED	0.04	0.000756355	Plasmodium exported protein (PHISTc), unknown function
PF3D7_1436000	PREDICTED	0.044	0.000742802	glucose-6-phosphate isomerase (GPI)
PF3D7_0108500	PREDICTED	0.032	0.000730905	conserved Plasmodium protein, unknown function
PF3D7_0801000	PREDICTED	0.031	0.000712551	Plasmodium exported protein (PHISTc), unknown function
PF3D7_1301700	PREDICTED	0.046	0.000699759	Plasmodium exported protein (hyp8), unknown function (GEXP07)
PF3D7_0201800	PREDICTED	0.025	0.000681162	knob associated heat shock protein 40 (KAHsp40)
PF3D7_0512600	PREDICTED	0.041	0.000666365	ras-related protein Rab-1B (RAB1b)
PF3D7_0113700	PREDICTED	0.028	0.000645883	heat shock protein 40, type II (HSP40)
PF3D7_1149200	PREDICTED	0.047	0.00064167	ring-infected erythrocyte surface antigen
PF3D7_1204300	PREDICTED	0.046	0.000626908	eukaryotic translation initiation factor 5A (EIF5A)
PF3D7_0424700	PREDICTED	0.043	0.000626074	serine/threonine protein kinase, FIKK family (FIKK4.2)
PF3D7_0501400	PREDICTED	0.025	0.000600311	interspersed repeat antigen (FIRA)
PF3D7_0532600	PREDICTED	0.035	0.000599908	Plasmodium exported protein, unknown function
PF3D7_0201700	PREDICTED	0.023	0.000599123	DnaJ protein, putative
PF3D7_1148900	PREDICTED	0.034	0.000593684	Plasmodium exported protein, unknown function
PF3D7_1352900	PREDICTED	0.05	0.000579665	Plasmodium exported protein, unknown function
PF3D7_1115800	PREDICTED	0.047	0.000572434	conserved Plasmodium protein, unknown function
PF3D7_1361100	PREDICTED	0.045	0.0005654	protein transport protein Sec24A (SEC24A)
PF3D7_1230700	PREDICTED	0.047	0.000561502	protein transport protein SEC13 (SEC13)
PF3D7_1347200	PREDICTED	0.042	0.000554691	nucleoside transporter 1 (NT1)
PF3D7_0405100	PREDICTED	0.034	0.000548631	protein transport protein Sec24B (SEC24B)
PF3D7_1015600	PREDICTED	0.047	0.000546476	heat shock protein 60 (HSP60)
PF3D7_1016800	PREDICTED	0.045	0.00054402	Plasmodium exported protein (PHISTc), unknown function
PF3D7_0201500	PREDICTED	0.034	0.000519905	Plasmodium exported protein (hyp9), unknown function
PF3D7_0701900	PREDICTED	0.027	0.000499129	Plasmodium exported protein, unknown function
PF3D7_0214000	PREDICTED	0.042	0.000488105	T-complex protein 1 subunit theta (CCT8)
PF3D7_1253300	PREDICTED	0.03	0.000427705	Plasmodium exported protein (PHISTa), unknown function, pseudogene
PF3D7_0418500	PREDICTED	0.034	0.000425262	trafficking protein particle complex subunit 3, putative (BET3)
PF3D7_1332300	PREDICTED	0.023	0.00041392	trafficking protein particle complex subunit 2, putative (TRAPPC2)
PF3D7_0310700	PREDICTED	0.023	0.000413002	trafficking protein particle complex subunit 4, putative
PF3D7_0936600	PREDICTED	0.025	0.000410006	Plasmodium exported protein (PHISTc), unknown function (GEXP05)
PF3D7_1041200	PREDICTED	0.046	0.000409209	rifin (RIF)
PF3D7_0424000	PREDICTED	0.046	0.00040185	Plasmodium exported protein (PHISTc), unknown function
PF3D7_1120100	PREDICTED	0.049	0.000393292	phosphoglycerate mutase, putative (PGM1)
PF3D7_1101900	PREDICTED	0.024	0.000387635	erythrocyte membrane protein 1 (PfEMP1), truncated, pseudogene
PF3D7_0220200	PREDICTED	0.022	0.000305343	Plasmodium exported protein, unknown function
PF3D7_0711500	PREDICTED	0.046	0.000302191	regulator of chromosome condensation, putative
PF3D7_0935700	PREDICTED	0.044	0.000290374	Plasmodium exported protein, unknown function
PF3D7_1372200	PREDICTED	0.019	0.000258192	histidine-rich protein III (HRPIII)
PF3D7_1401200	PREDICTED	0.036	0.000257307	Plasmodium exported protein, unknown function
PF3D7_1473200	PREDICTED	0.023	0.000245764	DnaJ protein, putative
PF3D7_0913200	PREDICTED	0.04	0.000241406	elongation factor 1-beta (EF-1beta)
PF3D7_1108600	PREDICTED	0.036	0.000224562	endoplasmic reticulum-resident calcium binding protein (ERC)
PF3D7_0935500	PREDICTED	0.021	0.000223964	Plasmodium exported protein, unknown function (GEXP22)
PF3D7_1401800	PREDICTED	0.036	0.000218121	choline kinase (CK)
PF3D7_1478800	PREDICTED	0.037	0.000216015	Plasmodium exported protein, unknown function
PF3D7_1200600	PREDICTED	0.045	0.00020714	erythrocyte membrane protein 1, PfEMP1 (VAR2CSA)
PF3D7_0936200	PREDICTED	0.024	0.000184351	Plasmodium exported protein (hyp11), unknown function
PF3D7_1351600	PREDICTED	0.046	0.000176869	glycerol kinase (GK)
PF3D7_1444300	PREDICTED	0.049	0.000152936	1-acyl-sn-glycerol-3-phosphate acyltransferase, putative (LPAAT)
PF3D7_1001100.2	PREDICTED	0.047	0.000142159	acyl-CoA binding protein, isoform 1, ACBP1 (ACBP1)
PF3D7_0831800	PREDICTED	0.024	0.000127043	histidine-rich protein II (HRPII)
PF3D7_1329400	PREDICTED	0.05	0.000104394	AMP deaminase, putative

## Sheet: LT
GeneID	Seed/Predicted	permuattaion score	p-value	RWR Score	Description
PF3D7_0731300	SEED				Plasmodium exported protein (PHISTb), unknown function (PfG174)
PF3D7_1001000	SEED				Plasmodium exported protein (hyp12), unknown function (PfJ13)
PF3D7_0501300	SEED				skeleton-binding protein 1 (SBP1)
PF3D7_0102200	SEED				ring-infected erythrocyte surface antigen (RESA)
PF3D7_0201600	SEED				PHISTb domain-containing RESA-like protein 1 (RLP1)
PF3D7_0423700	SEED				early transcribed membrane protein 4 (ETRAMP4)
PF3D7_1134000	SEED				heat shock protein 70 (HSP70-3)
PF3D7_1102700	SEED				early transcribed membrane protein 11.1 (ETRAMP11.1)
PF3D7_0202000	SEED				knob-associated histidine-rich protein (KAHRP)
PF3D7_0201900	SEED				erythrocyte membrane protein 3 (EMP3)
PF3D7_1370300	SEED				membrane associated histidine-rich protein (MAHRP1)
PF3D7_1149000	SEED				antigen 332, DBL-like protein (Pf332)
PF3D7_1002100	SEED				EMP1-trafficking protein (PTP5)
PF3D7_0202500	SEED				early transcribed membrane protein 2 (ETRAMP2)
PF3D7_1401400	SEED				early transcribed membrane protein 14.1 (ETRAMP14)
PF3D7_1001500	SEED				early transcribed membrane protein 10.1 (ETRAMP10)
PF3D7_0532400	SEED				lysine-rich membrane-associated PHISTb protein (LyMP)
PF3D7_0708400	SEED				heat shock protein 90 (HSP90)
PF3D7_1001900	SEED				Plasmodium exported protein (hyp16), unknown function (PfJ23)
PF3D7_1324900	SEED				L-lactate dehydrogenase (LDH)
PF3D7_0936300	SEED				ring-exported protein 3 (REX3)
PF3D7_1478600	SEED				EMP1-trafficking protein (PTP3)
PF3D7_1016900	SEED				early transcribed membrane protein 10.3 (ETRAMP10.3)
PF3D7_0818900	SEED				heat shock protein 70 (HSP70)
PF3D7_1201000	SEED				Plasmodium exported protein (PHISTb), unknown function
PF3D7_1353200	SEED				membrane associated histidine-rich protein (MAHRP2)
PF3D7_1302000	SEED				EMP1-trafficking protein (PTP6)
PF3D7_0501100.2	SEED				heat shock protein 40, type II (HSP40)
PF3D7_1439900	SEED				triosephosphate isomerase (TIM)
PF3D7_1033200	SEED				early transcribed membrane protein 10.2 (ETRAMP10.2)
PF3D7_0936400	SEED				ring-exported protein 4 (REX4)
PF3D7_0822600	SEED				protein transport protein SEC23 (SEC23)
PF3D7_1015900	SEED				enolase (ENO)
PF3D7_0730900	SEED				EMP1-trafficking protein (PTP4)
PF3D7_0935900	SEED				ring-exported protein 1 (REX1)
PF3D7_0532300	SEED				Plasmodium exported protein (PHISTb), unknown function
PF3D7_0214100	SEED				protein transport protein SEC31 (SEC31)
PF3D7_0406200	SEED				sexual stage-specific protein precursor (Pfs16)
PF3D7_0401800	SEED				Plasmodium exported protein (PHISTb), unknown function (PfD80)
PF3D7_1462800	SEED				glyceraldehyde-3-phosphate dehydrogenase (GAPDH)
PF3D7_0501200	SEED				parasite-infected erythrocyte surface protein (PIESP2)
PF3D7_0826700	SEED				receptor for activated c kinase (RACK)
PF3D7_0626800	SEED				pyruvate kinase (PyrK)
PF3D7_0202200	SEED				EMP1-trafficking protein (PTP1)
PF3D7_1102800	SEED				early transcribed membrane protein 11.2 (ETRAMP11.2)
PF3D7_0513300	SEED				purine nucleoside phosphorylase (PNP)
PF3D7_0532100	SEED				early transcribed membrane protein 5 (ETRAMP5)
PF3D7_0731100	SEED				EMP1-trafficking protein (PTP2)
PF3D7_0917900	SEED				heat shock protein 70 (HSP70-2)
PF3D7_1240100	SEED				early transcribed membrane protein 12 (ETRAMP12)
PF3D7_0501000	SEED				Plasmodium exported protein, unknown function
PF3D7_0713100	SEED				Pfmc-2TM Maurer-s cleft two transmembrane protein (MC-2TM)
PF3D7_0114100	SEED				Pfmc-2TM Maurer-s cleft two transmembrane protein (MC-2TM)
PF3D7_0416800	SEED				small GTP-binding protein sar1 (SAR1)
PF3D7_0424600	SEED				Plasmodium exported protein (PHISTb), unknown function
PF3D7_0929400	SEED				high molecular weight rhoptry protein 2 (RhopH2)
PF3D7_1100800	SEED				Pfmc-2TM Maurer-s cleft two transmembrane protein (MC-2TM)
PF3D7_0905400	SEED				high molecular weight rhoptry protein 3 (RhopH3)
PF3D7_1471100	SEED				exported protein 2 (EXP2)
PF3D7_0207600	SEED				serine repeat antigen 5 (SERA5)
PF3D7_1012400	SEED				hypoxanthine-guanine phosphoribosyltransferase (HGPRT)
PF3D7_1222300	SEED				endoplasmin, putative (GRP94)
PF3D7_0501500	SEED				rhoptry-associated protein 3 (RAP3)
PF3D7_0700800	SEED				Pfmc-2TM Maurer-s cleft two transmembrane protein (MC-2TM)
PF3D7_1038400	SEED				gametocyte-specific protein (Pf11-1)
PF3D7_0101300	SEED				Pfmc-2TM Maurer-s cleft two transmembrane protein (MC-2TM)
PF3D7_1121600	SEED				exported protein 1 (EXP1)
PF3D7_1228600	SEED				merozoite surface protein 9 (MSP9)
PF3D7_1016300	SEED				glycophorin binding protein (GBP)
PF3D7_1229400	SEED				macrophage migration inhibitory factor (MIF)
PF3D7_1444800	SEED				fructose-bisphosphate aldolase (FBPA)
PF3D7_1335100	SEED				merozoite surface protein 7 (MSP7)
PF3D7_0818200	SEED				14-3-3 protein (14-3-3I)
PF3D7_0207500	SEED				serine repeat antigen 6 (SERA6)
PF3D7_0302500	SEED				cytoadherence linked asexual protein 3.1 (CLAG3.1)
PF3D7_0829600	SEED				early transcribed membrane protein 8 (ETRAMP8)
PF3D7_0827900	SEED				protein disulfide isomerase (PDI8)
PF3D7_1334500	SEED				MSP7-like protein (MSRP6)
PF3D7_0302200	SEED				cytoadherence linked asexual protein 3.2 (CLAG3.2)
PF3D7_0303000	SEED				N-ethylmaleimide-sensitive fusion protein (NSF)
PF3D7_1008900	SEED				adenylate kinase (AK1)
PF3D7_0310400	SEED				parasite-infected erythrocyte surface protein (PIESP1)
PF3D7_0935800	SEED				cytoadherence linked asexual protein 9 (CLAG9)
PF3D7_1456800	SEED				V-type H(+)-translocating pyrophosphatase, putative (VP1)
PF3D7_0603400	SEED				trophozoite exported protein 1 (TEX1)
PF3D7_1117700	SEED				GTP-binding nuclear protein RAN/TC4 (RAN)
PF3D7_0702400	SEED				small exported membrane protein 1 (SEMP1)
PF3D7_1437800	SEED				trafficking protein particle complex subunit 5, putative (TRAPPC5)
PF3D7_1037300	SEED				ADP/ATP transporter on adenylate translocase (ADT)
PF3D7_1343000	SEED				phosphoethanolamine N-methyltransferase (PMT)
PF3D7_1216200	SEED				glycerol-3-phosphate dehydrogenase, putative
PF3D7_0312400	SEED				glycogen synthase kinase 3 (GSK3)
PF3D7_1301200	SEED				glycophorin binding protein (GBPH2)
PF3D7_1414400	SEED				serine/threonine protein phosphatase PP1 (PP1)
PF3D7_1445700	SEED				conserved Plasmodium protein, unknown function
PF3D7_0324100	SEED				Pfmc-2TM Maurer-s cleft two transmembrane protein (MC-2TM)
PF3D7_1358800	PREDICTED	19	0.019	0.00186197	40S ribosomal protein S15 (RPS15)
PF3D7_1000800	PREDICTED	12	0.012	0.00173611	stevor, pseudogene
PF3D7_0631900	PREDICTED	25	0.025	0.00173611	stevor
PF3D7_0936800	PREDICTED	25	0.025	0.00171099	Plasmodium exported protein (PHISTc), unknown function
PF3D7_1253100	PREDICTED	26	0.026	0.00133132	Plasmodium exported protein (PHISTa), unknown function
PF3D7_1301400	PREDICTED	44	0.044	0.00102217	Plasmodium exported protein (hyp12), unknown function (HYP12)
PF3D7_0730800.2	PREDICTED	33	0.033	0.000969108	Plasmodium exported protein, unknown function
PF3D7_0801000	PREDICTED	28	0.028	0.000939627	Plasmodium exported protein (PHISTc), unknown function
PF3D7_1404800	PREDICTED	34	0.034	0.000938138	conserved Plasmodium protein, unknown function
PF3D7_1401100	PREDICTED	27	0.027	0.000904968	DnaJ protein, putative
PF3D7_1244200	PREDICTED	22	0.022	0.000872606	RNA polymerase II transcription factor B subunit 2, putative (TFB2)
PF3D7_0402000	PREDICTED	44	0.044	0.000855271	Plasmodium exported protein (PHISTa), unknown function
PF3D7_0500800	PREDICTED	28	0.028	0.000837008	mature parasite-infected erythrocyte surface antigen (MESA)
PF3D7_1322000	PREDICTED	36	0.036	0.000836051	adenosine-diphosphatase, putative
PF3D7_0935600	PREDICTED	33	0.033	0.00081998	gametocytogenesis-implicated protein (GIG)
PF3D7_0830600	PREDICTED	46	0.046	0.000802896	Plasmodium exported protein (PHISTc), unknown function
PF3D7_0108500	PREDICTED	46	0.046	0.000779104	conserved Plasmodium protein, unknown function
PF3D7_1301700	PREDICTED	39	0.039	0.00072732	Plasmodium exported protein (hyp8), unknown function (GEXP07)
PF3D7_1436000	PREDICTED	48	0.048	0.000716488	glucose-6-phosphate isomerase (GPI)
PF3D7_0201800	PREDICTED	35	0.035	0.000672732	knob associated heat shock protein 40 (KAHsp40)
PF3D7_1149200	PREDICTED	10	0.01	0.000664987	ring-infected erythrocyte surface antigen
PF3D7_0103800	PREDICTED	46	0.046	0.000654113	actin-related protein (ARP1)
PF3D7_0501400	PREDICTED	41	0.041	0.000643847	interspersed repeat antigen (FIRA)
PF3D7_1148900	PREDICTED	38	0.038	0.000621715	Plasmodium exported protein, unknown function
PF3D7_1352900	PREDICTED	24	0.024	0.000618368	Plasmodium exported protein, unknown function
PF3D7_0424700	PREDICTED	43	0.043	0.0006133	serine/threonine protein kinase, FIKK family (FIKK4.2)
PF3D7_1115800	PREDICTED	49	0.049	0.000601515	conserved Plasmodium protein, unknown function
PF3D7_0201700	PREDICTED	41	0.041	0.000594847	DnaJ protein, putative
PF3D7_0508200	PREDICTED	47	0.047	0.000593081	longevity-assurance (LAG1) protein, putative
PF3D7_0512600	PREDICTED	42	0.042	0.000582802	ras-related protein Rab-1B (RAB1b)
PF3D7_0532600	PREDICTED	26	0.026	0.000576611	Plasmodium exported protein, unknown function
PF3D7_1361100	PREDICTED	29	0.029	0.000551717	protein transport protein Sec24A (SEC24A)
PF3D7_1230700	PREDICTED	45	0.045	0.000548007	protein transport protein SEC13 (SEC13)
PF3D7_0408700	PREDICTED	10	0.01	0.00054333	sporozoite micronemal protein essential for cell traversal (PLP1)
PF3D7_0405100	PREDICTED	27	0.027	0.000535666	protein transport protein Sec24B (SEC24B)
PF3D7_0201500	PREDICTED	46	0.046	0.00051786	Plasmodium exported protein (hyp9), unknown function
PF3D7_1347200	PREDICTED	47	0.047	0.000512353	nucleoside transporter 1 (NT1)
PF3D7_0219700	PREDICTED	40	0.04	0.00050738	Plasmodium exported protein (PHISTc), unknown function (GEXP20)
PF3D7_1015600	PREDICTED	40	0.04	0.000506859	heat shock protein 60 (HSP60)
PF3D7_0320100	PREDICTED	45	0.045	0.000500271	protein transport protein SEC22 (SEC22)
PF3D7_0922500	PREDICTED	49	0.049	0.000494217	phosphoglycerate kinase (PGK)
PF3D7_0322000	PREDICTED	42	0.042	0.000491143	peptidyl-prolyl cis-trans isomerase (CYP19A)
PF3D7_0726100	PREDICTED	34	0.034	0.000479472	Plasmodium exported protein, unknown function
PF3D7_0424500	PREDICTED	35	0.035	0.00045303	serine/threonine protein kinase, FIKK family (FIKK4.1)
PF3D7_1116800	PREDICTED	40	0.04	0.000440518	heat shock protein 101 (HSP101)
PF3D7_1017100	PREDICTED	43	0.043	0.000431576	rhoptry neck protein 12 (RON12)
PF3D7_0936600	PREDICTED	37	0.037	0.000419336	Plasmodium exported protein (PHISTc), unknown function (GEXP05)
PF3D7_1041200	PREDICTED	31	0.031	0.000413831	rifin (RIF)
PF3D7_1033900	PREDICTED	35	0.035	0.000396942	ubiquitin-conjugating enzyme, putative
PF3D7_1120100	PREDICTED	42	0.042	0.000377588	phosphoglycerate mutase, putative (PGM1)
PF3D7_0424000	PREDICTED	37	0.037	0.00037036	Plasmodium exported protein (PHISTc), unknown function
PF3D7_1119800	PREDICTED	45	0.045	0.000356842	alternative splicing factor ASF-1, putative (ASF1)
PF3D7_1332300	PREDICTED	31	0.031	0.000336444	trafficking protein particle complex subunit 2, putative (TRAPPC2)
PF3D7_0310700	PREDICTED	32	0.032	0.000335621	trafficking protein particle complex subunit 4, putative
PF3D7_0618700	PREDICTED	39	0.039	0.000330901	trafficking protein particle complex subunit 6A, putative
PF3D7_0214000	PREDICTED	41	0.041	0.000318688	T-complex protein 1 subunit theta (CCT8)
PF3D7_0935500	PREDICTED	23	0.023	0.00031825	Plasmodium exported protein, unknown function (GEXP22)
PF3D7_1029600	PREDICTED	49	0.049	0.000303558	adenosine deaminase (ADA)
PF3D7_0220200	PREDICTED	24	0.024	0.000295494	Plasmodium exported protein, unknown function
PF3D7_1334300	PREDICTED	12	0.012	0.000269449	MSP7-like protein (MSRP5)
PF3D7_1346700	PREDICTED	42	0.042	0.000263347	6-cysteine protein (P48/45)
PF3D7_1372200	PREDICTED	29	0.029	0.000261092	histidine-rich protein III (HRPIII)
PF3D7_1401200	PREDICTED	35	0.035	0.00024834	Plasmodium exported protein, unknown function
PF3D7_0610800	PREDICTED	41	0.041	0.000246698	transketolase (TK)
PF3D7_0220100	PREDICTED	12	0.012	0.000246153	DnaJ protein, putative
PF3D7_1039000	PREDICTED	48	0.048	0.000235239	serine/threonine protein kinase, FIKK family (FIKK10.2)
PF3D7_0913200	PREDICTED	48	0.048	0.000233174	elongation factor 1-beta (EF-1beta)
PF3D7_1473200	PREDICTED	28	0.028	0.000233085	DnaJ protein, putative
PF3D7_1478800	PREDICTED	44	0.044	0.000232382	Plasmodium exported protein, unknown function
PF3D7_0213100	PREDICTED	47	0.047	0.000216912	protein SIS1 (SIS1)
PF3D7_1108600	PREDICTED	29	0.029	0.000215022	endoplasmic reticulum-resident calcium binding protein (ERC)
PF3D7_1401800	PREDICTED	47	0.047	0.000193925	choline kinase (CK)
PF3D7_0936200	PREDICTED	18	0.018	0.000178416	Plasmodium exported protein (hyp11), unknown function
PF3D7_0731200	PREDICTED	33	0.033	0.000170283	Plasmodium exported protein, unknown function
PF3D7_0624000	PREDICTED	49	0.049	0.00016644	hexokinase (HK)
PF3D7_0411000	PREDICTED	23	0.023	0.000162078	conserved Plasmodium protein, unknown function
PF3D7_1252600	PREDICTED	42	0.042	0.000144935	lysophospholipase, putative
PF3D7_1404100	PREDICTED	44	0.044	0.000144908	cytochrome c, putative
PF3D7_0831800	PREDICTED	18	0.018	0.000137844	histidine-rich protein II (HRPII)
PF3D7_0108600	PREDICTED	49	0.049	0.00012672	conserved Plasmodium protein, unknown function
PF3D7_0202300	PREDICTED	35	0.035	0.000119445	Plasmodium exported protein (hyp11), unknown function
PF3D7_1211400	PREDICTED	49	0.049	0.000103808	heat shock protein DNAJ homologue Pfj4 (PfJ4)
PF3D7_1443000	PREDICTED	35	0.035	0.000102172	serine/threonine protein kinase (SRPK2)

## Sheet: ES
GeneID	Seed/Predicted	p-value	RWR Score	Description
PF3D7_0731300	SEED			Plasmodium exported protein (PHISTb), unknown function (PfG174)
PF3D7_0501300	SEED			skeleton-binding protein 1 (SBP1)
PF3D7_0102200	SEED			ring-infected erythrocyte surface antigen (RESA)
PF3D7_0423700	SEED			early transcribed membrane protein 4 (ETRAMP4)
PF3D7_1134000	SEED			heat shock protein 70 (HSP70-3)
PF3D7_1370300	SEED			membrane associated histidine-rich protein (MAHRP1)
PF3D7_1102700	SEED			early transcribed membrane protein 11.1 (ETRAMP11.1)
PF3D7_0201900	SEED			erythrocyte membrane protein 3 (EMP3)
PF3D7_0936300	SEED			ring-exported protein 3 (REX3)
PF3D7_1149000	SEED			antigen 332, DBL-like protein (Pf332)
PF3D7_0202000	SEED			knob-associated histidine-rich protein (KAHRP)
PF3D7_1002100	SEED			EMP1-trafficking protein (PTP5)
PF3D7_0202500	SEED			early transcribed membrane protein 2 (ETRAMP2)
PF3D7_1401400	SEED			early transcribed membrane protein 14.1 (ETRAMP14)
PF3D7_1001500	SEED			early transcribed membrane protein 10.1 (ETRAMP10)
PF3D7_0708400	SEED			heat shock protein 90 (HSP90)
PF3D7_1324900	SEED			L-lactate dehydrogenase (LDH)
PF3D7_0532400	SEED			lysine-rich membrane-associated PHISTb protein (LyMP)
PF3D7_1353200	SEED			membrane associated histidine-rich protein (MAHRP2)
PF3D7_1001900	SEED			Plasmodium exported protein (hyp16), unknown function (PfJ23)
PF3D7_1016900	SEED			early transcribed membrane protein 10.3 (ETRAMP10.3)
PF3D7_0936400	SEED			ring-exported protein 4 (REX4)
PF3D7_0501100.2	SEED			heat shock protein 40, type II (HSP40)
PF3D7_0818900	SEED			heat shock protein 70 (HSP70)
PF3D7_1302000	SEED			EMP1-trafficking protein (PTP6)
PF3D7_1033200	SEED			early transcribed membrane protein 10.2 (ETRAMP10.2)
PF3D7_1439900	SEED			triosephosphate isomerase (TIM)
PF3D7_0935900	SEED			ring-exported protein 1 (REX1)
PF3D7_1015900	SEED			enolase (ENO)
PF3D7_0822600	SEED			protein transport protein SEC23 (SEC23)
PF3D7_0214100	SEED			protein transport protein SEC31 (SEC31)
PF3D7_0401800	SEED			Plasmodium exported protein (PHISTb), unknown function (PfD80)
PF3D7_0406200	SEED			sexual stage-specific protein precursor (Pfs16)
PF3D7_1462800	SEED			glyceraldehyde-3-phosphate dehydrogenase (GAPDH)
PF3D7_0202200	SEED			EMP1-trafficking protein (PTP1)
PF3D7_0730900	SEED			EMP1-trafficking protein (PTP4)
PF3D7_0731100	SEED			EMP1-trafficking protein (PTP2)
PF3D7_0532100	SEED			early transcribed membrane protein 5 (ETRAMP5)
PF3D7_1201000	SEED			Plasmodium exported protein (PHISTb), unknown function
PF3D7_0513300	SEED			purine nucleoside phosphorylase (PNP)
PF3D7_0626800	SEED			pyruvate kinase (PyrK)
PF3D7_0826700	SEED			receptor for activated c kinase (RACK)
PF3D7_0532300	SEED			Plasmodium exported protein (PHISTb), unknown function
PF3D7_1102800	SEED			early transcribed membrane protein 11.2 (ETRAMP11.2)
PF3D7_0501000	SEED			Plasmodium exported protein, unknown function
PF3D7_0201600	SEED			PHISTb domain-containing RESA-like protein 1 (RLP1)
PF3D7_0917900	SEED			heat shock protein 70 (HSP70-2)
PF3D7_1240100	SEED			early transcribed membrane protein 12 (ETRAMP12)
PF3D7_0114100	SEED			Pfmc-2TM Maurer-s cleft two transmembrane protein (MC-2TM)
PF3D7_0424600	SEED			Plasmodium exported protein (PHISTb), unknown function
PF3D7_0416800	SEED			small GTP-binding protein sar1 (SAR1)
PF3D7_1471100	SEED			exported protein 2 (EXP2)
PF3D7_1012400	SEED			hypoxanthine-guanine phosphoribosyltransferase (HGPRT)
PF3D7_0929400	SEED			high molecular weight rhoptry protein 2 (RhopH2)
PF3D7_1222300	SEED			endoplasmin, putative (GRP94)
PF3D7_0207600	SEED			serine repeat antigen 5 (SERA5)
PF3D7_0905400	SEED			high molecular weight rhoptry protein 3 (RhopH3)
PF3D7_0501200	SEED			parasite-infected erythrocyte surface protein (PIESP2)
PF3D7_0501500	SEED			rhoptry-associated protein 3 (RAP3)
PF3D7_1038400	SEED			gametocyte-specific protein (Pf11-1)
PF3D7_1121600	SEED			exported protein 1 (EXP1)
PF3D7_1016300	SEED			glycophorin binding protein (GBP)
PF3D7_1229400	SEED			macrophage migration inhibitory factor (MIF)
PF3D7_1444800	SEED			fructose-bisphosphate aldolase (FBPA)
PF3D7_1228600	SEED			merozoite surface protein 9 (MSP9)
PF3D7_0818200	SEED			14-3-3 protein (14-3-3I)
PF3D7_0207500	SEED			serine repeat antigen 6 (SERA6)
PF3D7_0827900	SEED			protein disulfide isomerase (PDI8)
PF3D7_0829600	SEED			early transcribed membrane protein 8 (ETRAMP8)
PF3D7_1335100	SEED			merozoite surface protein 7 (MSP7)
PF3D7_0702100	SEED			Plasmodium exported protein (PHISTb), unknown function, pseudogene
PF3D7_1334500	SEED			MSP7-like protein (MSRP6)
PF3D7_1008900	SEED			adenylate kinase (AK1)
PF3D7_0303000	SEED			N-ethylmaleimide-sensitive fusion protein (NSF)
PF3D7_0310400	SEED			parasite-infected erythrocyte surface protein (PIESP1)
PF3D7_0302500	SEED			cytoadherence linked asexual protein 3.1 (CLAG3.1)
PF3D7_0302200	SEED			cytoadherence linked asexual protein 3.2 (CLAG3.2)
PF3D7_1456800	SEED			V-type H(+)-translocating pyrophosphatase, putative (VP1)
PF3D7_0935800	SEED			cytoadherence linked asexual protein 9 (CLAG9)
PF3D7_1117700	SEED			GTP-binding nuclear protein RAN/TC4 (RAN)
PF3D7_0702400	SEED			small exported membrane protein 1 (SEMP1)
PF3D7_0717600	SEED			conserved Plasmodium protein, unknown function
PF3D7_1437800	SEED			trafficking protein particle complex subunit 5, putative (TRAPPC5)
PF3D7_1037300	SEED			ADP/ATP transporter on adenylate translocase (ADT)
PF3D7_1343000	SEED			phosphoethanolamine N-methyltransferase (PMT)
PF3D7_1216200	SEED			glycerol-3-phosphate dehydrogenase, putative
PF3D7_1301200	SEED			glycophorin binding protein (GBPH2)
PF3D7_0700800	SEED			Pfmc-2TM Maurer-s cleft two transmembrane protein (MC-2TM)
PF3D7_0312400	SEED			glycogen synthase kinase 3 (GSK3)
PF3D7_1414400	SEED			serine/threonine protein phosphatase PP1 (PP1)
PF3D7_1445700	SEED			conserved Plasmodium protein, unknown function
PF3D7_0936800	PREDICTED	0.029	0.00194998	Plasmodium exported protein (PHISTc), unknown function
PF3D7_0631900	PREDICTED	0.012	0.0018315	stevor
PF3D7_1301400	PREDICTED	0.033	0.00115079	Plasmodium exported protein (hyp12), unknown function (HYP12)
PF3D7_0730800.2	PREDICTED	0.02	0.00112408	Plasmodium exported protein, unknown function
PF3D7_1404800	PREDICTED	0.036	0.00108576	conserved Plasmodium protein, unknown function
PF3D7_1401100	PREDICTED	0.014	0.00106176	DnaJ protein, putative
PF3D7_0112900	PREDICTED	0.01	0.000978602	Plasmodium exported protein, unknown function
PF3D7_0500800	PREDICTED	0.027	0.000963321	mature parasite-infected erythrocyte surface antigen (MESA)
PF3D7_1244200	PREDICTED	0.012	0.000920619	RNA polymerase II transcription factor B subunit 2, putative (TFB2)
PF3D7_0935600	PREDICTED	0.029	0.000913206	gametocytogenesis-implicated protein (GIG)
PF3D7_1322000	PREDICTED	0.018	0.000877012	adenosine-diphosphatase, putative
PF3D7_1301700	PREDICTED	0.026	0.00087408	Plasmodium exported protein (hyp8), unknown function (GEXP07)
PF3D7_0108500	PREDICTED	0.039	0.000852865	conserved Plasmodium protein, unknown function
PF3D7_0201800	PREDICTED	0.02	0.000822498	knob associated heat shock protein 40 (KAHsp40)
PF3D7_0402000	PREDICTED	0.04	0.000783769	Plasmodium exported protein (PHISTa), unknown function
PF3D7_1436000	PREDICTED	0.048	0.000771522	glucose-6-phosphate isomerase (GPI)
PF3D7_1148900	PREDICTED	0.015	0.0007436	Plasmodium exported protein, unknown function
PF3D7_0501400	PREDICTED	0.028	0.000742501	interspersed repeat antigen (FIRA)
PF3D7_1149200	PREDICTED	0.038	0.000731626	ring-infected erythrocyte surface antigen
PF3D7_0201500	PREDICTED	0.023	0.000656596	Plasmodium exported protein (hyp9), unknown function
PF3D7_1115800	PREDICTED	0.049	0.00064264	conserved Plasmodium protein, unknown function
PF3D7_0508200	PREDICTED	0.04	0.000625286	longevity-assurance (LAG1) protein, putative
PF3D7_0424700	PREDICTED	0.031	0.000614966	serine/threonine protein kinase, FIKK family (FIKK4.2)
PF3D7_0512600	PREDICTED	0.047	0.000613047	ras-related protein Rab-1B (RAB1b)
PF3D7_1361100	PREDICTED	0.039	0.00058171	protein transport protein Sec24A (SEC24A)
PF3D7_1230700	PREDICTED	0.041	0.000578143	protein transport protein SEC13 (SEC13)
PF3D7_1347200	PREDICTED	0.043	0.000573712	nucleoside transporter 1 (NT1)
PF3D7_0408700	PREDICTED	0.009	0.000573096	sporozoite micronemal protein essential for cell traversal (PLP1)
PF3D7_1253300	PREDICTED	0.02	0.000565326	Plasmodium exported protein (PHISTa), unknown function, pseudogene
PF3D7_0405100	PREDICTED	0.028	0.000565086	protein transport protein Sec24B (SEC24B)
PF3D7_0219700	PREDICTED	0.043	0.000562858	Plasmodium exported protein (PHISTc), unknown function (GEXP20)
PF3D7_1200700	PREDICTED	0.046	0.000562676	acyl-CoA synthetase (ACS7)
PF3D7_0702000	PREDICTED	0.039	0.000557482	Plasmodium exported protein (hyp12), unknown function
PF3D7_1015600	PREDICTED	0.036	0.000550918	heat shock protein 60 (HSP60)
PF3D7_0402100	PREDICTED	0.046	0.000549206	Plasmodium exported protein (PHISTb), unknown function
PF3D7_0424500	PREDICTED	0.044	0.000540847	serine/threonine protein kinase, FIKK family (FIKK4.1)
PF3D7_0322000	PREDICTED	0.048	0.000527548	peptidyl-prolyl cis-trans isomerase (CYP19A)
PF3D7_0320100	PREDICTED	0.047	0.000526027	protein transport protein SEC22 (SEC22)
PF3D7_0922500	PREDICTED	0.042	0.000524378	phosphoglycerate kinase (PGK)
PF3D7_1252900	PREDICTED	0.045	0.000490291	Plasmodium exported protein, unknown function
PF3D7_0936600	PREDICTED	0.029	0.000481737	Plasmodium exported protein (PHISTc), unknown function (GEXP05)
PF3D7_1116800	PREDICTED	0.045	0.000472961	heat shock protein 101 (HSP101)
PF3D7_1201200	PREDICTED	0.044	0.000457054	Plasmodium exported protein (PHISTa-like), unknown function
PF3D7_1017100	PREDICTED	0.035	0.000421782	rhoptry neck protein 12 (RON12)
PF3D7_1033900	PREDICTED	0.049	0.000411585	ubiquitin-conjugating enzyme, putative
PF3D7_0520900	PREDICTED	0.044	0.000405395	S-adenosyl-L-homocysteine hydrolase (SAHH)
PF3D7_1120100	PREDICTED	0.042	0.000401213	phosphoglycerate mutase, putative (PGM1)
PF3D7_0935700	PREDICTED	0.037	0.000397069	Plasmodium exported protein, unknown function
PF3D7_1253100	PREDICTED	0.018	0.00038232	Plasmodium exported protein (PHISTa), unknown function
PF3D7_0309600	PREDICTED	0.046	0.000373201	60S acidic ribosomal protein P2 (PfP2)
PF3D7_0418500	PREDICTED	0.037	0.000366909	trafficking protein particle complex subunit 3, putative (BET3)
PF3D7_1332300	PREDICTED	0.025	0.000356476	trafficking protein particle complex subunit 2, putative (TRAPPC2)
PF3D7_0310700	PREDICTED	0.027	0.000355638	trafficking protein particle complex subunit 4, putative
PF3D7_0618700	PREDICTED	0.026	0.000350256	trafficking protein particle complex subunit 6A, putative
PF3D7_1029600	PREDICTED	0.049	0.000344812	adenosine deaminase (ADA)
PF3D7_0935500	PREDICTED	0.035	0.00034339	Plasmodium exported protein, unknown function (GEXP22)
PF3D7_0214000	PREDICTED	0.041	0.000336469	T-complex protein 1 subunit theta (CCT8)
PF3D7_1372200	PREDICTED	0.015	0.00032412	histidine-rich protein III (HRPIII)
PF3D7_0220200	PREDICTED	0.018	0.00031224	Plasmodium exported protein, unknown function
PF3D7_1401200	PREDICTED	0.034	0.000308473	Plasmodium exported protein, unknown function
PF3D7_0711500	PREDICTED	0.046	0.000306574	regulator of chromosome condensation, putative
PF3D7_1465400	PREDICTED	0.043	0.000288377	conserved Plasmodium protein, unknown function
PF3D7_1041200	PREDICTED	0.035	0.000275552	rifin (RIF)
PF3D7_0532600	PREDICTED	0.027	0.000264812	Plasmodium exported protein, unknown function
PF3D7_1473200	PREDICTED	0.026	0.000250951	DnaJ protein, putative
PF3D7_1148700	PREDICTED	0.028	0.000248201	Plasmodium exported protein (PHISTc), unknown function (GEXP12)
PF3D7_0913200	PREDICTED	0.032	0.000244957	elongation factor 1-beta (EF-1beta)
PF3D7_1108600	PREDICTED	0.03	0.000228118	endoplasmic reticulum-resident calcium binding protein (ERC)
PF3D7_1401800	PREDICTED	0.033	0.000221237	choline kinase (CK)
PF3D7_1124600	PREDICTED	0.05	0.000219804	ethanolamine kinase (EK)
PF3D7_0424000	PREDICTED	0.037	0.000192572	Plasmodium exported protein (PHISTc), unknown function
PF3D7_0936200	PREDICTED	0.028	0.000190919	Plasmodium exported protein (hyp11), unknown function
PF3D7_1351600	PREDICTED	0.049	0.000179377	glycerol kinase (GK)
PF3D7_0831800	PREDICTED	0.01	0.000156857	histidine-rich protein II (HRPII)
PF3D7_1404100	PREDICTED	0.04	0.000154315	cytochrome c, putative
PF3D7_1217300	PREDICTED	0.046	0.000140834	GTP-binding protein, putative
PF3D7_0313500	PREDICTED	0.043	0.000138809	GTP-binding protein EngA, putative
PF3D7_0507300	PREDICTED	0.04	0.000126152	conserved Plasmodium protein, unknown function
PF3D7_1311700	PREDICTED	0.049	0.000121239	cytochrome c2 precursor, putative
PF3D7_1443000	PREDICTED	0.035	0.000108012	serine/threonine protein kinase (SRPK2)
PF3D7_1472100	PREDICTED	0.049	0.000105683	protein transport protein YIP1, putative (YIP1)
PF3D7_1329400	PREDICTED	0.033	0.000105512	AMP deaminase, putative
PF3D7_0219500	PREDICTED	0.042	0.000104275	pseudouridine synthase, putative
PF3D7_0914000	PREDICTED	0.026	0.000102674	pseudouridylate synthase, putative

## Sheet: LS
GeneID	Seed/Predicted	p-value	RWR Score	Description
PF3D7_0731300	SEED			Plasmodium exported protein (PHISTb), unknown function (PfG174)
PF3D7_0102200	SEED			ring-infected erythrocyte surface antigen (RESA)
PF3D7_0423700	SEED			early transcribed membrane protein 4 (ETRAMP4)
PF3D7_0501300	SEED			skeleton-binding protein 1 (SBP1)
PF3D7_1134000	SEED			heat shock protein 70 (HSP70-3)
PF3D7_1001500	SEED			early transcribed membrane protein 10.1 (ETRAMP10)
PF3D7_1370300	SEED			membrane associated histidine-rich protein (MAHRP1)
PF3D7_0936300	SEED			ring-exported protein 3 (REX3)
PF3D7_1102700	SEED			early transcribed membrane protein 11.1 (ETRAMP11.1)
PF3D7_0202000	SEED			knob-associated histidine-rich protein (KAHRP)
PF3D7_0201900	SEED			erythrocyte membrane protein 3 (EMP3)
PF3D7_1002100	SEED			EMP1-trafficking protein (PTP5)
PF3D7_1324900	SEED			L-lactate dehydrogenase (LDH)
PF3D7_0708400	SEED			heat shock protein 90 (HSP90)
PF3D7_0202500	SEED			early transcribed membrane protein 2 (ETRAMP2)
PF3D7_1401400	SEED			early transcribed membrane protein 14.1 (ETRAMP14)
PF3D7_0532400	SEED			lysine-rich membrane-associated PHISTb protein (LyMP)
PF3D7_0818900	SEED			heat shock protein 70 (HSP70)
PF3D7_1439900	SEED			triosephosphate isomerase (TIM)
PF3D7_1001900	SEED			Plasmodium exported protein (hyp16), unknown function (PfJ23)
PF3D7_1033200	SEED			early transcribed membrane protein 10.2 (ETRAMP10.2)
PF3D7_1016900	SEED			early transcribed membrane protein 10.3 (ETRAMP10.3)
PF3D7_0936400	SEED			ring-exported protein 4 (REX4)
PF3D7_1353200	SEED			membrane associated histidine-rich protein (MAHRP2)
PF3D7_0501100.2	SEED			heat shock protein 40, type II (HSP40)
PF3D7_1302000	SEED			EMP1-trafficking protein (PTP6)
PF3D7_1015900	SEED			enolase (ENO)
PF3D7_0935900	SEED			ring-exported protein 1 (REX1)
PF3D7_0822600	SEED			protein transport protein SEC23 (SEC23)
PF3D7_0214100	SEED			protein transport protein SEC31 (SEC31)
PF3D7_0401800	SEED			Plasmodium exported protein (PHISTb), unknown function (PfD80)
PF3D7_1462800	SEED			glyceraldehyde-3-phosphate dehydrogenase (GAPDH)
PF3D7_0406200	SEED			sexual stage-specific protein precursor (Pfs16)
PF3D7_0730900	SEED			EMP1-trafficking protein (PTP4)
PF3D7_0532100	SEED			early transcribed membrane protein 5 (ETRAMP5)
PF3D7_0626800	SEED			pyruvate kinase (PyrK)
PF3D7_0826700	SEED			receptor for activated c kinase (RACK)
PF3D7_0513300	SEED			purine nucleoside phosphorylase (PNP)
PF3D7_0501000	SEED			Plasmodium exported protein, unknown function
PF3D7_0532300	SEED			Plasmodium exported protein (PHISTb), unknown function
PF3D7_0731100	SEED			EMP1-trafficking protein (PTP2)
PF3D7_0202200	SEED			EMP1-trafficking protein (PTP1)
PF3D7_0917900	SEED			heat shock protein 70 (HSP70-2)
PF3D7_0201600	SEED			PHISTb domain-containing RESA-like protein 1 (RLP1)
PF3D7_1102800	SEED			early transcribed membrane protein 11.2 (ETRAMP11.2)
PF3D7_0416800	SEED			small GTP-binding protein sar1 (SAR1)
PF3D7_1201000	SEED			Plasmodium exported protein (PHISTb), unknown function
PF3D7_1240100	SEED			early transcribed membrane protein 12 (ETRAMP12)
PF3D7_1471100	SEED			exported protein 2 (EXP2)
PF3D7_1012400	SEED			hypoxanthine-guanine phosphoribosyltransferase (HGPRT)
PF3D7_0424600	SEED			Plasmodium exported protein (PHISTb), unknown function
PF3D7_0929400	SEED			high molecular weight rhoptry protein 2 (RhopH2)
PF3D7_1222300	SEED			endoplasmin, putative (GRP94)
PF3D7_0905400	SEED			high molecular weight rhoptry protein 3 (RhopH3)
PF3D7_0207600	SEED			serine repeat antigen 5 (SERA5)
PF3D7_0501200	SEED			parasite-infected erythrocyte surface protein (PIESP2)
PF3D7_0501500	SEED			rhoptry-associated protein 3 (RAP3)
PF3D7_1121600	SEED			exported protein 1 (EXP1)
PF3D7_1229400	SEED			macrophage migration inhibitory factor (MIF)
PF3D7_1444800	SEED			fructose-bisphosphate aldolase (FBPA)
PF3D7_1016300	SEED			glycophorin binding protein (GBP)
PF3D7_0818200	SEED			14-3-3 protein (14-3-3I)
PF3D7_1228600	SEED			merozoite surface protein 9 (MSP9)
PF3D7_0827900	SEED			protein disulfide isomerase (PDI8)
PF3D7_1038400	SEED			gametocyte-specific protein (Pf11-1)
PF3D7_0207500	SEED			serine repeat antigen 6 (SERA6)
PF3D7_1335100	SEED			merozoite surface protein 7 (MSP7)
PF3D7_1008900	SEED			adenylate kinase (AK1)
PF3D7_0303000	SEED			N-ethylmaleimide-sensitive fusion protein (NSF)
PF3D7_0702100	SEED			Plasmodium exported protein (PHISTb), unknown function, pseudogene
PF3D7_0302500	SEED			cytoadherence linked asexual protein 3.1 (CLAG3.1)
PF3D7_0302200	SEED			cytoadherence linked asexual protein 3.2 (CLAG3.2)
PF3D7_1456800	SEED			V-type H(+)-translocating pyrophosphatase, putative (VP1)
PF3D7_1117700	SEED			GTP-binding nuclear protein RAN/TC4 (RAN)
PF3D7_0310400	SEED			parasite-infected erythrocyte surface protein (PIESP1)
PF3D7_0935800	SEED			cytoadherence linked asexual protein 9 (CLAG9)
PF3D7_0829600	SEED			early transcribed membrane protein 8 (ETRAMP8)
PF3D7_1334500	SEED			MSP7-like protein (MSRP6)
PF3D7_0702400	SEED			small exported membrane protein 1 (SEMP1)
PF3D7_1101500	SEED			exported protein family 4 (EPF4)
PF3D7_1437800	SEED			trafficking protein particle complex subunit 5, putative (TRAPPC5)
PF3D7_1037300	SEED			ADP/ATP transporter on adenylate translocase (ADT)
PF3D7_1343000	SEED			phosphoethanolamine N-methyltransferase (PMT)
PF3D7_1479000	SEED			acyl-CoA synthetase (ACS1a)
PF3D7_1216200	SEED			glycerol-3-phosphate dehydrogenase, putative
PF3D7_0312400	SEED			glycogen synthase kinase 3 (GSK3)
PF3D7_0631500	SEED			exported protein family 3 (EPF3)
PF3D7_1414400	SEED			serine/threonine protein phosphatase PP1 (PP1)
PF3D7_1301200	SEED			glycophorin binding protein (GBPH2)
PF3D7_1445700	SEED			conserved Plasmodium protein, unknown function
PF3D7_0936800	PREDICTED	0.008	0.00197274	Plasmodium exported protein (PHISTc), unknown function
PF3D7_1322000	PREDICTED	0.027	0.00181575	adenosine-diphosphatase, putative
PF3D7_0730800.2	PREDICTED	0.02	0.00146155	Plasmodium exported protein, unknown function
PF3D7_1404800	PREDICTED	0.028	0.00139201	conserved Plasmodium protein, unknown function
PF3D7_0830500	PREDICTED	0.042	0.00115828	tryptophan/threonine-rich antigen (TryThrA)
PF3D7_1301400	PREDICTED	0.049	0.00111153	Plasmodium exported protein (hyp12), unknown function (HYP12)
PF3D7_0112900	PREDICTED	0.016	0.000989497	Plasmodium exported protein, unknown function
PF3D7_1401100	PREDICTED	0.015	0.000903472	DnaJ protein, putative
PF3D7_0500800	PREDICTED	0.038	0.000865226	mature parasite-infected erythrocyte surface antigen (MESA)
PF3D7_1149600	PREDICTED	0.028	0.000849644	DnaJ protein, putative
PF3D7_0935600	PREDICTED	0.037	0.000844164	gametocytogenesis-implicated protein (GIG)
PF3D7_0113700	PREDICTED	0.033	0.000799823	heat shock protein 40, type II (HSP40)
PF3D7_1301700	PREDICTED	0.04	0.000790845	Plasmodium exported protein (hyp8), unknown function (GEXP07)
PF3D7_0201800	PREDICTED	0.03	0.000788803	knob associated heat shock protein 40 (KAHsp40)
PF3D7_0108500	PREDICTED	0.03	0.000726291	conserved Plasmodium protein, unknown function
PF3D7_0201700	PREDICTED	0.03	0.000681464	DnaJ protein, putative
PF3D7_1148900	PREDICTED	0.037	0.000643633	Plasmodium exported protein, unknown function
PF3D7_0501400	PREDICTED	0.034	0.000639836	interspersed repeat antigen (FIRA)
PF3D7_0424700	PREDICTED	0.034	0.000632569	serine/threonine protein kinase, FIKK family (FIKK4.2)
PF3D7_0508200	PREDICTED	0.04	0.000628608	longevity-assurance (LAG1) protein, putative
PF3D7_0201500	PREDICTED	0.038	0.000620281	Plasmodium exported protein (hyp9), unknown function
PF3D7_1347200	PREDICTED	0.032	0.000595888	nucleoside transporter 1 (NT1)
PF3D7_1361100	PREDICTED	0.037	0.000589159	protein transport protein Sec24A (SEC24A)
PF3D7_0408700	PREDICTED	0.017	0.000582373	sporozoite micronemal protein essential for cell traversal (PLP1)
PF3D7_1352900	PREDICTED	0.043	0.000578561	Plasmodium exported protein, unknown function
PF3D7_0405100	PREDICTED	0.03	0.000571973	protein transport protein Sec24B (SEC24B)
PF3D7_0322000	PREDICTED	0.049	0.000553559	peptidyl-prolyl cis-trans isomerase (CYP19A)
PF3D7_0701900	PREDICTED	0.039	0.000530316	Plasmodium exported protein, unknown function
PF3D7_0726100	PREDICTED	0.041	0.000494139	Plasmodium exported protein, unknown function
PF3D7_1253300	PREDICTED	0.02	0.000477623	Plasmodium exported protein (PHISTa), unknown function, pseudogene
PF3D7_0936600	PREDICTED	0.025	0.000472166	Plasmodium exported protein (PHISTc), unknown function (GEXP05)
PF3D7_0418500	PREDICTED	0.05	0.000440716	trafficking protein particle complex subunit 3, putative (BET3)
PF3D7_0418500	PREDICTED	0.05	0.000440716	trafficking protein particle complex subunit 3, putative (BET3)
PF3D7_1017100	PREDICTED	0.047	0.000427908	rhoptry neck protein 12 (RON12)
PF3D7_1332300	PREDICTED	0.029	0.00042493	trafficking protein particle complex subunit 2, putative (TRAPPC2)
PF3D7_0310700	PREDICTED	0.03	0.000423989	trafficking protein particle complex subunit 4, putative
PF3D7_1033900	PREDICTED	0.037	0.000417761	ubiquitin-conjugating enzyme, putative
PF3D7_0309600	PREDICTED	0.043	0.000382819	60S acidic ribosomal protein P2 (PfP2)
PF3D7_1401200	PREDICTED	0.023	0.000369448	Plasmodium exported protein, unknown function
PF3D7_0935500	PREDICTED	0.038	0.000365045	Plasmodium exported protein, unknown function (GEXP22)
PF3D7_0112200	PREDICTED	0.046	0.000362567	multidrug resistance-associated protein 1 (MRP1)
PF3D7_1029600	PREDICTED	0.048	0.000361953	adenosine deaminase (ADA)
PF3D7_0711500	PREDICTED	0.038	0.000356451	regulator of chromosome condensation, putative
PF3D7_1253100	PREDICTED	0.041	0.000338442	Plasmodium exported protein (PHISTa), unknown function
PF3D7_0220200	PREDICTED	0.019	0.000316041	Plasmodium exported protein, unknown function
PF3D7_1372200	PREDICTED	0.022	0.000310475	histidine-rich protein III (HRPIII)
PF3D7_1346700	PREDICTED	0.031	0.000262118	6-cysteine protein (P48/45)
PF3D7_1148700	PREDICTED	0.039	0.000250691	Plasmodium exported protein (PHISTc), unknown function (GEXP12)
PF3D7_0913200	PREDICTED	0.045	0.00024843	elongation factor 1-beta (EF-1beta)
PF3D7_1108600	PREDICTED	0.048	0.000232171	endoplasmic reticulum-resident calcium binding protein (ERC)
PF3D7_1401800	PREDICTED	0.037	0.000224971	choline kinase (CK)
PF3D7_1478800	PREDICTED	0.035	0.000223609	Plasmodium exported protein, unknown function
PF3D7_1124600	PREDICTED	0.049	0.00022318	ethanolamine kinase (EK)
PF3D7_0424000	PREDICTED	0.022	0.000205558	Plasmodium exported protein (PHISTc), unknown function
PF3D7_1351600	PREDICTED	0.045	0.000196234	glycerol kinase (GK)
PF3D7_0831800	PREDICTED	0.016	0.000158064	histidine-rich protein II (HRPII)
PF3D7_1404100	PREDICTED	0.046	0.000156819	cytochrome c, putative
PF3D7_1217300	PREDICTED	0.037	0.00015584	GTP-binding protein, putative
PF3D7_1443000	PREDICTED	0.03	0.000115403	serine/threonine protein kinase (SRPK2)
PF3D7_1329400	PREDICTED	0.036	0.000113893	AMP deaminase, putative
PF3D7_0219500	PREDICTED	0.032	0.000109971	pseudouridine synthase, putative
PF3D7_0914000	PREDICTED	0.021	0.000109772	pseudouridylate synthase, putative
PF3D7_0417300	PREDICTED	0.02	0.000106475	LETM1-like protein, putative
PF3D7_0206700	PREDICTED	0.064	0.00010184	adenylosuccinate lyase (ASL)

## Sheet: M
GeneID	Seed/Predicted	p-value	RWR Score	Description
PF3D7_0423700	SEED			early transcribed membrane protein 4 (ETRAMP4)
PF3D7_0102200	SEED			ring-infected erythrocyte surface antigen (RESA)
PF3D7_0501300	SEED			skeleton-binding protein 1 (SBP1)
PF3D7_0731300	SEED			Plasmodium exported protein (PHISTb), unknown function (PfG174)
PF3D7_1001500	SEED			early transcribed membrane protein 10.1 (ETRAMP10)
PF3D7_0202000	SEED			knob-associated histidine-rich protein (KAHRP)
PF3D7_1134000	SEED			heat shock protein 70 (HSP70-3)
PF3D7_1324900	SEED			L-lactate dehydrogenase (LDH)
PF3D7_0708400	SEED			heat shock protein 90 (HSP90)
PF3D7_1002100	SEED			EMP1-trafficking protein (PTP5)
PF3D7_1102700	SEED			early transcribed membrane protein 11.1 (ETRAMP11.1)
PF3D7_0936300	SEED			ring-exported protein 3 (REX3)
PF3D7_0201900	SEED			erythrocyte membrane protein 3 (EMP3)
PF3D7_0818900	SEED			heat shock protein 70 (HSP70)
PF3D7_1439900	SEED			triosephosphate isomerase (TIM)
PF3D7_1033200	SEED			early transcribed membrane protein 10.2 (ETRAMP10.2)
PF3D7_0202500	SEED			early transcribed membrane protein 2 (ETRAMP2)
PF3D7_1401400	SEED			early transcribed membrane protein 14.1 (ETRAMP14)
PF3D7_1016900	SEED			early transcribed membrane protein 10.3 (ETRAMP10.3)
PF3D7_1015900	SEED			enolase (ENO)
PF3D7_0936400	SEED			ring-exported protein 4 (REX4)
PF3D7_1001900	SEED			Plasmodium exported protein (hyp16), unknown function (PfJ23)
PF3D7_0822600	SEED			protein transport protein SEC23 (SEC23)
PF3D7_0214100	SEED			protein transport protein SEC31 (SEC31)
PF3D7_0626800	SEED			pyruvate kinase (PyrK)
PF3D7_0501100.2	SEED			heat shock protein 40, type II (HSP40)
PF3D7_1462800	SEED			glyceraldehyde-3-phosphate dehydrogenase (GAPDH)
PF3D7_1353200	SEED			membrane associated histidine-rich protein (MAHRP2)
PF3D7_1302000	SEED			EMP1-trafficking protein (PTP6)
PF3D7_0406200	SEED			sexual stage-specific protein precursor (Pfs16)
PF3D7_0826700	SEED			receptor for activated c kinase (RACK)
PF3D7_0935900	SEED			ring-exported protein 1 (REX1)
PF3D7_0513300	SEED			purine nucleoside phosphorylase (PNP)
PF3D7_0201600	SEED			PHISTb domain-containing RESA-like protein 1 (RLP1)
PF3D7_0917900	SEED			heat shock protein 70 (HSP70-2)
PF3D7_0501000	SEED			Plasmodium exported protein, unknown function
PF3D7_0731100	SEED			EMP1-trafficking protein (PTP2)
PF3D7_0730900	SEED			EMP1-trafficking protein (PTP4)
PF3D7_0416800	SEED			small GTP-binding protein sar1 (SAR1)
PF3D7_0202200	SEED			EMP1-trafficking protein (PTP1)
PF3D7_1012400	SEED			hypoxanthine-guanine phosphoribosyltransferase (HGPRT)
PF3D7_1102800	SEED			early transcribed membrane protein 11.2 (ETRAMP11.2)
PF3D7_1240100	SEED			early transcribed membrane protein 12 (ETRAMP12)
PF3D7_1471100	SEED			exported protein 2 (EXP2)
PF3D7_0532100	SEED			early transcribed membrane protein 5 (ETRAMP5)
PF3D7_0424600	SEED			Plasmodium exported protein (PHISTb), unknown function
PF3D7_0532300	SEED			Plasmodium exported protein (PHISTb), unknown function
PF3D7_1229400	SEED			macrophage migration inhibitory factor (MIF)
PF3D7_0929400	SEED			high molecular weight rhoptry protein 2 (RhopH2)
PF3D7_1444800	SEED			fructose-bisphosphate aldolase (FBPA)
PF3D7_1121600	SEED			exported protein 1 (EXP1)
PF3D7_1016300	SEED			glycophorin binding protein (GBP)
PF3D7_0207600	SEED			serine repeat antigen 5 (SERA5)
PF3D7_1038400	SEED			gametocyte-specific protein (Pf11-1)
PF3D7_1228600	SEED			merozoite surface protein 9 (MSP9)
PF3D7_0905400	SEED			high molecular weight rhoptry protein 3 (RhopH3)
PF3D7_0501200	SEED			parasite-infected erythrocyte surface protein (PIESP2)
PF3D7_1008900	SEED			adenylate kinase (AK1)
PF3D7_1335100	SEED			merozoite surface protein 7 (MSP7)
PF3D7_0501500	SEED			rhoptry-associated protein 3 (RAP3)
PF3D7_0302500	SEED			cytoadherence linked asexual protein 3.1 (CLAG3.1)
PF3D7_0827900	SEED			protein disulfide isomerase (PDI8)
PF3D7_0303000	SEED			N-ethylmaleimide-sensitive fusion protein (NSF)
PF3D7_0302200	SEED			cytoadherence linked asexual protein 3.2 (CLAG3.2)
PF3D7_0702100	SEED			Plasmodium exported protein (PHISTb), unknown function, pseudogene
PF3D7_1117700	SEED			GTP-binding nuclear protein RAN/TC4 (RAN)
PF3D7_0310400	SEED			parasite-infected erythrocyte surface protein (PIESP1)
PF3D7_0818200	SEED			14-3-3 protein (14-3-3I)
PF3D7_0702400	SEED			small exported membrane protein 1 (SEMP1)
PF3D7_1101500	SEED			exported protein family 4 (EPF4)
PF3D7_1037300	SEED			ADP/ATP transporter on adenylate translocase (ADT)
PF3D7_1456800	SEED			V-type H(+)-translocating pyrophosphatase, putative (VP1)
PF3D7_1216200	SEED			glycerol-3-phosphate dehydrogenase, putative
PF3D7_1343000	SEED			phosphoethanolamine N-methyltransferase (PMT)
PF3D7_1479000	SEED			acyl-CoA synthetase (ACS1a)
PF3D7_0312400	SEED			glycogen synthase kinase 3 (GSK3)
PF3D7_1301200	SEED			glycophorin binding protein (GBPH2)
PF3D7_1414400	SEED			serine/threonine protein phosphatase PP1 (PP1)
PF3D7_1445700	SEED			conserved Plasmodium protein, unknown function
PF3D7_0936800	PREDICTED	0.038	0.00193353	Plasmodium exported protein (PHISTc), unknown function
PF3D7_0730800.2	PREDICTED	0.027	0.00155811	Plasmodium exported protein, unknown function
PF3D7_0201800	PREDICTED	0.039	0.00107922	knob associated heat shock protein 40 (KAHsp40)
PF3D7_1401100	PREDICTED	0.026	0.000948098	DnaJ protein, putative
PF3D7_0201700	PREDICTED	0.034	0.000936874	DnaJ protein, putative
PF3D7_0935600	PREDICTED	0.045	0.000896631	gametocytogenesis-implicated protein (GIG)
PF3D7_1436000	PREDICTED	0.049	0.000884401	glucose-6-phosphate isomerase (GPI)
PF3D7_0201500	PREDICTED	0.046	0.000863012	Plasmodium exported protein (hyp9), unknown function
PF3D7_0113700	PREDICTED	0.028	0.000850632	heat shock protein 40, type II (HSP40)
PF3D7_0830600	PREDICTED	0.049	0.000839665	Plasmodium exported protein (PHISTc), unknown function
PF3D7_1347200	PREDICTED	0.026	0.000757285	nucleoside transporter 1 (NT1)
PF3D7_1361100	PREDICTED	0.048	0.00071452	protein transport protein Sec24A (SEC24A)
PF3D7_1200700	PREDICTED	0.05	0.000710958	acyl-CoA synthetase (ACS7)
PF3D7_0405100	PREDICTED	0.039	0.000689717	protein transport protein Sec24B (SEC24B)
PF3D7_0501400	PREDICTED	0.032	0.000670943	interspersed repeat antigen (FIRA)
PF3D7_1352900	PREDICTED	0.039	0.000649762	Plasmodium exported protein, unknown function
PF3D7_1148900	PREDICTED	0.04	0.000647853	Plasmodium exported protein, unknown function
PF3D7_1016800	PREDICTED	0.049	0.000597163	Plasmodium exported protein (PHISTc), unknown function
PF3D7_1438900	PREDICTED	0.045	0.000585004	thioredoxin peroxidase 1 (Trx-Px1)
PF3D7_0711500	PREDICTED	0.038	0.000583141	regulator of chromosome condensation, putative
PF3D7_1033900	PREDICTED	0.046	0.000566419	ubiquitin-conjugating enzyme, putative
PF3D7_0936500	PREDICTED	0.049	0.000505221	virulence-associated protein 1 (VAP1)
PF3D7_0220200	PREDICTED	0.032	0.000364956	Plasmodium exported protein, unknown function
PF3D7_0935500	PREDICTED	0.046	0.000271494	Plasmodium exported protein, unknown function (GEXP22)
PF3D7_1250100	PREDICTED	0.014	0.000269894	osmiophilic body protein (G377)
PF3D7_1478800	PREDICTED	0.041	0.000247008	Plasmodium exported protein, unknown function
PF3D7_0401900	PREDICTED	0.047	0.000229525	acyl-CoA synthetase (ACS6)
PF3D7_0525100	PREDICTED	0.047	0.000225858	acyl-CoA synthetase (ACS10)
PF3D7_1253400	PREDICTED	0.047	0.000225845	acyl-CoA synthetase (ACS3)
PF3D7_1318200	PREDICTED	0.043	0.000221551	glycerol-3-phosphate 1-O-acyltransferase, putative (G3PAT)
PF3D7_1404100	PREDICTED	0.048	0.000195172	cytochrome c, putative
PF3D7_1217300	PREDICTED	0.031	0.000172769	GTP-binding protein, putative
PF3D7_1329400	PREDICTED	0.05	0.00016694	AMP deaminase, putative
PF3D7_0715500	PREDICTED	0.044	0.000149293	mitochondrial ATP synthase F1, epsilon subunit, putative
PF3D7_1323200	PREDICTED	0.012	0.000147721	V-type proton ATPase subunit G, putative
PF3D7_0914000	PREDICTED	0.015	0.00014577	pseudouridylate synthase, putative
PF3D7_1124000	PREDICTED	0.043	0.000130971	endoplasmic reticulum oxidoreductin, putative (ERO1)
PF3D7_1129100	PREDICTED	0.025	0.000104296	parasitophorous vacuolar protein 1 (PV1)
