# Supplementary material for: A network-based approach reveals novel invasion and Maurer's clefts-related proteins in Plasmodium falciparum
Source: Royal Society of Chemistry journal article supplement (doi:10.1039/c9mo00124g), 2019-10-10
Supplement: c9mo00124g1.zip [file c9mo00124g1.zip › supplementary_file_8.xls]

## Sheet: Details
A network-based approach reveals novel invasion and Maurer’s clefts-related proteins in Plasmodium falciparum
Dibyajyoti Das, Sowmya Ramaswamy Krishnan, Arijit Roy* and Gopalakrishnan Bulusu*
TCS Innovation Labs – Hyderabad (Life Sciences Division), Tata Consultancy Services Limited, Hyderabad, India
* Corresponding author
E-mail: roy.arijit3@tcs.com, g.bulusu@tcs.com
Supplementary file 8: List of invasion and Maurer's clefts related proteins those were predicted by RWR method followed by permutation test but subsequently removed by enrichment test.
Each tab contains the below grouoed details:
Reactome_ID from reactome DB
Pathway description of the reactome ID
Total MC Proteins in the pathway
Number of seed proteins in the pathway
Number of RWR predicted proteins in the pathway
Genes present in the pathway

## Sheet: Pathway genes
Reactome_ID	Pathway	Total MC Proteins	Seeds	RWR_predicted	Genes_in_seeds	Genes_in_prediction
R-PFA-392499	Metabolism of proteins	21	6	15	PF3D7_0214100,PF3D7_0303000,PF3D7_0416800,PF3D7_0822600,PF3D7_1038400,PF3D7_1437800	PF3D7_0214000,PF3D7_0309600,PF3D7_0310700,PF3D7_0320100,PF3D7_0405100,PF3D7_0418500,PF3D7_0512600,PF3D7_0618700,PF3D7_0913200,PF3D7_1033900,PF3D7_1204300,PF3D7_1230700,PF3D7_1332300,PF3D7_1358800,PF3D7_1361100
R-PFA-1430728	Metabolism	23	10	13	PF3D7_0626800,PF3D7_0708400,PF3D7_1008900,PF3D7_1012400,PF3D7_1015900,PF3D7_1216200,PF3D7_1324900,PF3D7_1439900,PF3D7_1444800,PF3D7_1462800	PF3D7_0525100,PF3D7_0624000,PF3D7_0922200,PF3D7_0922500,PF3D7_1029600,PF3D7_1120100,PF3D7_1124600,PF3D7_1253100,PF3D7_1329400,PF3D7_1351600,PF3D7_1401800,PF3D7_1444300,PF3D7_1478000
R-PFA-168256	Immune System	20	8	12	PF3D7_0416800,PF3D7_0626800,PF3D7_0708400,PF3D7_0818900,PF3D7_0822600,PF3D7_1222300,PF3D7_1229400,PF3D7_1444800	PF3D7_0214000,PF3D7_0322000,PF3D7_0405100,PF3D7_0501400,PF3D7_0624000,PF3D7_1033900,PF3D7_1120100,PF3D7_1200600,PF3D7_1323200,PF3D7_1329400,PF3D7_1361100,PF3D7_1444300
R-PFA-597592	Post-translational protein modification	17	6	11	PF3D7_0214100,PF3D7_0303000,PF3D7_0416800,PF3D7_0822600,PF3D7_1038400,PF3D7_1437800	PF3D7_0310700,PF3D7_0320100,PF3D7_0405100,PF3D7_0418500,PF3D7_0512600,PF3D7_0618700,PF3D7_1033900,PF3D7_1204300,PF3D7_1230700,PF3D7_1332300,PF3D7_1361100
R-PFA-199991	Membrane Trafficking	15	5	10	PF3D7_0214100,PF3D7_0303000,PF3D7_0416800,PF3D7_0822600,PF3D7_1437800	PF3D7_0310700,PF3D7_0320100,PF3D7_0405100,PF3D7_0418500,PF3D7_0512600,PF3D7_0618700,PF3D7_1114200,PF3D7_1230700,PF3D7_1332300,PF3D7_1361100
R-PFA-5653656	Vesicle-mediated transport	15	5	10	PF3D7_0214100,PF3D7_0303000,PF3D7_0416800,PF3D7_0822600,PF3D7_1437800	PF3D7_0310700,PF3D7_0320100,PF3D7_0405100,PF3D7_0418500,PF3D7_0512600,PF3D7_0618700,PF3D7_1114200,PF3D7_1230700,PF3D7_1332300,PF3D7_1361100
R-PFA-446203	Asparagine N-linked glycosylation	14	5	9	PF3D7_0214100,PF3D7_0303000,PF3D7_0416800,PF3D7_0822600,PF3D7_1437800	PF3D7_0310700,PF3D7_0320100,PF3D7_0405100,PF3D7_0418500,PF3D7_0512600,PF3D7_0618700,PF3D7_1230700,PF3D7_1332300,PF3D7_1361100
R-PFA-204005	COPII-mediated vesicle transport	14	5	9	PF3D7_0214100,PF3D7_0303000,PF3D7_0416800,PF3D7_0822600,PF3D7_1437800	PF3D7_0310700,PF3D7_0320100,PF3D7_0405100,PF3D7_0418500,PF3D7_0512600,PF3D7_0618700,PF3D7_1230700,PF3D7_1332300,PF3D7_1361100
R-PFA-199977	ER to Golgi Anterograde Transport	14	5	9	PF3D7_0214100,PF3D7_0303000,PF3D7_0416800,PF3D7_0822600,PF3D7_1437800	PF3D7_0310700,PF3D7_0320100,PF3D7_0405100,PF3D7_0418500,PF3D7_0512600,PF3D7_0618700,PF3D7_1230700,PF3D7_1332300,PF3D7_1361100
R-PFA-168249	Innate Immune System	14	5	9	PF3D7_0626800,PF3D7_0708400,PF3D7_0818900,PF3D7_1229400,PF3D7_1444800	PF3D7_0214000,PF3D7_0322000,PF3D7_0501400,PF3D7_0624000,PF3D7_1120100,PF3D7_1200600,PF3D7_1323200,PF3D7_1329400,PF3D7_1444300
R-PFA-948021	Transport to the Golgi and subsequent modification	14	5	9	PF3D7_0214100,PF3D7_0303000,PF3D7_0416800,PF3D7_0822600,PF3D7_1437800	PF3D7_0310700,PF3D7_0320100,PF3D7_0405100,PF3D7_0418500,PF3D7_0512600,PF3D7_0618700,PF3D7_1230700,PF3D7_1332300,PF3D7_1361100
R-PFA-6798695	Neutrophil degranulation	13	5	8	PF3D7_0626800,PF3D7_0708400,PF3D7_0818900,PF3D7_1229400,PF3D7_1444800	PF3D7_0214000,PF3D7_0322000,PF3D7_0501400,PF3D7_0624000,PF3D7_1120100,PF3D7_1200600,PF3D7_1329400,PF3D7_1444300
R-PFA-556833	Metabolism of lipids	8	1	7	PF3D7_1216200	PF3D7_0525100,PF3D7_1124600,PF3D7_1253100,PF3D7_1351600,PF3D7_1401800,PF3D7_1444300,PF3D7_1478000
R-PFA-9007101	Rab regulation of trafficking	7	1	6	PF3D7_1437800	PF3D7_0310700,PF3D7_0418500,PF3D7_0512600,PF3D7_0618700,PF3D7_1114200,PF3D7_1332300
R-PFA-8953897	Cellular responses to external stimuli	11	5	6	PF3D7_0708400,PF3D7_0818900,PF3D7_0827900,PF3D7_0917900,PF3D7_1134000	PF3D7_0201800,PF3D7_0213100,PF3D7_1124000,PF3D7_1211400,PF3D7_1311700,PF3D7_1404100
R-PFA-2262752	Cellular responses to stress	11	5	6	PF3D7_0708400,PF3D7_0818900,PF3D7_0827900,PF3D7_0917900,PF3D7_1134000	PF3D7_0201800,PF3D7_0213100,PF3D7_1124000,PF3D7_1211400,PF3D7_1311700,PF3D7_1404100
R-PFA-8876198	RAB GEFs exchange GTP for GDP on RABs	6	1	5	PF3D7_1437800	PF3D7_0310700,PF3D7_0418500,PF3D7_0512600,PF3D7_0618700,PF3D7_1332300
R-PFA-8978868	Fatty acid metabolism	3	0	3		PF3D7_0525100,PF3D7_1253100,PF3D7_1478000
R-PFA-72766	Translation	3	0	3		PF3D7_0309600,PF3D7_0913200,PF3D7_1358800
R-PFA-3299685	Detoxification of Reactive Oxygen Species	4	1	3	PF3D7_0827900	PF3D7_1124000,PF3D7_1311700,PF3D7_1404100
R-PFA-1483206	Glycerophospholipid biosynthesis	4	1	3	PF3D7_1216200	PF3D7_1124600,PF3D7_1401800,PF3D7_1444300
R-PFA-8953854	Metabolism of RNA	4	1	3	PF3D7_0818900	PF3D7_0309600,PF3D7_1244200,PF3D7_1358800
R-PFA-1483257	Phospholipid metabolism	4	1	3	PF3D7_1216200	PF3D7_1124600,PF3D7_1401800,PF3D7_1444300
R-PFA-1280218	Adaptive Immune System	5	2	3	PF3D7_0416800,PF3D7_0822600	PF3D7_0405100,PF3D7_1033900,PF3D7_1361100
R-PFA-5694530	Cargo concentration in the ER	5	2	3	PF3D7_0416800,PF3D7_0822600	PF3D7_0320100,PF3D7_0405100,PF3D7_1361100
R-PFA-983169	Class I MHC mediated antigen processing & presentation	5	2	3	PF3D7_0416800,PF3D7_0822600	PF3D7_0405100,PF3D7_1033900,PF3D7_1361100
R-PFA-162582	Signal Transduction	5	2	3	PF3D7_0708400,PF3D7_0818200	PF3D7_0201800,PF3D7_0213100,PF3D7_1323200
R-PFA-3371556	Cellular response to heat stress	6	3	3	PF3D7_0818900,PF3D7_0917900,PF3D7_1134000	PF3D7_0201800,PF3D7_0213100,PF3D7_1211400
R-PFA-3371453	Regulation of HSF1-mediated heat shock response	6	3	3	PF3D7_0818900,PF3D7_0917900,PF3D7_1134000	PF3D7_0201800,PF3D7_0213100,PF3D7_1211400
R-PFA-70326	Glucose metabolism	8	5	3	PF3D7_0626800,PF3D7_1015900,PF3D7_1439900,PF3D7_1444800,PF3D7_1462800	PF3D7_0624000,PF3D7_0922500,PF3D7_1120100
R-PFA-71387	Metabolism of carbohydrates	8	5	3	PF3D7_0626800,PF3D7_1015900,PF3D7_1439900,PF3D7_1444800,PF3D7_1462800	PF3D7_0624000,PF3D7_0922500,PF3D7_1120100
R-PFA-6811434	COPI-dependent Golgi-to-ER retrograde traffic	3	1	2	PF3D7_0303000	PF3D7_0320100,PF3D7_0512600
R-PFA-8856688	Golgi-to-ER retrograde transport	3	1	2	PF3D7_0303000	PF3D7_0320100,PF3D7_0512600
R-PFA-6811442	Intra-Golgi and retrograde Golgi-to-ER traffic	3	1	2	PF3D7_0303000	PF3D7_0320100,PF3D7_0512600
R-PFA-8956321	Nucleotide salvage	3	1	2	PF3D7_1012400	PF3D7_1029600,PF3D7_1329400
R-PFA-74217	Purine salvage	3	1	2	PF3D7_1012400	PF3D7_1029600,PF3D7_1329400
R-PFA-382551	Transport of small molecules	3	1	2	PF3D7_1037300	PF3D7_1132800,PF3D7_1347200
R-PFA-983170	Antigen Presentation: Folding, assembly and peptide loading of class I MHC	4	2	2	PF3D7_0416800,PF3D7_0822600	PF3D7_0405100,PF3D7_1361100
R-PFA-70263	Gluconeogenesis	4	2	2	PF3D7_1015900,PF3D7_1444800	PF3D7_0922500,PF3D7_1120100
R-PFA-3371497	HSP90 chaperone cycle for steroid hormone receptors (SHR)	4	2	2	PF3D7_0708400,PF3D7_0818900	PF3D7_0201800,PF3D7_0213100
R-PFA-15869	Metabolism of nucleotides	4	2	2	PF3D7_1008900,PF3D7_1012400	PF3D7_1029600,PF3D7_1329400
R-PFA-70171	Glycolysis	5	3	2	PF3D7_0626800,PF3D7_1439900,PF3D7_1462800	PF3D7_0624000,PF3D7_1120100
